# Supplementary material for: Transcriptomic profile of leg muscle during early growth and development in Haiyang yellow chicken
Source: Copernicus journal article supplement (doi:10.5194/aab-64-405-2021), 2021-09-20
Supplement: Supplementary file 1 [file Table S1.xlsx]

## Sheet: Sheet1
Table S1 Primers used for the validation of DEGs by qRT-PCR
Gene	Primer	Sequence(5’ to 3’)	Annealing temp (◦C)	Product size (bp)
S100A10	P1	TTCCACAAATACGCGGGTGA	60	186
		AGCCACCAGTGAGAAGAAGC
COX7B	P2	TATGGAAATCTGGTGCTGATCG	61	187
		CAGTTCATTGCAAGCAAAGGC
SLC25A5	P3	TACCAGGGCTTCAACGTGTC	62	188
		CCGAACGGTATCGAAGGGAT
NDUFB4	P4	AACCGCTACGTTTCGTTGCC	63	189
		CGGAAAGTGGGGTACACGTT
GST2L	P5	TGCTGGAGAACCAGGTGATG	64	190
		AACCACTTTCTGTCCCCCAG
TMEM33	P6	GACACAGCAATGTGGATTTCCC	65	191
		CTTTGGTGTAGTCGGAGAGCA
CHAD	P7	CTGAAGCTTTCCCACAACCC	66	192
		CTTGTCAAAGGGGAAGTTGCG
CFL2	P8	TACGGCCTTTGTGAAGTTGC	67	193
		TAAAGGTGCGCTTTCAGGAG
ACTC	P9	CGCTGCCCGGAAACCTTATT	68	194
		GTACCACCTGAGAGGACGTTG
β-actin	P10	CAGCCATCTTTCTTGGGTAT	69	195
		CTGTGATCTCCTTCTGCATCC
HSP70	P11	TCTGCTCCTGTTGGATGTC	70	196
		TGGGAATGGTGGTGTTACG
