# Supplementary material for: Transcriptomic profile of leg muscle during early growth and development in Haiyang yellow chicken
Source: Copernicus journal article supplement (doi:10.5194/aab-64-405-2021), 2021-09-20
Supplement: Supplementary file 2 [file Table S2.xlsx]

## Sheet: E12 vs E16
Gene_id	readcount_H_E12_F	readcount_H_E16_F	log2FoldChange	pval	padj
ENSGALG00000032672	9726.07	0.779163	13.608	3.9286e-179	9.5764e-175
ENSGALG00000012790	6174.28	31.1846	7.6293	2.2357e-129	2.7248e-125
ENSGALG00000010657	2481.78	2.41478	10.005	7.5079e-106	6.1004e-102
ENSGALG00000011358	1403.68	6.93613	7.6609	6.7876e-95	4.1363e-91
ENSGALG00000000608	5583.2	69.1884	6.3344	1.443e-83	7.0351e-80
ENSGALG00000042386	3027.84	7.09467	8.7373	2.5164e-81	1.0223e-77
ENSGALG00000001405	1151.54	18.5374	5.957	8.0839e-73	2.815e-69
Novel01712	51.7453	2768.13	-5.7413	2.0512e-70	6.25e-67
ENSGALG00000039966	789.248	6.86867	6.8443	2.0124e-69	5.4505e-66
ENSGALG00000034680	196.332	7186.95	-5.194	7.6169e-67	1.8567e-63
Novel02761	1157.19	25231.1	-4.4465	5.466e-66	1.2113e-62
ENSGALG00000027742	22.0792	998.821	-5.4995	5.1891e-65	1.0541e-61
ENSGALG00000032619	731.812	15500.8	-4.4047	1.1905e-63	2.2322e-60
ENSGALG00000041671	433.85	0.466514	9.8611	5.081e-62	8.8467e-59
ENSGALG00000002108	2989.69	4.68037	9.3192	1.1571e-61	1.8804e-58
Novel01064	422.142	0.466514	9.8216	8.2866e-61	1.2625e-57
ENSGALG00000006412	439.35	0.625298	9.4566	9.4741e-61	1.3585e-57
ENSGALG00000021271	500.084	3.11665	7.326	7.8709e-60	1.0659e-56
ENSGALG00000001518	412.633	0.937946	8.7811	2.1315e-57	2.7346e-54
ENSGALG00000033271	634.418	10737.7	-4.0811	9.1989e-57	1.1212e-53
ENSGALG00000031403	229.759	5879.2	-4.6774	1.2553e-55	1.4571e-52
ENSGALG00000031076	411.394	1.71711	7.9044	3.276e-55	3.6298e-52
Novel02911	500.064	5.99794	6.3815	4.9898e-55	5.2883e-52
ENSGALG00000000299	802.609	14.5488	5.7857	2.5278e-54	2.5674e-51
Novel01534	2417.12	8.66775	8.1234	8.1691e-54	7.9652e-51
ENSGALG00000034868	6024.05	176.649	5.0918	2.4977e-53	2.3417e-50
ENSGALG00000027536	778.873	1.55833	8.9652	8.1356e-53	7.345e-50
ENSGALG00000016680	333.248	0.3897	9.74	3.3805e-52	2.943e-49
ENSGALG00000028210	63.7867	1312.62	-4.363	1.0011e-49	8.4152e-47
ENSGALG00000030349	406.758	0.702349	9.1778	9.5485e-49	7.7585e-46
Novel00650	2310.71	150.406	3.9414	1.8387e-48	1.4458e-45
ENSGALG00000008969	2726.23	5.1518	9.0476	7.242e-47	5.5166e-44
ENSGALG00000028047	341.183	2.72743	6.9669	8.8882e-47	6.5654e-44
ENSGALG00000030629	1169.33	5.38716	7.7619	1.2568e-46	9.0105e-44
ENSGALG00000008424	2764.42	2.57332	10.069	5.86e-46	4.0812e-43
ENSGALG00000029697	13.5442	475.35	-5.1332	8.8932e-46	6.0217e-43
ENSGALG00000012775	852.827	5.14641	7.3725	1.5801e-45	1.041e-42
ENSGALG00000031183	677.357	1.56324	8.7592	2.3781e-45	1.5255e-42
ENSGALG00000028570	293.961	1.2506	7.8769	8.2915e-45	5.1824e-42
ENSGALG00000006027	140.246	1912.87	-3.7697	1.1506e-44	7.0117e-42
ENSGALG00000030002	1578.21	0.312649	12.301	1.5108e-44	8.9821e-42
ENSGALG00000015140	561.868	1.16886	8.909	2.617e-44	1.5189e-41
ENSGALG00000031242	39.5116	782.187	-4.3072	4.3096e-43	2.4431e-40
ENSGALG00000005754	5.26027	415.859	-6.3048	1.4014e-42	7.7639e-40
ENSGALG00000027514	256.276	0.933028	8.1016	2.2658e-42	1.2274e-39
ENSGALG00000005972	3.82215	313.083	-6.356	2.3848e-40	1.2637e-37
ENSGALG00000017398	608.767	0.466514	10.35	3.1154e-40	1.6158e-37
ENSGALG00000040995	2285.61	22290.5	-3.2858	1.1179e-39	5.6773e-37
ENSGALG00000006344	353.517	3641.25	-3.3646	1.1861e-39	5.9007e-37
ENSGALG00000008231	1361.89	16019	-3.5561	3.1319e-39	1.5269e-36
ENSGALG00000029943	354.986	8.96168	5.3078	5.8447e-39	2.7935e-36
ENSGALG00000017136	256.11	2.41454	6.7289	8.4664e-39	3.9688e-36
ENSGALG00000011016	612.613	5670.66	-3.2105	9.0997e-39	4.1852e-36
ENSGALG00000031960	2388.18	148.323	4.0091	1.0954e-38	4.9447e-36
ENSGALG00000013900	537.383	26.2593	4.3551	1.18e-38	5.2298e-36
ENSGALG00000010992	271.296	3.12157	6.4415	4.5993e-38	2.002e-35
ENSGALG00000010357	336.837	3262.26	-3.2757	5.7712e-38	2.468e-35
ENSGALG00000013193	764.249	3.3574	7.8306	7.2474e-38	3.0459e-35
ENSGALG00000007110	57.0556	1492.62	-4.7093	9.7234e-38	4.0172e-35
ENSGALG00000029150	1522.06	13382.1	-3.1362	1.9435e-37	7.8958e-35
ENSGALG00000008593	210.755	5907.62	-4.8089	2.2969e-37	9.1784e-35
ENSGALG00000004249	742.182	50.4351	3.8793	4.8217e-37	1.8957e-34
ENSGALG00000016620	15.4772	2082.85	-7.0723	1.3305e-36	5.1478e-34
ENSGALG00000008659	225.659	3180.07	-3.8168	2.0432e-36	7.7822e-34
ENSGALG00000030247	220.061	2111.51	-3.2623	3.7124e-36	1.3922e-33
ENSGALG00000006260	394.554	3609.68	-3.1936	1.0072e-35	3.7197e-33
ENSGALG00000004320	1704.51	8.72513	7.61	1.039e-35	3.7802e-33
ENSGALG00000036346	70.9722	885.739	-3.6416	1.6044e-35	5.7513e-33
ENSGALG00000035845	398.263	3614.79	-3.1821	2.64e-35	9.3263e-33
ENSGALG00000003374	2102.42	3.27543	9.3261	1.0307e-34	3.5892e-32
ENSGALG00000005843	4855.19	40130.4	-3.0471	1.1683e-34	4.011e-32
ENSGALG00000024398	2486.82	18696.5	-2.9104	1.3855e-34	4.6905e-32
ENSGALG00000011618	339.631	2933.6	-3.1106	2.653e-34	8.8588e-32
ENSGALG00000019718	3254.73	49.8501	6.0288	3.3769e-34	1.1124e-31
ENSGALG00000041031	38.2474	563.17	-3.8801	3.8337e-34	1.246e-31
ENSGALG00000031744	846.12	18628.3	-4.4605	4.5519e-34	1.46e-31
ENSGALG00000015345	206.895	1.32765	7.2839	4.9345e-34	1.546e-31
ENSGALG00000034427	14.4934	863.347	-5.8965	4.9469e-34	1.546e-31
ENSGALG00000032903	181.021	1622.73	-3.1642	8.2313e-34	2.5398e-31
ENSGALG00000011355	363.841	0	Inf	2.1171e-33	6.4508e-31
ENSGALG00000030894	4490.34	34848.7	-2.9562	3.5866e-33	1.0794e-30
ENSGALG00000010826	206.322	1876.86	-3.1853	4.6712e-33	1.3886e-30
ENSGALG00000007412	313.239	9.83193	4.9936	5.4178e-33	1.5911e-30
ENSGALG00000032910	199.183	1707.36	-3.0996	7.9591e-33	2.3096e-30
ENSGALG00000007690	607.017	2.49675	7.9255	1.0376e-32	2.9755e-30
ENSGALG00000026862	3936.85	326.892	3.5902	6.1369e-32	1.7394e-29
ENSGALG00000028871	250.734	1929.76	-2.9442	7.4614e-32	2.0906e-29
Novel00194	384.9	3.03984	6.9843	8.0794e-32	2.238e-29
ENSGALG00000006835	10405.2	115089	-3.4674	1.3623e-31	3.7311e-29
ENSGALG00000031552	933.928	7903.87	-3.0812	1.4191e-31	3.8437e-29
ENSGALG00000013762	346.706	0.312649	10.115	2.3665e-31	6.3392e-29
ENSGALG00000001926	2757.46	19063.7	-2.7894	2.9947e-31	7.9347e-29
ENSGALG00000016415	852.793	63.1547	3.7552	3.734e-31	9.7872e-29
ENSGALG00000043727	156.02	1304.4	-3.0636	1.3927e-30	3.6114e-28
ENSGALG00000003690	8341.89	78.8955	6.7243	1.5516e-30	3.9814e-28
Novel00629	920.303	7309.97	-2.9897	1.9794e-30	5.026e-28
ENSGALG00000004503	410.029	2965.6	-2.8545	7.2099e-30	1.8119e-27
ENSGALG00000015410	325	2465.12	-2.9231	1.4073e-29	3.5006e-27
ENSGALG00000020505	218.747	1771.13	-3.0173	2.5717e-29	6.2688e-27
ENSGALG00000038672	1474.05	9153.65	-2.6346	2.5624e-29	6.2688e-27
Novel01024	1319.66	3.04476	8.7596	3.8275e-29	9.2375e-27
ENSGALG00000011086	9319.53	320441	-5.1037	8.7197e-29	2.0838e-26
ENSGALG00000039712	63.9003	2168.22	-5.0845	1.1436e-28	2.7064e-26
Novel03257	7.28403	505.908	-6.118	2.1038e-28	4.931e-26
Novel00085	13.7156	604.888	-5.4628	2.3865e-28	5.5404e-26
ENSGALG00000037443	312.997	2118.24	-2.7586	3.5123e-28	8.077e-26
ENSGALG00000037687	135.694	0	Inf	4.5307e-28	1.0322e-25
ENSGALG00000026687	44.9176	715.313	-3.9932	6.8784e-28	1.5525e-25
ENSGALG00000022557	477.27	4.83423	6.6254	7.0081e-28	1.5672e-25
ENSGALG00000043112	4.29784	235.769	-5.7776	7.2919e-28	1.6159e-25
ENSGALG00000040529	852.275	85.3046	3.3206	7.7995e-28	1.7128e-25
ENSGALG00000008741	28.9715	393.363	-3.7632	9.8449e-28	2.1427e-25
ENSGALG00000008814	7.36473	331.707	-5.4931	1.2428e-27	2.681e-25
ENSGALG00000016843	4028.27	24702.1	-2.6164	1.4782e-27	3.1607e-25
ENSGALG00000021552	0.859569	130.44	-7.2456	2.6383e-27	5.5922e-25
ENSGALG00000014505	281.005	0.933028	8.2345	3.0276e-27	6.3621e-25
ENSGALG00000030879	370.203	2410.09	-2.7027	3.0825e-27	6.4221e-25
ENSGALG00000006591	3416.45	82420	-4.5924	4.194e-27	8.6639e-25
ENSGALG00000014687	653.392	0.625298	10.029	4.5273e-27	9.2737e-25
ENSGALG00000032193	24.2347	343.927	-3.827	5.6198e-27	1.1416e-24
ENSGALG00000015142	370.021	25.5815	3.8544	7.6921e-27	1.5496e-24
Novel02587	413.008	3433.66	-3.0555	7.8596e-27	1.5704e-24
Novel00106	12.1908	250.109	-4.3587	2.8533e-26	5.6547e-24
ENSGALG00000012155	66.9832	979.497	-3.8702	3.071e-26	6.037e-24
ENSGALG00000023933	240.115	2976.47	-3.6318	5.7972e-26	1.1305e-23
ENSGALG00000002198	428.497	2562.69	-2.5803	6.0533e-26	1.1711e-23
ENSGALG00000001633	254.03	1678.94	-2.7245	6.298e-26	1.2088e-23
ENSGALG00000041344	1239.67	7179.44	-2.5339	6.7345e-26	1.2825e-23
Novel02659	13.0624	314.104	-4.5878	8.2969e-26	1.5678e-23
ENSGALG00000042360	1277.24	3.593	8.4736	8.3719e-26	1.5698e-23
ENSGALG00000018946	667.193	4719.85	-2.8226	9.1572e-26	1.7039e-23
ENSGALG00000006572	6194.53	118449	-4.2571	9.7357e-26	1.7979e-23
ENSGALG00000032647	1481.55	8279.9	-2.4825	9.927e-26	1.8194e-23
Novel01212	1744.45	31.1953	5.8053	1.2349e-25	2.2464e-23
ENSGALG00000026452	1023.48	12196.8	-3.575	1.3168e-25	2.3777e-23
ENSGALG00000010881	107.506	917.917	-3.094	1.4589e-25	2.6149e-23
ENSGALG00000040189	325.348	0.3897	9.7054	1.6701e-25	2.9715e-23
ENSGALG00000035211	384.891	2339.32	-2.6036	2.6756e-25	4.7262e-23
ENSGALG00000000769	583.555	71.0376	3.0382	3.6455e-25	6.393e-23
ENSGALG00000023435	1472.97	55988.5	-5.2483	3.8271e-25	6.6636e-23
ENSGALG00000015602	15.1016	2706.93	-7.4858	4.1319e-25	7.1432e-23
ENSGALG00000042351	78.0918	619.622	-2.9881	6.5335e-25	1.1216e-22
ENSGALG00000035354	3.60004	152.968	-5.4091	6.8459e-25	1.167e-22
ENSGALG00000007786	83.6136	1614.68	-4.2714	1.5253e-24	2.5819e-22
ENSGALG00000036327	606.666	74.0507	3.0343	1.7282e-24	2.9054e-22
ENSGALG00000027703	73.4868	1095.97	-3.8986	2.103e-24	3.5112e-22
ENSGALG00000014453	78.293	655.146	-3.0649	2.1337e-24	3.525e-22
Novel01777	606.292	4098.98	-2.7572	2.1402e-24	3.525e-22
ENSGALG00000027771	885.532	11330.1	-3.6775	2.3722e-24	3.8808e-22
ENSGALG00000032534	3067.17	29820.3	-3.2813	5.8017e-24	9.4282e-22
ENSGALG00000028115	3113.56	9.0427	8.4276	6.5652e-24	1.0598e-21
ENSGALG00000004980	293.838	1776.87	-2.5962	8.3148e-24	1.3263e-21
ENSGALG00000039447	146.786	2.34264	5.9694	8.3246e-24	1.3263e-21
ENSGALG00000014995	274.317	1646.26	-2.5853	1.0093e-23	1.5976e-21
ENSGALG00000017075	179.799	1693.11	-3.2352	1.0463e-23	1.6455e-21
ENSGALG00000031454	71.9174	1096.68	-3.9307	1.3324e-23	2.082e-21
ENSGALG00000016342	2527.54	29416.5	-3.5408	1.5927e-23	2.4728e-21
ENSGALG00000005226	248.131	11495.7	-5.5338	2.2242e-23	3.4315e-21
ENSGALG00000006562	285.702	2211.84	-2.9527	3.0686e-23	4.7045e-21
ENSGALG00000026864	429.804	2393.29	-2.4772	3.1872e-23	4.8558e-21
ENSGALG00000009302	487.968	60.5968	3.0095	3.4128e-23	5.1671e-21
ENSGALG00000015018	2328.72	33429.8	-3.8435	4.3576e-23	6.5569e-21
ENSGALG00000005996	64.797	1465.42	-4.4992	4.4745e-23	6.6915e-21
ENSGALG00000009082	1315.19	7876.97	-2.5824	4.6086e-23	6.85e-21
ENSGALG00000036034	331.56	27.2293	3.606	5.2177e-23	7.7082e-21
ENSGALG00000040582	177.16	6.7771	4.7082	5.474e-23	8.0382e-21
ENSGALG00000010290	323.178	1880.33	-2.5406	6.3189e-23	9.2233e-21
ENSGALG00000031375	10.5766	199.144	-4.2349	6.788e-23	9.8491e-21
ENSGALG00000008604	181.022	1138.1	-2.6524	9.5503e-23	1.3775e-20
ENSGALG00000013651	110.462	746.084	-2.7558	1.8653e-22	2.6746e-20
ENSGALG00000042103	80.2516	576.596	-2.845	1.9143e-22	2.7288e-20
ENSGALG00000000498	235.94	1318	-2.4819	2.1757e-22	3.0834e-20
ENSGALG00000004260	1248.7	1.32765	9.8773	2.7174e-22	3.8288e-20
Novel00613	26.1378	664.035	-4.6671	3.6916e-22	5.1717e-20
ENSGALG00000037356	128.489	990.383	-2.9463	3.7353e-22	5.203e-20
ENSGALG00000042303	830.366	132.255	2.6504	3.9507e-22	5.4718e-20
ENSGALG00000017276	125.165	1.4047	6.4774	4.3151e-22	5.9427e-20
ENSGALG00000038512	64.3759	798.513	-3.6327	5.1407e-22	7.0399e-20
ENSGALG00000040623	142.431	906.349	-2.6698	5.1886e-22	7.0658e-20
Novel01198	122.405	1.63538	6.2259	5.251e-22	7.111e-20
ENSGALG00000016791	51.4242	440.378	-3.0982	6.6531e-22	8.96e-20
ENSGALG00000027415	79.1315	585.932	-2.8884	7.176e-22	9.6111e-20
ENSGALG00000031862	461.073	7.80218	5.885	8.1115e-22	1.0805e-19
ENSGALG00000032404	735.537	43587.7	-5.889	8.375e-22	1.1035e-19
ENSGALG00000037050	4198.6	24553.2	-2.5479	8.3422e-22	1.1035e-19
ENSGALG00000000059	562.89	17.3779	5.0175	8.5368e-22	1.1188e-19
ENSGALG00000042003	134.341	3.11173	5.432	1.0222e-21	1.3325e-19
ENSGALG00000039101	381.636	21.5412	4.147	1.1169e-21	1.4482e-19
ENSGALG00000031970	69.3887	746.155	-3.4267	1.2472e-21	1.6086e-19
Novel00168	234.991	3199.49	-3.7672	1.472e-21	1.8885e-19
Novel01925	1577.57	12264.7	-2.9587	1.5028e-21	1.918e-19
ENSGALG00000041478	1212.29	8441.16	-2.7997	1.5635e-21	1.985e-19
Novel01947	4.33747	137.048	-4.9817	1.5938e-21	2.013e-19
ENSGALG00000015055	323.046	2011	-2.6381	1.7735e-21	2.2284e-19
ENSGALG00000015124	458.119	58.2998	2.9742	1.8473e-21	2.3093e-19
ENSGALG00000019719	2729.47	7.72021	8.4658	2.0715e-21	2.5632e-19
ENSGALG00000031996	249.32	1378.91	-2.4675	2.0622e-21	2.5632e-19
ENSGALG00000023819	697.691	4307.04	-2.626	2.1957e-21	2.7032e-19
ENSGALG00000006755	383.504	2324.33	-2.5995	2.2101e-21	2.7073e-19
ENSGALG00000029354	446.965	56.4326	2.9856	2.6279e-21	3.2029e-19
ENSGALG00000026553	609.952	8053.57	-3.7229	2.8333e-21	3.436e-19
ENSGALG00000043779	382.734	41.4125	3.2082	2.8496e-21	3.4387e-19
ENSGALG00000030991	416.204	4.68061	6.4745	2.9721e-21	3.5689e-19
ENSGALG00000008351	589.452	7790.01	-3.7242	3.0069e-21	3.593e-19
ENSGALG00000030212	61.315	464.219	-2.9205	3.2028e-21	3.8084e-19
ENSGALG00000038170	182.833	1071.55	-2.5511	3.6735e-21	4.3469e-19
ENSGALG00000005849	1191.49	5639.82	-2.2429	4.391e-21	5.1708e-19
ENSGALG00000007335	11.4315	301.23	-4.7198	4.5554e-21	5.3386e-19
ENSGALG00000026264	54.76	1414.23	-4.6908	4.6931e-21	5.4737e-19
ENSGALG00000043448	140.869	1585.92	-3.4929	5.4648e-21	6.3433e-19
ENSGALG00000009446	49.1562	810.231	-4.0429	7.6419e-21	8.8284e-19
ENSGALG00000003862	353.483	1826.9	-2.3697	9.3995e-21	1.0808e-18
ENSGALG00000005043	97.3346	812.538	-3.0614	1.2568e-20	1.4383e-18
ENSGALG00000012416	153.581	5.3059	4.8553	1.317e-20	1.5001e-18
ENSGALG00000030834	134.041	3.27591	5.3546	1.4818e-20	1.6801e-18
ENSGALG00000011270	3871.7	823.735	2.2327	1.6189e-20	1.8269e-18
ENSGALG00000004613	527.365	2649.48	-2.3288	2.3296e-20	2.6168e-18
ENSGALG00000025842	24138.7	152139	-2.656	2.3593e-20	2.6381e-18
ENSGALG00000005087	120.205	2.18362	5.7826	2.431e-20	2.7058e-18
ENSGALG00000040573	134.301	1801.63	-3.7458	2.4801e-20	2.748e-18
ENSGALG00000001977	985.318	16900.3	-4.1003	2.6164e-20	2.8859e-18
ENSGALG00000015701	260.798	15.1228	4.1081	2.8345e-20	3.1124e-18
ENSGALG00000011252	809.536	137.592	2.5567	2.8868e-20	3.1555e-18
ENSGALG00000033118	854.553	61.1233	3.8054	2.9103e-20	3.167e-18
ENSGALG00000027658	205.368	1142.65	-2.4761	3.1486e-20	3.4111e-18
ENSGALG00000043829	114.249	699.125	-2.6134	3.2353e-20	3.4896e-18
ENSGALG00000028424	96.3948	0.3897	7.9504	3.2564e-20	3.4968e-18
ENSGALG00000037332	601.193	2793.56	-2.2162	3.8268e-20	4.0913e-18
ENSGALG00000015013	357.327	37.012	3.2712	3.8946e-20	4.1457e-18
ENSGALG00000009048	163.208	921.795	-2.4977	4.3256e-20	4.5844e-18
Novel00746	228.69	1174.47	-2.3605	4.9658e-20	5.2401e-18
ENSGALG00000007038	500.396	46.7074	3.4213	6.4928e-20	6.8219e-18
ENSGALG00000004397	332.373	1672.05	-2.3307	6.5697e-20	6.856e-18
ENSGALG00000038520	68.8662	808.003	-3.5525	6.5815e-20	6.856e-18
Novel02838	84.9865	530.785	-2.6428	6.6933e-20	6.9428e-18
ENSGALG00000006041	105.895	0.937946	6.8189	6.7491e-20	6.9711e-18
ENSGALG00000027353	273.747	3998.53	-3.8686	7.583e-20	7.7993e-18
ENSGALG00000037802	131.88	0.625298	7.7205	7.7077e-20	7.8943e-18
ENSGALG00000039468	662.904	3754.08	-2.5016	9.0202e-20	9.1999e-18
ENSGALG00000004620	5439.6	24062.7	-2.1452	9.3559e-20	9.5024e-18
ENSGALG00000039696	1240.78	6044.29	-2.2843	9.6066e-20	9.7166e-18
Novel00894	275.187	16.2709	4.08	1.0192e-19	1.0266e-17
ENSGALG00000002597	21.2618	589.751	-4.7938	1.0858e-19	1.0892e-17
ENSGALG00000007570	116.394	2.33749	5.6379	1.1207e-19	1.1196e-17
ENSGALG00000033047	165.964	8.65371	4.2614	1.7999e-19	1.7908e-17
ENSGALG00000037192	2.56835	106.984	-5.3804	2.266e-19	2.2454e-17
ENSGALG00000037557	862.868	4239.16	-2.2966	2.7291e-19	2.6933e-17
ENSGALG00000003521	9790.16	83627.4	-3.0946	3.1792e-19	3.1148e-17
ENSGALG00000041054	556.668	88.9387	2.6459	3.1818e-19	3.1148e-17
ENSGALG00000038311	2659.53	10999.8	-2.0482	3.4165e-19	3.3312e-17
ENSGALG00000015786	267.387	1370.26	-2.3574	3.5538e-19	3.4512e-17
Novel01169	11.3551	174.332	-3.9404	3.7389e-19	3.6166e-17
ENSGALG00000043198	1518.82	8166.72	-2.4268	3.8465e-19	3.706e-17
ENSGALG00000033034	77.3587	532.162	-2.7822	4.0125e-19	3.8356e-17
Novel01195	141.593	5.68997	4.6372	4.011e-19	3.8356e-17
ENSGALG00000005034	2456.01	11268.1	-2.1979	4.0375e-19	3.8445e-17
ENSGALG00000038874	864.548	157.205	2.4593	4.0618e-19	3.8526e-17
ENSGALG00000008821	1027.05	4529.22	-2.1408	4.1826e-19	3.9518e-17
ENSGALG00000000107	319.575	1729.03	-2.4357	4.2966e-19	4.0437e-17
ENSGALG00000003285	547.192	71.358	2.9389	4.8953e-19	4.5895e-17
ENSGALG00000038495	491.855	40.9622	3.5859	5.0354e-19	4.7028e-17
ENSGALG00000010386	513.6	79.4398	2.6927	5.8262e-19	5.4206e-17
ENSGALG00000014984	247.571	25.0079	3.3074	6.4794e-19	6.0054e-17
ENSGALG00000007484	900.048	4644.69	-2.3675	8.6573e-19	7.9936e-17
ENSGALG00000034458	660.483	4711.48	-2.8346	9.5046e-19	8.7428e-17
ENSGALG00000007668	494.876	73.9472	2.7425	1.0827e-18	9.9218e-17
Novel02798	988.022	4336.23	-2.1338	1.1804e-18	1.0776e-16
ENSGALG00000030425	2.28588	101.188	-5.4681	1.3107e-18	1.1922e-16
ENSGALG00000029694	3115.17	12630.1	-2.0195	2.1284e-18	1.9287e-16
ENSGALG00000009719	451.906	49.603	3.1875	2.1797e-18	1.9678e-16
ENSGALG00000005407	965.772	4766.51	-2.3032	2.2124e-18	1.99e-16
ENSGALG00000007646	812.873	5474.52	-2.7516	2.4492e-18	2.1949e-16
ENSGALG00000042388	1714.57	11190.5	-2.7064	3.569e-18	3.1868e-16
ENSGALG00000002621	106.643	825.572	-2.9526	3.6444e-18	3.2422e-16
ENSGALG00000031902	257.491	1252.81	-2.2826	3.8457e-18	3.4088e-16
ENSGALG00000039623	69.2519	539.956	-2.9629	4.0255e-18	3.5553e-16
ENSGALG00000003852	379.279	20.4283	4.2146	4.3705e-18	3.846e-16
ENSGALG00000011889	233.8	16.8498	3.7945	4.4703e-18	3.9197e-16
ENSGALG00000002907	12018.6	159985	-3.7346	5.0226e-18	4.3725e-16
ENSGALG00000006073	109.141	605.56	-2.4721	5.0065e-18	4.3725e-16
ENSGALG00000038631	797.423	21.9149	5.1854	5.0715e-18	4.3994e-16
ENSGALG00000003582	90.0505	0.702349	7.0024	6.5525e-18	5.664e-16
ENSGALG00000029845	684.075	3026.85	-2.1456	7.1998e-18	6.2015e-16
ENSGALG00000034119	900.099	8959.89	-3.3153	7.6471e-18	6.5635e-16
ENSGALG00000003778	1727.05	9431.23	-2.4491	8.1213e-18	6.9332e-16
ENSGALG00000010868	78.1461	0	Inf	8.1346e-18	6.9332e-16
ENSGALG00000042836	59.0389	398.725	-2.7557	9.5781e-18	8.135e-16
ENSGALG00000026875	151.428	1567.96	-3.3722	1.1958e-17	1.0121e-15
ENSGALG00000041801	42.0521	330.919	-2.9762	1.2465e-17	1.0514e-15
ENSGALG00000034236	17.0792	188.053	-3.4608	1.3426e-17	1.1285e-15
ENSGALG00000005017	2.73049	183.101	-6.0673	1.3982e-17	1.1712e-15
ENSGALG00000017168	45.7293	6876.4	-7.2324	1.5036e-17	1.2552e-15
ENSGALG00000042405	55.7831	394.364	-2.8216	1.5087e-17	1.2552e-15
ENSGALG00000043287	403.575	2284.64	-2.5011	1.5674e-17	1.2996e-15
ENSGALG00000035913	3.84432	756.375	-7.6202	1.7569e-17	1.4518e-15
ENSGALG00000037498	393.036	3926.76	-3.3206	1.7944e-17	1.4777e-15
ENSGALG00000001006	274.777	33.3588	3.0421	1.8353e-17	1.5063e-15
ENSGALG00000011447	30.8491	406.941	-3.7215	2.1203e-17	1.7344e-15
ENSGALG00000040062	674.246	4064.47	-2.5917	2.1584e-17	1.7596e-15
ENSGALG00000033766	37.4833	431.972	-3.5266	2.3023e-17	1.8707e-15
ENSGALG00000018700	107.11	788.183	-2.8794	3.7339e-17	3.0238e-15
ENSGALG00000038593	129.851	908.853	-2.8072	4.3336e-17	3.4979e-15
ENSGALG00000013822	422.659	4746.43	-3.4893	4.8194e-17	3.8771e-15
ENSGALG00000014042	401.178	2765.5	-2.7852	4.973e-17	3.9876e-15
ENSGALG00000033002	2999.35	732.707	2.0333	6.3658e-17	5.071e-15
ENSGALG00000032702	2991.62	735.53	2.0241	6.9385e-17	5.5092e-15
ENSGALG00000029017	30.0909	303.108	-3.3324	8.6997e-17	6.8852e-15
ENSGALG00000028308	155.735	8.5811	4.1818	8.9544e-17	7.0638e-15
Novel02529	81.1405	936.898	-3.5294	9.4407e-17	7.4234e-15
ENSGALG00000011796	113.946	3.90097	4.8684	1.0194e-16	7.9898e-15
ENSGALG00000028620	140.184	7.64315	4.197	1.0266e-16	8.0206e-15
ENSGALG00000040736	0	67.3893	#NAME?	1.2131e-16	9.4478e-15
ENSGALG00000008185	144.956	715.143	-2.3026	1.2213e-16	9.4807e-15
ENSGALG00000035350	257.524	32.7324	2.9759	1.3343e-16	1.0325e-14
ENSGALG00000026119	460.857	1884.14	-2.0315	1.3924e-16	1.0741e-14
ENSGALG00000011405	344.213	1490.28	-2.1142	1.5574e-16	1.1976e-14
ENSGALG00000013634	12.3025	690.052	-5.8097	1.6017e-16	1.2278e-14
ENSGALG00000016809	159.286	5.60332	4.8292	1.7167e-16	1.3118e-14
ENSGALG00000042024	1.33488	549.832	-8.6861	1.7952e-16	1.3675e-14
ENSGALG00000030546	204.589	2092.29	-3.3543	1.84e-16	1.3972e-14
ENSGALG00000008084	928.257	3906.88	-2.0734	1.8875e-16	1.4288e-14
ENSGALG00000012873	238.037	4.29067	5.7938	2.1482e-16	1.6212e-14
ENSGALG00000015057	34.1567	330.65	-3.2751	2.1764e-16	1.6374e-14
ENSGALG00000040182	493.667	4307.63	-3.1253	2.1927e-16	1.6446e-14
Novel01299	519.7	10.3755	5.6464	2.3423e-16	1.7514e-14
ENSGALG00000010825	75.8612	0.3897	7.6049	2.4681e-16	1.8399e-14
ENSGALG00000014847	4618.92	29365.5	-2.6685	2.6704e-16	1.9845e-14
ENSGALG00000001620	98.6278	810.744	-3.0392	2.6832e-16	1.988e-14
Novel00662	1227.54	189.6	2.6947	2.697e-16	1.9922e-14
ENSGALG00000032541	8.09217	155.093	-4.2605	3.1628e-16	2.3292e-14
ENSGALG00000008914	246.094	9407.56	-5.2565	3.2557e-16	2.3904e-14
ENSGALG00000009435	146.373	3058.1	-4.3849	3.5511e-16	2.5994e-14
ENSGALG00000010747	490.702	1972.02	-2.0068	3.6605e-16	2.6715e-14
ENSGALG00000006982	309.785	1413.91	-2.1903	4.3902e-16	3.1945e-14
ENSGALG00000016768	277.658	1187.23	-2.0962	4.4915e-16	3.2585e-14
ENSGALG00000005284	133.26	948.501	-2.8314	5.5855e-16	4.0273e-14
ENSGALG00000026605	291.005	1242.37	-2.094	5.6008e-16	4.0273e-14
Novel02874	99.9773	2.88645	5.1142	6.3014e-16	4.5177e-14
ENSGALG00000030124	59.8974	479.025	-2.9995	6.5691e-16	4.6958e-14
ENSGALG00000041775	13.9174	161.607	-3.5375	8.3498e-16	5.9167e-14
ENSGALG00000016281	1650.57	8745.61	-2.4056	9.6678e-16	6.7914e-14
ENSGALG00000008805	215.665	4444.88	-4.3653	9.9344e-16	6.9587e-14
Novel01155	139.815	785.405	-2.4899	1.0362e-15	7.2376e-14
ENSGALG00000019761	100.265	658.543	-2.7155	1.0461e-15	7.2857e-14
Novel01964	11.9172	423.81	-5.1523	1.0955e-15	7.6083e-14
ENSGALG00000031763	377.8	68.3955	2.4656	1.1049e-15	7.6512e-14
ENSGALG00000027471	602.37	2519.64	-2.0645	1.2621e-15	8.7151e-14
Novel01154	140.731	676.653	-2.2655	1.3768e-15	9.4806e-14
ENSGALG00000007324	577.458	76.1803	2.9222	1.4749e-15	1.0127e-13
ENSGALG00000012705	331.406	2144.62	-2.694	1.5879e-15	1.0872e-13
ENSGALG00000005088	309.514	1262.88	-2.0286	1.6493e-15	1.1261e-13
ENSGALG00000042385	39.688	268.086	-2.7559	1.6637e-15	1.1328e-13
ENSGALG00000038813	1680.15	23601.6	-3.8122	2.2255e-15	1.5111e-13
ENSGALG00000029540	84.2806	478.425	-2.505	2.3734e-15	1.607e-13
ENSGALG00000006190	2644.38	59240.9	-4.4856	2.5789e-15	1.7388e-13
ENSGALG00000038362	1088.93	261.557	2.0577	2.8238e-15	1.8962e-13
ENSGALG00000014477	177.843	19.0049	3.2262	3.0016e-15	2.0101e-13
ENSGALG00000010540	132.111	8.42303	3.9713	3.3277e-15	2.2223e-13
Novel02689	27.0127	276.502	-3.3556	3.3749e-15	2.2477e-13
Novel01460	0	379.845	#NAME?	3.7085e-15	2.4632e-13
ENSGALG00000029746	58.7821	333.231	-2.5031	4.0008e-15	2.6501e-13
ENSGALG00000013627	298.651	1205.98	-2.0137	4.0524e-15	2.677e-13
ENSGALG00000002645	140.576	9.75583	3.8489	4.4691e-15	2.9443e-13
ENSGALG00000028810	323.789	1440.5	-2.1534	4.5254e-15	2.9733e-13
ENSGALG00000002638	153.794	2252.28	-3.8723	5.3621e-15	3.5136e-13
ENSGALG00000008491	236.873	1003.66	-2.0831	6.0875e-15	3.9783e-13
Novel01214	68.3101	0.312649	7.7714	6.1572e-15	4.0131e-13
ENSGALG00000000557	159.678	800.573	-2.3259	6.3511e-15	4.1284e-13
Novel01927	8.51856	129.612	-3.9275	7.0528e-15	4.5723e-13
ENSGALG00000006637	136.821	1432.89	-3.3886	7.1375e-15	4.615e-13
ENSGALG00000036212	35.1499	250.542	-2.8335	7.2523e-15	4.6671e-13
ENSGALG00000037152	136.625	730.844	-2.4193	7.2565e-15	4.6671e-13
ENSGALG00000009537	94.6468	468.292	-2.3068	7.797e-15	4.9884e-13
ENSGALG00000036798	5012.04	30747.6	-2.617	8.5302e-15	5.4432e-13
ENSGALG00000003816	59.2853	1991.96	-5.0704	9.2272e-15	5.8727e-13
ENSGALG00000025921	16.4043	159.104	-3.2778	9.3355e-15	5.9261e-13
ENSGALG00000013968	1221.8	7836.35	-2.6812	9.5653e-15	6.0562e-13
Novel02067	181.961	777.616	-2.0954	9.715e-15	6.135e-13
ENSGALG00000013035	45.5219	454.904	-3.3209	9.854e-15	6.2067e-13
ENSGALG00000041870	16.0658	170.064	-3.404	1.0284e-14	6.4609e-13
Novel01080	137.904	9.44763	3.8676	1.1046e-14	6.9215e-13
ENSGALG00000005956	970.955	62.7839	3.9509	1.1204e-14	7.0026e-13
ENSGALG00000031906	71.5092	0.625298	6.8374	1.1607e-14	7.2363e-13
ENSGALG00000005814	121.351	557.237	-2.1991	1.4833e-14	9.1771e-13
ENSGALG00000013709	224.528	914.431	-2.026	1.5506e-14	9.5688e-13
ENSGALG00000007349	75.7561	400.975	-2.4041	1.7109e-14	1.0505e-12
ENSGALG00000009050	178.732	3835.4	-4.4235	1.7716e-14	1.0823e-12
Novel00340	70.5828	0.933028	6.2413	1.9533e-14	1.1903e-12
ENSGALG00000006544	412.89	5924.03	-3.8427	2.1104e-14	1.2829e-12
ENSGALG00000036500	411.148	0.312649	10.361	2.1338e-14	1.2939e-12
ENSGALG00000027316	887.105	0.702349	10.303	2.1737e-14	1.3148e-12
ENSGALG00000008697	32.6536	446.648	-3.7738	2.2643e-14	1.3662e-12
ENSGALG00000029422	222.244	10.8371	4.3581	2.3695e-14	1.4226e-12
ENSGALG00000014912	131.974	1243.35	-3.2359	2.5359e-14	1.5188e-12
ENSGALG00000035393	6.4948	348.018	-5.7437	2.7127e-14	1.6207e-12
ENSGALG00000036915	583.524	134.378	2.1185	2.7294e-14	1.6267e-12
ENSGALG00000035599	2050.66	251.62	3.0268	2.7421e-14	1.6303e-12
ENSGALG00000036316	24.7336	200.886	-3.0218	2.8446e-14	1.6871e-12
ENSGALG00000043787	482.733	2698.37	-2.4828	3.0457e-14	1.802e-12
ENSGALG00000035716	73.3632	1.1691	5.9716	3.0618e-14	1.8071e-12
ENSGALG00000026613	166.992	16.6135	3.3294	3.1088e-14	1.8305e-12
ENSGALG00000040229	810.481	196.843	2.0417	3.6089e-14	2.1197e-12
ENSGALG00000032550	432.219	5074.26	-3.5534	3.6247e-14	2.124e-12
ENSGALG00000007383	1501.32	6773.28	-2.1736	3.821e-14	2.2336e-12
ENSGALG00000009219	42.1489	637.331	-3.9185	4.9199e-14	2.8554e-12
ENSGALG00000008702	76.3848	1.48151	5.6881	5.0269e-14	2.9037e-12
ENSGALG00000039821	107.689	680.824	-2.6604	5.0162e-14	2.9037e-12
ENSGALG00000028759	125.524	9.58674	3.7108	5.309e-14	3.0594e-12
Novel02883	118.08	531.88	-2.1713	5.3427e-14	3.0715e-12
ENSGALG00000017125	287.493	1176.08	-2.0324	5.4121e-14	3.0968e-12
ENSGALG00000001885	296.06	0.625298	8.8871	5.5204e-14	3.1514e-12
ENSGALG00000002125	830.962	8740.18	-3.3948	5.7074e-14	3.2505e-12
ENSGALG00000029606	33.8393	238.762	-2.8188	5.8818e-14	3.3343e-12
ENSGALG00000009700	351.914	4389.78	-3.6409	6.116e-14	3.459e-12
ENSGALG00000007193	165.774	695.395	-2.0686	6.1881e-14	3.4893e-12
Novel01694	139.786	1689.05	-3.5949	6.1982e-14	3.4893e-12
ENSGALG00000027166	5.64453	100.404	-4.1528	7.0589e-14	3.9465e-12
ENSGALG00000041347	717.859	3.35272	7.7422	7.2376e-14	4.0279e-12
ENSGALG00000009995	320.69	2247.33	-2.809	7.2628e-14	4.0328e-12
ENSGALG00000013999	25.3993	291.355	-3.5199	7.6814e-14	4.2458e-12
ENSGALG00000008890	135.839	760.327	-2.4847	8.3771e-14	4.6199e-12
ENSGALG00000042679	36.9714	707.762	-4.2588	8.5946e-14	4.7185e-12
ENSGALG00000014848	159.824	7241.84	-5.5018	8.9293e-14	4.8803e-12
ENSGALG00000034704	317.033	56.6108	2.4855	8.9148e-14	4.8803e-12
Novel00244	1.94125	181.619	-6.5478	8.9905e-14	4.9028e-12
Novel00526	213.235	31.5522	2.7566	1.005e-13	5.4563e-12
ENSGALG00000034107	526.771	3085.1	-2.5501	1.0385e-13	5.6253e-12
ENSGALG00000004376	221.019	1161.3	-2.3935	1.1596e-13	6.2536e-12
ENSGALG00000026557	80.9855	384.529	-2.2474	1.1735e-13	6.3009e-12
Novel00466	54.8017	304.069	-2.4721	1.1732e-13	6.3009e-12
ENSGALG00000027397	168.568	713.196	-2.081	1.1843e-13	6.3446e-12
ENSGALG00000003925	122.634	3351.97	-4.7726	1.2159e-13	6.4997e-12
Novel01930	40.3205	372.402	-3.2073	1.229e-13	6.5553e-12
ENSGALG00000014346	474.203	1904.54	-2.0059	1.3802e-13	7.3297e-12
ENSGALG00000035867	56.7368	0	Inf	1.4179e-13	7.5134e-12
ENSGALG00000008902	17.4645	225.773	-3.6924	1.4442e-13	7.6363e-12
Novel01168	3.97538	97.2793	-4.613	1.5001e-13	7.9146e-12
Novel02589	30.6521	239.861	-2.9681	1.542e-13	8.1006e-12
Novel01926	42.0621	554.484	-3.7206	1.691e-13	8.8267e-12
ENSGALG00000009562	193.948	0.937946	7.6919	1.8907e-13	9.8476e-12
Novel02112	474.674	2503.96	-2.3992	1.9609e-13	1.0192e-11
ENSGALG00000006508	102.915	760.186	-2.8849	1.983e-13	1.0285e-11
ENSGALG00000016299	214.262	10.6734	4.3273	2.0719e-13	1.0723e-11
ENSGALG00000025819	1709.41	7400.62	-2.1141	2.1358e-13	1.103e-11
ENSGALG00000011541	3678.9	31532.6	-3.0995	2.5842e-13	1.3318e-11
Novel01647	671.744	2827.47	-2.0735	2.8284e-13	1.4545e-11
Novel02550	78.1575	2.41501	5.0163	2.9754e-13	1.5269e-11
ENSGALG00000040037	12.6928	134.366	-3.4041	3.0379e-13	1.5555e-11
ENSGALG00000010628	650.319	3108.05	-2.2568	3.3963e-13	1.7248e-11
ENSGALG00000022896	573.195	6.93613	6.3688	3.7781e-13	1.9107e-11
Novel02637	28.8797	205.616	-2.8318	3.807e-13	1.9213e-11
ENSGALG00000002193	125.385	537.713	-2.1005	4.2428e-13	2.1368e-11
ENSGALG00000007257	328.513	3.11173	6.7221	4.3706e-13	2.1967e-11
ENSGALG00000039539	434.989	68.2821	2.6714	4.5068e-13	2.2605e-11
ENSGALG00000006997	314.074	13.954	4.4924	5.0952e-13	2.5399e-11
ENSGALG00000042422	1371.63	213.058	2.6866	6.0152e-13	2.9863e-11
ENSGALG00000016001	59.9963	364.162	-2.6016	6.2052e-13	3.0744e-11
Novel01599	39.5041	300.656	-2.928	6.6639e-13	3.2816e-11
ENSGALG00000005554	241.678	3232.47	-3.7415	7.1589e-13	3.5183e-11
ENSGALG00000037998	472.198	110.766	2.0919	7.5398e-13	3.6906e-11
ENSGALG00000040012	28.8826	264.505	-3.195	7.5723e-13	3.699e-11
ENSGALG00000035933	75.7898	1.87589	5.3364	7.7482e-13	3.7699e-11
ENSGALG00000003802	65.1798	686.395	-3.3965	9.9043e-13	4.8093e-11
ENSGALG00000021972	2256.24	9591.45	-2.0878	1.0305e-12	4.9939e-11
ENSGALG00000016300	26.8006	284.237	-3.4068	1.086e-12	5.2422e-11
ENSGALG00000008204	107.938	756.72	-2.8096	1.1397e-12	5.4796e-11
ENSGALG00000004103	21.4807	162.654	-2.9207	1.1579e-12	5.5561e-11
ENSGALG00000033214	0.485673	100.033	-7.6863	1.1617e-12	5.5634e-11
ENSGALG00000014759	38.7677	219.676	-2.5025	1.1707e-12	5.5954e-11
ENSGALG00000018288	2.25624	83.1509	-5.2037	1.1753e-12	5.6065e-11
ENSGALG00000001918	162.371	1032.62	-2.6689	1.2197e-12	5.8067e-11
ENSGALG00000034652	33.6788	202.833	-2.5904	1.2721e-12	6.0446e-11
ENSGALG00000012382	206.713	1291.04	-2.6428	1.3104e-12	6.2146e-11
ENSGALG00000003841	290.015	11.2221	4.6917	1.3501e-12	6.3777e-11
ENSGALG00000013244	566.514	3130.87	-2.4664	1.3891e-12	6.5368e-11
ENSGALG00000002028	278.621	1461.02	-2.3906	1.4497e-12	6.7959e-11
ENSGALG00000011009	137.794	3.04476	5.5	1.586e-12	7.4061e-11
ENSGALG00000001828	107.492	1200.63	-3.4815	1.7632e-12	8.2181e-11
ENSGALG00000040768	203.191	2.41454	6.3949	1.9675e-12	9.1527e-11
ENSGALG00000032245	35.4273	235.346	-2.7318	2.0031e-12	9.3007e-11
ENSGALG00000033203	943.61	5022.03	-2.412	2.0393e-12	9.4504e-11
ENSGALG00000009089	209.109	2931.69	-3.8094	2.2446e-12	1.0363e-10
ENSGALG00000033516	950.732	231.854	2.0358	2.2823e-12	1.0517e-10
ENSGALG00000038936	1241.85	7378.1	-2.5708	2.3695e-12	1.0898e-10
ENSGALG00000040385	48.408	592.762	-3.6141	2.5831e-12	1.1791e-10
ENSGALG00000042721	1507.13	18.1147	6.3785	2.6893e-12	1.2253e-10
ENSGALG00000029827	1.04206	59.4429	-5.834	2.773e-12	1.2587e-10
ENSGALG00000026536	98.0691	1061.08	-3.4356	2.8146e-12	1.2729e-10
ENSGALG00000031747	498.06	121.776	2.0321	2.925e-12	1.3155e-10
ENSGALG00000010259	92.2681	539.794	-2.5485	2.9575e-12	1.3277e-10
ENSGALG00000035879	657.705	5260.33	-2.9996	3.0593e-12	1.3683e-10
ENSGALG00000014463	7678.52	141647	-4.2053	3.0766e-12	1.3735e-10
Novel00982	66.0332	1.63538	5.3355	3.2144e-12	1.4324e-10
ENSGALG00000041749	48.0498	267.029	-2.4744	3.4516e-12	1.5353e-10
ENSGALG00000005537	30.6167	237.42	-2.9551	3.5099e-12	1.5584e-10
ENSGALG00000042581	89.8549	900.915	-3.3257	3.6963e-12	1.6352e-10
ENSGALG00000013912	98.8703	1.64029	5.9135	3.7731e-12	1.6662e-10
ENSGALG00000037744	988.862	5705.64	-2.5285	3.8621e-12	1.6993e-10
ENSGALG00000036836	102.054	2.33773	5.4481	4.5883e-12	2.0116e-10
ENSGALG00000010960	389.003	86.4075	2.1706	4.7881e-12	2.0954e-10
ENSGALG00000011930	127.146	10.2992	3.6259	4.799e-12	2.0964e-10
ENSGALG00000040904	18.3077	217.759	-3.5722	4.9887e-12	2.1715e-10
ENSGALG00000030526	344.421	79.318	2.1185	5.0313e-12	2.1861e-10
ENSGALG00000000394	49.1468	0	Inf	5.6302e-12	2.4291e-10
ENSGALG00000006480	536.551	36.8635	3.8634	5.9688e-12	2.5615e-10
ENSGALG00000006258	178.696	25.3138	2.8195	6.0172e-12	2.5778e-10
ENSGALG00000003800	486.029	3067.26	-2.6578	6.4436e-12	2.7459e-10
ENSGALG00000041266	813.046	6478.88	-2.9943	6.4395e-12	2.7459e-10
ENSGALG00000016157	9.76026	107.691	-3.4638	6.6946e-12	2.843e-10
Novel00611	263.621	53.9082	2.2899	6.7686e-12	2.8694e-10
ENSGALG00000043372	439.874	21.7892	4.3354	6.8357e-12	2.8928e-10
ENSGALG00000032108	64.0237	1.40446	5.5105	6.8997e-12	2.9149e-10
ENSGALG00000008141	980.43	5147.29	-2.3923	7.6491e-12	3.2259e-10
ENSGALG00000016309	494.98	6477.88	-3.7101	8.0986e-12	3.4036e-10
ENSGALG00000026661	546.958	2820.23	-2.3663	8.1369e-12	3.4139e-10
Novel00799	7.22262	146.623	-4.3434	8.1783e-12	3.4253e-10
ENSGALG00000008536	526.246	4978.91	-3.242	8.2326e-12	3.4421e-10
ENSGALG00000009705	306.227	3891.2	-3.6675	8.3443e-12	3.4769e-10
ENSGALG00000039634	185.66	28.8469	2.6862	8.3327e-12	3.4769e-10
ENSGALG00000034159	60.4548	0.937946	6.0102	8.5659e-12	3.5632e-10
ENSGALG00000006912	72.6791	334.048	-2.2004	9.6099e-12	3.9569e-10
ENSGALG00000019802	212.575	15.0411	3.821	9.6412e-12	3.9631e-10
ENSGALG00000025557	1.82947	59.4089	-5.0212	1.0151e-11	4.1586e-10
ENSGALG00000037460	36.2844	404.58	-3.479	1.019e-11	4.1676e-10
ENSGALG00000027420	177.762	1137.18	-2.6774	1.2677e-11	5.1247e-10
ENSGALG00000016102	371.173	69.8706	2.4093	1.2747e-11	5.1444e-10
ENSGALG00000002675	319.91	15.1071	4.4044	1.5301e-11	6.1246e-10
ENSGALG00000042657	47.2756	0	Inf	1.5582e-11	6.2266e-10
ENSGALG00000028710	94.8961	389.191	-2.0361	1.582e-11	6.3115e-10
ENSGALG00000042446	12.3911	186.371	-3.9108	1.5996e-11	6.3713e-10
ENSGALG00000014182	52.989	258.928	-2.2888	1.642e-11	6.5188e-10
ENSGALG00000035237	255.598	2155.54	-3.0761	1.7049e-11	6.7464e-10
ENSGALG00000009884	9.06352	175.442	-4.2748	1.8819e-11	7.4111e-10
ENSGALG00000014813	70.4264	356.17	-2.3384	2.0236e-11	7.9177e-10
ENSGALG00000029520	53.4558	248.647	-2.2177	2.0717e-11	8.0927e-10
ENSGALG00000029214	342.681	2029.89	-2.5665	2.2144e-11	8.5953e-10
ENSGALG00000002579	513.086	3860.35	-2.9115	2.2468e-11	8.6934e-10
ENSGALG00000042851	44.0166	290.672	-2.7233	2.2465e-11	8.6934e-10
ENSGALG00000037671	26.2052	608.765	-4.538	2.2536e-11	8.7058e-10
ENSGALG00000008367	7585.18	1279.56	2.5675	2.4419e-11	9.4034e-10
ENSGALG00000011792	173.513	30.2152	2.5217	2.5842e-11	9.9359e-10
ENSGALG00000030767	154.494	23.674	2.7062	2.6501e-11	1.0157e-09
Novel02730	387.722	1769.75	-2.1904	2.787e-11	1.0665e-09
Novel02520	430.514	2789.48	-2.6959	3.0894e-11	1.1804e-09
ENSGALG00000004274	2772	236.75	3.5495	3.221e-11	1.2268e-09
ENSGALG00000036759	649.891	157.334	2.0464	3.763e-11	1.4221e-09
ENSGALG00000013568	31.9955	182.848	-2.5147	3.8462e-11	1.4513e-09
Novel02741	20.8593	187.861	-3.1709	4.003e-11	1.5058e-09
ENSGALG00000016301	73.1841	607.977	-3.0544	4.0306e-11	1.5115e-09
ENSGALG00000030556	91.6409	1.87097	5.6141	4.0285e-11	1.5115e-09
Novel02937	45.1786	0	Inf	4.1207e-11	1.543e-09
ENSGALG00000001273	0.859569	49.4231	-5.8454	4.5886e-11	1.7103e-09
ENSGALG00000001347	57.3294	259.741	-2.1797	4.7004e-11	1.748e-09
ENSGALG00000009216	171.388	2173.02	-3.6644	4.7115e-11	1.7481e-09
ENSGALG00000010935	16.4668	129.101	-2.9709	5.0141e-11	1.8547e-09
ENSGALG00000010949	520.319	1.63561	8.3134	5.2873e-11	1.9528e-09
ENSGALG00000000863	572.841	2488.42	-2.119	5.3005e-11	1.9547e-09
Novel00772	1.16275	50.9192	-5.4526	5.5608e-11	2.0476e-09
ENSGALG00000034741	348.279	3444.75	-3.3061	5.6033e-11	2.0601e-09
ENSGALG00000008980	199.87	35.7835	2.4817	5.7636e-11	2.1159e-09
ENSGALG00000010133	2402.13	149.73	4.0039	6.3858e-11	2.3408e-09
ENSGALG00000005739	288.283	50.1521	2.5231	7.5517e-11	2.7598e-09
ENSGALG00000000902	97.7509	8.57666	3.5106	7.7535e-11	2.8293e-09
ENSGALG00000004267	43.6722	0	Inf	7.7895e-11	2.8382e-09
ENSGALG00000035605	92.6638	373.127	-2.0096	8.3326e-11	3.027e-09
ENSGALG00000006775	846.661	3893.01	-2.201	8.4677e-11	3.0715e-09
ENSGALG00000015211	785.755	4155.72	-2.4029	8.9542e-11	3.2336e-09
ENSGALG00000014873	6443.21	1312.8	2.2951	9.1931e-11	3.315e-09
ENSGALG00000038225	129.938	10.6926	3.6031	9.4572e-11	3.4051e-09
ENSGALG00000043435	11.8436	1468.44	-6.954	1.1414e-10	4.0857e-09
ENSGALG00000016127	573.207	3535.27	-2.6247	1.2077e-10	4.2912e-09
ENSGALG00000042362	893.311	14015.4	-3.9717	1.2267e-10	4.3464e-09
ENSGALG00000019157	188.684	5703.23	-4.9177	1.2481e-10	4.4138e-09
ENSGALG00000029734	60.0073	2.02484	4.8893	1.2494e-10	4.4138e-09
ENSGALG00000017122	361.312	1642.33	-2.1844	1.2588e-10	4.4407e-09
Novel00993	12.4929	112.464	-3.1703	1.2705e-10	4.4755e-09
ENSGALG00000007594	366.558	1824.52	-2.3154	1.2766e-10	4.4904e-09
ENSGALG00000031122	259.301	49.0477	2.4024	1.281e-10	4.493e-09
ENSGALG00000030898	135.987	2167.94	-3.9948	1.4423e-10	5.0513e-09
ENSGALG00000029617	1888.93	11.2996	7.3852	1.4618e-10	5.1122e-09
ENSGALG00000033919	60.9719	265.02	-2.1199	1.6613e-10	5.7851e-09
Novel01740	34.3664	184.117	-2.4216	1.7222e-10	5.9885e-09
ENSGALG00000000367	93.7194	8.49469	3.4637	1.7495e-10	6.0747e-09
ENSGALG00000005685	299.175	1337.04	-2.16	1.8478e-10	6.362e-09
Novel03023	438.848	13.7287	4.9985	1.8606e-10	6.3971e-09
Novel01753	50.316	238.489	-2.2448	1.9181e-10	6.5854e-09
ENSGALG00000010049	278.65	1241.89	-2.156	1.9747e-10	6.7702e-09
ENSGALG00000000123	9.62097	98.7751	-3.3599	1.9876e-10	6.8048e-09
ENSGALG00000028091	157.166	756.918	-2.2678	2.1786e-10	7.3963e-09
ENSGALG00000021272	60.8223	329.75	-2.4387	2.4005e-10	8.1044e-09
ENSGALG00000011740	180.439	5333.36	-4.8855	2.6677e-10	8.9569e-09
ENSGALG00000009037	155.261	5.92065	4.7128	2.7095e-10	9.0724e-09
ENSGALG00000012847	96.5849	1731.56	-4.1641	2.923e-10	9.7603e-09
ENSGALG00000006503	908.361	3805.84	-2.0669	3.2938e-10	1.0909e-08
ENSGALG00000031615	123.058	14.1071	3.1248	3.3319e-10	1.1013e-08
ENSGALG00000039562	59.1785	268.233	-2.1803	3.3343e-10	1.1013e-08
ENSGALG00000028801	857.266	4356.72	-2.3454	3.5118e-10	1.1553e-08
ENSGALG00000014988	521.355	2582.59	-2.3085	3.6158e-10	1.1862e-08
ENSGALG00000001621	625.506	2666.2	-2.0917	4.3252e-10	1.4095e-08
ENSGALG00000012644	716.162	24.8435	4.8493	4.9332e-10	1.6034e-08
ENSGALG00000035157	522.002	23.91	4.4484	4.967e-10	1.6122e-08
ENSGALG00000005483	452.879	1848.91	-2.0295	4.985e-10	1.6159e-08
ENSGALG00000040430	235.84	52.6161	2.1642	5.3634e-10	1.7316e-08
ENSGALG00000032687	2096.63	497.682	2.0748	5.3888e-10	1.7375e-08
ENSGALG00000013956	151.607	24.7967	2.6121	5.6435e-10	1.8149e-08
ENSGALG00000021193	200.796	42.0065	2.257	5.7205e-10	1.8372e-08
ENSGALG00000032385	63.8721	774.534	-3.6001	6.0956e-10	1.9474e-08
ENSGALG00000031693	13.4988	103.581	-2.9398	6.54e-10	2.0866e-08
ENSGALG00000015166	141.486	17.9364	2.9797	6.6244e-10	2.1102e-08
Novel00209	8.71601	88.6034	-3.3456	6.7203e-10	2.1358e-08
Novel01533	43.9358	0.312649	7.1347	6.7323e-10	2.1368e-08
Novel03000	30.6988	167.636	-2.4491	6.958e-10	2.2027e-08
ENSGALG00000003886	206.999	1782.09	-3.1059	7.0003e-10	2.2103e-08
ENSGALG00000007448	47.2192	314.734	-2.7367	7.5888e-10	2.3869e-08
ENSGALG00000014624	228.827	32.4155	2.8195	7.6413e-10	2.4003e-08
Novel01652	39.0037	0	Inf	7.6662e-10	2.405e-08
ENSGALG00000012577	135.24	1377.78	-3.3488	8.5937e-10	2.6651e-08
ENSGALG00000029140	4922.07	434.168	3.5029	8.796e-10	2.7141e-08
ENSGALG00000001021	110.057	631.478	-2.5205	9.0782e-10	2.7957e-08
ENSGALG00000003126	48.6238	498.451	-3.3577	9.0835e-10	2.7957e-08
Novel01960	8.2643	86.438	-3.3867	1.0022e-09	3.0808e-08
ENSGALG00000040220	769.686	1.24568	9.2712	1.0148e-09	3.1156e-08
ENSGALG00000003911	79.3446	820.165	-3.3697	1.0211e-09	3.1271e-08
ENSGALG00000015084	181.059	1096.44	-2.5983	1.0287e-09	3.1464e-08
Novel01209	239.7	57.9804	2.0476	1.091e-09	3.3202e-08
ENSGALG00000038848	483.485	6.54666	6.2066	1.1751e-09	3.5627e-08
Novel01416	5.64559	251.825	-5.4792	1.2008e-09	3.636e-08
ENSGALG00000013941	77.6019	528.868	-2.7687	1.2402e-09	3.7414e-08
ENSGALG00000008601	54.3233	2296.77	-5.4019	1.2517e-09	3.7714e-08
ENSGALG00000033461	26.207	716.152	-4.7722	1.3058e-09	3.9249e-08
ENSGALG00000041014	56.564	258.257	-2.1908	1.3076e-09	3.9255e-08
ENSGALG00000006922	4.19893	68.0409	-4.0183	1.3294e-09	3.9858e-08
ENSGALG00000007080	341.003	42.7275	2.9965	1.4241e-09	4.2595e-08
ENSGALG00000023834	972.182	4175.82	-2.1028	1.4903e-09	4.4518e-08
ENSGALG00000001449	281.414	61.4144	2.196	1.5081e-09	4.4997e-08
ENSGALG00000000690	114.945	16.9835	2.7587	1.5523e-09	4.6257e-08
ENSGALG00000036484	397.51	54.0744	2.878	1.5804e-09	4.6979e-08
ENSGALG00000016164	36.1858	174.165	-2.267	1.6918e-09	5.0169e-08
ENSGALG00000001304	77.8259	643.493	-3.0476	1.7175e-09	5.087e-08
ENSGALG00000041097	19.059	119.492	-2.6484	1.7276e-09	5.1108e-08
ENSGALG00000006379	494.667	1.16886	8.7252	1.7786e-09	5.2428e-08
ENSGALG00000010616	397.528	2090.25	-2.3945	1.9007e-09	5.582e-08
Novel01469	49.7221	207.879	-2.0638	2.0446e-09	5.9615e-08
ENSGALG00000029974	4.85423	108.759	-4.4858	2.2374e-09	6.4849e-08
Novel02700	38.9856	210.109	-2.4301	2.2725e-09	6.579e-08
Novel00493	1009.62	67.4862	3.9031	2.3627e-09	6.8157e-08
ENSGALG00000013616	69.8468	4.5265	3.9477	2.3739e-09	6.8318e-08
ENSGALG00000002082	450.088	2333.17	-2.374	2.4295e-09	6.9428e-08
Novel01439	11.4415	324.206	-4.8246	2.8206e-09	7.9763e-08
ENSGALG00000028949	248.067	4597.01	-4.2119	2.9727e-09	8.3772e-08
ENSGALG00000033373	0.971346	44.9505	-5.5322	2.9709e-09	8.3772e-08
ENSGALG00000039311	122.946	1.56324	6.2973	2.9955e-09	8.4318e-08
ENSGALG00000003073	404.362	53.6274	2.9146	3.1507e-09	8.8481e-08
ENSGALG00000002652	81.2822	0	Inf	3.2947e-09	9.2419e-08
Novel01001	3.38829	92.3102	-4.7679	3.3874e-09	9.4692e-08
ENSGALG00000040007	56.6155	232.765	-2.0396	3.5256e-09	9.8216e-08
ENSGALG00000028250	84.2558	8.10499	3.3779	3.5411e-09	9.8538e-08
ENSGALG00000001558	224.425	53.0855	2.0798	3.5992e-09	9.9926e-08
Novel00706	40.193	847.26	-4.3978	3.9504e-09	1.093e-07
ENSGALG00000004044	618.863	15753.7	-4.6699	4.004e-09	1.1041e-07
ENSGALG00000008998	25.0157	185.765	-2.8926	4.3405e-09	1.1928e-07
ENSGALG00000036881	60.1949	248.861	-2.0476	4.4163e-09	1.2109e-07
ENSGALG00000027374	6.04807	70.2903	-3.5388	4.5191e-09	1.2363e-07
Novel02864	12.2511	170.079	-3.7952	4.7935e-09	1.3055e-07
ENSGALG00000032327	113.366	1519.37	-3.7444	4.8139e-09	1.309e-07
ENSGALG00000008486	504.712	2430.26	-2.2676	4.8584e-09	1.3173e-07
ENSGALG00000029799	496.578	0.312649	10.633	4.9596e-09	1.3403e-07
ENSGALG00000006602	117.981	16.0025	2.8822	5.1445e-09	1.3841e-07
ENSGALG00000010645	134.3	605.329	-2.1723	5.1406e-09	1.3841e-07
ENSGALG00000011306	7288.85	30923.7	-2.085	5.1808e-09	1.3924e-07
ENSGALG00000037950	881.735	5155.05	-2.5476	5.3706e-09	1.4402e-07
ENSGALG00000002477	34.5049	241.556	-2.8075	5.3991e-09	1.4462e-07
ENSGALG00000040276	219.3	38.3549	2.5154	5.4311e-09	1.4516e-07
Novel00364	55.8188	306.304	-2.4561	5.4272e-09	1.4516e-07
ENSGALG00000002911	881.269	185.024	2.2519	5.7722e-09	1.536e-07
Novel03287	422.273	101.255	2.0602	5.9106e-09	1.5712e-07
ENSGALG00000010614	1406.6	16402.3	-3.5436	6.0349e-09	1.6025e-07
ENSGALG00000013414	277.405	6802.76	-4.6161	6.4421e-09	1.6977e-07
ENSGALG00000037864	237.251	4040.57	-4.0901	6.5241e-09	1.7174e-07
ENSGALG00000041808	98.7933	917.824	-3.2157	6.572e-09	1.7263e-07
ENSGALG00000038629	327.966	57.1148	2.5216	6.6097e-09	1.7343e-07
ENSGALG00000037233	132.222	7.24854	4.1891	7.48e-09	1.9459e-07
Novel01933	15.7362	105.348	-2.743	7.6919e-09	1.9989e-07
ENSGALG00000038584	41.8438	0.7794	5.7465	8.1918e-09	2.1266e-07
ENSGALG00000009920	33.1825	376.131	-3.5027	8.3937e-09	2.1767e-07
ENSGALG00000010721	67.4244	3.04007	4.4711	8.8914e-09	2.2935e-07
ENSGALG00000000399	52.9512	324.24	-2.6143	8.9521e-09	2.3067e-07
ENSGALG00000041804	154.873	34.1914	2.1794	9.2148e-09	2.3719e-07
Novel00173	97.8208	5.06959	4.2702	9.3567e-09	2.4008e-07
Novel01535	69.031	0.312649	7.7866	9.7951e-09	2.5054e-07
ENSGALG00000038328	11.1144	208.764	-4.2314	1.0154e-08	2.5945e-07
ENSGALG00000012612	17.6414	595.66	-5.0775	1.1037e-08	2.8053e-07
ENSGALG00000035109	222.668	1809.93	-3.023	1.1123e-08	2.8242e-07
ENSGALG00000042402	0	218.438	#NAME?	1.1281e-08	2.8585e-07
ENSGALG00000001709	247.661	2918.53	-3.5588	1.1322e-08	2.8656e-07
ENSGALG00000041373	175.597	40.136	2.1293	1.1787e-08	2.9652e-07
Novel01961	14.2084	137.506	-3.2747	1.19e-08	2.9782e-07
ENSGALG00000031164	87.8862	2.50119	5.1349	1.2719e-08	3.1637e-07
Novel02968	12.3868	90.4362	-2.8681	1.2782e-08	3.1762e-07
ENSGALG00000010377	73.2608	1.64029	5.481	1.331e-08	3.304e-07
Novel00341	33.0114	0	Inf	1.3635e-08	3.3812e-07
ENSGALG00000038752	46.026	1.55833	4.8844	1.3884e-08	3.4325e-07
Novel02034	150.607	11.8568	3.667	1.412e-08	3.4873e-07
ENSGALG00000001662	71.6331	6.39256	3.4862	1.5105e-08	3.7153e-07
ENSGALG00000038373	9.47598	79.2773	-3.0646	1.5246e-08	3.7388e-07
ENSGALG00000010936	336.63	1814.11	-2.43	1.6186e-08	3.9574e-07
ENSGALG00000012783	5047.14	91575.4	-4.1814	1.6791e-08	4.0929e-07
ENSGALG00000016615	101.921	1.94803	5.7093	1.6869e-08	4.1038e-07
Novel02204	623.285	107.726	2.5325	1.6891e-08	4.1051e-07
Novel01360	21.2557	638.327	-4.9084	1.706e-08	4.142e-07
ENSGALG00000037457	135.743	0.312649	8.7621	1.7111e-08	4.1503e-07
ENSGALG00000006198	689.518	163.686	2.0747	1.7564e-08	4.2559e-07
Novel01843	0	29.5302	#NAME?	1.948e-08	4.7014e-07
ENSGALG00000041101	128.191	21.5341	2.5736	1.9834e-08	4.7679e-07
ENSGALG00000015128	31.402	921.397	-4.8749	2.0654e-08	4.9554e-07
ENSGALG00000014891	138.709	707.906	-2.3515	2.0676e-08	4.9557e-07
ENSGALG00000030782	213.514	52.9541	2.0115	2.0699e-08	4.9557e-07
ENSGALG00000039344	435.168	4.37216	6.6371	2.125e-08	5.0684e-07
ENSGALG00000036566	558.748	2426.89	-2.1188	2.1429e-08	5.1061e-07
ENSGALG00000026896	144.628	647.754	-2.1631	2.1772e-08	5.1826e-07
ENSGALG00000029812	57.2271	3.74242	3.9347	2.2703e-08	5.3939e-07
ENSGALG00000000407	53.4433	214.89	-2.0075	2.2728e-08	5.3945e-07
ENSGALG00000018287	16.3872	248.655	-3.9235	2.4022e-08	5.6739e-07
Novel00134	19.0976	175.072	-3.1965	2.583e-08	6.0599e-07
ENSGALG00000034716	175.378	40.7608	2.1052	2.7316e-08	6.4025e-07
ENSGALG00000034795	79.8516	4.6703	4.0957	2.9565e-08	6.8964e-07
ENSGALG00000026081	1454.94	6314.08	-2.1176	3.1935e-08	7.4138e-07
ENSGALG00000012613	239.794	45.3587	2.4023	3.238e-08	7.5099e-07
ENSGALG00000035120	7.09012	68.8976	-3.2806	3.307e-08	7.6481e-07
ENSGALG00000009024	347.534	2541.42	-2.8704	3.3453e-08	7.722e-07
Novel02711	0.242837	63.0308	-8.0199	3.4213e-08	7.8826e-07
ENSGALG00000008439	437.168	3035.05	-2.7955	3.4387e-08	7.9081e-07
Novel01327	6.03733	124.602	-4.3673	3.4389e-08	7.9081e-07
ENSGALG00000000529	1482.56	354.241	2.0653	3.571e-08	8.2042e-07
ENSGALG00000040559	42.5424	175.133	-2.0415	3.7433e-08	8.5839e-07
ENSGALG00000034305	38.8252	171.44	-2.1426	3.9021e-08	8.9312e-07
ENSGALG00000042365	94.1843	12.6406	2.8974	4.0266e-08	9.1731e-07
ENSGALG00000039977	5803.03	53942.6	-3.2165	4.0753e-08	9.2667e-07
ENSGALG00000039970	67.3024	5.93073	3.5044	4.1224e-08	9.365e-07
Novel00044	66.0804	350.124	-2.4056	4.1386e-08	9.3861e-07
ENSGALG00000007488	1027.71	55.9265	4.1998	4.1561e-08	9.4154e-07
Novel00047	4.07679	56.1366	-3.7834	4.6841e-08	1.0563e-06
ENSGALG00000016144	38.7299	0.625298	5.9528	4.9963e-08	1.1225e-06
ENSGALG00000006389	87.5092	373.906	-2.0952	5.0388e-08	1.13e-06
ENSGALG00000039687	69.7554	7.71061	3.1774	5.243e-08	1.1747e-06
ENSGALG00000042257	309.85	21791.2	-6.136	5.6138e-08	1.2531e-06
ENSGALG00000010931	18.2452	126.866	-2.7977	5.7663e-08	1.2828e-06
ENSGALG00000032845	1.45702	148.085	-6.6673	5.9726e-08	1.3247e-06
ENSGALG00000023936	363.023	36.2764	3.323	5.9832e-08	1.3259e-06
ENSGALG00000033829	31.6637	140.742	-2.1522	6.1717e-08	1.3664e-06
Novel01022	1.76913	51.0208	-4.85	6.2705e-08	1.3858e-06
ENSGALG00000043415	45.4436	1.71711	4.726	6.519e-08	1.4394e-06
ENSGALG00000005360	7.08906	92.943	-3.7127	6.6471e-08	1.4663e-06
ENSGALG00000000839	1315.23	126.229	3.3812	6.6762e-08	1.4714e-06
Novel00108	34.5209	0.312649	6.7868	7.3482e-08	1.6122e-06
Novel00832	78.1879	8.96073	3.1253	7.6503e-08	1.674e-06
ENSGALG00000005292	597.004	3020.76	-2.3391	8.1106e-08	1.7652e-06
ENSGALG00000035619	7.91967	71.548	-3.1754	8.5192e-08	1.8475e-06
ENSGALG00000015453	157.902	934.741	-2.5655	8.9399e-08	1.9319e-06
ENSGALG00000033971	854.306	192.341	2.1511	9.622e-08	2.0701e-06
ENSGALG00000003904	94.7678	13.661	2.7943	9.656e-08	2.0756e-06
ENSGALG00000013641	14.9059	90.9539	-2.6093	9.8983e-08	2.124e-06
ENSGALG00000040113	2.98187	46.1529	-3.9521	9.9223e-08	2.1272e-06
Novel00670	62.4941	0.625298	6.643	1.0058e-07	2.1487e-06
Novel00276	107.667	18.3283	2.5544	1.0086e-07	2.151e-06
ENSGALG00000000003	131.939	27.052	2.2861	1.0145e-07	2.1617e-06
ENSGALG00000040771	30.4327	177.372	-2.5431	1.0572e-07	2.2428e-06
ENSGALG00000008909	239.159	1822.85	-2.9302	1.0616e-07	2.2483e-06
ENSGALG00000015628	103.83	12.7753	3.0228	1.063e-07	2.2492e-06
ENSGALG00000030792	56.8137	507.474	-3.159	1.0736e-07	2.2698e-06
Novel01342	2.49908	95.3131	-5.2532	1.1116e-07	2.342e-06
Novel02141	122.206	25.7923	2.2443	1.1691e-07	2.461e-06
ENSGALG00000043764	44.0802	2.10189	4.3904	1.1743e-07	2.4676e-06
ENSGALG00000030064	247.288	1096.14	-2.1482	1.2016e-07	2.5206e-06
ENSGALG00000007186	226.356	49.5775	2.1908	1.2444e-07	2.606e-06
Novel00544	41.8614	1.4047	4.8973	1.2678e-07	2.6528e-06
ENSGALG00000042961	402.389	96.4825	2.0603	1.2758e-07	2.6627e-06
ENSGALG00000002988	3368.22	809.133	2.0575	1.2971e-07	2.7002e-06
ENSGALG00000015301	186.38	872.825	-2.2274	1.2998e-07	2.7033e-06
ENSGALG00000016105	1732.99	8611.07	-2.3129	1.3299e-07	2.7637e-06
Novel00512	2.44765	45.7306	-4.2237	1.3513e-07	2.8033e-06
ENSGALG00000036786	20.7768	260.42	-3.6478	1.3808e-07	2.8597e-06
Novel01997	151.968	28.7506	2.4021	1.5086e-07	3.1059e-06
ENSGALG00000041729	12.946	85.8303	-2.729	1.5103e-07	3.1068e-06
ENSGALG00000015655	35.0831	150.715	-2.103	1.5305e-07	3.1456e-06
Novel01672	8.43536	70.2859	-3.0587	1.5478e-07	3.1731e-06
ENSGALG00000039209	612.31	36.8216	4.0556	1.5558e-07	3.1869e-06
ENSGALG00000040781	24.9875	116.421	-2.2201	1.5725e-07	3.2184e-06
Novel00908	850.596	210.723	2.0131	1.6357e-07	3.3422e-06
ENSGALG00000033187	6.82512	93.6828	-3.7789	1.6749e-07	3.4165e-06
ENSGALG00000039001	870.23	4054.72	-2.2201	1.719e-07	3.5006e-06
ENSGALG00000034895	32.9068	141.363	-2.1029	1.7601e-07	3.5784e-06
ENSGALG00000012712	5063.87	21168.9	-2.0636	1.7669e-07	3.5892e-06
Novel01072	156.027	0.779163	7.6457	1.772e-07	3.5965e-06
ENSGALG00000000824	14.9669	91.8823	-2.618	1.8056e-07	3.6555e-06
ENSGALG00000017029	19.4804	156.6	-3.007	1.8863e-07	3.8095e-06
Novel01487	54.139	374.639	-2.7908	1.9002e-07	3.8343e-06
Novel00794	52.6805	270.046	-2.3579	1.9028e-07	3.8364e-06
ENSGALG00000029719	0.971346	34.7792	-5.1621	1.9607e-07	3.9434e-06
ENSGALG00000033491	37.5718	0.3897	6.5911	1.9968e-07	4.0128e-06
ENSGALG00000024470	307.26	1623.81	-2.4019	2.0514e-07	4.1081e-06
ENSGALG00000036010	28.5947	138.811	-2.2793	2.0548e-07	4.109e-06
Novel00667	48.4058	2.80916	4.107	2.0883e-07	4.1725e-06
ENSGALG00000007864	4.37854	53.378	-3.6077	2.2572e-07	4.499e-06
ENSGALG00000036021	16.5454	117.431	-2.8273	2.4068e-07	4.7621e-06
ENSGALG00000023584	9.74952	74.0246	-2.9246	2.443e-07	4.8297e-06
ENSGALG00000016313	312.698	1342.51	-2.1021	2.4474e-07	4.8346e-06
ENSGALG00000037352	56.3711	0	Inf	2.4589e-07	4.8534e-06
ENSGALG00000003401	332.353	1477.56	-2.1524	2.5043e-07	4.9349e-06
ENSGALG00000014943	91.0107	16.2772	2.4832	2.5837e-07	5.0831e-06
Novel01607	0	36.7804	#NAME?	2.6201e-07	5.1506e-06
Novel01142	63.5451	1.4047	5.4994	2.7446e-07	5.378e-06
ENSGALG00000033715	0.556383	37.7233	-6.0832	2.7478e-07	5.38e-06
ENSGALG00000032478	77.1926	373.308	-2.2738	2.8065e-07	5.486e-06
ENSGALG00000011285	606.954	2587.56	-2.0919	2.8159e-07	5.5e-06
Novel00960	72.6534	6.70005	3.4388	2.9341e-07	5.708e-06
ENSGALG00000030871	208.716	2269.76	-3.4429	3.0938e-07	5.9995e-06
ENSGALG00000030316	35.3348	149.687	-2.0828	3.3338e-07	6.4088e-06
ENSGALG00000023083	24.5422	120.401	-2.2945	3.3776e-07	6.4828e-06
ENSGALG00000001171	968.411	4069.21	-2.0711	3.4158e-07	6.5511e-06
ENSGALG00000038884	1669.88	10268	-2.6203	3.5267e-07	6.7479e-06
ENSGALG00000039390	80.9923	11.6982	2.7915	3.5601e-07	6.8011e-06
ENSGALG00000005655	345.265	26.6686	3.6945	3.6516e-07	6.9595e-06
ENSGALG00000012211	2518.69	10401.1	-2.046	3.9403e-07	7.4747e-06
ENSGALG00000039536	138.764	798.138	-2.524	4.0143e-07	7.6092e-06
ENSGALG00000008554	204.843	16.0851	3.6707	4.1667e-07	7.8674e-06
ENSGALG00000035535	988.228	4004.11	-2.0186	4.2768e-07	8.0627e-06
ENSGALG00000032718	84.8302	14.0933	2.5896	4.8383e-07	9.0583e-06
ENSGALG00000008861	73.9576	10.8319	2.7714	4.8691e-07	9.1089e-06
ENSGALG00000015079	531.879	42.0552	3.6607	5.0302e-07	9.3959e-06
ENSGALG00000006887	29.6107	190.611	-2.6864	5.1642e-07	9.5874e-06
ENSGALG00000013056	11.8832	319.06	-4.7468	5.1617e-07	9.5874e-06
ENSGALG00000000994	179.369	3.82416	5.5516	5.2388e-07	9.7112e-06
ENSGALG00000037349	54.1453	1.79416	4.9155	5.4516e-07	1.006e-05
ENSGALG00000029002	583.345	22.0976	4.7224	5.4884e-07	1.012e-05
ENSGALG00000014681	11.8633	369.078	-4.9594	5.8736e-07	1.0806e-05
Novel01141	73.0646	2.49651	4.8712	6.0644e-07	1.1131e-05
ENSGALG00000035051	79.1404	12.4676	2.6662	6.3162e-07	1.155e-05
ENSGALG00000010204	15.7661	100.526	-2.6727	6.4689e-07	1.1794e-05
ENSGALG00000013993	60.3977	326.149	-2.433	6.9511e-07	1.2645e-05
ENSGALG00000009081	3280.1	27492.4	-3.0672	7.0014e-07	1.2727e-05
ENSGALG00000016388	9.16387	172.723	-4.2364	7.0774e-07	1.2846e-05
Novel02552	90.2366	2.96302	4.9286	7.1013e-07	1.287e-05
ENSGALG00000004343	23.0391	239.081	-3.3753	7.229e-07	1.3072e-05
Novel01250	314.431	6.86844	5.5166	7.3974e-07	1.3367e-05
ENSGALG00000009265	0	23.4494	#NAME?	7.4038e-07	1.3369e-05
ENSGALG00000017167	150.603	31.5064	2.257	7.4639e-07	1.3467e-05
ENSGALG00000026426	101.593	488.67	-2.2661	7.4776e-07	1.3468e-05
ENSGALG00000007917	1318.17	310.16	2.0874	7.5452e-07	1.3564e-05
ENSGALG00000015822	139.826	623.347	-2.1564	7.5723e-07	1.3602e-05
ENSGALG00000038540	21.7899	164.537	-2.9167	7.8987e-07	1.4105e-05
ENSGALG00000002845	58.0872	525.962	-3.1787	8.0967e-07	1.4427e-05
ENSGALG00000010986	231.184	34.1228	2.7602	8.1279e-07	1.4472e-05
Novel00609	12.5807	78.3499	-2.6387	8.3404e-07	1.484e-05
ENSGALG00000016140	34.8984	1.32273	4.7216	8.4476e-07	1.5009e-05
Novel00373	12.199	77.3025	-2.6638	8.9748e-07	1.5796e-05
ENSGALG00000035088	55.6171	6.69537	3.0543	9.7674e-07	1.7129e-05
ENSGALG00000005458	5.86664	159.59	-4.7657	9.7797e-07	1.7138e-05
ENSGALG00000040501	113.289	6.54174	4.1142	9.8582e-07	1.7263e-05
ENSGALG00000041459	1854.48	11552.3	-2.6391	9.9188e-07	1.7345e-05
ENSGALG00000031105	191.349	765.448	-2.0001	1.0116e-06	1.7663e-05
ENSGALG00000002728	53.2679	800.72	-3.91	1.0164e-06	1.7735e-05
ENSGALG00000013356	130.879	31.2696	2.0654	1.0202e-06	1.7789e-05
ENSGALG00000033381	3934.35	3.75179	10.034	1.038e-06	1.806e-05
Novel03136	5.34096	54.8593	-3.3606	1.0657e-06	1.8516e-05
ENSGALG00000042176	7.26331	62.4879	-3.1049	1.0743e-06	1.8651e-05
ENSGALG00000029510	32.1858	0.702349	5.5181	1.0755e-06	1.8659e-05
Novel01036	0.485673	27.9822	-5.8484	1.0971e-06	1.9008e-05
ENSGALG00000037665	117.239	26.9806	2.1195	1.1096e-06	1.9199e-05
ENSGALG00000007562	19.0159	97.3552	-2.3561	1.1455e-06	1.9775e-05
ENSGALG00000001416	14.1991	80.2018	-2.4978	1.2018e-06	2.063e-05
Novel00477	59.0121	7.47969	2.98	1.2753e-06	2.1816e-05
ENSGALG00000005493	342.703	1480.29	-2.1108	1.2788e-06	2.186e-05
ENSGALG00000040088	4.09607	78.1738	-4.2544	1.2842e-06	2.1937e-05
ENSGALG00000038579	4494.6	7.65744	9.1971	1.3653e-06	2.3241e-05
Novel01241	44.8655	3.27567	3.7757	1.3653e-06	2.3241e-05
ENSGALG00000005842	94.5107	4.36257	4.4372	1.377e-06	2.3424e-05
Novel00010	34.5741	0.625298	5.789	1.3791e-06	2.3433e-05
ENSGALG00000018503	1.04206	30.5733	-4.8748	1.3895e-06	2.3571e-05
Novel02825	3.91215	43.8102	-3.4852	1.4131e-06	2.3938e-05
ENSGALG00000004247	14.5038	209.415	-3.8519	1.4475e-06	2.4487e-05
ENSGALG00000021627	137.161	912.503	-2.734	1.4486e-06	2.4487e-05
ENSGALG00000030405	254.757	0	Inf	1.4709e-06	2.483e-05
ENSGALG00000026590	28.4068	119.154	-2.0685	1.5132e-06	2.5473e-05
Novel01211	347.608	19.9714	4.1215	1.5353e-06	2.5811e-05
ENSGALG00000035058	97.1805	18.3362	2.406	1.5486e-06	2.6015e-05
Novel00099	3.5797	70.8142	-4.3061	1.5503e-06	2.6027e-05
ENSGALG00000041047	5.95519	50.2993	-3.0783	1.5604e-06	2.6178e-05
ENSGALG00000009129	885.509	138.257	2.6792	1.6325e-06	2.7294e-05
ENSGALG00000037889	246.712	1336.79	-2.4379	1.654e-06	2.7614e-05
ENSGALG00000005207	427.459	5895.34	-3.7857	1.6554e-06	2.7619e-05
Novel00561	5.18812	81.5565	-3.9745	1.6609e-06	2.7693e-05
ENSGALG00000001028	91.6115	18.0048	2.3471	1.7049e-06	2.8348e-05
ENSGALG00000040445	123.692	6.85416	4.1736	1.7796e-06	2.941e-05
ENSGALG00000005077	21.4285	99.6037	-2.2167	1.7921e-06	2.9596e-05
ENSGALG00000039837	171.703	42.4097	2.0174	1.7985e-06	2.9681e-05
ENSGALG00000014455	38.6745	0.312649	6.9507	1.8093e-06	2.9841e-05
ENSGALG00000008795	123.956	794.47	-2.6802	1.8677e-06	3.074e-05
ENSGALG00000039458	163.18	1513.63	-3.2135	1.9208e-06	3.1594e-05
ENSGALG00000005550	323.309	1330.03	-2.0405	1.9654e-06	3.2262e-05
ENSGALG00000008105	94.6212	1.71735	5.7839	1.9671e-06	3.2268e-05
ENSGALG00000005007	13.3614	120.043	-3.1674	1.9789e-06	3.2439e-05
ENSGALG00000007904	712.037	3226.56	-2.18	2.0025e-06	3.2783e-05
ENSGALG00000035624	17.4189	87.6565	-2.3312	2.192e-06	3.5645e-05
ENSGALG00000041043	48.7012	349.095	-2.8416	2.2747e-06	3.6892e-05
ENSGALG00000001343	218.53	32.6558	2.7424	2.3659e-06	3.8244e-05
ENSGALG00000039571	109.136	23.7138	2.2023	2.4674e-06	3.9753e-05
ENSGALG00000035690	561.15	21.0487	4.7366	2.4769e-06	3.9879e-05
ENSGALG00000015967	81.149	14.5802	2.4766	2.5484e-06	4.0949e-05
ENSGALG00000027096	938.602	6740.74	-2.8443	2.66e-06	4.263e-05
ENSGALG00000016324	262.112	59.5471	2.1381	2.7785e-06	4.4296e-05
Novel02057	4.99527	47.9367	-3.2625	2.8216e-06	4.4807e-05
Novel01463	8.02146	84.1617	-3.3912	2.8409e-06	4.5026e-05
ENSGALG00000029301	334.048	55.8688	2.5799	2.9171e-06	4.6113e-05
ENSGALG00000001319	55.0735	6.31646	3.1242	2.9298e-06	4.6254e-05
ENSGALG00000036119	17.247	80.7044	-2.2263	3.0153e-06	4.7419e-05
ENSGALG00000026768	31.9554	1.09181	4.8713	3.032e-06	4.7621e-05
ENSGALG00000041470	87.6683	379.31	-2.1132	3.1191e-06	4.8894e-05
ENSGALG00000032479	6.47339	53.152	-3.0375	3.1602e-06	4.9412e-05
Novel02767	180.311	792.446	-2.1358	3.1585e-06	4.9412e-05
ENSGALG00000029612	35.313	1.78924	4.3028	3.1649e-06	4.9453e-05
ENSGALG00000012377	179.814	3036.79	-4.078	3.2895e-06	5.1236e-05
ENSGALG00000032994	6.74405	51.3098	-2.9275	3.3206e-06	5.1655e-05
ENSGALG00000040253	5.23063	50.9738	-3.2847	3.3578e-06	5.2134e-05
ENSGALG00000003226	2917.67	14435.1	-2.3067	3.4064e-06	5.277e-05
ENSGALG00000043413	19.9737	115.818	-2.5357	3.4074e-06	5.277e-05
ENSGALG00000041918	480.12	26.5618	4.176	3.5103e-06	5.4259e-05
ENSGALG00000012015	67.7274	3.58388	4.2401	3.5162e-06	5.4315e-05
Novel01868	3.17616	218.461	-6.1039	3.5236e-06	5.4396e-05
ENSGALG00000012594	11.3936	117.869	-3.3709	3.5423e-06	5.4616e-05
ENSGALG00000014695	18.6091	116.88	-2.6509	3.7377e-06	5.7302e-05
ENSGALG00000011917	831.245	5208.99	-2.6477	3.7773e-06	5.7872e-05
ENSGALG00000038308	1.45702	33.0422	-4.5032	3.7916e-06	5.8056e-05
Novel00533	6.88547	78.6696	-3.5142	3.8231e-06	5.8464e-05
Novel00418	6.54266	52.4178	-3.0021	3.8679e-06	5.9001e-05
ENSGALG00000005258	7.41327	57.5422	-2.9564	3.883e-06	5.9194e-05
ENSGALG00000005839	49.0429	4.44922	3.4624	3.9108e-06	5.9581e-05
ENSGALG00000006575	20.9639	120.412	-2.522	3.9523e-06	6.0175e-05
ENSGALG00000034524	10.0231	66.9994	-2.7408	3.9884e-06	6.0688e-05
ENSGALG00000042153	89.1402	19.6351	2.1826	4.0774e-06	6.1849e-05
ENSGALG00000008177	3.33792	41.5456	-3.6377	4.1277e-06	6.2533e-05
Novel01641	295.291	67.2586	2.1343	4.1474e-06	6.2755e-05
ENSGALG00000007179	1.0317	53.7515	-5.7032	4.2259e-06	6.3824e-05
ENSGALG00000012419	35.3319	1.94826	4.1807	4.2425e-06	6.4035e-05
ENSGALG00000009596	27.6812	198.274	-2.8405	4.3177e-06	6.5048e-05
ENSGALG00000007361	374.931	0.7794	8.91	4.3955e-06	6.618e-05
ENSGALG00000010122	245.606	48.5803	2.3379	4.5857e-06	6.8873e-05
Novel03171	22.8169	110.491	-2.2758	4.6061e-06	6.9138e-05
ENSGALG00000034489	93.4445	20.5006	2.1884	4.6468e-06	6.9662e-05
ENSGALG00000005599	99.7966	3.35272	4.8956	4.7299e-06	7.0852e-05
ENSGALG00000036439	30.8512	165.98	-2.4276	4.7385e-06	7.0907e-05
ENSGALG00000037274	44.5383	4.2087	3.4036	4.7951e-06	7.1664e-05
ENSGALG00000016565	67.3107	9.0619	2.893	4.9625e-06	7.403e-05
ENSGALG00000007817	69.815	2.72719	4.6781	5.1268e-06	7.6202e-05
Novel01466	12.9753	73.6494	-2.5049	5.1374e-06	7.6266e-05
ENSGALG00000031073	86.0655	458.25	-2.4126	5.1924e-06	7.6988e-05
ENSGALG00000036160	14.8595	81.3614	-2.453	5.3004e-06	7.8543e-05
ENSGALG00000016562	4.50212	47.6468	-3.4037	5.3418e-06	7.9108e-05
ENSGALG00000007409	74.9315	374.669	-2.322	5.374e-06	7.9392e-05
Novel00182	227.08	44.8819	2.339	5.3839e-06	7.949e-05
Novel01709	1.69841	46.7236	-4.7819	5.4203e-06	7.9979e-05
Novel01135	24.8557	0	Inf	5.4293e-06	8.0063e-05
ENSGALG00000011227	52.8151	6.85416	2.9459	5.5378e-06	8.1597e-05
ENSGALG00000004322	48.1601	5.06959	3.2479	5.584e-06	8.2096e-05
Novel00735	362.882	4.608	6.2992	5.6307e-06	8.2584e-05
Novel00241	34.0738	0.466514	6.1906	5.6682e-06	8.3033e-05
ENSGALG00000004627	37.6785	2.65037	3.8295	5.8291e-06	8.5134e-05
ENSGALG00000028236	2672.99	265.372	3.3324	5.9702e-06	8.6991e-05
Novel00818	3.52933	40.8381	-3.5324	5.9705e-06	8.6991e-05
ENSGALG00000040256	51.3774	6.62324	2.9555	6.079e-06	8.8256e-05
ENSGALG00000029882	106.544	645.156	-2.5982	6.1236e-06	8.8851e-05
ENSGALG00000002008	83.3292	16.6859	2.3202	6.1423e-06	8.9016e-05
ENSGALG00000007666	30.4188	0.937946	5.0193	6.222e-06	9.0117e-05
ENSGALG00000040392	21.802	0	Inf	6.2345e-06	9.0192e-05
ENSGALG00000009415	144.079	34.9926	2.0417	6.2636e-06	9.0558e-05
ENSGALG00000007114	657.382	8910.91	-3.7608	6.4501e-06	9.298e-05
ENSGALG00000008856	218.55	46.6243	2.2288	6.6959e-06	9.6068e-05
ENSGALG00000030929	44.0879	4.13165	3.4156	6.7013e-06	9.6089e-05
ENSGALG00000012089	79.4483	15.5125	2.3566	6.7097e-06	9.6153e-05
ENSGALG00000008055	47.3916	5.2237	3.1815	6.8083e-06	9.7394e-05
ENSGALG00000006864	2074.7	436.718	2.2481	7.2051e-06	0.00010271
ENSGALG00000001862	101.834	21.5215	2.2424	7.2255e-06	0.00010294
ENSGALG00000042784	105.291	501.436	-2.2517	7.3017e-06	0.0001039
ENSGALG00000010837	476.723	2569.81	-2.4304	7.3927e-06	0.00010514
Novel02460	29.7692	1.24568	4.5788	7.5652e-06	0.00010728
ENSGALG00000015136	21.7085	0	Inf	7.9937e-06	0.0001125
ENSGALG00000027897	27.4887	0.625298	5.4582	8.0911e-06	0.00011368
Novel01012	4.25678	39.772	-3.2239	8.112e-06	0.0001139
ENSGALG00000011113	69.1386	10.8516	2.6716	8.18e-06	0.00011473
Novel01825	31.1926	1.24568	4.6462	8.3705e-06	0.00011706
ENSGALG00000038304	1864.6	408.896	2.1891	8.4797e-06	0.00011852
ENSGALG00000039522	16.0993	77.9314	-2.2752	8.8149e-06	0.000123
ENSGALG00000000309	964.698	94.5911	3.3503	8.8494e-06	0.00012335
ENSGALG00000012595	66.6979	345.788	-2.3742	8.9781e-06	0.00012499
ENSGALG00000007416	103.264	18.6292	2.4707	9.002e-06	0.00012518
Novel01973	8.59819	58.6181	-2.7692	9.0094e-06	0.00012521
ENSGALG00000013528	71.1785	12.7854	2.4769	9.3126e-06	0.00012905
ENSGALG00000028924	5082.08	300.308	4.0809	9.4685e-06	0.00013106
ENSGALG00000035777	163.207	928.977	-2.5089	9.4756e-06	0.00013109
ENSGALG00000001450	9.85238	60.6619	-2.6222	9.4951e-06	0.00013121
Novel00331	7.04082	97.1341	-3.7862	9.742e-06	0.00013439
ENSGALG00000010583	244.673	36.9883	2.7257	9.9232e-06	0.00013658
ENSGALG00000006172	819.366	3437.8	-2.0689	1.001e-05	0.00013762
ENSGALG00000031373	24.4275	155.51	-2.6704	1.0274e-05	0.00014109
ENSGALG00000002223	106.605	8.43707	3.6594	1.0372e-05	0.0001422
ENSGALG00000033641	28.5915	1.24568	4.5206	1.0491e-05	0.00014375
ENSGALG00000039238	442.372	108.068	2.0333	1.0522e-05	0.00014409
ENSGALG00000036973	89.2123	562.907	-2.6576	1.1046e-05	0.00015067
ENSGALG00000043739	0.909556	40.8868	-5.4903	1.1167e-05	0.00015216
Novel00135	12.9057	67.5037	-2.387	1.1177e-05	0.0001522
ENSGALG00000034964	421.4	9.36003	5.4925	1.1989e-05	0.00016236
ENSGALG00000035477	48.9596	6.38764	2.9382	1.2497e-05	0.00016868
ENSGALG00000004631	176.163	14.4882	3.604	1.2558e-05	0.00016941
Novel02090	6.45517	52.9012	-3.0348	1.267e-05	0.00017063
Novel01115	78.791	378.797	-2.2653	1.269e-05	0.00017072
ENSGALG00000001079	51.2549	0	Inf	1.2952e-05	0.00017394
ENSGALG00000015094	2.76119	38.5123	-3.802	1.2991e-05	0.00017428
ENSGALG00000017154	35.488	189.033	-2.4132	1.3367e-05	0.00017923
ENSGALG00000006673	335.792	0.625298	9.0688	1.393e-05	0.00018606
ENSGALG00000035694	85.5837	20.0241	2.0956	1.4266e-05	0.00019002
Novel02641	2.98187	58.1206	-4.2848	1.4289e-05	0.00019023
ENSGALG00000042898	233.282	1210.61	-2.3756	1.4469e-05	0.00019231
ENSGALG00000035018	1.58808	35.1596	-4.4686	1.4654e-05	0.00019422
Novel00925	7.93003	54.9429	-2.7925	1.5312e-05	0.0002023
ENSGALG00000029270	1257.9	14.0355	6.4858	1.5425e-05	0.00020368
Novel02025	62.2228	10.9132	2.5114	1.5731e-05	0.00020706
ENSGALG00000030160	2.14446	51.9914	-4.5996	1.6462e-05	0.00021597
Novel00866	0.788859	24.0983	-4.933	1.6664e-05	0.00021804
ENSGALG00000038962	1.11277	25.7349	-4.5315	1.7272e-05	0.00022539
ENSGALG00000000568	68.1813	1.55856	5.4511	1.7335e-05	0.00022609
Novel01670	11.4683	91.9596	-3.0034	1.7431e-05	0.00022717
ENSGALG00000041295	52.1984	236.222	-2.1781	1.7667e-05	0.00022944
ENSGALG00000032110	88.9096	4.05483	4.4546	1.7702e-05	0.00022959
ENSGALG00000040754	67.8913	12.5596	2.4344	1.7957e-05	0.00023234
ENSGALG00000037713	9.34204	53.5614	-2.5194	1.8394e-05	0.00023735
ENSGALG00000003529	306.792	1314.18	-2.0988	1.8491e-05	0.00023823
ENSGALG00000025555	3.26759	38.805	-3.5699	1.8618e-05	0.00023974
ENSGALG00000009270	54.2196	8.02254	2.7567	1.868e-05	0.00024041
ENSGALG00000002864	48.6046	4.75718	3.3529	1.971e-05	0.00025208
ENSGALG00000031754	132.402	556.898	-2.0725	2.1691e-05	0.00027582
Novel00590	0	20.666	#NAME?	2.1946e-05	0.00027834
Novel02971	129.435	18.172	2.8324	2.2347e-05	0.00028283
ENSGALG00000016316	33.4578	2.18386	3.9374	2.2414e-05	0.00028339
ENSGALG00000041442	473.347	1.64029	8.1728	2.2425e-05	0.00028339
ENSGALG00000036399	4.93636	42.6482	-3.111	2.2657e-05	0.00028587
Novel01934	19.5051	108.252	-2.4725	2.3378e-05	0.0002945
Novel00868	2.93188	48.1472	-4.0376	2.4311e-05	0.000305
Novel00947	4.13608	38.1123	-3.2039	2.4666e-05	0.00030929
ENSGALG00000019756	43.2969	0	Inf	2.5095e-05	0.00031386
ENSGALG00000014616	682.022	27.1133	4.6527	2.5749e-05	0.000321
ENSGALG00000027583	18.3174	1946.25	-6.7313	2.5754e-05	0.000321
Novel00516	10.9108	165.292	-3.9212	2.6234e-05	0.0003266
Novel00916	46.7527	0.3897	6.9065	2.6468e-05	0.00032884
ENSGALG00000004373	34.2996	2.26067	3.9234	2.6747e-05	0.00033209
Novel00236	73.6777	507.387	-2.7838	2.6925e-05	0.00033384
ENSGALG00000021443	1152.5	249.557	2.2073	2.7198e-05	0.00033688
ENSGALG00000002804	170.244	25.4794	2.7402	2.7355e-05	0.00033865
ENSGALG00000024136	247.664	0	Inf	2.7698e-05	0.00034235
ENSGALG00000012715	568.065	2324.47	-2.0328	2.7865e-05	0.00034409
ENSGALG00000008671	40.1777	192.211	-2.2582	2.8111e-05	0.00034625
ENSGALG00000009450	889.285	3625.32	-2.0274	2.8313e-05	0.00034839
ENSGALG00000028041	552.367	98.6978	2.4845	2.8394e-05	0.00034903
ENSGALG00000005811	330.318	30.0241	3.4597	2.8737e-05	0.00035289
ENSGALG00000032239	380.127	69.0664	2.4604	2.914e-05	0.00035748
ENSGALG00000005662	291.502	1373.27	-2.236	2.9338e-05	0.00035919
ENSGALG00000015519	435.078	58.5796	2.8928	2.9323e-05	0.00035919
ENSGALG00000039497	178.604	3.67029	5.6047	2.9438e-05	0.00036023
ENSGALG00000034054	6784.09	65.1175	6.703	2.997e-05	0.00036601
ENSGALG00000038303	4.74495	42.7859	-3.1727	3.0339e-05	0.00036996
ENSGALG00000000630	19.2937	0	Inf	3.0633e-05	0.00037335
Novel00137	81.0453	551.563	-2.7667	3.2425e-05	0.00039245
ENSGALG00000032218	40.2486	4.59816	3.1298	3.3201e-05	0.00040084
Novel01379	8.7896	55.7822	-2.6659	3.3227e-05	0.00040096
ENSGALG00000027885	19.0523	0	Inf	3.3328e-05	0.00040178
ENSGALG00000003553	409.927	22.2274	4.205	3.3398e-05	0.00040223
ENSGALG00000042354	54.7321	238.032	-2.1207	3.3585e-05	0.00040428
ENSGALG00000039224	3.24687	35.7626	-3.4613	3.3697e-05	0.00040543
ENSGALG00000035925	431.583	7.81622	5.787	3.3833e-05	0.00040687
ENSGALG00000005171	75.566	17.0657	2.1466	3.4204e-05	0.00041092
Novel01780	9.11389	55.4705	-2.6056	3.6258e-05	0.00043325
ENSGALG00000022815	5.10743	40.7664	-2.9967	3.6643e-05	0.000437
ENSGALG00000029212	15.8665	90.0779	-2.5052	3.6858e-05	0.00043934
Novel01479	1.09204	33.6926	-4.9473	3.7202e-05	0.00044279
ENSGALG00000030129	21.4564	88.0036	-2.0362	3.7451e-05	0.00044532
ENSGALG00000027192	45.5454	2.64546	4.1057	3.8554e-05	0.00045755
Novel01124	21.3207	0.312649	6.0916	3.9035e-05	0.00046258
Novel00031	0	18.1435	#NAME?	4.0508e-05	0.00047788
ENSGALG00000035342	37.1036	3.81924	3.2802	4.1173e-05	0.00048438
ENSGALG00000012470	120.242	22.351	2.4275	4.2027e-05	0.00049371
ENSGALG00000028451	4644.12	781.733	2.5707	4.2169e-05	0.00049443
ENSGALG00000042604	345.789	1560	-2.1736	4.2293e-05	0.00049565
ENSGALG00000010413	31.589	2.26091	3.8044	4.3051e-05	0.00050355
ENSGALG00000013212	103.115	14.0306	2.8776	4.3159e-05	0.00050451
ENSGALG00000003283	239.867	1465.4	-2.611	4.3826e-05	0.00051115
ENSGALG00000032748	12.316	62.3448	-2.3397	4.3913e-05	0.00051143
ENSGALG00000002756	406.739	87.2607	2.2207	4.4715e-05	0.00051978
ENSGALG00000030610	14.8887	87.5628	-2.5561	4.5127e-05	0.00052381
Novel02311	23.8958	0.7794	4.9382	4.5847e-05	0.00053142
ENSGALG00000008442	161.568	16.5795	3.2847	4.6375e-05	0.00053651
Novel02150	6.74799	54.6089	-3.0166	4.7482e-05	0.00054777
ENSGALG00000009274	97.5089	1.39954	6.1225	4.8052e-05	0.00055381
ENSGALG00000000745	141.647	20.8049	2.7673	4.8911e-05	0.00056292
ENSGALG00000015008	19.2637	117.557	-2.6094	4.91e-05	0.00056456
ENSGALG00000029863	324.409	46.7533	2.7947	5.0122e-05	0.00057496
ENSGALG00000032071	83.1732	20.6547	2.0096	5.0325e-05	0.000577
ENSGALG00000004146	28.5843	142.821	-2.3209	5.0555e-05	0.00057902
ENSGALG00000041826	7842.04	1230.31	2.6722	5.2497e-05	0.00059714
ENSGALG00000009739	87.9547	13.4205	2.7123	5.3e-05	0.0006023
ENSGALG00000014221	10.9162	667.243	-5.9337	5.3074e-05	0.00060286
Novel02429	13.3021	66.4058	-2.3197	5.3229e-05	0.00060433
ENSGALG00000038746	83.3266	364.875	-2.1306	5.4687e-05	0.00061944
Novel01865	312.271	17.3034	4.1737	5.5168e-05	0.00062373
ENSGALG00000015599	314.291	29.2253	3.4268	5.5882e-05	0.00063006
ENSGALG00000012117	136.46	562.392	-2.0431	5.6602e-05	0.00063729
ENSGALG00000031860	85.3931	439.836	-2.3648	5.6875e-05	0.00063984
Novel01423	17.6781	0	Inf	5.753e-05	0.00064595
ENSGALG00000042652	1.64843	53.0068	-5.007	5.827e-05	0.00065395
ENSGALG00000041640	1105.07	182.04	2.6018	5.8938e-05	0.00066085
ENSGALG00000036178	19.0277	78.8208	-2.0505	5.9157e-05	0.00066268
ENSGALG00000042045	270.912	41.6844	2.7002	5.9136e-05	0.00066268
ENSGALG00000005413	459.173	28.7152	3.9992	5.9328e-05	0.0006643
ENSGALG00000008040	71.4578	309.258	-2.1136	6.0084e-05	0.00067122
Novel01166	19.1819	0	Inf	6.1325e-05	0.00068383
ENSGALG00000035829	8.10216	51.1206	-2.6575	6.1656e-05	0.0006869
ENSGALG00000002389	987.721	204	2.2755	6.1757e-05	0.00068739
ENSGALG00000041932	47.4637	0.7794	5.9283	6.1812e-05	0.00068769
ENSGALG00000032444	416.729	101.358	2.0396	6.2055e-05	0.00068976
ENSGALG00000002479	2966.44	12100.1	-2.0282	6.2826e-05	0.00069769
ENSGALG00000034222	20.4318	0.466514	5.4528	6.5276e-05	0.0007226
ENSGALG00000004526	52.7253	1.71243	4.9444	6.531e-05	0.00072265
ENSGALG00000043582	403.587	12.9678	4.9599	6.631e-05	0.00073173
ENSGALG00000040447	294.497	14.9695	4.2982	6.6763e-05	0.00073577
ENSGALG00000009405	68.5099	15.8203	2.1145	6.748e-05	0.00074195
ENSGALG00000033700	29.1501	5895.6	-7.66	6.8444e-05	0.00075187
ENSGALG00000017347	263.299	19.7105	3.7397	6.9999e-05	0.00076687
Novel01817	13.5428	90.4912	-2.7403	7.1201e-05	0.00077864
ENSGALG00000001234	32.4008	170.388	-2.3947	7.1301e-05	0.00077903
Novel03241	14.0388	65.4528	-2.221	7.154e-05	0.00078094
ENSGALG00000007419	908.036	59.1042	3.9414	7.3563e-05	0.00080159
Novel01674	27.9598	121.628	-2.121	7.3815e-05	0.00080363
ENSGALG00000000154	200.315	21.2601	3.236	7.5365e-05	0.00081795
Novel00107	14.5177	142.62	-3.2963	7.8635e-05	0.00084965
ENSGALG00000042091	1.77057	40.8125	-4.5267	7.9056e-05	0.00085382
ENSGALG00000029364	44.0383	1507.7	-5.0975	8.0417e-05	0.0008666
ENSGALG00000034392	47.1489	8.02254	2.5551	8.1692e-05	0.00087917
ENSGALG00000034214	81.513	11.7893	2.7895	8.735e-05	0.00093511
ENSGALG00000038787	16.0075	92.0711	-2.524	8.7633e-05	0.00093732
Novel00840	52.5043	10.361	2.3413	8.8124e-05	0.00094174
ENSGALG00000012200	129.719	25.8262	2.3285	8.9717e-05	0.000955
ENSGALG00000029144	44.7732	0.933028	5.5846	8.9981e-05	0.00095739
ENSGALG00000029451	16.746	0	Inf	9.4696e-05	0.0010036
Novel02978	2.84227	30.3963	-3.4188	9.5634e-05	0.0010131
Novel01814	20.07	0.3897	5.6865	9.5962e-05	0.0010161
ENSGALG00000011166	61.8055	3.58364	4.1082	9.8296e-05	0.0010382
ENSGALG00000016904	259.769	8.50032	4.9336	0.00010086	0.001063
ENSGALG00000035191	53.2208	9.75044	2.4485	0.00010116	0.0010656
ENSGALG00000014227	81.1396	19.3264	2.0698	0.00010174	0.0010708
ENSGALG00000012869	229.334	0.312649	9.5187	0.00010209	0.0010726
Novel00346	17.6435	731.155	-5.373	0.00010615	0.00111
ENSGALG00000010866	83.7066	4.20894	4.3138	0.00011136	0.0011566
ENSGALG00000002944	57.1033	535.451	-3.2291	0.00011161	0.0011587
Novel01312	111.599	17.9463	2.6366	0.00011173	0.0011595
Novel01653	16.7142	0	Inf	0.00011252	0.0011666
ENSGALG00000041805	48.3611	0.466514	6.6958	0.00011282	0.0011683
ENSGALG00000006421	23.6437	107.904	-2.1902	0.00011795	0.0012188
ENSGALG00000003647	32.9771	2.72743	3.5959	0.0001208	0.001245
ENSGALG00000031892	46.8567	7.48905	2.6454	0.00012078	0.001245
ENSGALG00000031004	35.1445	4.05531	3.1154	0.00012249	0.0012609
ENSGALG00000016455	57.3223	13.2374	2.1145	0.00012735	0.0013054
ENSGALG00000020827	23.8115	1.09181	4.4469	0.00012976	0.0013267
Novel01008	201.028	11.0774	4.1817	0.00013238	0.0013524
ENSGALG00000007441	53.1115	10.6739	2.3149	0.0001329	0.001356
ENSGALG00000012989	53.9489	258.008	-2.2577	0.00013287	0.001356
Novel01862	21.6228	95.0913	-2.1368	0.00013537	0.0013801
Novel01624	61.4481	0.702349	6.451	0.00013618	0.0013872
Novel01815	98.0079	0	Inf	0.00013662	0.0013911
Novel00395	13.8281	61.202	-2.146	0.00013859	0.0014088
Novel02486	75.7498	18.5674	2.0285	0.00013981	0.0014188
Novel01899	60.573	12.9439	2.2264	0.00014079	0.0014282
Novel01009	12.6232	55.0574	-2.1249	0.00014635	0.0014741
Novel02095	62.5764	15.343	2.028	0.00014879	0.0014956
ENSGALG00000012095	2.75083	34.8921	-3.665	0.00014975	0.001504
ENSGALG00000020486	38.3738	0	Inf	0.00015026	0.001508
ENSGALG00000000894	5313.11	517.979	3.3586	0.00015041	0.0015088
ENSGALG00000028095	66.576	15.6723	2.0868	0.00015213	0.0015248
Novel00221	58.4099	13.247	2.1406	0.00015346	0.0015368
ENSGALG00000019715	67.588	7.16752	3.2372	0.00015537	0.001554
ENSGALG00000009495	2269.36	308.541	2.8788	0.00015607	0.0015592
ENSGALG00000023904	3419.8	610.712	2.4853	0.00015904	0.0015823
Novel00301	2.91404	30.8729	-3.4052	0.0001592	0.001583
ENSGALG00000019304	80.6763	0	Inf	0.00016029	0.0015903
ENSGALG00000032233	15.1201	64.7601	-2.0986	0.00016891	0.0016643
Novel02962	53.34	8.80805	2.5983	0.00017074	0.0016802
ENSGALG00000018415	2063.31	14.4589	7.1569	0.00017085	0.0016806
ENSGALG00000032099	0.606371	18.1681	-4.9051	0.00017232	0.0016923
Novel02092	26.9408	0	Inf	0.00017331	0.001698
Novel02693	31.289	3.66045	3.0956	0.00017695	0.0017309
ENSGALG00000041864	24.3254	1.5588	3.964	0.00017748	0.0017339
Novel01237	66.761	13.8238	2.2719	0.00018393	0.0017877
ENSGALG00000001857	53.3107	11.375	2.2286	0.00019939	0.0019241
ENSGALG00000014994	878.579	31.9227	4.7825	0.00020155	0.0019427
ENSGALG00000040893	59.0221	348.087	-2.5601	0.00020349	0.0019598
ENSGALG00000036923	81.1077	7.55674	3.424	0.0002044	0.001967
Novel01045	70.8901	14.2779	2.3118	0.00020981	0.0020119
ENSGALG00000006807	8.38644	57.8834	-2.787	0.00021039	0.0020167
ENSGALG00000034083	504.595	2144.93	-2.0877	0.00021263	0.002035
ENSGALG00000038705	18.1227	0.466514	5.2797	0.00021542	0.0020576
ENSGALG00000029445	94.9466	5.54126	4.0988	0.00022387	0.0021334
Novel01685	21.0614	97.776	-2.2149	0.0002265	0.0021567
ENSGALG00000010983	58.5578	13.3287	2.1353	0.0002274	0.002161
ENSGALG00000012886	35.0684	4.5984	2.931	0.00023035	0.0021839
Novel00652	9.05316	46.7896	-2.3697	0.0002322	0.0021965
ENSGALG00000030774	4.9542	34.1469	-2.785	0.00023376	0.0022086
ENSGALG00000027494	39.224	6.0811	2.6893	0.00023456	0.0022153
Novel03290	12.3453	55.4904	-2.1683	0.00023551	0.0022217
ENSGALG00000008456	62.6817	8.88462	2.8187	0.00024272	0.0022809
Novel00759	16.8696	0	Inf	0.00024462	0.002297
ENSGALG00000029529	15.1726	222.749	-3.8759	0.0002453	0.0023024
ENSGALG00000010473	70.4339	2.02531	5.1201	0.00024622	0.0023075
Novel00693	5.82808	78.5266	-3.7521	0.00025168	0.002356
ENSGALG00000035054	46.6977	8.73076	2.4192	0.00025411	0.002375
Novel00358	61.2828	6.78179	3.1757	0.00026391	0.0024564
ENSGALG00000039822	45.1329	8.34035	2.436	0.00026778	0.0024857
Novel01464	11.4108	54.637	-2.2595	0.0002745	0.0025365
Novel01517	41.4432	195.941	-2.2412	0.00029758	0.002727
ENSGALG00000009638	864.16	4114.2	-2.2512	0.00030018	0.0027487
ENSGALG00000016826	2531.41	11731.6	-2.2124	0.00030044	0.0027496
ENSGALG00000034593	2.69048	28.126	-3.386	0.00030305	0.0027697
ENSGALG00000035055	95.9604	16.3877	2.5498	0.00030336	0.0027697
Novel01966	21.4571	93.5561	-2.1244	0.00030742	0.0028014
ENSGALG00000037862	379.398	21.2808	4.1561	0.00030901	0.0028117
Novel01819	2.92152	26.8991	-3.2028	0.0003089	0.0028117
ENSGALG00000042747	19.5005	0.625298	4.9628	0.00032234	0.0029112
Novel02707	2.61833	25.4213	-3.2793	0.0003404	0.0030562
ENSGALG00000036281	286.13	8.57642	5.0602	0.00034152	0.003064
ENSGALG00000037573	0	195.087	#NAME?	0.00035478	0.0031701
Novel00857	1.39523	74.2791	-5.7344	0.00035507	0.0031715
ENSGALG00000023640	67.4806	5.45461	3.6289	0.00035551	0.0031743
ENSGALG00000038950	9.05172	44.2196	-2.2884	0.00035848	0.003195
ENSGALG00000043139	215.741	34.0942	2.6617	0.00036074	0.0032105
ENSGALG00000025817	40.2375	5.53166	2.8628	0.00036881	0.0032716
Novel01629	4.82458	34.6778	-2.8455	0.0003767	0.0033354
ENSGALG00000030409	4.95564	35.0104	-2.8206	0.00037947	0.0033538
ENSGALG00000038218	40.8807	7.94081	2.3641	0.00039492	0.0034753
ENSGALG00000001418	0.242837	15.3496	-5.9821	0.00040517	0.0035559
ENSGALG00000013454	13.6353	66.9252	-2.2952	0.00040925	0.0035872
Novel01911	11.3583	198.505	-4.1274	0.00041007	0.0035918
ENSGALG00000023355	53.0507	13.1647	2.0107	0.00042116	0.0036732
ENSGALG00000031826	2137.16	14729.2	-2.7849	0.00043199	0.0037541
ENSGALG00000041681	50.4039	12.2266	2.0435	0.00043713	0.0037933
ENSGALG00000036460	311.284	41.7329	2.899	0.00044589	0.0038584
ENSGALG00000005123	87.7471	1.63538	5.7457	0.00044957	0.0038861
Novel00773	39.8034	3.58856	3.4714	0.00045067	0.0038928
ENSGALG00000040530	3.45862	28.9232	-3.064	0.00045514	0.0039231
ENSGALG00000013094	0.930279	57.5405	-5.9508	0.00045657	0.003934
ENSGALG00000036082	51.9484	0	Inf	0.00045878	0.0039461
ENSGALG00000043341	48.2933	0.3897	6.9533	0.00045939	0.0039486
ENSGALG00000006273	274.35	1471.81	-2.4235	0.00046391	0.0039804
ENSGALG00000005747	99.189	439.43	-2.1474	0.00046861	0.0040193
ENSGALG00000033707	8.44679	43.3507	-2.3596	0.0004808	0.0041079
Novel00669	51.6213	2.96794	4.1204	0.00048078	0.0041079
ENSGALG00000010198	14.2084	0	Inf	0.00048248	0.0041195
Novel02032	36.2265	1.09181	5.0522	0.00049184	0.0041891
Novel03037	22.0863	1.48175	3.8978	0.00049746	0.0042281
ENSGALG00000012298	40.2101	6.7867	2.5668	0.00050434	0.0042746
ENSGALG00000004239	3140.52	728.54	2.1079	0.00050491	0.0042779
Novel01536	1060.29	20.0095	5.7276	0.00050594	0.0042852
ENSGALG00000033860	13.9149	0	Inf	0.00050697	0.0042924
Novel00756	20.3918	125.384	-2.6203	0.00051148	0.0043201
Novel01616	0.313547	14.8062	-5.5614	0.00051581	0.0043507
ENSGALG00000033331	29.9638	3.97334	2.9148	0.00052186	0.004394
ENSGALG00000043805	28.6115	3.50659	3.0285	0.00053913	0.004513
ENSGALG00000007508	89.9597	11.6207	2.9526	0.00054547	0.0045507
ENSGALG00000036426	26.9498	230.545	-3.0967	0.00054534	0.0045507
ENSGALG00000028858	532.147	89.171	2.5772	0.00054829	0.0045671
Novel01921	2.57871	36.9294	-3.84	0.00054963	0.0045757
ENSGALG00000037321	42.5409	258.589	-2.6037	0.00055364	0.0046044
Novel00222	171.184	27.5335	2.6363	0.00055889	0.0046401
ENSGALG00000001936	4.76424	32.3588	-2.7638	0.00055926	0.0046416
ENSGALG00000042619	9.36671	88.2323	-3.2357	0.00056045	0.0046483
Novel01992	29.7293	461.61	-3.9567	0.0005617	0.0046529
ENSGALG00000038771	39.6798	1058.74	-4.7378	0.00056581	0.0046816
ENSGALG00000004721	13.2496	53.4818	-2.0131	0.00057424	0.0047417
ENSGALG00000016744	28.0176	0.7794	5.1678	0.00057859	0.0047744
ENSGALG00000005421	84.8053	14.0313	2.5955	0.00057968	0.0047818
Novel00504	7.86968	42.0133	-2.4165	0.00058366	0.0048065
ENSGALG00000026214	8.95136	203.283	-4.5052	0.00058805	0.0048394
ENSGALG00000014501	33.8146	4.2183	3.0029	0.0005905	0.0048563
ENSGALG00000039694	16.0571	0	Inf	0.00059239	0.0048702
Novel00259	31.1537	4.74735	2.7142	0.00059392	0.0048799
ENSGALG00000037608	88.8887	10.6781	3.0573	0.0005973	0.0049023
ENSGALG00000037548	37.0736	0.466514	6.3123	0.00060182	0.0049344
ENSGALG00000039220	3.0451	27.0574	-3.1515	0.00060373	0.0049437
Novel01931	12.035	50.1356	-2.0586	0.00060425	0.004946
ENSGALG00000021647	120.553	26.6878	2.1754	0.00063217	0.0051555
ENSGALG00000039154	21.1714	109.374	-2.3691	0.00063721	0.0051861
Novel01039	68.2403	6.15696	3.4703	0.00063896	0.0051987
Novel01639	42.511	8.18322	2.3771	0.0006397	0.005203
ENSGALG00000034094	70.6807	7.01294	3.3332	0.00064218	0.0052196
ENSGALG00000002132	13.3814	636.238	-5.5713	0.00065209	0.0052931
ENSGALG00000001097	27.9491	0	Inf	0.00065296	0.0052984
ENSGALG00000038000	39.732	6.63308	2.5825	0.00065412	0.0053061
ENSGALG00000036255	77.2883	5.78154	3.7407	0.00066515	0.005383
ENSGALG00000000909	5.5931	39.005	-2.8019	0.00066692	0.005392
ENSGALG00000031812	124.711	25.4316	2.2939	0.00067574	0.0054525
ENSGALG00000028284	1028.62	228.33	2.1715	0.00068663	0.0055275
Novel01605	17.2614	90.7962	-2.3951	0.00069537	0.0055905
ENSGALG00000015346	703.82	103.138	2.7706	0.0006962	0.0055953
ENSGALG00000039058	3.51935	27.9668	-2.9903	0.00070686	0.0056735
ENSGALG00000033786	16.0104	139.682	-3.1251	0.00071955	0.0057658
Novel01457	91.3752	17.0133	2.4251	0.00072016	0.0057681
ENSGALG00000036616	214.156	8.18228	4.71	0.00072803	0.0058249
Novel03046	368.288	16.5224	4.4783	0.00073389	0.0058615
ENSGALG00000011962	1018.43	154.289	2.7226	0.00073662	0.0058794
Novel02278	36.2456	0	Inf	0.00074025	0.0059065
Novel02335	200.521	45.0088	2.1555	0.00074531	0.0059391
ENSGALG00000008834	40.9489	7.72489	2.4062	0.00075262	0.005978
Novel00457	1.8809	21.9824	-3.5469	0.00075481	0.0059902
Novel01269	1.24383	18.8559	-3.9222	0.00075492	0.0059902
ENSGALG00000005981	64.7496	7.86868	3.0407	0.00075598	0.0059967
ENSGALG00000035725	65.2259	0	Inf	0.00076332	0.006047
ENSGALG00000036444	5.9859	32.7619	-2.4524	0.00077572	0.0061293
Novel02743	49.9991	4.99325	3.3239	0.0007976	0.0062799
Novel01392	58.3013	11.8572	2.2978	0.00081792	0.006417
Novel00723	53.1733	13.0987	2.0213	0.00082589	0.0064754
ENSGALG00000038899	22.5209	1.87097	3.5894	0.00083043	0.0065047
ENSGALG00000015287	4.61139	29.7033	-2.6873	0.00084401	0.0065899
ENSGALG00000004778	10.3588	60.6106	-2.5487	0.0008471	0.0066111
ENSGALG00000002367	118.768	26.0314	2.1898	0.00084896	0.0066201
ENSGALG00000034204	3816.35	67.62	5.8186	0.00086509	0.0067286
ENSGALG00000004946	27.3963	128.408	-2.2287	0.00086555	0.00673
ENSGALG00000041858	180.401	4.68481	5.2671	0.0008998	0.0069498
ENSGALG00000001983	55.4159	13.7277	2.0132	0.00091504	0.0070407
ENSGALG00000026247	22.3577	2.02508	3.4647	0.00092241	0.0070885
ENSGALG00000036716	3.50899	31.2328	-3.1539	0.0009297	0.007131
ENSGALG00000028895	149.502	31.1078	2.2648	0.00093281	0.0071526
Novel01234	10.0116	43.8018	-2.1293	0.00094099	0.0071917
ENSGALG00000009007	6.84835	37.5671	-2.4556	0.00094753	0.0072269
Novel00676	26.5973	3.81456	2.8017	0.0009873	0.0074903
Novel01972	10.7816	263.221	-4.6096	0.00099338	0.0075201
Novel00476	41.9578	9.19727	2.1897	0.00099745	0.0075368
Novel01999	30.2492	3.66537	3.0449	0.0010031	0.007577
ENSGALG00000039629	79.8814	2.33257	5.0979	0.0010068	0.0075982
ENSGALG00000000317	26.553	4.12181	2.6875	0.0010372	0.0077958
ENSGALG00000016592	314.024	1328.67	-2.081	0.0010403	0.0078167
ENSGALG00000015531	102.805	552.539	-2.4262	0.001042	0.0078277
Novel00349	44.3	0	Inf	0.0010508	0.0078817
ENSGALG00000043786	12.6403	0	Inf	0.0010629	0.0079621
ENSGALG00000001124	36.5704	1.71711	4.4126	0.0010671	0.0079889
Novel00448	45.3903	5.92581	2.9373	0.0010753	0.0080477
ENSGALG00000004747	103.212	13.6362	2.9201	0.0011221	0.0083646
ENSGALG00000023772	78.0072	314.226	-2.0101	0.001133	0.0084291
ENSGALG00000004358	14.6633	0.466514	4.9741	0.0011662	0.0086352
ENSGALG00000028612	5874	29121.9	-2.3097	0.0011958	0.0088223
ENSGALG00000014225	21.3146	1.24591	4.0966	0.0011971	0.0088266
ENSGALG00000001122	108.964	7.63824	3.8345	0.0012027	0.0088598
ENSGALG00000030887	22.7088	109.61	-2.2711	0.0012154	0.0089333
Novel00114	4.05645	27.6021	-2.7665	0.0012835	0.0093738
ENSGALG00000014372	12.2561	0	Inf	0.0012926	0.0094279
Novel01958	6.99725	34.994	-2.3222	0.0013026	0.0094939
ENSGALG00000040479	64.0438	14.1174	2.1816	0.0013085	0.0095324
ENSGALG00000013085	155.14	5.77662	4.7472	0.0013168	0.0095871
ENSGALG00000001512	22.8627	221.961	-3.2792	0.0013305	0.009664
ENSGALG00000026658	8.55568	40.7683	-2.2525	0.0013318	0.0096709
ENSGALG00000039633	8.63676	41.1123	-2.251	0.0013506	0.0097892
Novel00610	8.35535	39.8383	-2.2534	0.0013517	0.0097948
ENSGALG00000015466	86.9255	10.453	3.0559	0.0013732	0.0099237
Novel01408	45.0247	324.243	-2.8483	0.0013895	0.010024
ENSGALG00000023354	9.29493	40.4589	-2.1219	0.0013969	0.010068
Novel01575	3.26615	35.0683	-3.4245	0.0014105	0.010148
ENSGALG00000005621	449.705	1824.04	-2.0201	0.0014185	0.010191
ENSGALG00000002643	9.49526	38.6029	-2.0234	0.0014777	0.010571
ENSGALG00000037021	6.86619	35.7532	-2.3805	0.0015076	0.010761
ENSGALG00000041484	111.031	23.4721	2.2419	0.0015398	0.010962
ENSGALG00000013402	29.7296	3.5834	3.0525	0.0015796	0.011216
ENSGALG00000030995	47.6898	7.71529	2.6279	0.0016346	0.011566
Novel01500	16.0222	0.702349	4.5117	0.0016916	0.011921
ENSGALG00000038388	28.9825	4.52135	2.6804	0.0017059	0.012004
ENSGALG00000038513	4.14606	27.5091	-2.7301	0.0017238	0.01211
ENSGALG00000021451	34.5575	5.77242	2.5817	0.0017431	0.012211
ENSGALG00000037750	31.1844	5.22465	2.5774	0.0017762	0.012404
Novel01683	4.06537	60.9687	-3.9066	0.0017765	0.012404
ENSGALG00000014640	23.2273	2.65061	3.1314	0.0017775	0.012408
ENSGALG00000043660	21.7006	2.41454	3.1679	0.0017972	0.012539
Novel02011	8.65854	39.2172	-2.1793	0.0018008	0.012553
ENSGALG00000002015	105.942	658.475	-2.6359	0.0018191	0.01265
ENSGALG00000042177	10.3355	69.7363	-2.7543	0.0018194	0.01265
Novel00475	44.0648	10.9137	2.0135	0.0018201	0.012651
Novel01117	3.31614	36.3961	-3.4562	0.0018277	0.012693
ENSGALG00000012985	59.4511	12.4045	2.2608	0.0018393	0.012763
ENSGALG00000031833	2.68904	22.896	-3.0899	0.0018512	0.012819
ENSGALG00000035121	9.00029	72.1163	-3.0023	0.0018508	0.012819
ENSGALG00000039659	40.0037	3.50635	3.5121	0.0018521	0.012822
ENSGALG00000007815	13.8541	0.466514	4.8923	0.0018637	0.012881
ENSGALG00000001946	384.397	14.4926	4.7292	0.0018753	0.012943
Novel00012	18.4059	0	Inf	0.0018867	0.013006
ENSGALG00000005083	35.6476	7.86939	2.1795	0.0019088	0.01314
ENSGALG00000003217	7.62578	34.4715	-2.1764	0.001914	0.013164
ENSGALG00000011991	990.757	7506.37	-2.9215	0.0019498	0.013362
Novel01081	11.2872	0	Inf	0.0019568	0.013399
Novel01596	127.261	2.18362	5.8649	0.0019632	0.013428
Novel00687	21.8446	2.26067	3.2725	0.0019934	0.0136
ENSGALG00000015754	30.0593	4.05507	2.89	0.0020101	0.013702
ENSGALG00000034567	11.5987	0	Inf	0.0020575	0.013966
ENSGALG00000019060	884.527	84.1356	3.3941	0.0020892	0.014146
Novel02561	19.6501	1.48175	3.7292	0.0020883	0.014146
ENSGALG00000002329	3.65147	26.7981	-2.8756	0.0021037	0.014221
Novel02467	18.968	1.78924	3.4061	0.0021285	0.014373
Novel01880	33.8703	6.39748	2.4044	0.00213	0.014378
ENSGALG00000006186	31.0863	6.53635	2.2497	0.002138	0.014428
Novel00333	0.242837	21.4311	-6.4636	0.0021656	0.014591
ENSGALG00000009458	522.327	74.9606	2.8007	0.0021752	0.014651
ENSGALG00000041675	3.39971	31.0324	-3.1903	0.0021863	0.014705
Novel02510	7.2301	32.1267	-2.1517	0.0021937	0.014743
Novel01821	11.7408	356.928	-4.926	0.0021948	0.014747
ENSGALG00000020143	45.0979	2.50119	4.1724	0.0022024	0.014794
ENSGALG00000019696	7.82861	35.7099	-2.1895	0.0022284	0.014923
Novel00491	25.0089	3.50635	2.8344	0.0022564	0.015098
ENSGALG00000014615	596.515	112.621	2.4051	0.0022746	0.015195
ENSGALG00000016761	3.55005	24.7108	-2.7992	0.0022945	0.015319
ENSGALG00000033634	20.2547	1.87121	3.4362	0.0022941	0.015319
ENSGALG00000003193	6342.05	233.817	4.7615	0.0024208	0.016026
Novel00985	18.818	1.32765	3.8252	0.0024476	0.016182
ENSGALG00000034363	5.28991	29.6103	-2.4848	0.0024845	0.016373
ENSGALG00000042500	26.1235	4.2867	2.6074	0.0024913	0.016413
Novel02109	21.1396	1.87145	3.4977	0.0025129	0.016533
ENSGALG00000026384	32.7403	4.13189	2.9862	0.0025271	0.016617
ENSGALG00000032597	38.5334	0	Inf	0.0025463	0.016717
Novel00482	0	10.6165	#NAME?	0.0025761	0.016903
ENSGALG00000018293	0.788859	19.4007	-4.6202	0.0025781	0.016907
ENSGALG00000019019	78.7627	1.55833	5.6594	0.0026269	0.017158
ENSGALG00000012176	9.28275	37.5821	-2.0174	0.0026288	0.017163
Novel00783	11.073	0	Inf	0.0026333	0.017182
ENSGALG00000042207	49.6689	11.9961	2.0498	0.0026471	0.017253
ENSGALG00000039040	92.7175	9.8167	3.2395	0.0026654	0.017349
Novel01326	7.85932	35.8642	-2.1901	0.0026724	0.017384
ENSGALG00000016805	13.2774	0.3897	5.0905	0.0026901	0.017477
ENSGALG00000037951	70.0806	11.6401	2.5899	0.0027244	0.017672
ENSGALG00000003859	30.4673	5.69069	2.4206	0.002736	0.017728
Novel00021	19.9104	1.87097	3.4117	0.0027441	0.017771
ENSGALG00000009724	140.795	29.0995	2.2745	0.0027459	0.017778
ENSGALG00000042597	40.9143	197.266	-2.2695	0.0027755	0.017946
ENSGALG00000010342	9.08846	39.6713	-2.126	0.0027895	0.018027
ENSGALG00000004804	76.8266	10.9966	2.8045	0.0028805	0.01852
Novel01292	90.7634	21.9772	2.0461	0.0029141	0.018698
ENSGALG00000043737	0.485673	12.9441	-4.7362	0.0029509	0.018884
Novel01348	0	9.58579	#NAME?	0.0029715	0.018986
ENSGALG00000035220	10.7005	0	Inf	0.0030182	0.019219
ENSGALG00000021180	8.98993	56.2202	-2.6447	0.0030321	0.019298
ENSGALG00000027234	286.001	50.4871	2.502	0.003061	0.019467
ENSGALG00000014188	43.6834	3.51619	3.635	0.0030636	0.019478
Novel02264	6.3741	32.9024	-2.3679	0.00307	0.019493
Novel00330	1.41595	16.528	-3.5451	0.0030866	0.01959
Novel01720	1.0317	15.5898	-3.9175	0.0030954	0.019619
ENSGALG00000016707	6.19985	34.4373	-2.4737	0.003109	0.0197
ENSGALG00000016518	256.692	1209.98	-2.2369	0.0031907	0.020142
Novel01465	2.65978	20.9583	-2.9781	0.0031979	0.020174
ENSGALG00000007268	14.0666	77.7786	-2.4671	0.0032002	0.020178
Novel01037	26.2845	1.55833	4.0761	0.0032157	0.020271
Novel00030	0	9.73521	#NAME?	0.0032281	0.020338
Novel00303	104.552	12.924	3.0161	0.0032393	0.020398
ENSGALG00000006202	70.7205	17.4557	2.0184	0.0032499	0.02046
Novel02027	12.8932	0.312649	5.3659	0.0032819	0.020619
ENSGALG00000008006	82.8465	388.997	-2.2312	0.0033062	0.020739
ENSGALG00000026107	8.54532	36.3987	-2.0907	0.0033076	0.020743
ENSGALG00000018882	22.0445	1.87589	3.5548	0.0033175	0.020794
ENSGALG00000007623	1288.84	320.533	2.0075	0.0033258	0.020841
Novel03266	27.8654	2.9677	3.2311	0.0034361	0.021416
ENSGALG00000001698	46.1121	509.817	-3.4668	0.0035262	0.021899
ENSGALG00000009758	17.3857	1.55833	3.4798	0.0035876	0.022201
ENSGALG00000032113	32.6458	146.806	-2.1689	0.0035901	0.022211
ENSGALG00000011801	5.32954	28.2883	-2.4081	0.0036031	0.022269
Novel01572	0.485673	13.0884	-4.7522	0.0036244	0.022367
Novel03252	6.45267	41.5889	-2.6882	0.0036323	0.022404
ENSGALG00000038036	21.4585	2.49651	3.1036	0.0036537	0.022502
ENSGALG00000039989	115.331	23.0744	2.3214	0.0036822	0.022649
ENSGALG00000002775	210.597	47.8564	2.1377	0.0036861	0.022656
Novel01551	5.63417	32.015	-2.5065	0.0036873	0.022657
ENSGALG00000019276	10.1641	0	Inf	0.0036932	0.022676
ENSGALG00000029584	45.8084	0.779163	5.8775	0.0037214	0.022827
ENSGALG00000040661	23.2161	3.11665	2.8971	0.0037568	0.022991
ENSGALG00000008552	66.4253	15.5802	2.092	0.0037684	0.023037
ENSGALG00000001856	21.0968	2.88105	2.8724	0.0038273	0.023347
ENSGALG00000015126	20.57	2.88105	2.8359	0.0038285	0.023348
ENSGALG00000040461	10.5709	48.4407	-2.1961	0.0038703	0.023568
ENSGALG00000031974	14.9152	0	Inf	0.0039081	0.023762
ENSGALG00000028655	9.61846	42.4491	-2.1419	0.0039416	0.023928
ENSGALG00000035218	1.10241	15.1292	-3.7786	0.0039585	0.023991
ENSGALG00000011673	18.0927	1.94803	3.2153	0.003996	0.024164
ENSGALG00000032282	4.08609	24.2335	-2.5682	0.0041679	0.02508
ENSGALG00000041273	52.0723	8.26916	2.6547	0.0041911	0.025206
ENSGALG00000033872	157.177	37.9935	2.0486	0.0042231	0.025367
ENSGALG00000028886	0.909556	22.6616	-4.6389	0.0042255	0.025376
ENSGALG00000031338	74.8799	5.29536	3.8218	0.004243	0.025443
Novel00270	30.8549	6.08507	2.3422	0.0042561	0.02551
ENSGALG00000031971	25.0397	4.36304	2.5208	0.0042647	0.02554
Novel02896	30.0599	169.674	-2.4969	0.0042654	0.02554
ENSGALG00000040575	31.3247	5.54103	2.4991	0.0042914	0.025653
ENSGALG00000043740	10.3638	0	Inf	0.0042909	0.025653
ENSGALG00000032039	202.568	5.05976	5.3232	0.0043052	0.025728
ENSGALG00000009488	11.6105	71.9395	-2.6314	0.0043831	0.026136
Novel01210	5.95625	29.5394	-2.3102	0.0043937	0.026192
ENSGALG00000029705	0	9.1153	#NAME?	0.0044169	0.026318
ENSGALG00000026903	58.2418	0.702349	6.3737	0.0044186	0.026321
Novel01889	14.8737	0	Inf	0.0044838	0.026671
ENSGALG00000025971	273.636	1722.59	-2.6543	0.0044997	0.026714
ENSGALG00000040164	28.8668	2.49627	3.5316	0.0045405	0.026883
ENSGALG00000041692	2.90261	19.8079	-2.7707	0.0045603	0.026981
Novel00079	1.34524	15.4416	-3.5209	0.0046137	0.027224
Novel01066	4.09752	36.7425	-3.1646	0.004624	0.027272
Novel00527	14.7973	0.466514	4.9873	0.0046362	0.027317
ENSGALG00000041662	37.7786	2.17894	4.1159	0.0046543	0.027417
ENSGALG00000029699	24.8432	0.466514	5.7348	0.0046641	0.027449
ENSGALG00000040720	34.191	6.93121	2.3024	0.0047081	0.027654
ENSGALG00000042062	112.593	7.17617	3.9718	0.0048198	0.02823
ENSGALG00000007406	20.5371	0.933028	4.4602	0.0048277	0.028268
ENSGALG00000037123	1.65879	16.4507	-3.3099	0.0048825	0.028514
Novel01120	27.2005	4.44945	2.6119	0.0049764	0.028956
ENSGALG00000016448	17.2571	143.498	-3.0558	0.0049964	0.02904
ENSGALG00000020788	432.271	2226.5	-2.3648	0.0050198	0.029169
Novel01747	13.8027	0.625298	4.4643	0.005128	0.02967
ENSGALG00000033870	2.33587	18.4718	-2.9833	0.0051372	0.029695
Novel00050	57.509	303.913	-2.4018	0.0051515	0.029757
Novel01271	29.0267	2.33749	3.6344	0.0051538	0.029763
ENSGALG00000006926	13.7656	56.0089	-2.0246	0.0052126	0.030036
ENSGALG00000003334	4.24786	27.9693	-2.719	0.005257	0.030244
ENSGALG00000040769	1.56773	15.8163	-3.3347	0.0052735	0.030332
ENSGALG00000042637	29.3463	6.54619	2.1645	0.0053059	0.030504
Novel01515	15.8998	0.702349	4.5007	0.0054058	0.03099
Novel00531	138.145	0.625298	7.7874	0.0055165	0.031499
Novel00770	6.51339	113.166	-4.1189	0.0055551	0.03169
Novel02466	0	19.036	#NAME?	0.0055587	0.031695
ENSGALG00000007269	33.9607	8.34035	2.0257	0.0055795	0.031777
ENSGALG00000042022	0	8.72584	#NAME?	0.0056455	0.032056
Novel00442	12.2068	0	Inf	0.0056922	0.032291
Novel01073	23.5869	1.4047	4.0697	0.0057956	0.032786
Novel01994	10.6412	141.524	-3.7333	0.0058037	0.032824
ENSGALG00000041576	6.59409	29.2262	-2.148	0.0058299	0.032911
Novel01583	9.46524	0	Inf	0.0059483	0.033509
Novel00886	35.5577	158.195	-2.1535	0.0059771	0.033633
Novel02817	116.889	16.2095	2.8502	0.0059949	0.033725
ENSGALG00000038112	12.169	0.466514	4.7051	0.0060816	0.034158
Novel00211	0	32.3789	#NAME?	0.006214	0.034774
Novel01349	59.4153	6.08039	3.2886	0.0062214	0.034791
ENSGALG00000035042	6.93834	30.0879	-2.1165	0.0062309	0.034836
ENSGALG00000040123	0.849207	13.7809	-4.0204	0.0063516	0.035393
Novel02060	30.7495	3.9827	2.9487	0.0063731	0.035476
ENSGALG00000010867	14.6844	1.015	3.8547	0.006382	0.03551
ENSGALG00000025804	4.28892	24.084	-2.4894	0.0064285	0.035703
Novel00889	0.72851	22.5426	-4.9516	0.0065049	0.036029
ENSGALG00000003360	92.0561	22.9203	2.0059	0.0065965	0.036453
ENSGALG00000028402	11.3183	0.312649	5.178	0.0066739	0.036806
ENSGALG00000030788	3.03367	18.9484	-2.6429	0.0066899	0.036877
ENSGALG00000019175	14.2541	61.5156	-2.1096	0.006791	0.037325
Novel01278	9.24707	55.0019	-2.5724	0.0069	0.037822
Novel02033	17.5346	1.56324	3.4876	0.0069447	0.038024
ENSGALG00000035874	13.2245	0.856214	3.9491	0.0069993	0.038237
ENSGALG00000032802	2.66976	22.6688	-3.0859	0.0070756	0.038559
ENSGALG00000034310	21.1457	3.4293	2.6244	0.007181	0.039027
ENSGALG00000035197	7.09904	41.0566	-2.5319	0.0072507	0.039346
ENSGALG00000009615	283.783	19.169	3.8879	0.0072903	0.039526
Novel00127	5.53275	24.888	-2.1694	0.0073151	0.039634
ENSGALG00000010119	298.912	73.1299	2.0312	0.0073236	0.039671
ENSGALG00000041748	14.4302	1.32273	3.4475	0.0073768	0.039933
ENSGALG00000040249	28.3029	6.15696	2.2007	0.0074082	0.040076
Novel01291	41.8452	2.49135	4.0701	0.0074991	0.04046
ENSGALG00000028283	0.556383	11.8371	-4.4111	0.0075169	0.040538
ENSGALG00000033741	3.30722	24.4759	-2.8877	0.0075192	0.040542
ENSGALG00000021163	0	8.18228	#NAME?	0.007562	0.040709
Novel01710	2.92152	26.692	-3.1916	0.0075835	0.040801
Novel01646	101.667	1311.22	-3.689	0.0076711	0.041151
ENSGALG00000031533	7.43293	30.8525	-2.0534	0.0077463	0.041481
ENSGALG00000043544	21.156	2.96794	2.8335	0.0077462	0.041481
ENSGALG00000037271	15.5776	0.779163	4.3214	0.0077792	0.041621
ENSGALG00000012623	18.4991	2.65037	2.8032	0.0079223	0.042247
Novel01592	10.2566	42.1544	-2.0391	0.0079424	0.042336
ENSGALG00000013598	27.1348	6.00286	2.1764	0.0079753	0.042493
ENSGALG00000033464	21.5278	3.19886	2.7506	0.0081058	0.043044
ENSGALG00000042893	6.17912	25.8885	-2.0668	0.008173	0.043329
Novel00681	8.90031	0	Inf	0.0081958	0.04344
ENSGALG00000005448	3538.93	51710.7	-3.8691	0.0082001	0.043453
Novel03060	3.2983	25.9843	-2.9778	0.0082382	0.043622
ENSGALG00000039664	32.4343	3.73727	3.1175	0.0082539	0.043663
ENSGALG00000000576	66.0095	13.8151	2.2564	0.0082926	0.043829
Novel02453	0	7.87455	#NAME?	0.0083143	0.043901
ENSGALG00000032791	30.8487	6.55626	2.2343	0.008322	0.043927
Novel00525	17.4946	213.715	-3.6107	0.0083422	0.044006
ENSGALG00000010598	2.98331	18.8749	-2.6615	0.0083506	0.044037
ENSGALG00000001299	20.2651	2.96302	2.7739	0.0084277	0.04437
ENSGALG00000021696	2.62869	17.9264	-2.7697	0.0084251	0.04437
Novel01657	0	7.79773	#NAME?	0.0085169	0.044752
ENSGALG00000000616	11.0019	0.312649	5.1371	0.008633	0.045265
ENSGALG00000036551	65.0567	2.9677	4.4543	0.0086459	0.045314
Novel00112	0	15.8224	#NAME?	0.008651	0.04533
Novel01915	0.616732	11.069	-4.1657	0.0086731	0.045437
ENSGALG00000034192	22.4802	3.82416	2.5554	0.0086777	0.045451
Novel03282	12.6314	0.625298	4.3363	0.008732	0.045686
ENSGALG00000041066	0.485673	10.6116	-4.4495	0.0087498	0.04577
Novel00308	4.05501	21.0536	-2.3763	0.0088284	0.046121
ENSGALG00000038679	127.721	28.9075	2.1435	0.0088797	0.046369
ENSGALG00000035696	955.974	68.4938	3.8029	0.0089425	0.046647
ENSGALG00000036429	0.919918	12.1603	-3.7245	0.0089706	0.046744
ENSGALG00000034561	24.8665	5.21925	2.2523	0.0090245	0.046985
ENSGALG00000038959	14.1892	0.937946	3.9191	0.0090478	0.047066
ENSGALG00000016755	27.0409	6.07991	2.153	0.0091282	0.047403
ENSGALG00000036156	16.3018	1.71711	3.247	0.0091496	0.047473
Novel00869	1.3556	14.5697	-3.426	0.0091516	0.047474
Novel00990	16.3296	1.87145	3.1253	0.0092603	0.047956
ENSGALG00000037795	37.7433	0.625298	5.9155	0.0092686	0.047979
Novel01190	1867.88	39.3549	5.5687	0.0092753	0.047993
ENSGALG00000031997	372.351	50.6824	2.8771	0.0092847	0.048011
ENSGALG00000009498	11.0112	0.3897	4.8205	0.0094035	0.048462
ENSGALG00000012576	23.7637	4.59816	2.3696	0.0094765	0.048765
Novel00220	8.75996	38.3774	-2.1313	0.0095716	0.049192
ENSGALG00000037250	0.313547	12.943	-5.3673	0.0096641	0.049605
ENSGALG00000041331	821.681	54.2698	3.9204	0.0096677	0.049612

## Sheet: E12 vs 1d
Gene_id	readcount_H_E12_F	readcount_H_1d_F	log2FoldChange	pval	padj
ENSGALG00000032672	8452.06	2.58014	11.678	5.3084e-90	1.2823e-85
ENSGALG00000012790	5365.22	8.63457	9.2793	5.7558e-74	6.9519e-70
ENSGALG00000042386	2631.48	1.38634	10.89	7.3008e-72	5.8786e-68
ENSGALG00000010614	1221.39	317422	-8.0217	6.0331e-70	3.3768e-66
Novel01712	44.8237	14125.3	-8.2998	6.9896e-70	3.3768e-66
ENSGALG00000034427	12.5802	8034.66	-9.3189	3.7393e-69	1.5054e-65
ENSGALG00000010657	2156.98	1.38581	10.604	3.8655e-68	1.2149e-64
ENSGALG00000010928	2271.8	1.75139	10.341	4.0234e-68	1.2149e-64
ENSGALG00000038304	1619.65	2.31057	9.4532	5.5638e-61	1.4933e-57
ENSGALG00000002108	2597.6	4.01396	9.3379	1.1829e-59	2.8575e-56
ENSGALG00000014848	138.554	20997	-7.2436	2.2335e-59	4.9048e-56
ENSGALG00000042652	1.43165	1143.3	-9.6413	2.5457e-59	5.1246e-56
ENSGALG00000000608	4850.71	29.2926	7.3715	1.2676e-58	2.3555e-55
Novel01534	2100.37	3.45637	9.2472	2.4783e-57	4.2761e-54
ENSGALG00000008814	6.37904	1562.11	-7.9359	4.2435e-56	6.8337e-53
ENSGALG00000014221	9.45142	1801.86	-7.5747	2.0155e-54	3.0429e-51
ENSGALG00000017316	31.805	3949.62	-6.9563	4.6937e-54	6.6694e-51
ENSGALG00000005017	2.37289	857.729	-8.4977	5.2525e-54	7.0489e-51
ENSGALG00000034950	909.015	0.876224	10.019	3.5665e-53	4.5344e-50
ENSGALG00000042581	77.9782	7902.11	-6.663	1.2174e-52	1.4703e-49
ENSGALG00000001405	1000.51	2.62867	8.5722	2.9861e-51	3.4348e-48
ENSGALG00000011358	1219.49	5.30482	7.8448	7.2907e-51	8.0052e-48
ENSGALG00000030629	1015.95	1.65644	9.2605	1.0034e-49	1.0538e-46
ENSGALG00000008969	2368.13	2.16603	10.094	1.2951e-49	1.3035e-46
Novel01360	18.4048	2092.34	-6.8289	1.8621e-49	1.7992e-46
ENSGALG00000040529	740.301	0.876224	9.7226	2.2109e-49	2.0541e-46
ENSGALG00000039966	685.844	0.462114	10.535	4.1781e-49	3.738e-46
ENSGALG00000011270	3364.96	37.1743	6.5001	5.4198e-49	4.6757e-46
ENSGALG00000027536	677.042	0.461585	10.518	8.71e-49	7.2552e-46
ENSGALG00000011086	8078.32	599859	-6.2144	1.4211e-48	1.1443e-45
ENSGALG00000000299	697.598	0.876224	9.6369	4.0341e-48	3.1435e-45
ENSGALG00000014569	88.9464	6412.87	-6.1719	8.2609e-48	6.2359e-45
ENSGALG00000039712	55.3896	4430.72	-6.3218	2.2367e-47	1.6372e-44
ENSGALG00000015779	107.125	7385.92	-6.1074	7.9651e-47	5.4973e-44
Novel02711	0.210023	421.569	-10.971	7.8589e-47	5.4973e-44
Novel00662	1066.81	6.59357	7.338	1.3602e-46	9.1266e-44
ENSGALG00000019718	2829.33	8.53962	8.3721	1.8092e-45	1.1811e-42
ENSGALG00000008424	2401.37	2.21403	10.083	6.5462e-45	4.1613e-42
ENSGALG00000012775	741.276	3.04225	7.9287	3.5644e-44	2.2077e-41
ENSGALG00000010927	1258.55	12.6285	6.6389	4.494e-44	2.7139e-41
ENSGALG00000031183	588.558	0.828221	9.473	7.2166e-44	4.2518e-41
ENSGALG00000008439	379.873	18924.5	-5.6386	3.4408e-43	1.9789e-40
ENSGALG00000015140	488.421	0.414111	10.204	1.0943e-41	6.1472e-39
ENSGALG00000003690	7245.94	17.055	8.7308	3.3443e-41	1.836e-38
ENSGALG00000031960	2075.62	36.1673	5.8427	1.0598e-40	5.6891e-38
ENSGALG00000002638	133.26	6490.06	-5.6059	2.2994e-40	1.2075e-37
ENSGALG00000030002	1370.76	1.84846	9.5344	1.0045e-39	5.1625e-37
ENSGALG00000030212	53.2582	2579.11	-5.5977	1.101e-39	5.5406e-37
ENSGALG00000042303	721.354	6.88106	6.7119	1.1577e-39	5.7074e-37
ENSGALG00000041671	376.902	0	Inf	1.6157e-39	7.8058e-37
ENSGALG00000021271	434.548	0.92317	8.8787	2.0077e-39	9.5096e-37
ENSGALG00000005554	209.809	8724.33	-5.3779	3.2077e-39	1.4901e-36
ENSGALG00000016415	741.133	7.75781	6.5779	3.79e-39	1.7274e-36
Novel01212	1515.3	1.33781	10.146	4.1196e-39	1.8428e-36
Novel02520	373.844	15261.8	-5.3513	4.4132e-39	1.9383e-36
Novel03041	3344.72	78.3631	5.4156	7.3748e-39	3.1812e-36
ENSGALG00000003925	106.214	4692.45	-5.4653	1.4034e-38	5.9473e-36
ENSGALG00000001518	358.551	0	Inf	1.489e-38	6.2014e-36
ENSGALG00000032193	21.0215	1207.57	-5.8441	1.7726e-38	7.2572e-36
ENSGALG00000004320	1481.77	3.18468	8.862	2.8027e-38	1.1284e-35
ENSGALG00000003374	1826.24	0.414111	12.107	4.1006e-38	1.6238e-35
ENSGALG00000017398	529.208	0	Inf	7.0939e-38	2.7639e-35
ENSGALG00000008135	562.643	4.38006	7.0051	7.5592e-38	2.8984e-35
ENSGALG00000013193	664.371	1.84687	8.4908	1.1658e-37	4.4001e-35
ENSGALG00000006670	33.2376	3733.57	-6.8116	1.3984e-37	5.1969e-35
Novel01064	366.857	0.461585	9.6344	1.6944e-37	6.2014e-35
ENSGALG00000031076	357.505	0.414111	9.7537	4.7349e-37	1.7071e-34
ENSGALG00000035354	3.12795	401.554	-7.0042	6.9264e-37	2.4605e-34
ENSGALG00000005843	4204.87	154678	-5.2011	1.2551e-36	4.3938e-34
Novel00923	4.31013	3303.3	-9.582	1.3521e-36	4.6659e-34
ENSGALG00000040993	1262.53	26.6934	5.5637	3.1767e-36	1.0808e-33
ENSGALG00000009435	126.801	4732.23	-5.2219	5.676e-36	1.9043e-33
ENSGALG00000026536	85.0154	3244.73	-5.2542	6.9761e-36	2.3084e-33
ENSGALG00000035845	345.211	11941.3	-5.1123	8.8562e-36	2.891e-33
ENSGALG00000009129	769.633	3.823	7.6533	1.3502e-35	4.3488e-33
ENSGALG00000030349	353.533	0.92317	8.581	1.3813e-35	4.3902e-33
ENSGALG00000039681	3221.49	94.8431	5.086	1.8053e-35	5.6633e-33
ENSGALG00000006755	332.403	11371.6	-5.0964	1.8291e-35	5.6646e-33
ENSGALG00000006412	381.795	1.84793	7.6907	4.506e-35	1.3778e-32
ENSGALG00000038330	183.115	5797.88	-4.9847	5.7434e-35	1.7342e-32
ENSGALG00000009545	751.964	22190.3	-4.8831	6.8678e-35	2.0481e-32
Novel00194	334.574	0	Inf	7.0753e-35	2.0843e-32
ENSGALG00000015602	13.1004	58268.1	-12.119	1.2111e-34	3.5248e-32
Novel02911	434.383	3.45637	6.9736	1.3858e-34	3.9852e-32
ENSGALG00000037744	856.453	27629.4	-5.0117	1.7249e-34	4.9019e-32
ENSGALG00000029719	0.840091	260.439	-8.2762	1.9684e-34	5.529e-32
ENSGALG00000009700	305.598	61773.2	-7.6592	2.1654e-34	6.0123e-32
ENSGALG00000042362	773.941	23887	-4.9479	2.7225e-34	7.4732e-32
ENSGALG00000009870	49.959	1697.28	-5.0863	4.1432e-34	1.1245e-31
ENSGALG00000011252	703.607	12.9619	5.7624	8.3017e-34	2.2282e-31
ENSGALG00000039101	331.528	1.38528	7.9028	1.7291e-33	4.5898e-31
ENSGALG00000034895	28.5932	1030.68	-5.1718	5.4136e-33	1.4061e-30
ENSGALG00000040035	23.5359	916.984	-5.284	5.3654e-33	1.4061e-30
ENSGALG00000023542	2517.12	76.0769	5.0482	1.0779e-32	2.7699e-30
ENSGALG00000028570	255.361	0	Inf	1.2264e-32	3.1184e-30
ENSGALG00000007335	9.90279	1154.46	-6.8652	1.282e-32	3.2259e-30
ENSGALG00000005996	56.1183	1842.92	-5.0374	2.5092e-32	6.2488e-30
ENSGALG00000029943	308.371	1.28981	7.9014	2.736e-32	6.744e-30
ENSGALG00000016375	595.046	11.163	5.7362	3.4333e-32	8.3772e-30
ENSGALG00000015708	1923.19	65.9367	4.8663	3.6984e-32	8.8453e-30
Novel02968	10.7694	528.387	-5.6166	3.6903e-32	8.8453e-30
ENSGALG00000007484	781.882	19316.6	-4.6267	4.1197e-32	9.7564e-30
ENSGALG00000016301	63.3765	2041.04	-5.0092	4.6805e-32	1.0977e-29
ENSGALG00000008367	6594.05	85.8925	6.2625	6.2645e-32	1.455e-29
Novel01024	1145.8	0.923699	10.277	7.3488e-32	1.6906e-29
ENSGALG00000005995	557.696	10.4814	5.7336	7.5647e-32	1.7239e-29
ENSGALG00000002728	46.2534	1413.75	-4.9338	1.0871e-31	2.4543e-29
ENSGALG00000031970	60.1763	1798.49	-4.9014	1.1909e-31	2.6637e-29
Novel01646	88.3078	14621.1	-7.3713	1.31e-31	2.9032e-29
ENSGALG00000042317	34.5846	1089.24	-4.9771	2.7578e-31	6.0562e-29
ENSGALG00000010992	235.704	0	Inf	3.5427e-31	7.7097e-29
ENSGALG00000007690	527.719	1.75245	8.2343	3.9115e-31	8.4364e-29
ENSGALG00000011248	215.882	5360.61	-4.6341	4.2488e-31	9.0826e-29
ENSGALG00000008593	182.555	7482.34	-5.3571	6.8623e-31	1.4541e-28
ENSGALG00000040995	1980.12	48713.2	-4.6207	7.3741e-31	1.5489e-28
Novel00629	797.309	19712	-4.6278	1.4738e-30	3.0691e-28
ENSGALG00000011020	2234.1	48540	-4.4414	2.7805e-30	5.7407e-28
ENSGALG00000038022	1573.64	60.4878	4.7013	3.1244e-30	6.3961e-28
ENSGALG00000039522	13.9894	542.188	-5.2764	3.294e-30	6.6866e-28
ENSGALG00000011355	316.268	0	Inf	3.8762e-30	7.8028e-28
ENSGALG00000007412	272.249	1.38634	7.6175	4.4239e-30	8.8317e-28
ENSGALG00000034868	5235.65	241.401	4.4389	5.248e-30	1.0391e-27
ENSGALG00000031862	400.804	0	Inf	7.0271e-30	1.3801e-27
ENSGALG00000013762	301.26	0	Inf	8.0802e-30	1.5741e-27
ENSGALG00000041054	483.83	9.58729	5.6572	9.1229e-30	1.763e-27
ENSGALG00000033405	4479.82	204.153	4.4557	1.0916e-29	2.0927e-27
ENSGALG00000041461	459.241	8.95108	5.681	1.1433e-29	2.1746e-27
ENSGALG00000037443	271.821	5911.52	-4.4428	1.6465e-29	3.1073e-27
ENSGALG00000040904	15.8788	586.831	-5.2078	1.7851e-29	3.3427e-27
ENSGALG00000005043	84.3585	8033.54	-6.5734	2.7432e-29	5.0973e-27
ENSGALG00000028047	296.508	2.72203	6.7672	3.4655e-29	6.3902e-27
ENSGALG00000031552	809.275	17867.8	-4.4646	3.6069e-29	6.6006e-27
ENSGALG00000010386	446.41	8.52011	5.7114	4.096e-29	7.4393e-27
Novel02767	156.573	3501.83	-4.4832	4.2446e-29	7.6517e-27
ENSGALG00000022557	414.932	1.70445	7.9274	4.4374e-29	7.94e-27
ENSGALG00000011618	294.694	6297.09	-4.4174	4.7598e-29	8.4542e-27
Novel01249	85.4481	2316.68	-4.7609	4.9657e-29	8.7557e-27
ENSGALG00000017075	156.043	3452.21	-4.4675	5.0802e-29	8.8926e-27
ENSGALG00000027514	222.734	0.461585	8.9145	7.8476e-29	1.3638e-26
ENSGALG00000001096	1423.91	28549.3	-4.3255	8.8714e-29	1.5307e-26
ENSGALG00000015013	310.301	3.60038	6.4294	9.0169e-29	1.5448e-26
ENSGALG00000033829	27.5043	788.298	-4.841	1.0732e-28	1.8257e-26
ENSGALG00000008733	273.381	2.30845	6.8878	1.3564e-28	2.2912e-26
ENSGALG00000038631	692.789	1.38528	8.9661	1.5391e-28	2.5818e-26
ENSGALG00000014869	1090.07	21283.9	-4.2873	1.9118e-28	3.185e-26
ENSGALG00000009216	148.699	3257.11	-4.4531	1.9367e-28	3.2043e-26
ENSGALG00000009241	3662.54	185.01	4.3072	1.9969e-28	3.2814e-26
ENSGALG00000032779	2870.44	140.396	4.3537	2.6303e-28	4.2931e-26
ENSGALG00000016555	1788.81	34815.8	-4.2827	2.7335e-28	4.4315e-26
ENSGALG00000028115	2705.6	1.75192	10.593	3.5975e-28	5.7935e-26
Novel02112	411.456	12596.3	-4.9361	7.0003e-28	1.1199e-25
ENSGALG00000011950	3370.1	61770.7	-4.1961	1.3713e-27	2.1793e-25
ENSGALG00000005034	2133.07	38775.5	-4.1841	1.4695e-27	2.32e-25
ENSGALG00000026572	211.766	4026.92	-4.2491	1.7385e-27	2.7269e-25
ENSGALG00000002891	2635.37	48293.7	-4.1958	1.8501e-27	2.8834e-25
Novel03257	6.30868	2080.51	-8.3654	2.1457e-27	3.3226e-25
ENSGALG00000035913	3.32945	1604.56	-8.9127	2.276e-27	3.5019e-25
ENSGALG00000016442	2669.52	136.746	4.287	2.3541e-27	3.5991e-25
Novel00537	345.191	6.22852	5.7924	2.3763e-27	3.6102e-25
ENSGALG00000016993	861.482	15907.2	-4.2067	2.8458e-27	4.2964e-25
ENSGALG00000030894	3890.15	75861	-4.2855	2.9689e-27	4.4544e-25
ENSGALG00000003285	475.618	13.1096	5.1811	3.3643e-27	5.0165e-25
ENSGALG00000041344	1076.32	19280.5	-4.163	3.7309e-27	5.529e-25
ENSGALG00000012952	1161.8	51.9203	4.4839	5.2283e-27	7.7009e-25
ENSGALG00000036484	345.536	1.8474	7.5472	5.5602e-27	8.1401e-25
ENSGALG00000016680	289.65	4.15902	6.1219	6.0827e-27	8.8514e-25
ENSGALG00000006480	466.056	1.8474	7.9789	6.9932e-27	1.0115e-24
ENSGALG00000016426	6.13051	569.558	-6.5377	8.644e-27	1.2429e-24
ENSGALG00000015345	179.839	0	Inf	1.0385e-26	1.4844e-24
ENSGALG00000009219	36.5566	877.477	-4.5852	1.07e-26	1.5204e-24
ENSGALG00000029974	4.21698	269.508	-5.998	1.6685e-26	2.3569e-24
ENSGALG00000008393	1213.55	58.795	4.3674	1.9404e-26	2.7251e-24
ENSGALG00000009601	1214.74	58.257	4.3821	2.2983e-26	3.2091e-24
Novel01487	46.8515	1252.69	-4.7408	2.3382e-26	3.2461e-24
ENSGALG00000038495	427.428	11.6715	5.1946	2.4459e-26	3.3762e-24
ENSGALG00000014687	567.566	0.462114	10.262	2.776e-26	3.8101e-24
ENSGALG00000008204	93.6782	1820.8	-4.2807	3.3007e-26	4.5046e-24
ENSGALG00000005763	524.065	18.0868	4.8567	3.7786e-26	5.1278e-24
ENSGALG00000042360	1110.51	2.30951	8.9094	3.9791e-26	5.3698e-24
ENSGALG00000041775	12.0747	404.608	-5.0665	4.2722e-26	5.7333e-24
ENSGALG00000014695	16.159	3311.13	-7.6788	4.7359e-26	6.3205e-24
ENSGALG00000025819	1484.85	24273.6	-4.031	4.9544e-26	6.5758e-24
ENSGALG00000016430	1129.01	18656.5	-4.0465	5.9171e-26	7.8105e-24
ENSGALG00000004249	644.816	25.5186	4.6593	6.458e-26	8.4783e-24
ENSGALG00000004250	1845.26	98.509	4.2274	6.6451e-26	8.6767e-24
ENSGALG00000014505	244.105	0.462114	9.045	7.8354e-26	1.0176e-23
ENSGALG00000016524	3404.89	203.045	4.0677	9.3877e-26	1.2127e-23
ENSGALG00000006503	788.171	13284.7	-4.0751	9.657e-26	1.2408e-23
ENSGALG00000042784	91.2112	1777.26	-4.2843	1.9977e-25	2.5533e-23
ENSGALG00000007038	434.875	13.9826	4.9589	3.5033e-25	4.454e-23
ENSGALG00000043112	3.7347	471.54	-6.9802	5.3983e-25	6.8273e-23
ENSGALG00000001449	244.368	3.64732	6.0661	5.9236e-25	7.4526e-23
Novel01925	1366.82	22459.8	-4.0385	5.9552e-25	7.4536e-23
ENSGALG00000001330	3866.43	59026.2	-3.9323	6.241e-25	7.771e-23
ENSGALG00000032534	2657.59	100603	-5.2424	6.3944e-25	7.9212e-23
ENSGALG00000002597	18.438	493.133	-4.7412	7.0151e-25	8.6458e-23
ENSGALG00000036686	737.168	34.2402	4.4282	7.4548e-25	9.1411e-23
ENSGALG00000037401	1675.46	25380.8	-3.9211	9.1608e-25	1.1176e-22
ENSGALG00000038672	1281.63	18833.4	-3.8772	1.0773e-24	1.3078e-22
ENSGALG00000023195	237.286	0.875695	8.082	1.345e-24	1.6245e-22
ENSGALG00000013999	22.024	1350.01	-5.9378	1.3715e-24	1.6483e-22
ENSGALG00000036713	797.465	12166.7	-3.9314	1.3929e-24	1.6657e-22
ENSGALG00000008298	3359.89	222.582	3.916	1.56e-24	1.8563e-22
ENSGALG00000006110	1962.81	122.058	4.0073	1.7722e-24	2.0984e-22
ENSGALG00000026080	405.303	0.923699	8.7774	1.8025e-24	2.124e-22
ENSGALG00000007110	49.5101	4871.53	-6.6205	2.0237e-24	2.3616e-22
ENSGALG00000010881	93.1332	3227.69	-5.1151	2.0179e-24	2.3616e-22
ENSGALG00000038984	302.991	6.95968	5.4441	2.0937e-24	2.4316e-22
ENSGALG00000013822	365.91	6160.1	-4.0734	2.8965e-24	3.3477e-22
ENSGALG00000036221	20.2528	938.277	-5.5338	3.3059e-24	3.8027e-22
ENSGALG00000000059	489.039	8.85666	5.787	3.6975e-24	4.233e-22
ENSGALG00000026452	886.603	30120.7	-5.0863	3.8438e-24	4.3798e-22
ENSGALG00000036853	412.474	6255.56	-3.9228	4.1636e-24	4.7219e-22
ENSGALG00000008858	2491.83	35491.1	-3.8322	4.852e-24	5.4766e-22
ENSGALG00000043779	332.614	9.12676	5.1876	4.8745e-24	5.4766e-22
ENSGALG00000028302	1720.85	24812.7	-3.8499	5.1384e-24	5.7464e-22
ENSGALG00000033118	742.349	33.3023	4.4784	6.0966e-24	6.7866e-22
ENSGALG00000036513	141.534	3133.13	-4.4684	6.6789e-24	7.4007e-22
ENSGALG00000039080	2089.34	137.388	3.9267	8.3859e-24	9.2498e-22
ENSGALG00000004230	174.12	0.875695	7.6354	8.7211e-24	9.5757e-22
ENSGALG00000009719	392.609	13.981	4.8115	9.1861e-24	1.0041e-21
ENSGALG00000003778	1497.1	22543.4	-3.9125	9.5257e-24	1.0365e-21
ENSGALG00000043223	757.383	37.4139	4.3394	1.1184e-23	1.2115e-21
ENSGALG00000019719	2372.81	3.04225	9.6072	1.3364e-23	1.4412e-21
ENSGALG00000003584	3428.2	241.793	3.8256	1.4616e-23	1.5692e-21
ENSGALG00000040276	190.504	1.79886	6.7266	1.496e-23	1.599e-21
ENSGALG00000003922	5507.31	402.311	3.775	1.9673e-23	2.0843e-21
ENSGALG00000015961	1504.95	20839	-3.7915	1.9635e-23	2.0843e-21
ENSGALG00000014463	6652.98	182284	-4.776	2.1347e-23	2.2517e-21
ENSGALG00000033516	826.13	45.4386	4.1844	2.2736e-23	2.3879e-21
ENSGALG00000003085	2679.4	186.897	3.8416	2.5687e-23	2.6861e-21
ENSGALG00000038362	946.275	56.1141	4.0758	3.7162e-23	3.8694e-21
ENSGALG00000036915	506.702	22.8251	4.4724	3.873e-23	4.0153e-21
ENSGALG00000040582	153.944	0.462114	8.3799	4.1222e-23	4.2554e-21
ENSGALG00000038946	11.7397	1204.67	-6.6811	4.5225e-23	4.6487e-21
ENSGALG00000027632	193.716	2810.84	-3.859	5.6655e-23	5.799e-21
ENSGALG00000035350	223.716	4.10891	5.7668	5.9885e-23	6.1038e-21
ENSGALG00000038874	751.319	41.5576	4.1762	6.0919e-23	6.183e-21
ENSGALG00000038375	192.437	2908.11	-3.9176	7.341e-23	7.4197e-21
ENSGALG00000040212	340.95	4693.5	-3.783	7.7173e-23	7.7675e-21
ENSGALG00000038440	199.996	3407.76	-4.0908	7.8066e-23	7.8247e-21
ENSGALG00000042422	1192.4	51.5801	4.5309	9.6182e-23	9.6007e-21
ENSGALG00000034083	438.191	5959.69	-3.7656	9.783e-23	9.725e-21
ENSGALG00000025842	20927.7	290876	-3.7969	9.8247e-23	9.7265e-21
ENSGALG00000000769	506.996	23.8907	4.4075	1.0211e-22	1.0067e-20
ENSGALG00000034680	170.044	58940.1	-8.4372	1.1329e-22	1.1125e-20
ENSGALG00000031454	62.3701	1146.45	-4.2002	1.2532e-22	1.2207e-20
ENSGALG00000038936	1075.7	15397.8	-3.8394	1.2532e-22	1.2207e-20
ENSGALG00000030372	63.4637	2082.61	-5.0363	1.5247e-22	1.4791e-20
ENSGALG00000027374	5.25137	931.874	-7.4713	1.5445e-22	1.4924e-20
ENSGALG00000007837	3008.96	175.591	4.099	1.7815e-22	1.7145e-20
ENSGALG00000033888	1832.88	23679.2	-3.6914	1.8445e-22	1.7681e-20
ENSGALG00000007904	618.422	8003.47	-3.694	1.9059e-22	1.8197e-20
ENSGALG00000041548	3144.51	237.824	3.7249	2.001e-22	1.903e-20
ENSGALG00000004195	2106.2	155.031	3.764	2.1263e-22	2.0142e-20
ENSGALG00000014453	67.8768	1097.97	-4.0158	2.5151e-22	2.3732e-20
ENSGALG00000030898	118.295	1957.88	-4.0488	2.7526e-22	2.5772e-20
ENSGALG00000031744	732.865	20446.3	-4.8021	2.7488e-22	2.5772e-20
ENSGALG00000013056	10.3171	1613.51	-7.289	2.8538e-22	2.6514e-20
ENSGALG00000023193	414.494	17.7576	4.5448	2.8445e-22	2.6514e-20
ENSGALG00000036360	165.512	1.38528	6.9006	3.5774e-22	3.3109e-20
ENSGALG00000040189	282.852	0.923699	8.2584	3.9371e-22	3.63e-20
ENSGALG00000034384	558.831	5.66881	6.6232	4.5904e-22	4.2162e-20
ENSGALG00000013167	2036.91	25299.7	-3.6347	4.7228e-22	4.3213e-20
ENSGALG00000005956	844.115	13.9336	5.9208	5.0107e-22	4.5674e-20
ENSGALG00000008821	892.062	12117.1	-3.7638	5.524e-22	5.0164e-20
ENSGALG00000008606	1891.47	23579.2	-3.6399	5.5667e-22	5.0363e-20
ENSGALG00000005789	3071.21	38462.1	-3.6466	5.7081e-22	5.1449e-20
ENSGALG00000009530	389.97	16.8345	4.5339	7.1168e-22	6.3909e-20
Novel02797	452.749	8360	-4.2067	7.7212e-22	6.9079e-20
ENSGALG00000028537	1894.42	23257.4	-3.6179	7.9497e-22	7.0861e-20
ENSGALG00000035636	542.418	6978.94	-3.6855	8.3087e-22	7.3788e-20
ENSGALG00000016562	3.89728	933.894	-7.9046	9.0801e-22	8.0344e-20
ENSGALG00000002925	3122.84	38543.7	-3.6256	9.2557e-22	8.1598e-20
ENSGALG00000027771	767.271	16080.9	-4.3895	1.0833e-21	9.5158e-20
ENSGALG00000041749	41.6434	717.856	-4.1075	1.1319e-21	9.9062e-20
ENSGALG00000038884	1446.35	19284	-3.7369	1.2306e-21	1.0732e-19
ENSGALG00000029140	4279.92	34.926	6.9371	1.4667e-21	1.2745e-19
ENSGALG00000015511	787.991	50.7998	3.9553	1.4792e-21	1.2761e-19
ENSGALG00000035804	448.524	5594.54	-3.6408	1.4773e-21	1.2761e-19
ENSGALG00000041118	14.4232	323.758	-4.4885	1.56e-21	1.3411e-19
Novel01299	451.799	1.70392	8.0507	2.0377e-21	1.7455e-19
ENSGALG00000008980	173.713	2.30898	6.2333	2.1191e-21	1.8024e-19
ENSGALG00000030991	361.753	2.94625	6.94	2.1183e-21	1.8024e-19
ENSGALG00000023738	362.201	7.97779	5.5047	2.259e-21	1.9146e-19
ENSGALG00000043448	122.121	1700.39	-3.7995	2.4315e-21	2.0537e-19
ENSGALG00000007300	2884.12	197.747	3.8664	2.7259e-21	2.2943e-19
ENSGALG00000042249	0.692302	112.861	-7.3489	3.9811e-21	3.3391e-19
ENSGALG00000021021	653.111	39.7867	4.037	4.0759e-21	3.4068e-19
ENSGALG00000043372	381.995	2.21403	7.4307	4.6805e-21	3.8987e-19
ENSGALG00000021443	1001.5	70.3115	3.8323	4.8411e-21	4.0186e-19
ENSGALG00000008084	806.143	9413.49	-3.5456	5.1641e-21	4.2677e-19
Novel02136	676.638	43.4551	3.9608	5.1765e-21	4.2677e-19
Novel02761	1002.39	140474	-7.1307	5.557e-21	4.5658e-19
ENSGALG00000007048	534.816	6257.75	-3.5485	5.9586e-21	4.8791e-19
ENSGALG00000001184	640.445	7563.55	-3.5619	6.1502e-21	5.0191e-19
ENSGALG00000002781	1089.06	80.4068	3.7596	6.8999e-21	5.6119e-19
ENSGALG00000042961	349.765	9.73395	5.1672	7.0898e-21	5.7471e-19
ENSGALG00000013191	483.427	5725.77	-3.5661	7.2083e-21	5.8236e-19
ENSGALG00000036316	21.432	749.439	-5.128	7.8414e-21	6.3139e-19
ENSGALG00000039001	754.787	9195.05	-3.6067	7.9248e-21	6.3599e-19
ENSGALG00000037675	21399.7	370.314	5.8527	8.282e-21	6.6245e-19
ENSGALG00000014897	901.502	63.7876	3.821	8.8357e-21	7.0441e-19
ENSGALG00000005007	11.5919	525.652	-5.5029	9.0574e-21	7.1971e-19
ENSGALG00000002907	10414.2	181167	-4.1207	1.0166e-20	8.0513e-19
ENSGALG00000010535	761.17	48.7013	3.9662	1.0409e-20	8.2173e-19
ENSGALG00000001949	3231.68	36658.2	-3.5038	1.1021e-20	8.6717e-19
ENSGALG00000025810	1830.51	152.125	3.5889	1.1483e-20	9.0059e-19
ENSGALG00000001975	232.049	2742.31	-3.5629	1.8626e-20	1.4561e-18
ENSGALG00000016955	292.337	3366.99	-3.5258	1.8978e-20	1.4789e-18
ENSGALG00000009076	1173.92	12825.7	-3.4496	2.2683e-20	1.7618e-18
ENSGALG00000007080	296.296	3.18626	6.539	2.3469e-20	1.8171e-18
Novel00437	352.771	17.2612	4.3531	2.4082e-20	1.8585e-18
ENSGALG00000015008	16.7444	328.817	-4.2955	2.6231e-20	2.0179e-18
ENSGALG00000008486	437.683	5187.35	-3.567	2.6544e-20	2.0355e-18
Novel01227	1264.4	100.263	3.6566	2.737e-20	2.0923e-18
ENSGALG00000030466	3532.69	38813.3	-3.4577	2.8393e-20	2.1636e-18
Novel00901	1006.13	76.6171	3.715	3.0729e-20	2.3342e-18
ENSGALG00000008233	1232.84	99.2232	3.6352	3.367e-20	2.5496e-18
ENSGALG00000004260	1084.76	2.62709	8.6897	3.4894e-20	2.634e-18
ENSGALG00000021128	3158.36	276.304	3.5148	3.7177e-20	2.7977e-18
ENSGALG00000038629	285.152	4.38059	6.0245	3.7557e-20	2.8175e-18
ENSGALG00000009442	1056.09	11548.5	-3.4509	3.8834e-20	2.9042e-18
ENSGALG00000010326	314.86	14.497	4.4409	4.0276e-20	3.0028e-18
ENSGALG00000029319	1552.54	16703.6	-3.4274	4.1983e-20	3.1204e-18
ENSGALG00000004274	2409.29	43.1881	5.8018	4.229e-20	3.1336e-18
ENSGALG00000002988	2927.95	148.388	4.3024	4.326e-20	3.1957e-18
Novel00993	10.8288	260.956	-4.5909	4.4945e-20	3.31e-18
ENSGALG00000004809	233.734	2693.45	-3.5265	4.5253e-20	3.3226e-18
ENSGALG00000006575	18.214	336.196	-4.2062	4.7826e-20	3.5009e-18
Novel00949	433.901	4825.3	-3.4752	4.9143e-20	3.5864e-18
ENSGALG00000005845	1211.41	97.3943	3.6367	4.9515e-20	3.6027e-18
ENSGALG00000011008	220.527	6.73546	5.033	5.0231e-20	3.6438e-18
ENSGALG00000004980	254.915	4276.7	-4.0684	5.2509e-20	3.7977e-18
ENSGALG00000042836	51.2153	733.106	-3.8394	7.3146e-20	5.2744e-18
ENSGALG00000027166	4.89316	174.276	-5.1545	8.5839e-20	6.1712e-18
ENSGALG00000008604	157.036	1884.34	-3.5849	9.4981e-20	6.8082e-18
Novel01420	138.155	1.33728	6.6908	9.6851e-20	6.9217e-18
ENSGALG00000039539	378.138	20.4818	4.2065	1.0283e-19	7.3273e-18
ENSGALG00000013001	315.757	14.9575	4.3999	1.1013e-19	7.8244e-18
ENSGALG00000011419	186.223	4.33206	5.4258	1.1478e-19	8.1312e-18
ENSGALG00000030064	214.697	2418.36	-3.4937	1.3044e-19	9.2134e-18
Novel02094	611.574	43.9324	3.7992	1.4583e-19	1.027e-17
ENSGALG00000038801	11389.3	117423	-3.366	1.757e-19	1.2338e-17
ENSGALG00000039447	127.459	0.828221	7.2658	1.7664e-19	1.2368e-17
ENSGALG00000029383	1304.23	13963.6	-3.4204	1.772e-19	1.2371e-17
ENSGALG00000017276	108.817	0	Inf	2.0099e-19	1.3992e-17
ENSGALG00000007931	2071.77	21347.1	-3.3651	2.2031e-19	1.5293e-17
ENSGALG00000016791	44.6011	623.8	-3.8059	2.3475e-19	1.6248e-17
ENSGALG00000008066	1105.85	11295.1	-3.3525	2.7965e-19	1.9301e-17
ENSGALG00000015701	226.715	7.97938	4.8285	2.8249e-19	1.9441e-17
Novel02114	229.481	8.44255	4.7646	3.0508e-19	2.0936e-17
ENSGALG00000033034	67.1669	937.048	-3.8023	3.0798e-19	2.1075e-17
ENSGALG00000002033	938.03	12525.9	-3.7391	3.5939e-19	2.4524e-17
Novel00526	185.22	4.93713	5.2294	3.6644e-19	2.4934e-17
ENSGALG00000031902	223.419	2508.16	-3.4888	3.675e-19	2.4936e-17
Novel02483	79.382	1841.28	-4.5358	3.9351e-19	2.6627e-17
ENSGALG00000030834	116.485	0.461585	7.9793	4.1092e-19	2.7727e-17
ENSGALG00000002125	719.779	8022.75	-3.4785	4.3341e-19	2.9082e-17
ENSGALG00000011657	467.882	30.8957	3.9207	4.3258e-19	2.9082e-17
ENSGALG00000005147	760.166	7785.91	-3.3565	4.4946e-19	3.0076e-17
ENSGALG00000036034	288.051	14.0765	4.355	4.5916e-19	3.064e-17
ENSGALG00000005749	3828.06	38166.3	-3.3176	4.9024e-19	3.2623e-17
ENSGALG00000009703	1352.7	13484.4	-3.3174	5.234e-19	3.4735e-17
ENSGALG00000030377	1612.36	64.8015	4.637	5.4893e-19	3.6329e-17
ENSGALG00000014873	5599.2	570.965	3.2937	5.8198e-19	3.8411e-17
ENSGALG00000002490	3160.97	31609	-3.3219	6.1375e-19	4.0397e-17
Novel01195	123.048	0.828221	7.215	6.2066e-19	4.0741e-17
ENSGALG00000002103	429.965	8488.96	-4.3033	7.0363e-19	4.6062e-17
Novel00746	198.545	2163.21	-3.4456	7.3343e-19	4.7883e-17
ENSGALG00000009654	668.784	24794.3	-5.2123	7.5075e-19	4.8881e-17
ENSGALG00000008890	117.997	1298.84	-3.4604	7.8816e-19	5.1179e-17
ENSGALG00000031242	34.2457	5818.61	-7.4086	8.0051e-19	5.1842e-17
ENSGALG00000033446	2089.93	21424.1	-3.3577	8.3069e-19	5.3653e-17
ENSGALG00000008659	195.599	2179.66	-3.4781	8.6795e-19	5.591e-17
ENSGALG00000010826	178.735	2051.88	-3.5211	8.8074e-19	5.6583e-17
ENSGALG00000007448	41.0095	539.981	-3.7189	9.23e-19	5.914e-17
ENSGALG00000011661	1317.37	12778.7	-3.278	9.594e-19	6.131e-17
ENSGALG00000042809	3515.81	34188.9	-3.2816	1.0702e-18	6.8211e-17
ENSGALG00000010936	291.695	3176.59	-3.4449	1.0774e-18	6.849e-17
ENSGALG00000014121	1398.62	13610.5	-3.2826	1.2292e-18	7.7936e-17
ENSGALG00000035099	453.205	16.1487	4.8107	1.4139e-18	8.9408e-17
ENSGALG00000042009	605.081	46.4267	3.7041	1.4207e-18	8.9607e-17
ENSGALG00000015624	4301.75	449.317	3.2591	1.4261e-18	8.9708e-17
ENSGALG00000031996	216.261	2295.97	-3.4083	1.4854e-18	9.3199e-17
ENSGALG00000017272	415.108	7797.01	-4.2314	1.5122e-18	9.4633e-17
ENSGALG00000028283	0.48228	217.098	-8.8143	1.6907e-18	1.0553e-16
ENSGALG00000019157	163.504	14619.1	-6.4824	1.7838e-18	1.1106e-16
Novel00847	2.58291	232.098	-6.4896	1.8066e-18	1.1219e-16
ENSGALG00000009537	82.2174	938.982	-3.5136	1.8115e-18	1.122e-16
ENSGALG00000012552	631.015	6104.02	-3.274	2.0294e-18	1.2538e-16
ENSGALG00000000690	99.8389	0	Inf	2.0449e-18	1.2601e-16
ENSGALG00000043829	99.1563	1115.71	-3.4921	2.2179e-18	1.3632e-16
ENSGALG00000021180	7.81202	530.298	-6.085	2.3e-18	1.4101e-16
ENSGALG00000009971	1353.61	131.595	3.3626	2.5161e-18	1.5387e-16
ENSGALG00000012705	287.111	3114.66	-3.4394	2.5531e-18	1.5574e-16
ENSGALG00000004794	1289.16	123.345	3.3857	2.634e-18	1.6027e-16
ENSGALG00000005550	280.795	2778.46	-3.3067	2.8519e-18	1.7309e-16
ENSGALG00000011796	99.0268	0	Inf	2.8621e-18	1.7328e-16
ENSGALG00000005809	1003.55	90.7031	3.4678	3.0132e-18	1.8197e-16
ENSGALG00000015453	136.74	1977.91	-3.8545	3.1473e-18	1.8959e-16
ENSGALG00000014847	4002.24	39942.9	-3.3191	3.3751e-18	2.0281e-16
ENSGALG00000025999	3608.19	34141.4	-3.2422	3.41e-18	2.0439e-16
ENSGALG00000011811	1950.69	18281.8	-3.2284	3.44e-18	2.0569e-16
ENSGALG00000007609	1354.23	130.947	3.3704	3.4902e-18	2.0817e-16
ENSGALG00000015842	936.79	85.1682	3.4593	3.6237e-18	2.156e-16
ENSGALG00000042003	116.766	0.923699	6.982	3.6881e-18	2.1889e-16
Novel02529	70.7221	755.781	-3.4177	4.1763e-18	2.4726e-16
ENSGALG00000036519	471.417	34.1168	3.7884	4.5019e-18	2.6589e-16
ENSGALG00000028308	135.3	2.31004	5.8721	4.8726e-18	2.8708e-16
ENSGALG00000016582	908.048	82.2912	3.464	4.9179e-18	2.8904e-16
ENSGALG00000006864	1803.32	64.4601	4.8061	5.1383e-18	3.0126e-16
ENSGALG00000041418	2068.58	19175.9	-3.2126	5.2639e-18	3.0788e-16
ENSGALG00000036645	876.019	78.6844	3.4768	5.3366e-18	3.1138e-16
ENSGALG00000033207	649.702	6190.42	-3.2522	5.6903e-18	3.3122e-16
ENSGALG00000016299	186.282	1.79939	6.6938	5.92e-18	3.4376e-16
ENSGALG00000002495	4755.52	42701.6	-3.1666	6.0845e-18	3.5162e-16
ENSGALG00000031763	328.325	19.8277	4.0495	6.0705e-18	3.5162e-16
Novel00788	80.4601	866.449	-3.4288	6.169e-18	3.5565e-16
ENSGALG00000009302	424.042	29.637	3.8387	6.8408e-18	3.9344e-16
ENSGALG00000002908	447.306	33.0844	3.757	6.9718e-18	4.0003e-16
ENSGALG00000033063	477.546	35.9642	3.731	7.9446e-18	4.5476e-16
ENSGALG00000015691	2640.24	283.935	3.217	8.2642e-18	4.7194e-16
ENSGALG00000011483	200.511	1973.37	-3.2989	8.3716e-18	4.7694e-16
ENSGALG00000003852	329.559	16.7996	4.294	8.5656e-18	4.865e-16
ENSGALG00000005087	104.399	0.414111	7.9779	8.5797e-18	4.865e-16
ENSGALG00000012546	2408.9	255.13	3.2391	9.1224e-18	5.1606e-16
ENSGALG00000043198	1316.36	12934.1	-3.2966	9.594e-18	5.4148e-16
ENSGALG00000033001	1928.15	17445.1	-3.1775	9.8493e-18	5.5459e-16
Novel00868	2.55252	281.042	-6.7827	1.0109e-17	5.679e-16
ENSGALG00000038225	112.972	0.923699	6.9343	1.0672e-17	5.9812e-16
ENSGALG00000010120	661.967	57.8007	3.5176	1.1109e-17	6.2118e-16
ENSGALG00000036881	52.2012	727.686	-3.8012	1.1787e-17	6.5759e-16
ENSGALG00000043476	322.94	19.7818	4.029	1.2074e-17	6.7204e-16
ENSGALG00000003802	56.5356	1024.57	-4.1797	1.2916e-17	7.1723e-16
ENSGALG00000012873	206.907	1.70445	6.9235	1.3296e-17	7.3666e-16
ENSGALG00000011562	37.2812	474.881	-3.671	1.4046e-17	7.7644e-16
ENSGALG00000034453	1688.28	175.274	3.2679	1.4883e-17	8.2079e-16
ENSGALG00000030115	1065.94	50.6252	4.3961	1.5168e-17	8.3464e-16
ENSGALG00000005739	250.555	13.1069	4.2567	1.6034e-17	8.8029e-16
ENSGALG00000035393	5.6245	388.806	-6.1112	1.6529e-17	9.0537e-16
ENSGALG00000016102	322.653	20.5736	3.9711	1.6632e-17	9.0898e-16
ENSGALG00000005002	5705.69	51032.6	-3.1609	1.6788e-17	9.1541e-16
Novel03224	169.818	5.3027	5.0011	1.7011e-17	9.2548e-16
ENSGALG00000010053	5327.5	609.47	3.1278	1.7742e-17	9.6307e-16
ENSGALG00000004161	1845.75	200.014	3.206	2.0041e-17	1.0854e-15
ENSGALG00000008537	1474.53	152.684	3.2716	2.0349e-17	1.0997e-15
ENSGALG00000017046	13213.9	1579.91	3.0641	2.1094e-17	1.1374e-15
ENSGALG00000013090	207.151	9.04868	4.5168	2.1888e-17	1.1776e-15
ENSGALG00000006912	63.0812	708.585	-3.4897	2.2663e-17	1.2165e-15
ENSGALG00000007072	896.813	7869.78	-3.1334	2.3193e-17	1.2395e-15
Novel01822	199.003	4.28353	5.5378	2.3191e-17	1.2395e-15
ENSGALG00000026380	1407.24	147.101	3.258	2.7843e-17	1.4847e-15
Novel02798	856.905	16917.3	-4.3032	2.8774e-17	1.531e-15
ENSGALG00000012697	695.773	53.0218	3.714	3.0231e-17	1.605e-15
ENSGALG00000029422	193.136	3.96595	5.6058	3.0855e-17	1.6345e-15
ENSGALG00000016834	276.06	2529.85	-3.196	3.1759e-17	1.6787e-15
ENSGALG00000041347	623.615	0	Inf	3.4538e-17	1.8216e-15
ENSGALG00000007408	102.373	1019.39	-3.3158	3.9367e-17	2.0718e-15
ENSGALG00000015437	964.994	8366.32	-3.116	3.9728e-17	2.0862e-15
ENSGALG00000010211	457.486	4040.89	-3.1429	4.0157e-17	2.1042e-15
ENSGALG00000039576	759.495	71.8983	3.401	4.1003e-17	2.1439e-15
ENSGALG00000012199	541.947	46.4931	3.5431	4.3462e-17	2.2675e-15
ENSGALG00000002860	0	68.846	#NAME?	4.3872e-17	2.284e-15
ENSGALG00000014155	2889.44	25083.6	-3.1179	4.4023e-17	2.2869e-15
ENSGALG00000037332	522.315	4574.5	-3.1306	4.4511e-17	2.3073e-15
ENSGALG00000016536	4285.53	36825.8	-3.1032	4.9376e-17	2.554e-15
ENSGALG00000036892	1378.64	148.028	3.2193	5.0791e-17	2.6216e-15
ENSGALG00000035369	337.228	3087.4	-3.1946	5.1259e-17	2.6401e-15
ENSGALG00000026862	3421.3	396.023	3.1109	5.1796e-17	2.6621e-15
ENSGALG00000017167	130.876	1.70392	6.2632	5.2299e-17	2.6823e-15
Novel00186	361.778	13.1381	4.7833	5.7209e-17	2.9278e-15
ENSGALG00000037802	114.572	1.24233	6.5271	5.9267e-17	3.0268e-15
Novel01928	102.039	994.656	-3.2851	5.9735e-17	3.0442e-15
ENSGALG00000033295	475.892	4097.91	-3.1062	6.0789e-17	3.0914e-15
ENSGALG00000017025	2022.35	228.501	3.1458	6.8609e-17	3.4818e-15
ENSGALG00000012710	270.129	16.519	4.0315	7.4248e-17	3.76e-15
ENSGALG00000043287	350.666	3037.2	-3.1146	7.5266e-17	3.8036e-15
ENSGALG00000018287	14.2053	242.198	-4.0917	7.8006e-17	3.9338e-15
ENSGALG00000017136	222.41	11.7686	4.2402	8.0715e-17	4.062e-15
ENSGALG00000042134	1133.31	81.2223	3.8025	8.116e-17	4.0759e-15
ENSGALG00000017715	546.531	4756.71	-3.1216	8.2579e-17	4.1385e-15
ENSGALG00000006174	1173.89	123.982	3.2431	8.606e-17	4.3041e-15
ENSGALG00000000720	70.5354	717.211	-3.346	8.8813e-17	4.4326e-15
ENSGALG00000001512	19.8061	302.393	-3.9324	9.2622e-17	4.6131e-15
ENSGALG00000003800	422.135	5089.91	-3.5919	9.9061e-17	4.9237e-15
Novel00137	70.1826	784.794	-3.4831	1.0101e-16	5.0102e-15
ENSGALG00000016945	1347.39	148.682	3.1799	1.046e-16	5.1777e-15
ENSGALG00000010133	2087.58	38.6525	5.7551	1.1436e-16	5.6495e-15
ENSGALG00000034645	1515.38	12590.8	-3.0546	1.1685e-16	5.7606e-15
ENSGALG00000007768	684.753	66.3862	3.3666	1.1884e-16	5.8467e-15
ENSGALG00000011930	110.545	1.24233	6.4754	1.2355e-16	6.0658e-15
ENSGALG00000004239	2728.98	165.608	4.0425	1.4066e-16	6.8919e-15
ENSGALG00000008239	857.267	7197.08	-3.0696	1.5601e-16	7.6289e-15
ENSGALG00000002321	2723.26	22273.1	-3.0319	1.5919e-16	7.7687e-15
ENSGALG00000032893	860.788	7301.29	-3.0844	1.6756e-16	8.1605e-15
ENSGALG00000003438	893.876	93.4726	3.2575	1.7669e-16	8.5878e-15
ENSGALG00000029214	297.145	2686.78	-3.1766	1.8516e-16	8.9812e-15
Novel01711	952.321	101.268	3.2333	1.94e-16	9.3912e-15
ENSGALG00000005309	2366.76	278.063	3.0894	1.9491e-16	9.4163e-15
ENSGALG00000037625	6061.48	280.642	4.4329	2.0017e-16	9.6515e-15
ENSGALG00000017380	3146.64	25714.6	-3.0307	2.0065e-16	9.6552e-15
ENSGALG00000034655	1085.41	117.578	3.2065	2.179e-16	1.0464e-14
ENSGALG00000006997	273.018	4.57208	5.9	2.2723e-16	1.0891e-14
ENSGALG00000001452	3876.55	31291.5	-3.0129	2.445e-16	1.1672e-14
ENSGALG00000015358	400.94	32.6993	3.6161	2.4433e-16	1.1672e-14
ENSGALG00000035030	1708.66	198.678	3.1044	2.4715e-16	1.1776e-14
ENSGALG00000035058	84.4524	0	Inf	2.4919e-16	1.1849e-14
ENSGALG00000041808	85.8195	820.403	-3.257	2.7302e-16	1.2957e-14
ENSGALG00000005854	617.089	5108.48	-3.0493	2.8168e-16	1.3342e-14
Novel01706	216.068	1861.94	-3.1073	2.8264e-16	1.3361e-14
Novel01198	106.338	1.38528	6.2623	2.8608e-16	1.3497e-14
ENSGALG00000006805	112.48	1031.86	-3.1975	2.9361e-16	1.3826e-14
ENSGALG00000015110	42.9836	490.118	-3.5113	3.006e-16	1.4127e-14
ENSGALG00000030247	191.068	6731.61	-5.1388	3.0338e-16	1.423e-14
ENSGALG00000015360	723.627	72.9655	3.31	3.047e-16	1.4264e-14
ENSGALG00000007917	1145.03	47.2021	4.6004	3.0694e-16	1.4341e-14
ENSGALG00000015410	281.601	2561.75	-3.1854	3.206e-16	1.495e-14
ENSGALG00000016692	530.162	49.8803	3.4099	3.3784e-16	1.5724e-14
Novel00493	877.976	8.90467	6.6235	3.477e-16	1.6152e-14
ENSGALG00000006041	92.0401	0.461585	7.6395	3.6738e-16	1.7034e-14
Novel01647	583.787	4679.55	-3.0029	3.88e-16	1.7955e-14
ENSGALG00000010748	288.233	20.4364	3.818	3.9023e-16	1.8024e-14
ENSGALG00000041043	42.1786	1873.28	-5.4729	4.0334e-16	1.8594e-14
ENSGALG00000019175	12.3456	537.919	-5.4453	4.1967e-16	1.931e-14
ENSGALG00000006775	734.102	6305.55	-3.1026	4.2743e-16	1.9593e-14
ENSGALG00000042554	140.264	1256.1	-3.1627	4.2745e-16	1.9593e-14
ENSGALG00000041422	804.787	6482.86	-3.01	4.2986e-16	1.9666e-14
ENSGALG00000006835	9017.58	189863	-4.3961	4.5849e-16	2.0936e-14
ENSGALG00000005961	1142.7	129.841	3.1376	5.736e-16	2.6135e-14
ENSGALG00000010005	1225.3	9735.24	-2.9901	5.745e-16	2.6135e-14
ENSGALG00000013956	131.743	3.45689	5.2521	5.7696e-16	2.6197e-14
ENSGALG00000028620	121.856	2.62762	5.5353	5.7923e-16	2.6251e-14
ENSGALG00000031403	199.427	76336.5	-8.5804	5.9587e-16	2.6955e-14
ENSGALG00000034024	110.148	991.815	-3.1706	6.1929e-16	2.7962e-14
Novel02884	278.568	19.2937	3.8518	6.2806e-16	2.8305e-14
Novel01511	363.699	3.64573	6.6404	6.7833e-16	3.0513e-14
ENSGALG00000008185	125.884	1475.93	-3.5515	7.0791e-16	3.1785e-14
ENSGALG00000007257	285.461	0	Inf	7.1665e-16	3.2118e-14
ENSGALG00000004550	263.311	2133.79	-3.0186	7.4065e-16	3.307e-14
ENSGALG00000006753	3428.63	26761.8	-2.9645	7.3964e-16	3.307e-14
ENSGALG00000029017	26.1697	318.182	-3.6039	7.5341e-16	3.3578e-14
ENSGALG00000043307	994.958	7766.6	-2.9646	8.1947e-16	3.6455e-14
ENSGALG00000038411	383.583	32.8412	3.546	8.7581e-16	3.889e-14
ENSGALG00000006037	2649.12	334.373	2.986	1.0325e-15	4.5761e-14
ENSGALG00000030767	134.29	3.871	5.1165	1.0824e-15	4.7889e-14
ENSGALG00000001160	685.855	72.8478	3.2349	1.1227e-15	4.958e-14
ENSGALG00000006409	730.353	5659.4	-2.954	1.1283e-15	4.9734e-14
ENSGALG00000040987	1089.21	8388.43	-2.9451	1.1676e-15	5.1374e-14
ENSGALG00000036798	4347.84	34450.1	-2.9861	1.1854e-15	5.2064e-14
ENSGALG00000007926	2755.6	21027.4	-2.9318	1.2993e-15	5.696e-14
ENSGALG00000012211	2188.35	16417.3	-2.9073	1.3086e-15	5.7264e-14
ENSGALG00000031563	877.031	6868.11	-2.9692	1.4145e-15	6.1788e-14
ENSGALG00000013968	1061.22	8051.05	-2.9234	1.4716e-15	6.4167e-14
ENSGALG00000037211	25.0458	299.491	-3.5799	1.5427e-15	6.7143e-14
ENSGALG00000005465	1972.01	15037.9	-2.9309	1.6148e-15	7.0065e-14
ENSGALG00000039468	575.42	4547.91	-2.9825	1.6156e-15	7.0065e-14
ENSGALG00000001475	16080.3	2203.94	2.8671	1.6243e-15	7.0191e-14
ENSGALG00000031142	1410.74	16014.8	-3.5049	1.6231e-15	7.0191e-14
ENSGALG00000014513	559.471	56.4982	3.3078	1.6325e-15	7.0418e-14
ENSGALG00000004302	2813.11	21108.7	-2.9076	1.6523e-15	7.1148e-14
ENSGALG00000012420	5181.39	324.824	3.9956	1.6843e-15	7.2394e-14
ENSGALG00000002371	219.205	2023.64	-3.2066	1.6878e-15	7.2415e-14
Novel03270	0	103.977	#NAME?	1.7325e-15	7.4204e-14
ENSGALG00000037717	478.338	46.223	3.3713	1.7378e-15	7.4299e-14
Novel01517	36	516.421	-3.8425	1.7547e-15	7.4886e-14
ENSGALG00000011288	393.28	35.7204	3.4607	1.8148e-15	7.7317e-14
ENSGALG00000029230	258.661	18.6486	3.7939	1.9173e-15	8.1539e-14
ENSGALG00000005451	1132.6	134.376	3.0753	2.158e-15	9.1453e-14
ENSGALG00000008713	917.935	76.5812	3.5833	2.1546e-15	9.1453e-14
ENSGALG00000008095	1244.06	152.443	3.0287	2.3306e-15	9.8595e-14
ENSGALG00000013634	10.6493	1885.47	-7.468	2.4309e-15	1.0266e-13
ENSGALG00000034281	221.258	1766.01	-2.9967	2.438e-15	1.0278e-13
ENSGALG00000005088	268.808	2171.63	-3.0141	2.4623e-15	1.0362e-13
ENSGALG00000023464	392.224	35.3301	3.4727	2.4862e-15	1.0445e-13
ENSGALG00000026981	1182.21	146.241	3.0151	2.494e-15	1.0459e-13
ENSGALG00000010674	856.07	98.3881	3.1212	2.517e-15	1.0537e-13
Novel02204	541.787	33.2305	4.0271	2.6049e-15	1.0886e-13
ENSGALG00000035065	484.195	48.5262	3.3188	2.8647e-15	1.1952e-13
ENSGALG00000003818	444.914	43.7425	3.3464	2.8815e-15	1.2001e-13
ENSGALG00000012416	133.446	4.52407	4.8825	3.0426e-15	1.265e-13
ENSGALG00000024481	706.754	75.782	3.2213	3.0621e-15	1.2709e-13
ENSGALG00000002388	1946.97	14445.1	-2.8913	3.0748e-15	1.274e-13
ENSGALG00000002993	229.543	15.7804	3.8626	3.0862e-15	1.2765e-13
ENSGALG00000035465	793.314	90.6392	3.1297	3.268e-15	1.3494e-13
ENSGALG00000033890	42.3356	448.981	-3.4067	3.2834e-15	1.3535e-13
ENSGALG00000019003	676.507	72.7688	3.2167	3.3081e-15	1.3613e-13
ENSGALG00000030209	1038.94	44.7048	4.5385	3.4635e-15	1.4229e-13
ENSGALG00000035334	100084	732887	-2.8724	3.6376e-15	1.4919e-13
ENSGALG00000042264	733.723	82.0749	3.1602	3.7098e-15	1.5189e-13
ENSGALG00000027316	770.63	0	Inf	3.7382e-15	1.5279e-13
ENSGALG00000003261	3588.47	26289.7	-2.8731	3.7787e-15	1.5419e-13
ENSGALG00000008909	207.259	7141.1	-5.1066	3.7967e-15	1.5444e-13
ENSGALG00000010628	564.744	23665.8	-5.3891	3.7977e-15	1.5444e-13
ENSGALG00000036759	564.301	60.4536	3.2226	3.9272e-15	1.5944e-13
ENSGALG00000043597	285.251	22.6462	3.6549	3.9458e-15	1.5992e-13
Novel03287	367.006	32.4092	3.5013	3.9547e-15	1.6002e-13
Novel03083	1056.6	128.913	3.035	3.9731e-15	1.6049e-13
ENSGALG00000028424	83.7437	0.414111	7.6598	4.0053e-15	1.6152e-13
ENSGALG00000011967	1094.43	133.449	3.0358	4.082e-15	1.6434e-13
ENSGALG00000015094	2.39621	96.3212	-5.329	4.2708e-15	1.7166e-13
ENSGALG00000036637	449.098	3483.64	-2.9555	4.3058e-15	1.7278e-13
ENSGALG00000009207	116.176	995.922	-3.0997	4.4229e-15	1.7718e-13
ENSGALG00000043787	418.912	3938.23	-3.2328	4.5434e-15	1.817e-13
ENSGALG00000017128	399.046	37.5383	3.4101	4.5968e-15	1.8327e-13
ENSGALG00000030603	586.753	64.3208	3.1894	4.5978e-15	1.8327e-13
ENSGALG00000038733	393.695	3028.22	-2.9433	4.6469e-15	1.8493e-13
ENSGALG00000000284	109.622	932.548	-3.0886	4.6994e-15	1.8671e-13
ENSGALG00000031122	225.368	15.3231	3.8785	5.246e-15	2.0808e-13
ENSGALG00000026971	307.285	2399.72	-2.9652	5.3171e-15	2.1056e-13
ENSGALG00000001620	85.4202	1252.19	-3.8737	5.3778e-15	2.1261e-13
ENSGALG00000041923	1161.05	144.806	3.0032	5.5919e-15	2.2072e-13
ENSGALG00000010286	1707.2	12470.9	-2.8689	5.6623e-15	2.2313e-13
ENSGALG00000011792	150.691	6.7344	4.4839	5.8754e-15	2.3115e-13
ENSGALG00000007863	2554.9	18347.2	-2.8442	5.9996e-15	2.3565e-13
ENSGALG00000003256	967.155	7185.96	-2.8934	6.1552e-15	2.4137e-13
ENSGALG00000037017	1450.94	10573.7	-2.8654	6.1761e-15	2.418e-13
ENSGALG00000016635	7970.64	1135.96	2.8108	6.2448e-15	2.4409e-13
ENSGALG00000037593	457.483	3390.3	-2.8896	6.4457e-15	2.5154e-13
ENSGALG00000011541	3190.67	24092.6	-2.9167	6.5826e-15	2.5646e-13
ENSGALG00000006489	1475.55	10835.7	-2.8765	6.711e-15	2.6105e-13
ENSGALG00000034434	4820.55	34609.5	-2.8439	6.7726e-15	2.627e-13
ENSGALG00000042246	571.983	4170.24	-2.8661	6.7752e-15	2.627e-13
ENSGALG00000015712	383.533	35.7743	3.4224	6.9532e-15	2.6917e-13
ENSGALG00000032550	374.355	8581.28	-4.5187	6.9676e-15	2.6929e-13
ENSGALG00000010379	31.7673	336.576	-3.4053	7.0644e-15	2.7216e-13
ENSGALG00000015151	308.519	25.7228	3.5842	7.0567e-15	2.7216e-13
ENSGALG00000010357	292.204	2285.14	-2.9672	7.2426e-15	2.7859e-13
ENSGALG00000041478	1051.7	7927.62	-2.9142	7.3323e-15	2.8159e-13
ENSGALG00000009690	1042.06	129.697	3.0062	7.3616e-15	2.8227e-13
ENSGALG00000036010	24.8017	294.549	-3.57	7.4533e-15	2.8533e-13
ENSGALG00000004037	425.02	42.3541	3.327	7.5895e-15	2.9008e-13
ENSGALG00000015142	321.593	27.144	3.5665	7.8496e-15	2.9955e-13
ENSGALG00000002675	278.199	3.775	6.2035	7.9982e-15	3.0474e-13
ENSGALG00000035994	379.754	2957.56	-2.9613	8.0802e-15	3.0738e-13
ENSGALG00000001678	351.884	2698.66	-2.9391	8.1978e-15	3.1136e-13
ENSGALG00000026276	237.158	1832.07	-2.9496	8.3315e-15	3.1594e-13
ENSGALG00000016809	138.467	4.69817	4.8813	8.6917e-15	3.2909e-13
ENSGALG00000014425	665.137	77.8071	3.0957	8.8672e-15	3.3521e-13
ENSGALG00000011281	346.96	32.0668	3.4356	9.1924e-15	3.4696e-13
ENSGALG00000008040	61.9253	5125.05	-6.3709	9.2919e-15	3.5016e-13
ENSGALG00000029354	388.322	37.8311	3.3596	9.3371e-15	3.5132e-13
ENSGALG00000010540	114.796	3.09079	5.2149	9.4058e-15	3.5335e-13
ENSGALG00000016328	1292.79	165.981	2.9614	9.5947e-15	3.5989e-13
ENSGALG00000002283	242.65	1840.32	-2.923	9.7429e-15	3.6488e-13
ENSGALG00000007191	1597.37	209.089	2.9335	9.786e-15	3.6593e-13
ENSGALG00000005407	838.47	19503.6	-4.5398	1.0159e-14	3.7927e-13
ENSGALG00000014984	215.148	14.6199	3.8793	1.0214e-14	3.8077e-13
ENSGALG00000041323	607.638	69.1583	3.1352	1.0241e-14	3.8118e-13
ENSGALG00000005704	1278.87	8997.25	-2.8146	1.0575e-14	3.9299e-13
ENSGALG00000035599	1781.73	200.341	3.1528	1.0735e-14	3.9833e-13
ENSGALG00000025743	585.261	64.5979	3.1795	1.0859e-14	4.0231e-13
ENSGALG00000043800	1.58703	197.623	-6.9603	1.1077e-14	4.0977e-13
Novel00182	197.192	3.18574	5.9518	1.1571e-14	4.2738e-13
ENSGALG00000000839	1143.49	17.7766	6.0073	1.1806e-14	4.3541e-13
ENSGALG00000016843	3494.82	25512.4	-2.8679	1.1899e-14	4.3814e-13
ENSGALG00000028284	894.25	30.7934	4.86	1.1934e-14	4.388e-13
ENSGALG00000033766	32.454	757.755	-4.5453	1.2376e-14	4.5434e-13
ENSGALG00000009450	772.022	5596.74	-2.8579	1.2762e-14	4.6637e-13
ENSGALG00000017229	590.167	67.3188	3.132	1.2725e-14	4.6637e-13
ENSGALG00000027415	68.6155	865.433	-3.6568	1.2749e-14	4.6637e-13
ENSGALG00000014526	4946.89	34902.6	-2.8187	1.3163e-14	4.8033e-13
ENSGALG00000041915	425.407	19.1049	4.4768	1.35e-14	4.9185e-13
ENSGALG00000038520	59.8418	1680.58	-4.8117	1.3647e-14	4.9648e-13
ENSGALG00000003473	525.338	56.9545	3.2054	1.3677e-14	4.9683e-13
ENSGALG00000039384	472.861	50.1895	3.236	1.3952e-14	5.0605e-13
ENSGALG00000015874	650.384	76.9768	3.0788	1.4347e-14	5.196e-13
ENSGALG00000000549	74.3994	608.568	-3.0321	1.4511e-14	5.2475e-13
ENSGALG00000015751	2564.77	17914.5	-2.8042	1.4624e-14	5.2802e-13
ENSGALG00000042604	299.59	2407.92	-3.0067	1.4798e-14	5.3352e-13
ENSGALG00000036212	30.4809	750.25	-4.6214	1.5276e-14	5.4994e-13
ENSGALG00000032687	1820.86	227.143	3.0029	1.5402e-14	5.5364e-13
ENSGALG00000036836	88.6119	0	Inf	1.5984e-14	5.7372e-13
ENSGALG00000031553	528.21	58.8726	3.1654	1.6043e-14	5.7497e-13
ENSGALG00000032060	170.263	9.26866	4.1993	1.6085e-14	5.7562e-13
ENSGALG00000003588	102.959	2.26098	5.509	1.6456e-14	5.8803e-13
ENSGALG00000007646	705.838	5058.35	-2.8413	1.6629e-14	5.9334e-13
ENSGALG00000007878	1276.89	8923.9	-2.805	1.6701e-14	5.9502e-13
ENSGALG00000003837	191.03	12.2745	3.9601	1.749e-14	6.2222e-13
ENSGALG00000042103	69.7468	594.07	-3.0904	1.8037e-14	6.4073e-13
ENSGALG00000014753	536.082	60.1133	3.1567	1.8179e-14	6.4485e-13
ENSGALG00000038313	165.126	8.9052	4.2128	1.8523e-14	6.5608e-13
ENSGALG00000010476	871.433	6087.49	-2.8044	1.8864e-14	6.6719e-13
ENSGALG00000006602	102.542	2.30898	5.4728	1.9507e-14	6.8891e-13
ENSGALG00000022896	498.485	3.18362	7.2907	2.0312e-14	7.163e-13
ENSGALG00000042177	8.97848	151.195	-4.0738	2.0725e-14	7.298e-13
ENSGALG00000014801	842.973	104.962	3.0056	2.2249e-14	7.8231e-13
ENSGALG00000015018	2017.58	39417.2	-4.2881	2.2582e-14	7.9287e-13
ENSGALG00000010900	762.189	93.3993	3.0287	2.3276e-14	8.1603e-13
ENSGALG00000000902	84.9241	0.828221	6.68	2.4758e-14	8.6673e-13
ENSGALG00000000824	13.0017	209.039	-4.007	2.5302e-14	8.8452e-13
ENSGALG00000007289	1790.41	12400.7	-2.7921	2.572e-14	8.9783e-13
ENSGALG00000034271	1289.64	172.791	2.8999	2.6325e-14	9.176e-13
ENSGALG00000010960	338.006	32.6634	3.3713	2.6495e-14	9.222e-13
ENSGALG00000011009	119.75	0.92317	7.0192	2.8064e-14	9.7543e-13
ENSGALG00000016676	2264.22	324.856	2.8011	2.8666e-14	9.9491e-13
ENSGALG00000033351	2271.25	11.1166	7.6746	2.9339e-14	1.0168e-12
ENSGALG00000013235	693.783	4833.91	-2.8006	2.9982e-14	1.0369e-12
ENSGALG00000040173	1052.13	7312.03	-2.797	3.0005e-14	1.0369e-12
ENSGALG00000015271	835.077	6117.11	-2.8729	3.066e-14	1.058e-12
ENSGALG00000016931	395.012	40.828	3.2743	3.1079e-14	1.071e-12
ENSGALG00000013420	676.755	83.1383	3.025	3.1874e-14	1.0952e-12
ENSGALG00000036175	1181.74	159.514	2.8892	3.1847e-14	1.0952e-12
ENSGALG00000003126	42.1649	1006.56	-4.5772	3.2163e-14	1.1036e-12
ENSGALG00000002742	353.237	35.2974	3.323	3.6072e-14	1.236e-12
ENSGALG00000039571	94.8296	1.79939	5.7198	3.664e-14	1.2536e-12
ENSGALG00000001849	450.434	49.0701	3.1984	3.6754e-14	1.2558e-12
ENSGALG00000013887	409.479	3269.84	-2.9974	4.0038e-14	1.366e-12
ENSGALG00000008584	1109.05	148.633	2.8995	4.0436e-14	1.3777e-12
ENSGALG00000037687	117.958	4.06196	4.86	4.0709e-14	1.385e-12
ENSGALG00000004687	365.111	37.1464	3.297	4.1244e-14	1.4013e-12
ENSGALG00000032910	173.175	1921.18	-3.4717	4.2454e-14	1.4403e-12
ENSGALG00000003904	82.3197	0.875695	6.5547	4.4723e-14	1.5152e-12
ENSGALG00000012089	69.0186	0	Inf	4.6343e-14	1.5679e-12
ENSGALG00000033047	144.227	7.10421	4.3435	4.6473e-14	1.5701e-12
ENSGALG00000010255	3746.67	555.644	2.7534	4.8464e-14	1.6351e-12
ENSGALG00000013208	960.805	128.411	2.9035	4.8903e-14	1.6476e-12
ENSGALG00000033231	753.544	95.9493	2.9733	5.051e-14	1.6993e-12
ENSGALG00000011325	964.186	6644.61	-2.7848	5.1038e-14	1.7147e-12
ENSGALG00000033816	544.454	64.6717	3.0736	5.1661e-14	1.7288e-12
ENSGALG00000035950	363.577	38.2093	3.2503	5.1631e-14	1.7288e-12
ENSGALG00000043435	10.2777	698.079	-6.0858	5.1673e-14	1.7288e-12
Novel00084	230.041	19.2057	3.5823	5.4457e-14	1.8194e-12
ENSGALG00000000632	392.366	41.892	3.2275	5.6748e-14	1.8934e-12
ENSGALG00000003484	298.321	27.8556	3.4208	5.847e-14	1.9481e-12
ENSGALG00000006198	598.622	63.4141	3.2388	6.0111e-14	2.0001e-12
ENSGALG00000039212	2178.54	14299.3	-2.7145	6.0218e-14	2.0009e-12
ENSGALG00000002726	1636.51	11399.5	-2.8003	6.1575e-14	2.0432e-12
ENSGALG00000001101	2240.52	325.809	2.7817	6.3337e-14	2.0987e-12
ENSGALG00000030526	299.172	28.8431	3.3747	6.4393e-14	2.1308e-12
ENSGALG00000031524	297.586	27.7611	3.4222	6.5596e-14	2.1676e-12
ENSGALG00000006494	189.592	1401.19	-2.8857	7.0143e-14	2.3147e-12
ENSGALG00000010868	67.9344	0	Inf	7.0625e-14	2.3275e-12
ENSGALG00000011406	59.2831	492.609	-3.0548	7.3845e-14	2.4302e-12
ENSGALG00000006899	3076.31	20242.4	-2.7181	7.4125e-14	2.4328e-12
ENSGALG00000027091	532.686	63.9474	3.0583	7.4091e-14	2.4328e-12
ENSGALG00000001885	256.992	0.462114	9.1193	7.6776e-14	2.5164e-12
ENSGALG00000008536	456.849	9152.27	-4.3243	7.7525e-14	2.5375e-12
ENSGALG00000032595	2340.74	15232.6	-2.7021	7.881e-14	2.5761e-12
ENSGALG00000004897	483.611	56.4666	3.0984	7.9348e-14	2.5882e-12
ENSGALG00000029576	2205.61	14507.8	-2.7176	7.9396e-14	2.5882e-12
ENSGALG00000031860	74.0386	1566.96	-4.4035	7.9678e-14	2.5939e-12
ENSGALG00000032456	65558.8	435501	-2.7318	8.058e-14	2.6198e-12
ENSGALG00000013244	491.521	3405.03	-2.7923	8.1023e-14	2.6306e-12
ENSGALG00000034109	246.146	21.4071	3.5234	8.1916e-14	2.6561e-12
ENSGALG00000006591	2960.6	142823	-5.5922	8.2065e-14	2.6573e-12
ENSGALG00000039448	1222.21	170.86	2.8386	8.4841e-14	2.7435e-12
ENSGALG00000009212	475.129	54.4229	3.126	8.5657e-14	2.7662e-12
ENSGALG00000043355	993.344	134.579	2.8838	8.6606e-14	2.7931e-12
ENSGALG00000036783	2442.95	16852	-2.7862	8.7047e-14	2.8036e-12
ENSGALG00000008420	403.566	5537.68	-3.7784	8.8147e-14	2.8353e-12
ENSGALG00000042418	276.587	25.0391	3.4655	9.0195e-14	2.8973e-12
ENSGALG00000030436	9439.89	63126.9	-2.7414	9.5245e-14	3.0514e-12
ENSGALG00000041246	790.263	104.253	2.9222	9.5213e-14	3.0514e-12
ENSGALG00000040702	576.452	3821.43	-2.7288	9.7243e-14	3.1113e-12
ENSGALG00000036625	1383.2	9345.58	-2.7563	9.7453e-14	3.1139e-12
ENSGALG00000033002	2606.58	391.001	2.7369	9.8839e-14	3.154e-12
ENSGALG00000003862	306.668	2177.22	-2.8277	9.926e-14	3.1632e-12
ENSGALG00000043583	275.681	25.7391	3.421	9.9479e-14	3.166e-12
Novel03087	1263.46	8544.41	-2.7576	1.0113e-13	3.2143e-12
ENSGALG00000038768	1220.44	171.454	2.8315	1.0236e-13	3.2492e-12
ENSGALG00000018288	1.95244	82.5433	-5.4018	1.0688e-13	3.3881e-12
ENSGALG00000004801	944.158	7088.03	-2.9083	1.0948e-13	3.4662e-12
ENSGALG00000030047	741.066	4919.97	-2.731	1.1059e-13	3.4967e-12
ENSGALG00000028352	1561.76	226.32	2.7867	1.1108e-13	3.5076e-12
ENSGALG00000041812	3962.22	25909.8	-2.7091	1.1126e-13	3.5087e-12
ENSGALG00000000629	907.17	5976.53	-2.7199	1.1643e-13	3.6669e-12
ENSGALG00000042771	386.816	2618.89	-2.7592	1.2225e-13	3.8452e-12
ENSGALG00000011803	2722.69	412.087	2.724	1.2444e-13	3.909e-12
ENSGALG00000035933	65.8815	0	Inf	1.3079e-13	4.1031e-12
ENSGALG00000036500	357.056	0.414111	9.7519	1.3314e-13	4.1714e-12
ENSGALG00000001633	220.364	1571.75	-2.8344	1.3887e-13	4.3453e-12
ENSGALG00000011324	128.247	953.256	-2.8939	1.4089e-13	4.4027e-12
ENSGALG00000014999	462.298	55.3708	3.0616	1.4843e-13	4.6325e-12
ENSGALG00000003205	2874.25	18416.1	-2.6797	1.4871e-13	4.635e-12
ENSGALG00000008301	57.9373	469.677	-3.0191	1.5156e-13	4.7179e-12
ENSGALG00000013640	245.421	2798.02	-3.5111	1.5333e-13	4.7669e-12
Novel00504	6.82281	129.044	-4.2414	1.5664e-13	4.8636e-12
ENSGALG00000016309	428.737	12623.7	-4.8799	1.5707e-13	4.8705e-12
ENSGALG00000002705	1653.29	10807.8	-2.7087	1.5736e-13	4.8734e-12
ENSGALG00000005005	109.958	817.171	-2.8937	1.6199e-13	5.0104e-12
ENSGALG00000032079	55673.8	358712	-2.6878	1.6458e-13	5.084e-12
ENSGALG00000003496	249.649	1718.72	-2.7834	1.6903e-13	5.2132e-12
ENSGALG00000008609	8719.39	1369.1	2.671	1.692e-13	5.2132e-12
ENSGALG00000016105	1504.44	9955.13	-2.7262	1.7262e-13	5.3117e-12
ENSGALG00000024271	1477.17	9369.56	-2.6652	1.7835e-13	5.4811e-12
ENSGALG00000035978	1680.6	249.429	2.7523	1.7987e-13	5.5208e-12
ENSGALG00000012220	303.262	31.0112	3.2897	2.1117e-13	6.4732e-12
ENSGALG00000017282	1610.87	10324.7	-2.6802	2.1676e-13	6.6322e-12
ENSGALG00000033344	587.899	77.0564	2.9316	2.169e-13	6.6322e-12
ENSGALG00000042275	301.372	25.4981	3.5631	2.1718e-13	6.6324e-12
ENSGALG00000042308	427.669	50.602	3.0792	2.2458e-13	6.8497e-12
ENSGALG00000041738	242.327	22.0607	3.4574	2.2776e-13	6.9379e-12
ENSGALG00000001632	386.164	43.1159	3.1629	2.3027e-13	7.0056e-12
ENSGALG00000022813	1359.9	8695.94	-2.6768	2.3259e-13	7.0671e-12
ENSGALG00000004240	83.1432	637.048	-2.9377	2.3331e-13	7.0801e-12
ENSGALG00000009089	181.113	4018.14	-4.4716	2.3423e-13	7.0992e-12
Novel01131	486.622	60.2547	3.0137	2.4398e-13	7.3855e-12
Novel03023	381.188	4.42754	6.4279	2.4601e-13	7.4375e-12
ENSGALG00000035716	63.7658	0	Inf	2.5491e-13	7.6969e-12
ENSGALG00000042721	1309.03	12.6295	6.6955	2.625e-13	7.9164e-12
ENSGALG00000011498	367.179	2426.04	-2.7241	2.6287e-13	7.9174e-12
ENSGALG00000033753	391.769	2887.28	-2.8816	2.6644e-13	8.0152e-12
ENSGALG00000010623	230.502	20.5799	3.4855	2.7046e-13	8.126e-12
ENSGALG00000004247	12.5878	167.559	-3.7346	2.712e-13	8.1382e-12
Novel00726	942.078	134.525	2.808	2.7305e-13	8.1834e-12
ENSGALG00000016456	91.8554	1236.56	-3.7508	2.7782e-13	8.3161e-12
ENSGALG00000026875	131.199	4522.11	-5.1072	2.8038e-13	8.372e-12
Novel01675	693.142	4456.84	-2.6848	2.8021e-13	8.372e-12
ENSGALG00000011914	290.145	29.244	3.3106	2.9398e-13	8.7672e-12
ENSGALG00000033902	21.2362	1143.34	-5.7506	3.089e-13	9.2009e-12
ENSGALG00000010051	64.6989	519.484	-3.0053	3.2951e-13	9.8024e-12
Novel00173	85.0617	0	Inf	3.4542e-13	1.0263e-11
ENSGALG00000001316	792.863	111.907	2.8248	3.4687e-13	1.0294e-11
ENSGALG00000032736	566.838	3778.58	-2.7368	3.4805e-13	1.0316e-11
ENSGALG00000023793	274.102	27.5506	3.3146	3.4874e-13	1.0324e-11
ENSGALG00000008864	2698.96	17209.8	-2.6728	3.5663e-13	1.0545e-11
ENSGALG00000027688	1800.38	11241	-2.6424	3.6188e-13	1.0686e-11
ENSGALG00000037233	114.971	0.462114	7.9588	3.6415e-13	1.074e-11
ENSGALG00000002346	538.086	68.999	2.9632	3.6911e-13	1.0873e-11
ENSGALG00000009446	42.6496	1401.2	-5.038	3.781e-13	1.1125e-11
ENSGALG00000041263	162.989	10.971	3.893	3.8649e-13	1.1358e-11
ENSGALG00000006525	297.654	31.2354	3.2524	4.0003e-13	1.1741e-11
ENSGALG00000014261	865.833	121.086	2.8381	4.1118e-13	1.2054e-11
ENSGALG00000030643	606.108	81.1907	2.9002	4.2775e-13	1.2525e-11
ENSGALG00000031906	62.1122	0	Inf	4.3347e-13	1.2677e-11
Novel03034	499.835	63.9954	2.9654	4.4114e-13	1.2885e-11
ENSGALG00000038787	13.9125	173.268	-3.6385	4.4568e-13	1.3002e-11
Novel01209	208.199	17.6163	3.563	4.5012e-13	1.3116e-11
ENSGALG00000031159	158.728	1106.59	-2.8015	4.8045e-13	1.3983e-11
ENSGALG00000026716	149.54	9.22171	4.0194	4.8539e-13	1.411e-11
ENSGALG00000027835	401.083	49.0658	3.0311	5.1347e-13	1.4908e-11
ENSGALG00000010785	335.44	2139.45	-2.6731	5.166e-13	1.4981e-11
ENSGALG00000033971	742.669	84.9114	3.1287	5.2032e-13	1.507e-11
ENSGALG00000009492	351.924	2238.73	-2.6693	5.4161e-13	1.565e-11
ENSGALG00000032313	2489.57	256.184	3.2806	5.4127e-13	1.565e-11
ENSGALG00000007349	65.6658	531.354	-3.0165	5.8162e-13	1.6786e-11
ENSGALG00000011016	532.164	18039.9	-5.0832	5.8926e-13	1.6986e-11
ENSGALG00000031152	429.312	52.5027	3.0316	5.9211e-13	1.7048e-11
ENSGALG00000006572	5365.37	221645	-5.3684	5.9516e-13	1.7115e-11
ENSGALG00000040161	180.212	1216.37	-2.7548	5.9977e-13	1.7227e-11
ENSGALG00000008538	642.692	87.9267	2.8698	6.0145e-13	1.7255e-11
ENSGALG00000013912	85.9822	0.414111	7.6979	6.0919e-13	1.7456e-11
ENSGALG00000016323	993.747	9952.95	-3.3242	6.1638e-13	1.7641e-11
ENSGALG00000005476	180.411	13.6967	3.7194	6.1747e-13	1.7652e-11
Novel02034	130.883	2.26098	5.8552	6.29e-13	1.796e-11
Novel00908	739.201	87.5764	3.0774	6.4811e-13	1.8484e-11
ENSGALG00000028759	109.027	4.47554	4.6065	6.5362e-13	1.8619e-11
ENSGALG00000007570	101.143	3.55131	4.8319	6.9086e-13	1.9656e-11
ENSGALG00000014789	301.793	1965.39	-2.7032	6.9397e-13	1.9722e-11
ENSGALG00000023834	842.254	5621.15	-2.7385	7.2042e-13	2.0449e-11
ENSGALG00000014447	232.105	1509.87	-2.7016	7.234e-13	2.051e-11
ENSGALG00000000424	3114.7	508.61	2.6145	7.3073e-13	2.0693e-11
ENSGALG00000016497	395.364	2526.93	-2.6761	7.3469e-13	2.0781e-11
ENSGALG00000016034	681.296	4246.53	-2.6399	7.4888e-13	2.1158e-11
ENSGALG00000041401	2315.62	14027.4	-2.5988	7.556e-13	2.1323e-11
ENSGALG00000005038	451.453	57.0679	2.9838	7.584e-13	2.1377e-11
ENSGALG00000011514	6428.19	38715.6	-2.5904	7.606e-13	2.1414e-11
ENSGALG00000040833	591.953	79.8308	2.8905	7.7777e-13	2.1872e-11
ENSGALG00000019802	184.703	8.24948	4.4848	7.9149e-13	2.2232e-11
Novel00714	3699.83	22250.9	-2.5883	7.9248e-13	2.2234e-11
Novel02961	270.734	28.1489	3.2657	7.9528e-13	2.2286e-11
ENSGALG00000016438	347.581	40.5927	3.0981	8.1916e-13	2.2929e-11
ENSGALG00000043743	157.401	1402.05	-3.155	8.2684e-13	2.3117e-11
ENSGALG00000010170	593.85	54.598	3.4432	8.3505e-13	2.332e-11
ENSGALG00000039687	60.6201	0	Inf	8.4924e-13	2.3689e-11
ENSGALG00000029261	3436.56	21398.4	-2.6385	8.6291e-13	2.4042e-11
ENSGALG00000011958	314.824	1996.42	-2.6648	8.9263e-13	2.4841e-11
ENSGALG00000009562	168.679	0.828221	7.6701	9.3061e-13	2.5869e-11
ENSGALG00000013165	1380.55	8471.68	-2.6174	9.3593e-13	2.5987e-11
Novel01927	7.37452	231.373	-4.9715	9.4282e-13	2.6148e-11
ENSGALG00000012577	117.195	1702.44	-3.8606	9.5933e-13	2.6575e-11
ENSGALG00000031099	6094.54	36463.6	-2.5809	9.7491e-13	2.6976e-11
ENSGALG00000003881	427.479	54.6756	2.9669	9.7617e-13	2.698e-11
ENSGALG00000029172	1004.52	6059.05	-2.5926	9.9433e-13	2.745e-11
ENSGALG00000035211	334.106	3632.49	-3.4426	1.0243e-12	2.8246e-11
ENSGALG00000035938	9.41318	240.911	-4.6777	1.0256e-12	2.8249e-11
ENSGALG00000003521	8498.2	103171	-3.6017	1.0395e-12	2.8598e-11
ENSGALG00000000529	1288.56	151.889	3.0847	1.063e-12	2.9213e-11
ENSGALG00000010098	1701.3	277.649	2.6153	1.0938e-12	3.0025e-11
ENSGALG00000029917	1518.1	11080.1	-2.8676	1.1059e-12	3.0324e-11
Novel01983	230.656	21.6518	3.4132	1.1403e-12	3.123e-11
Novel00197	17.4339	194.684	-3.4812	1.1707e-12	3.2028e-11
ENSGALG00000001375	324.35	2036.04	-2.6501	1.1854e-12	3.2393e-11
Novel01214	59.3526	0	Inf	1.1886e-12	3.2441e-11
ENSGALG00000002008	72.3982	0.924228	6.2916	1.2055e-12	3.2835e-11
ENSGALG00000006861	524.352	3190.57	-2.6052	1.2057e-12	3.2835e-11
ENSGALG00000008953	366.794	2253.96	-2.6194	1.2192e-12	3.3166e-11
ENSGALG00000030425	1.98376	851.293	-8.7453	1.2438e-12	3.3796e-11
ENSGALG00000006246	603.538	3727.23	-2.6266	1.246e-12	3.3819e-11
ENSGALG00000007160	21.2498	212.643	-3.3229	1.2652e-12	3.4302e-11
ENSGALG00000016342	2191.63	53443.3	-4.6079	1.3113e-12	3.5512e-11
ENSGALG00000031274	286.859	31.1352	3.2037	1.3171e-12	3.5627e-11
ENSGALG00000041373	152.564	10.8913	3.8082	1.3456e-12	3.6357e-11
ENSGALG00000035605	80.431	598.259	-2.8949	1.353e-12	3.6517e-11
ENSGALG00000016826	2192.48	14271	-2.7025	1.366e-12	3.6828e-11
ENSGALG00000036229	32709.8	195984	-2.5829	1.3709e-12	3.6917e-11
ENSGALG00000009495	1973.05	21.1807	6.5415	1.3823e-12	3.7182e-11
ENSGALG00000035223	993.689	5950.72	-2.5822	1.4145e-12	3.8008e-11
ENSGALG00000008702	66.4112	0.462114	7.167	1.4275e-12	3.8315e-11
ENSGALG00000034020	748.107	109.011	2.7788	1.4322e-12	3.8397e-11
ENSGALG00000015480	1658.97	265.8	2.6419	1.4575e-12	3.9031e-11
ENSGALG00000012809	612.577	5146.14	-3.0705	1.4845e-12	3.9712e-11
ENSGALG00000010949	451.986	0	Inf	1.5165e-12	4.0522e-11
ENSGALG00000032619	634.017	20901.1	-5.0429	1.5326e-12	4.0907e-11
ENSGALG00000023933	208.321	13366.8	-6.0037	1.5516e-12	4.1368e-11
ENSGALG00000036165	0.630068	57.8898	-6.5217	1.5903e-12	4.2354e-11
ENSGALG00000011630	1805.2	292.29	2.6267	1.5944e-12	4.2417e-11
Novel00650	2007.94	331.228	2.5998	1.6585e-12	4.4074e-11
ENSGALG00000037328	2808.68	466.199	2.5909	1.6652e-12	4.4202e-11
ENSGALG00000012613	208.247	15.5605	3.7423	1.705e-12	4.521e-11
ENSGALG00000016281	1431.75	8888.02	-2.6341	1.7162e-12	4.5456e-11
ENSGALG00000002645	122.134	6.83464	4.1595	1.7372e-12	4.5964e-11
ENSGALG00000040229	704.167	102.786	2.7763	1.7471e-12	4.6173e-11
ENSGALG00000033416	564.941	78.1838	2.8532	1.7577e-12	4.6403e-11
ENSGALG00000027742	19.162	803.866	-5.3906	1.8062e-12	4.7632e-11
ENSGALG00000015372	1322.58	12490	-3.2393	1.8104e-12	4.7685e-11
ENSGALG00000034735	582.463	3477.86	-2.578	1.8122e-12	4.7685e-11
ENSGALG00000001918	140.921	1359.34	-3.27	1.9121e-12	5.0261e-11
ENSGALG00000031427	141.428	9.55721	3.8873	1.9513e-12	5.1234e-11
ENSGALG00000021542	159.201	11.8019	3.7538	2.0152e-12	5.2854e-11
Novel00276	93.5704	3.23427	4.8545	2.0218e-12	5.297e-11
ENSGALG00000009157	409.904	53.1516	2.9471	2.033e-12	5.3205e-11
ENSGALG00000025764	6171.02	290.515	4.4088	2.0756e-12	5.4263e-11
ENSGALG00000006507	728.73	108.234	2.7512	2.0845e-12	5.4436e-11
ENSGALG00000021213	723.832	4342.01	-2.5846	2.1887e-12	5.7095e-11
Novel01146	307.587	1899.94	-2.6269	2.2708e-12	5.9174e-11
ENSGALG00000043799	362.539	45.3093	3.0003	2.3344e-12	6.0765e-11
ENSGALG00000005400	137.84	8.66201	3.9922	2.3632e-12	6.1448e-11
ENSGALG00000039320	37.6796	493.669	-3.7117	2.3676e-12	6.1496e-11
ENSGALG00000015435	1419	9034.04	-2.6705	2.4424e-12	6.3372e-11
ENSGALG00000037453	552.665	78.1885	2.8214	2.5911e-12	6.7156e-11
ENSGALG00000004759	269.468	1659.19	-2.6223	2.6105e-12	6.7587e-11
Novel02431	206.504	1283.26	-2.6356	2.6919e-12	6.962e-11
ENSGALG00000032955	303.092	36.0871	3.0702	2.7319e-12	7.058e-11
ENSGALG00000009748	1037.42	165.849	2.645	2.8303e-12	7.3043e-11
ENSGALG00000038688	926.67	31.2307	4.891	2.8702e-12	7.3994e-11
Novel02775	1202.96	128.927	3.222	2.8818e-12	7.4215e-11
ENSGALG00000008875	162.315	1243.88	-2.938	2.9864e-12	7.6825e-11
ENSGALG00000030687	448.61	6.73546	6.0575	3.2819e-12	8.4299e-11
ENSGALG00000031615	106.952	4.88806	4.4516	3.2839e-12	8.4299e-11
ENSGALG00000030022	464.733	63.6583	2.868	3.3222e-12	8.5192e-11
ENSGALG00000032777	1202.6	7142.58	-2.5703	3.3392e-12	8.5537e-11
ENSGALG00000016875	80.5254	843.268	-3.3885	3.3669e-12	8.6157e-11
ENSGALG00000041918	417.674	0.461585	9.8216	3.4446e-12	8.805e-11
ENSGALG00000037864	205.603	5770.91	-4.8109	3.5597e-12	9.0896e-11
ENSGALG00000015729	799.395	124.474	2.6831	3.6733e-12	9.3699e-11
ENSGALG00000006431	592.823	3436.6	-2.5353	3.6949e-12	9.415e-11
ENSGALG00000027454	458.463	63.2479	2.8577	3.8403e-12	9.7752e-11
Novel02865	18.0021	427.167	-4.5686	3.9664e-12	1.0085e-10
ENSGALG00000034132	172.96	14.4274	3.5836	4.0312e-12	1.0239e-10
ENSGALG00000011116	516.877	72.7714	2.8284	4.1502e-12	1.0531e-10
ENSGALG00000004257	84.4028	588.817	-2.8025	4.1807e-12	1.0597e-10
ENSGALG00000008597	1261.84	7202.05	-2.5129	4.1894e-12	1.0608e-10
Novel01187	144.676	9.95499	3.8613	4.262e-12	1.078e-10
ENSGALG00000009050	154.854	4399.58	-4.8284	4.3002e-12	1.0866e-10
Novel02501	257.847	21147.5	-6.3578	4.3926e-12	1.1088e-10
ENSGALG00000035051	68.7801	0.923699	6.2184	4.619e-12	1.1647e-10
ENSGALG00000040267	767.722	4474.9	-2.5432	4.6644e-12	1.1749e-10
ENSGALG00000016830	219.212	1334.48	-2.6059	4.7842e-12	1.2038e-10
ENSGALG00000032718	73.7464	1.29033	5.8368	4.8137e-12	1.21e-10
ENSGALG00000042750	38628.5	220369	-2.5122	4.8287e-12	1.2125e-10
Novel01595	2155.69	321.196	2.7466	4.8336e-12	1.2125e-10
ENSGALG00000010745	5057.15	915.099	2.4663	4.8579e-12	1.2173e-10
ENSGALG00000033834	344.492	42.9735	3.003	5.0616e-12	1.267e-10
ENSGALG00000039209	532.369	7.0578	6.2371	5.1366e-12	1.2845e-10
ENSGALG00000015846	237.014	15.5763	3.9275	5.25e-12	1.3115e-10
ENSGALG00000030902	1967.2	334.595	2.5557	5.3949e-12	1.3463e-10
ENSGALG00000005077	18.6194	626.185	-5.0717	5.569e-12	1.3883e-10
ENSGALG00000010542	2232.72	383.47	2.5416	5.5791e-12	1.3894e-10
ENSGALG00000029697	11.7468	3414.92	-8.1834	5.7477e-12	1.4299e-10
ENSGALG00000004168	1148.08	6626.64	-2.5291	5.8438e-12	1.4523e-10
ENSGALG00000011275	300.255	36.2037	3.052	5.9623e-12	1.4802e-10
ENSGALG00000030879	321.539	2548.96	-2.9868	6.1668e-12	1.5294e-10
Novel00340	61.278	0.461585	7.0526	6.2396e-12	1.5459e-10
ENSGALG00000005754	4.55867	1037.53	-7.8303	6.3956e-12	1.5829e-10
ENSGALG00000042863	480.962	3602.08	-2.9048	6.4286e-12	1.5894e-10
Novel02824	323.566	29.5763	3.4515	6.453e-12	1.5938e-10
ENSGALG00000010029	21.4571	972.079	-5.5015	6.4811e-12	1.5992e-10
ENSGALG00000010195	644.509	98.6255	2.7082	6.5329e-12	1.6103e-10
ENSGALG00000000399	45.9245	535.245	-3.5429	6.5582e-12	1.6149e-10
ENSGALG00000002277	347.533	5320.02	-3.9362	6.5861e-12	1.6201e-10
ENSGALG00000036458	131.375	839.458	-2.6758	6.6988e-12	1.6462e-10
ENSGALG00000015079	461.656	8.21569	5.8123	6.723e-12	1.6504e-10
ENSGALG00000026847	624.84	3583.64	-2.5199	6.8772e-12	1.6866e-10
ENSGALG00000027963	1433.98	16149.6	-3.4934	7.3048e-12	1.7896e-10
ENSGALG00000016739	3630.77	19956.8	-2.4585	7.3821e-12	1.8067e-10
ENSGALG00000025996	923.107	151.89	2.6035	7.5178e-12	1.838e-10
ENSGALG00000012544	571.003	50.6574	3.4947	7.7226e-12	1.8862e-10
ENSGALG00000032270	737.725	116.026	2.6686	8.1881e-12	1.9979e-10
Novel03042	415.375	2413.9	-2.5389	8.3796e-12	2.0426e-10
ENSGALG00000007668	430.027	60.4188	2.8314	8.3947e-12	2.0442e-10
ENSGALG00000015338	275.506	1616.65	-2.5529	8.5354e-12	2.0763e-10
Novel01616	0.272257	46.4441	-7.4144	8.5759e-12	2.0841e-10
ENSGALG00000007493	183.042	17.1557	3.4154	8.6924e-12	2.1103e-10
ENSGALG00000032385	55.424	6965.48	-6.9736	8.8359e-12	2.143e-10
ENSGALG00000003045	1397.12	240.962	2.5356	9.0067e-12	2.1822e-10
Novel00580	5052.12	909.613	2.4736	9.1175e-12	2.2068e-10
ENSGALG00000014646	562.272	83.0455	2.7593	9.1466e-12	2.2117e-10
ENSGALG00000031890	5381.15	30167.3	-2.487	9.2101e-12	2.2248e-10
ENSGALG00000032875	2571.99	14137.3	-2.4585	9.2976e-12	2.2437e-10
ENSGALG00000022871	157.075	13.4757	3.543	9.4569e-12	2.2799e-10
ENSGALG00000040794	215.709	22.6046	3.2544	9.505e-12	2.2892e-10
ENSGALG00000007205	3905.04	41853.2	-3.4219	9.638e-12	2.3189e-10
ENSGALG00000013569	4923.06	849.095	2.5356	9.7459e-12	2.3425e-10
ENSGALG00000030836	124.302	8.02633	3.953	9.9649e-12	2.3928e-10
ENSGALG00000003135	1438.84	8210.81	-2.5126	1.0318e-11	2.4751e-10
ENSGALG00000011721	79.108	2.26204	5.1281	1.0558e-11	2.5301e-10
Novel02874	86.9067	3.23162	4.7491	1.0732e-11	2.5693e-10
ENSGALG00000033428	1039.05	177.589	2.5487	1.094e-11	2.6164e-10
ENSGALG00000011013	111.354	6.17999	4.1714	1.0965e-11	2.6199e-10
ENSGALG00000039595	522.693	79.7099	2.7131	1.1087e-11	2.6464e-10
ENSGALG00000030272	365.45	2198.12	-2.5885	1.1991e-11	2.8593e-10
ENSGALG00000002515	1598.22	201.363	2.9886	1.2037e-11	2.8675e-10
ENSGALG00000012715	492.39	2924.64	-2.5704	1.2406e-11	2.9525e-10
ENSGALG00000026590	24.6799	218.732	-3.1478	1.2469e-11	2.9646e-10
ENSGALG00000012659	3089.07	556.748	2.4721	1.2689e-11	3.0139e-10
ENSGALG00000043568	52.2612	715.066	-3.7743	1.2839e-11	3.0466e-10
ENSGALG00000005792	85.8033	558.701	-2.703	1.2977e-11	3.0764e-10
ENSGALG00000009036	258.465	1500.23	-2.5371	1.325e-11	3.138e-10
ENSGALG00000004343	20.0025	448.549	-4.487	1.3375e-11	3.1645e-10
ENSGALG00000040626	965.992	5312.73	-2.4594	1.3619e-11	3.2189e-10
ENSGALG00000014883	268.12	32.1064	3.0619	1.3768e-11	3.2487e-10
ENSGALG00000032142	200891	1.09043e+06	-2.4404	1.3771e-11	3.2487e-10
ENSGALG00000029617	1642.09	5.76588	8.1538	1.3787e-11	3.2493e-10
ENSGALG00000038848	420.023	1.84634	7.8297	1.3827e-11	3.2554e-10
ENSGALG00000036840	221.993	4539.88	-4.3541	1.3937e-11	3.2781e-10
ENSGALG00000014227	70.4721	0.875695	6.3305	1.4296e-11	3.3594e-10
ENSGALG00000005237	1075.19	180.975	2.5707	1.468e-11	3.4462e-10
ENSGALG00000026754	372.761	0	Inf	1.4772e-11	3.4644e-10
ENSGALG00000015628	90.2533	2.11856	5.4128	1.4845e-11	3.4782e-10
ENSGALG00000005811	287.359	0.875695	8.3582	1.4869e-11	3.4804e-10
ENSGALG00000029845	593.111	12110	-4.3517	1.4916e-11	3.4849e-10
ENSGALG00000037603	278.128	2761.37	-3.3116	1.4917e-11	3.4849e-10
ENSGALG00000006292	238.562	1380.2	-2.5324	1.5185e-11	3.5441e-10
ENSGALG00000042375	102.41	5.2547	4.2846	1.5241e-11	3.5538e-10
ENSGALG00000016124	1563.38	8525.16	-2.4471	1.528e-11	3.5593e-10
Novel01153	117.13	968.86	-3.0482	1.5433e-11	3.5916e-10
ENSGALG00000006658	294.819	37.0319	2.993	1.5751e-11	3.662e-10
ENSGALG00000032394	3505.58	19004	-2.4386	1.5927e-11	3.6958e-10
ENSGALG00000041091	61518.1	334530	-2.4431	1.5913e-11	3.6958e-10
ENSGALG00000021884	119	7.51833	3.9844	1.6022e-11	3.7143e-10
ENSGALG00000004833	5423.94	577.527	3.2314	1.6078e-11	3.7237e-10
ENSGALG00000016300	23.197	712.905	-4.9417	1.6458e-11	3.8081e-10
ENSGALG00000002564	285.4	1637.7	-2.5206	1.6681e-11	3.8558e-10
ENSGALG00000008861	64.2351	0.923699	6.1198	1.6733e-11	3.8643e-10
ENSGALG00000000584	1010.83	170.423	2.5683	1.6973e-11	3.9159e-10
ENSGALG00000016017	68.855	460.233	-2.7407	1.7069e-11	3.9344e-10
ENSGALG00000034704	275.451	33.8921	3.0228	1.7226e-11	3.9667e-10
ENSGALG00000016304	339.705	45.1358	2.9119	1.8127e-11	4.1702e-10
ENSGALG00000038316	492.752	2770.02	-2.491	1.8832e-11	4.3284e-10
ENSGALG00000000367	81.4654	2.77163	4.8774	1.9069e-11	4.3786e-10
ENSGALG00000034742	2156.11	393.142	2.4553	1.9516e-11	4.477e-10
ENSGALG00000001256	60.3653	412.772	-2.7736	1.981e-11	4.5402e-10
ENSGALG00000016324	227.879	17.0281	3.7423	2.0458e-11	4.6842e-10
ENSGALG00000013035	39.4486	311.369	-2.9806	2.0738e-11	4.7439e-10
ENSGALG00000029734	52.1467	0	Inf	2.0837e-11	4.762e-10
ENSGALG00000008902	15.1727	280.57	-4.2088	2.1127e-11	4.8236e-10
ENSGALG00000035476	511.035	78.2059	2.7081	2.1472e-11	4.8979e-10
ENSGALG00000015783	2299.07	12350.7	-2.4255	2.1733e-11	4.9527e-10
ENSGALG00000039634	161.361	14.8119	3.4455	2.252e-11	5.1272e-10
ENSGALG00000036447	486.845	74.4473	2.7092	2.3e-11	5.2315e-10
ENSGALG00000016565	58.4855	0.462114	6.9837	2.3452e-11	5.3293e-10
ENSGALG00000029500	40510	216360	-2.4171	2.4053e-11	5.4607e-10
ENSGALG00000010294	414.654	61.4021	2.7555	2.4197e-11	5.4883e-10
ENSGALG00000027069	565.649	5778.08	-3.3526	2.4309e-11	5.5086e-10
ENSGALG00000015219	94.395	4.37901	4.43	2.4391e-11	5.522e-10
Novel00318	962.862	6815.74	-2.8235	2.455e-11	5.5526e-10
ENSGALG00000023444	51.4607	0	Inf	2.5262e-11	5.7085e-10
ENSGALG00000007216	80.3568	2.72203	4.8837	2.6074e-11	5.8865e-10
ENSGALG00000030556	79.6138	0.828221	6.5869	2.637e-11	5.9476e-10
ENSGALG00000020505	189.546	2365.76	-3.6417	2.6833e-11	6.0464e-10
ENSGALG00000034652	29.3055	230.786	-2.9773	2.7021e-11	6.0831e-10
ENSGALG00000026315	2183.53	398.794	2.4529	2.7193e-11	6.1141e-10
ENSGALG00000037050	3642.99	129980	-5.157	2.7209e-11	6.1141e-10
ENSGALG00000029596	367.961	52.6978	2.8037	2.7419e-11	6.1555e-10
ENSGALG00000001506	529.76	83.7265	2.6616	2.7487e-11	6.165e-10
Novel01237	58.0289	0.461585	6.974	2.7791e-11	6.2275e-10
ENSGALG00000003362	470.582	2605.54	-2.4691	2.8524e-11	6.3858e-10
ENSGALG00000036856	2213.71	406.735	2.4443	2.867e-11	6.4125e-10
ENSGALG00000015459	496.811	76.299	2.703	2.9013e-11	6.4832e-10
Novel00512	2.12395	147.433	-6.1172	2.9178e-11	6.514e-10
ENSGALG00000041471	18249.1	3543.53	2.3646	2.9303e-11	6.5359e-10
ENSGALG00000006221	256.936	31.7239	3.0178	2.9368e-11	6.5444e-10
ENSGALG00000004893	4255.31	685.344	2.6344	2.9423e-11	6.5505e-10
ENSGALG00000037414	82.1374	515.555	-2.65	2.9904e-11	6.6516e-10
ENSGALG00000011309	321.185	44.068	2.8656	3.0453e-11	6.7674e-10
ENSGALG00000014681	10.3008	124.65	-3.597	3.0939e-11	6.8691e-10
ENSGALG00000013211	96.1807	4.93766	4.2838	3.1401e-11	6.9653e-10
ENSGALG00000036548	12.4956	138.935	-3.4749	3.2268e-11	7.151e-10
ENSGALG00000028236	2324.44	47.8784	5.6014	3.2657e-11	7.2307e-10
Novel00982	57.3914	0.461585	6.9581	3.2709e-11	7.2355e-10
ENSGALG00000037029	93.3112	2214.29	-4.5687	3.2907e-11	7.2726e-10
ENSGALG00000033737	156.474	912.522	-2.5439	3.3718e-11	7.445e-10
ENSGALG00000029380	12.7655	144.078	-3.4965	3.4233e-11	7.5518e-10
ENSGALG00000026757	449.09	68.6128	2.7105	3.4677e-11	7.6428e-10
Novel01609	216.706	24.2884	3.1574	3.5665e-11	7.8535e-10
ENSGALG00000042866	18.3157	172.427	-3.2348	3.5704e-11	7.8549e-10
Novel00458	227.254	27.0764	3.0692	3.6134e-11	7.9423e-10
ENSGALG00000041086	747.851	3922.3	-2.3909	3.7018e-11	8.129e-10
Novel02814	987.62	5260.01	-2.413	3.7115e-11	8.143e-10
ENSGALG00000032558	98.9987	5.4003	4.1963	3.7499e-11	8.2198e-10
ENSGALG00000013793	117.188	695.253	-2.5687	3.772e-11	8.2609e-10
Novel02203	78.7988	2.77057	4.8299	3.8207e-11	8.3598e-10
ENSGALG00000032398	2796.63	532.787	2.3921	3.8409e-11	8.3964e-10
ENSGALG00000043389	104.306	631.296	-2.5975	4.1409e-11	9.044e-10
ENSGALG00000013293	8.11426	115.496	-3.8312	4.1999e-11	9.1647e-10
ENSGALG00000030712	18756.4	629.175	4.8978	4.2432e-11	9.2508e-10
ENSGALG00000006045	203.255	23.7746	3.0958	4.6239e-11	1.0072e-09
ENSGALG00000002756	353.596	13.826	4.6766	4.7293e-11	1.0292e-09
ENSGALG00000015010	224.854	25.6389	3.1326	4.7356e-11	1.0296e-09
ENSGALG00000041729	11.2346	130.627	-3.5394	4.8923e-11	1.0628e-09
ENSGALG00000014995	238.053	3510.3	-3.8822	4.9644e-11	1.0775e-09
ENSGALG00000038519	2408.24	456.93	2.3979	5.1245e-11	1.1112e-09
ENSGALG00000015519	378.21	7.97726	5.5671	5.1468e-11	1.114e-09
ENSGALG00000034272	215.329	25.1826	3.096	5.1449e-11	1.114e-09
ENSGALG00000005413	399.375	0.461585	9.7569	5.1993e-11	1.1244e-09
ENSGALG00000005844	185.68	11.2622	4.0433	5.2505e-11	1.1345e-09
ENSGALG00000038714	2007.96	10169	-2.3404	5.3203e-11	1.1485e-09
ENSGALG00000039344	377.962	0.414111	9.834	5.4715e-11	1.1801e-09
ENSGALG00000017185	1473.75	268.521	2.4564	5.4789e-11	1.1806e-09
ENSGALG00000007364	764.6	4008.58	-2.3903	5.6087e-11	1.2065e-09
ENSGALG00000034438	192.372	15.3189	3.6505	5.6091e-11	1.2065e-09
ENSGALG00000026507	398.298	2093.05	-2.3937	5.7471e-11	1.2351e-09
ENSGALG00000032845	1.26014	328.473	-8.026	5.7829e-11	1.2417e-09
ENSGALG00000004852	1319.63	237.844	2.4721	5.8739e-11	1.2601e-09
ENSGALG00000035996	1844.5	9487.24	-2.3628	5.9983e-11	1.2857e-09
ENSGALG00000006588	96.9199	5.30482	4.1914	6.0535e-11	1.2963e-09
ENSGALG00000006175	136.304	11.4342	3.5754	6.1286e-11	1.3113e-09
ENSGALG00000029632	271.667	34.5784	2.9739	6.199e-11	1.3252e-09
ENSGALG00000004088	557.36	2950.87	-2.4045	6.2361e-11	1.3307e-09
ENSGALG00000005280	598.646	3128.57	-2.3857	6.2331e-11	1.3307e-09
ENSGALG00000030597	1122.96	204.839	2.4547	6.2456e-11	1.3316e-09
ENSGALG00000026119	400.043	2204.6	-2.4623	6.3879e-11	1.3607e-09
ENSGALG00000012348	2296.6	439.561	2.3854	6.5074e-11	1.385e-09
ENSGALG00000001616	747.672	130.09	2.5229	6.6673e-11	1.4177e-09
Novel01250	273.159	0	Inf	6.7523e-11	1.4346e-09
ENSGALG00000035867	49.3323	0	Inf	6.7823e-11	1.4397e-09
ENSGALG00000007082	135.479	941.547	-2.797	6.8082e-11	1.4439e-09
ENSGALG00000040428	666.98	4273.88	-2.6798	6.9277e-11	1.468e-09
ENSGALG00000036098	44.2871	306.034	-2.7887	7.0659e-11	1.4959e-09
ENSGALG00000011347	115.698	8.29801	3.8015	7.0752e-11	1.4966e-09
ENSGALG00000039219	508.074	69.8647	2.8624	7.143e-11	1.5096e-09
ENSGALG00000008945	4192.72	21516.4	-2.3595	7.1735e-11	1.5147e-09
ENSGALG00000034615	153.165	3789.62	-4.6289	7.204e-11	1.5198e-09
Novel01302	0.809175	48.8042	-5.9144	7.3957e-11	1.5589e-09
ENSGALG00000001153	1316.39	241.756	2.445	7.4498e-11	1.5689e-09
ENSGALG00000035525	391.306	2350.82	-2.5868	7.609e-11	1.6011e-09
ENSGALG00000037557	748.154	15535.4	-4.3761	7.6318e-11	1.6045e-09
ENSGALG00000032268	18.1684	165.034	-3.1833	7.6962e-11	1.6166e-09
ENSGALG00000031397	693.797	5920.98	-3.0933	7.7109e-11	1.6183e-09
ENSGALG00000008080	139.783	12.6464	3.4664	7.8312e-11	1.6421e-09
ENSGALG00000011099	842.999	151.23	2.4788	7.9089e-11	1.657e-09
ENSGALG00000027629	772.702	134.122	2.5264	8.0156e-11	1.6779e-09
ENSGALG00000001916	947.592	102.728	3.2054	8.0699e-11	1.6878e-09
ENSGALG00000007993	423.46	29.4403	3.8464	8.1756e-11	1.7084e-09
ENSGALG00000036678	449.573	69.9707	2.6837	8.2312e-11	1.7185e-09
ENSGALG00000038799	258.317	34.0366	2.924	8.2685e-11	1.7248e-09
ENSGALG00000014128	256.954	1466.49	-2.5128	8.2814e-11	1.726e-09
ENSGALG00000037838	4984.08	26625.6	-2.4174	8.4331e-11	1.7561e-09
ENSGALG00000000943	593.81	3098.29	-2.3834	8.5117e-11	1.771e-09
ENSGALG00000003324	3541.47	277.248	3.6751	8.5245e-11	1.7721e-09
ENSGALG00000016293	314.854	37.5241	3.0688	8.7329e-11	1.8139e-09
ENSGALG00000037460	31.4526	351.461	-3.4821	8.8565e-11	1.838e-09
ENSGALG00000031051	3.46151	74.8409	-4.4344	9.0525e-11	1.877e-09
ENSGALG00000001234	28.0832	228.872	-3.0268	9.1736e-11	1.9005e-09
ENSGALG00000012946	1368.21	258.759	2.4026	9.3528e-11	1.936e-09
Novel00894	238.889	31.2301	2.9353	9.4165e-11	1.9475e-09
ENSGALG00000016889	564.298	94.447	2.5789	9.5048e-11	1.964e-09
ENSGALG00000010986	200.923	7.88443	4.6715	9.6369e-11	1.9897e-09
ENSGALG00000007665	318.142	45.7583	2.7976	9.6823e-11	1.9965e-09
ENSGALG00000034312	10.4877	124.371	-3.5679	9.6867e-11	1.9965e-09
ENSGALG00000022926	677.981	118.303	2.5188	9.7186e-11	2.0014e-09
ENSGALG00000032071	72.2981	2.30951	4.9683	9.8919e-11	2.0353e-09
ENSGALG00000035729	260.182	1749.31	-2.7492	9.9132e-11	2.038e-09
ENSGALG00000010583	212.703	10.1106	4.3949	1.0177e-10	2.0904e-09
ENSGALG00000017091	168.056	931.413	-2.4705	1.0319e-10	2.1178e-09
ENSGALG00000008335	662.985	3301.15	-2.3159	1.0364e-10	2.1249e-09
ENSGALG00000010697	370.784	54.6931	2.7611	1.0371e-10	2.1249e-09
ENSGALG00000017163	3159.43	15670.4	-2.3103	1.0496e-10	2.1486e-09
Novel02550	67.934	1.79992	5.2381	1.069e-10	2.1865e-09
ENSGALG00000006969	740.011	3855.92	-2.3815	1.086e-10	2.2194e-09
ENSGALG00000043511	467.183	76.0515	2.6189	1.1251e-10	2.2973e-09
ENSGALG00000013811	556.642	93.1351	2.5794	1.1408e-10	2.3274e-09
ENSGALG00000009837	384.195	59.8838	2.6816	1.1602e-10	2.3651e-09
ENSGALG00000036106	723.634	3615.1	-2.3207	1.1725e-10	2.3881e-09
ENSGALG00000023066	1678.96	8404.58	-2.3236	1.1813e-10	2.4041e-09
Novel00698	399.624	63.5755	2.6521	1.1926e-10	2.425e-09
ENSGALG00000017246	439.163	3299.06	-2.9092	1.197e-10	2.4318e-09
Novel02615	0.754536	48.2281	-5.9981	1.2326e-10	2.502e-09
ENSGALG00000007606	6333.83	46593.5	-2.879	1.2357e-10	2.5062e-09
ENSGALG00000009453	665.808	3441.68	-2.3699	1.2393e-10	2.5114e-09
ENSGALG00000043806	188.253	21.4873	3.1311	1.2516e-10	2.5329e-09
Novel00472	84.6343	4.10943	4.3642	1.252e-10	2.5329e-09
ENSGALG00000014729	191.066	22.0918	3.1125	1.3038e-10	2.6355e-09
ENSGALG00000015786	231.893	2208.06	-3.2512	1.3103e-10	2.6465e-09
ENSGALG00000001557	432.961	2294.43	-2.4058	1.3496e-10	2.7236e-09
ENSGALG00000033781	2033.81	400.38	2.3447	1.3737e-10	2.7699e-09
ENSGALG00000007485	1885.02	9457.81	-2.3269	1.3834e-10	2.7872e-09
ENSGALG00000041154	92.9268	5.44566	4.0929	1.4449e-10	2.9086e-09
ENSGALG00000004956	3537.92	18008.5	-2.3477	1.4604e-10	2.9373e-09
ENSGALG00000006258	155.31	16.0685	3.2728	1.4963e-10	3.0071e-09
ENSGALG00000042242	2129.3	10626.5	-2.3192	1.5263e-10	3.0647e-09
ENSGALG00000009032	115.724	8.80707	3.7159	1.5316e-10	3.0729e-09
ENSGALG00000038290	14762	3012.89	2.2927	1.5363e-10	3.0798e-09
ENSGALG00000041801	36.4385	276.258	-2.9225	1.5459e-10	3.0965e-09
ENSGALG00000010377	63.614	0	Inf	1.5955e-10	3.1932e-09
ENSGALG00000009854	352.025	54.664	2.687	1.6343e-10	3.268e-09
ENSGALG00000004355	478.636	2438.39	-2.3489	1.7213e-10	3.4335e-09
ENSGALG00000008491	205.639	1118.12	-2.4429	1.7191e-10	3.4335e-09
ENSGALG00000012644	622.874	16.1982	5.265	1.7206e-10	3.4335e-09
ENSGALG00000013709	195.035	1046.15	-2.4233	1.7352e-10	3.4583e-09
ENSGALG00000004521	9155.04	45955.6	-2.3276	1.7421e-10	3.4692e-09
ENSGALG00000032984	1698.49	330.98	2.3594	1.7756e-10	3.533e-09
ENSGALG00000006802	1321.77	6603.6	-2.3208	1.823e-10	3.6244e-09
Novel02015	194.96	22.8267	3.0944	1.8395e-10	3.6542e-09
ENSGALG00000042351	67.8387	952.876	-3.8121	1.8677e-10	3.7073e-09
ENSGALG00000016464	187.479	22.8551	3.0361	1.8765e-10	3.7216e-09
ENSGALG00000009519	211.233	25.9132	3.0271	1.9252e-10	3.8151e-09
ENSGALG00000020322	258.086	35.8808	2.8466	1.9327e-10	3.8267e-09
ENSGALG00000015089	90.0578	2.72309	5.0475	1.9534e-10	3.8646e-09
ENSGALG00000002679	121.668	6.54662	4.2161	1.973e-10	3.9002e-09
ENSGALG00000041299	421.846	68.8313	2.6156	1.9858e-10	3.9223e-09
ENSGALG00000027887	987.789	190.413	2.3751	1.9968e-10	3.9407e-09
ENSGALG00000028721	113.394	661.679	-2.5448	2.0029e-10	3.9495e-09
ENSGALG00000041417	841.418	4266.93	-2.3423	2.0086e-10	3.9576e-09
ENSGALG00000007549	1717.31	8322.04	-2.2768	2.0358e-10	4.0079e-09
ENSGALG00000003930	317.685	31.5519	3.3318	2.0517e-10	4.0358e-09
ENSGALG00000041403	428.5	2145.22	-2.3238	2.1095e-10	4.1462e-09
ENSGALG00000015363	400.236	66.0285	2.5997	2.1276e-10	4.1784e-09
ENSGALG00000004721	11.4987	180.984	-3.9763	2.1342e-10	4.1879e-09
ENSGALG00000008613	851.502	4206.62	-2.3046	2.1362e-10	4.1885e-09
ENSGALG00000039865	498.531	2502.44	-2.3276	2.1558e-10	4.2234e-09
ENSGALG00000007645	75.5684	446.766	-2.5637	2.208e-10	4.3222e-09
ENSGALG00000016164	31.4243	355.119	-3.4984	2.2314e-10	4.3645e-09
ENSGALG00000014477	154.576	15.8633	3.2845	2.2496e-10	4.3965e-09
ENSGALG00000036004	699.398	3472.13	-2.3116	2.2517e-10	4.397e-09
ENSGALG00000002473	229.269	1537.35	-2.7453	2.3109e-10	4.5055e-09
Novel00772	1.0116	55.6077	-5.7806	2.3095e-10	4.5055e-09
ENSGALG00000039977	5022.94	131080	-4.7058	2.3228e-10	4.525e-09
Novel02922	172.859	10.703	4.0135	2.4367e-10	4.743e-09
ENSGALG00000038885	1513.94	300.218	2.3342	2.4902e-10	4.8432e-09
ENSGALG00000014943	79.0997	3.59826	4.4583	2.4931e-10	4.845e-09
ENSGALG00000031129	1819.68	303.395	2.5844	2.515e-10	4.8836e-09
ENSGALG00000011238	6338.33	1299.89	2.2857	2.5342e-10	4.9169e-09
ENSGALG00000043768	21990.8	125496	-2.5127	2.54e-10	4.9243e-09
ENSGALG00000010356	448.946	75.3425	2.575	2.5429e-10	4.9258e-09
ENSGALG00000032239	330.561	12.5024	4.7246	2.6212e-10	5.0736e-09
ENSGALG00000003227	131.532	8.49003	3.9535	2.6249e-10	5.0766e-09
ENSGALG00000037996	894.849	4387.18	-2.2936	2.6291e-10	5.0806e-09
ENSGALG00000031606	603.143	108.781	2.4711	2.6942e-10	5.2023e-09
ENSGALG00000034701	16.2688	147.029	-3.1759	2.7668e-10	5.3383e-09
ENSGALG00000039164	243.576	33.4447	2.8645	2.8465e-10	5.4875e-09
ENSGALG00000038745	316.987	1708.19	-2.43	2.865e-10	5.5189e-09
ENSGALG00000013616	60.6975	1.24233	5.6105	2.8714e-10	5.5267e-09
ENSGALG00000008383	190.55	23.2518	3.0348	2.9752e-10	5.7221e-09
ENSGALG00000032664	529.881	3262.21	-2.6221	3.0071e-10	5.7789e-09
ENSGALG00000006216	906.528	5377.3	-2.5685	3.0266e-10	5.8117e-09
ENSGALG00000029145	269.049	1379.92	-2.3586	3.0593e-10	5.8697e-09
ENSGALG00000006137	313.527	47.6853	2.717	3.0962e-10	5.9359e-09
ENSGALG00000007676	411.778	68.3175	2.5915	3.175e-10	6.0821e-09
ENSGALG00000042568	262.353	37.1253	2.821	3.2064e-10	6.1373e-09
Novel01049	171.597	19.4447	3.1416	3.3525e-10	6.4119e-09
ENSGALG00000009037	134.873	4.42807	4.9288	3.3909e-10	6.4802e-09
ENSGALG00000011113	60.0832	1.29033	5.5411	3.4497e-10	6.5874e-09
ENSGALG00000000791	533.365	94.1278	2.5024	3.5519e-10	6.7772e-09
ENSGALG00000008912	50.4873	518.827	-3.3613	3.5848e-10	6.8347e-09
ENSGALG00000031869	2.92553	65.8317	-4.492	3.6694e-10	6.9901e-09
Novel00832	67.9642	2.30792	4.8801	3.6721e-10	6.9901e-09
ENSGALG00000007404	3329.81	684.692	2.2819	3.6843e-10	7.0077e-09
ENSGALG00000017179	5203.13	1112.18	2.226	3.7675e-10	7.1604e-09
ENSGALG00000004467	1195.3	5737.62	-2.2631	3.8161e-10	7.2471e-09
ENSGALG00000015132	1666.06	335.663	2.3114	3.8352e-10	7.2775e-09
ENSGALG00000001640	1146.15	229.933	2.3175	3.8503e-10	7.3004e-09
ENSGALG00000031751	467.858	2260.73	-2.2726	3.8877e-10	7.3655e-09
ENSGALG00000031284	587.854	2813.78	-2.259	3.9204e-10	7.4217e-09
ENSGALG00000040896	3328.05	694.786	2.26	3.9665e-10	7.5032e-09
ENSGALG00000000293	176.245	21.3596	3.0446	4.0746e-10	7.7016e-09
ENSGALG00000037498	340.35	12270.6	-5.172	4.1349e-10	7.8094e-09
ENSGALG00000004221	169.115	18.9868	3.1549	4.1715e-10	7.8724e-09
ENSGALG00000015720	1208.59	142.611	3.0832	4.2264e-10	7.9699e-09
ENSGALG00000007378	899.984	4250.63	-2.2397	4.2437e-10	7.9961e-09
ENSGALG00000014236	82.1322	472.505	-2.5243	4.4865e-10	8.4471e-09
ENSGALG00000036310	400.25	2009.31	-2.3277	4.5528e-10	8.5652e-09
ENSGALG00000010997	732.903	136.292	2.4269	4.6298e-10	8.7034e-09
Novel00365	59.3765	1.38581	5.4211	4.7738e-10	8.967e-09
ENSGALG00000023338	391.664	65.8386	2.5726	4.8152e-10	9.0307e-09
ENSGALG00000037852	516.409	93.3687	2.4675	4.813e-10	9.0307e-09
ENSGALG00000005610	258.947	38.816	2.7379	4.859e-10	9.1059e-09
Novel02205	845.325	165.533	2.3524	4.9108e-10	9.1958e-09
ENSGALG00000000438	274.189	41.1377	2.7366	4.924e-10	9.2133e-09
ENSGALG00000033568	606.598	2927.31	-2.2708	5.0245e-10	9.3941e-09
ENSGALG00000007537	1905.35	394.03	2.2737	5.1009e-10	9.5296e-09
ENSGALG00000038343	65.6175	390.273	-2.5723	5.145e-10	9.6046e-09
ENSGALG00000036786	18.0169	156.23	-3.1162	5.2962e-10	9.8791e-09
ENSGALG00000003123	1651.66	319.145	2.3716	5.3447e-10	9.9619e-09
ENSGALG00000038740	90.3577	5.81547	3.9577	5.3984e-10	1.0054e-08
ENSGALG00000034643	0.48228	41.9458	-6.4425	5.4733e-10	1.0186e-08
ENSGALG00000040430	204.962	27.2141	2.9129	5.5319e-10	1.0287e-08
Novel02031	365.311	61.2248	2.5769	5.5779e-10	1.0365e-08
ENSGALG00000016459	137.286	13.9315	3.3008	5.5849e-10	1.037e-08
ENSGALG00000029663	1672.4	7881.87	-2.2366	5.6173e-10	1.0422e-08
ENSGALG00000008950	138.575	712.361	-2.3619	5.6321e-10	1.0441e-08
ENSGALG00000032072	206.082	1022.77	-2.3112	5.6813e-10	1.0524e-08
Novel01240	1147.55	7188.14	-2.6471	5.7267e-10	1.06e-08
ENSGALG00000043349	15.2101	138.166	-3.1833	5.8714e-10	1.086e-08
Novel02883	102.495	1417.99	-3.7902	5.8975e-10	1.09e-08
ENSGALG00000016564	72.774	3.2348	4.4917	5.9088e-10	1.0912e-08
ENSGALG00000042365	81.8639	4.42807	4.2085	5.921e-10	1.0927e-08
ENSGALG00000031164	76.3709	0.923699	6.3695	5.9541e-10	1.0979e-08
ENSGALG00000034322	29.5906	501.137	-4.082	5.9726e-10	1.1005e-08
ENSGALG00000006098	591.281	2832.81	-2.2603	6.0155e-10	1.1076e-08
ENSGALG00000031617	284.483	43.8829	2.6966	6.0345e-10	1.1102e-08
ENSGALG00000008139	821.993	5742.05	-2.8044	6.2684e-10	1.1524e-08
ENSGALG00000014233	2744.24	588.897	2.2203	6.4306e-10	1.1813e-08
ENSGALG00000038502	433.113	76.4967	2.5013	6.4732e-10	1.1882e-08
ENSGALG00000011671	75.8775	3.45689	4.4561	6.6834e-10	1.2259e-08
ENSGALG00000014891	120.504	695.147	-2.5282	6.7461e-10	1.2364e-08
ENSGALG00000001729	1361.24	279.576	2.2836	6.761e-10	1.2382e-08
ENSGALG00000032157	5.18873	82.8629	-3.9973	6.7914e-10	1.2428e-08
ENSGALG00000039220	2.63714	64.094	-4.6031	6.8146e-10	1.2461e-08
ENSGALG00000026677	340.295	25.3387	3.7474	6.8249e-10	1.2471e-08
ENSGALG00000041101	111.43	9.46067	3.5581	6.8413e-10	1.2491e-08
ENSGALG00000042184	798.695	3752.34	-2.2321	6.8719e-10	1.2538e-08
ENSGALG00000003770	8895.95	1946.3	2.1924	7.0195e-10	1.2797e-08
ENSGALG00000017493	409.184	71.0468	2.5259	7.1008e-10	1.2936e-08
ENSGALG00000039878	667.296	3205.39	-2.2641	7.1517e-10	1.3019e-08
ENSGALG00000037780	506.186	91.4737	2.4682	7.1788e-10	1.3058e-08
ENSGALG00000040023	504.405	90.6814	2.4757	7.2002e-10	1.3087e-08
ENSGALG00000038146	44.2618	285.792	-2.6908	7.2668e-10	1.3198e-08
ENSGALG00000010931	15.8402	141.687	-3.161	7.2825e-10	1.3217e-08
ENSGALG00000037696	25.1546	186.628	-2.8913	7.304e-10	1.3246e-08
ENSGALG00000015663	616.269	5001.45	-3.0207	7.311e-10	1.3249e-08
ENSGALG00000011695	1344.43	6495.02	-2.2723	7.3704e-10	1.3346e-08
ENSGALG00000025788	207.516	1242.6	-2.5821	7.4528e-10	1.3485e-08
Novel01414	9.19569	218.114	-4.568	7.5668e-10	1.3681e-08
ENSGALG00000043642	368.732	63.3576	2.541	7.5813e-10	1.3697e-08
Novel02381	725.957	141.925	2.3548	7.606e-10	1.3732e-08
ENSGALG00000015124	398.139	69.152	2.5254	7.6499e-10	1.3801e-08
ENSGALG00000037619	60.4922	352.441	-2.5426	7.7975e-10	1.4056e-08
ENSGALG00000011285	527.005	2521.79	-2.2586	7.8149e-10	1.4077e-08
ENSGALG00000025862	962.91	188.248	2.3548	7.8879e-10	1.4198e-08
ENSGALG00000039171	223.32	31.2196	2.8386	7.902e-10	1.4213e-08
ENSGALG00000042153	77.4054	4.15585	4.2192	7.9394e-10	1.427e-08
ENSGALG00000039583	382.973	1845.42	-2.2686	7.9701e-10	1.4314e-08
ENSGALG00000026301	190.866	25.2986	2.9154	8.1521e-10	1.463e-08
ENSGALG00000000394	42.7018	0	Inf	8.2925e-10	1.4866e-08
ENSGALG00000034303	160.91	795.426	-2.3055	8.2959e-10	1.4866e-08
ENSGALG00000014031	200.458	1001.02	-2.3201	8.3197e-10	1.4898e-08
ENSGALG00000037321	36.9831	335.766	-3.1825	8.3466e-10	1.4935e-08
ENSGALG00000038342	0.210023	71.6809	-8.4149	8.3897e-10	1.5001e-08
ENSGALG00000012275	189.949	1194.23	-2.6524	8.6445e-10	1.5445e-08
ENSGALG00000011897	765.963	3571.96	-2.2214	8.704e-10	1.554e-08
ENSGALG00000009538	338.181	56.6965	2.5765	8.7704e-10	1.5647e-08
ENSGALG00000006608	224.942	32.1132	2.8083	8.8559e-10	1.5788e-08
ENSGALG00000040759	1759.61	278.808	2.6579	9.0447e-10	1.6112e-08
ENSGALG00000026600	1310.23	167.674	2.9661	9.1262e-10	1.6246e-08
ENSGALG00000033420	2595.63	80.4848	5.0112	9.204e-10	1.6372e-08
ENSGALG00000028026	674.599	5715.52	-3.0828	9.2186e-10	1.6386e-08
ENSGALG00000040351	123.896	12.0413	3.3631	9.4044e-10	1.6704e-08
Novel01996	127.822	5.20934	4.6169	9.6393e-10	1.7109e-08
Novel02469	411.553	1981.93	-2.2678	9.7892e-10	1.7362e-08
ENSGALG00000010857	171.789	21.0241	3.0305	9.8877e-10	1.7524e-08
ENSGALG00000009608	411.561	1948.7	-2.2433	1.0003e-09	1.7715e-08
ENSGALG00000007078	1131.79	184.062	2.6203	1.0259e-09	1.8156e-08
ENSGALG00000003720	354.038	60.8635	2.5403	1.0453e-09	1.8485e-08
ENSGALG00000012160	317.806	53.457	2.5717	1.0517e-09	1.8584e-08
ENSGALG00000029811	474.12	88.8709	2.4155	1.0734e-09	1.8955e-08
ENSGALG00000001491	265.663	41.7612	2.6694	1.0812e-09	1.9077e-08
ENSGALG00000003529	265.73	1395.72	-2.393	1.1375e-09	2.0045e-08
ENSGALG00000015967	70.5422	3.18362	4.4697	1.1377e-09	2.0045e-08
ENSGALG00000032750	105.36	8.85561	3.5726	1.1563e-09	2.0359e-08
ENSGALG00000007582	4595.53	984.725	2.2224	1.1664e-09	2.0521e-08
ENSGALG00000005102	192.826	979.383	-2.3446	1.1706e-09	2.0565e-08
ENSGALG00000028770	106.208	8.94897	3.569	1.1705e-09	2.0565e-08
ENSGALG00000008785	711.103	3336.48	-2.2302	1.1754e-09	2.0635e-08
ENSGALG00000012756	124.607	12.5504	3.3116	1.1896e-09	2.0868e-08
ENSGALG00000041352	60.616	6457.41	-6.7351	1.1908e-09	2.0875e-08
ENSGALG00000005842	82.2078	0	Inf	1.1951e-09	2.0921e-08
ENSGALG00000012658	434.079	4401.32	-3.3419	1.1952e-09	2.0921e-08
ENSGALG00000005071	831.925	3756.27	-2.1748	1.2093e-09	2.1149e-08
Novel02984	6.10052	83.9786	-3.783	1.21e-09	2.1149e-08
ENSGALG00000004741	1015.29	209.428	2.2774	1.2152e-09	2.1226e-08
ENSGALG00000009286	3411.6	15362	-2.1708	1.2342e-09	2.154e-08
ENSGALG00000026154	167.601	835.414	-2.3175	1.235e-09	2.154e-08
ENSGALG00000008916	262.786	1264.66	-2.2668	1.2457e-09	2.1711e-08
ENSGALG00000026081	1260.86	20891.2	-4.0504	1.2714e-09	2.2143e-08
ENSGALG00000038829	494.328	2257.07	-2.1909	1.2976e-09	2.2583e-08
ENSGALG00000008716	658.547	64.5134	3.3516	1.309e-09	2.2765e-08
ENSGALG00000028600	24918.3	5690.62	2.1306	1.3114e-09	2.279e-08
ENSGALG00000037665	101.773	8.24948	3.6249	1.3131e-09	2.2803e-08
ENSGALG00000012987	189.961	26.0298	2.8675	1.3471e-09	2.3378e-08
ENSGALG00000014213	556.718	107.536	2.3721	1.3491e-09	2.3395e-08
ENSGALG00000004515	697.147	138.022	2.3366	1.3549e-09	2.3478e-08
ENSGALG00000007128	3833.23	854.823	2.1649	1.3783e-09	2.3868e-08
ENSGALG00000011481	298.434	2114.24	-2.8247	1.3988e-09	2.4205e-08
ENSGALG00000032222	499.919	93.5828	2.4174	1.4194e-09	2.4525e-08
ENSGALG00000037837	3043.52	14171.1	-2.2191	1.4192e-09	2.4525e-08
ENSGALG00000030313	735.054	71.9315	3.3532	1.4328e-09	2.4739e-08
ENSGALG00000038194	880.551	184.437	2.2553	1.4545e-09	2.5097e-08
Novel02793	246.978	20.8031	3.5695	1.4682e-09	2.5314e-08
ENSGALG00000038978	1091.39	230.043	2.2462	1.5071e-09	2.5966e-08
Novel03032	1052.52	219.874	2.2591	1.5086e-09	2.5974e-08
ENSGALG00000037387	137.747	15.6021	3.1422	1.5222e-09	2.6189e-08
ENSGALG00000037953	48569.9	11125.5	2.1262	1.5328e-09	2.6354e-08
ENSGALG00000007114	571.455	43702.6	-6.2569	1.5422e-09	2.6496e-08
ENSGALG00000010342	7.91464	123.328	-3.9618	1.5609e-09	2.6798e-08
ENSGALG00000039081	75.7524	434.761	-2.5209	1.578e-09	2.7072e-08
ENSGALG00000006886	41.8601	257.864	-2.623	1.6347e-09	2.8025e-08
ENSGALG00000036990	861.15	10336.8	-3.5854	1.6454e-09	2.8189e-08
ENSGALG00000007131	2792.72	617.72	2.1766	1.6466e-09	2.819e-08
Novel01105	302.969	47.5471	2.6717	1.6877e-09	2.8872e-08
ENSGALG00000004334	141.709	706.235	-2.3172	1.6986e-09	2.9039e-08
ENSGALG00000003582	78.2662	4.47395	4.1288	1.7117e-09	2.9241e-08
Novel01211	302.352	4.89124	5.9499	1.7332e-09	2.9588e-08
ENSGALG00000037203	18362.8	4183.78	2.1339	1.7669e-09	3.0142e-08
ENSGALG00000042419	51.4846	0.876224	5.8767	1.7821e-09	3.038e-08
ENSGALG00000000336	1111.9	5158.94	-2.2141	1.7885e-09	3.0467e-08
ENSGALG00000012481	366.215	65.8406	2.4756	1.8146e-09	3.0891e-08
ENSGALG00000027853	779.14	107.339	2.8597	1.8411e-09	3.1319e-08
ENSGALG00000019741	410.48	74.3962	2.464	1.8638e-09	3.1683e-08
ENSGALG00000009082	1141.47	55317.2	-5.5988	1.895e-09	3.2191e-08
ENSGALG00000035191	46.1893	0.414111	6.8014	1.9045e-09	3.2308e-08
Novel00969	0	32.1248	#NAME?	1.9039e-09	3.2308e-08
ENSGALG00000034502	540.251	103.018	2.3907	2.0332e-09	3.4466e-08
ENSGALG00000029606	29.3122	301.19	-3.3611	2.0546e-09	3.4804e-08
ENSGALG00000029921	3209.41	725.498	2.1453	2.0699e-09	3.5039e-08
ENSGALG00000042657	41.0892	0	Inf	2.0849e-09	3.5268e-08
ENSGALG00000039322	2209.11	357.674	2.6267	2.0969e-09	3.5446e-08
ENSGALG00000029585	1000.95	4471.19	-2.1593	2.1012e-09	3.5495e-08
ENSGALG00000005332	158.454	19.1756	3.0467	2.1072e-09	3.5545e-08
ENSGALG00000029746	51.0965	506.048	-3.308	2.1064e-09	3.5545e-08
ENSGALG00000011493	445.559	85.1609	2.3874	2.1207e-09	3.5748e-08
ENSGALG00000005706	302.477	1828.08	-2.5954	2.1528e-09	3.6265e-08
ENSGALG00000043582	350.316	0	Inf	2.1609e-09	3.6375e-08
ENSGALG00000032453	2.58344	142.769	-5.7882	2.1699e-09	3.6501e-08
ENSGALG00000001662	62.2782	2.1655	4.846	2.1866e-09	3.6757e-08
ENSGALG00000002690	420.906	1874.97	-2.1553	2.1885e-09	3.6764e-08
ENSGALG00000009415	125.238	12.725	3.2989	2.1993e-09	3.6919e-08
ENSGALG00000002223	92.7202	1.33781	6.1149	2.2203e-09	3.7246e-08
ENSGALG00000038540	18.9547	1700.65	-6.4874	2.2295e-09	3.7373e-08
ENSGALG00000038721	586.776	5894.53	-3.3285	2.2393e-09	3.7512e-08
ENSGALG00000034107	456.452	8753.83	-4.2614	2.2657e-09	3.7927e-08
ENSGALG00000009698	668.663	134.039	2.3186	2.2767e-09	3.8086e-08
ENSGALG00000003733	539.367	2463.92	-2.1916	2.3137e-09	3.8677e-08
ENSGALG00000009433	1185.22	7757.64	-2.7105	2.326e-09	3.8856e-08
ENSGALG00000042679	32.1266	1564.84	-5.6061	2.3589e-09	3.938e-08
ENSGALG00000041419	2047.27	32921.4	-4.0073	2.3768e-09	3.9651e-08
ENSGALG00000032874	104.213	9.36519	3.4761	2.4537e-09	4.0905e-08
ENSGALG00000039801	78.7807	506.774	-2.6854	2.4733e-09	4.1204e-08
ENSGALG00000042117	196.137	965.057	-2.2988	2.4754e-09	4.121e-08
ENSGALG00000040244	5948.44	1378.81	2.1091	2.5353e-09	4.2179e-08
ENSGALG00000007185	580.315	2609.03	-2.1686	2.5909e-09	4.3015e-08
ENSGALG00000011889	203.246	28.6648	2.8259	2.5882e-09	4.3015e-08
ENSGALG00000033271	549.783	59718.4	-6.7632	2.5907e-09	4.3015e-08
ENSGALG00000011176	339.2	59.4324	2.5128	2.5993e-09	4.3124e-08
Novel01926	36.4467	810.253	-4.4745	2.6204e-09	4.3445e-08
ENSGALG00000036572	516.23	102.417	2.3336	2.6335e-09	4.3631e-08
ENSGALG00000014982	675.39	135.306	2.3195	2.6563e-09	4.3979e-08
ENSGALG00000001076	359.648	65.0103	2.4678	2.6737e-09	4.4237e-08
ENSGALG00000012101	282.526	47.0544	2.586	2.7318e-09	4.5167e-08
ENSGALG00000008823	18.6475	578.079	-4.9542	2.741e-09	4.5288e-08
ENSGALG00000032702	2599.81	589.865	2.1399	2.7827e-09	4.5945e-08
ENSGALG00000014749	472.553	67.4459	2.8087	2.8051e-09	4.6284e-08
ENSGALG00000029799	431.322	0	Inf	2.8109e-09	4.6348e-08
ENSGALG00000037021	5.96793	84.6033	-3.8254	2.8176e-09	4.6427e-08
Novel02552	78.4515	0	Inf	2.8382e-09	4.6735e-08
ENSGALG00000008554	178.069	8.16928	4.4461	2.871e-09	4.7236e-08
ENSGALG00000016872	443.541	2017.11	-2.1851	2.8726e-09	4.7236e-08
Novel00047	3.53187	66.1472	-4.2272	2.8805e-09	4.7334e-08
ENSGALG00000026598	13.291	118.539	-3.1568	2.9067e-09	4.77e-08
ENSGALG00000037339	1007.03	213.066	2.2407	2.9061e-09	4.77e-08
ENSGALG00000016896	76.5932	402.206	-2.3926	2.9145e-09	4.7795e-08
ENSGALG00000040156	646.901	4841.78	-2.9039	2.935e-09	4.81e-08
ENSGALG00000008850	294.332	2147.68	-2.8673	2.94e-09	4.8149e-08
ENSGALG00000017033	1118.05	5886.23	-2.3964	2.9784e-09	4.8743e-08
ENSGALG00000039742	283.456	47.8304	2.5671	2.9803e-09	4.8743e-08
ENSGALG00000014994	763.766	0	Inf	3.0417e-09	4.9713e-08
ENSGALG00000014981	584.215	2609.8	-2.1594	3.0589e-09	4.996e-08
ENSGALG00000042789	423.193	80.1889	2.3998	3.0768e-09	5.0219e-08
ENSGALG00000011278	299.161	1794.19	-2.5843	3.104e-09	5.0627e-08
ENSGALG00000003767	414.985	78.6669	2.3992	3.1289e-09	5.0999e-08
ENSGALG00000040539	943.855	138.098	2.7729	3.1598e-09	5.1468e-08
ENSGALG00000026285	137.146	1103.76	-3.0086	3.2096e-09	5.2245e-08
ENSGALG00000011079	1351.34	5826.6	-2.1083	3.2571e-09	5.2947e-08
ENSGALG00000030369	437.477	76.2699	2.52	3.2567e-09	5.2947e-08
ENSGALG00000034476	408.576	71.4103	2.5164	3.3076e-09	5.3732e-08
ENSGALG00000009016	299.493	51.7979	2.5316	3.3126e-09	5.3777e-08
ENSGALG00000002911	766.031	150.698	2.3457	3.3248e-09	5.3939e-08
ENSGALG00000040062	584.42	13335.8	-4.5122	3.3882e-09	5.493e-08
ENSGALG00000032681	326.893	59.169	2.4659	3.4021e-09	5.5117e-08
ENSGALG00000040256	44.6043	0.414111	6.751	3.5053e-09	5.6753e-08
ENSGALG00000011683	371.174	68.5986	2.4358	3.5529e-09	5.7485e-08
ENSGALG00000012421	174.379	24.3232	2.8418	3.5715e-09	5.7747e-08
ENSGALG00000014934	33.799	211.54	-2.6459	3.5804e-09	5.7851e-08
ENSGALG00000032988	289.046	1297.65	-2.1665	3.6093e-09	5.8279e-08
ENSGALG00000016546	635.223	132.497	2.2613	3.6382e-09	5.8707e-08
ENSGALG00000009634	522.653	2325.37	-2.1535	3.6971e-09	5.9618e-08
ENSGALG00000017334	1810.03	404.429	2.1621	3.704e-09	5.9688e-08
ENSGALG00000026661	475.073	3303.9	-2.7979	3.73e-09	6.0068e-08
ENSGALG00000005537	26.5608	624.042	-4.5543	3.7369e-09	6.014e-08
ENSGALG00000029301	290.368	28.6136	3.3431	3.7723e-09	6.0668e-08
ENSGALG00000034458	572.311	3968.14	-2.7936	3.775e-09	6.0671e-08
ENSGALG00000023936	315.389	25.7027	3.6171	3.7787e-09	6.0676e-08
ENSGALG00000031572	416.77	76.2124	2.4512	3.7803e-09	6.0676e-08
ENSGALG00000037880	5074.18	71800.5	-3.8227	3.7896e-09	6.0784e-08
ENSGALG00000037299	146.372	974.332	-2.7348	3.82e-09	6.1232e-08
ENSGALG00000006051	235.226	37.1722	2.6618	3.8259e-09	6.1285e-08
ENSGALG00000000913	977.961	137.4	2.8314	3.8515e-09	6.1654e-08
ENSGALG00000013776	215.298	32.8882	2.7107	3.8751e-09	6.1992e-08
ENSGALG00000027096	815.482	3543.8	-2.1196	3.9006e-09	6.2358e-08
ENSGALG00000029072	245.822	39.994	2.6198	4.0329e-09	6.443e-08
ENSGALG00000028210	55.2313	1541.38	-4.8026	4.0543e-09	6.4686e-08
ENSGALG00000033946	189.293	27.2516	2.7962	4.0532e-09	6.4686e-08
ENSGALG00000008747	505.688	99.5935	2.3441	4.0961e-09	6.5311e-08
ENSGALG00000015388	95.1438	7.97938	3.5758	4.1323e-09	6.5845e-08
Novel01716	77.534	4.84165	4.0013	4.163e-09	6.629e-08
ENSGALG00000033966	881.225	192.167	2.1971	4.179e-09	6.65e-08
ENSGALG00000005571	1240.3	5360.3	-2.1116	4.2196e-09	6.7103e-08
ENSGALG00000030691	1684.18	7385.2	-2.1326	4.2633e-09	6.7752e-08
ENSGALG00000019967	243.064	40.0399	2.6018	4.2915e-09	6.8156e-08
Novel02937	39.2871	0	Inf	4.3113e-09	6.8425e-08
ENSGALG00000006389	76.0001	557.828	-2.8757	4.4152e-09	7.0028e-08
ENSGALG00000033684	1175.33	258.871	2.1828	4.551e-09	7.2136e-08
ENSGALG00000025809	487.335	2141.32	-2.1355	4.5659e-09	7.2325e-08
ENSGALG00000040869	18.7488	149.834	-2.9985	4.5865e-09	7.2602e-08
ENSGALG00000034876	580.742	2526.38	-2.1211	4.6332e-09	7.3284e-08
ENSGALG00000040768	176.406	7.19863	4.615	4.6356e-09	7.3284e-08
ENSGALG00000029000	262.283	1206.83	-2.202	4.6537e-09	7.3522e-08
ENSGALG00000029404	32.6408	291.895	-3.1607	4.8099e-09	7.5939e-08
ENSGALG00000031440	1057.89	237.418	2.1557	5.0142e-09	7.9114e-08
ENSGALG00000004869	1359.39	5864.14	-2.109	5.1484e-09	8.1178e-08
ENSGALG00000006563	958.271	213.224	2.1681	5.2241e-09	8.2318e-08
ENSGALG00000026864	372.981	1692.01	-2.1816	5.2324e-09	8.2395e-08
ENSGALG00000041981	992.764	216.232	2.1989	5.2871e-09	8.3203e-08
ENSGALG00000001115	16.1135	130.966	-3.0228	5.3253e-09	8.3748e-08
ENSGALG00000026499	5.49324	73.0599	-3.7334	5.3621e-09	8.4273e-08
ENSGALG00000014708	821.982	3552.52	-2.1117	5.4101e-09	8.4917e-08
ENSGALG00000031600	1123.09	250.031	2.1673	5.4082e-09	8.4917e-08
ENSGALG00000011005	125.98	14.44	3.125	5.5042e-09	8.6337e-08
ENSGALG00000000102	540.291	111.01	2.2831	5.5644e-09	8.7224e-08
ENSGALG00000017119	762.68	160.056	2.2525	5.5906e-09	8.7579e-08
ENSGALG00000012470	104.381	5.0326	4.3744	5.6277e-09	8.8058e-08
ENSGALG00000027232	1842.13	423.575	2.1207	5.635e-09	8.8058e-08
ENSGALG00000039287	39.09	442.655	-3.5013	5.6329e-09	8.8058e-08
ENSGALG00000043555	988.888	217.437	2.1852	5.6358e-09	8.8058e-08
ENSGALG00000005769	858.099	185.541	2.2094	5.7043e-09	8.9057e-08
ENSGALG00000012541	36.1313	1509.11	-5.3843	5.707e-09	8.9057e-08
ENSGALG00000001141	48.2754	0.828221	5.8651	5.7389e-09	8.9496e-08
ENSGALG00000024449	406.612	1753.52	-2.1085	5.7778e-09	9.0044e-08
ENSGALG00000032028	181.833	26.8981	2.757	5.8687e-09	9.1401e-08
ENSGALG00000003833	75.7676	4.84218	3.9679	5.8789e-09	9.1502e-08
ENSGALG00000034048	456.554	76.6529	2.5744	6.0071e-09	9.3437e-08
ENSGALG00000041596	574.514	2527.29	-2.1372	6.0587e-09	9.4179e-08
ENSGALG00000032699	1159.21	257.944	2.168	6.0938e-09	9.4663e-08
ENSGALG00000037669	11304.7	2042.47	2.4685	6.1411e-09	9.5337e-08
ENSGALG00000039390	70.3754	4.0609	4.1152	6.3247e-09	9.8124e-08
Novel01533	38.1976	0	Inf	6.3989e-09	9.9212e-08
Novel00519	5.05667	168.158	-5.0555	6.4112e-09	9.9339e-08
ENSGALG00000005226	214.957	23643.3	-6.7812	6.4239e-09	9.9471e-08
ENSGALG00000033696	188.521	3439.45	-4.1894	6.4338e-09	9.956e-08
ENSGALG00000010580	227.19	1088.31	-2.2601	6.4979e-09	1.0049e-07
ENSGALG00000027874	207.934	932.681	-2.1653	6.6953e-09	1.0347e-07
ENSGALG00000037238	1407.01	6018.57	-2.0968	6.705e-09	1.0356e-07
ENSGALG00000023517	240.052	2122.05	-3.144	6.7382e-09	1.04e-07
ENSGALG00000036160	12.883	117.371	-3.1875	6.8058e-09	1.0498e-07
ENSGALG00000012004	228.945	37.5035	2.6099	6.8657e-09	1.0577e-07
ENSGALG00000037951	60.9593	0.462114	7.0435	6.8642e-09	1.0577e-07
ENSGALG00000004267	37.9724	0	Inf	7.0699e-09	1.0885e-07
ENSGALG00000040363	228.681	1035.43	-2.1788	7.091e-09	1.091e-07
ENSGALG00000038110	394.649	78.2017	2.3353	7.4495e-09	1.1455e-07
ENSGALG00000010182	501.367	2190.83	-2.1275	7.4779e-09	1.1491e-07
ENSGALG00000024398	2163.08	8834.25	-2.03	7.4868e-09	1.1497e-07
ENSGALG00000011659	509.456	104.416	2.2866	7.5049e-09	1.1518e-07
ENSGALG00000021692	1521.76	8122.6	-2.4162	7.5696e-09	1.161e-07
ENSGALG00000030086	1693.19	7123.35	-2.0728	7.6797e-09	1.1771e-07
ENSGALG00000035144	98.6184	499.911	-2.3417	7.868e-09	1.2052e-07
ENSGALG00000016563	291.404	52.4489	2.474	7.9972e-09	1.2242e-07
ENSGALG00000005519	116.06	7.65863	3.9216	8.0685e-09	1.2343e-07
ENSGALG00000004266	350.647	66.8504	2.391	8.1404e-09	1.2446e-07
ENSGALG00000002445	522.643	2268.2	-2.1177	8.1619e-09	1.2471e-07
ENSGALG00000007786	72.645	2042.82	-4.8136	8.1856e-09	1.2499e-07
ENSGALG00000015203	97.6669	2.67668	5.1894	8.2446e-09	1.2578e-07
ENSGALG00000042564	448.609	1958	-2.1259	8.2481e-09	1.2578e-07
ENSGALG00000016986	424.37	85.758	2.307	8.3005e-09	1.265e-07
ENSGALG00000007210	218.546	2169.02	-3.311	8.3373e-09	1.2698e-07
ENSGALG00000034198	319.334	59.9345	2.4136	8.3648e-09	1.2732e-07
ENSGALG00000030164	959.039	7857.57	-3.0344	8.4134e-09	1.2798e-07
ENSGALG00000004498	357.262	61.0433	2.5491	8.4275e-09	1.2811e-07
ENSGALG00000039200	1090.39	244.644	2.1561	8.5434e-09	1.2971e-07
Novel00735	315.165	0	Inf	8.5401e-09	1.2971e-07
ENSGALG00000032860	65.7082	2.67615	4.6178	8.6106e-09	1.3065e-07
Novel02648	779.02	175.244	2.1523	8.6602e-09	1.3132e-07
Novel01672	7.32068	94.5825	-3.6915	8.8025e-09	1.334e-07
ENSGALG00000016615	88.5725	0.924228	6.5825	8.8095e-09	1.3342e-07
ENSGALG00000031240	41.0197	239.629	-2.5464	8.8227e-09	1.3354e-07
ENSGALG00000005972	3.32278	1014.22	-8.2538	9.0283e-09	1.3656e-07
ENSGALG00000010692	93.9335	8.20307	3.5174	9.1052e-09	1.3764e-07
ENSGALG00000043329	12568.6	3060.35	2.0381	9.2065e-09	1.3908e-07
Novel01535	59.9778	0	Inf	9.2505e-09	1.3966e-07
Novel00898	47.5966	258.04	-2.4387	9.2632e-09	1.3976e-07
ENSGALG00000029545	120.528	13.3175	3.178	9.3805e-09	1.4144e-07
ENSGALG00000010837	413.573	2106.37	-2.3485	9.4528e-09	1.4245e-07
ENSGALG00000000086	1290.56	5341.21	-2.0492	9.5783e-09	1.4425e-07
ENSGALG00000001028	79.6017	5.81229	3.7756	9.6015e-09	1.4451e-07
ENSGALG00000029529	13.1557	117.173	-3.1549	9.6578e-09	1.4526e-07
ENSGALG00000034214	70.8674	2.57961	4.7799	9.7123e-09	1.4599e-07
ENSGALG00000003475	2672.55	639.125	2.064	9.7576e-09	1.4658e-07
ENSGALG00000005180	4710.48	263.803	4.1583	9.8464e-09	1.4773e-07
ENSGALG00000030024	946.191	3969.06	-2.0686	9.8446e-09	1.4773e-07
ENSGALG00000040426	486.028	3387.03	-2.8009	9.8815e-09	1.4817e-07
ENSGALG00000037192	2.23322	78.3321	-5.1324	1.0063e-08	1.508e-07
ENSGALG00000007821	848.953	3609.6	-2.0881	1.0077e-08	1.509e-07
ENSGALG00000012969	93.4526	8.58603	3.4442	1.0212e-08	1.5284e-07
ENSGALG00000032373	1038.73	4296.51	-2.0483	1.0276e-08	1.5371e-07
ENSGALG00000007419	789.749	7.98044	6.6288	1.0321e-08	1.5428e-07
ENSGALG00000001956	3964.42	964.124	2.0398	1.0331e-08	1.5433e-07
ENSGALG00000001412	777.595	3357.89	-2.1105	1.037e-08	1.5463e-07
ENSGALG00000002150	88.4484	7.51991	3.556	1.036e-08	1.5463e-07
ENSGALG00000003660	240.83	16.5644	3.8619	1.0369e-08	1.5463e-07
ENSGALG00000014692	944.43	132.078	2.8381	1.0424e-08	1.5534e-07
ENSGALG00000035925	374.736	0	Inf	1.0616e-08	1.581e-07
ENSGALG00000030542	1231.94	5079.68	-2.0438	1.0779e-08	1.6043e-07
ENSGALG00000041238	155.912	21.7252	2.8433	1.0928e-08	1.6255e-07
Novel02472	341.624	7.97938	5.42	1.0938e-08	1.626e-07
Novel01284	155.062	699.458	-2.1734	1.0948e-08	1.6265e-07
ENSGALG00000039206	217.251	956.654	-2.1386	1.1051e-08	1.6408e-07
ENSGALG00000008114	572.606	121.002	2.2425	1.1083e-08	1.6445e-07
ENSGALG00000029827	0.902325	388.662	-8.7507	1.1096e-08	1.6453e-07
ENSGALG00000042543	1619.91	372.048	2.1224	1.1111e-08	1.6466e-07
ENSGALG00000016925	580.09	2463.36	-2.0863	1.1218e-08	1.6614e-07
ENSGALG00000026187	2.05412	50.7576	-4.627	1.147e-08	1.6977e-07
ENSGALG00000006341	46.1393	0.923699	5.6424	1.157e-08	1.7115e-07
ENSGALG00000015847	1270.49	295.989	2.1018	1.1914e-08	1.7613e-07
ENSGALG00000037349	47.1004	0	Inf	1.1992e-08	1.7718e-07
ENSGALG00000032915	789.427	175.105	2.1726	1.2058e-08	1.7804e-07
ENSGALG00000042263	7.05602	80.4622	-3.5114	1.2128e-08	1.7897e-07
ENSGALG00000039337	2117.49	8692.48	-2.0374	1.2162e-08	1.7936e-07
ENSGALG00000039311	106.908	1.75192	5.9313	1.2318e-08	1.8155e-07
ENSGALG00000027355	252.936	45.5525	2.4732	1.2351e-08	1.8193e-07
ENSGALG00000037457	117.912	0	Inf	1.2621e-08	1.8579e-07
ENSGALG00000005256	400.046	50.2306	2.9935	1.2651e-08	1.8612e-07
ENSGALG00000036502	368.523	1578.94	-2.0991	1.2693e-08	1.8661e-07
ENSGALG00000001788	2017.75	468.73	2.1059	1.2709e-08	1.8674e-07
ENSGALG00000011581	1874.12	444.528	2.0759	1.2719e-08	1.8677e-07
Novel01050	36.9376	0	Inf	1.2927e-08	1.8971e-07
ENSGALG00000013661	164.339	729.742	-2.1507	1.3064e-08	1.916e-07
ENSGALG00000000745	123.163	3.64732	5.0776	1.3085e-08	1.9179e-07
ENSGALG00000040834	2417.53	589.239	2.0366	1.3385e-08	1.9607e-07
ENSGALG00000029724	279.134	52.0922	2.4218	1.352e-08	1.9794e-07
ENSGALG00000010478	232.181	39.8974	2.5409	1.3863e-08	2.0283e-07
ENSGALG00000002363	3872.5	15682.3	-2.0178	1.4003e-08	2.0476e-07
ENSGALG00000011227	45.9149	0.875695	5.7124	1.4322e-08	2.093e-07
ENSGALG00000012821	3323.47	619.818	2.4228	1.4362e-08	2.0975e-07
ENSGALG00000014788	505.08	109.245	2.2089	1.4472e-08	2.1123e-07
ENSGALG00000034159	52.5188	1.84634	4.8301	1.4538e-08	2.1206e-07
Novel01265	41.1865	0	Inf	1.4635e-08	2.1335e-07
ENSGALG00000024047	821.918	82.8213	3.3109	1.478e-08	2.1534e-07
ENSGALG00000035120	6.1537	73.9467	-3.587	1.5282e-08	2.2251e-07
ENSGALG00000038579	3900.84	0.828221	12.201	1.5355e-08	2.2345e-07
ENSGALG00000029109	101.68	10.4166	3.2871	1.5611e-08	2.2704e-07
ENSGALG00000042851	38.2002	400.413	-3.3898	1.5653e-08	2.2751e-07
ENSGALG00000028032	281.779	1182.72	-2.0695	1.5664e-08	2.2753e-07
ENSGALG00000006763	388.966	1638.16	-2.0744	1.579e-08	2.2922e-07
ENSGALG00000004400	801.454	5527.64	-2.786	1.6199e-08	2.3488e-07
ENSGALG00000038043	73.2511	364.369	-2.3145	1.6192e-08	2.3488e-07
ENSGALG00000004376	191.702	3490.83	-4.1866	1.6602e-08	2.4058e-07
ENSGALG00000010551	277.245	2078.62	-2.9064	1.6798e-08	2.4326e-07
ENSGALG00000030677	101.891	472.951	-2.2147	1.6957e-08	2.4543e-07
ENSGALG00000006856	1305.73	5230.4	-2.0021	1.7e-08	2.459e-07
Novel03060	2.85476	55.9037	-4.2915	1.7254e-08	2.4942e-07
Novel02698	826.112	171.259	2.2702	1.7302e-08	2.4997e-07
ENSGALG00000012020	72.4587	4.88859	3.8897	1.7326e-08	2.5017e-07
ENSGALG00000001605	17.8873	133.748	-2.9025	1.7343e-08	2.5026e-07
ENSGALG00000033203	817.593	5046.73	-2.6259	1.7562e-08	2.5327e-07
ENSGALG00000011319	710.785	162.106	2.1325	1.7729e-08	2.5553e-07
ENSGALG00000031892	40.6822	0.462114	6.46	1.8046e-08	2.5994e-07
ENSGALG00000040184	218.944	37.599	2.5418	1.8272e-08	2.6303e-07
ENSGALG00000002198	372.368	4045.73	-3.4416	1.8476e-08	2.6582e-07
ENSGALG00000002210	17157.3	4151.78	2.047	1.863e-08	2.6787e-07
ENSGALG00000010269	454.732	96.3075	2.2393	1.8697e-08	2.6866e-07
ENSGALG00000042022	0	78.7123	#NAME?	1.8707e-08	2.6866e-07
ENSGALG00000029187	1.07384	39.4058	-5.1976	1.8777e-08	2.695e-07
ENSGALG00000014496	655.802	144.619	2.181	1.9153e-08	2.7458e-07
ENSGALG00000015689	830.519	4192.17	-2.3356	1.9434e-08	2.7844e-07
Novel01080	119.832	14.4268	3.0542	1.9461e-08	2.7867e-07
ENSGALG00000012836	1005.19	235.555	2.0933	1.9525e-08	2.7941e-07
ENSGALG00000003841	251.926	25.545	3.3019	1.976e-08	2.8261e-07
ENSGALG00000002707	95.0669	9.36361	3.3438	2.02e-08	2.8873e-07
ENSGALG00000016356	161.514	23.9835	2.7515	2.0249e-08	2.8908e-07
Novel01469	43.2147	233.062	-2.4311	2.0238e-08	2.8908e-07
ENSGALG00000035493	463.618	99.7079	2.2172	2.041e-08	2.9105e-07
ENSGALG00000039408	390.299	1630.5	-2.0627	2.04e-08	2.9105e-07
ENSGALG00000003709	67.9826	340.587	-2.3248	2.0516e-08	2.9238e-07
ENSGALG00000017173	64.3306	317.711	-2.3041	2.0565e-08	2.929e-07
ENSGALG00000013026	79.078	382.419	-2.2738	2.0842e-08	2.9667e-07
Novel00954	0.210023	31.3309	-7.2209	2.0906e-08	2.9742e-07
ENSGALG00000011689	1610.16	390.597	2.0435	2.1364e-08	3.0357e-07
ENSGALG00000020737	93.2774	467.806	-2.3263	2.1364e-08	3.0357e-07
ENSGALG00000009724	122.441	2.57961	5.5688	2.1711e-08	3.0814e-07
ENSGALG00000035054	40.5928	0.414111	6.6151	2.1711e-08	3.0814e-07
ENSGALG00000040504	210.307	911.844	-2.1163	2.1934e-08	3.1112e-07
ENSGALG00000030397	117.938	14.6241	3.0116	2.1996e-08	3.1182e-07
ENSGALG00000012975	66.0025	3.91795	4.0743	2.2913e-08	3.2462e-07
ENSGALG00000012484	1601.48	390.884	2.0346	2.3488e-08	3.3258e-07
ENSGALG00000038752	39.9676	0.462114	6.4344	2.3505e-08	3.3262e-07
ENSGALG00000042458	3270.18	808.267	2.0165	2.4064e-08	3.4034e-07
ENSGALG00000009855	573.313	129.768	2.1434	2.4081e-08	3.4038e-07
ENSGALG00000020415	241.073	43.3522	2.4753	2.4108e-08	3.4056e-07
ENSGALG00000009641	312709	37493.2	3.0601	2.4359e-08	3.4391e-07
ENSGALG00000000585	513.027	39.506	3.6989	2.4769e-08	3.4929e-07
ENSGALG00000012165	1116.84	269.648	2.0503	2.477e-08	3.4929e-07
ENSGALG00000032023	95.4211	9.9212	3.2657	2.5005e-08	3.524e-07
ENSGALG00000034534	139.801	19.9358	2.8099	2.5326e-08	3.5671e-07
ENSGALG00000004397	288.517	1466.47	-2.3456	2.5762e-08	3.6264e-07
ENSGALG00000043737	0.420045	152.538	-8.5044	2.6025e-08	3.6593e-07
ENSGALG00000035559	132.66	17.8056	2.8973	2.6072e-08	3.6637e-07
ENSGALG00000012377	155.963	789.383	-2.3395	2.6132e-08	3.6701e-07
Novel02971	112.525	5.30429	4.4069	2.6196e-08	3.6769e-07
ENSGALG00000042045	235.586	15.685	3.9088	2.6543e-08	3.7213e-07
ENSGALG00000005849	1034.48	24465.2	-4.5638	2.6856e-08	3.763e-07
ENSGALG00000043137	607.108	2560.02	-2.0761	2.7275e-08	3.8195e-07
ENSGALG00000028900	528.033	117.843	2.1638	2.7483e-08	3.8441e-07
Novel01306	412.772	1675.14	-2.0209	2.7527e-08	3.848e-07
ENSGALG00000007758	153.317	893.693	-2.5433	2.7547e-08	3.8487e-07
ENSGALG00000007525	80.0373	1395.43	-4.1239	2.7841e-08	3.8875e-07
Novel02820	983.361	155.351	2.6622	2.7862e-08	3.8881e-07
ENSGALG00000040275	1014.78	6328.42	-2.6407	2.7892e-08	3.8901e-07
Novel00670	54.3042	0	Inf	2.7953e-08	3.8963e-07
ENSGALG00000016278	423.124	90.5221	2.2247	2.8128e-08	3.9185e-07
Novel00981	730.362	2941.39	-2.0098	2.8146e-08	3.9187e-07
ENSGALG00000010122	213.549	26.4898	3.0111	2.865e-08	3.9866e-07
ENSGALG00000009731	585.171	132.061	2.1477	2.9211e-08	4.0623e-07
ENSGALG00000004003	595.991	2409.49	-2.0154	2.9471e-08	4.0961e-07
ENSGALG00000034512	893.637	3624.65	-2.0201	2.9775e-08	4.136e-07
ENSGALG00000033867	1203.12	239.869	2.3265	3.0193e-08	4.1916e-07
ENSGALG00000015442	87.9536	417.141	-2.2457	3.0574e-08	4.2421e-07
Novel01992	25.7799	723.32	-4.8103	3.0955e-08	4.2924e-07
ENSGALG00000011271	12206.8	2047.96	2.5754	3.1003e-08	4.2966e-07
ENSGALG00000008231	1181.32	4912.92	-2.0562	3.1451e-08	4.3562e-07
ENSGALG00000033381	3415.12	0.461585	12.853	3.1529e-08	4.3646e-07
ENSGALG00000038224	562.029	2689.4	-2.2586	3.1559e-08	4.3661e-07
ENSGALG00000032676	118.424	6.22693	4.2493	3.2116e-08	4.4407e-07
ENSGALG00000033760	172.802	1462.27	-3.081	3.237e-08	4.4733e-07
Novel01613	5.81974	70.7847	-3.6044	3.2438e-08	4.48e-07
ENSGALG00000040927	119.115	1140.53	-3.2593	3.2832e-08	4.5319e-07
ENSGALG00000039428	763.384	178.355	2.0977	3.3182e-08	4.5777e-07
ENSGALG00000000516	122.853	15.7678	2.9619	3.3216e-08	4.5797e-07
ENSGALG00000004448	68.2419	3.775	4.1761	3.3666e-08	4.6392e-07
ENSGALG00000041878	34.2961	0	Inf	3.4367e-08	4.733e-07
ENSGALG00000016444	2514.31	467.709	2.4265	3.4712e-08	4.7778e-07
ENSGALG00000012018	22.3309	254.998	-3.5134	3.5098e-08	4.8281e-07
ENSGALG00000000883	1055.74	4234.44	-2.0039	3.5304e-08	4.8537e-07
Novel01980	48.5042	249.815	-2.3647	3.5381e-08	4.8616e-07
ENSGALG00000002621	92.5518	890.533	-3.2663	3.5784e-08	4.9114e-07
ENSGALG00000034795	69.3576	3.0892	4.4887	3.5771e-08	4.9114e-07
ENSGALG00000006099	649.007	113.565	2.5147	3.5844e-08	4.9169e-07
ENSGALG00000014624	198.816	33.5101	2.5688	3.6342e-08	4.9823e-07
ENSGALG00000024298	218.867	2320.5	-3.4063	3.6583e-08	5.0068e-07
ENSGALG00000012792	666.806	2702.41	-2.0189	3.6782e-08	5.0311e-07
Novel02103	17.6672	711.908	-5.3325	3.6922e-08	5.0475e-07
ENSGALG00000040397	168.892	27.0258	2.6437	3.751e-08	5.125e-07
ENSGALG00000002845	50.3984	731.581	-3.8596	3.764e-08	5.1399e-07
ENSGALG00000028225	86.5188	1.75245	5.6256	3.7708e-08	5.1462e-07
ENSGALG00000014701	225.829	1181.01	-2.3867	3.8188e-08	5.2029e-07
Novel01072	135.477	0	Inf	3.8499e-08	5.2423e-07
ENSGALG00000016511	463.129	29.2514	3.9848	3.8808e-08	5.2813e-07
ENSGALG00000041202	465.937	13927.4	-4.9016	3.9022e-08	5.3076e-07
Novel02473	13896.5	819.276	4.0842	3.9768e-08	5.406e-07
ENSGALG00000012462	344.497	71.7069	2.2643	4.0167e-08	5.4541e-07
ENSGALG00000027353	237.304	8675.64	-5.1922	4.0154e-08	5.4541e-07
ENSGALG00000033643	189.745	31.8658	2.574	4.02e-08	5.4554e-07
Novel01652	33.8932	0	Inf	4.0319e-08	5.4686e-07
ENSGALG00000023781	110.346	13.6155	3.0187	4.0598e-08	5.5033e-07
ENSGALG00000021230	256.738	32.6751	2.974	4.1399e-08	5.6055e-07
ENSGALG00000036972	139.884	20.7656	2.752	4.1458e-08	5.6104e-07
Novel02545	657.037	150.193	2.1292	4.1905e-08	5.6677e-07
Novel00044	57.3134	299.2	-2.3842	4.1975e-08	5.6741e-07
ENSGALG00000025972	4522.31	968.953	2.2226	4.2233e-08	5.7057e-07
ENSGALG00000039343	90.446	9.65004	3.2285	4.2425e-08	5.7284e-07
ENSGALG00000034054	5891.26	4.88965	10.235	4.2735e-08	5.767e-07
ENSGALG00000001206	10.9552	94.4311	-3.1077	4.3247e-08	5.8329e-07
ENSGALG00000034346	767.351	179.53	2.0957	4.3539e-08	5.869e-07
ENSGALG00000043381	112.469	14.1098	2.9948	4.3823e-08	5.9041e-07
ENSGALG00000002581	571.36	129.447	2.142	4.3945e-08	5.9171e-07
ENSGALG00000033404	838.873	204.341	2.0375	4.4088e-08	5.933e-07
ENSGALG00000026332	126.516	17.4891	2.8548	4.4475e-08	5.9818e-07
Novel01324	176.002	29.5753	2.5731	4.4687e-08	6.0071e-07
Novel03303	0.48228	32.9493	-6.0942	4.4833e-08	6.0233e-07
ENSGALG00000030645	799.011	5681.9	-2.8301	4.4972e-08	6.0386e-07
ENSGALG00000035108	130.379	578.187	-2.1488	4.5592e-08	6.1185e-07
ENSGALG00000020488	763.158	181.536	2.0717	4.6015e-08	6.1718e-07
ENSGALG00000013225	107.944	12.8226	3.0735	4.7278e-08	6.3376e-07
ENSGALG00000035131	33.8334	0	Inf	4.7862e-08	6.4089e-07
ENSGALG00000042385	34.4421	287.626	-3.0619	4.8136e-08	6.4419e-07
ENSGALG00000012015	58.9021	0.461585	6.9956	4.9056e-08	6.5614e-07
ENSGALG00000013907	397.557	1596.1	-2.0053	4.9309e-08	6.5917e-07
ENSGALG00000011291	163.479	1983.29	-3.6007	4.9811e-08	6.6551e-07
ENSGALG00000010049	242.089	2443.07	-3.3351	5.0129e-08	6.6938e-07
ENSGALG00000005839	42.6392	0.92317	5.5294	5.0452e-08	6.7295e-07
ENSGALG00000016022	58.2935	3.08973	4.2378	5.045e-08	6.7295e-07
ENSGALG00000008855	1284.31	19986.4	-3.96	5.1289e-08	6.8374e-07
Novel02297	60.022	3.59932	4.0597	5.2256e-08	6.9625e-07
ENSGALG00000008676	3011.52	738.21	2.0284	5.3053e-08	7.0648e-07
Novel01601	335.335	72.643	2.2067	5.3244e-08	7.0862e-07
ENSGALG00000009149	2388.08	436.071	2.4532	5.4254e-08	7.2167e-07
ENSGALG00000004322	41.8193	0.923699	5.5006	5.4467e-08	7.2411e-07
ENSGALG00000042670	1924.18	118.888	4.0166	5.4966e-08	7.3035e-07
ENSGALG00000014442	37331.2	237635	-2.6703	5.6411e-08	7.4872e-07
ENSGALG00000016127	496.816	3456.22	-2.7984	5.7079e-08	7.5717e-07
ENSGALG00000015599	273.382	5.49683	5.6362	5.8031e-08	7.6895e-07
ENSGALG00000041470	76.096	1416.99	-4.2189	5.8016e-08	7.6895e-07
ENSGALG00000002282	328.618	68.7194	2.2576	5.8515e-08	7.7409e-07
Novel02587	357.777	6425.18	-4.1666	5.8706e-08	7.7619e-07
ENSGALG00000011861	73.9853	6.17999	3.5816	5.8768e-08	7.7658e-07
Novel01115	68.4305	1588.98	-4.5373	5.8896e-08	7.7785e-07
ENSGALG00000032980	161.195	24.6873	2.707	5.9055e-08	7.7952e-07
ENSGALG00000034387	333.718	2363.79	-2.8244	5.9128e-08	7.7963e-07
ENSGALG00000037533	240.237	9.40896	4.6743	5.9117e-08	7.7963e-07
ENSGALG00000012387	733.656	175.678	2.0622	5.9486e-08	7.835e-07
ENSGALG00000002804	147.916	6.78505	4.4463	5.9635e-08	7.8503e-07
ENSGALG00000041640	960.815	63.8762	3.9109	5.9848e-08	7.8742e-07
ENSGALG00000040084	114.747	498.726	-2.1198	6.1161e-08	8.0425e-07
ENSGALG00000030124	51.896	827.753	-3.9955	6.2227e-08	8.1738e-07
ENSGALG00000029102	770.658	101.945	2.9183	6.239e-08	8.1907e-07
ENSGALG00000009755	825.577	200.139	2.0444	6.2763e-08	8.2352e-07
ENSGALG00000030012	565.767	19.6045	4.851	6.3396e-08	8.3138e-07
ENSGALG00000001977	853.284	45584.8	-5.7394	6.4466e-08	8.4404e-07
ENSGALG00000041456	12.9019	103.972	-3.0105	6.5942e-08	8.6289e-07
ENSGALG00000031119	156.142	25.325	2.6242	6.6731e-08	8.7274e-07
ENSGALG00000038649	224.617	42.5456	2.4004	6.6972e-08	8.7542e-07
ENSGALG00000004613	457.692	2503.93	-2.4517	6.8363e-08	8.9264e-07
ENSGALG00000032013	210.958	1993.36	-3.2402	6.9947e-08	9.127e-07
Novel02141	106.15	13.2394	3.0032	6.9976e-08	9.127e-07
ENSGALG00000034349	99.315	11.7238	3.0826	7.1538e-08	9.3157e-07
ENSGALG00000007507	168.311	28.5777	2.5582	7.1971e-08	9.362e-07
ENSGALG00000017148	81.8798	8.21993	3.3163	7.2866e-08	9.4683e-07
Novel00671	418.371	96.6572	2.1138	7.3973e-08	9.6069e-07
ENSGALG00000008905	13.7405	105.187	-2.9364	7.5463e-08	9.7795e-07
ENSGALG00000006379	430.015	3.09026	7.1205	7.5741e-08	9.8102e-07
ENSGALG00000036270	789.986	194.604	2.0213	7.6414e-08	9.8921e-07
ENSGALG00000033315	3542.38	179.908	4.2994	7.7112e-08	9.9689e-07
Novel01142	55.2227	0.462114	6.9009	7.8059e-08	1.0078e-06
ENSGALG00000036711	177.07	31.0592	2.5112	7.8737e-08	1.016e-06
ENSGALG00000005266	592.715	146.288	2.0185	7.8808e-08	1.0164e-06
ENSGALG00000006598	386.802	85.2906	2.1811	8.0618e-08	1.0392e-06
ENSGALG00000008914	213.553	23996.6	-6.8121	8.2431e-08	1.0608e-06
Novel01141	63.4686	0.924228	6.1017	8.2693e-08	1.0637e-06
Novel01312	97.0637	4.88859	4.3114	8.3246e-08	1.0702e-06
ENSGALG00000019690	361.45	78.9677	2.1945	8.3585e-08	1.074e-06
ENSGALG00000034392	40.9467	0.924228	5.4694	8.6668e-08	1.1118e-06
ENSGALG00000013626	482.819	112.573	2.1006	8.6999e-08	1.1155e-06
ENSGALG00000012612	15.2943	6077.29	-8.6343	8.7553e-08	1.122e-06
ENSGALG00000032108	55.6239	3.18521	4.1262	8.9602e-08	1.1476e-06
ENSGALG00000006346	4534.48	279.327	4.0209	9.0361e-08	1.1567e-06
ENSGALG00000038529	250.299	49.5016	2.3381	9.1505e-08	1.1701e-06
Novel01536	920.96	0	Inf	9.2584e-08	1.1827e-06
ENSGALG00000006069	2197.14	22519.9	-3.3575	9.3585e-08	1.1942e-06
ENSGALG00000011998	2068.82	262.632	2.9777	9.3971e-08	1.1985e-06
ENSGALG00000031267	0	25.0053	#NAME?	9.408e-08	1.1993e-06
ENSGALG00000012155	58.0753	709.32	-3.6104	9.4265e-08	1.201e-06
Novel01598	125.135	5.20829	4.5865	9.5384e-08	1.2133e-06
ENSGALG00000007186	196.694	36.7428	2.4204	9.6906e-08	1.232e-06
ENSGALG00000027462	2223.05	259.667	3.0978	9.834e-08	1.2483e-06
ENSGALG00000033661	54.4215	269.179	-2.3063	9.9947e-08	1.2656e-06
ENSGALG00000037206	102.316	609.754	-2.5752	9.9964e-08	1.2656e-06
ENSGALG00000010721	58.6241	3.13826	4.2235	1.0107e-07	1.2789e-06
ENSGALG00000023691	353.38	61.793	2.5157	1.0211e-07	1.2914e-06
ENSGALG00000001926	2392.23	21987.5	-3.2003	1.0339e-07	1.3056e-06
ENSGALG00000008514	122.626	516.521	-2.0746	1.0376e-07	1.3095e-06
ENSGALG00000039327	364.493	80.9897	2.1701	1.0382e-07	1.3096e-06
ENSGALG00000003972	22.6482	145.044	-2.679	1.0426e-07	1.3144e-06
ENSGALG00000031997	323.521	1.38528	7.8675	1.0498e-07	1.3214e-06
ENSGALG00000008697	28.3756	642.892	-4.5019	1.0599e-07	1.3328e-06
ENSGALG00000004662	158.484	647.836	-2.0313	1.0657e-07	1.3394e-06
ENSGALG00000003855	696.398	170.933	2.0265	1.1027e-07	1.3837e-06
ENSGALG00000006560	556.451	135.849	2.0342	1.112e-07	1.3947e-06
ENSGALG00000000802	654.025	158.617	2.0438	1.1159e-07	1.3989e-06
ENSGALG00000004660	181.685	32.5199	2.482	1.1242e-07	1.4085e-06
ENSGALG00000031363	203.247	39.0871	2.3785	1.1404e-07	1.428e-06
ENSGALG00000000107	276.981	4461	-4.0095	1.1561e-07	1.4462e-06
ENSGALG00000010115	434.693	100.57	2.1118	1.1572e-07	1.4469e-06
ENSGALG00000030407	390.025	2062.94	-2.4031	1.1621e-07	1.4523e-06
ENSGALG00000038850	1278.36	11252.4	-3.1379	1.1785e-07	1.4704e-06
ENSGALG00000037504	659.276	134.996	2.288	1.2155e-07	1.5135e-06
Novel00046	353.403	80.8018	2.1289	1.217e-07	1.5145e-06
ENSGALG00000012958	107.79	14.3967	2.9044	1.2228e-07	1.521e-06
ENSGALG00000030782	185.467	34.1817	2.4399	1.2392e-07	1.5406e-06
ENSGALG00000010633	1730.07	149.824	3.5295	1.246e-07	1.5483e-06
ENSGALG00000017064	543.479	130.029	2.0634	1.259e-07	1.5636e-06
ENSGALG00000016332	165.148	28.7033	2.5245	1.2642e-07	1.5693e-06
ENSGALG00000006344	306.841	4813.35	-3.9715	1.2659e-07	1.5706e-06
Novel02641	2.59957	45.1865	-4.1195	1.27e-07	1.5748e-06
ENSGALG00000004986	2979.02	705.664	2.0778	1.2713e-07	1.5757e-06
ENSGALG00000005848	1434.38	235.471	2.6068	1.2988e-07	1.6072e-06
ENSGALG00000009405	59.4863	4.06037	3.8729	1.2981e-07	1.6072e-06
ENSGALG00000032462	877.058	4287.05	-2.2892	1.3033e-07	1.612e-06
ENSGALG00000035583	119.104	16.9774	2.8105	1.332e-07	1.6459e-06
ENSGALG00000004004	945.247	6402.25	-2.7598	1.349e-07	1.666e-06
ENSGALG00000036780	65.7132	2.77057	4.5679	1.4086e-07	1.7386e-06
ENSGALG00000034756	129.526	976.792	-2.9148	1.4105e-07	1.7401e-06
ENSGALG00000013632	502.205	8090.09	-4.0098	1.4431e-07	1.7794e-06
ENSGALG00000013615	332.269	1464.23	-2.1397	1.4483e-07	1.785e-06
ENSGALG00000026534	655.425	50.7059	3.6922	1.4571e-07	1.7949e-06
ENSGALG00000004386	232.113	46.7879	2.3106	1.4885e-07	1.8298e-06
Novel01389	85.2817	9.12676	3.2241	1.4879e-07	1.8298e-06
ENSGALG00000029842	72.5352	323.567	-2.1573	1.5873e-07	1.9483e-06
ENSGALG00000043415	39.5037	0.876224	5.4945	1.5947e-07	1.9564e-06
ENSGALG00000006635	2.01467	43.5432	-4.4338	1.5979e-07	1.9593e-06
ENSGALG00000008351	510.514	4298.34	-3.0738	1.6146e-07	1.9778e-06
Novel00866	0.684706	32.234	-5.557	1.6695e-07	2.0419e-06
ENSGALG00000039822	39.2144	0.876224	5.4839	1.6759e-07	2.0488e-06
ENSGALG00000042030	4809.22	252.274	4.2527	1.699e-07	2.0749e-06
ENSGALG00000026038	163.345	27.9848	2.5452	1.71e-07	2.0872e-06
ENSGALG00000009730	68.2345	1252.5	-4.1982	1.7228e-07	2.1018e-06
ENSGALG00000037748	423.447	77.4885	2.4501	1.7465e-07	2.1285e-06
Novel01267	64.8563	5.4003	3.5861	1.7779e-07	2.1657e-06
Novel01083	242.278	50.0549	2.2751	1.8007e-07	2.1924e-06
ENSGALG00000012419	30.711	0	Inf	1.805e-07	2.1966e-06
ENSGALG00000009722	232.316	38.8788	2.579	1.8313e-07	2.2275e-06
ENSGALG00000002048	68.5022	5.62187	3.607	1.8376e-07	2.234e-06
ENSGALG00000026295	203.872	40.0055	2.3494	1.8411e-07	2.2371e-06
Novel01527	17.287	113.489	-2.7148	1.8423e-07	2.2374e-06
ENSGALG00000015196	484.635	117.482	2.0445	1.8579e-07	2.2552e-06
ENSGALG00000031593	12764.9	901.92	3.823	1.8708e-07	2.2698e-06
ENSGALG00000030295	123.002	2.62867	5.5482	1.8944e-07	2.2972e-06
ENSGALG00000015375	11.6689	102.148	-3.1299	1.9021e-07	2.3054e-06
ENSGALG00000031678	38.8214	205.976	-2.4076	1.9741e-07	2.3867e-06
ENSGALG00000007706	48.0218	2.30951	4.378	1.996e-07	2.412e-06
ENSGALG00000001983	48.1624	2.2135	4.4435	2.0313e-07	2.4521e-06
ENSGALG00000033181	27.3688	180.428	-2.7208	2.0384e-07	2.4596e-06
ENSGALG00000033491	32.6291	0	Inf	2.0574e-07	2.48e-06
Novel01170	123.075	18.8285	2.7085	2.0708e-07	2.4937e-06
ENSGALG00000011572	313.217	70.0224	2.1613	2.0779e-07	2.501e-06
ENSGALG00000034722	220.484	45.5699	2.2745	2.1534e-07	2.588e-06
ENSGALG00000002897	65.1748	5.39818	3.5938	2.1884e-07	2.6274e-06
Novel02689	23.3837	5465.22	-7.8686	2.2187e-07	2.6625e-06
Novel03000	26.6227	181.079	-2.7659	2.2342e-07	2.6797e-06
ENSGALG00000032184	244.351	13.2357	4.2065	2.2411e-07	2.6866e-06
ENSGALG00000001392	275.121	43.5047	2.6608	2.2623e-07	2.7108e-06
ENSGALG00000041921	107.355	8.2194	3.7072	2.2727e-07	2.7219e-06
ENSGALG00000025786	1.85169	41.5338	-4.4874	2.2897e-07	2.7394e-06
ENSGALG00000007371	97.866	12.9139	2.9219	2.2985e-07	2.7473e-06
ENSGALG00000011962	885.4	33.3234	4.7317	2.2981e-07	2.7473e-06
ENSGALG00000001709	214.89	9667.05	-5.4914	2.3048e-07	2.7534e-06
ENSGALG00000019873	238.093	982.564	-2.045	2.3261e-07	2.7775e-06
ENSGALG00000036255	67.2462	0	Inf	2.3316e-07	2.7827e-06
ENSGALG00000029182	105108	10176.8	3.3685	2.3478e-07	2.8007e-06
ENSGALG00000007631	53.1686	2.72415	4.2867	2.3768e-07	2.8339e-06
ENSGALG00000013604	234.321	31.3594	2.9015	2.3803e-07	2.8366e-06
ENSGALG00000032680	16.2069	104.853	-2.6937	2.3862e-07	2.8423e-06
ENSGALG00000016803	193.984	39.2517	2.3051	2.3927e-07	2.8472e-06
ENSGALG00000028294	650.751	136.212	2.2562	2.4119e-07	2.8686e-06
ENSGALG00000005814	105.376	1228.37	-3.5431	2.4985e-07	2.9702e-06
ENSGALG00000023904	2974.24	202.581	3.8759	2.504e-07	2.9752e-06
Novel01899	52.6446	3.18415	4.0473	2.5075e-07	2.978e-06
ENSGALG00000039118	479.408	118.957	2.0108	2.5607e-07	3.0351e-06
ENSGALG00000007488	892.616	58.813	3.9238	2.5643e-07	3.038e-06
ENSGALG00000015854	534.392	133.306	2.0032	2.6521e-07	3.1343e-06
ENSGALG00000000894	4619.4	121.965	5.2432	2.6805e-07	3.1632e-06
ENSGALG00000038000	34.5302	0.414111	6.3817	2.7055e-07	3.1911e-06
ENSGALG00000011405	298.737	3432.54	-3.5223	2.7303e-07	3.2188e-06
ENSGALG00000031208	149.569	750.351	-2.3268	2.7509e-07	3.2415e-06
ENSGALG00000043764	38.3114	0.828221	5.5316	2.7565e-07	3.2465e-06
Novel02684	274.807	60.298	2.1882	2.7982e-07	3.2892e-06
ENSGALG00000028145	109.17	440.637	-2.013	2.8607e-07	3.3595e-06
ENSGALG00000005801	159.556	29.0251	2.4587	2.883e-07	3.3807e-06
Novel02486	65.8426	5.76535	3.5135	2.908e-07	3.4067e-06
ENSGALG00000009172	82.8202	346.08	-2.0631	2.9136e-07	3.4116e-06
ENSGALG00000006639	150.32	26.2809	2.5159	2.9298e-07	3.4289e-06
ENSGALG00000023420	189.286	37.4618	2.3371	2.9377e-07	3.4364e-06
ENSGALG00000035772	187.828	36.3947	2.3676	2.9529e-07	3.4526e-06
ENSGALG00000043139	187.671	8.02527	4.5475	2.9768e-07	3.4788e-06
ENSGALG00000008105	82.2898	0.461585	7.478	3.0134e-07	3.5172e-06
ENSGALG00000008835	178.917	33.1905	2.4304	3.014e-07	3.5172e-06
ENSGALG00000003073	351.399	61.1758	2.5221	3.0221e-07	3.525e-06
ENSGALG00000000226	96.9842	12.9165	2.9085	3.0614e-07	3.5673e-06
ENSGALG00000002201	1979.66	427.693	2.2106	3.0854e-07	3.5936e-06
ENSGALG00000036346	61.5859	1572.54	-4.6744	3.0957e-07	3.6038e-06
ENSGALG00000042354	47.5387	224.337	-2.2385	3.0997e-07	3.6067e-06
ENSGALG00000036081	274.215	1568.03	-2.5156	3.1085e-07	3.6153e-06
ENSGALG00000011865	672.451	2726.94	-2.0198	3.1265e-07	3.6345e-06
Novel01783	10.0747	81.0657	-3.0084	3.1887e-07	3.7031e-06
ENSGALG00000021025	52.1218	3.04225	4.0987	3.1984e-07	3.7127e-06
ENSGALG00000029150	1320.98	31640.7	-4.5821	3.2733e-07	3.7978e-06
ENSGALG00000001006	238.836	52.5263	2.1849	3.2817e-07	3.8057e-06
ENSGALG00000032986	43.1353	204.664	-2.2463	3.3049e-07	3.8307e-06
ENSGALG00000037173	171.16	791.917	-2.21	3.3349e-07	3.86e-06
ENSGALG00000003294	487.483	121.347	2.0062	3.3497e-07	3.8752e-06
ENSGALG00000026776	156.505	2073.98	-3.7281	3.4485e-07	3.9858e-06
Novel03067	202.638	37.5235	2.433	3.459e-07	3.996e-06
ENSGALG00000007447	753.295	141.736	2.41	3.4811e-07	4.0173e-06
ENSGALG00000025444	95.3069	12.3083	2.953	3.4824e-07	4.0173e-06
ENSGALG00000035237	221.879	3896.61	-4.1344	3.4888e-07	4.0227e-06
ENSGALG00000007899	522.463	2207.86	-2.0792	3.5144e-07	4.0503e-06
ENSGALG00000034716	152.432	26.9313	2.5008	3.5529e-07	4.086e-06
ENSGALG00000031340	167.122	32.1269	2.379	3.5717e-07	4.0987e-06
ENSGALG00000034964	365.955	2.72415	7.0697	3.5758e-07	4.1015e-06
ENSGALG00000034741	301.669	4834.24	-4.0023	3.591e-07	4.1131e-06
[truncated: 1,908 more rows]

## Sheet: E12 vs 10w
Gene_id	readcount_H_E12_F	readcount_H_10w_F	log2FoldChange	pval	padj
ENSGALG00000032672	9367.97	3.05569	11.582	5.4909e-146	1.341e-141
ENSGALG00000031403	220.881	99552.6	-8.816	2.5777e-135	3.1476e-131
ENSGALG00000012612	16.9274	8416.73	-8.9578	8.8214e-125	7.1812e-121
ENSGALG00000015602	14.5072	32977.1	-11.15	5.6179e-121	3.43e-117
ENSGALG00000012790	5946.59	11.8837	8.9669	2.9518e-118	1.4418e-114
ENSGALG00000042024	1.28424	7158.55	-12.445	2.1236e-113	8.6437e-110
ENSGALG00000010928	2517.73	0.410131	12.584	5.3861e-112	1.8791e-108
ENSGALG00000034427	13.9345	3995.37	-8.1635	1.0899e-105	3.3273e-102
ENSGALG00000005972	3.68266	2126.83	-9.1737	4.9861e-103	1.353e-99
ENSGALG00000042581	86.3597	12771.5	-7.2084	7.2967e-101	1.782e-97
ENSGALG00000000608	5375.46	26.0077	7.6913	1.0354e-100	2.2988e-97
ENSGALG00000010657	2390.99	1.93797	10.269	2.7843e-98	5.6665e-95
ENSGALG00000033271	608.281	75819.6	-6.9617	1.2725e-97	2.2197e-94
Novel01712	49.5791	7767.92	-7.2917	1.2096e-97	2.2197e-94
Novel02761	1108.75	128584	-6.8576	1.3078e-95	2.1293e-92
ENSGALG00000014848	153.332	18028.8	-6.8775	1.4046e-94	2.144e-91
ENSGALG00000011086	8939.71	915228	-6.6778	4.0604e-93	5.8331e-90
ENSGALG00000005226	237.768	26417	-6.7958	5.3539e-93	7.264e-90
ENSGALG00000042386	2916.78	0.410131	12.796	1.6137e-89	2.0742e-86
ENSGALG00000010614	1353.08	108565	-6.3262	1.7644e-87	2.1545e-84
ENSGALG00000009700	338.566	26669.1	-6.2996	5.1419e-86	5.9797e-83
ENSGALG00000011016	589.712	43343.5	-6.1997	3.8759e-85	4.3026e-82
Novel02501	285.702	21896.1	-6.26	7.0015e-85	7.4344e-82
ENSGALG00000013056	11.4269	1848.8	-7.338	1.5955e-83	1.6235e-80
ENSGALG00000011270	3730.04	19.9935	7.5435	2.7832e-83	2.7188e-80
ENSGALG00000032845	1.39227	1409.18	-9.9832	9.9973e-82	9.3906e-79
ENSGALG00000041352	67.15	6821.16	-6.6665	1.5322e-80	1.3859e-77
Novel03041	3706.93	41.5173	6.4804	1.3138e-79	1.1459e-76
ENSGALG00000010259	88.5642	6770.17	-6.2563	1.3707e-79	1.1543e-76
ENSGALG00000011358	1351.46	5.60133	7.9145	1.4991e-79	1.2204e-76
ENSGALG00000008814	7.05488	1360.91	-7.5917	2.3773e-79	1.8728e-76
ENSGALG00000006273	262.807	23010.3	-6.4521	1.7751e-78	1.3548e-75
Novel03257	6.97791	1287.36	-7.5274	3.4153e-78	2.5276e-75
ENSGALG00000030247	211.662	12732.4	-5.9106	2.3274e-77	1.6718e-74
ENSGALG00000034680	188.065	54786.2	-8.1864	8.0984e-77	5.6508e-74
ENSGALG00000005077	20.6352	1990.87	-6.5921	3.8105e-76	2.585e-73
ENSGALG00000038304	1794.84	14.2436	6.9774	3.9852e-76	2.6305e-73
ENSGALG00000032385	61.3764	9318.06	-7.2462	2.6791e-75	1.7218e-72
ENSGALG00000006591	3275.54	177786	-5.7623	3.9549e-75	2.4766e-72
ENSGALG00000029697	13.0059	2571.14	-7.6271	7.5921e-75	4.6353e-72
ENSGALG00000006572	5934.07	314351	-5.7272	4.973e-74	2.9622e-71
ENSGALG00000011740	173.745	8757.47	-5.6555	2.4887e-73	1.4471e-70
ENSGALG00000028949	237.929	12855.7	-5.7557	5.5089e-73	3.1288e-70
ENSGALG00000010927	1394.8	10.6019	7.0396	1.7398e-72	9.6567e-70
ENSGALG00000026553	584.22	30115.8	-5.6879	2.7451e-72	1.4898e-69
ENSGALG00000013634	11.7733	1349.28	-6.8405	1.1063e-71	5.8734e-69
ENSGALG00000043727	149.972	7420.15	-5.6287	2.428e-70	1.2616e-67
ENSGALG00000004594	1195.72	49687.5	-5.3769	2.4869e-70	1.2653e-67
ENSGALG00000002108	2878.66	0.442728	12.667	1.8802e-69	9.3713e-67
ENSGALG00000042405	53.422	6520.88	-6.9315	2.0998e-69	1.0256e-66
ENSGALG00000034615	169.756	7775.25	-5.5174	3.0421e-69	1.4293e-66
ENSGALG00000039681	3570.01	63.4187	5.8149	3.0433e-69	1.4293e-66
Novel01646	97.8535	4691.12	-5.5832	2.6419e-68	1.2174e-65
ENSGALG00000040529	820.305	2.93611	8.1261	5.0071e-68	2.2645e-65
ENSGALG00000019157	180.903	8220.21	-5.5059	8.8354e-68	3.9232e-65
Novel01534	2327.8	0	Inf	1.1548e-67	5.0362e-65
ENSGALG00000008306	51.8959	2727.65	-5.7159	1.1924e-67	5.1088e-65
ENSGALG00000007335	10.9542	1134.34	-6.6942	1.5606e-67	6.5712e-65
ENSGALG00000000299	773.301	1.06137	9.509	7.0604e-67	2.9225e-64
ENSGALG00000005554	232.404	9540.63	-5.3594	1.223e-66	4.9781e-64
ENSGALG00000037498	376.371	15793.8	-5.3911	6.9812e-66	2.795e-63
ENSGALG00000026536	94.0798	4856.66	-5.6899	9.163e-66	3.6093e-63
ENSGALG00000006300	3001.82	104558	-5.1223	2.9017e-65	1.1249e-62
ENSGALG00000005007	12.8353	1100.02	-6.4213	7.4536e-65	2.8442e-62
ENSGALG00000009435	140.26	6102.24	-5.4432	1.1349e-64	4.2642e-62
ENSGALG00000042362	856.147	36804.8	-5.4259	1.3649e-64	5.0505e-62
ENSGALG00000005843	4650.25	174348	-5.2285	5.5792e-64	2.0337e-61
ENSGALG00000032193	23.271	1458.49	-5.9698	3.3208e-63	1.1926e-60
ENSGALG00000017272	460.087	15447.8	-5.0694	5.7662e-63	2.0409e-60
ENSGALG00000016415	821.536	2.53483	8.3403	7.777e-63	2.7133e-60
ENSGALG00000001405	1108.78	13.4361	6.3667	1.1006e-62	3.7858e-60
ENSGALG00000007110	54.8328	2324.72	-5.4059	1.0305e-60	3.4954e-58
ENSGALG00000001605	19.8141	1185.97	-5.9034	1.9643e-60	6.5717e-58
ENSGALG00000031960	2300.83	39.933	5.8484	2.2442e-60	7.4065e-58
ENSGALG00000002638	147.424	5336.98	-5.178	4.9928e-60	1.6258e-57
ENSGALG00000034025	208.072	6553.23	-4.9771	8.0919e-60	2.6003e-57
ENSGALG00000042652	1.58605	905.153	-9.1566	1.0436e-59	3.3101e-57
ENSGALG00000016300	25.6423	1435.78	-5.8072	1.1059e-59	3.4625e-57
ENSGALG00000039712	61.2944	2512.47	-5.3572	1.4285e-59	4.416e-57
ENSGALG00000040993	1399.1	27.5831	5.6646	1.0473e-58	3.197e-56
ENSGALG00000036840	246.067	7253.89	-4.8816	2.5552e-58	7.704e-56
ENSGALG00000005407	928.795	25995.1	-4.8067	7.1615e-58	2.1329e-55
ENSGALG00000035845	382.01	11558.3	-4.9192	1.2998e-57	3.8247e-55
ENSGALG00000012541	40.0605	51634.9	-10.332	1.548e-57	4.5006e-55
ENSGALG00000009089	200.311	6487.56	-5.0174	2.1255e-57	6.1071e-55
ENSGALG00000011447	29.6308	1382.2	-5.5437	2.4275e-57	6.8936e-55
ENSGALG00000042317	38.3222	1550.23	-5.3382	1.2561e-56	3.5261e-54
ENSGALG00000003283	230.974	6322.33	-4.7747	4.1979e-56	1.165e-53
ENSGALG00000013414	266.61	25918.8	-6.6031	6.3324e-56	1.7376e-53
ENSGALG00000002907	11521.4	305665	-4.7296	1.0988e-55	2.9818e-53
ENSGALG00000009302	470.001	0.852859	9.1061	2.6636e-55	7.1485e-53
Novel02711	0.232046	362.902	-10.611	3.9035e-55	1.0362e-52
ENSGALG00000042303	799.424	10.6405	6.2313	6.3237e-55	1.6606e-52
ENSGALG00000041671	417.662	0	Inf	8.1368e-55	2.114e-52
ENSGALG00000008909	229.313	6450.13	-4.8139	9.9353e-55	2.5541e-52
ENSGALG00000041043	46.6462	16260.2	-8.4454	1.4692e-54	3.7376e-52
ENSGALG00000014695	17.9046	1251	-6.1266	1.5624e-54	3.9336e-52
ENSGALG00000005996	62.0641	2169.46	-5.1274	2.9497e-54	7.3507e-52
ENSGALG00000034868	5803.51	129.253	5.4887	3.043e-54	7.5068e-52
ENSGALG00000032534	2940.09	74541.6	-4.6641	3.3251e-54	8.1206e-52
ENSGALG00000039623	66.4055	10927.8	-7.3625	4.6762e-54	1.1307e-51
ENSGALG00000026572	234.698	11335.9	-5.594	7.0081e-54	1.6779e-51
ENSGALG00000003816	57.0394	1841.08	-5.0125	1.1407e-53	2.7047e-51
ENSGALG00000030629	1125.85	1.17405	9.9053	1.4581e-53	3.4239e-51
ENSGALG00000012775	821.703	0	Inf	3.1299e-53	7.2799e-51
ENSGALG00000001518	397.39	0	Inf	3.3036e-53	7.6114e-51
ENSGALG00000005995	618.027	6.03325	6.6786	3.6627e-53	8.36e-51
ENSGALG00000038520	66.3243	1998.54	-4.9133	4.4048e-53	9.9607e-51
ENSGALG00000037744	947.202	24003.9	-4.6635	4.6331e-53	1.0381e-50
ENSGALG00000026875	145.133	4087.45	-4.8158	5.3966e-53	1.1981e-50
ENSGALG00000016864	342.623	8188.9	-4.579	1.5457e-52	3.4009e-50
ENSGALG00000032903	174.258	4354.81	-4.6433	2.9252e-52	6.3785e-50
ENSGALG00000009705	294.026	7905.76	-4.7489	4.0317e-52	8.7135e-50
ENSGALG00000013900	517.466	3.70003	7.1278	7.405e-52	1.5864e-49
ENSGALG00000014221	10.4508	2000.36	-7.5805	1.1603e-51	2.464e-49
ENSGALG00000019147	6.32148	531.734	-6.3943	1.6237e-51	3.4184e-49
Novel02587	395.732	9584.19	-4.5981	2.4608e-51	5.1366e-49
ENSGALG00000001977	943.643	34167.4	-5.1782	3.0921e-51	6.3995e-49
Novel01064	406.623	0.796518	8.9958	5.999e-51	1.2311e-48
ENSGALG00000008424	2660.8	0.410131	12.663	9.1913e-51	1.8706e-48
Novel00662	1182.56	4.53604	8.0263	1.6345e-50	3.2989e-48
ENSGALG00000006110	2175.58	80.1588	4.7624	3.851e-50	7.709e-48
ENSGALG00000029150	1462.93	30516.6	-4.3827	4.3522e-50	8.6414e-48
ENSGALG00000007048	592.651	12227.4	-4.3668	5.0736e-50	9.9925e-48
ENSGALG00000024470	294.725	11152.1	-5.2418	6.2422e-50	1.2196e-47
ENSGALG00000030425	2.19746	762.426	-8.4386	8.3207e-50	1.6128e-47
ENSGALG00000002728	51.2434	1647.99	-5.0072	9.8604e-50	1.8961e-47
ENSGALG00000040062	646.68	14182.4	-4.4549	1.017e-49	1.9405e-47
ENSGALG00000035879	632.201	13211.8	-4.3853	1.5708e-49	2.9739e-47
ENSGALG00000026687	43.1638	1326.97	-4.9422	3.7315e-49	7.0101e-47
ENSGALG00000011252	779.943	15.9791	5.6091	7.9569e-49	1.4834e-46
ENSGALG00000015018	2231.88	45708.7	-4.3561	3.9843e-48	7.3716e-46
ENSGALG00000032619	701.322	14550.3	-4.3748	4.251e-48	7.8058e-46
ENSGALG00000006412	423.197	2.35696	7.4883	5.3559e-48	9.7614e-46
Novel01360	20.3528	2176.14	-6.7404	8.4724e-48	1.5327e-45
ENSGALG00000029364	42.2855	1287.01	-4.9277	1.327e-47	2.3829e-45
ENSGALG00000034950	1007.23	18.3152	5.7812	1.8139e-47	3.2335e-45
ENSGALG00000008969	2623.94	5.67946	8.8518	2.1579e-47	3.8188e-45
ENSGALG00000005458	5.63211	6190.2	-10.102	3.8585e-47	6.7794e-45
Novel02689	25.8516	6766.49	-8.032	8.7035e-47	1.5183e-44
ENSGALG00000036221	22.4555	782.085	-5.1222	1.012e-46	1.7529e-44
ENSGALG00000006190	2538.74	72691.6	-4.8396	1.2866e-46	2.2128e-44
ENSGALG00000031183	652.259	0.763922	9.7378	1.4472e-46	2.4715e-44
ENSGALG00000038022	1743.53	73.924	4.5598	2.4396e-46	4.1375e-44
ENSGALG00000019718	3136.54	8.01957	8.6114	2.6282e-46	4.4266e-44
ENSGALG00000031076	396.244	2.3807	7.3789	3.0268e-46	5.063e-44
ENSGALG00000011618	326.331	6133.53	-4.2323	6.1293e-46	1.0183e-43
ENSGALG00000006835	9977.6	178414	-4.1604	1.152e-45	1.9009e-43
Novel01249	94.6014	2110.77	-4.4798	1.1612e-45	1.9032e-43
ENSGALG00000014463	7360.03	135418	-4.2016	1.2637e-45	2.0574e-43
ENSGALG00000006409	809.341	13895.9	-4.1018	1.569e-45	2.5377e-43
ENSGALG00000008135	623.554	12.3531	5.6576	1.7109e-45	2.7489e-43
ENSGALG00000016680	321.082	0.353791	9.8258	2.3882e-45	3.812e-43
ENSGALG00000041461	508.986	7.62628	6.0605	2.8125e-45	4.4602e-43
ENSGALG00000039269	62.0893	1382.82	-4.4771	5.3506e-45	8.4305e-43
ENSGALG00000005537	29.4065	903.662	-4.9416	6.4692e-45	1.0128e-42
ENSGALG00000030002	1518.73	0.353791	12.068	6.7368e-45	1.0479e-42
ENSGALG00000025842	23161	399150	-4.1072	8.566e-45	1.324e-42
ENSGALG00000030349	391.909	1.23039	8.3153	8.8499e-45	1.3593e-42
Novel02865	19.9388	690.907	-5.1148	1.5414e-44	2.3527e-42
ENSGALG00000010053	5903.43	338.817	4.123	1.9214e-44	2.9146e-42
ENSGALG00000037864	227.503	134776	-9.2105	2.4903e-44	3.7543e-42
ENSGALG00000008593	201.912	7673.06	-5.248	2.7931e-44	4.1849e-42
ENSGALG00000016562	4.3086	376.265	-6.4484	1.738e-43	2.5881e-41
ENSGALG00000017168	44.0416	16278	-8.5298	1.7555e-43	2.5983e-41
ENSGALG00000042171	2.13545	308.204	-7.1732	1.9415e-43	2.8563e-41
ENSGALG00000030898	131.216	2596.6	-4.3066	2.2654e-43	3.3129e-41
ENSGALG00000027536	750.553	5.04396	7.2173	2.3854e-43	3.4677e-41
ENSGALG00000003521	9412.57	146683	-3.962	2.5157e-43	3.6354e-41
ENSGALG00000003922	6103.79	369.235	4.0471	5.0768e-43	7.2932e-41
ENSGALG00000009446	47.2248	1126.39	-4.576	5.2447e-43	7.4904e-41
ENSGALG00000016442	2959.02	164.816	4.1662	5.5264e-43	7.8469e-41
ENSGALG00000037557	828.032	13711.8	-4.0496	7.0033e-43	9.8864e-41
ENSGALG00000001475	17817.3	1179.19	3.9174	1.0376e-42	1.4564e-40
ENSGALG00000003584	3798.97	224.345	4.0818	2.8097e-42	3.9211e-40
ENSGALG00000039966	760.155	24.6519	4.9465	4.2618e-42	5.9137e-40
ENSGALG00000039101	367.417	0.353791	10.02	5.7511e-42	7.9352e-40
ENSGALG00000005754	5.04401	511.924	-6.6652	8.3482e-42	1.1454e-39
ENSGALG00000043435	11.3805	1122.58	-6.6241	9.2185e-42	1.2577e-39
ENSGALG00000002623	121.854	2069.62	-4.0861	1.2782e-41	1.7342e-39
ENSGALG00000032910	191.999	3068.95	-3.9986	1.8637e-41	2.5147e-39
ENSGALG00000043787	463.917	7070.39	-3.9298	2.1573e-41	2.8948e-39
ENSGALG00000012211	2425.33	34549.2	-3.8324	2.3732e-41	3.1671e-39
ENSGALG00000010992	261.223	0	Inf	2.4408e-41	3.2396e-39
ENSGALG00000040995	2190.41	42752.6	-4.2867	3.0895e-41	4.0784e-39
ENSGALG00000009691	1.05996	254.144	-7.9055	5.3517e-41	7.0269e-39
ENSGALG00000028047	328.665	2.50224	7.0373	6.6799e-41	8.7238e-39
ENSGALG00000037443	301.172	4583.21	-3.9277	6.8644e-41	8.9171e-39
Novel02911	481.328	10.005	5.5882	9.7172e-41	1.2556e-38
ENSGALG00000040035	26.0736	1720.84	-6.0444	1.0034e-40	1.2898e-38
ENSGALG00000035354	3.46615	312.469	-6.4942	1.0268e-40	1.3129e-38
ENSGALG00000009129	853.192	1.41516	9.2358	1.1373e-40	1.4466e-38
ENSGALG00000007484	866.452	12389.3	-3.8378	1.56e-40	1.974e-38
ENSGALG00000030124	57.4081	1227.86	-4.4187	1.7282e-40	2.1756e-38
ENSGALG00000013193	736.559	1.32818	9.1152	3.0953e-40	3.8766e-38
ENSGALG00000021271	481.616	10.1246	5.5719	3.2504e-40	4.0501e-38
ENSGALG00000018946	639.255	14145.8	-4.4678	3.4891e-40	4.3254e-38
ENSGALG00000003085	2969.33	188.103	3.9805	5.162e-40	6.367e-38
ENSGALG00000003374	2023.48	0.410131	12.268	5.3594e-40	6.5772e-38
ENSGALG00000041246	875.854	35.8733	4.6097	6.102e-40	7.4512e-38
ENSGALG00000002485	1318.24	18124.9	-3.7813	6.9868e-40	8.4709e-38
ENSGALG00000004250	2045.2	123.808	4.0461	7.0065e-40	8.4709e-38
ENSGALG00000028810	311.886	4507.31	-3.8532	1.224e-39	1.4725e-37
ENSGALG00000006755	367.805	5627.71	-3.9355	1.3474e-39	1.613e-37
ENSGALG00000017398	586.714	0	Inf	1.4118e-39	1.6819e-37
ENSGALG00000038330	202.927	3053.34	-3.9114	1.5293e-39	1.813e-37
ENSGALG00000017025	2241.41	138.973	4.0115	1.5968e-39	1.8839e-37
ENSGALG00000004249	714.589	26.3822	4.7595	2.3445e-39	2.7495e-37
ENSGALG00000017075	172.82	2702.5	-3.967	2.353e-39	2.7495e-37
ENSGALG00000006069	2430.52	34798.5	-3.8397	2.8123e-39	3.2706e-37
ENSGALG00000015140	541.476	2.40445	7.815	3.329e-39	3.8531e-37
ENSGALG00000033766	35.8854	934.155	-4.7022	3.6618e-39	4.2184e-37
ENSGALG00000042446	11.8906	456.705	-5.2634	6.8232e-39	7.8233e-37
ENSGALG00000015013	343.795	4.32753	6.3119	7.7614e-39	8.8574e-37
ENSGALG00000040212	377.789	5229.94	-3.7911	7.9005e-39	8.9742e-37
ENSGALG00000016945	1492.61	56.4785	4.724	9.3583e-39	1.0581e-36
ENSGALG00000009537	91.1055	1527.38	-4.0674	1.0251e-38	1.1484e-36
ENSGALG00000031242	37.8909	5387.51	-7.1516	1.0224e-38	1.1484e-36
ENSGALG00000041031	36.8137	794.881	-4.4324	1.0896e-38	1.2151e-36
Novel01925	1512.03	21220.8	-3.8109	1.2152e-38	1.3489e-36
ENSGALG00000012552	699.373	9157.64	-3.7108	1.4446e-38	1.5964e-36
ENSGALG00000003126	46.6751	962.584	-4.3662	2.3433e-38	2.5778e-36
ENSGALG00000033829	30.4767	714.38	-4.5509	2.3743e-38	2.6003e-36
ENSGALG00000007408	113.467	1786.29	-3.9766	2.5726e-38	2.8048e-36
ENSGALG00000034895	31.6933	1226.58	-5.2743	2.8482e-38	3.0915e-36
ENSGALG00000013999	24.3776	1335.8	-5.776	2.9616e-38	3.2004e-36
ENSGALG00000025810	2028.8	130.338	3.9603	3.4139e-38	3.6728e-36
ENSGALG00000009601	1346.47	77.1087	4.1261	8.1091e-38	8.686e-36
ENSGALG00000004195	2334.04	161.092	3.8569	1.6971e-37	1.802e-35
ENSGALG00000008420	447.151	5829.59	-3.7046	1.6906e-37	1.802e-35
ENSGALG00000003285	527.252	11.7364	5.4894	1.8529e-37	1.9589e-35
ENSGALG00000009719	435.066	5.65571	6.2654	2.033e-37	2.1401e-35
ENSGALG00000004801	1046.32	12954.5	-3.6301	2.1307e-37	2.2333e-35
ENSGALG00000035350	247.908	0.763922	8.3422	2.2491e-37	2.3473e-35
Novel01212	1678.96	3.86106	8.7644	4.1414e-37	4.3039e-35
ENSGALG00000011360	59.552	1104.45	-4.213	4.5453e-37	4.7036e-35
ENSGALG00000017229	654.166	26.9415	4.6018	5.1756e-37	5.3333e-35
ENSGALG00000012715	544.873	7294.84	-3.7429	5.7257e-37	5.8754e-35
ENSGALG00000002988	3246.08	21.0279	7.2703	6.2713e-37	6.4083e-35
ENSGALG00000004320	1642.81	5.20413	8.3023	6.6609e-37	6.7781e-35
ENSGALG00000006775	812.46	10540.3	-3.6975	7.08e-37	7.1746e-35
ENSGALG00000008604	173.866	2517.6	-3.856	8.4888e-37	8.5667e-35
ENSGALG00000008912	55.9581	979.117	-4.1291	9.6378e-37	9.6862e-35
ENSGALG00000029845	656.426	9166.56	-3.8037	1.0055e-36	1.0064e-34
ENSGALG00000015410	311.539	4306.63	-3.7891	1.0254e-36	1.0221e-34
Novel02968	11.9385	413.013	-5.1125	1.1627e-36	1.1543e-34
ENSGALG00000040012	27.6713	6173.37	-7.8015	1.2963e-36	1.2817e-34
ENSGALG00000029719	0.928182	217.429	-7.8719	1.4504e-36	1.4283e-34
ENSGALG00000001992	9551.53	112450	-3.5574	1.5249e-36	1.4956e-34
ENSGALG00000016375	659.581	26.0256	4.6635	1.6387e-36	1.6008e-34
ENSGALG00000038874	832.736	41.6585	4.3212	1.8865e-36	1.8355e-34
ENSGALG00000001678	389.742	4987.21	-3.6776	1.9406e-36	1.8807e-34
ENSGALG00000008233	1366.32	84.6659	4.0124	2.0601e-36	1.9886e-34
ENSGALG00000003925	117.478	6733.8	-5.841	2.4863e-36	2.3905e-34
ENSGALG00000036212	33.7384	722.896	-4.4213	3.2308e-36	3.0942e-34
ENSGALG00000008185	139.481	1922.88	-3.7851	3.7575e-36	3.5846e-34
Novel01024	1269.23	0	Inf	4.5173e-36	4.2926e-34
ENSGALG00000014442	41351.7	480082	-3.5373	4.746e-36	4.4925e-34
ENSGALG00000041054	536.321	19.5061	4.7811	4.7927e-36	4.5192e-34
ENSGALG00000031454	69.0401	1160.1	-4.0707	5.591e-36	5.2516e-34
ENSGALG00000009730	75.6083	1202.12	-3.9909	6.0371e-36	5.6435e-34
ENSGALG00000027872	258.6	4522.65	-4.1284	6.0543e-36	5.6435e-34
Novel02798	948.566	11488.4	-3.5983	9.9988e-36	9.2848e-34
ENSGALG00000031970	66.6106	1101.53	-4.0476	1.7123e-35	1.584e-33
Novel00194	370.919	0.353791	10.034	2.1444e-35	1.9763e-33
Novel02136	749.8	38.4418	4.2858	2.6734e-35	2.4545e-33
ENSGALG00000009545	833.514	9341	-3.4863	3.2369e-35	2.9607e-33
ENSGALG00000009870	55.3689	2163.77	-5.2883	3.8759e-35	3.532e-33
ENSGALG00000027514	246.894	1.41516	7.4468	3.9448e-35	3.5814e-33
ENSGALG00000010826	197.706	3176.46	-4.006	6.4723e-35	5.8543e-33
ENSGALG00000011715	3370.69	46524.6	-3.7869	7.2469e-35	6.5308e-33
Novel02589	29.3819	858.501	-4.8688	9.1651e-35	8.229e-33
ENSGALG00000015691	2926.19	241.691	3.5978	2.7477e-34	2.4505e-32
ENSGALG00000028210	61.0723	1030.34	-4.0765	2.7493e-34	2.4505e-32
ENSGALG00000034083	485.472	6807.77	-3.8097	2.8311e-34	2.5142e-32
ENSGALG00000014835	32.3733	877.033	-4.7598	5.1976e-34	4.5991e-32
ENSGALG00000003690	8028.47	55.0558	7.1881	5.5999e-34	4.9372e-32
ENSGALG00000001926	2648.62	28965.7	-3.451	5.802e-34	5.097e-32
ENSGALG00000016301	70.0848	1115.21	-3.9921	9.6283e-34	8.4281e-32
ENSGALG00000037603	308.135	3568.16	-3.5335	9.6727e-34	8.4366e-32
ENSGALG00000008733	302.918	5.17843	5.8703	9.9279e-34	8.6284e-32
ENSGALG00000015453	151.218	2022.6	-3.7415	1.3785e-33	1.1938e-31
ENSGALG00000004721	12.735	377.645	-4.8902	1.52e-33	1.3117e-31
ENSGALG00000004794	1428.31	106.382	3.747	1.618e-33	1.3913e-31
ENSGALG00000007690	585.046	1.15031	8.9904	2.035e-33	1.7439e-31
ENSGALG00000015779	118.671	1533.07	-3.6914	2.0546e-33	1.7544e-31
ENSGALG00000031744	810.532	35893.7	-5.4687	2.4079e-33	2.049e-31
ENSGALG00000002908	495.724	20.3835	4.6041	2.4297e-33	2.0603e-31
ENSGALG00000016164	34.8179	629.535	-4.1764	3.47e-33	2.9324e-31
ENSGALG00000010745	5603.63	523.866	3.4191	3.7006e-33	3.1164e-31
ENSGALG00000036892	1527.82	119.128	3.6809	4.7748e-33	4.0072e-31
ENSGALG00000035636	600.805	6430.06	-3.4199	6.9385e-33	5.8032e-31
ENSGALG00000007609	1500.79	116.577	3.6864	7.192e-33	5.9946e-31
ENSGALG00000031860	81.9432	1159.78	-3.8231	1.3393e-32	1.1125e-30
ENSGALG00000016105	1666.41	17066.3	-3.3563	1.3571e-32	1.1235e-30
ENSGALG00000010098	1885.37	161.984	3.5409	1.3896e-32	1.1465e-30
ENSGALG00000015142	356.493	10.4674	5.0899	1.6258e-32	1.3368e-30
ENSGALG00000016309	474.21	10305.6	-4.4418	1.7567e-32	1.4397e-30
ENSGALG00000003213	11.1504	334.999	-4.909	1.8789e-32	1.5346e-30
ENSGALG00000037165	12.1418	356.071	-4.8741	2.1339e-32	1.7371e-30
Novel01818	128.869	2316.39	-4.1679	2.1484e-32	1.7432e-30
ENSGALG00000014585	82.5744	1114.65	-3.7547	2.2191e-32	1.7946e-30
ENSGALG00000007646	781.989	8066.07	-3.3666	2.3801e-32	1.9184e-30
Novel02864	11.7351	5114.67	-8.7677	2.974e-32	2.3892e-30
Novel00726	1044.16	73.6627	3.8253	3.3207e-32	2.659e-30
ENSGALG00000007936	3785.19	36542	-3.2711	3.6797e-32	2.9368e-30
ENSGALG00000043555	1095.94	79.1635	3.7912	4.2361e-32	3.3699e-30
ENSGALG00000010961	2182.45	195.774	3.4787	4.9543e-32	3.9284e-30
Novel02637	27.7032	544.475	-4.2967	5.7794e-32	4.5678e-30
ENSGALG00000038362	1048.84	75.7322	3.7917	5.8257e-32	4.5895e-30
ENSGALG00000034876	643.513	6375.7	-3.3085	6.9716e-32	5.4746e-30
ENSGALG00000015345	199.365	0.763922	8.0278	7.2475e-32	5.673e-30
ENSGALG00000030879	356.287	3704.31	-3.3781	7.5091e-32	5.859e-30
ENSGALG00000041548	3485.03	339.038	3.3617	7.6379e-32	5.9406e-30
ENSGALG00000039522	15.5061	683.383	-5.4618	7.8138e-32	6.058e-30
Novel02362	2.69205	215.634	-6.3237	8.8097e-32	6.8086e-30
ENSGALG00000013762	333.865	0	Inf	9.8919e-32	7.6208e-30
Novel01460	0	148.319	#NAME?	1.1218e-31	8.6155e-30
ENSGALG00000005019	39.2333	1392.04	-5.149	1.4885e-31	1.1395e-29
ENSGALG00000008367	7310.66	96.1814	6.2481	1.6271e-31	1.2418e-29
ENSGALG00000032779	3181.31	202.78	3.9716	1.635e-31	1.2439e-29
ENSGALG00000002781	1207.04	94.5218	3.6747	1.7955e-31	1.3618e-29
ENSGALG00000016582	1006.4	73.6433	3.7725	1.8688e-31	1.413e-29
Novel02884	308.824	1.91423	7.3339	2.0914e-31	1.5764e-29
ENSGALG00000007038	482.061	12.3422	5.2875	2.4512e-31	1.842e-29
ENSGALG00000042771	428.654	4314.56	-3.3313	3.276e-31	2.4542e-29
ENSGALG00000006503	872.757	8764.28	-3.328	3.5797e-31	2.6735e-29
ENSGALG00000036360	183.472	0.442728	8.6949	3.9491e-31	2.9404e-29
ENSGALG00000035030	1893.55	170.475	3.4735	4.2069e-31	3.1228e-29
ENSGALG00000038631	767.685	0.820262	9.8702	5.1018e-31	3.7756e-29
ENSGALG00000009971	1499.57	132.064	3.5052	6.1029e-31	4.5029e-29
ENSGALG00000010386	494.86	25.2704	4.2915	6.2195e-31	4.5751e-29
Novel01517	39.8939	1146.48	-4.8449	6.8961e-31	5.0576e-29
Novel00868	2.83202	201.588	-6.1534	8.4063e-31	6.1466e-29
ENSGALG00000008204	103.753	1252.69	-3.5938	8.8321e-31	6.4388e-29
Novel00526	205.249	1.59304	7.0095	9.0087e-31	6.5479e-29
ENSGALG00000002993	254.294	4.56864	5.7986	1.0452e-30	7.5746e-29
ENSGALG00000041611	35.4849	561.274	-3.9834	1.0642e-30	7.6893e-29
ENSGALG00000015708	2131.8	109.604	4.2817	1.1477e-30	8.2683e-29
ENSGALG00000039609	20.2714	422.998	-4.3831	1.1951e-30	8.5845e-29
ENSGALG00000027632	214.589	2255.5	-3.3938	1.2564e-30	8.9981e-29
ENSGALG00000008795	119.3	1707.44	-3.8392	1.8245e-30	1.3028e-28
ENSGALG00000002192	171.679	1787.18	-3.3799	2.0714e-30	1.4749e-28
ENSGALG00000001184	709.675	6679.24	-3.2345	2.5602e-30	1.8176e-28
ENSGALG00000036346	68.2003	1001.63	-3.8764	2.8224e-30	1.9979e-28
ENSGALG00000036484	383.077	0.852859	8.8111	3.3926e-30	2.3946e-28
ENSGALG00000042360	1231.19	0.353791	11.765	5.8547e-30	4.1205e-28
ENSGALG00000031372	17.6142	399.726	-4.5042	6.1745e-30	4.3331e-28
ENSGALG00000041344	1192.3	10978.2	-3.2028	6.7508e-30	4.724e-28
ENSGALG00000028115	2998.43	1.26299	11.213	7.3266e-30	5.1123e-28
ENSGALG00000004161	2045.18	198.767	3.3631	8.6104e-30	5.9909e-28
Novel03067	224.623	3.14462	6.1585	8.9402e-30	6.2027e-28
ENSGALG00000017316	35.2262	7624.26	-7.7578	9.4235e-30	6.5196e-28
ENSGALG00000039320	41.7508	1034.83	-4.6314	9.5483e-30	6.5873e-28
ENSGALG00000021272	58.5074	773.689	-3.7251	1.1598e-29	7.979e-28
ENSGALG00000010357	323.513	4427.56	-3.7746	1.1941e-29	8.1918e-28
ENSGALG00000021869	306.951	2931.54	-3.2556	1.4502e-29	9.9206e-28
ENSGALG00000003800	467.738	4324.89	-3.2089	1.4689e-29	1.002e-27
ENSGALG00000035369	373.441	3588.81	-3.2646	1.5205e-29	1.0344e-27
ENSGALG00000011355	350.587	0.885455	8.6291	1.7525e-29	1.1888e-27
ENSGALG00000041323	673.367	45.0384	3.9022	2.0941e-29	1.4167e-27
ENSGALG00000019761	96.6054	5374.38	-5.7978	2.2989e-29	1.5509e-27
ENSGALG00000043112	4.13956	212.353	-5.6808	2.3486e-29	1.5801e-27
Novel02094	677.778	44.6509	3.9241	2.444e-29	1.6398e-27
ENSGALG00000011967	1213	106.516	3.5094	2.562e-29	1.7142e-27
ENSGALG00000013208	1064.74	90.4414	3.5574	2.6143e-29	1.74e-27
ENSGALG00000016979	240.425	2632.23	-3.4526	2.6147e-29	1.74e-27
ENSGALG00000006229	18.1754	373.506	-4.3611	2.7075e-29	1.7968e-27
ENSGALG00000031996	239.426	2425.82	-3.3408	2.784e-29	1.8426e-27
ENSGALG00000033902	23.5441	432.425	-4.199	2.8299e-29	1.8679e-27
ENSGALG00000012546	2669.74	273.844	3.2853	2.8878e-29	1.901e-27
ENSGALG00000003362	521.334	4822.17	-3.2094	3.5585e-29	2.3362e-27
ENSGALG00000021180	8.65791	268.927	-4.9571	3.6557e-29	2.3935e-27
ENSGALG00000038984	335.834	12.5962	4.7367	3.7065e-29	2.4203e-27
ENSGALG00000007606	7016.56	60213.6	-3.1013	4.2778e-29	2.786e-27
ENSGALG00000027166	5.4156	372.176	-6.1027	4.963e-29	3.2236e-27
ENSGALG00000029017	29.0143	480.659	-4.0502	4.9842e-29	3.2287e-27
ENSGALG00000007768	758.951	56.9091	3.7373	5.0154e-29	3.2403e-27
ENSGALG00000035211	370.054	3498.86	-3.2411	5.1544e-29	3.3214e-27
ENSGALG00000016127	549.742	6814.52	-3.6318	6.3907e-29	4.1072e-27
Novel00650	2225.5	238.33	3.2231	6.7378e-29	4.3189e-27
ENSGALG00000008095	1378.82	129.311	3.4145	6.9996e-29	4.4749e-27
ENSGALG00000026971	340.365	3161.12	-3.2153	7.7968e-29	4.9716e-27
ENSGALG00000029827	0.997955	155.565	-7.2843	8.2017e-29	5.2162e-27
ENSGALG00000000141	173.962	5775.73	-5.0532	9.5385e-29	6.0507e-27
ENSGALG00000040582	170.613	0.820262	7.7004	1.4486e-28	9.1652e-27
Novel02883	113.524	1227.27	-3.4344	1.4559e-28	9.1876e-27
ENSGALG00000014801	934.211	80.0045	3.5456	1.8591e-28	1.1702e-26
ENSGALG00000008980	192.564	2.1247	6.5019	2.0522e-28	1.2884e-26
ENSGALG00000001449	270.717	5.26737	5.6836	2.178e-28	1.3638e-26
ENSGALG00000023195	263.081	0	Inf	2.4138e-28	1.5076e-26
ENSGALG00000011541	3532.09	30542.9	-3.1122	3.1076e-28	1.9361e-26
ENSGALG00000042836	56.7009	731.409	-3.6892	3.1562e-28	1.9613e-26
ENSGALG00000014897	999.328	82.993	3.5899	3.2407e-28	2.0088e-26
ENSGALG00000004897	535.939	35.1994	3.9284	3.636e-28	2.2481e-26
ENSGALG00000000059	541.921	5.62312	6.5906	3.7031e-28	2.2838e-26
ENSGALG00000014753	594.15	40.8423	3.8627	4.083e-28	2.5117e-26
ENSGALG00000003314	682.497	5889.87	-3.1093	4.4532e-28	2.7326e-26
ENSGALG00000016692	587.682	41.2169	3.8337	4.5696e-28	2.797e-26
ENSGALG00000001633	243.974	2306.55	-3.2409	4.7394e-28	2.8937e-26
ENSGALG00000009207	128.667	1327.71	-3.3672	4.8405e-28	2.948e-26
ENSGALG00000016342	2425.76	40480.9	-4.0607	5.0324e-28	3.0572e-26
ENSGALG00000014505	270.479	0.353791	9.5784	8.3152e-28	5.039e-26
ENSGALG00000010628	625.696	5764.33	-3.2036	8.6216e-28	5.2118e-26
ENSGALG00000010005	1357.72	11267.7	-3.0529	8.9097e-28	5.3727e-26
ENSGALG00000014453	75.1194	887.332	-3.5622	9.6806e-28	5.8231e-26
ENSGALG00000016676	2509.43	279.147	3.1683	1.0298e-27	6.1795e-26
ENSGALG00000035856	79.7754	864.364	-3.4376	1.0893e-27	6.5201e-26
ENSGALG00000007210	242.205	2173.64	-3.1658	1.3886e-27	8.2912e-26
ENSGALG00000011994	536.417	4711.47	-3.1347	1.4262e-27	8.4956e-26
ENSGALG00000006292	264.375	2348.47	-3.1511	1.4493e-27	8.6116e-26
ENSGALG00000036645	970.952	88.0221	3.4635	1.7273e-27	1.0239e-25
ENSGALG00000029585	1108.94	9074.02	-3.0326	1.7939e-27	1.0608e-25
ENSGALG00000008040	68.5088	831.92	-3.6021	1.8031e-27	1.0637e-25
ENSGALG00000037192	2.47597	171.003	-6.1099	1.8157e-27	1.0685e-25
ENSGALG00000032404	704.04	54346.3	-6.2704	2.0401e-27	1.1977e-25
ENSGALG00000009530	432.186	24.8041	4.123	2.1398e-27	1.2532e-25
ENSGALG00000012199	600.692	45.5906	3.7198	2.3241e-27	1.3578e-25
ENSGALG00000001101	2482.94	284.841	3.1238	2.3621e-27	1.3768e-25
ENSGALG00000035315	237.649	2156.37	-3.1817	2.4514e-27	1.4254e-25
ENSGALG00000014869	1207.76	9801.63	-3.0207	2.6801e-27	1.5547e-25
ENSGALG00000022557	460.018	3.95	6.8637	2.693e-27	1.5585e-25
Novel00437	390.969	21.7245	4.1697	2.8762e-27	1.6606e-25
ENSGALG00000039447	141.2	0	Inf	3.259e-27	1.8772e-25
ENSGALG00000029383	1444.61	11674.2	-3.0146	3.2674e-27	1.8776e-25
ENSGALG00000003778	1656.68	14122.2	-3.0916	3.3036e-27	1.8939e-25
ENSGALG00000031902	247.387	2674.78	-3.4346	3.5404e-27	2.0249e-25
ENSGALG00000043223	839.534	32.9333	4.672	3.714e-27	2.1192e-25
ENSGALG00000003438	990.809	82.6015	3.5844	3.7961e-27	2.161e-25
ENSGALG00000006037	2935.65	344.768	3.09	4.1381e-27	2.3503e-25
ENSGALG00000043448	135.156	1349.75	-3.32	4.6496e-27	2.6346e-25
ENSGALG00000037593	506.862	4224.39	-3.0591	5.1693e-27	2.9224e-25
ENSGALG00000030212	59.0107	2203.23	-5.2225	5.2438e-27	2.9576e-25
ENSGALG00000042351	75.1752	1691.35	-4.4918	5.3308e-27	2.9997e-25
Novel01711	1055.57	100.786	3.3887	5.3965e-27	3.0297e-25
ENSGALG00000008486	484.482	4228.23	-3.1255	6.3419e-27	3.5523e-25
ENSGALG00000005451	1255.32	127.493	3.2996	6.4493e-27	3.6042e-25
ENSGALG00000035465	879.392	80.2722	3.4535	6.9168e-27	3.8567e-25
ENSGALG00000036713	883.611	6943.95	-2.9743	7.2101e-27	4.011e-25
ENSGALG00000009453	737.679	5982.44	-3.0197	8.1174e-27	4.5055e-25
ENSGALG00000005360	6.83319	676.032	-6.6284	9.0008e-27	4.9845e-25
ENSGALG00000036856	2453.49	288.12	3.0901	9.7116e-27	5.366e-25
ENSGALG00000003802	62.5889	729.875	-3.5437	1.1458e-26	6.3165e-25
ENSGALG00000015511	873.417	79.3454	3.4605	1.3235e-26	7.2799e-25
ENSGALG00000032398	3099.13	371.308	3.0612	1.3933e-26	7.6468e-25
Novel00689	25.9559	936.082	-5.1725	1.4426e-26	7.8991e-25
Novel01471	0	123.417	#NAME?	1.6097e-26	8.7948e-25
ENSGALG00000010120	733.568	64.481	3.508	1.684e-26	9.1802e-25
ENSGALG00000008439	421.043	3398.62	-3.0129	1.7921e-26	9.7476e-25
ENSGALG00000011306	6991.86	74186	-3.4074	1.8091e-26	9.8183e-25
ENSGALG00000043641	1864	13891.3	-2.8977	1.9766e-26	1.0703e-24
ENSGALG00000038411	425.134	26.7725	3.9891	2.0361e-26	1.1001e-24
ENSGALG00000043597	316.076	14.543	4.4419	2.0982e-26	1.1312e-24
Novel01706	239.455	2050.48	-3.0981	2.4165e-26	1.2999e-24
ENSGALG00000010551	307.24	2554.49	-3.0556	3.0354e-26	1.6293e-24
ENSGALG00000028283	0.533863	127.13	-7.8956	3.4266e-26	1.8352e-24
ENSGALG00000002431	519.274	3993.15	-2.943	3.7287e-26	1.9926e-24
ENSGALG00000005147	842.282	6564.16	-2.9622	3.7738e-26	2.0123e-24
ENSGALG00000008823	20.6411	380.086	-4.2027	4.0739e-26	2.1676e-24
ENSGALG00000011376	56.5666	821.877	-3.8609	4.6014e-26	2.443e-24
ENSGALG00000015435	1571.39	12208.6	-2.9578	5.1317e-26	2.7186e-24
ENSGALG00000013738	701.74	9281.96	-3.7254	5.1876e-26	2.7422e-24
ENSGALG00000005961	1266.52	137.093	3.2077	5.2832e-26	2.7867e-24
ENSGALG00000005779	58.2091	650.476	-3.4822	5.3158e-26	2.7979e-24
ENSGALG00000010674	948.754	94.189	3.3324	5.7898e-26	3.0408e-24
ENSGALG00000003862	339.546	2870.13	-3.0794	6.1266e-26	3.2108e-24
ENSGALG00000010960	374.623	21.8868	4.0973	6.5886e-26	3.4382e-24
ENSGALG00000039026	383.28	3275.35	-3.0952	6.5876e-26	3.4382e-24
ENSGALG00000034322	32.8079	437.504	-3.7372	7.2685e-26	3.7849e-24
ENSGALG00000007945	617.347	6395.13	-3.3728	7.4623e-26	3.8693e-24
ENSGALG00000033063	529.161	40.1259	3.7211	7.4555e-26	3.8693e-24
Novel01153	129.733	1205.22	-3.2157	7.9054e-26	4.0904e-24
ENSGALG00000003226	2794.98	26541.8	-3.2474	8.1562e-26	4.2112e-24
ENSGALG00000028536	351.4	2906.36	-3.048	8.4344e-26	4.3457e-24
ENSGALG00000041403	474.905	3669.28	-2.9498	8.7753e-26	4.5118e-24
ENSGALG00000016438	385.195	23.1092	4.0591	8.9209e-26	4.577e-24
ENSGALG00000036519	522.499	41.1496	3.6665	8.9983e-26	4.607e-24
ENSGALG00000033405	4965.54	648.096	2.9377	9.2051e-26	4.7031e-24
ENSGALG00000001021	105.669	1051.06	-3.3142	9.6529e-26	4.9216e-24
ENSGALG00000040156	716.617	5500.41	-2.9403	1.3642e-25	6.9408e-24
ENSGALG00000000632	434.879	29.6918	3.8725	1.4699e-25	7.4634e-24
ENSGALG00000004230	193.038	2.17909	6.469	1.553e-25	7.8687e-24
ENSGALG00000015360	802.171	73.7755	3.4427	1.7419e-25	8.8078e-24
ENSGALG00000004503	394.289	3098.59	-2.9743	1.837e-25	9.2691e-24
ENSGALG00000038194	975.839	100.58	3.2783	1.8735e-25	9.434e-24
ENSGALG00000041775	13.3686	282.246	-4.4	1.978e-25	9.9395e-24
ENSGALG00000035804	496.99	8779.19	-4.1428	2.1247e-25	1.0655e-23
ENSGALG00000038495	473.727	16.47	4.8461	2.2627e-25	1.1324e-23
ENSGALG00000033231	835.114	82.6203	3.3374	2.35e-25	1.1737e-23
ENSGALG00000040901	5.3395	192.563	-5.1725	2.5484e-25	1.2701e-23
ENSGALG00000006258	172.17	2.46964	6.1234	2.8992e-25	1.442e-23
ENSGALG00000014891	133.548	1175.6	-3.138	3.4652e-25	1.72e-23
ENSGALG00000033118	822.575	34.6636	4.5687	3.5811e-25	1.774e-23
ENSGALG00000013420	750.043	71.4312	3.3923	3.6717e-25	1.8152e-23
Novel02204	600.572	7.4959	6.3241	3.7776e-25	1.8638e-23
ENSGALG00000033516	915.695	70.9431	3.6901	4.0536e-25	1.9959e-23
Novel03083	1171.06	127.008	3.2048	4.339e-25	2.1322e-23
ENSGALG00000002160	831.54	37377.9	-5.4903	4.4598e-25	2.1871e-23
Novel01550	123.845	1313.19	-3.4065	4.8588e-25	2.378e-23
ENSGALG00000016830	242.886	1978.61	-3.0261	4.9712e-25	2.4281e-23
ENSGALG00000026081	1395.01	16368.9	-3.5526	5.0701e-25	2.4715e-23
Novel00949	480.867	3594.4	-2.902	5.1535e-25	2.5072e-23
ENSGALG00000005284	128.141	1145.45	-3.1601	5.4411e-25	2.6418e-23
ENSGALG00000010255	4151.9	562.434	2.884	5.5666e-25	2.6974e-23
ENSGALG00000030064	237.827	2856.52	-3.5863	5.6214e-25	2.7186e-23
Novel00629	881.983	15232.5	-4.1103	5.8121e-25	2.8052e-23
ENSGALG00000026080	449.369	1.06137	8.7258	5.9572e-25	2.8696e-23
ENSGALG00000004004	1046.96	7821.51	-2.9012	6.0109e-25	2.8897e-23
ENSGALG00000011278	331.483	2584.03	-2.9626	6.1491e-25	2.9504e-23
ENSGALG00000031552	895.341	12291.9	-3.7791	6.3926e-25	3.0612e-23
ENSGALG00000029746	56.6473	674.836	-3.5745	6.7439e-25	3.2231e-23
ENSGALG00000008606	2095.59	15043.9	-2.8437	6.8736e-25	3.2736e-23
ENSGALG00000036637	497.492	3775.91	-2.9241	6.8765e-25	3.2736e-23
ENSGALG00000032893	953.545	6877.17	-2.8504	7.3875e-25	3.5101e-23
ENSGALG00000001096	1577.57	11213.3	-2.8294	7.6127e-25	3.6101e-23
ENSGALG00000042009	670.498	64.1609	3.3855	8.1277e-25	3.8468e-23
ENSGALG00000016034	754.913	5532.98	-2.8737	8.1499e-25	3.8498e-23
ENSGALG00000007171	9.08431	220.855	-4.6036	8.2913e-25	3.9091e-23
ENSGALG00000007191	1770.65	219.6	3.0113	8.622e-25	4.0572e-23
ENSGALG00000039118	531.444	44.8299	3.5674	9.6815e-25	4.5469e-23
ENSGALG00000011811	2161.5	15109.6	-2.8054	1.0285e-24	4.8212e-23
ENSGALG00000038672	1420.92	9934.52	-2.8056	1.0787e-24	5.0469e-23
ENSGALG00000010195	714.321	71.1794	3.327	1.0998e-24	5.1357e-23
ENSGALG00000023338	434.163	32.7771	3.7275	1.3431e-24	6.2599e-23
ENSGALG00000008538	712.26	68.632	3.3755	1.3698e-24	6.372e-23
ENSGALG00000015094	2.65378	177.451	-6.0632	1.3836e-24	6.4239e-23
ENSGALG00000025819	1645.34	11580.9	-2.8153	1.6089e-24	7.4558e-23
ENSGALG00000002726	1811.97	13122.5	-2.8564	2.1211e-24	9.8108e-23
ENSGALG00000005038	500.424	42.0834	3.5718	2.5183e-24	1.1626e-22
ENSGALG00000027742	21.2225	911.74	-5.425	2.5713e-24	1.1848e-22
ENSGALG00000001616	828.7	87.4311	3.2446	2.7564e-24	1.2677e-22
ENSGALG00000043198	1456.51	10754.9	-2.8844	3.0777e-24	1.4128e-22
ENSGALG00000007193	159.284	1342.9	-3.0757	3.8811e-24	1.7783e-22
ENSGALG00000016791	49.3748	559.896	-3.5033	4.7021e-24	2.1505e-22
ENSGALG00000031553	585.441	54.1351	3.4349	5.5542e-24	2.5354e-22
ENSGALG00000036759	625.135	45.1094	3.7927	5.6775e-24	2.5868e-22
ENSGALG00000021443	1110.11	74.1401	3.9043	5.811e-24	2.6428e-22
ENSGALG00000016931	437.821	33.975	3.6878	5.8301e-24	2.6465e-22
ENSGALG00000043355	1100.98	128.667	3.0971	6.0361e-24	2.7349e-22
ENSGALG00000037332	578.832	4133.96	-2.8363	6.2819e-24	2.841e-22
ENSGALG00000017276	120.644	0	Inf	6.5215e-24	2.944e-22
ENSGALG00000004662	175.615	1380.12	-2.9743	6.6493e-24	2.9961e-22
ENSGALG00000021128	3500.44	494.668	2.823	6.702e-24	3.0143e-22
ENSGALG00000030834	129.116	0.353791	8.5115	6.8049e-24	3.055e-22
ENSGALG00000015301	179.309	1452.97	-3.0185	7.1423e-24	3.2005e-22
ENSGALG00000009596	26.6235	368.169	-3.7896	7.5439e-24	3.3743e-22
ENSGALG00000002329	3.50442	193.193	-5.7847	7.8548e-24	3.502e-22
ENSGALG00000010010	81.6365	754.116	-3.2075	7.8581e-24	3.502e-22
Novel00671	463.605	37.2084	3.6392	8.7308e-24	3.8839e-22
ENSGALG00000013167	2257.12	15256.5	-2.7569	9.7203e-24	4.3162e-22
ENSGALG00000016955	323.971	2365.37	-2.8681	1.0272e-23	4.553e-22
Novel00580	5599.63	814.01	2.7822	1.0378e-23	4.5916e-22
ENSGALG00000028620	135.09	0.707582	7.5768	1.182e-23	5.2201e-22
ENSGALG00000003881	473.736	40.4627	3.5494	1.3989e-23	6.1669e-22
ENSGALG00000016497	437.986	3134.24	-2.8392	1.5356e-23	6.7574e-22
ENSGALG00000014447	257.178	1927.5	-2.9059	1.6036e-23	7.0435e-22
ENSGALG00000002371	242.586	1894.43	-2.9652	2.0401e-23	8.945e-22
Novel00641	254.862	2456.04	-3.2685	2.046e-23	8.9548e-22
ENSGALG00000004260	1201.93	0.885455	10.407	2.0653e-23	9.0069e-22
ENSGALG00000039384	524.112	48.1267	3.445	2.0653e-23	9.0069e-22
ENSGALG00000007511	142.152	1129.51	-2.9902	2.1366e-23	9.2761e-22
ENSGALG00000014526	5481.43	36033.7	-2.7167	2.1337e-23	9.2761e-22
ENSGALG00000035393	6.2192	336.763	-5.7589	2.1384e-23	9.2761e-22
ENSGALG00000005005	121.812	1020.99	-3.0672	2.1787e-23	9.434e-22
ENSGALG00000038936	1189.78	8769.04	-2.8817	2.2685e-23	9.8055e-22
Novel00905	202.339	6.5867	4.9411	2.3083e-23	9.9599e-22
ENSGALG00000038629	316.159	2.46964	7.0002	2.3127e-23	9.9615e-22
ENSGALG00000005017	2.63105	1029.26	-8.6117	2.751e-23	1.1828e-21
ENSGALG00000040276	211.114	7.48101	4.8186	2.8366e-23	1.2175e-21
ENSGALG00000042801	279.699	8.93072	4.969	3.2668e-23	1.3997e-21
ENSGALG00000009690	1155.18	110.903	3.3807	3.5866e-23	1.534e-21
ENSGALG00000009875	168.752	3.44207	5.6155	3.636e-23	1.5524e-21
ENSGALG00000019003	749.818	81.3126	3.205	3.7038e-23	1.5786e-21
ENSGALG00000037625	6720.05	110.068	5.932	4.2381e-23	1.8032e-21
ENSGALG00000032013	233.656	1754.49	-2.9086	4.8847e-23	2.0747e-21
ENSGALG00000037687	130.773	0.763922	7.4194	4.9714e-23	2.1079e-21
ENSGALG00000030526	331.522	22.6982	3.8685	6.4066e-23	2.7117e-21
ENSGALG00000011248	239.177	2197.12	-3.1995	6.725e-23	2.8415e-21
ENSGALG00000025881	33.8195	402.627	-3.5735	6.7906e-23	2.8614e-21
ENSGALG00000032736	627.737	5006.1	-2.9955	6.7955e-23	2.8614e-21
ENSGALG00000014513	620.157	62.6876	3.3064	6.8749e-23	2.8898e-21
ENSGALG00000007668	476.612	42.6804	3.4812	6.9445e-23	2.9141e-21
ENSGALG00000023464	434.773	37.1087	3.5504	7.2481e-23	3.0362e-21
ENSGALG00000008006	79.7407	702.341	-3.1388	7.368e-23	3.0812e-21
ENSGALG00000004956	3918.78	25586.9	-2.7069	7.4177e-23	3.0966e-21
ENSGALG00000041923	1286.83	164.707	2.9658	8.5638e-23	3.569e-21
ENSGALG00000042308	473.863	43.3811	3.4493	8.8634e-23	3.6876e-21
ENSGALG00000008609	9664.24	1516.16	2.6722	9.0075e-23	3.7412e-21
ENSGALG00000006246	668.644	4428.81	-2.7276	9.297e-23	3.8549e-21
ENSGALG00000014425	737.145	81.1964	3.1825	9.3953e-23	3.889e-21
ENSGALG00000032777	1332.23	8727.4	-2.7117	9.4401e-23	3.9009e-21
ENSGALG00000003852	365.224	8.07395	5.4994	1.0074e-22	4.156e-21
ENSGALG00000003709	75.314	677.793	-3.1699	1.1079e-22	4.5629e-21
ENSGALG00000032957	199.757	3463.92	-4.1161	1.1361e-22	4.6709e-21
ENSGALG00000039287	43.3212	460.656	-3.4105	1.2217e-22	5.0146e-21
ENSGALG00000027330	695.732	4550.36	-2.7094	1.2726e-22	5.2146e-21
ENSGALG00000000107	306.473	5124.81	-4.0637	1.6496e-22	6.7483e-21
ENSGALG00000025921	15.7847	255.471	-4.0166	1.6783e-22	6.8543e-21
ENSGALG00000002845	55.8048	1032.68	-4.2099	1.8342e-22	7.4784e-21
ENSGALG00000010748	319.372	21.9025	3.8661	1.84e-22	7.4893e-21
ENSGALG00000033087	0.526095	104.845	-7.6387	1.9643e-22	7.9822e-21
ENSGALG00000016456	101.812	820.488	-3.0106	2.1369e-22	8.669e-21
ENSGALG00000010211	506.961	3331.04	-2.716	2.2992e-22	9.312e-21
Novel01155	134.166	1079.71	-3.0086	2.3322e-22	9.4298e-21
ENSGALG00000026661	526.411	3435.2	-2.7061	2.4071e-22	9.7168e-21
ENSGALG00000008858	2761.1	17394.7	-2.6553	2.4129e-22	9.7242e-21
ENSGALG00000030372	70.2609	662.588	-3.2373	2.438e-22	9.8091e-21
Novel00746	219.931	1804.24	-3.0363	2.596e-22	1.0428e-20
ENSGALG00000008953	406.553	2685.48	-2.7237	2.6345e-22	1.0547e-20
Novel01195	136.376	1.64052	6.3773	2.6321e-22	1.0547e-20
ENSGALG00000041808	95.0983	791.648	-3.0574	2.6885e-22	1.0746e-20
ENSGALG00000039574	305.107	2118.14	-2.7954	2.7859e-22	1.1117e-20
ENSGALG00000005088	297.823	2038.98	-2.7753	3.3647e-22	1.3405e-20
ENSGALG00000010490	195.449	7.19845	4.763	3.4194e-22	1.3601e-20
ENSGALG00000016993	954.356	6216.49	-2.7035	3.6304e-22	1.4417e-20
ENSGALG00000042264	813.13	96.3689	3.0768	4.1351e-22	1.6394e-20
ENSGALG00000009157	454.345	41.9877	3.4358	4.2685e-22	1.6895e-20
ENSGALG00000005087	115.67	0.442728	8.0294	4.4827e-22	1.7658e-20
ENSGALG00000014687	628.861	5.14975	6.9321	4.4744e-22	1.7658e-20
Novel02114	254.281	13.9965	4.1833	4.4765e-22	1.7658e-20
ENSGALG00000008393	1345.09	185.555	2.8578	4.5566e-22	1.7919e-20
ENSGALG00000041478	1164.46	7556.32	-2.698	5.209e-22	2.0452e-20
ENSGALG00000011281	384.554	32.5232	3.5636	5.4185e-22	2.1241e-20
ENSGALG00000039576	841.661	100.564	3.0651	5.8197e-22	2.2777e-20
ENSGALG00000042564	496.98	3291	-2.7273	5.8735e-22	2.2951e-20
ENSGALG00000040189	313.574	1.64052	7.5785	5.8831e-22	2.2952e-20
ENSGALG00000035589	9.12258	250.095	-4.7769	6.0555e-22	2.3587e-20
ENSGALG00000011991	949.939	10762.8	-3.5021	6.3242e-22	2.4594e-20
ENSGALG00000008659	216.443	1775.38	-3.0361	6.4031e-22	2.4861e-20
ENSGALG00000027184	64.5146	750.125	-3.5394	6.5581e-22	2.5423e-20
ENSGALG00000001256	66.882	1858.39	-4.7963	7.036e-22	2.7232e-20
ENSGALG00000001160	760.319	68.0317	3.4823	7.1235e-22	2.7527e-20
ENSGALG00000008821	988.383	6243.63	-2.6592	7.508e-22	2.8967e-20
ENSGALG00000016426	6.78457	1001.08	-7.2051	7.6869e-22	2.961e-20
ENSGALG00000028710	91.2565	863.254	-3.2418	7.7784e-22	2.9916e-20
ENSGALG00000015442	97.416	797.809	-3.0338	8.4369e-22	3.2397e-20
ENSGALG00000033461	25.1667	1436.59	-5.835	8.498e-22	3.258e-20
ENSGALG00000014128	284.395	2025.86	-2.8326	9.4071e-22	3.6009e-20
ENSGALG00000042554	155.391	1160.91	-2.9013	9.8922e-22	3.7807e-20
ENSGALG00000035605	89.0825	827.947	-3.2163	1.0573e-21	4.0347e-20
ENSGALG00000006175	151.022	3.14462	5.5857	1.1139e-21	4.2438e-20
ENSGALG00000040229	780.433	91.811	3.0875	1.2713e-21	4.836e-20
ENSGALG00000031524	329.841	25.043	3.7193	1.2789e-21	4.8576e-20
ENSGALG00000007537	2111.55	310.885	2.7638	1.3504e-21	5.1211e-20
ENSGALG00000038885	1677.54	246.382	2.7674	1.3634e-21	5.1622e-20
ENSGALG00000029718	2.47597	128.79	-5.7009	1.4666e-21	5.5443e-20
Novel00537	382.6	32.7032	3.5483	1.5179e-21	5.7296e-20
Novel00993	11.9837	224.103	-4.225	1.5218e-21	5.7355e-20
ENSGALG00000008584	1229.2	167.143	2.8786	1.5703e-21	5.909e-20
ENSGALG00000008536	506.033	3280.19	-2.6965	1.6361e-21	6.1473e-20
ENSGALG00000015271	925.256	5767.73	-2.6401	1.6736e-21	6.2785e-20
ENSGALG00000041491	50.9607	474.693	-3.2195	1.768e-21	6.6224e-20
ENSGALG00000033002	2889.13	461.826	2.6452	1.8739e-21	7.0084e-20
ENSGALG00000039468	637.336	4054.32	-2.6693	1.9284e-21	7.201e-20
ENSGALG00000038782	3.00983	134.241	-5.479	2.0321e-21	7.5769e-20
ENSGALG00000005613	587.449	3969.46	-2.7564	2.1124e-21	7.8643e-20
ENSGALG00000012783	4835.85	97108.4	-4.3278	2.1532e-21	8.004e-20
ENSGALG00000038733	436.046	2849.59	-2.7082	2.1836e-21	8.1046e-20
ENSGALG00000013747	23.8127	311.221	-3.7081	2.3419e-21	8.679e-20
ENSGALG00000033781	2254.1	345.836	2.7044	2.3936e-21	8.8572e-20
Novel01198	117.837	0.852859	7.1103	2.4168e-21	8.9294e-20
ENSGALG00000014155	3201.92	19184.3	-2.5829	2.5191e-21	9.2931e-20
ENSGALG00000019719	2630.86	7.06892	8.5398	2.6232e-21	9.6626e-20
Novel00698	442.843	43.9771	3.332	2.6392e-21	9.7071e-20
ENSGALG00000034293	4.94475	151.382	-4.9362	2.7655e-21	1.0156e-19
ENSGALG00000037675	23726	371.582	5.9966	2.9002e-21	1.0635e-19
ENSGALG00000017136	246.412	14.6943	4.0677	3.1062e-21	1.1373e-19
ENSGALG00000014873	6206.25	1029.93	2.5912	3.1224e-21	1.1415e-19
ENSGALG00000030583	538.652	52.8653	3.349	3.1353e-21	1.1445e-19
ENSGALG00000007786	80.5181	660.027	-3.0351	3.1515e-21	1.1487e-19
ENSGALG00000012792	738.775	4562.88	-2.6267	3.2434e-21	1.1805e-19
ENSGALG00000015874	720.861	88.3612	3.0282	3.2563e-21	1.1834e-19
ENSGALG00000013887	453.716	2882.52	-2.6675	3.4418e-21	1.249e-19
ENSGALG00000016896	84.9044	684.283	-3.0107	3.6545e-21	1.3242e-19
ENSGALG00000015124	441.3	41.9106	3.3964	4.0985e-21	1.4829e-19
ENSGALG00000011657	518.416	56.3399	3.2019	4.5095e-21	1.6292e-19
ENSGALG00000006041	102.026	0	Inf	4.6445e-21	1.673e-19
ENSGALG00000006912	69.8637	604.385	-3.1129	4.6399e-21	1.673e-19
ENSGALG00000038170	175.608	1252.57	-2.8345	4.8556e-21	1.7464e-19
ENSGALG00000021910	2.35196	124.095	-5.7214	5.2691e-21	1.8924e-19
ENSGALG00000031978	8.42543	571.654	-6.0842	5.5857e-21	2.0031e-19
ENSGALG00000004978	259.17	1692.01	-2.7068	5.7141e-21	2.0462e-19
ENSGALG00000032155	18.1908	342.169	-4.2334	5.9946e-21	2.1435e-19
ENSGALG00000012952	1287.41	188.091	2.775	6.0707e-21	2.1675e-19
ENSGALG00000015110	47.5876	473.357	-3.3143	6.3299e-21	2.2568e-19
ENSGALG00000033535	9.00677	261.22	-4.8581	6.3906e-21	2.2751e-19
ENSGALG00000002597	20.4085	1268.57	-5.9579	6.9461e-21	2.4692e-19
ENSGALG00000032653	208.168	1474.58	-2.8245	7.0271e-21	2.4944e-19
ENSGALG00000012472	28.7924	319.834	-3.4736	8.4639e-21	3.0001e-19
ENSGALG00000027353	262.618	12193.6	-5.537	8.5261e-21	3.0178e-19
Novel02182	905.248	5395.96	-2.5755	9.2411e-21	3.2661e-19
ENSGALG00000005483	435.383	2802.26	-2.6862	1.0451e-20	3.6882e-19
ENSGALG00000029214	328.888	2201.53	-2.7428	1.0764e-20	3.7932e-19
ENSGALG00000014496	726.864	92.8142	2.9693	1.1018e-20	3.8774e-19
ENSGALG00000040904	17.5769	734.284	-5.3846	1.1183e-20	3.9298e-19
Novel01822	220.412	2.94496	6.2258	1.1736e-20	4.1179e-19
ENSGALG00000043806	208.561	11.1029	4.2315	1.2709e-20	4.4532e-19
ENSGALG00000037717	530.176	57.6217	3.2018	1.3811e-20	4.8321e-19
Novel03042	460.256	2824.11	-2.6173	1.4225e-20	4.9699e-19
ENSGALG00000037895	0	84.2155	#NAME?	1.4914e-20	5.2034e-19
ENSGALG00000002742	391.53	38.667	3.3399	1.5168e-20	5.2843e-19
ENSGALG00000010900	844.775	113.742	2.8928	1.5336e-20	5.3352e-19
ENSGALG00000029943	341.728	30.4717	3.4873	1.6173e-20	5.6186e-19
ENSGALG00000042003	129.441	1.91423	6.0794	1.6869e-20	5.852e-19
ENSGALG00000030991	401.046	5.03511	6.3156	1.7463e-20	6.0492e-19
ENSGALG00000040842	168.823	1542.12	-3.1913	1.8248e-20	6.3124e-19
ENSGALG00000017128	442.309	45.0857	3.2943	1.8277e-20	6.3134e-19
ENSGALG00000007570	112.097	0.820262	7.0944	1.8795e-20	6.4831e-19
ENSGALG00000013244	544.269	3362.3	-2.6271	1.9159e-20	6.5994e-19
ENSGALG00000016524	3774.56	439.117	3.1036	1.9768e-20	6.7998e-19
ENSGALG00000037328	3113.07	514.408	2.5974	2.0432e-20	7.018e-19
ENSGALG00000003340	184.748	1221.03	-2.7245	2.083e-20	7.1449e-19
Novel02797	501.149	5238.92	-3.386	2.0947e-20	7.1747e-19
ENSGALG00000001640	1269.9	193.924	2.7111	2.3324e-20	7.9777e-19
ENSGALG00000028284	991.501	11.1979	6.4683	2.6396e-20	9.0161e-19
ENSGALG00000009048	157.032	1464.1	-3.2209	2.6682e-20	9.0884e-19
ENSGALG00000041795	721.675	4242.49	-2.5555	2.6672e-20	9.0884e-19
ENSGALG00000026981	1309.61	168.428	2.9589	2.7775e-20	9.4473e-19
ENSGALG00000037802	126.957	0.353791	8.4872	2.9617e-20	1.006e-18
Novel02659	12.6123	209.054	-4.051	3.0215e-20	1.0249e-18
ENSGALG00000016102	357.689	24.1664	3.8876	3.3975e-20	1.1508e-18
ENSGALG00000031751	518.615	3040.17	-2.5514	3.4164e-20	1.1556e-18
ENSGALG00000012873	229.348	0.796518	8.1696	3.5734e-20	1.2071e-18
ENSGALG00000040504	232.97	1517.41	-2.7034	3.8082e-20	1.2846e-18
Novel01115	75.8143	3022.64	-5.3172	3.8405e-20	1.2937e-18
ENSGALG00000006073	105.041	779.652	-2.8919	4.0477e-20	1.3616e-18
ENSGALG00000011881	1223.75	185.712	2.7202	4.2781e-20	1.4371e-18
ENSGALG00000038316	545.851	5038.05	-3.2063	4.3217e-20	1.4498e-18
ENSGALG00000038943	34.8632	355.363	-3.3495	4.4436e-20	1.4886e-18
Novel01420	153.046	4.91553	4.9605	4.6768e-20	1.5646e-18
ENSGALG00000032658	45.3574	416.563	-3.1991	5.122e-20	1.7112e-18
ENSGALG00000011020	2475.56	13754.7	-2.4741	5.4355e-20	1.8135e-18
ENSGALG00000038799	286.263	22.3452	3.6793	5.5526e-20	1.85e-18
ENSGALG00000017179	5767.24	763.278	2.9176	5.5969e-20	1.8622e-18
ENSGALG00000027771	848.818	17775.5	-4.3883	5.6151e-20	1.8654e-18
Novel01753	48.3787	510.365	-3.3991	5.6217e-20	1.8654e-18
ENSGALG00000004168	1271.81	7278.48	-2.5168	5.7165e-20	1.8943e-18
ENSGALG00000030597	1244.39	189.964	2.7116	6.3458e-20	2.1e-18
ENSGALG00000006221	284.706	22.9203	3.6348	6.3944e-20	2.1132e-18
ENSGALG00000042385	38.1425	381.067	-3.3206	6.408e-20	2.1148e-18
ENSGALG00000039001	835.567	5007.78	-2.5833	6.4623e-20	2.1298e-18
ENSGALG00000028570	282.962	24.6841	3.519	6.5136e-20	2.1439e-18
ENSGALG00000011950	3733.75	20900.2	-2.4848	6.817e-20	2.2407e-18
ENSGALG00000033047	159.852	5.64686	4.8231	7.0655e-20	2.3193e-18
ENSGALG00000016299	206.543	1.11771	7.5297	8.2903e-20	2.7177e-18
ENSGALG00000006344	339.867	2058.14	-2.5983	8.5545e-20	2.7968e-18
ENSGALG00000040794	239.1	15.9601	3.9051	8.5547e-20	2.7968e-18
ENSGALG00000032550	414.035	10363.6	-4.6456	8.7982e-20	2.8726e-18
ENSGALG00000040002	3.03314	243.52	-6.3271	8.9737e-20	2.926e-18
ENSGALG00000010705	396.492	2468.46	-2.6382	9.2457e-20	3.0106e-18
ENSGALG00000035065	536.578	64.4009	3.0586	9.321e-20	3.0311e-18
ENSGALG00000014995	263.623	3113.83	-3.5621	1.0016e-19	3.2527e-18
ENSGALG00000034281	245.144	1512.77	-2.6255	1.0787e-19	3.4986e-18
ENSGALG00000031152	475.924	44.2458	3.4271	1.0947e-19	3.5458e-18
ENSGALG00000028424	92.7994	0	Inf	1.2241e-19	3.9597e-18
ENSGALG00000033800	8.60483	250.011	-4.8607	1.2293e-19	3.9712e-18
ENSGALG00000024398	2398.71	12796	-2.4154	1.2358e-19	3.9869e-18
ENSGALG00000039022	62.0073	502.152	-3.0176	1.2519e-19	4.0334e-18
ENSGALG00000038393	228.207	1328.83	-2.5417	1.2536e-19	4.0336e-18
ENSGALG00000014847	4427.69	35443.6	-3.0009	1.2602e-19	4.0496e-18
ENSGALG00000033295	527.43	3071.32	-2.5418	1.3031e-19	4.182e-18
ENSGALG00000038146	49.02	1295.3	-4.7238	1.4102e-19	4.5196e-18
ENSGALG00000008589	79.3077	594.069	-2.9051	1.4261e-19	4.5646e-18
ENSGALG00000027091	590.348	75.8262	2.9608	1.4316e-19	4.5763e-18
ENSGALG00000015358	444.358	49.4353	3.1681	1.4925e-19	4.7605e-18
Novel02205	936.932	137.085	2.7729	1.4932e-19	4.7605e-18
ENSGALG00000021542	176.384	7.89114	4.4823	1.5233e-19	4.8505e-18
ENSGALG00000010356	497.639	57.4924	3.1137	1.5981e-19	5.0818e-18
ENSGALG00000006864	1999.21	55.4111	5.1731	1.631e-19	5.1799e-18
ENSGALG00000011220	494.785	2885.74	-2.5441	1.7049e-19	5.4073e-18
ENSGALG00000008177	3.2026	715.848	-7.8043	1.7466e-19	5.5324e-18
ENSGALG00000009995	307.408	3088.26	-3.3286	1.7674e-19	5.5913e-18
Novel02961	300.047	25.4009	3.5622	1.781e-19	5.6269e-18
ENSGALG00000003904	91.2118	0	Inf	2.0535e-19	6.4793e-18
ENSGALG00000036010	27.4572	308.463	-3.4898	2.1061e-19	6.6367e-18
ENSGALG00000040161	199.672	1257.98	-2.6554	2.124e-19	6.6844e-18
Novel01402	14.7397	216.393	-3.8759	2.1645e-19	6.8033e-18
ENSGALG00000009024	333.304	5853.67	-4.1344	2.2441e-19	7.0443e-18
ENSGALG00000043287	388.649	2539.15	-2.7078	2.2549e-19	7.0692e-18
ENSGALG00000035913	3.68223	8933.4	-11.244	2.2949e-19	7.1853e-18
ENSGALG00000036572	572.132	72.8535	2.9733	2.4907e-19	7.7885e-18
ENSGALG00000015961	1667.59	9181.33	-2.4609	2.6769e-19	8.3601e-18
ENSGALG00000035535	950.403	5324.33	-2.486	3.129e-19	9.7593e-18
ENSGALG00000007082	150.083	4093.22	-4.7694	3.2485e-19	1.0119e-17
ENSGALG00000015363	443.52	50.1812	3.1438	3.412e-19	1.0615e-17
ENSGALG00000039682	84.4979	644.988	-2.9323	3.694e-19	1.1478e-17
ENSGALG00000031890	5960.92	32250.5	-2.4357	3.7915e-19	1.1766e-17
ENSGALG00000022896	552.799	0	Inf	3.8234e-19	1.185e-17
ENSGALG00000034337	110.602	769.831	-2.7992	3.8902e-19	1.2041e-17
ENSGALG00000004400	887.247	5079.07	-2.5172	4.114e-19	1.2718e-17
ENSGALG00000009800	887.15	4920.74	-2.4716	4.1767e-19	1.2896e-17
Novel01169	10.9483	183.206	-4.0647	4.2097e-19	1.2981e-17
ENSGALG00000016430	1250.88	6840.89	-2.4512	4.2446e-19	1.3072e-17
ENSGALG00000004687	404.668	27.4298	3.8829	4.2854e-19	1.3181e-17
ENSGALG00000012705	317.587	2009.21	-2.6614	4.4077e-19	1.354e-17
ENSGALG00000026864	413.045	2420.69	-2.551	4.8008e-19	1.4729e-17
ENSGALG00000030712	20798.3	97.2566	7.7405	4.8383e-19	1.4826e-17
ENSGALG00000005849	1145.93	19037.6	-4.0543	5.311e-19	1.6254e-17
ENSGALG00000011353	70.8555	575.202	-3.0211	5.382e-19	1.645e-17
ENSGALG00000030377	1787.6	72.7515	4.6189	5.7854e-19	1.7661e-17
ENSGALG00000006602	113.674	1.4715	6.2715	6.3206e-19	1.9271e-17
ENSGALG00000016661	13.247	195.565	-3.8839	6.3668e-19	1.9388e-17
ENSGALG00000004274	2670.96	56.2242	5.57	6.3794e-19	1.9402e-17
ENSGALG00000001632	428.038	48.0138	3.1562	6.484e-19	1.9696e-17
ENSGALG00000037453	612.583	82.0266	2.9007	6.5063e-19	1.9739e-17
ENSGALG00000011630	2000.8	348.041	2.5232	6.7956e-19	2.0591e-17
ENSGALG00000017091	186.204	1163.81	-2.6439	8.738e-19	2.6443e-17
ENSGALG00000038850	1415.1	7853.65	-2.4725	8.7559e-19	2.6465e-17
ENSGALG00000013640	271.976	1575.13	-2.5339	9.5104e-19	2.8695e-17
ENSGALG00000027583	17.6018	3941.94	-7.807	9.5173e-19	2.8695e-17
Novel00693	5.56909	148.089	-4.7329	1.0037e-18	3.0225e-17
ENSGALG00000009654	740.843	13029.1	-4.1364	1.0057e-18	3.0247e-17
ENSGALG00000029140	4745.73	65.213	6.1853	1.0139e-18	3.0456e-17
ENSGALG00000009032	128.261	2.9756	5.4298	1.0794e-18	3.2384e-17
ENSGALG00000014236	90.9733	647.493	-2.8313	1.0841e-18	3.2486e-17
ENSGALG00000042422	1321.94	93.7902	3.8171	1.1611e-18	3.475e-17
ENSGALG00000007904	685.211	3751.96	-2.453	1.2027e-18	3.5953e-17
ENSGALG00000037401	1856.29	9833.21	-2.4052	1.3743e-18	4.1031e-17
ENSGALG00000031122	249.833	16.6746	3.9052	1.4171e-18	4.2258e-17
ENSGALG00000031051	3.82955	124.917	-5.0276	1.5354e-18	4.5729e-17
ENSGALG00000005398	451.815	3089.57	-2.7736	1.5649e-18	4.655e-17
ENSGALG00000027454	508.097	65.9951	2.9447	1.5705e-18	4.6604e-17
ENSGALG00000039448	1354.51	226.556	2.5798	1.5698e-18	4.6604e-17
ENSGALG00000006027	134.88	1364.54	-3.3387	1.6203e-18	4.8022e-17
ENSGALG00000042257	296.925	61424.2	-7.6926	1.6757e-18	4.9604e-17
ENSGALG00000015437	1069.24	5720.56	-2.4196	1.6842e-18	4.9797e-17
ENSGALG00000012845	223.722	2471.5	-3.4656	1.772e-18	5.2329e-17
ENSGALG00000036093	18.4455	229.086	-3.6345	1.8216e-18	5.373e-17
ENSGALG00000028302	1906.64	9975.77	-2.3874	1.834e-18	5.4029e-17
ENSGALG00000003582	86.7618	0	Inf	1.8535e-18	5.4537e-17
ENSGALG00000001506	587.023	80.888	2.8594	1.9745e-18	5.8029e-17
ENSGALG00000040428	738.89	3982.01	-2.4301	2.0197e-18	5.9284e-17
ENSGALG00000003484	330.659	33.5114	3.3026	2.1057e-18	6.1735e-17
ENSGALG00000033234	14.3835	390.49	-4.7628	2.1289e-18	6.234e-17
ENSGALG00000008084	893.159	4762.04	-2.4146	2.1584e-18	6.3129e-17
ENSGALG00000043568	57.9142	1124.79	-4.2796	2.2047e-18	6.4406e-17
ENSGALG00000008537	1634.59	231.222	2.8216	2.2725e-18	6.6306e-17
ENSGALG00000017046	14643.1	2927.86	2.3223	2.3109e-18	6.7348e-17
ENSGALG00000031427	156.735	6.73198	4.5412	2.3179e-18	6.7472e-17
ENSGALG00000003217	7.33497	152.285	-4.3758	2.4144e-18	7.0195e-17
ENSGALG00000009212	526.698	67.6436	2.961	2.4217e-18	7.0325e-17
ENSGALG00000026449	361.868	1985.39	-2.4559	2.4895e-18	7.2208e-17
ENSGALG00000013793	129.846	855.488	-2.7199	2.566e-18	7.4338e-17
ENSGALG00000027471	579.538	3097.98	-2.4184	2.578e-18	7.4598e-17
ENSGALG00000008805	206.731	13223.9	-5.9992	2.7962e-18	8.0814e-17
ENSGALG00000010537	67.7618	503.061	-2.8922	2.8516e-18	8.232e-17
ENSGALG00000043642	408.646	48.3422	3.0795	2.889e-18	8.3299e-17
ENSGALG00000021627	131.678	874.253	-2.731	2.9558e-18	8.5127e-17
ENSGALG00000009241	4058.41	756.919	2.4227	2.9601e-18	8.515e-17
ENSGALG00000034024	122.046	1653.54	-3.7601	2.9652e-18	8.5195e-17
ENSGALG00000008298	3723.61	687.066	2.4382	3.2387e-18	9.2945e-17
ENSGALG00000043428	395.402	2145.55	-2.44	3.3058e-18	9.476e-17
ENSGALG00000004088	617.558	3300.03	-2.4178	3.3122e-18	9.4832e-17
ENSGALG00000032386	142.087	893.466	-2.6526	3.4359e-18	9.8257e-17
ENSGALG00000005465	2185.22	11082.4	-2.3424	3.5043e-18	1.0009e-16
ENSGALG00000039337	2346.24	11836.1	-2.3348	3.5329e-18	1.0079e-16
ENSGALG00000033344	651.285	95.2769	2.7731	3.5949e-18	1.0245e-16
ENSGALG00000028659	3.07184	128.159	-5.3827	3.6372e-18	1.0353e-16
ENSGALG00000033715	0.533863	82.2833	-7.268	3.677e-18	1.0454e-16
Novel03034	554.005	77.0417	2.8462	4.0988e-18	1.164e-16
ENSGALG00000000943	658.014	3459.51	-2.3944	4.1546e-18	1.1784e-16
ENSGALG00000005095	197.343	1149.58	-2.5423	4.2102e-18	1.1928e-16
ENSGALG00000001557	479.547	2620.27	-2.45	4.2186e-18	1.1938e-16
ENSGALG00000028600	27612.9	5578	2.3075	4.3875e-18	1.2402e-16
ENSGALG00000000920	185.486	11.3263	4.0336	4.5092e-18	1.2731e-16
ENSGALG00000001620	94.4798	2394.25	-4.6634	4.9385e-18	1.3927e-16
ENSGALG00000035525	433.071	2478.11	-2.5166	4.9603e-18	1.3972e-16
ENSGALG00000015390	122.36	782.411	-2.6768	5.2397e-18	1.4742e-16
ENSGALG00000015053	287.013	27.827	3.3666	5.3524e-18	1.5042e-16
Novel01595	2389.84	163.799	3.8669	5.4515e-18	1.5303e-16
ENSGALG00000041380	604.473	46062	-6.2518	5.6441e-18	1.5826e-16
ENSGALG00000033898	109.965	698.507	-2.6672	5.7804e-18	1.6189e-16
ENSGALG00000002033	1040.16	5205.54	-2.3232	5.8126e-18	1.6261e-16
ENSGALG00000016809	153.516	2.76709	5.7939	6.0291e-18	1.6847e-16
ENSGALG00000011792	166.96	8.48604	4.2983	6.1988e-18	1.7301e-16
ENSGALG00000031035	585.407	3051.32	-2.3819	6.357e-18	1.7723e-16
ENSGALG00000036034	319.229	33.0719	3.2709	6.492e-18	1.8078e-16
ENSGALG00000026380	1559.95	145.705	3.4204	6.6221e-18	1.842e-16
ENSGALG00000034973	604.067	86.3529	2.8064	6.6991e-18	1.8613e-16
ENSGALG00000015151	341.966	37.8638	3.175	6.8321e-18	1.8961e-16
ENSGALG00000035237	245.776	3590.77	-3.8689	7.3998e-18	2.0513e-16
ENSGALG00000001949	3580.93	17952.7	-2.3258	8.28e-18	2.2927e-16
ENSGALG00000015701	251.337	17.7282	3.8255	1.0002e-17	2.7664e-16
ENSGALG00000028308	149.929	6.59555	4.5066	1.062e-17	2.9339e-16
ENSGALG00000009854	390.038	47.0237	3.0522	1.075e-17	2.9666e-16
ENSGALG00000003261	3976.09	25543.7	-2.6835	1.0965e-17	3.0225e-16
ENSGALG00000004523	597.715	3132.65	-2.3899	1.116e-17	3.0728e-16
Novel01675	767.892	3943.54	-2.3605	1.1205e-17	3.0817e-16
Novel01927	8.1531	273.387	-5.0674	1.1711e-17	3.2171e-16
ENSGALG00000005448	3391.31	46731.4	-3.7845	1.205e-17	3.3067e-16
ENSGALG00000038721	649.989	3422.84	-2.3967	1.2314e-17	3.3752e-16
ENSGALG00000005901	239.515	1334.75	-2.4784	1.3287e-17	3.6379e-16
ENSGALG00000011324	142.072	1414.92	-3.316	1.3349e-17	3.6508e-16
ENSGALG00000013191	535.623	2791.9	-2.382	1.3704e-17	3.7437e-16
ENSGALG00000016406	412.523	2436.42	-2.5622	1.3857e-17	3.7812e-16
ENSGALG00000004809	258.901	1445.76	-2.4814	1.3874e-17	3.7816e-16
ENSGALG00000017228	8.96749	157.999	-4.1391	1.5098e-17	4.1105e-16
ENSGALG00000009703	1498.84	7491.57	-2.3214	1.5449e-17	4.2014e-16
ENSGALG00000006997	302.693	3.70693	6.3515	1.6278e-17	4.4221e-16
ENSGALG00000008014	417.453	2231.33	-2.4182	1.6462e-17	4.4671e-16
ENSGALG00000040367	27.1257	272.005	-3.3259	1.8087e-17	4.9025e-16
ENSGALG00000007358	529.827	2803.35	-2.4036	2.0846e-17	5.6441e-16
ENSGALG00000000720	78.1642	3247.54	-5.3767	2.0924e-17	5.6591e-16
ENSGALG00000027415	75.9494	539.087	-2.8274	2.1488e-17	5.805e-16
ENSGALG00000005589	117.669	724.802	-2.6229	2.1808e-17	5.8851e-16
ENSGALG00000010051	71.669	502.119	-2.8086	2.2283e-17	6.0065e-16
ENSGALG00000005493	328.494	1883.55	-2.5195	2.2471e-17	6.0505e-16
ENSGALG00000013968	1175.92	5838.98	-2.3119	2.2675e-17	6.0989e-16
ENSGALG00000042354	52.6748	409.814	-2.9598	2.2773e-17	6.1185e-16
ENSGALG00000000314	190.831	1.41516	7.0752	2.2901e-17	6.1401e-16
ENSGALG00000038813	1610.98	23786	-3.8841	2.2904e-17	6.1401e-16
ENSGALG00000011469	3815.36	432.496	3.1411	2.3619e-17	6.3248e-16
ENSGALG00000043583	305.45	32.5696	3.2293	2.4189e-17	6.4704e-16
ENSGALG00000004521	10140	49352.1	-2.2831	2.4428e-17	6.5272e-16
ENSGALG00000005763	580.596	84.0278	2.7886	2.45e-17	6.5392e-16
ENSGALG00000031273	70.9237	478.304	-2.7536	2.4609e-17	6.5612e-16
ENSGALG00000023279	943.618	4863.68	-2.3658	2.618e-17	6.9723e-16
ENSGALG00000009170	70.2709	493.005	-2.8106	2.6247e-17	6.9825e-16
ENSGALG00000004037	471.095	65.2569	2.8518	2.7389e-17	7.2784e-16
Novel02615	0.835681	114.778	-7.1017	2.7813e-17	7.3831e-16
ENSGALG00000002283	268.946	1447.42	-2.4281	2.8599e-17	7.5835e-16
ENSGALG00000013709	216.116	1190.91	-2.4622	2.9471e-17	7.8064e-16
ENSGALG00000012165	1237.75	220.664	2.4878	2.955e-17	7.8188e-16
ENSGALG00000016281	1585.09	8036.93	-2.3421	3.0049e-17	7.9421e-16
ENSGALG00000021656	0.301818	73.6192	-7.9303	3.1426e-17	8.2971e-16
ENSGALG00000008114	634.633	98.6113	2.6861	3.3705e-17	8.8891e-16
ENSGALG00000031747	479.701	66.0842	2.8598	3.3775e-17	8.8981e-16
ENSGALG00000011661	1459.93	7093.41	-2.2806	3.4072e-17	8.9569e-16
ENSGALG00000027374	5.81869	350.847	-5.914	3.4056e-17	8.9569e-16
ENSGALG00000041419	2267.89	18284.7	-3.0112	3.4197e-17	8.9802e-16
ENSGALG00000011914	321.567	34.8961	3.204	3.9811e-17	1.0443e-15
ENSGALG00000000824	14.4063	190.586	-3.7257	4.0762e-17	1.0681e-15
ENSGALG00000026862	3792.08	757.647	2.3234	4.1728e-17	1.0923e-15
ENSGALG00000032270	817.839	93.5001	3.1288	4.2104e-17	1.1009e-15
ENSGALG00000033834	381.822	46.7363	3.0303	4.4417e-17	1.1602e-15
ENSGALG00000029410	3.57419	113.976	-4.995	4.6151e-17	1.2042e-15
ENSGALG00000017064	602.357	90.6601	2.7321	4.7679e-17	1.2427e-15
ENSGALG00000035978	1862.73	360.075	2.3711	4.8115e-17	1.2527e-15
ENSGALG00000008066	1225.34	5965.33	-2.2834	4.9002e-17	1.2745e-15
ENSGALG00000007917	1268.98	48.3273	4.7147	5.2826e-17	1.3725e-15
ENSGALG00000015967	78.2028	0	Inf	5.3388e-17	1.3856e-15
ENSGALG00000007131	3095.46	617.317	2.3261	5.5532e-17	1.4397e-15
ENSGALG00000038946	12.9976	994.036	-6.257	5.7542e-17	1.4902e-15
ENSGALG00000015480	1838.69	352.62	2.3825	5.8532e-17	1.5143e-15
ENSGALG00000043799	401.887	51.8229	2.9551	5.9578e-17	1.5397e-15
ENSGALG00000026452	980.66	10969.7	-3.4836	6.1951e-17	1.5993e-15
ENSGALG00000005309	2623.7	395.854	2.7286	6.3915e-17	1.6483e-15
ENSGALG00000036214	1383.64	6568.66	-2.2471	6.5431e-17	1.6856e-15
Novel00788	89.1819	568.825	-2.6732	6.7839e-17	1.7458e-15
Novel01511	403.232	3.14462	7.0026	6.8572e-17	1.7628e-15
ENSGALG00000036270	875.61	147.605	2.5685	6.8972e-17	1.7712e-15
ENSGALG00000032790	965.608	4763.86	-2.3026	7.1874e-17	1.8419e-15
Novel00706	38.5009	342.865	-3.1547	7.1805e-17	1.8419e-15
ENSGALG00000011275	332.768	38.5357	3.1103	7.2428e-17	1.8541e-15
ENSGALG00000007300	3197.23	356.236	3.1659	7.3488e-17	1.8793e-15
ENSGALG00000003496	276.577	1480.81	-2.4206	7.3884e-17	1.8874e-15
ENSGALG00000029857	66.9488	460.714	-2.7827	7.4926e-17	1.9121e-15
ENSGALG00000036783	2704.23	13440.6	-2.3133	7.547e-17	1.9239e-15
ENSGALG00000015132	1846	356.004	2.3744	7.6025e-17	1.9361e-15
ENSGALG00000036686	817.204	111.697	2.8711	7.6153e-17	1.9373e-15
ENSGALG00000032699	1284.91	236.001	2.4448	7.6319e-17	1.9395e-15
ENSGALG00000042961	387.71	21.0062	4.2061	7.9049e-17	2.0068e-15
ENSGALG00000016546	704.043	113.564	2.6322	7.9744e-17	2.0223e-15
ENSGALG00000007448	45.4418	1134.25	-4.6416	8.0044e-17	2.0278e-15
Novel00186	401.106	16.4374	4.6089	8.069e-17	2.0421e-15
ENSGALG00000002321	3017.83	14281.9	-2.2426	8.0955e-17	2.0467e-15
ENSGALG00000010326	348.885	42.7013	3.0304	8.6542e-17	2.1857e-15
ENSGALG00000013956	146.02	6.88415	4.4067	8.69e-17	2.1924e-15
ENSGALG00000032072	228.442	1205.51	-2.3997	9.0434e-17	2.2792e-15
ENSGALG00000025996	1022.95	184.427	2.4716	9.1398e-17	2.3012e-15
ENSGALG00000008998	23.9889	254.706	-3.4084	9.6082e-17	2.4166e-15
Novel01609	240.119	22.6446	3.4065	9.6201e-17	2.4171e-15
ENSGALG00000007676	456.407	64.9812	2.8122	9.8407e-17	2.47e-15
ENSGALG00000013001	350.044	27.0611	3.6932	1.0068e-16	2.5245e-15
ENSGALG00000039171	247.503	23.2613	3.4114	1.0171e-16	2.5476e-15
ENSGALG00000011283	169.421	937.145	-2.4677	1.0468e-16	2.6193e-15
ENSGALG00000029261	3806.17	18200.8	-2.2576	1.0637e-16	2.6589e-15
Novel02529	78.5189	607.054	-2.9507	1.0768e-16	2.689e-15
ENSGALG00000041915	471.614	15.131	4.962	1.0931e-16	2.7269e-15
ENSGALG00000012836	1113.97	203.987	2.4492	1.1191e-16	2.7888e-15
ENSGALG00000021569	198.317	1021.06	-2.3642	1.1691e-16	2.9105e-15
ENSGALG00000036426	25.8221	445.421	-4.1085	1.1949e-16	2.9716e-15
ENSGALG00000008597	1398.31	6598.11	-2.2384	1.2165e-16	3.0223e-15
ENSGALG00000010133	2313.67	44.972	5.685	1.2353e-16	3.066e-15
ENSGALG00000034384	619.575	19.7601	4.9706	1.2767e-16	3.1635e-15
Novel01838	1.50909	85.1011	-5.8174	1.2772e-16	3.1635e-15
ENSGALG00000033786	15.3882	194.908	-3.6629	1.3366e-16	3.3073e-15
ENSGALG00000030645	885.246	4259.97	-2.2667	1.3646e-16	3.3699e-15
ENSGALG00000030969	3144.16	14457.2	-2.201	1.3647e-16	3.3699e-15
ENSGALG00000007837	3335.81	366.412	3.1865	1.387e-16	3.4216e-15
ENSGALG00000032980	178.651	12.6811	3.8164	1.4069e-16	3.4672e-15
ENSGALG00000009107	791.947	4009.62	-2.34	1.4185e-16	3.4923e-15
ENSGALG00000033315	3928.53	13.0694	8.2317	1.451e-16	3.5685e-15
ENSGALG00000006424	120.388	708.474	-2.557	1.4675e-16	3.6056e-15
ENSGALG00000004509	19191.7	88782.8	-2.2098	1.4876e-16	3.6512e-15
ENSGALG00000007931	2295.49	10886.8	-2.2457	1.4908e-16	3.6554e-15
ENSGALG00000026757	497.825	73.747	2.755	1.6105e-16	3.945e-15
ENSGALG00000012348	2545.04	520.892	2.2886	1.7661e-16	4.3218e-15
ENSGALG00000005330	1007.93	185.776	2.4398	1.8666e-16	4.5631e-15
ENSGALG00000020331	1.19173	81.1527	-6.0895	1.8811e-16	4.5941e-15
ENSGALG00000010868	75.3188	0	Inf	1.9969e-16	4.8721e-15
ENSGALG00000025804	4.11583	113.712	-4.7881	2.0382e-16	4.9677e-15
ENSGALG00000043476	358.004	37.6019	3.2511	2.0857e-16	5.0784e-15
ENSGALG00000012220	336.165	40.9747	3.0364	2.0913e-16	5.087e-15
ENSGALG00000041347	690.965	0.885455	9.608	2.1844e-16	5.3082e-15
ENSGALG00000036881	57.7843	418.4	-2.8561	2.2149e-16	5.377e-15
ENSGALG00000015693	693.559	3583.23	-2.3692	2.2501e-16	5.457e-15
ENSGALG00000024481	783.54	71.7231	3.4495	2.3251e-16	5.6333e-15
ENSGALG00000008127	168.571	903.356	-2.4219	2.4281e-16	5.877e-15
ENSGALG00000006174	1301.22	181.109	2.8449	2.4403e-16	5.9007e-15
ENSGALG00000040755	261.945	1376.33	-2.3935	2.4484e-16	5.9145e-15
ENSGALG00000002990	4525.88	963.833	2.2313	2.5201e-16	6.074e-15
ENSGALG00000008902	16.8124	456.095	-4.7617	2.5219e-16	6.074e-15
ENSGALG00000015712	425.076	58.7087	2.8561	2.5171e-16	6.074e-15
ENSGALG00000021362	183.999	14.4729	3.6683	2.5386e-16	6.1081e-15
ENSGALG00000010540	127.234	5.20413	4.6117	2.5594e-16	6.152e-15
ENSGALG00000021021	723.894	120.249	2.5898	2.5643e-16	6.1579e-15
Novel00115	6.48376	129.213	-4.3168	2.7237e-16	6.5341e-15
ENSGALG00000010805	1195.26	5561.97	-2.2183	2.7896e-16	6.6857e-15
ENSGALG00000028994	121.965	708.936	-2.5392	2.7949e-16	6.6918e-15
ENSGALG00000008081	133.748	753.207	-2.4935	2.7979e-16	6.6926e-15
ENSGALG00000032153	283.079	31.4946	3.168	2.8617e-16	6.8384e-15
ENSGALG00000015786	256.684	1389.94	-2.437	3.1352e-16	7.4846e-15
ENSGALG00000012964	387.029	1920.75	-2.3112	3.1939e-16	7.6174e-15
ENSGALG00000007080	328.354	11.2937	4.8617	3.3688e-16	8.0266e-15
ENSGALG00000000102	598.876	97.2369	2.6227	3.3735e-16	8.0299e-15
ENSGALG00000017493	453.541	66.0535	2.7795	3.5307e-16	8.396e-15
ENSGALG00000001330	4283.93	19441.5	-2.1821	3.5666e-16	8.473e-15
ENSGALG00000029694	2998.25	13472.3	-2.1678	3.6365e-16	8.6308e-15
ENSGALG00000005180	5223.49	42.5477	6.9398	3.735e-16	8.856e-15
ENSGALG00000040253	5.00473	121.817	-4.6053	3.7721e-16	8.9353e-15
ENSGALG00000029319	1720.42	7772.06	-2.1755	3.884e-16	9.1915e-15
ENSGALG00000042199	39.5306	452.424	-3.5166	3.9334e-16	9.2992e-15
ENSGALG00000011238	7024.92	1560.16	2.1708	4.0035e-16	9.4559e-15
ENSGALG00000026315	2420.39	500.274	2.2744	4.1773e-16	9.8569e-15
ENSGALG00000036678	498.331	78.8776	2.6594	4.4885e-16	1.0581e-14
ENSGALG00000034453	1871.35	377.669	2.3089	4.8025e-16	1.131e-14
ENSGALG00000032984	1882.49	372.806	2.3361	4.8832e-16	1.1489e-14
ENSGALG00000030643	671.817	115.306	2.5426	4.9158e-16	1.1555e-14
ENSGALG00000006267	1710.41	343.295	2.3168	5.1603e-16	1.2118e-14
ENSGALG00000011930	122.563	4.11902	4.8951	5.222e-16	1.2251e-14
ENSGALG00000023772	75.0094	14299.8	-7.5747	5.297e-16	1.2415e-14
ENSGALG00000040834	2679.84	557.778	2.2644	5.4726e-16	1.2814e-14
Novel01080	132.81	6.2655	4.4058	5.6274e-16	1.3164e-14
ENSGALG00000004239	3024.97	206.402	3.8734	5.6725e-16	1.3257e-14
ENSGALG00000026264	52.455	1285.67	-4.6153	6.3664e-16	1.4864e-14
ENSGALG00000016986	470.382	2198.46	-2.2246	6.3943e-16	1.4915e-14
ENSGALG00000001564	187.201	972.452	-2.377	6.583e-16	1.5341e-14
ENSGALG00000008864	2989.65	13633.6	-2.1891	6.695e-16	1.5587e-14
ENSGALG00000008141	943.877	177.934	2.4073	6.7035e-16	1.5592e-14
ENSGALG00000000690	110.627	3.56361	4.9562	6.7365e-16	1.5654e-14
ENSGALG00000000791	591.165	98.0628	2.5918	6.7531e-16	1.5677e-14
ENSGALG00000008713	1017.67	76.9606	3.725	6.9239e-16	1.6059e-14
ENSGALG00000010722	869.149	164.347	2.4029	7.1303e-16	1.6522e-14
ENSGALG00000015209	195.091	1023.31	-2.391	7.2136e-16	1.6699e-14
ENSGALG00000029292	4796.94	1047.36	2.1954	7.2638e-16	1.6799e-14
ENSGALG00000035810	22.9223	634.504	-4.7908	7.4303e-16	1.7151e-14
Novel01227	1401.65	165.239	3.0845	7.4246e-16	1.7151e-14
ENSGALG00000014297	121.502	671.892	-2.4672	8.1019e-16	1.8684e-14
ENSGALG00000027316	853.835	0	Inf	8.1382e-16	1.875e-14
ENSGALG00000011406	65.7134	694.864	-3.4025	8.4716e-16	1.95e-14
ENSGALG00000030115	1181.83	73.3142	4.0108	8.5397e-16	1.9638e-14
ENSGALG00000012160	352.231	46.2667	2.9285	8.8141e-16	2.025e-14
ENSGALG00000009638	830.929	3901.86	-2.2314	9.021e-16	2.0706e-14
ENSGALG00000032877	2.275	92.3125	-5.3426	9.3396e-16	2.1414e-14
ENSGALG00000042246	634.042	2949.19	-2.2177	9.3469e-16	2.1414e-14
ENSGALG00000001885	284.626	0	Inf	9.5168e-16	2.1783e-14
ENSGALG00000043307	1102.53	5036.62	-2.1916	9.7368e-16	2.2265e-14
ENSGALG00000035716	70.6797	0	Inf	1.0225e-15	2.3359e-14
ENSGALG00000032718	81.7648	0.353791	7.8524	1.0639e-15	2.4282e-14
ENSGALG00000010269	504.097	78.6114	2.6809	1.1114e-15	2.5343e-14
ENSGALG00000014754	0.232046	197.087	-9.7302	1.152e-15	2.6245e-14
ENSGALG00000009076	1300.98	5818.8	-2.1611	1.16e-15	2.6392e-14
ENSGALG00000015720	1340	76.2061	4.1362	1.1606e-15	2.6392e-14
ENSGALG00000037203	20352.1	4676.9	2.1216	1.2124e-15	2.7544e-14
ENSGALG00000037029	103.401	2636.29	-4.6722	1.2288e-15	2.7891e-14
ENSGALG00000001718	683.318	3219.72	-2.2363	1.2895e-15	2.9242e-14
ENSGALG00000021285	642.353	113.017	2.5068	1.2921e-15	2.9271e-14
ENSGALG00000030209	1150.66	48.6948	4.5625	1.3029e-15	2.949e-14
ENSGALG00000002495	5271.24	22919.5	-2.1204	1.3044e-15	2.9496e-14
ENSGALG00000032469	280.682	1358.71	-2.2752	1.3893e-15	3.1388e-14
ENSGALG00000042851	42.3048	322.922	-2.9323	1.399e-15	3.1576e-14
ENSGALG00000029187	1.19173	76.4774	-6.0039	1.4326e-15	3.2283e-14
ENSGALG00000038787	15.4202	196.892	-3.6745	1.4329e-15	3.2283e-14
ENSGALG00000023738	401.552	20.5061	4.2915	1.4571e-15	3.2797e-14
ENSGALG00000013149	31.7431	296.972	-3.2258	1.4862e-15	3.3421e-14
ENSGALG00000004240	92.1168	548.294	-2.5734	1.5123e-15	3.3978e-14
Novel01608	4.9902	112.91	-4.4999	1.5902e-15	3.5695e-14
ENSGALG00000015917	156968	36505.9	2.1043	1.71e-15	3.8349e-14
Novel03171	22.0619	230.796	-3.387	1.7279e-15	3.8714e-14
ENSGALG00000029502	527.889	2415.83	-2.1942	1.795e-15	4.0181e-14
ENSGALG00000011529	66.463	425.899	-2.6799	1.8121e-15	4.0527e-14
ENSGALG00000009740	26.5073	237.161	-3.1614	1.8297e-15	4.0883e-14
ENSGALG00000040833	656.124	114.139	2.5232	1.8593e-15	4.1507e-14
ENSGALG00000038748	2749.67	12185.6	-2.1478	1.8616e-15	4.1519e-14
Novel00046	391.54	57.7611	2.761	1.88e-15	4.1891e-14
Novel02838	81.9655	486.162	-2.5683	1.9009e-15	4.2319e-14
ENSGALG00000034272	238.585	24.9888	3.2551	1.9561e-15	4.3508e-14
Novel00493	973.495	12.2513	6.3122	1.9891e-15	4.4203e-14
ENSGALG00000031906	68.8216	0	Inf	2.0178e-15	4.4799e-14
ENSGALG00000005757	380.04	1771.09	-2.2204	2.0253e-15	4.4923e-14
ENSGALG00000006922	4.01455	107.788	-4.7468	2.0411e-15	4.5233e-14
ENSGALG00000015010	249.082	15.2783	4.0271	2.2239e-15	4.924e-14
ENSGALG00000003282	1202.78	5428.7	-2.1742	2.2354e-15	4.9449e-14
Novel02610	0.905454	71.3829	-6.3008	2.2416e-15	4.9543e-14
ENSGALG00000001209	42.4685	1964.46	-5.5316	2.3189e-15	5.1204e-14
Novel00908	819.41	65.3084	3.6492	2.3305e-15	5.1415e-14
ENSGALG00000036310	443.394	2088.7	-2.2359	2.3428e-15	5.164e-14
Novel00458	251.757	28.7886	3.1285	2.4058e-15	5.2979e-14
ENSGALG00000028537	2099.2	9085.28	-2.1137	2.44e-15	5.3685e-14
ENSGALG00000041422	891.937	3979.93	-2.1577	2.472e-15	5.434e-14
ENSGALG00000005476	199.946	17.1786	3.5409	2.5236e-15	5.5393e-14
ENSGALG00000005956	935.89	46.5673	4.3289	2.5244e-15	5.5393e-14
ENSGALG00000039539	419.212	43.5954	3.2654	2.5288e-15	5.5438e-14
Novel00340	67.8754	0	Inf	2.5555e-15	5.5974e-14
ENSGALG00000036500	395.542	0	Inf	2.6056e-15	5.7019e-14
ENSGALG00000000625	356.287	1685.95	-2.2424	2.6323e-15	5.7552e-14
Novel03224	188.214	15.6588	3.5873	2.7307e-15	5.965e-14
ENSGALG00000013072	1156.91	150.813	2.9394	2.7385e-15	5.9767e-14
ENSGALG00000011958	348.892	1649.44	-2.2411	2.7455e-15	5.9866e-14
ENSGALG00000020505	209.689	1481.37	-2.8206	2.7636e-15	6.0208e-14
ENSGALG00000030004	2084.36	445.654	2.2256	3.0177e-15	6.5685e-14
ENSGALG00000014788	559.672	98.7834	2.5022	3.0997e-15	6.7409e-14
ENSGALG00000027778	197.875	991.656	-2.3253	3.2625e-15	7.0888e-14
ENSGALG00000014759	37.3893	280.338	-2.9065	3.3964e-15	7.373e-14
ENSGALG00000041596	636.591	112.84	2.4961	3.4152e-15	7.4073e-14
ENSGALG00000001571	165.18	836.832	-2.3409	3.5007e-15	7.586e-14
ENSGALG00000026781	36.2325	281.193	-2.9562	3.5244e-15	7.6306e-14
ENSGALG00000034271	1429.28	306.396	2.2218	3.529e-15	7.6337e-14
Novel01777	580.912	4757.04	-3.0337	3.535e-15	7.6399e-14
ENSGALG00000041988	612.592	13446.7	-4.4562	3.6319e-15	7.8424e-14
ENSGALG00000037536	767.534	145.675	2.3975	3.6417e-15	7.8566e-14
ENSGALG00000032207	12869.1	3009.13	2.0965	3.8223e-15	8.239e-14
ENSGALG00000037735	194.254	17.7291	3.4538	3.9104e-15	8.4215e-14
Novel03287	406.845	43.9611	3.2102	3.9618e-15	8.5247e-14
ENSGALG00000003767	459.964	71.4551	2.6864	4.0363e-15	8.6774e-14
ENSGALG00000003045	1548.14	327.679	2.2402	4.1602e-15	8.9359e-14
ENSGALG00000008916	291.182	2308.84	-2.9872	4.2013e-15	9.0161e-14
ENSGALG00000035599	1974.49	211.895	3.2201	4.2493e-15	9.1111e-14
ENSGALG00000036910	209.821	20.7671	3.3368	4.3651e-15	9.3513e-14
ENSGALG00000023542	2790.08	407.588	2.7751	4.614e-15	9.8758e-14
ENSGALG00000035938	10.4307	161.281	-3.9507	4.8316e-15	1.0333e-13
ENSGALG00000033790	844.627	3696.49	-2.1298	4.8567e-15	1.0377e-13
ENSGALG00000020322	285.975	37.0979	2.9465	4.973e-15	1.0616e-13
ENSGALG00000027355	280.292	33.5836	3.0611	5.03e-15	1.0729e-13
ENSGALG00000042418	306.624	40.4627	2.9218	5.0539e-15	1.077e-13
ENSGALG00000000123	9.21306	440.726	-5.5801	5.1249e-15	1.0912e-13
ENSGALG00000008701	7.62902	126.903	-4.0561	5.1943e-15	1.105e-13
ENSGALG00000030886	54.4141	1230.86	-4.4995	5.2084e-15	1.107e-13
ENSGALG00000012422	26.0213	223.506	-3.1025	5.2374e-15	1.1122e-13
ENSGALG00000000585	568.181	7.68262	6.2086	5.3056e-15	1.1258e-13
ENSGALG00000033532	4119.21	20566	-2.3198	5.3111e-15	1.1259e-13
ENSGALG00000036456	126.902	760.47	-2.5832	5.4267e-15	1.1494e-13
ENSGALG00000012958	119.468	5.88993	4.3422	5.6608e-15	1.198e-13
ENSGALG00000004759	298.548	1435.48	-2.2655	5.7154e-15	1.2085e-13
ENSGALG00000007237	2528.26	567.65	2.1551	5.7542e-15	1.2157e-13
ENSGALG00000002756	392.052	5.50158	6.1551	5.7831e-15	1.2207e-13
ENSGALG00000016609	312.973	43.2321	2.8559	5.8196e-15	1.2273e-13
ENSGALG00000030894	4303.22	50003.1	-3.5385	5.8374e-15	1.23e-13
ENSGALG00000031615	118.565	4.72881	4.6481	5.8576e-15	1.2332e-13
Novel01926	40.3194	1130.59	-4.8095	5.9057e-15	1.2423e-13
ENSGALG00000005814	116.746	902.733	-2.9509	5.9796e-15	1.2567e-13
ENSGALG00000002346	596.309	107.296	2.4745	6.0938e-15	1.2797e-13
ENSGALG00000000769	561.856	104.328	2.4291	6.1756e-15	1.2957e-13
ENSGALG00000008890	130.763	1335.14	-3.352	6.4115e-15	1.344e-13
ENSGALG00000013912	95.3433	0	Inf	6.7014e-15	1.4036e-13
ENSGALG00000038636	506.261	2239.09	-2.145	6.8224e-15	1.4277e-13
ENSGALG00000033420	2878.39	18.9675	7.2456	6.8842e-15	1.4394e-13
ENSGALG00000041154	102.951	3.89561	4.724	6.8911e-15	1.4396e-13
ENSGALG00000010049	268.305	6434.15	-4.5838	6.916e-15	1.4436e-13
Novel01781	768.167	147.576	2.38	6.9861e-15	1.457e-13
ENSGALG00000016707	5.96601	726.547	-6.9281	7.2961e-15	1.5204e-13
ENSGALG00000026154	185.722	911.789	-2.2956	7.3536e-15	1.531e-13
ENSGALG00000032287	3627.97	24289.5	-2.7431	7.3675e-15	1.5326e-13
ENSGALG00000006934	350.562	50.2572	2.8023	7.4529e-15	1.5487e-13
ENSGALG00000039209	590.316	3.01016	7.6155	7.4574e-15	1.5487e-13
ENSGALG00000042117	217.161	1104.19	-2.3462	7.5153e-15	1.5594e-13
ENSGALG00000028560	0.301818	61.2671	-7.6653	7.8733e-15	1.6323e-13
ENSGALG00000032394	3885.23	16305.1	-2.0692	8.0925e-15	1.6763e-13
ENSGALG00000025444	105.666	3.23356	5.0302	8.1404e-15	1.6848e-13
ENSGALG00000026466	12.4581	221.319	-4.151	8.6871e-15	1.7964e-13
ENSGALG00000013822	404.555	4363.44	-3.4311	8.7993e-15	1.8181e-13
ENSGALG00000016323	1101.34	4710.96	-2.0968	8.9513e-15	1.8479e-13
ENSGALG00000011957	1396.2	5871.61	-2.0723	9.1761e-15	1.8927e-13
ENSGALG00000015167	14.3301	298.916	-4.3826	9.3639e-15	1.9293e-13
ENSGALG00000043381	124.621	6.57181	4.2451	9.3694e-15	1.9293e-13
ENSGALG00000034168	1541.54	325.047	2.2457	9.9122e-15	2.0394e-13
ENSGALG00000015689	920.165	3982.04	-2.1135	9.979e-15	2.0514e-13
ENSGALG00000012915	954.811	199.059	2.262	1.0081e-14	2.0706e-13
ENSGALG00000023692	13.0219	159.265	-3.6124	1.0506e-14	2.1561e-13
ENSGALG00000005698	263.876	1236.35	-2.2281	1.0874e-14	2.2297e-13
ENSGALG00000006062	449.217	1996.64	-2.1521	1.095e-14	2.2434e-13
Novel02381	804.531	152.523	2.3991	1.1182e-14	2.289e-13
ENSGALG00000029073	0.301818	535.648	-10.793	1.1334e-14	2.3183e-13
ENSGALG00000035157	502.915	4.794	6.7129	1.1419e-14	2.3337e-13
ENSGALG00000001153	1459.21	276.041	2.4022	1.155e-14	2.3585e-13
ENSGALG00000023243	414.798	1925.76	-2.2149	1.1755e-14	2.3983e-13
ENSGALG00000033178	1089.86	4669.73	-2.0992	1.1949e-14	2.436e-13
ENSGALG00000042789	468.85	80.5748	2.5407	1.2269e-14	2.4991e-13
ENSGALG00000032955	335.884	49.0111	2.7768	1.3073e-14	2.6606e-13
ENSGALG00000028759	120.809	6.73393	4.1651	1.3419e-14	2.7288e-13
ENSGALG00000033453	102.184	569.587	-2.4788	1.3486e-14	2.7401e-13
ENSGALG00000019802	204.684	6.46517	4.9846	1.3851e-14	2.8119e-13
ENSGALG00000003930	352.229	15.6627	4.4911	1.4257e-14	2.8918e-13
ENSGALG00000006051	260.738	32.5124	3.0035	1.4315e-14	2.9013e-13
ENSGALG00000005332	175.651	15.6361	3.4898	1.4737e-14	2.9842e-13
ENSGALG00000006805	124.653	2031.81	-4.0268	1.5357e-14	3.1073e-13
ENSGALG00000016565	64.8259	0	Inf	1.5399e-14	3.1132e-13
ENSGALG00000013042	312.633	1453.91	-2.2174	1.6131e-14	3.2585e-13
ENSGALG00000032544	667.815	3038.27	-2.1857	1.626e-14	3.2819e-13
ENSGALG00000001441	1865.83	7832.07	-2.0696	1.6742e-14	3.3764e-13
ENSGALG00000006802	1464.23	6215.51	-2.0857	1.7276e-14	3.4811e-13
ENSGALG00000024082	300.852	1376.69	-2.1941	1.7394e-14	3.5019e-13
ENSGALG00000034652	32.5064	246.229	-2.9212	1.7484e-14	3.5173e-13
ENSGALG00000005672	70.7688	0.442728	7.3205	1.7747e-14	3.5673e-13
ENSGALG00000030618	4040.58	949.648	2.0891	1.7979e-14	3.6108e-13
ENSGALG00000039376	266.431	1263.58	-2.2457	1.8038e-14	3.6198e-13
ENSGALG00000016448	16.5558	211.614	-3.676	1.816e-14	3.6413e-13
ENSGALG00000002388	2157.4	8961.14	-2.0544	1.8611e-14	3.7287e-13
ENSGALG00000031563	971.402	4234.45	-2.124	1.8699e-14	3.7431e-13
ENSGALG00000004607	5.84185	109.603	-4.2297	1.9569e-14	3.9142e-13
ENSGALG00000008875	179.812	873.466	-2.2803	2.016e-14	4.029e-13
ENSGALG00000029921	3555.96	849.745	2.0651	2.1083e-14	4.2101e-13
ENSGALG00000035016	3020.68	704.976	2.0992	2.1916e-14	4.3728e-13
ENSGALG00000034682	241.553	1085.73	-2.1683	2.3222e-14	4.6295e-13
Novel00982	63.6173	0	Inf	2.3612e-14	4.7034e-13
ENSGALG00000034655	1203.14	194.213	2.6311	2.4115e-14	4.7998e-13
ENSGALG00000010580	251.671	1186.82	-2.2375	2.4261e-14	4.825e-13
ENSGALG00000015628	100.042	0.796518	6.9727	2.4312e-14	4.8311e-13
ENSGALG00000007178	507.753	2261.08	-2.1548	2.5578e-14	5.0745e-13
Novel01983	255.505	26.0185	3.2957	2.5569e-14	5.0745e-13
Novel01947	4.18603	192.87	-5.5259	2.5646e-14	5.0838e-13
ENSGALG00000004448	75.5886	0	Inf	2.578e-14	5.1063e-13
ENSGALG00000038342	0.232046	58.6196	-7.9808	2.7018e-14	5.3471e-13
ENSGALG00000010971	186.744	18.5969	3.3279	2.7087e-14	5.3563e-13
ENSGALG00000003987	566.991	106.729	2.4094	2.7339e-14	5.4019e-13
ENSGALG00000029842	80.3579	459.866	-2.5167	2.8018e-14	5.5316e-13
ENSGALG00000033446	2316.3	9576.67	-2.0477	2.9005e-14	5.7218e-13
ENSGALG00000035120	6.81665	216.909	-4.9919	3.0149e-14	5.9428e-13
ENSGALG00000042638	7.79849	121.324	-3.9595	3.1591e-14	6.222e-13
ENSGALG00000023793	303.805	43.0342	2.8196	3.1725e-14	6.2433e-13
Novel01069	3.14938	87.53	-4.7966	3.1757e-14	6.2446e-13
ENSGALG00000036117	328.744	5051.12	-3.9416	3.1881e-14	6.2638e-13
ENSGALG00000006670	36.8205	3429.54	-6.5414	3.4158e-14	6.7058e-13
ENSGALG00000015235	0.882147	65.2756	-6.2094	3.4217e-14	6.712e-13
Novel02545	728.364	130.186	2.4841	3.4543e-14	6.7705e-13
ENSGALG00000036972	155.001	12.7089	3.6084	3.4868e-14	6.8287e-13
ENSGALG00000019663	212.025	22.8158	3.2161	3.4972e-14	6.8436e-13
ENSGALG00000013060	234.62	28.8175	3.0253	3.5104e-14	6.864e-13
ENSGALG00000035052	110.623	4.92243	4.4901	3.5336e-14	6.9038e-13
ENSGALG00000009050	171.305	9229.88	-5.7517	3.5952e-14	7.0185e-13
ENSGALG00000011646	1.64029	108.068	-6.0419	3.7165e-14	7.2496e-13
ENSGALG00000011176	375.818	60.0607	2.6455	3.897e-14	7.5957e-13
ENSGALG00000005789	3402.51	13995.6	-2.0403	3.9037e-14	7.6026e-13
ENSGALG00000041471	20225.1	5011.25	2.0129	4.0864e-14	7.9521e-13
Novel00337	20.298	1285.75	-5.9851	4.2149e-14	8.1955e-13
ENSGALG00000043829	109.818	1910.87	-4.121	4.489e-14	8.7216e-13
ENSGALG00000035933	73.0338	0.885455	6.366	4.5158e-14	8.7666e-13
Novel01131	539.273	95.1028	2.5035	4.7149e-14	9.1459e-13
ENSGALG00000004778	9.93351	137.832	-3.7945	4.7427e-14	9.1925e-13
ENSGALG00000020895	19.2972	218.883	-3.5037	4.7743e-14	9.2464e-13
ENSGALG00000007665	352.629	55.0504	2.6793	4.7866e-14	9.2629e-13
Novel01209	230.691	29.1938	2.9822	4.823e-14	9.3259e-13
ENSGALG00000031763	363.922	57.4054	2.6644	4.8344e-14	9.3406e-13
ENSGALG00000027472	367.63	1650.38	-2.1665	4.8671e-14	9.3965e-13
ENSGALG00000008546	321.447	1418.11	-2.1413	4.8902e-14	9.4261e-13
ENSGALG00000039051	96.5182	3.53101	4.7726	4.8871e-14	9.4261e-13
ENSGALG00000033677	10307.5	1618.61	2.6709	4.9863e-14	9.6037e-13
ENSGALG00000002645	135.346	9.57311	3.8215	5.0712e-14	9.7596e-13
ENSGALG00000008222	142.069	692.314	-2.2848	5.0855e-14	9.7794e-13
ENSGALG00000030022	515.105	94.1659	2.4516	5.0966e-14	9.7931e-13
ENSGALG00000040586	2798.19	491.886	2.5081	5.1121e-14	9.815e-13
ENSGALG00000034735	645.626	2709.1	-2.069	5.1979e-14	9.972e-13
ENSGALG00000032988	320.355	1381.95	-2.109	5.3078e-14	1.0175e-12
ENSGALG00000017350	2878.8	685.113	2.0711	5.3266e-14	1.0203e-12
Novel00276	103.722	4.35127	4.5751	5.3954e-14	1.0326e-12
ENSGALG00000005854	683.744	2861.7	-2.0653	5.5561e-14	1.0618e-12
ENSGALG00000007716	202.41	939.866	-2.2152	5.5565e-14	1.0618e-12
ENSGALG00000006810	3.94478	97.1734	-4.6225	5.7457e-14	1.0971e-12
ENSGALG00000000902	94.118	3.23356	4.8633	5.8416e-14	1.1146e-12
ENSGALG00000029545	133.579	8.86357	3.9137	5.9458e-14	1.1336e-12
ENSGALG00000002028	267.306	1271.51	-2.25	5.9729e-14	1.1378e-12
ENSGALG00000003196	41.4056	704.132	-4.0879	6.1434e-14	1.1694e-12
ENSGALG00000003911	76.3984	1.11771	6.0949	6.1605e-14	1.1717e-12
ENSGALG00000029072	272.458	38.6264	2.8184	6.3506e-14	1.207e-12
ENSGALG00000014127	5.00632	99.8907	-4.3185	6.4354e-14	1.2221e-12
ENSGALG00000006045	225.228	28.0355	3.0061	6.5673e-14	1.2462e-12
ENSGALG00000042604	331.405	3130.07	-3.2395	6.6016e-14	1.2517e-12
ENSGALG00000023193	459.442	80.6972	2.5093	6.7969e-14	1.2878e-12
ENSGALG00000040832	560.775	6539.41	-3.5437	6.8683e-14	1.3003e-12
ENSGALG00000005094	21.9341	194.99	-3.1521	6.9088e-14	1.307e-12
ENSGALG00000001995	355.912	1590.87	-2.1602	6.95e-14	1.3137e-12
ENSGALG00000030767	148.87	12.0516	3.6268	7.0981e-14	1.3407e-12
ENSGALG00000030741	4.98244	315.562	-5.9849	7.2119e-14	1.3611e-12
ENSGALG00000034916	87.7059	481.953	-2.4581	7.2175e-14	1.3611e-12
ENSGALG00000032702	2881.65	701.763	2.0378	7.2981e-14	1.3753e-12
ENSGALG00000041161	84.0546	2.00317	5.391	7.8197e-14	1.4717e-12
Novel02021	11.2259	142.194	-3.663	7.8221e-14	1.4717e-12
ENSGALG00000015219	104.617	4.72881	4.4675	8.0027e-14	1.5046e-12
ENSGALG00000012761	5.3546	99.996	-4.223	8.0291e-14	1.5084e-12
ENSGALG00000030024	1048.48	4266.72	-2.0248	8.2631e-14	1.5511e-12
ENSGALG00000036133	106.429	1029.6	-3.2741	8.4718e-14	1.5891e-12
ENSGALG00000029617	1820.77	1.97057	9.8517	8.5344e-14	1.5996e-12
ENSGALG00000002562	775.741	3244.89	-2.0645	8.56e-14	1.6032e-12
ENSGALG00000041203	818.003	174.179	2.2315	8.7845e-14	1.6439e-12
ENSGALG00000026716	165.72	15.9947	3.3731	8.8625e-14	1.6566e-12
Novel03086	748.99	3043.27	-2.0226	8.8659e-14	1.6566e-12
ENSGALG00000004393	132.898	648.419	-2.2866	8.9232e-14	1.6661e-12
ENSGALG00000024083	359.821	2932.73	-3.0269	9.1534e-14	1.7078e-12
ENSGALG00000008266	1095.75	239.834	2.1918	9.2319e-14	1.7211e-12
ENSGALG00000015573	164.882	783.526	-2.2485	9.3365e-14	1.7393e-12
ENSGALG00000009450	855.135	8331.7	-3.2844	9.5691e-14	1.7799e-12
Novel01487	51.788	462.683	-3.1593	9.5693e-14	1.7799e-12
ENSGALG00000013037	693.353	2842.12	-2.0353	9.6705e-14	1.7974e-12
Novel01214	65.7728	0.353791	7.5385	9.7165e-14	1.8045e-12
ENSGALG00000009519	234.141	22.4143	3.3849	1.0015e-13	1.8586e-12
ENSGALG00000003473	582.414	74.096	2.9746	1.0034e-13	1.8606e-12
ENSGALG00000017167	145.048	6.89496	4.3948	1.0258e-13	1.9008e-12
ENSGALG00000006390	459.659	1935.44	-2.074	1.0594e-13	1.9615e-12
ENSGALG00000016400	14.2457	146.725	-3.3645	1.0728e-13	1.9849e-12
ENSGALG00000040869	20.7486	192.614	-3.2146	1.1236e-13	2.0772e-12
ENSGALG00000003503	1145.89	258.309	2.1493	1.1718e-13	2.1647e-12
ENSGALG00000037619	67.0373	387.276	-2.5303	1.2154e-13	2.2435e-12
Novel00898	52.7702	325.525	-2.625	1.23e-13	2.2687e-12
ENSGALG00000006123	659.013	133.389	2.3047	1.2485e-13	2.3013e-12
ENSGALG00000002958	103.605	4.56864	4.5032	1.2511e-13	2.3042e-12
ENSGALG00000042721	1450.25	13.4886	6.7484	1.2758e-13	2.3479e-12
ENSGALG00000025862	1067.45	144.768	2.8824	1.3842e-13	2.5437e-12
Novel00894	264.614	38.1592	2.7938	1.4004e-13	2.5715e-12
Novel02295	332.797	53.3809	2.6402	1.4191e-13	2.6039e-12
Novel01247	13.7117	145.761	-3.4101	1.4521e-13	2.6624e-12
Novel02573	1936.87	458.97	2.0773	1.569e-13	2.8724e-12
ENSGALG00000030369	484.99	42.4727	3.5133	1.5859e-13	2.9011e-12
ENSGALG00000031656	420.5	1843.73	-2.1324	1.5986e-13	2.9222e-12
ENSGALG00000015459	550.657	106.23	2.374	1.6274e-13	2.9727e-12
ENSGALG00000011153	843.695	3388.84	-2.006	1.6533e-13	3.0177e-12
ENSGALG00000031606	668.402	138.313	2.2728	1.7008e-13	3.1021e-12
ENSGALG00000006508	98.5928	602.81	-2.6121	1.7273e-13	3.1481e-12
ENSGALG00000031410	69.372	0.707582	6.6153	1.7321e-13	3.1545e-12
ENSGALG00000036502	408.31	1735.1	-2.0873	1.8286e-13	3.3277e-12
ENSGALG00000014912	126.791	824.26	-2.7007	1.8415e-13	3.3462e-12
Novel01154	135.224	668.436	-2.3054	1.8405e-13	3.3462e-12
ENSGALG00000010476	965.654	3885.21	-2.0084	1.8546e-13	3.3675e-12
ENSGALG00000009081	3144.06	27542.5	-3.131	1.8585e-13	3.372e-12
ENSGALG00000026590	27.3516	212.846	-2.9601	1.873e-13	3.396e-12
ENSGALG00000032524	3.00983	82.1264	-4.7701	1.8927e-13	3.429e-12
ENSGALG00000035058	93.6072	3.50727	4.7382	1.9137e-13	3.4645e-12
ENSGALG00000016708	148.852	708.008	-2.2499	1.9197e-13	3.4728e-12
ENSGALG00000012416	147.9	12.7089	3.5407	1.9742e-13	3.5687e-12
ENSGALG00000028250	81.1469	1.64938	5.6205	2.0675e-13	3.7346e-12
ENSGALG00000008139	910.585	3642.38	-2	2.1194e-13	3.8227e-12
ENSGALG00000011990	167.237	961.014	-2.5227	2.1306e-13	3.8402e-12
ENSGALG00000010623	255.437	34.9613	2.8691	2.2122e-13	3.9843e-12
ENSGALG00000000367	90.3131	3.47663	4.6992	2.2808e-13	4.1048e-12
ENSGALG00000019967	269.292	39.5507	2.7674	2.2869e-13	4.1127e-12
ENSGALG00000008098	342.204	1452.08	-2.0852	2.3003e-13	4.1338e-12
ENSGALG00000006502	70.5262	397.23	-2.4937	2.3461e-13	4.2129e-12
ENSGALG00000032245	33.9447	581.392	-4.0983	2.3622e-13	4.2388e-12
Novel01522	17.3236	163.06	-3.2346	2.3822e-13	4.2715e-12
ENSGALG00000016859	12.9258	942.123	-6.1876	2.4232e-13	4.3418e-12
ENSGALG00000043596	1664.76	403.078	2.0462	2.4511e-13	4.3887e-12
Novel00901	1115.37	231.977	2.2655	2.6598e-13	4.7588e-12
ENSGALG00000031862	444.361	32.2674	3.7836	2.7024e-13	4.828e-12
ENSGALG00000041684	227.756	1007.73	-2.1455	2.7092e-13	4.8365e-12
ENSGALG00000030902	2180.63	544.957	2.0005	2.731e-13	4.8719e-12
ENSGALG00000033737	173.41	789.769	-2.1872	2.8497e-13	5.0762e-12
ENSGALG00000005297	727.441	4265.16	-2.5517	2.8576e-13	5.0865e-12
ENSGALG00000016278	469.037	86.7902	2.4341	2.9193e-13	5.1927e-12
ENSGALG00000008256	543.369	106.185	2.3554	3.0139e-13	5.3531e-12
ENSGALG00000026119	443.082	1856.42	-2.0669	3.0812e-13	5.4647e-12
ENSGALG00000011319	787.36	122.841	2.6802	3.0954e-13	5.4859e-12
ENSGALG00000011813	548.739	3229.73	-2.5572	3.1306e-13	5.5442e-12
ENSGALG00000011009	132.749	2.38956	5.7958	3.1427e-13	5.5616e-12
ENSGALG00000007349	72.6673	420.955	-2.5343	3.1602e-13	5.5885e-12
ENSGALG00000009837	425.828	79.9728	2.4127	3.2679e-13	5.7748e-12
ENSGALG00000008747	560.567	105.738	2.4064	3.2956e-13	5.8197e-12
ENSGALG00000006165	69.5786	370.896	-2.4143	3.3313e-13	5.8783e-12
ENSGALG00000037840	883.837	195.327	2.1779	3.3465e-13	5.8967e-12
ENSGALG00000041238	172.784	18.922	3.1908	3.345e-13	5.8967e-12
ENSGALG00000006480	516.382	36.069	3.8396	3.3903e-13	5.9695e-12
ENSGALG00000014892	128.63	629.601	-2.2912	3.4926e-13	6.1408e-12
ENSGALG00000042190	23.1418	189.661	-3.0348	3.5912e-13	6.3096e-12
ENSGALG00000038848	465.387	0.707582	9.3613	3.6255e-13	6.3653e-12
ENSGALG00000004111	3.78351	85.4499	-4.4973	3.6726e-13	6.4435e-12
ENSGALG00000010949	500.771	0	Inf	3.8434e-13	6.7382e-12
Novel02083	0.301818	737.759	-11.255	3.9181e-13	6.8642e-12
ENSGALG00000029422	214.094	12.3531	4.1153	3.9328e-13	6.8851e-12
ENSGALG00000007248	210.904	935.085	-2.1485	3.94e-13	6.8928e-12
ENSGALG00000019741	454.985	85.6365	2.4095	3.9906e-13	6.9763e-12
ENSGALG00000015079	511.282	6.90985	6.2093	3.9976e-13	6.9834e-12
ENSGALG00000032681	362.219	60.6903	2.5773	4.1443e-13	7.2346e-12
Novel02034	145.091	2.81458	5.6879	4.1688e-13	7.2721e-12
ENSGALG00000012756	138.087	11.0101	3.6487	4.1903e-13	7.2993e-12
Novel02930	0.533863	89.9503	-7.3965	4.1895e-13	7.2993e-12
Novel02112	455.317	7189.08	-3.9809	4.2014e-13	7.3133e-12
ENSGALG00000030556	88.2168	0.410131	7.7488	4.3738e-13	7.6026e-12
ENSGALG00000018700	102.776	2353.61	-4.5173	4.4125e-13	7.6644e-12
ENSGALG00000015196	537.089	111.162	2.2725	4.4664e-13	7.7525e-12
ENSGALG00000033753	433.898	1829.27	-2.0758	4.5011e-13	7.8073e-12
ENSGALG00000016693	53.807	317.726	-2.5619	4.5137e-13	7.8235e-12
ENSGALG00000030781	850.69	4249.4	-2.3206	4.6603e-13	8.0719e-12
ENSGALG00000009415	138.846	6.41078	4.4368	4.695e-13	8.1263e-12
ENSGALG00000037152	131.874	607.434	-2.2036	4.8267e-13	8.3483e-12
ENSGALG00000014684	125.059	1433.06	-3.5184	4.8504e-13	8.3833e-12
ENSGALG00000040573	129.412	882.449	-2.7695	4.868e-13	8.4078e-12
ENSGALG00000001028	88.2323	3.20096	4.7847	4.9279e-13	8.4992e-12
ENSGALG00000036073	88760.8	2381.38	5.2201	4.9923e-13	8.6041e-12
ENSGALG00000027835	444.5	85.4962	2.3783	5.0073e-13	8.6239e-12
ENSGALG00000006443	1.43155	65.482	-5.5154	5.2356e-13	9.0108e-12
ENSGALG00000037211	27.7625	206.655	-2.896	5.4773e-13	9.4135e-12
ENSGALG00000026605	279.89	1209.34	-2.1113	5.8001e-13	9.9543e-12
ENSGALG00000006456	196.11	833.076	-2.0868	5.9536e-13	1.0211e-11
ENSGALG00000002113	41.3742	255.019	-2.6238	6.2233e-13	1.0666e-11
ENSGALG00000041729	12.4404	221.172	-4.1521	6.2313e-13	1.0672e-11
ENSGALG00000001375	359.416	1471.57	-2.0336	6.3448e-13	1.0859e-11
ENSGALG00000012075	81.7044	1099.47	-3.7503	6.5537e-13	1.1208e-11
ENSGALG00000003973	998.171	232.031	2.105	6.599e-13	1.1278e-11
ENSGALG00000026276	262.692	2181.18	-3.0537	6.7093e-13	1.1458e-11
ENSGALG00000009042	525.751	28.6037	4.2001	6.8393e-13	1.1664e-11
ENSGALG00000034704	305.267	52.0468	2.5522	7.0246e-13	1.1968e-11
ENSGALG00000034795	76.8426	0	Inf	7.0272e-13	1.1968e-11
ENSGALG00000006260	378.1	3353.75	-3.1489	7.2009e-13	1.2255e-11
ENSGALG00000012618	303.908	50.621	2.5858	7.3137e-13	1.2438e-11
ENSGALG00000000407	51.356	308.809	-2.5881	7.3715e-13	1.2528e-11
ENSGALG00000035476	566.532	96.1675	2.5585	7.5025e-13	1.2742e-11
ENSGALG00000003324	3926.72	198.072	4.3092	7.5422e-13	1.28e-11
ENSGALG00000039801	87.2578	448.08	-2.3604	7.5985e-13	1.2887e-11
ENSGALG00000006631	658.618	140.33	2.2306	7.748e-13	1.3122e-11
ENSGALG00000032530	46.5648	279.375	-2.5849	7.9497e-13	1.3455e-11
ENSGALG00000008734	73.4198	388.696	-2.4044	7.9746e-13	1.3487e-11
ENSGALG00000040855	16.751	155.278	-3.2125	7.9944e-13	1.3511e-11
ENSGALG00000005550	311.12	3906.26	-3.6502	8.0803e-13	1.3638e-11
ENSGALG00000026077	13210.9	2844.53	2.2155	8.2893e-13	1.3971e-11
ENSGALG00000010857	190.364	22.868	3.0574	8.3438e-13	1.4053e-11
ENSGALG00000039595	578.987	85.5942	2.7579	8.4679e-13	1.4252e-11
ENSGALG00000027165	143.853	823.95	-2.518	8.5846e-13	1.4439e-11
ENSGALG00000005467	121.538	1.88163	6.0133	8.5918e-13	1.4441e-11
ENSGALG00000011116	572.837	115.991	2.3041	8.7306e-13	1.4664e-11
Novel01049	190.077	22.359	3.0877	8.9177e-13	1.4968e-11
ENSGALG00000011806	6.91735	166.379	-4.5881	8.9844e-13	1.507e-11
ENSGALG00000013811	616.821	131.585	2.2289	9.1166e-13	1.5281e-11
ENSGALG00000038884	1599.65	9191.51	-2.5225	9.3985e-13	1.5743e-11
ENSGALG00000036836	98.1572	1.41516	6.1161	9.4716e-13	1.5854e-11
ENSGALG00000012975	73.1587	1.68197	5.4428	1.0121e-12	1.6929e-11
ENSGALG00000011299	116.816	8.47914	3.7842	1.0312e-12	1.7237e-11
ENSGALG00000004505	301.539	52.2348	2.5293	1.0344e-12	1.7279e-11
ENSGALG00000037233	127.488	1.17405	6.7627	1.0532e-12	1.7568e-11
ENSGALG00000041413	452.087	1816.68	-2.0066	1.0664e-12	1.7777e-11
Novel02641	2.88626	75.1425	-4.7024	1.1343e-12	1.8883e-11
ENSGALG00000033932	256.077	30749.4	-6.9078	1.1545e-12	1.9207e-11
ENSGALG00000008554	197.431	2.76709	6.1568	1.1715e-12	1.9477e-11
ENSGALG00000005257	180.291	1490.9	-3.0478	1.1807e-12	1.9616e-11
ENSGALG00000039742	314.095	52.4996	2.5808	1.1949e-12	1.9838e-11
ENSGALG00000005808	1156.09	279.229	2.0497	1.2315e-12	2.0433e-11
ENSGALG00000043800	1.75609	69.0411	-5.297	1.2487e-12	2.069e-11
ENSGALG00000006525	329.874	57.2025	2.5278	1.2538e-12	2.0759e-11
ENSGALG00000038502	480.015	97.2948	2.3026	1.2963e-12	2.1434e-11
ENSGALG00000039099	243.727	1035.87	-2.0875	1.2957e-12	2.1434e-11
ENSGALG00000039428	846.085	191.902	2.1404	1.3066e-12	2.1591e-11
ENSGALG00000014943	87.681	3.70889	4.5632	1.3532e-12	2.2345e-11
Novel02473	15411.1	236.505	6.026	1.3826e-12	2.2815e-11
ENSGALG00000036873	422.064	1708.54	-2.0172	1.442e-12	2.3779e-11
ENSGALG00000000783	16.6358	153.202	-3.2031	1.467e-12	2.4174e-11
ENSGALG00000037665	112.727	7.64807	3.8816	1.4801e-12	2.4374e-11
ENSGALG00000001006	264.751	40.5151	2.7081	1.4826e-12	2.4399e-11
ENSGALG00000014729	211.722	28.5129	2.8925	1.5342e-12	2.5213e-11
ENSGALG00000009641	346702	18308.5	4.2431	1.5364e-12	2.5234e-11
ENSGALG00000027069	627.009	3715.11	-2.5668	1.583e-12	2.5981e-11
ENSGALG00000032874	115.478	8.14714	3.8252	1.5996e-12	2.6236e-11
ENSGALG00000042568	290.84	48.0644	2.5972	1.6041e-12	2.6291e-11
ENSGALG00000032071	80.1556	1.5041	5.7358	1.6058e-12	2.6302e-11
ENSGALG00000012577	129.665	637.272	-2.2971	1.6149e-12	2.6434e-11
ENSGALG00000043511	517.679	108.114	2.2595	1.6246e-12	2.6575e-11
ENSGALG00000039634	178.855	21.8175	3.0352	1.6325e-12	2.6685e-11
ENSGALG00000031638	360.826	64.4723	2.4846	1.6682e-12	2.7251e-11
ENSGALG00000026332	140.193	13.1041	3.4193	1.6755e-12	2.7352e-11
ENSGALG00000012004	253.797	39.9783	2.6664	1.694e-12	2.7636e-11
ENSGALG00000033416	626.268	104.649	2.5812	1.7e-12	2.7714e-11
ENSGALG00000033203	904.497	4768.39	-2.3983	1.74e-12	2.8329e-11
ENSGALG00000017154	34.1445	225.059	-2.7206	1.742e-12	2.8343e-11
ENSGALG00000042543	1795.76	335.98	2.4181	1.84e-12	2.9917e-11
ENSGALG00000015706	301.163	1219.45	-2.0176	1.9239e-12	3.1219e-11
ENSGALG00000042134	1256.43	161.933	2.9559	1.9467e-12	3.1569e-11
ENSGALG00000020057	327.331	1310.35	-2.0011	2.0161e-12	3.265e-11
ENSGALG00000041192	57.1563	676.65	-3.5654	2.071e-12	3.345e-11
ENSGALG00000026038	181.06	21.6051	3.067	2.1456e-12	3.4633e-11
ENSGALG00000004515	772.661	175.959	2.1346	2.1685e-12	3.4957e-11
ENSGALG00000002546	33280.7	7064.84	2.236	2.1827e-12	3.5162e-11
ENSGALG00000009433	1313.14	11034.6	-3.0709	2.2032e-12	3.547e-11
ENSGALG00000042587	69.2896	356.174	-2.3619	2.2293e-12	3.5865e-11
ENSGALG00000007645	83.7255	563.467	-2.7506	2.2717e-12	3.6523e-11
ENSGALG00000042263	7.8146	106.484	-3.7683	2.32e-12	3.7276e-11
ENSGALG00000010669	342.491	61.6608	2.4736	2.3594e-12	3.7883e-11
ENSGALG00000029606	32.4206	6806.85	-7.7139	2.3979e-12	3.8476e-11
ENSGALG00000026167	122.446	556.693	-2.1847	2.4417e-12	3.9153e-11
ENSGALG00000003972	25.0917	187.844	-2.9042	2.4927e-12	3.9945e-11
ENSGALG00000013980	117.17	544.457	-2.2162	2.6175e-12	4.189e-11
ENSGALG00000009731	648.543	142.754	2.1837	2.6356e-12	4.2153e-11
ENSGALG00000011796	109.762	7.44841	3.8813	2.646e-12	4.2268e-11
ENSGALG00000025788	229.684	1006.91	-2.1322	2.6463e-12	4.2268e-11
ENSGALG00000033872	151.469	0.353791	8.7419	2.7655e-12	4.4144e-11
ENSGALG00000003588	114.113	8.4554	3.7544	2.8994e-12	4.625e-11
ENSGALG00000026187	2.27442	70.7465	-4.9591	2.9062e-12	4.6317e-11
Novel02824	358.645	31.276	3.5194	2.9074e-12	4.6317e-11
ENSGALG00000032313	2759.84	319.701	3.1098	2.9307e-12	4.6658e-11
ENSGALG00000015884	586.705	127.531	2.2018	2.935e-12	4.6696e-11
ENSGALG00000028900	585.246	128.722	2.1848	2.9692e-12	4.721e-11
ENSGALG00000002675	308.486	10.1741	4.9222	3.0698e-12	4.8777e-11
ENSGALG00000008702	73.6307	2.08325	5.1434	3.0889e-12	4.905e-11
ENSGALG00000027658	197.338	853.083	-2.112	3.0915e-12	4.9059e-11
ENSGALG00000013481	2.72355	72.1304	-4.727	3.1927e-12	5.0533e-11
ENSGALG00000032222	553.988	119.864	2.2085	3.1925e-12	5.0533e-11
ENSGALG00000010182	555.397	2461.66	-2.148	3.2677e-12	5.1653e-11
ENSGALG00000007409	72.0887	435.059	-2.5934	3.2702e-12	5.1659e-11
ENSGALG00000003886	199.224	2213.13	-3.4736	3.3631e-12	5.3092e-11
ENSGALG00000041299	467.564	97.2138	2.2659	3.3714e-12	5.3188e-11
ENSGALG00000034109	272.733	46.9575	2.5381	3.5206e-12	5.5471e-11
ENSGALG00000014686	1761.34	16.7586	6.7156	3.5301e-12	5.5585e-11
ENSGALG00000009755	915.22	175.49	2.3827	3.5379e-12	5.5671e-11
ENSGALG00000008120	984.891	241.427	2.0284	3.6647e-12	5.7593e-11
ENSGALG00000009405	65.9067	1.06137	5.9564	3.6918e-12	5.7981e-11
ENSGALG00000002223	102.828	0	Inf	3.6996e-12	5.8067e-11
ENSGALG00000003146	157.109	18.1235	3.1158	3.9263e-12	6.1545e-11
ENSGALG00000036599	28.2483	265.354	-3.2317	3.955e-12	6.1915e-11
ENSGALG00000006942	143.145	619.801	-2.1143	3.9952e-12	6.2426e-11
ENSGALG00000021025	57.7772	0.410131	7.1383	3.998e-12	6.2429e-11
ENSGALG00000008383	211.219	28.8559	2.8718	4.0595e-12	6.3348e-11
ENSGALG00000007412	301.795	50.715	2.5731	4.1791e-12	6.5133e-11
ENSGALG00000023444	57.0231	0.442728	7.009	4.1896e-12	6.5254e-11
ENSGALG00000030687	497.243	8.61557	5.8509	4.544e-12	7.0594e-11
ENSGALG00000006588	107.394	7.59369	3.822	4.5593e-12	7.0787e-11
ENSGALG00000009562	187.061	1.97057	6.5688	4.6456e-12	7.2035e-11
ENSGALG00000013594	831.284	201.698	2.0431	4.655e-12	7.2134e-11
ENSGALG00000000589	45.8105	267.77	-2.5472	4.7259e-12	7.3188e-11
ENSGALG00000027420	170.497	2219.53	-3.7024	4.8929e-12	7.5581e-11
ENSGALG00000042932	142.714	14.6469	3.2845	4.9454e-12	7.6297e-11
ENSGALG00000011291	181.196	2445.21	-3.7543	4.9677e-12	7.6592e-11
ENSGALG00000042670	2133.69	40.2086	5.7297	4.9837e-12	7.6789e-11
ENSGALG00000038543	15.2746	186.946	-3.6134	5.0251e-12	7.7379e-11
ENSGALG00000012662	279.154	1123.51	-2.0089	5.2632e-12	8.0943e-11
ENSGALG00000007257	316.437	3.73953	6.4029	5.6484e-12	8.6703e-11
ENSGALG00000043743	174.392	754.468	-2.1131	5.8789e-12	9.0185e-11
ENSGALG00000000529	1428.48	179.451	2.9928	6.1868e-12	9.467e-11
ENSGALG00000034020	829.281	198.887	2.0599	6.2094e-12	9.4956e-11
ENSGALG00000000731	46.7967	265.284	-2.5031	6.2507e-12	9.5529e-11
ENSGALG00000043661	84.8067	398.541	-2.2325	6.2679e-12	9.5731e-11
ENSGALG00000005400	152.738	14.9245	3.3553	6.2783e-12	9.5831e-11
ENSGALG00000014982	748.648	173.21	2.1118	6.4004e-12	9.7633e-11
ENSGALG00000029230	286.762	44.1379	2.6998	6.626e-12	1.0101e-10
ENSGALG00000015179	432.127	88.1428	2.2935	6.7697e-12	1.0314e-10
ENSGALG00000029301	321.922	17.9851	4.1618	6.8657e-12	1.0447e-10
ENSGALG00000005857	33.5072	268.982	-3.005	6.8981e-12	1.0483e-10
ENSGALG00000029954	988.333	242.502	2.027	6.9149e-12	1.0502e-10
ENSGALG00000021220	42.1667	252.161	-2.5802	6.9914e-12	1.0612e-10
ENSGALG00000014121	1549.76	7165.37	-2.209	7.0696e-12	1.0717e-10
ENSGALG00000009722	257.558	16.9978	3.9215	7.1483e-12	1.083e-10
ENSGALG00000032452	154.839	669.049	-2.1113	7.6913e-12	1.1624e-10
ENSGALG00000036160	14.2581	138.58	-3.2809	7.8228e-12	1.1815e-10
ENSGALG00000015729	885.944	210.684	2.0721	7.9583e-12	1.2005e-10
ENSGALG00000004221	187.437	24.9493	2.9093	8.1452e-12	1.2272e-10
ENSGALG00000019755	7.09516	118.857	-4.0663	8.4143e-12	1.2669e-10
ENSGALG00000007932	137.399	590.134	-2.1027	8.5419e-12	1.2853e-10
Novel02874	96.3376	6.22601	3.9517	8.8596e-12	1.3299e-10
ENSGALG00000039081	83.864	418.241	-2.3182	8.8672e-12	1.3302e-10
ENSGALG00000026422	49.2199	699.589	-3.8292	9.0138e-12	1.3513e-10
ENSGALG00000011008	244.398	40.3817	2.5975	9.3305e-12	1.3971e-10
ENSGALG00000025743	648.729	153.183	2.0824	9.3785e-12	1.4034e-10
ENSGALG00000032023	105.716	6.20916	4.0896	9.6508e-12	1.4433e-10
ENSGALG00000010825	73.0865	2.3807	4.9401	9.9575e-12	1.4864e-10
ENSGALG00000034303	178.396	931.419	-2.3843	1.0249e-11	1.5281e-10
ENSGALG00000020876	53.4934	292.637	-2.4517	1.0291e-11	1.5335e-10
ENSGALG00000006527	0.526095	50.3807	-6.5814	1.0301e-11	1.534e-10
ENSGALG00000004597	213.025	962.463	-2.1757	1.0345e-11	1.5387e-10
ENSGALG00000039219	563.265	70.458	2.999	1.0352e-11	1.5388e-10
ENSGALG00000012089	76.4944	2.26802	5.0758	1.0814e-11	1.6065e-10
ENSGALG00000043690	5685.64	1149.6	2.3062	1.0865e-11	1.6121e-10
ENSGALG00000036447	539.451	123.14	2.1312	1.1023e-11	1.6336e-10
ENSGALG00000016173	1.65583	79.4887	-5.5851	1.141e-11	1.6889e-10
ENSGALG00000013776	238.649	38.6197	2.6275	1.1837e-11	1.75e-10
ENSGALG00000033971	823.378	120.015	2.7783	1.2217e-11	1.805e-10
Novel02265	14.7114	126.014	-3.0986	1.2275e-11	1.8124e-10
Novel01211	335.33	2.00317	7.3872	1.2362e-11	1.8242e-10
ENSGALG00000008368	689.687	166.516	2.0503	1.2447e-11	1.8357e-10
ENSGALG00000041918	463.211	1.23925	8.5461	1.2796e-11	1.886e-10
ENSGALG00000010170	658.369	75.693	3.1207	1.3355e-11	1.9671e-10
Novel01287	155.19	645.278	-2.0559	1.3387e-11	1.9695e-10
Novel01924	153.941	18.0414	3.093	1.3379e-11	1.9695e-10
ENSGALG00000012275	210.415	845.972	-2.0074	1.37e-11	2.012e-10
ENSGALG00000009759	69.7976	1223.41	-4.1316	1.4574e-11	2.1352e-10
ENSGALG00000042866	20.3035	156.295	-2.9445	1.4669e-11	2.1465e-10
ENSGALG00000035099	501.987	60.5571	3.0513	1.5422e-11	2.254e-10
ENSGALG00000028770	117.734	10.5387	3.4818	1.581e-11	2.3093e-10
ENSGALG00000012470	115.611	2.32436	5.6363	1.6139e-11	2.3559e-10
ENSGALG00000003160	91.5156	434.434	-2.247	1.6496e-11	2.4066e-10
ENSGALG00000039837	165.083	17.325	3.2523	1.7027e-11	2.4796e-10
ENSGALG00000001956	4394.6	837.917	2.3909	1.7214e-11	2.5039e-10
ENSGALG00000013568	30.8265	9083.39	-8.2029	1.7624e-11	2.5619e-10
ENSGALG00000038688	1027.44	42.8514	4.5836	1.785e-11	2.5932e-10
ENSGALG00000037875	1.23	57.017	-5.5347	1.7866e-11	2.5941e-10
ENSGALG00000024449	450.728	1969.53	-2.1275	1.7956e-11	2.6056e-10
ENSGALG00000030151	111.591	9.52281	3.5507	1.7986e-11	2.6084e-10
Novel01899	58.3564	0.885455	6.0423	1.8037e-11	2.6126e-10
ENSGALG00000008861	71.1747	2.4133	4.8823	1.8409e-11	2.6651e-10
ENSGALG00000012586	151.655	632.269	-2.0597	1.8804e-11	2.7205e-10
ENSGALG00000016397	501.326	108.298	2.2107	1.9435e-11	2.8069e-10
ENSGALG00000039121	129.331	559.808	-2.1139	1.943e-11	2.8069e-10
ENSGALG00000002111	59.6455	328.32	-2.4606	1.9989e-11	2.8835e-10
ENSGALG00000010342	8.78234	102.405	-3.5435	2.0121e-11	2.9008e-10
ENSGALG00000010377	70.4665	0	Inf	2.0174e-11	2.9067e-10
ENSGALG00000016875	89.2091	412.897	-2.2105	2.0299e-11	2.9212e-10
ENSGALG00000041047	5.74935	112.36	-4.2886	2.0476e-11	2.9433e-10
ENSGALG00000011347	128.146	11.5191	3.4757	2.0995e-11	3.0143e-10
ENSGALG00000029734	57.7982	0.796518	6.1812	2.1518e-11	3.0858e-10
ENSGALG00000011562	41.2837	243.127	-2.5581	2.1909e-11	3.14e-10
ENSGALG00000036513	156.807	869.858	-2.4718	2.2097e-11	3.1651e-10
ENSGALG00000026499	6.08944	296.92	-5.6076	2.3178e-11	3.318e-10
ENSGALG00000034132	191.669	28.7008	2.7395	2.3456e-11	3.3558e-10
ENSGALG00000043377	4375.42	79.5853	5.7808	2.3801e-11	3.4032e-10
ENSGALG00000035729	288.398	1295.6	-2.1675	2.3854e-11	3.4087e-10
Novel02520	414.151	8069.72	-4.2843	2.4766e-11	3.535e-10
Novel02031	404.927	85.0232	2.2517	2.6155e-11	3.7245e-10
ENSGALG00000012710	299.381	54.9178	2.4466	2.6426e-11	3.761e-10
ENSGALG00000024049	108.707	8.72221	3.6396	2.726e-11	3.8751e-10
ENSGALG00000013035	43.6477	734.613	-4.073	2.7279e-11	3.8756e-10
ENSGALG00000009082	1264.21	29149	-4.5271	2.8051e-11	3.9806e-10
ENSGALG00000011076	81.4102	385.608	-2.2439	2.8919e-11	4.0991e-10
Novel02429	12.7568	124.866	-3.291	3.0177e-11	4.2748e-10
ENSGALG00000009016	331.867	65.9743	2.3306	3.0542e-11	4.3216e-10
Novel01381	0.232046	117.08	-8.9789	3.0542e-11	4.3216e-10
ENSGALG00000036798	4813.65	34358.6	-2.8355	3.0691e-11	4.3401e-10
ENSGALG00000006658	326.775	64.7152	2.3361	3.0982e-11	4.3787e-10
ENSGALG00000033919	58.6879	313.888	-2.4191	3.1056e-11	4.3866e-10
ENSGALG00000004859	208.078	1345.7	-2.6932	3.1611e-11	4.4625e-10
ENSGALG00000025181	118.04	500.957	-2.0854	3.3546e-11	4.7246e-10
ENSGALG00000036422	1.95764	60.0123	-4.9381	3.6542e-11	5.1378e-10
ENSGALG00000039238	426.168	44.6377	3.2551	3.7671e-11	5.2935e-10
ENSGALG00000001645	274.92	1485.64	-2.434	3.8508e-11	5.408e-10
ENSGALG00000003720	392.383	86.1079	2.188	3.8762e-11	5.4405e-10
ENSGALG00000009495	2187.82	35.0906	5.9623	3.9099e-11	5.4847e-10
ENSGALG00000015538	922.698	3785.99	-2.0367	4.0323e-11	5.6531e-10
ENSGALG00000023821	26.5169	176.947	-2.7383	4.2352e-11	5.9239e-10
ENSGALG00000016388	8.80479	1595.47	-7.5015	4.4168e-11	6.1678e-10
Novel03199	129.851	14.2218	3.1907	4.6669e-11	6.5055e-10
ENSGALG00000014883	297.258	40.4361	2.878	4.7158e-11	6.5699e-10
ENSGALG00000040972	239.328	41.5519	2.526	4.7606e-11	6.6248e-10
ENSGALG00000030101	63.1381	1.56044	5.3385	4.8045e-11	6.6781e-10
ENSGALG00000009424	365.316	77.8977	2.2295	4.8323e-11	6.713e-10
ENSGALG00000005792	95.0839	420.604	-2.1452	4.8353e-11	6.7133e-10
ENSGALG00000013569	5457.68	1055.89	2.3698	5.2673e-11	7.2801e-10
ENSGALG00000014934	37.4654	307.541	-3.0371	5.3275e-11	7.359e-10
ENSGALG00000037414	91.0137	406.359	-2.1586	5.371e-11	7.4149e-10
ENSGALG00000043089	301.718	22.1456	3.7681	5.3778e-11	7.4202e-10
ENSGALG00000043603	0.301818	85.3799	-8.1441	5.6829e-11	7.8102e-10
ENSGALG00000034214	78.5778	1.20665	6.025	6.3235e-11	8.6613e-10
ENSGALG00000028608	78.6077	465.069	-2.5647	6.3827e-11	8.7376e-10
ENSGALG00000031826	2049.55	37505.1	-4.1937	6.4739e-11	8.8525e-10
ENSGALG00000041204	578.387	138.51	2.062	6.5581e-11	8.9576e-10
ENSGALG00000016459	152.198	19.8469	2.939	6.6927e-11	9.1312e-10
ENSGALG00000027961	84.6647	767.201	-3.1798	6.7697e-11	9.2312e-10
ENSGALG00000041804	149.151	18.8943	2.9808	6.7827e-11	9.2437e-10
ENSGALG00000040023	559.17	89.4868	2.6435	6.8739e-11	9.3628e-10
ENSGALG00000034511	120.27	491.605	-2.0312	7.0988e-11	9.6529e-10
Novel00501	403.495	87.5863	2.2038	7.1351e-11	9.6915e-10
ENSGALG00000039652	125.459	529.854	-2.0784	7.2158e-11	9.7957e-10
Novel01202	13.4487	118.208	-3.1358	7.2387e-11	9.8213e-10
ENSGALG00000037206	113.426	469.025	-2.0479	7.3335e-11	9.9444e-10
ENSGALG00000005644	58.8659	482.419	-3.0348	7.5301e-11	1.02e-09
ENSGALG00000034159	58.1999	1.17405	5.6314	7.8278e-11	1.0597e-09
ENSGALG00000005266	656.576	156.809	2.066	7.8919e-11	1.0678e-09
ENSGALG00000010859	92.4113	6.89496	3.7445	7.9783e-11	1.0783e-09
ENSGALG00000042375	113.45	11.4004	3.3149	8.0949e-11	1.0922e-09
ENSGALG00000002452	177.817	3362.42	-4.241	8.2975e-11	1.118e-09
ENSGALG00000004376	212.22	1096.42	-2.3692	8.2996e-11	1.118e-09
ENSGALG00000034534	154.933	20.526	2.9161	8.3512e-11	1.1231e-09
ENSGALG00000008018	515.807	124.986	2.0451	8.4437e-11	1.1349e-09
ENSGALG00000031164	84.6352	0.885455	6.5787	8.6472e-11	1.1616e-09
ENSGALG00000032239	366.563	12.3965	4.8861	8.7293e-11	1.1714e-09
ENSGALG00000004257	93.5097	413.617	-2.1451	8.7729e-11	1.1762e-09
ENSGALG00000039687	67.1915	2.34811	4.8387	9.1208e-11	1.2219e-09
ENSGALG00000012595	64.0443	1056.06	-4.0435	9.1283e-11	1.2222e-09
ENSGALG00000026677	377.07	24.5837	3.9391	9.4592e-11	1.2644e-09
ENSGALG00000038649	248.984	45.2431	2.4603	9.5495e-11	1.2758e-09
ENSGALG00000041626	435.198	95.9421	2.1814	9.6851e-11	1.2925e-09
Novel00047	3.90651	175.377	-5.4884	9.8113e-11	1.3086e-09
Novel03014	170.238	23.9689	2.8283	9.8755e-11	1.3165e-09
ENSGALG00000011917	800.138	3309.64	-2.0484	1.0204e-10	1.3588e-09
ENSGALG00000034232	138.395	17.1105	3.0158	1.0229e-10	1.3613e-09
ENSGALG00000010029	23.7594	2287.75	-6.5893	1.0453e-10	1.3882e-09
ENSGALG00000005207	409.589	13791.1	-5.0734	1.0853e-10	1.4402e-09
ENSGALG00000006511	20.7608	175.886	-3.0827	1.0857e-10	1.4402e-09
ENSGALG00000013086	29.4013	181.178	-2.6235	1.0906e-10	1.4452e-09
ENSGALG00000033428	1151.4	221.558	2.3776	1.09e-10	1.4452e-09
ENSGALG00000011113	66.5957	2.47849	4.7479	1.0948e-10	1.4499e-09
ENSGALG00000026301	211.55	35.6482	2.5691	1.1299e-10	1.4938e-09
ENSGALG00000036649	213.869	38.0328	2.4914	1.145e-10	1.5123e-09
ENSGALG00000033643	210.353	35.5463	2.565	1.1789e-10	1.5563e-09
ENSGALG00000020975	19.7797	277.798	-3.8119	1.1995e-10	1.5809e-09
Novel00578	127.476	14.4709	3.139	1.224e-10	1.6115e-09
ENSGALG00000036071	2.34477	59.0645	-4.6548	1.2298e-10	1.6182e-09
ENSGALG00000034107	504.985	10770.8	-4.4147	1.2375e-10	1.6275e-09
ENSGALG00000005031	26.0698	162.92	-2.6437	1.2606e-10	1.6569e-09
ENSGALG00000004146	27.4494	177.316	-2.6915	1.2904e-10	1.6953e-09
ENSGALG00000029569	4.85124	157.18	-5.0179	1.3018e-10	1.7093e-09
ENSGALG00000040369	94.1452	2212.16	-4.5544	1.3544e-10	1.7745e-09
ENSGALG00000029547	3.29669	64.7845	-4.2966	1.364e-10	1.7862e-09
ENSGALG00000004958	96.5857	409.744	-2.0848	1.3716e-10	1.7942e-09
Novel01174	722.121	162.295	2.1536	1.4123e-10	1.8434e-09
ENSGALG00000010478	257.322	49.3431	2.3827	1.4243e-10	1.858e-09
ENSGALG00000039821	103.309	526.137	-2.3485	1.4256e-10	1.858e-09
ENSGALG00000039344	418.719	1.06137	8.6239	1.4295e-10	1.8619e-09
Novel00419	101.167	449.64	-2.152	1.4811e-10	1.925e-09
ENSGALG00000001662	69.0515	2.71075	4.6709	1.5586e-10	2.0225e-09
Novel02793	273.733	18.4999	3.8872	1.655e-10	2.143e-09
ENSGALG00000035831	263.246	52.1419	2.3359	1.6792e-10	2.1732e-09
ENSGALG00000039622	289.046	58.8273	2.2967	1.6889e-10	2.1847e-09
ENSGALG00000036853	456.844	4489.18	-3.2967	1.7073e-10	2.205e-09
ENSGALG00000005413	442.949	1.23925	8.4815	1.7118e-10	2.2096e-09
ENSGALG00000012155	64.2726	802.894	-3.6429	1.7216e-10	2.2211e-09
ENSGALG00000009037	149.439	5.33452	4.8081	1.7571e-10	2.2633e-09
ENSGALG00000000913	1084.27	119.804	3.178	1.7616e-10	2.2679e-09
ENSGALG00000006647	210.854	2826.87	-3.7449	1.8195e-10	2.3412e-09
ENSGALG00000039390	78.0016	4.09332	4.2522	1.836e-10	2.3612e-09
ENSGALG00000037129	69.2421	314.839	-2.1849	1.8972e-10	2.436e-09
ENSGALG00000002082	431.271	3292.21	-2.9324	1.9178e-10	2.4613e-09
Novel02486	72.9868	3.35314	4.4441	1.9237e-10	2.4674e-09
ENSGALG00000014569	98.5656	4245	-5.4285	1.9278e-10	2.4702e-09
ENSGALG00000042914	168.562	863.223	-2.3565	1.9396e-10	2.4839e-09
Novel01823	86.0851	5.77529	3.8978	1.9493e-10	2.495e-09
ENSGALG00000016094	181.598	27.9515	2.6997	1.9723e-10	2.5232e-09
ENSGALG00000031617	315.327	65.2052	2.2738	1.9783e-10	2.5295e-09
ENSGALG00000016934	68.2778	2.87092	4.5718	2.0003e-10	2.5563e-09
ENSGALG00000023266	193.248	28.3519	2.7689	2.0253e-10	2.5869e-09
ENSGALG00000001141	53.4978	0.885455	5.9169	2.0327e-10	2.595e-09
ENSGALG00000002353	368.418	82.6837	2.1557	2.1448e-10	2.7324e-09
ENSGALG00000012544	633.097	74.9386	3.0786	2.3359e-10	2.9727e-09
ENSGALG00000012730	48.6692	246.633	-2.3413	2.3579e-10	2.9961e-09
ENSGALG00000043737	0.464091	182.5	-8.6193	2.3616e-10	2.9993e-09
ENSGALG00000041236	45.5969	231.925	-2.3467	2.3946e-10	3.0395e-09
ENSGALG00000036395	2.5302	308.477	-6.9298	2.4329e-10	3.0849e-09
ENSGALG00000028871	241.507	4174.53	-4.1115	2.4898e-10	3.1521e-09
ENSGALG00000006415	1.18397	53.2173	-5.4902	2.5836e-10	3.2659e-09
ENSGALG00000004814	153.29	20.9281	2.8727	2.7094e-10	3.4195e-09
ENSGALG00000016446	203.928	36.6008	2.4781	2.7637e-10	3.4864e-09
ENSGALG00000001282	37.0246	202.547	-2.4517	2.8236e-10	3.5545e-09
Novel01201	2.01188	55.0376	-4.7738	2.885e-10	3.6262e-09
ENSGALG00000008444	3412.77	157.702	4.4357	2.947e-10	3.7023e-09
ENSGALG00000041900	366.782	81.6569	2.1673	2.9885e-10	3.7525e-09
ENSGALG00000005842	91.176	0	Inf	3.0586e-10	3.8369e-09
ENSGALG00000039264	23.1128	265.741	-3.5233	3.0589e-10	3.8369e-09
ENSGALG00000009172	91.8133	380.997	-2.053	3.0913e-10	3.8756e-09
ENSGALG00000041295	50.0358	640.825	-3.6789	3.1729e-10	3.9717e-09
ENSGALG00000016834	305.86	1930.46	-2.658	3.177e-10	3.9749e-09
ENSGALG00000004852	1462.86	306.209	2.2562	3.3404e-10	4.1665e-09
Novel01533	42.3468	0	Inf	3.5331e-10	4.4046e-09
ENSGALG00000039054	0.526095	47.2592	-6.4891	3.5586e-10	4.4341e-09
ENSGALG00000001916	1050.38	127.209	3.0456	3.6618e-10	4.5581e-09
ENSGALG00000034041	333.687	73.176	2.1891	3.6653e-10	4.5601e-09
ENSGALG00000016464	207.766	38.3717	2.4368	3.7508e-10	4.6617e-09
ENSGALG00000023083	23.6544	150.862	-2.673	3.7579e-10	4.6681e-09
ENSGALG00000012712	4855.92	19457.2	-2.0025	3.7735e-10	4.6851e-09
ENSGALG00000035867	54.6967	1.20665	5.5024	3.8222e-10	4.7432e-09
Novel03160	20.381	139.17	-2.7715	3.8915e-10	4.8267e-09
Novel03023	422.333	15.5718	4.7614	3.9466e-10	4.8926e-09
ENSGALG00000004267	42.0992	0	Inf	3.9897e-10	4.9435e-09
ENSGALG00000012545	45.3456	218.852	-2.2709	4.0412e-10	5.0022e-09
ENSGALG00000023420	209.778	36.6737	2.516	4.0398e-10	5.0022e-09
Novel01250	302.656	0.820262	8.5274	4.0572e-10	5.0195e-09
ENSGALG00000007441	51.1617	0.852859	5.9066	4.0717e-10	5.0323e-09
ENSGALG00000015008	18.5624	634.255	-5.0946	4.1161e-10	5.0821e-09
ENSGALG00000040397	187.166	32.033	2.5467	4.1339e-10	5.1014e-09
ENSGALG00000036547	97.6164	398.637	-2.0299	4.1379e-10	5.1038e-09
Novel01302	0.897685	58.3203	-6.0216	4.1705e-10	5.1388e-09
ENSGALG00000007364	847.115	9089.33	-3.4235	4.3642e-10	5.3721e-09
ENSGALG00000033051	210.147	1176.72	-2.4853	4.422e-10	5.4405e-09
Novel01783	11.1568	104.139	-3.2225	4.4704e-10	5.4973e-09
ENSGALG00000012454	73.4284	319.232	-2.1202	4.4866e-10	5.5145e-09
ENSGALG00000016615	98.1592	0.442728	7.7926	4.527e-10	5.5557e-09
Novel01579	19.0447	435.739	-4.516	4.5268e-10	5.5557e-09
ENSGALG00000036387	7.9225	90.6883	-3.5169	4.5673e-10	5.6023e-09
Novel00750	41.574	211.176	-2.3447	4.6714e-10	5.7243e-09
ENSGALG00000023546	467.83	114.725	2.0278	4.7967e-10	5.869e-09
ENSGALG00000040363	253.387	1979.48	-2.9657	4.8758e-10	5.9539e-09
Novel02684	304.637	64.5395	2.2388	4.885e-10	5.9621e-09
ENSGALG00000002367	114.567	1.15031	6.638	5.2754e-10	6.4194e-09
ENSGALG00000016803	214.947	40.7681	2.3985	5.3355e-10	6.4892e-09
ENSGALG00000029520	51.4862	562.074	-3.4485	5.3553e-10	6.5101e-09
ENSGALG00000018288	2.15818	91.3626	-5.4037	5.3924e-10	6.5519e-09
ENSGALG00000014984	238.464	48.3746	2.3015	5.5773e-10	6.7732e-09
ENSGALG00000006138	54.4561	317.294	-2.5427	5.8484e-10	7.0848e-09
ENSGALG00000032558	109.708	11.8472	3.2111	5.9866e-10	7.2451e-09
ENSGALG00000026316	106.801	11.101	3.2662	6.2076e-10	7.5013e-09
ENSGALG00000002403	333.501	1626.84	-2.2863	6.2687e-10	7.5715e-09
ENSGALG00000007706	53.2262	1.32818	5.3246	6.408e-10	7.7358e-09
Novel00472	93.7849	8.15599	3.5234	6.4117e-10	7.7365e-09
ENSGALG00000015519	419.338	13.5529	4.9514	6.4638e-10	7.7955e-09
Novel01992	28.5422	438.369	-3.941	6.5761e-10	7.927e-09
ENSGALG00000034716	168.982	26.5573	2.6697	7.2705e-10	8.7338e-09
ENSGALG00000007507	186.607	27.5168	2.7616	7.2924e-10	8.7516e-09
ENSGALG00000027853	863.681	113.269	2.9307	7.292e-10	8.7516e-09
ENSGALG00000012456	92.8918	499.426	-2.4266	7.6038e-10	9.1164e-09
ENSGALG00000015141	8.06262	87.4784	-3.4396	7.845e-10	9.3917e-09
ENSGALG00000030647	5535.62	113.061	5.6136	7.8592e-10	9.4007e-09
ENSGALG00000038559	2.07388	124.577	-5.9086	7.9261e-10	9.4748e-09
ENSGALG00000034643	0.533863	42.3236	-6.3088	8.1035e-10	9.6774e-09
ENSGALG00000032717	0.588098	62.367	-6.7286	8.4634e-10	1.0097e-08
ENSGALG00000008905	15.227	118.338	-2.9582	8.7766e-10	1.044e-08
ENSGALG00000041106	108.757	0.820262	7.0508	8.7751e-10	1.044e-08
ENSGALG00000038579	4319.31	0	Inf	8.9251e-10	1.0612e-08
ENSGALG00000028612	5638.79	86760.3	-3.9436	9.0681e-10	1.0777e-08
ENSGALG00000037339	1116.19	247.883	2.1708	9.3272e-10	1.1068e-08
ENSGALG00000023936	349.48	26.5591	3.7179	9.6918e-10	1.1484e-08
ENSGALG00000041118	15.9781	119.475	-2.9025	1.0063e-09	1.1913e-08
ENSGALG00000007090	1127.76	4730.03	-2.0684	1.0266e-09	1.2142e-08
ENSGALG00000007546	2.02742	66.5714	-5.0372	1.0387e-09	1.2267e-08
ENSGALG00000013528	68.6107	3.49842	4.2937	1.0463e-09	1.2351e-08
ENSGALG00000002599	186.009	13.6576	3.7676	1.0591e-09	1.2489e-08
ENSGALG00000006379	476.63	0.707582	9.3958	1.0689e-09	1.2574e-08
ENSGALG00000010986	222.69	12.8937	4.1103	1.0865e-09	1.2775e-08
ENSGALG00000012987	210.5	40.2345	2.3873	1.1142e-09	1.3082e-08
ENSGALG00000007980	70.2343	4.21681	4.058	1.1298e-09	1.3253e-08
ENSGALG00000032680	17.9671	126.344	-2.8139	1.1408e-09	1.3369e-08
ENSGALG00000000284	121.415	767.992	-2.6611	1.1487e-09	1.3455e-08
ENSGALG00000032803	58.3804	264.026	-2.1771	1.1873e-09	1.3881e-08
ENSGALG00000040220	742.045	1.06137	9.4494	1.1962e-09	1.3978e-08
ENSGALG00000030097	1403.57	293.749	2.2564	1.198e-09	1.3992e-08
Novel01794	84.1407	396.99	-2.2382	1.2343e-09	1.441e-08
ENSGALG00000041202	516.323	10550.4	-4.3529	1.2414e-09	1.4485e-08
Novel00816	32.0108	376.456	-3.5558	1.2434e-09	1.4502e-08
ENSGALG00000016332	183.07	31.3107	2.5477	1.3216e-09	1.5399e-08
ENSGALG00000034776	143.389	21.3491	2.7477	1.3677e-09	1.592e-08
ENSGALG00000000619	293.159	33.2829	3.1388	1.3915e-09	1.6174e-08
ENSGALG00000003838	71.5098	4.31868	4.0495	1.4358e-09	1.6659e-08
ENSGALG00000040149	186.535	33.7762	2.4654	1.4443e-09	1.6749e-08
Novel01187	160.394	25.8633	2.6326	1.4493e-09	1.6798e-08
ENSGALG00000013100	157.217	2915.12	-4.2127	1.4788e-09	1.7116e-08
ENSGALG00000010224	45.7142	244.261	-2.4177	1.5746e-09	1.8182e-08
ENSGALG00000021884	131.887	17.5493	2.9098	1.5993e-09	1.845e-08
ENSGALG00000004334	156.995	1120.07	-2.8348	1.606e-09	1.8518e-08
ENSGALG00000035075	57.3692	1424.68	-4.6342	1.608e-09	1.8533e-08
ENSGALG00000005499	371.739	74.737	2.3144	1.6387e-09	1.8878e-08
Novel01761	6.46103	76.2915	-3.5617	1.6685e-09	1.9193e-08
ENSGALG00000014624	220.321	31.8789	2.7889	1.6729e-09	1.923e-08
ENSGALG00000004370	204.197	1167.87	-2.5159	1.7117e-09	1.9652e-08
ENSGALG00000032368	346.791	84.6977	2.0337	1.7132e-09	1.9652e-08
ENSGALG00000039096	350.329	83.3814	2.0709	1.7353e-09	1.9887e-08
ENSGALG00000043415	43.7945	0.410131	6.7385	1.7742e-09	2.0304e-08
ENSGALG00000002277	384.841	3429.96	-3.1559	1.7891e-09	2.0465e-08
ENSGALG00000042275	334.113	56.6778	2.5595	1.8206e-09	2.0816e-08
ENSGALG00000010554	51.4362	239.357	-2.2183	1.8911e-09	2.1612e-08
ENSGALG00000040650	89.2021	362.865	-2.0243	1.8979e-09	2.168e-08
ENSGALG00000030313	815.04	82.8931	3.2975	1.9319e-09	2.2047e-08
ENSGALG00000020415	267.211	57.9854	2.2042	1.9379e-09	2.2105e-08
ENSGALG00000042891	235.331	48.3273	2.2838	1.9404e-09	2.2124e-08
ENSGALG00000042471	3.40473	59.939	-4.1379	1.9454e-09	2.2159e-08
ENSGALG00000005638	128.124	541.126	-2.0784	1.9537e-09	2.2243e-08
ENSGALG00000002210	19021	4330.17	2.1351	1.9852e-09	2.2582e-08
ENSGALG00000033684	1303.03	300.375	2.117	2.0203e-09	2.2938e-08
Novel02937	43.5629	0.442728	6.6205	2.0496e-09	2.326e-08
ENSGALG00000026754	412.988	2.17909	7.5662	2.0723e-09	2.3506e-08
ENSGALG00000015375	12.9118	108.601	-3.0723	2.0888e-09	2.3683e-08
ENSGALG00000032640	480.136	1986.22	-2.0485	2.1375e-09	2.4212e-08
Novel02472	378.886	6.53921	5.8565	2.1451e-09	2.4287e-08
Novel01535	66.4835	0	Inf	2.222e-09	2.5135e-08
ENSGALG00000040907	4.81355	64.7541	-3.7498	2.255e-09	2.5484e-08
ENSGALG00000003841	279.134	23.9618	3.5421	2.2984e-09	2.5939e-08
Novel03081	25.4468	272.98	-3.4232	2.3136e-09	2.6098e-08
ENSGALG00000039322	2449.1	413.825	2.5652	2.3378e-09	2.636e-08
ENSGALG00000032260	7.06466	126.186	-4.1588	2.3426e-09	2.64e-08
ENSGALG00000043251	38.3075	0	Inf	2.3634e-09	2.6623e-08
ENSGALG00000029182	116547	6945.47	4.0687	2.3934e-09	2.6936e-08
ENSGALG00000031678	42.9669	222.269	-2.371	2.4079e-09	2.7087e-08
ENSGALG00000039200	1208.87	234.645	2.3651	2.4508e-09	2.7544e-08
ENSGALG00000016001	57.5331	381.304	-2.7285	2.4837e-09	2.7901e-08
ENSGALG00000036850	827.454	8248.5	-3.3174	2.5066e-09	2.8119e-08
ENSGALG00000032478	74.64	384.165	-2.3637	2.5082e-09	2.8125e-08
ENSGALG00000036945	41.5947	207.537	-2.3189	2.519e-09	2.8233e-08
Novel01050	40.9452	0	Inf	2.522e-09	2.8253e-08
Novel00192	268.615	24.122	3.4771	2.555e-09	2.861e-08
ENSGALG00000017715	605.446	7886.27	-3.7033	2.5879e-09	2.8965e-08
ENSGALG00000034476	452.933	78.6178	2.5264	2.5902e-09	2.8978e-08
ENSGALG00000034119	862.361	4725.26	-2.454	2.6015e-09	2.9078e-08
ENSGALG00000007536	264.279	59.2536	2.1571	2.6164e-09	2.923e-08
Novel00696	17.9512	120.512	-2.747	2.6563e-09	2.9649e-08
ENSGALG00000016563	322.991	75.8736	2.0898	2.7229e-09	3.0351e-08
ENSGALG00000041878	38.006	0	Inf	2.7222e-09	3.0351e-08
Novel02222	68.6966	4.26234	4.0105	2.7288e-09	3.0389e-08
Novel01142	61.1995	0	Inf	2.7688e-09	3.0806e-08
ENSGALG00000012522	25.1307	3383.43	-7.0729	2.7961e-09	3.1081e-08
ENSGALG00000042105	64.1036	406.592	-2.6651	2.8069e-09	3.1187e-08
ENSGALG00000027494	37.7964	0	Inf	2.9161e-09	3.2328e-08
ENSGALG00000012969	103.582	12.1554	3.0911	2.9208e-09	3.2364e-08
ENSGALG00000031605	145.392	4.85919	4.9031	2.9885e-09	3.3085e-08
ENSGALG00000014997	71.3836	300.519	-2.0738	3.1467e-09	3.4789e-08
ENSGALG00000000399	50.8357	355.337	-2.8053	3.1552e-09	3.4851e-08
ENSGALG00000030012	627.486	13.5162	5.5368	3.1765e-09	3.5071e-08
ENSGALG00000010163	342.522	18.1026	4.2419	3.1933e-09	3.524e-08
ENSGALG00000030929	42.4947	0.410131	6.6951	3.237e-09	3.5706e-08
ENSGALG00000015303	60.0879	261.246	-2.1203	3.2523e-09	3.5851e-08
Novel01652	37.5645	0	Inf	3.2836e-09	3.6172e-08
Novel02550	75.31	5.61426	3.7457	3.3017e-09	3.6354e-08
ENSGALG00000000839	1267.91	79.1171	4.0023	3.3249e-09	3.6545e-08
ENSGALG00000021230	284.441	35.5769	2.9991	3.3234e-09	3.6545e-08
ENSGALG00000033512	306.585	1606.86	-2.3899	3.3244e-09	3.6545e-08
ENSGALG00000002112	202.948	1037.95	-2.3546	3.4085e-09	3.7413e-08
ENSGALG00000011419	206.433	32.4844	2.6679	3.5454e-09	3.8863e-08
Novel01601	371.478	91.3622	2.0236	3.5589e-09	3.8976e-08
ENSGALG00000041801	40.3122	208.053	-2.3677	3.5666e-09	3.9042e-08
ENSGALG00000004833	6013.06	990.745	2.6015	3.5757e-09	3.9125e-08
ENSGALG00000032541	7.76756	83.2186	-3.4214	3.5816e-09	3.9171e-08
ENSGALG00000004550	291.784	1560	-2.4186	3.6016e-09	3.9355e-08
ENSGALG00000043764	42.4727	0.353791	6.9075	3.61e-09	3.9429e-08
ENSGALG00000035169	30.6313	168.776	-2.462	3.7539e-09	4.0927e-08
ENSGALG00000037748	469.479	65.1284	2.8497	3.7625e-09	4.0985e-08
ENSGALG00000015089	99.7506	5.82278	4.0985	3.82e-09	4.1577e-08
ENSGALG00000040927	131.898	903.729	-2.7765	3.8219e-09	4.1577e-08
Novel01324	195.025	37.6563	2.3727	3.9289e-09	4.2702e-08
ENSGALG00000032028	201.471	39.4103	2.3539	4.0317e-09	4.3702e-08
Novel00631	0.889916	40.7996	-5.5187	4.0953e-09	4.4353e-08
ENSGALG00000035925	415.057	0	Inf	4.1308e-09	4.4717e-08
ENSGALG00000037413	0	31.6181	#NAME?	4.2747e-09	4.6234e-08
ENSGALG00000028273	15837.9	98.3022	7.3319	4.2879e-09	4.6356e-08
ENSGALG00000025764	6842.19	671.317	3.3494	4.3161e-09	4.6599e-08
ENSGALG00000033303	103.778	486.95	-2.2303	4.3151e-09	4.6599e-08
ENSGALG00000032060	188.736	36.1649	2.3837	4.4246e-09	4.7665e-08
ENSGALG00000034392	45.3726	0.763922	5.8923	4.4431e-09	4.7823e-08
ENSGALG00000042419	57.0727	2.29177	4.6383	4.4793e-09	4.8191e-08
ENSGALG00000040184	242.672	53.646	2.1775	4.5016e-09	4.8409e-08
Novel01884	33.1864	169.38	-2.3516	4.5285e-09	4.8677e-08
ENSGALG00000033278	3.78351	154.83	-5.3548	4.563e-09	4.9005e-08
ENSGALG00000004044	592.337	4496.07	-2.9242	4.677e-09	5.0142e-08
ENSGALG00000033381	3781.75	0	Inf	4.8014e-09	5.143e-08
ENSGALG00000042657	45.5523	0.707582	6.0085	4.8641e-09	5.2079e-08
ENSGALG00000037335	163.723	29.5219	2.4714	4.9388e-09	5.2855e-08
ENSGALG00000041870	15.378	159.805	-3.3774	5.0394e-09	5.3885e-08
ENSGALG00000029799	477.83	0.353791	10.399	5.207e-09	5.5604e-08
ENSGALG00000002515	1771.94	352.261	2.3306	5.3076e-09	5.6653e-08
ENSGALG00000043632	162.9	29.7017	2.4554	5.3995e-09	5.7584e-08
Novel02483	87.958	1901.81	-4.4344	5.4436e-09	5.8029e-08
ENSGALG00000017347	253.024	1.73831	7.1854	5.5037e-09	5.8567e-08
ENSGALG00000021238	78.6894	7.06398	3.4776	5.5198e-09	5.8713e-08
ENSGALG00000030229	185.657	36.5729	2.3438	5.5471e-09	5.8977e-08
ENSGALG00000008914	236.516	21659	-6.5169	5.5524e-09	5.9008e-08
ENSGALG00000003857	3.79128	74.447	-4.2955	5.5633e-09	5.9099e-08
ENSGALG00000002786	24.5812	144.451	-2.555	5.6864e-09	6.0353e-08
Novel00109	0.526095	135.868	-8.0127	5.7705e-09	6.1193e-08
ENSGALG00000000003	127.09	18.2383	2.8008	5.7812e-09	6.1268e-08
ENSGALG00000040114	685.015	80.7707	3.0842	5.7826e-09	6.1268e-08
ENSGALG00000030210	116.688	16.4247	2.8287	5.9514e-09	6.3029e-08
ENSGALG00000025948	10.0187	90.7883	-3.1798	6.0436e-09	6.3922e-08
ENSGALG00000002125	796.106	3883.59	-2.2864	6.1155e-09	6.4655e-08
ENSGALG00000006886	46.393	211.107	-2.186	6.1567e-09	6.5006e-08
ENSGALG00000039156	10.3839	88.0016	-3.0832	6.1715e-09	6.5134e-08
Novel01716	85.9406	8.11454	3.4048	6.2019e-09	6.5426e-08
ENSGALG00000030275	51.9666	229.135	-2.1405	6.2307e-09	6.5702e-08
ENSGALG00000001491	294.429	70.9285	2.0535	6.2885e-09	6.6283e-08
ENSGALG00000016820	537.497	2268.06	-2.0771	6.3085e-09	6.6465e-08
ENSGALG00000005811	318.712	5.92252	5.7499	6.5585e-09	6.901e-08
ENSGALG00000005844	205.823	21.1563	3.2822	6.5704e-09	6.9105e-08
ENSGALG00000037951	67.6041	0.763922	6.4675	6.5746e-09	6.9119e-08
ENSGALG00000037387	152.677	25.1736	2.6005	6.7384e-09	7.0781e-08
Novel02775	1333.69	246.739	2.4344	6.7615e-09	7.0993e-08
Novel01389	94.5427	7.2142	3.7121	6.8023e-09	7.139e-08
ENSGALG00000021378	78.595	314.732	-2.0016	7.0194e-09	7.3637e-08
Novel03288	0	30.5902	#NAME?	7.1532e-09	7.4912e-08
ENSGALG00000034054	6525.41	2.94496	11.114	7.2895e-09	7.6307e-08
ENSGALG00000031597	35268.5	686.607	5.6828	7.5059e-09	7.8505e-08
Novel00938	44.0412	0.820262	5.7466	7.5336e-09	7.8761e-08
ENSGALG00000043016	3.42746	57.3322	-4.0641	7.5419e-09	7.8814e-08
ENSGALG00000038584	40.3106	0.353791	6.8321	7.5612e-09	7.8982e-08
ENSGALG00000015599	303.212	3.86106	6.2952	7.824e-09	8.1657e-08
ENSGALG00000032944	31.0127	158.204	-2.3509	8.0143e-09	8.35e-08
ENSGALG00000000544	17.7034	115.533	-2.7062	8.288e-09	8.6242e-08
ENSGALG00000041097	18.3927	117.373	-2.6739	8.3076e-09	8.6409e-08
ENSGALG00000000775	590.447	3349.41	-2.504	8.3567e-09	8.6845e-08
ENSGALG00000013468	7.04093	177.758	-4.658	8.4817e-09	8.807e-08
ENSGALG00000035544	24.4307	145.61	-2.5753	8.5027e-09	8.825e-08
ENSGALG00000039334	50.5858	229.158	-2.1795	8.8268e-09	9.1459e-08
ENSGALG00000017148	90.728	9.6275	3.2363	8.9242e-09	9.2429e-08
Novel00504	7.55047	80.4796	-3.414	9.0892e-09	9.3988e-08
ENSGALG00000008950	153.605	782.2	-2.3483	9.1563e-09	9.4632e-08
Novel02351	91.2797	7.50475	3.6044	9.1919e-09	9.4919e-08
ENSGALG00000033486	61.6424	253.472	-2.0398	9.3721e-09	9.6658e-08
ENSGALG00000040445	119.326	1.59304	6.227	9.4489e-09	9.7409e-08
ENSGALG00000041456	14.3064	103.877	-2.8601	9.6058e-09	9.8948e-08
ENSGALG00000007324	556.479	132.513	2.0702	9.6131e-09	9.8976e-08
ENSGALG00000007525	88.6839	678.496	-2.9356	9.6352e-09	9.912e-08
ENSGALG00000035583	132.029	15.144	3.124	9.7907e-09	1.0068e-07
ENSGALG00000008716	730.194	86.6121	3.0756	1.0064e-08	1.0336e-07
ENSGALG00000012228	121.09	19.2037	2.6566	1.0245e-08	1.0508e-07
ENSGALG00000003660	267.054	18.6443	3.8403	1.0398e-08	1.0647e-07
ENSGALG00000034438	213.295	27.1038	2.9763	1.0522e-08	1.0765e-07
ENSGALG00000035131	37.5105	0	Inf	1.0743e-08	1.0978e-07
ENSGALG00000013604	259.509	25.217	3.3633	1.0777e-08	1.1008e-07
ENSGALG00000034970	276.347	3900.6	-3.8191	1.0803e-08	1.1025e-07
ENSGALG00000043209	189.085	20.7908	3.185	1.0802e-08	1.1025e-07
ENSGALG00000010290	311.089	2041.7	-2.7144	1.083e-08	1.1034e-07
ENSGALG00000006891	746.41	3066.08	-2.0384	1.0919e-08	1.112e-07
ENSGALG00000023526	0.990186	41.6922	-5.3959	1.0976e-08	1.1174e-07
Novel01076	2.11215	56.6253	-4.7447	1.1217e-08	1.1409e-07
[truncated: 2,084 more rows]

## Sheet: E16 vs 1d
	readcount_H_E16_F	readcount_H_1d_F	log2FoldChange	pval	padj
ENSGALG00000017316	33.3518	3435.37	-6.6866	7.3995e-65	1.7542e-60
ENSGALG00000016620	1549.26	3.61258	8.7443	1.6801e-45	1.6075e-41
Novel03041	2326.57	68.2371	5.0915	2.0342e-45	1.6075e-41
ENSGALG00000002479	9001.94	362.611	4.6337	3.2881e-41	1.9488e-37
ENSGALG00000010614	12212.9	275990	-4.4981	1.2075e-40	5.7251e-37
Novel00168	2381.83	44.7065	5.7354	1.7134e-40	6.7698e-37
ENSGALG00000039681	3732.1	82.5499	5.4986	3.7579e-38	1.2727e-34
ENSGALG00000014569	291.719	5573.53	-4.2559	4.0754e-37	1.2077e-33
ENSGALG00000015779	325.913	6428.39	-4.3019	1.1791e-36	3.106e-33
ENSGALG00000006346	4369.64	242.814	4.1696	1.4926e-35	3.5384e-32
ENSGALG00000037675	13986.6	322.489	5.4386	3.1341e-33	6.7545e-30
ENSGALG00000014804	2477.08	161.305	3.9408	3.7522e-31	7.4127e-28
ENSGALG00000042652	39.4556	994.122	-4.6551	5.5235e-30	1.0073e-26
ENSGALG00000007993	538.1	25.5469	4.3967	5.5766e-29	9.4431e-26
ENSGALG00000011270	613.41	32.304	4.2471	9.5709e-29	1.5126e-25
ENSGALG00000015055	1497.08	106.087	3.8188	1.3651e-28	2.0227e-25
ENSGALG00000031593	9460.85	784.309	3.5925	1.6642e-28	2.3207e-25
ENSGALG00000006670	95.4319	3243.9	-5.0871	3.771e-28	4.9666e-25
ENSGALG00000005797	6081.23	592.751	3.3589	1.8656e-25	2.3277e-22
ENSGALG00000040035	61.3181	797.61	-3.7013	4.8553e-25	5.7553e-22
ENSGALG00000009545	2004.15	19305	-3.2679	1.2873e-24	1.4533e-21
ENSGALG00000009870	141.14	1475.64	-3.3861	1.51e-24	1.5564e-21
ENSGALG00000042581	671.641	6871.44	-3.3549	1.4693e-24	1.5564e-21
ENSGALG00000042134	848.575	70.6465	3.5864	3.9976e-24	3.9488e-21
ENSGALG00000036853	556.131	5443.7	-3.2911	6.6558e-24	6.3116e-21
ENSGALG00000042020	1603.05	166.583	3.2665	6.607e-23	6.0243e-20
ENSGALG00000038330	520.002	5044.01	-3.278	1.2809e-22	1.1247e-19
ENSGALG00000027703	815.627	75.327	3.4367	1.5666e-22	1.3264e-19
ENSGALG00000013703	679.617	62.4285	3.4444	5.9385e-22	4.8546e-19
ENSGALG00000012552	602.477	5307.76	-3.1391	6.8334e-22	5.2258e-19
ENSGALG00000015419	3009.32	355.079	3.0832	6.8036e-22	5.2258e-19
ENSGALG00000037625	1988.24	244.196	3.0254	8.8821e-21	6.5803e-18
ENSGALG00000008439	2257.05	16455.3	-2.866	1.5258e-20	1.0961e-17
ENSGALG00000036637	375.093	3031.66	-3.0148	2.0137e-20	1.4041e-17
ENSGALG00000016635	7252.15	989.767	2.8732	3.6235e-20	2.4544e-17
ENSGALG00000008298	1551.84	193.593	3.0029	3.7319e-20	2.4575e-17
ENSGALG00000034427	642.264	6994.33	-3.4449	3.9961e-20	2.5604e-17
ENSGALG00000016430	2230.33	16223.3	-2.8627	5.108e-20	3.1801e-17
ENSGALG00000038946	15.3581	1049	-6.0939	5.2315e-20	3.1801e-17
ENSGALG00000006110	902.027	106.108	3.0876	8.1699e-20	4.8421e-17
ENSGALG00000006964	262.931	18.0745	3.8627	8.4024e-20	4.8585e-17
ENSGALG00000034895	105.171	896.526	-3.0916	9.9075e-20	5.5923e-17
ENSGALG00000007837	1210.35	153.101	2.9829	1.111e-19	6.1253e-17
ENSGALG00000042317	110.711	946.973	-3.0965	1.2601e-19	6.7894e-17
Novel00466	226.508	13.6448	4.0531	1.4616e-19	7.7e-17
ENSGALG00000000557	595.839	63.443	3.2314	1.879e-19	9.5063e-17
ENSGALG00000041548	1595.86	206.723	2.9486	1.8847e-19	9.5063e-17
ENSGALG00000036838	979.488	119.077	3.0401	2.3451e-19	1.1583e-16
ENSGALG00000035804	676.883	4867.28	-2.8461	3.2024e-19	1.5494e-16
ENSGALG00000016584	2142.47	287.158	2.8994	3.9018e-19	1.85e-16
ENSGALG00000003085	1265.4	162.373	2.9622	4.1103e-19	1.9107e-16
ENSGALG00000005806	319.848	27.6028	3.5345	4.4603e-19	2.0335e-16
ENSGALG00000011020	6237.97	42183.3	-2.7575	6.1313e-19	2.7425e-16
ENSGALG00000002781	617.517	69.8466	3.1442	7.6748e-19	3.3694e-16
ENSGALG00000011248	665.939	4665.24	-2.8085	9.0574e-19	3.9041e-16
ENSGALG00000008367	951.89	74.623	3.6731	1.0411e-18	4.4075e-16
ENSGALG00000004195	1033.08	134.722	2.9389	1.1048e-18	4.5951e-16
ENSGALG00000003923	36341.5	5554.9	2.7098	1.2109e-18	4.8655e-16
ENSGALG00000035673	212.301	13.0762	4.0211	1.2099e-18	4.8655e-16
ENSGALG00000004103	121.057	3.09023	5.2918	1.4893e-18	5.8845e-16
ENSGALG00000030012	236.161	17.0587	3.7912	1.5285e-18	5.9403e-16
ENSGALG00000003584	1522.26	210.222	2.8562	1.7565e-18	6.7163e-16
ENSGALG00000021128	1722.37	239.812	2.8444	2.868e-18	1.0792e-15
ENSGALG00000033405	1297.47	177.243	2.8719	3.0642e-18	1.1351e-15
ENSGALG00000029140	323.414	30.3927	3.4116	3.8208e-18	1.3795e-15
Novel00537	139.268	5.4073	4.6868	3.8406e-18	1.3795e-15
ENSGALG00000027874	93.1428	811.426	-3.1229	6.4701e-18	2.2894e-15
ENSGALG00000003922	2334.67	349.638	2.7393	8.4315e-18	2.9395e-15
ENSGALG00000002855	1423.25	203.81	2.8039	9.2197e-18	3.1526e-15
Novel00662	141.056	5.72974	4.6217	9.3087e-18	3.1526e-15
ENSGALG00000006431	450.66	2988.18	-2.7292	9.6272e-18	3.2145e-15
ENSGALG00000030377	602.396	56.373	3.4176	1.6242e-17	5.348e-15
ENSGALG00000016993	2194.98	13839.3	-2.6565	1.7555e-17	5.7012e-15
Novel00726	847.051	117.074	2.855	2.0409e-17	6.5382e-15
ENSGALG00000013239	13473.8	302.446	5.4773	2.1287e-17	6.7286e-15
ENSGALG00000000172	1081.74	155.097	2.8021	2.4054e-17	7.5033e-15
ENSGALG00000008444	1990.65	302.507	2.7182	3.2329e-17	9.838e-15
ENSGALG00000037401	3609.22	22068.5	-2.6122	3.2369e-17	9.838e-15
ENSGALG00000023444	72.0059	0	Inf	3.4795e-17	1.0311e-14
Novel02520	2077.77	13280	-2.6762	3.4451e-17	1.0311e-14
ENSGALG00000039522	57.981	471.495	-3.0236	4.1399e-17	1.2116e-14
ENSGALG00000017085	422.7	47.0293	3.168	4.8883e-17	1.4133e-14
ENSGALG00000030212	345.657	2244.76	-2.6991	5.1612e-17	1.4742e-14
ENSGALG00000016442	833.289	118.728	2.8112	8.5195e-17	2.4044e-14
ENSGALG00000034384	131.855	4.93119	4.7409	9.2669e-17	2.5545e-14
ENSGALG00000043290	2107.24	324.542	2.6989	9.2151e-17	2.5545e-14
ENSGALG00000012821	3285.46	539.479	2.6065	9.4089e-17	2.5639e-14
ENSGALG00000004491	1524.93	237.893	2.6804	1.1982e-16	3.2278e-14
ENSGALG00000016555	5094.21	30279.3	-2.5714	1.4836e-16	3.8791e-14
ENSGALG00000025764	2763.43	252.652	3.4512	1.4832e-16	3.8791e-14
Novel01712	2061.23	12286.6	-2.5755	1.489e-16	3.8791e-14
ENSGALG00000030466	5640.26	33759.9	-2.5815	1.6881e-16	4.35e-14
ENSGALG00000030603	445.125	56.0241	2.9901	1.9338e-16	4.8772e-14
Novel01249	249.501	2016.8	-3.015	1.9314e-16	4.8772e-14
ENSGALG00000006174	754.123	107.858	2.8057	2.1332e-16	5.2135e-14
ENSGALG00000017046	7796.12	1379.27	2.4988	2.1004e-16	5.2135e-14
Novel01928	126.427	865.597	-2.7754	2.131e-16	5.2135e-14
ENSGALG00000035938	2.69023	209.428	-6.2826	2.2564e-16	5.4585e-14
ENSGALG00000035065	359.734	42.2174	3.091	3.0348e-16	7.2674e-14
ENSGALG00000038440	331.778	2966.79	-3.1606	3.1434e-16	7.4521e-14
ENSGALG00000014695	86.9258	2880.76	-5.0505	3.9064e-16	9.1692e-14
ENSGALG00000010785	261.904	1860.92	-2.8289	4.3738e-16	1.0166e-13
ENSGALG00000025996	869.846	132.018	2.72	4.7565e-16	1.0948e-13
ENSGALG00000003438	578.956	81.1731	2.8344	5.1987e-16	1.1782e-13
ENSGALG00000016524	1098.5	176.654	2.6365	5.2183e-16	1.1782e-13
ENSGALG00000034271	957.585	150.08	2.6737	7.2612e-16	1.624e-13
Novel01736	352.192	21.6212	4.0258	7.9563e-16	1.7628e-13
Novel01049	199.396	16.8899	3.5614	8.3929e-16	1.8423e-13
ENSGALG00000037744	4248.2	24038.9	-2.5004	8.4845e-16	1.8453e-13
ENSGALG00000006755	1731	9895.38	-2.5152	9.4484e-16	2.0363e-13
ENSGALG00000026380	825.297	127.894	2.69	1.0704e-15	2.2773e-13
ENSGALG00000026817	189.918	16.059	3.5639	1.0759e-15	2.2773e-13
ENSGALG00000001975	411.202	2385.82	-2.5366	1.248e-15	2.6182e-13
ENSGALG00000005363	442.071	57.2719	2.9484	1.2606e-15	2.6215e-13
ENSGALG00000001096	4514.81	24817.6	-2.4586	1.2934e-15	2.6664e-13
ENSGALG00000015464	708.912	109.985	2.6883	1.7148e-15	3.5045e-13
ENSGALG00000011998	1356.31	228.474	2.5696	1.8393e-15	3.7269e-13
ENSGALG00000017025	1196.77	198.588	2.5913	1.9011e-15	3.8195e-13
ENSGALG00000009700	3264.53	53789.7	-4.0424	2.0868e-15	4.1573e-13
ENSGALG00000011950	9907.46	53714.8	-2.4387	2.5966e-15	5.1298e-13
ENSGALG00000000470	2423.44	430.068	2.4944	3.3143e-15	6.4936e-13
ENSGALG00000036221	54.8005	816.984	-3.898	4.0245e-15	7.8204e-13
ENSGALG00000036645	482.05	68.3442	2.8183	4.4594e-15	8.595e-13
Novel03034	400.875	55.6553	2.8486	4.9447e-15	9.4535e-13
ENSGALG00000035030	1028.36	172.692	2.5741	5.2003e-15	9.8626e-13
ENSGALG00000033829	104.868	685.94	-2.7095	5.3116e-15	9.9151e-13
Novel01226	529.804	76.8695	2.785	5.282e-15	9.9151e-13
ENSGALG00000003074	1611.41	284.695	2.5008	5.4327e-15	1.0062e-12
ENSGALG00000007609	724.049	113.872	2.6687	5.5405e-15	1.0182e-12
ENSGALG00000001475	10430.4	1916.88	2.444	6.0945e-15	1.1114e-12
ENSGALG00000023435	41643.6	4365.79	3.2538	6.186e-15	1.1195e-12
ENSGALG00000003590	539.621	82.5592	2.7084	6.2884e-15	1.1294e-12
ENSGALG00000043583	217.705	22.3666	3.283	6.7209e-15	1.198e-12
ENSGALG00000028273	5107.4	308.735	4.0481	7.3578e-15	1.3017e-12
ENSGALG00000032456	71830.8	378756	-2.3986	8.2307e-15	1.4347e-12
Novel00949	760.506	4200.38	-2.4655	8.2132e-15	1.4347e-12
Novel02711	47.0117	366.753	-2.9637	8.5485e-15	1.4793e-12
ENSGALG00000010633	797.536	130.189	2.6149	9.1614e-15	1.5738e-12
ENSGALG00000031129	1504.03	263.984	2.5103	1.0289e-14	1.7548e-12
ENSGALG00000016834	414.977	2200.44	-2.4067	1.0935e-14	1.8517e-12
ENSGALG00000001640	1140.45	199.782	2.5131	1.2083e-14	2.0317e-12
ENSGALG00000034493	166.271	14.6434	3.5052	1.3313e-14	2.2227e-12
ENSGALG00000001392	302.58	37.7586	3.0024	1.3699e-14	2.2553e-12
Novel02968	67.3617	459.559	-2.7702	1.3611e-14	2.2553e-12
ENSGALG00000005043	605.295	6980.47	-3.5276	1.3948e-14	2.2667e-12
ENSGALG00000025810	780.422	132.411	2.5592	1.396e-14	2.2667e-12
ENSGALG00000010645	450.849	40.3394	3.4824	1.4381e-14	2.3193e-12
ENSGALG00000015691	1369.58	247.056	2.4708	1.4582e-14	2.3357e-12
ENSGALG00000008233	548.017	86.2837	2.6671	1.6568e-14	2.6361e-12
ENSGALG00000038688	236.705	27.1742	3.1228	1.6703e-14	2.6398e-12
ENSGALG00000009680	59.863	400.46	-2.7419	1.92e-14	3.0145e-12
ENSGALG00000008814	246.853	1359.57	-2.4614	1.9843e-14	3.0948e-12
ENSGALG00000041091	56738.5	291045	-2.3588	2.0972e-14	3.2496e-12
Novel02483	151.67	1600.36	-3.3994	2.3094e-14	3.5551e-12
ENSGALG00000036229	33227.6	170523	-2.3595	2.5369e-14	3.8801e-12
ENSGALG00000002891	8304.69	42014.6	-2.3389	2.5749e-14	3.9131e-12
ENSGALG00000014999	347.929	48.2327	2.8507	2.602e-14	3.929e-12
Novel03087	1437.14	7432.8	-2.3707	3.0547e-14	4.5833e-12
ENSGALG00000026091	105.424	5.3183	4.3091	3.7635e-14	5.6115e-12
Novel01646	975.331	12702.8	-3.7031	3.8975e-14	5.7749e-12
ENSGALG00000014869	3703.67	18519.1	-2.322	4.3788e-14	6.4477e-12
ENSGALG00000009654	1408.76	21572.7	-3.9367	4.7909e-14	7.0109e-12
Novel02112	1864.44	10946.9	-2.5537	4.9746e-14	7.2352e-12
ENSGALG00000010748	180.627	17.7509	3.3471	5.0395e-14	7.2451e-12
ENSGALG00000029719	25.9157	226.49	-3.1276	5.0426e-14	7.2451e-12
ENSGALG00000000720	105.835	624.17	-2.5601	5.1648e-14	7.3499e-12
ENSGALG00000011099	994.888	131.773	2.9165	5.1775e-14	7.3499e-12
ENSGALG00000016292	327.249	47.4458	2.786	5.3674e-14	7.4849e-12
ENSGALG00000027330	410.034	2161.74	-2.3984	5.4305e-14	7.4849e-12
ENSGALG00000032079	62279.2	312021	-2.3248	5.4109e-14	7.4849e-12
ENSGALG00000042809	5976.8	29726.9	-2.3143	5.3061e-14	7.4849e-12
Novel02767	589.932	3047.46	-2.369	5.3908e-14	7.4849e-12
ENSGALG00000034456	2748.72	543.538	2.3383	5.6859e-14	7.7916e-12
ENSGALG00000014897	378.367	55.4438	2.7707	6.3894e-14	8.7054e-12
ENSGALG00000039216	30878.6	6366.31	2.2781	7.2026e-14	9.7573e-12
ENSGALG00000011271	10183.1	1781.42	2.5151	7.7105e-14	1.0386e-11
ENSGALG00000026572	685.468	3501.31	-2.3527	7.8524e-14	1.0517e-11
ENSGALG00000029500	38156.3	188237	-2.3026	8.4866e-14	1.1303e-11
ENSGALG00000041461	117.387	7.78451	3.9145	8.5482e-14	1.1321e-11
ENSGALG00000005017	136.161	746.325	-2.4545	8.8812e-14	1.1697e-11
ENSGALG00000015437	1470.44	7273.74	-2.3064	9.088e-14	1.1903e-11
ENSGALG00000007484	3458.41	16793	-2.2797	1.0421e-13	1.3574e-11
ENSGALG00000009241	1336.11	160.959	3.0533	1.0582e-13	1.3708e-11
ENSGALG00000009690	649.397	112.776	2.5256	1.3573e-13	1.7488e-11
Novel00799	109.015	3.13647	5.1192	1.4794e-13	1.8958e-11
ENSGALG00000009971	641.181	114.409	2.4865	1.5509e-13	1.9557e-11
ENSGALG00000037211	34.2664	260.632	-2.9271	1.5493e-13	1.9557e-11
ENSGALG00000037593	599.215	2948.07	-2.2986	1.5458e-13	1.9557e-11
ENSGALG00000008095	735.04	132.535	2.4714	1.6099e-13	2.0087e-11
ENSGALG00000042009	295.625	40.3277	2.8739	1.6039e-13	2.0087e-11
ENSGALG00000036713	2143.35	10585.1	-2.3041	1.854e-13	2.3012e-11
ENSGALG00000008858	6559.37	30844.6	-2.2334	2.15e-13	2.6547e-11
Novel01599	223.992	28.0118	2.9993	2.5394e-13	3.1192e-11
ENSGALG00000004794	600.275	107.316	2.4838	2.6418e-13	3.2284e-11
ENSGALG00000010120	334.471	50.2398	2.735	2.6742e-13	3.2511e-11
ENSGALG00000005809	472.05	78.8157	2.5824	2.7335e-13	3.3063e-11
ENSGALG00000001949	6774.71	31883.6	-2.2346	2.7754e-13	3.3399e-11
ENSGALG00000005845	496.601	84.6205	2.553	2.8714e-13	3.4379e-11
ENSGALG00000041255	822.329	152.239	2.4334	3.0628e-13	3.6488e-11
ENSGALG00000032404	32413.8	2614.64	3.6319	3.4583e-13	4.0993e-11
Novel00794	201.106	24.24	3.0525	3.6958e-13	4.3591e-11
ENSGALG00000042750	40912	191672	-2.228	3.7329e-13	4.381e-11
ENSGALG00000004161	900.358	173.945	2.3719	3.8538e-13	4.4785e-11
Novel03270	0.524286	90.2785	-7.4279	3.8527e-13	4.4785e-11
ENSGALG00000036766	263.089	36.8598	2.8354	4.3566e-13	5.0382e-11
ENSGALG00000041118	41.8612	281.351	-2.7487	4.5121e-13	5.1926e-11
ENSGALG00000000585	251.641	34.3149	2.8745	4.554e-13	5.2155e-11
ENSGALG00000036513	433.347	2725.72	-2.653	4.6619e-13	5.3135e-11
ENSGALG00000008066	2119.82	9818.9	-2.2116	5.0494e-13	5.7275e-11
ENSGALG00000008584	696.719	129.067	2.4325	5.1392e-13	5.8016e-11
ENSGALG00000011498	433.243	2111.44	-2.285	5.202e-13	5.8448e-11
ENSGALG00000014513	319.493	49.0575	2.7032	5.2988e-13	5.9254e-11
ENSGALG00000020488	837.72	157.784	2.4085	5.6283e-13	6.2643e-11
ENSGALG00000033888	4491.13	20592.4	-2.197	5.7244e-13	6.3416e-11
ENSGALG00000015961	3936.39	18126.9	-2.2032	5.8394e-13	6.4388e-11
ENSGALG00000005961	617.917	112.829	2.4533	5.9897e-13	6.574e-11
ENSGALG00000015624	1840.8	391.468	2.2334	6.4446e-13	7.0406e-11
ENSGALG00000003550	758.491	145.77	2.3794	7.9169e-13	8.5701e-11
Novel01711	496.394	88.0275	2.4955	7.8953e-13	8.5701e-11
ENSGALG00000009452	548.923	99.6038	2.4623	9.4962e-13	1.0208e-10
ENSGALG00000014692	619.718	114.744	2.4332	9.5164e-13	1.0208e-10
ENSGALG00000006525	209.177	27.1429	2.9461	1.0225e-12	1.0919e-10
ENSGALG00000005215	414.934	70.5111	2.557	1.0595e-12	1.1263e-10
ENSGALG00000007191	915.474	181.48	2.3347	1.0846e-12	1.1479e-10
ENSGALG00000002860	1.55989	59.9487	-5.2642	1.1107e-12	1.1703e-10
ENSGALG00000023193	149.723	15.4442	3.2772	1.1292e-12	1.1845e-10
ENSGALG00000005843	29875.8	134622	-2.1719	1.2822e-12	1.3391e-10
ENSGALG00000005789	7416.81	33458.5	-2.1735	1.315e-12	1.3614e-10
ENSGALG00000030597	894.216	178.037	2.3284	1.3122e-12	1.3614e-10
ENSGALG00000035950	235.699	33.239	2.826	1.3796e-12	1.422e-10
ENSGALG00000004037	252.634	36.7972	2.7794	1.411e-12	1.448e-10
ENSGALG00000037889	994.183	113.809	3.1269	1.4792e-12	1.5115e-10
ENSGALG00000008301	70.6222	408.568	-2.5324	1.4992e-12	1.5253e-10
ENSGALG00000015874	387.574	66.9646	2.533	1.7574e-12	1.7804e-10
ENSGALG00000039080	611.24	119.604	2.3535	1.9958e-12	2.0134e-10
ENSGALG00000014801	502.486	91.1846	2.4622	2.0204e-12	2.0296e-10
ENSGALG00000016955	643.579	2928.94	-2.1862	2.3241e-12	2.3228e-10
ENSGALG00000032398	2117.45	463.161	2.1927	2.3319e-12	2.3228e-10
ENSGALG00000038375	556.621	2528.8	-2.1837	2.4444e-12	2.4247e-10
ENSGALG00000041418	3735.9	16675.5	-2.1582	2.5306e-12	2.4997e-10
ENSGALG00000041299	356.087	59.7565	2.5751	2.5415e-12	2.5001e-10
ENSGALG00000016456	91.2456	1076.75	-3.5608	2.7025e-12	2.6474e-10
ENSGALG00000010674	464.02	85.4676	2.4407	3.1352e-12	3.0587e-10
ENSGALG00000043642	330.299	55.1203	2.5831	3.3145e-12	3.2204e-10
ENSGALG00000009207	175.703	866.68	-2.3024	3.4981e-12	3.3849e-10
ENSGALG00000035334	148328	637509	-2.1037	3.6109e-12	3.4798e-10
ENSGALG00000040173	1446.24	6358.15	-2.1363	3.6572e-12	3.5101e-10
ENSGALG00000002925	7674.99	33518.3	-2.1267	3.6936e-12	3.5308e-10
ENSGALG00000003911	611.006	31.473	4.279	4.1265e-12	3.9288e-10
ENSGALG00000013208	572.082	111.627	2.3575	4.2659e-12	4.0322e-10
ENSGALG00000036892	649.598	128.672	2.3358	4.2691e-12	4.0322e-10
ENSGALG00000015847	1227.91	257.505	2.2535	4.3172e-12	4.0614e-10
ENSGALG00000029264	179.741	23.1422	2.9573	4.473e-12	4.1914e-10
ENSGALG00000036458	147.069	730.549	-2.3125	4.8636e-12	4.5394e-10
ENSGALG00000014155	4962	21830.2	-2.1373	5.4026e-12	5.0227e-10
Novel01146	366.362	1652.65	-2.1734	5.609e-12	5.1942e-10
Novel00923	218.157	2871.63	-3.7184	5.98e-12	5.5162e-10
ENSGALG00000001330	12008.4	51320.7	-2.0955	6.3284e-12	5.815e-10
ENSGALG00000013167	5174.34	22004.9	-2.0884	6.4051e-12	5.8628e-10
ENSGALG00000030728	82.1244	4.64804	4.1431	6.8291e-12	6.2268e-10
ENSGALG00000039212	2949.55	12430.1	-2.0753	6.999e-12	6.3572e-10
ENSGALG00000016582	395.03	71.4286	2.4674	7.4162e-12	6.7105e-10
ENSGALG00000002908	202.301	28.7435	2.8152	7.5275e-12	6.7854e-10
ENSGALG00000006037	1318.3	290.234	2.1834	7.7127e-12	6.926e-10
ENSGALG00000032142	221717	948618	-2.0971	7.8133e-12	6.9898e-10
ENSGALG00000011661	2622.5	11107.5	-2.0825	7.9158e-12	7.0549e-10
ENSGALG00000043234	28599.1	3818.46	2.9049	8.2798e-12	7.3517e-10
ENSGALG00000017036	1451.11	328.039	2.1452	8.414e-12	7.443e-10
ENSGALG00000007744	311.064	39.7409	2.9685	8.6252e-12	7.5732e-10
ENSGALG00000016937	129.01	13.2415	3.2843	8.6225e-12	7.5732e-10
ENSGALG00000008393	702.69	51.2282	3.7779	8.7705e-12	7.6724e-10
Novel00441	106.61	8.80955	3.5971	8.9691e-12	7.8173e-10
ENSGALG00000003744	714.267	148.005	2.2708	9.1411e-12	7.938e-10
ENSGALG00000028537	4836.77	20224.6	-2.064	9.954e-12	8.6124e-10
ENSGALG00000028302	5130.02	21578.1	-2.0725	1.0246e-11	8.8326e-10
ENSGALG00000012809	641.047	4476.38	-2.8038	1.1088e-11	9.524e-10
ENSGALG00000011635	111.257	9.84153	3.4989	1.1481e-11	9.8257e-10
ENSGALG00000016562	35.5064	813.363	-4.5177	1.1836e-11	1.0093e-09
ENSGALG00000042249	8.18378	98.0759	-3.5831	1.2416e-11	1.055e-09
ENSGALG00000043223	225.509	32.446	2.7971	1.2508e-11	1.059e-09
Novel02305	268.917	42.4759	2.6624	1.3204e-11	1.114e-09
ENSGALG00000033428	725.252	154.579	2.2301	1.4578e-11	1.2255e-09
ENSGALG00000011963	111.212	10.1224	3.4577	1.4764e-11	1.2324e-09
ENSGALG00000013420	383.969	72.3095	2.4087	1.4736e-11	1.2324e-09
ENSGALG00000013001	125.615	13.0046	3.2719	1.6756e-11	1.3938e-09
ENSGALG00000043174	93.8348	7.02525	3.7395	1.8491e-11	1.5328e-09
ENSGALG00000033880	628.743	130.104	2.2728	2.067e-11	1.7074e-09
ENSGALG00000006503	2832.36	11551.9	-2.0281	2.0778e-11	1.7103e-09
ENSGALG00000015203	64.87	2.32055	4.805	2.1652e-11	1.7761e-09
ENSGALG00000010258	7088.24	1709.73	2.0517	2.1891e-11	1.7895e-09
Novel01416	187.544	2.00853	6.5449	2.305e-11	1.8778e-09
ENSGALG00000001184	1573.38	6580.99	-2.0644	2.3923e-11	1.9422e-09
ENSGALG00000001130	832.363	185.831	2.1632	2.4391e-11	1.9735e-09
ENSGALG00000033231	424.885	83.3748	2.3494	2.558e-11	2.0627e-09
ENSGALG00000027374	52.2967	810.686	-3.9544	2.6282e-11	2.1121e-09
ENSGALG00000016739	4297.43	17354.2	-2.0137	2.8427e-11	2.2768e-09
ENSGALG00000010476	1300.21	5295.52	-2.026	2.9409e-11	2.3475e-09
ENSGALG00000001452	6748.62	27210.3	-2.0115	2.9943e-11	2.3821e-09
ENSGALG00000009703	2900.08	11719.2	-2.0147	3.0204e-11	2.3887e-09
ENSGALG00000012199	245.41	40.3936	2.603	3.0228e-11	2.3887e-09
ENSGALG00000013191	1212.44	4978.61	-2.0378	3.0495e-11	2.4018e-09
ENSGALG00000005034	8389.51	33698.5	-2.006	3.1874e-11	2.5021e-09
ENSGALG00000004250	488.961	85.5287	2.5152	3.2668e-11	2.556e-09
ENSGALG00000009172	49.7525	301.181	-2.5978	3.4381e-11	2.6723e-09
ENSGALG00000011734	270.052	47.1404	2.5182	3.5521e-11	2.7519e-09
ENSGALG00000033063	204.482	31.2315	2.7109	3.759e-11	2.9028e-09
Novel02797	1469.72	7276.43	-2.3077	4.1829e-11	3.2196e-09
Novel02820	841.725	135.27	2.6375	4.236e-11	3.25e-09
ENSGALG00000004801	1202.08	6166.81	-2.359	4.422e-11	3.3817e-09
ENSGALG00000005038	279.443	49.6123	2.4938	4.8068e-11	3.6564e-09
ENSGALG00000031152	262.307	45.5929	2.5244	4.8121e-11	3.6564e-09
ENSGALG00000030436	13575.1	54923	-2.0164	4.8767e-11	3.6937e-09
ENSGALG00000042554	252.386	1093.27	-2.1149	5.0369e-11	3.8028e-09
ENSGALG00000042784	373.126	1545.63	-2.0505	5.1386e-11	3.8551e-09
ENSGALG00000010900	407.09	81.1524	2.3266	5.695e-11	4.249e-09
ENSGALG00000015602	2014.88	50759	-4.6549	5.6995e-11	4.249e-09
ENSGALG00000031553	278.529	51.1458	2.4451	6.7666e-11	5.013e-09
ENSGALG00000011176	287.306	51.5467	2.4786	7.8476e-11	5.7778e-09
ENSGALG00000002993	120.925	13.7559	3.136	7.8781e-11	5.7822e-09
ENSGALG00000005030	1312.81	310.063	2.082	8.0557e-11	5.8944e-09
ENSGALG00000020067	1348.42	133.449	3.3369	8.5666e-11	6.2489e-09
ENSGALG00000024047	360.458	72.0298	2.3232	8.8152e-11	6.4105e-09
ENSGALG00000002744	145.89	9.98024	3.8697	9.0062e-11	6.5294e-09
Novel02015	225.039	19.8044	3.5063	9.1605e-11	6.6209e-09
ENSGALG00000012121	2706.64	670.471	2.0133	9.4183e-11	6.7866e-09
ENSGALG00000033902	38.5695	992.992	-4.6863	9.7279e-11	6.9838e-09
ENSGALG00000043800	5.52022	171.959	-4.9612	9.7509e-11	6.9838e-09
ENSGALG00000004960	10537.1	2539.86	2.0527	1.0228e-10	7.2595e-09
ENSGALG00000014425	339.944	67.6672	2.3288	1.0607e-10	7.4836e-09
Novel00287	200.276	14.4341	3.7944	1.0714e-10	7.537e-09
ENSGALG00000040037	100.008	9.12851	3.4536	1.1071e-10	7.7652e-09
ENSGALG00000003045	879.284	209.375	2.0702	1.1996e-10	8.3892e-09
ENSGALG00000012659	2002.45	484.466	2.0473	1.225e-10	8.5413e-09
Novel01983	141.963	18.7886	2.9176	1.2309e-10	8.5577e-09
Novel00809	102.5	10.2288	3.3249	1.2779e-10	8.8323e-09
ENSGALG00000008043	729.311	165.071	2.1434	1.3319e-10	9.1789e-09
ENSGALG00000040212	986	4085.87	-2.051	1.3373e-10	9.1893e-09
ENSGALG00000043511	335.861	66.0943	2.3453	1.396e-10	9.5648e-09
ENSGALG00000005071	624.77	3267.31	-2.3867	1.4185e-10	9.6353e-09
ENSGALG00000017272	1125.47	6784.51	-2.5917	1.4182e-10	9.6353e-09
ENSGALG00000038022	1196.58	52.6356	4.5067	1.4373e-10	9.7351e-09
Novel00244	135.244	3.85297	5.1335	1.4551e-10	9.8002e-09
ENSGALG00000035144	91.6791	434.475	-2.2446	1.4905e-10	1.001e-08
ENSGALG00000015360	327.704	63.3842	2.3702	1.5262e-10	1.0187e-08
ENSGALG00000037511	1688.83	253.958	2.7334	1.5298e-10	1.0187e-08
ENSGALG00000017229	318.073	58.5966	2.4405	1.5431e-10	1.0247e-08
ENSGALG00000002103	1106.71	7379.96	-2.7373	1.5512e-10	1.0272e-08
ENSGALG00000015511	276.685	44.2514	2.6444	1.6644e-10	1.0938e-08
ENSGALG00000009628	973.901	235.563	2.0477	1.6884e-10	1.1027e-08
ENSGALG00000028283	8.79361	188.945	-4.4254	1.7116e-10	1.1117e-08
ENSGALG00000005616	183.324	7.91627	4.5334	2.0318e-10	1.3018e-08
ENSGALG00000003484	164.003	24.2145	2.7598	2.1512e-10	1.3672e-08
ENSGALG00000010202	186.994	786.05	-2.0716	2.2021e-10	1.3959e-08
ENSGALG00000008713	331.124	66.5542	2.3148	2.303e-10	1.4521e-08
ENSGALG00000029596	248.803	45.8878	2.4388	2.3555e-10	1.4812e-08
ENSGALG00000011309	213.944	38.3552	2.4797	2.4636e-10	1.5449e-08
ENSGALG00000012952	285.138	45.1214	2.6598	2.4698e-10	1.5449e-08
Novel01131	277.076	52.3767	2.4033	2.5257e-10	1.5757e-08
ENSGALG00000040736	50.1051	1.16027	5.4324	2.5511e-10	1.5873e-08
ENSGALG00000006507	432.362	94.1758	2.1988	2.6675e-10	1.6512e-08
ENSGALG00000031274	174.674	27.0852	2.6891	2.9235e-10	1.7955e-08
ENSGALG00000038313	297.907	7.72785	5.2686	3.0326e-10	1.8529e-08
ENSGALG00000006717	148.464	3.84254	5.2719	3.408e-10	2.0664e-08
ENSGALG00000012546	896.733	221.548	2.0171	3.4261e-10	2.072e-08
Novel02031	268.252	53.3801	2.3292	3.5089e-10	2.1167e-08
ENSGALG00000000684	319.489	64.2903	2.3131	3.717e-10	2.2365e-08
ENSGALG00000029320	71.5166	344.399	-2.2677	4.0319e-10	2.4077e-08
ENSGALG00000030313	306.108	62.5175	2.2917	4.0162e-10	2.4077e-08
ENSGALG00000040385	441.044	45.3396	3.2821	4.031e-10	2.4077e-08
ENSGALG00000039448	626.831	148.442	2.0782	4.1106e-10	2.4423e-08
ENSGALG00000032984	1264.76	287.603	2.1367	4.2246e-10	2.4976e-08
ENSGALG00000008716	280.17	56.1917	2.3179	4.2926e-10	2.5314e-08
ENSGALG00000004515	519.475	120.015	2.1138	4.3494e-10	2.546e-08
ENSGALG00000040007	173.315	28.2084	2.6192	4.3286e-10	2.546e-08
Novel03290	41.2948	0.401012	6.6862	4.3485e-10	2.546e-08
ENSGALG00000041246	416.501	90.5455	2.2016	4.4413e-10	2.5934e-08
ENSGALG00000032193	256.231	1050.91	-2.0361	4.5451e-10	2.6474e-08
ENSGALG00000011252	102.474	11.2931	3.1817	4.6746e-10	2.7096e-08
ENSGALG00000001491	202.729	36.3258	2.4805	5.2601e-10	3.0341e-08
ENSGALG00000015822	463.609	74.4692	2.6382	5.4601e-10	3.1342e-08
ENSGALG00000029724	239.641	45.355	2.4015	5.5762e-10	3.1931e-08
ENSGALG00000002033	2593.85	10884	-2.069	5.6698e-10	3.2389e-08
ENSGALG00000016896	73.2528	349.826	-2.2557	5.6949e-10	3.2454e-08
ENSGALG00000010029	36.5577	843.982	-4.529	5.846e-10	3.3146e-08
ENSGALG00000021180	41.8818	460.602	-3.4591	5.8362e-10	3.3146e-08
ENSGALG00000035476	319.962	67.9815	2.2347	5.8582e-10	3.3146e-08
ENSGALG00000004897	254.94	49.0518	2.3778	5.9745e-10	3.3493e-08
ENSGALG00000039576	304.886	62.4469	2.2876	5.9479e-10	3.3493e-08
ENSGALG00000025743	282.487	56.1336	2.3312	5.9946e-10	3.3517e-08
ENSGALG00000035099	210.368	14.0574	3.9035	6.6319e-10	3.682e-08
ENSGALG00000032157	5.51986	72.1143	-3.7076	6.8206e-10	3.7713e-08
ENSGALG00000008953	479.059	1961.5	-2.0337	7.122e-10	3.9084e-08
ENSGALG00000031597	10861.4	1446.39	2.9087	7.221e-10	3.9535e-08
Novel01973	43.6389	0.808973	5.7534	7.4194e-10	4.0528e-08
ENSGALG00000035757	55.6319	276.687	-2.3143	7.9442e-10	4.3097e-08
ENSGALG00000008188	170.129	28.4153	2.5819	8.3101e-10	4.4775e-08
ENSGALG00000040833	329.034	69.3335	2.2466	8.4072e-10	4.4889e-08
ENSGALG00000008040	230.019	4459.59	-4.2771	8.5723e-10	4.5668e-08
ENSGALG00000043597	136.188	19.7017	2.7892	8.7379e-10	4.6342e-08
ENSGALG00000034312	13.6361	108.165	-2.9877	9.1829e-10	4.8594e-08
Novel01168	72.4137	5.05826	3.8395	1.008e-09	5.3105e-08
ENSGALG00000011663	8578.72	835.633	3.3598	1.0362e-09	5.4347e-08
ENSGALG00000035923	94.1693	424.635	-2.1729	1.06e-09	5.5359e-08
ENSGALG00000038343	72.864	339.21	-2.2189	1.0601e-09	5.5359e-08
ENSGALG00000034301	78.9369	6.97206	3.501	1.0993e-09	5.7278e-08
ENSGALG00000007665	210.495	39.78	2.4037	1.1156e-09	5.7997e-08
ENSGALG00000014753	257.218	52.231	2.3	1.13e-09	5.862e-08
ENSGALG00000009157	238.217	46.1997	2.3663	1.1348e-09	5.8739e-08
ENSGALG00000001727	583.494	37.1381	3.9737	1.1395e-09	5.8856e-08
ENSGALG00000008912	52.6257	450.675	-3.0982	1.1673e-09	6.0028e-08
ENSGALG00000036447	303.909	64.821	2.2291	1.2091e-09	6.1908e-08
ENSGALG00000004687	181.094	32.274	2.4883	1.3129e-09	6.6507e-08
ENSGALG00000017128	182.767	32.6334	2.4856	1.3267e-09	6.7063e-08
ENSGALG00000001632	200.946	37.4478	2.4239	1.4615e-09	7.3409e-08
ENSGALG00000015712	181.41	31.0466	2.5467	1.5402e-09	7.7197e-08
Novel00905	176.859	32.0544	2.464	1.5546e-09	7.7755e-08
ENSGALG00000039206	191.177	832.055	-2.1218	1.5944e-09	7.9574e-08
ENSGALG00000030209	1332.49	38.8972	5.0983	1.6505e-09	8.2202e-08
ENSGALG00000005223	49.8595	2.00853	4.6337	1.7299e-09	8.5977e-08
Novel00337	3.38021	1474.59	-8.769	1.7859e-09	8.8573e-08
ENSGALG00000016889	360.673	82.0735	2.1357	1.8002e-09	8.9099e-08
ENSGALG00000041323	283.675	60.1149	2.2384	1.8369e-09	9.0533e-08
ENSGALG00000019175	45.8163	468.412	-3.3538	1.8794e-09	9.2198e-08
ENSGALG00000025886	72.5583	5.85803	3.6307	1.8823e-09	9.2198e-08
ENSGALG00000039154	81.4368	2.19573	5.2129	1.8782e-09	9.2198e-08
ENSGALG00000038411	165.513	28.5505	2.5354	1.9672e-09	9.5764e-08
ENSGALG00000006658	180.072	32.1653	2.485	2.0335e-09	9.8788e-08
ENSGALG00000010195	372.614	85.6988	2.1203	2.1259e-09	1.0285e-07
ENSGALG00000011281	162.135	27.8385	2.542	2.39e-09	1.1423e-07
ENSGALG00000011275	176.969	31.4488	2.4924	2.4165e-09	1.1527e-07
ENSGALG00000015363	269.221	57.4791	2.2277	2.4817e-09	1.179e-07
Novel01240	1424.24	6250.2	-2.1337	2.5169e-09	1.191e-07
ENSGALG00000013999	216.858	1173.53	-2.436	2.545e-09	1.1995e-07
ENSGALG00000002346	277.21	59.9427	2.2093	2.598e-09	1.2221e-07
ENSGALG00000016511	151.141	25.4997	2.5673	2.7629e-09	1.2945e-07
ENSGALG00000042303	98.4044	5.98979	4.0381	2.8818e-09	1.3475e-07
ENSGALG00000037943	102.481	13.1629	2.9608	2.8971e-09	1.352e-07
Novel02136	197.308	37.7263	2.3868	2.9418e-09	1.3701e-07
ENSGALG00000003123	1378.63	277.579	2.3123	3.0465e-09	1.4161e-07
Novel03083	455.044	111.978	2.0228	3.0558e-09	1.4177e-07
Novel01464	40.6743	0.802023	5.6643	3.0805e-09	1.4264e-07
ENSGALG00000009149	1569.14	379.168	2.0491	3.2182e-09	1.4843e-07
ENSGALG00000016426	79.8744	494.878	-2.6313	3.326e-09	1.5311e-07
ENSGALG00000002303	53.465	2.81751	4.2461	3.428e-09	1.5719e-07
ENSGALG00000006563	749.151	185.972	2.0102	3.4476e-09	1.5738e-07
Novel01463	62.6046	1.60752	5.2834	3.4519e-09	1.5738e-07
ENSGALG00000010881	683.831	2804.75	-2.0362	3.4807e-09	1.5838e-07
ENSGALG00000011040	110.332	15.2593	2.8541	3.5733e-09	1.6228e-07
ENSGALG00000021520	204.899	41.5044	2.3036	3.7732e-09	1.7071e-07
ENSGALG00000011250	86.0957	9.65903	3.156	3.8574e-09	1.7388e-07
ENSGALG00000036519	175.909	29.6205	2.5702	4.0137e-09	1.8021e-07
ENSGALG00000041375	304.674	59.4643	2.3572	4.075e-09	1.8262e-07
ENSGALG00000014213	381.667	93.5366	2.0287	4.2759e-09	1.9126e-07
ENSGALG00000039343	78.7711	8.42018	3.2257	4.4038e-09	1.9661e-07
ENSGALG00000000560	316.819	72.6542	2.1245	4.4178e-09	1.9687e-07
ENSGALG00000026301	134.296	21.9678	2.6119	4.6454e-09	2.0662e-07
ENSGALG00000042863	729.505	3129.4	-2.1009	4.9548e-09	2.1997e-07
ENSGALG00000016692	210.304	43.4181	2.2761	5.9581e-09	2.606e-07
ENSGALG00000024481	292.235	65.8608	2.1496	6.0694e-09	2.645e-07
ENSGALG00000007335	224.47	1002.93	-2.1596	6.4443e-09	2.793e-07
ENSGALG00000007768	260.272	57.7054	2.1732	6.4362e-09	2.793e-07
ENSGALG00000013604	152.856	27.2585	2.4874	6.5661e-09	2.8354e-07
Novel00318	1244.71	5932.65	-2.2529	6.6305e-09	2.858e-07
ENSGALG00000006842	154.272	701.056	-2.184	6.8175e-09	2.9333e-07
Novel01740	137.089	23.0461	2.5725	6.9353e-09	2.9732e-07
ENSGALG00000043768	23997.9	109192	-2.1859	7.0239e-09	2.9999e-07
ENSGALG00000028975	565.512	98.5522	2.5206	7.5724e-09	3.2057e-07
Novel00892	46.3698	1.88025	4.6242	7.8993e-09	3.3262e-07
ENSGALG00000031240	43.1549	208.319	-2.2712	8.3072e-09	3.4918e-07
ENSGALG00000016931	181.966	35.4381	2.3603	8.4507e-09	3.5356e-07
ENSGALG00000010628	2312.12	20554.1	-3.1521	1.0048e-08	4.1646e-07
ENSGALG00000031054	90.3557	369.192	-2.0307	1.0307e-08	4.2642e-07
ENSGALG00000013900	19.53	128.19	-2.7145	1.201e-08	4.8753e-07
ENSGALG00000005258	42.8794	1.56128	4.7795	1.2272e-08	4.9733e-07
ENSGALG00000026600	622.472	145.822	2.0938	1.2355e-08	4.9984e-07
ENSGALG00000033214	74.3858	2.55051	4.8662	1.2715e-08	5.1353e-07
Novel01822	56.431	3.72121	3.9226	1.2895e-08	5.1991e-07
ENSGALG00000035194	327.281	79.2756	2.0456	1.3057e-08	5.2465e-07
ENSGALG00000013811	332.396	80.809	2.0403	1.3195e-08	5.2839e-07
ENSGALG00000016721	286.575	42.622	2.7492	1.3926e-08	5.5485e-07
ENSGALG00000036316	149.591	651.077	-2.1218	1.4188e-08	5.6434e-07
ENSGALG00000031397	898.85	5155.91	-2.5201	1.4641e-08	5.7946e-07
ENSGALG00000013830	111.884	576.343	-2.3649	1.5457e-08	6.1073e-07
ENSGALG00000003660	100.598	14.4053	2.8039	1.579e-08	6.2078e-07
ENSGALG00000025778	77.9285	8.93436	3.1247	1.5904e-08	6.2422e-07
ENSGALG00000020976	37.9234	326.775	-3.1071	1.6084e-08	6.2921e-07
Novel02362	0.468995	273.381	-9.1871	1.6293e-08	6.3633e-07
ENSGALG00000016767	175.103	35.4822	2.303	1.641e-08	6.3984e-07
ENSGALG00000032628	196.657	31.5634	2.6394	1.6631e-08	6.4742e-07
ENSGALG00000031524	138.373	24.1185	2.5204	1.6955e-08	6.5578e-07
ENSGALG00000032803	20.1752	135.226	-2.7447	1.7035e-08	6.5774e-07
ENSGALG00000003473	303.148	49.4967	2.6146	1.725e-08	6.6496e-07
ENSGALG00000021230	148.754	28.3539	2.3913	1.8223e-08	6.9679e-07
Novel00847	19.0135	202.097	-3.41	1.9513e-08	7.4373e-07
ENSGALG00000031119	128.014	22.0083	2.5402	1.9623e-08	7.4553e-07
Novel02501	715.49	18423.3	-4.6865	1.9623e-08	7.4553e-07
ENSGALG00000043518	276.299	63.6072	2.119	2.0624e-08	7.8106e-07
ENSGALG00000037453	281.955	67.9514	2.0529	2.169e-08	8.1494e-07
ENSGALG00000039384	200.955	43.6052	2.2043	2.1691e-08	8.1494e-07
ENSGALG00000039676	57.1528	4.32908	3.7227	2.1663e-08	8.1494e-07
ENSGALG00000003881	212.424	47.5727	2.1587	2.4339e-08	9.0298e-07
ENSGALG00000038134	148.536	28.466	2.3835	2.5779e-08	9.5046e-07
ENSGALG00000029151	688.76	15.9019	5.4367	2.5868e-08	9.5227e-07
ENSGALG00000028710	289.916	71.7778	2.014	2.6555e-08	9.7453e-07
ENSGALG00000008538	306.557	76.3645	2.0052	2.8141e-08	1.0311e-06
ENSGALG00000027454	236.564	54.9804	2.1052	2.8914e-08	1.0578e-06
ENSGALG00000016859	2.85593	1031.38	-8.4964	2.967e-08	1.0838e-06
ENSGALG00000016875	138.342	733.01	-2.4056	3.1368e-08	1.1405e-06
Novel00516	123.313	0.808973	7.252	3.1954e-08	1.1601e-06
Novel01342	70.9114	1.16375	5.9292	3.3071e-08	1.197e-06
ENSGALG00000011683	248.717	59.6388	2.0602	3.7388e-08	1.343e-06
ENSGALG00000034258	200.32	828.372	-2.048	3.823e-08	1.3711e-06
ENSGALG00000002707	72.389	8.15318	3.1503	3.9307e-08	1.4034e-06
Novel01609	335.045	21.0837	3.9902	4.0303e-08	1.4368e-06
Novel02798	3229.79	14728.4	-2.1891	4.4106e-08	1.5653e-06
ENSGALG00000012541	43.0777	1310.15	-4.9266	4.4654e-08	1.58e-06
ENSGALG00000026534	194.294	44.152	2.1377	5.0693e-08	1.7751e-06
Novel00969	0.34526	27.96	-6.3395	5.0934e-08	1.781e-06
ENSGALG00000019003	263.168	63.1691	2.0587	5.2305e-08	1.8199e-06
ENSGALG00000030610	65.096	5.145	3.6613	5.2433e-08	1.8199e-06
ENSGALG00000041202	418.789	12136.9	-4.857	5.2714e-08	1.827e-06
ENSGALG00000012658	544.994	3833.09	-2.8142	5.4921e-08	1.8992e-06
ENSGALG00000034616	184.961	40.5902	2.188	5.4957e-08	1.8992e-06
ENSGALG00000041752	200.811	1353.13	-2.7524	5.589e-08	1.9287e-06
ENSGALG00000016157	80.1077	9.77338	3.035	5.8922e-08	2.0245e-06
ENSGALG00000002282	243.734	59.7752	2.0277	5.9089e-08	2.0272e-06
ENSGALG00000040426	499.575	2949.51	-2.5617	6.0011e-08	2.0529e-06
Novel02865	44.854	371.806	-3.0512	6.0885e-08	2.0798e-06
ENSGALG00000004437	235.13	57.0375	2.0435	6.1602e-08	2.0983e-06
ENSGALG00000014729	113.627	19.1908	2.5658	6.2077e-08	2.1114e-06
ENSGALG00000040263	148.962	30.1405	2.3052	6.4409e-08	2.1783e-06
ENSGALG00000001273	36.8084	1.20303	4.9353	6.7387e-08	2.2509e-06
Novel01592	31.3602	0.401012	6.2891	6.8514e-08	2.2845e-06
ENSGALG00000032465	16.7809	101.461	-2.596	6.9394e-08	2.3106e-06
ENSGALG00000012160	199.488	46.4863	2.1014	7.0596e-08	2.344e-06
ENSGALG00000037671	453.127	50.79	3.1573	7.5043e-08	2.4709e-06
ENSGALG00000014646	341.083	72.1278	2.2415	7.5298e-08	2.4759e-06
ENSGALG00000038251	110.391	18.6592	2.5647	7.572e-08	2.4863e-06
Novel00085	449.92	91.8465	2.2924	7.6808e-08	2.515e-06
ENSGALG00000032664	696.627	2839.18	-2.027	8.0196e-08	2.6224e-06
ENSGALG00000041713	17.3976	120.805	-2.7957	8.0925e-08	2.6413e-06
ENSGALG00000018276	0.814075	31.8118	-5.2883	8.1968e-08	2.6656e-06
ENSGALG00000032184	83.3034	11.4988	2.8569	8.3133e-08	2.6961e-06
ENSGALG00000034232	111.037	18.8927	2.5551	8.6193e-08	2.7877e-06
ENSGALG00000005007	89.3601	457.493	-2.356	9.0631e-08	2.9232e-06
ENSGALG00000030887	81.6154	2.59327	4.976	9.2931e-08	2.9893e-06
ENSGALG00000032558	54.085	4.6908	3.5273	9.6611e-08	3.0993e-06
ENSGALG00000037387	99.18	13.6392	2.8623	9.8463e-08	3.1417e-06
ENSGALG00000020726	37.2592	187.55	-2.3316	1.0108e-07	3.221e-06
ENSGALG00000010001	207.191	32.5628	2.6697	1.0169e-07	3.236e-06
ENSGALG00000042375	53.8625	4.57294	3.5581	1.0286e-07	3.2686e-06
ENSGALG00000035772	165.769	31.6268	2.39	1.0433e-07	3.3065e-06
Novel00102	9.0663	71.9907	-2.9892	1.0746e-07	3.3876e-06
ENSGALG00000009837	214.208	52.0924	2.0399	1.0834e-07	3.4063e-06
Novel03091	70.1622	8.13806	3.1079	1.0862e-07	3.4063e-06
ENSGALG00000007205	7974.45	36358.1	-2.1888	1.1049e-07	3.4511e-06
Novel01960	64.3433	7.12815	3.1742	1.118e-07	3.4783e-06
ENSGALG00000027963	2654.86	14062.7	-2.4052	1.1226e-07	3.4879e-06
ENSGALG00000031340	135.981	27.9461	2.2827	1.1353e-07	3.5135e-06
ENSGALG00000020554	164.49	36.9083	2.156	1.1433e-07	3.5337e-06
ENSGALG00000041043	259.658	1629.55	-2.6498	1.2136e-07	3.7269e-06
ENSGALG00000037696	37.7096	162.284	-2.1055	1.3697e-07	4.1629e-06
ENSGALG00000033516	172.708	39.5177	2.1278	1.384e-07	4.1905e-06
Novel00365	35.7621	1.20651	4.8895	1.3948e-07	4.2176e-06
ENSGALG00000019967	159.627	34.8165	2.1969	1.4093e-07	4.2561e-06
ENSGALG00000042866	30.4271	150.109	-2.3026	1.4293e-07	4.3111e-06
ENSGALG00000034680	5348.22	51342.1	-3.263	1.5227e-07	4.5754e-06
ENSGALG00000032313	1174.81	223.154	2.3963	1.5853e-07	4.7334e-06
ENSGALG00000031112	22734.5	5647.88	2.0091	1.6208e-07	4.821e-06
Novel01401	58.2997	303.407	-2.3797	1.7069e-07	5.058e-06
ENSGALG00000010125	120.367	23.3142	2.3682	1.7198e-07	5.09e-06
ENSGALG00000037029	228.778	1923.77	-3.0719	1.8119e-07	5.351e-06
ENSGALG00000002955	203.346	892.68	-2.1342	1.862e-07	5.4836e-06
ENSGALG00000027973	45.9746	2.95847	3.9579	1.908e-07	5.6051e-06
ENSGALG00000038721	808.384	5133.81	-2.6669	1.9452e-07	5.6933e-06
ENSGALG00000007218	32.3789	149.074	-2.2029	1.9531e-07	5.7093e-06
ENSGALG00000042263	9.1776	69.9855	-2.9309	2.0474e-07	5.9409e-06
ENSGALG00000038740	105.243	5.0421	4.3835	2.0516e-07	5.946e-06
ENSGALG00000012220	130.505	26.9696	2.2747	2.1852e-07	6.2794e-06
Novel02775	939.715	112.102	3.0674	2.1835e-07	6.2794e-06
Novel02824	125.173	25.7273	2.2826	2.23e-07	6.4003e-06
ENSGALG00000015403	669.724	158.298	2.0809	2.4392e-07	6.9585e-06
ENSGALG00000035309	1153.14	198.379	2.5392	2.4645e-07	7.0138e-06
ENSGALG00000034648	88.0779	14.2919	2.6236	2.5889e-07	7.3414e-06
ENSGALG00000023464	141.374	30.6722	2.2045	2.633e-07	7.4576e-06
ENSGALG00000002477	179.663	36.7176	2.2907	2.6535e-07	7.4888e-06
ENSGALG00000006639	119.829	22.8161	2.3929	2.6516e-07	7.4888e-06
ENSGALG00000031267	0	21.746	#NAME?	2.8573e-07	8.0068e-06
ENSGALG00000036466	1373.07	320.122	2.1007	2.8643e-07	8.017e-06
Novel01420	224.742	1.16722	7.589	2.968e-07	8.278e-06
ENSGALG00000028069	46.762	3.534	3.726	3.0529e-07	8.5047e-06
ENSGALG00000031242	582.449	5060.98	-3.1192	3.0582e-07	8.5094e-06
Novel00186	121.975	11.4237	3.4165	3.2141e-07	8.9011e-06
ENSGALG00000033925	91.9453	15.4557	2.5726	3.2503e-07	8.9702e-06
Novel01996	53.224	4.51281	3.56	3.2707e-07	9.0057e-06
ENSGALG00000043568	116.59	622.244	-2.416	3.3577e-07	9.2024e-06
ENSGALG00000013776	131.568	28.6002	2.2017	3.3987e-07	9.2933e-06
ENSGALG00000034054	48.5332	4.2505	3.5133	3.4755e-07	9.4924e-06
ENSGALG00000033591	53.3134	4.73704	3.4924	3.4865e-07	9.5004e-06
ENSGALG00000007160	44.8944	184.918	-2.0423	3.5045e-07	9.5387e-06
ENSGALG00000039801	109.539	440.962	-2.0092	3.5102e-07	9.5433e-06
ENSGALG00000008671	142.926	25.726	2.474	3.6881e-07	9.9357e-06
ENSGALG00000040184	145.023	32.7375	2.1473	3.8322e-07	1.0242e-05
ENSGALG00000041054	66.2197	8.32996	2.9909	3.8299e-07	1.0242e-05
ENSGALG00000042597	146.941	5.37149	4.7738	3.8898e-07	1.0385e-05
ENSGALG00000006341	30.4314	0.805498	5.2395	3.9517e-07	1.0514e-05
Novel01389	63.2705	7.91852	2.9982	3.9886e-07	1.0601e-05
Novel01961	102.239	14.0771	2.8605	4.0274e-07	1.0692e-05
Novel00609	58.3491	6.35724	3.1982	4.0434e-07	1.0722e-05
ENSGALG00000013056	237.232	1401.67	-2.5628	4.1404e-07	1.0943e-05
ENSGALG00000043806	101.702	18.6511	2.447	4.1731e-07	1.1017e-05
ENSGALG00000032618	135.786	30.0078	2.1779	4.3946e-07	1.1576e-05
ENSGALG00000028279	6.66712	55.5072	-3.0575	4.6262e-07	1.2119e-05
Novel00956	53.9111	5.61764	3.2625	4.6536e-07	1.2163e-05
ENSGALG00000010478	150.332	34.6778	2.1161	4.7737e-07	1.2395e-05
ENSGALG00000042568	201.731	32.2682	2.6442	4.8018e-07	1.2455e-05
Novel03166	163.342	39.3432	2.0537	4.8168e-07	1.248e-05
Novel02961	116.723	24.4363	2.256	4.8242e-07	1.2485e-05
ENSGALG00000015089	43.0238	2.37373	4.1799	4.9079e-07	1.2688e-05
ENSGALG00000040297	4246.66	897.306	2.2427	4.9519e-07	1.2774e-05
ENSGALG00000043799	159.5	39.4369	2.0159	5.1023e-07	1.3148e-05
Novel00854	43.3674	3.04399	3.8326	5.1354e-07	1.319e-05
Novel00579	62.6873	7.50709	3.0618	5.3624e-07	1.3743e-05
ENSGALG00000029380	27.6697	125.337	-2.1794	5.5065e-07	1.4037e-05
Novel00839	79.9846	7.50136	3.4145	5.559e-07	1.4125e-05
Novel02952	114.11	23.5131	2.2789	5.8073e-07	1.4677e-05
ENSGALG00000036840	594.667	3952.25	-2.7325	5.8139e-07	1.4678e-05
ENSGALG00000008420	1154.47	4822.27	-2.0625	6.2447e-07	1.5716e-05
Novel02761	18789.3	122315	-2.7026	6.4598e-07	1.6223e-05
ENSGALG00000037533	71.149	8.21332	3.1148	6.4751e-07	1.6244e-05
ENSGALG00000000839	93.9001	15.4639	2.6022	6.8229e-07	1.7062e-05
ENSGALG00000016288	26.7982	0.401012	6.0623	6.8639e-07	1.7147e-05
ENSGALG00000040759	2066.05	242.646	3.09	6.9185e-07	1.7265e-05
ENSGALG00000041352	174.559	5627.67	-5.0108	6.9412e-07	1.7285e-05
ENSGALG00000007917	230.633	40.9633	2.4932	7.2316e-07	1.7933e-05
ENSGALG00000011008	53.0375	5.87192	3.1751	7.3108e-07	1.8092e-05
ENSGALG00000042030	1189.38	219.699	2.4366	7.3355e-07	1.8115e-05
Novel01866	38.715	2.36331	4.034	7.3524e-07	1.8138e-05
Novel01467	46.2394	3.66802	3.656	7.6219e-07	1.8705e-05
ENSGALG00000009601	294.425	50.6791	2.5384	7.7118e-07	1.8887e-05
ENSGALG00000029072	145.399	34.7598	2.0645	7.7246e-07	1.8899e-05
Novel00364	227.821	56.1548	2.0204	7.7356e-07	1.8906e-05
ENSGALG00000001955	6.15508	52.8562	-3.1022	7.9473e-07	1.9363e-05
ENSGALG00000005407	3546.82	16981.9	-2.2594	8.3574e-07	2.0258e-05
Novel00868	35.8061	244.799	-2.7733	8.6137e-07	2.0859e-05
Novel01414	21.8789	190.002	-3.1184	8.6811e-07	2.0957e-05
ENSGALG00000034109	96.9706	18.6061	2.3818	8.7994e-07	2.12e-05
ENSGALG00000010163	129.965	28.1483	2.207	8.8423e-07	2.1282e-05
ENSGALG00000011419	44.5061	3.76049	3.565	9.0271e-07	2.1704e-05
ENSGALG00000005763	224.519	15.7887	3.8299	9.4124e-07	2.2585e-05
ENSGALG00000011314	24.6088	262.581	-3.4155	9.6527e-07	2.3115e-05
Novel00437	82.3602	15.0548	2.4517	9.7996e-07	2.3443e-05
ENSGALG00000034322	59.1081	436.395	-2.8842	9.9313e-07	2.3686e-05
ENSGALG00000041456	14.4338	90.4569	-2.6478	1.03e-06	2.4491e-05
ENSGALG00000036763	81.6025	14.1706	2.5257	1.0737e-06	2.5454e-05
ENSGALG00000038136	31.1516	1.16722	4.7382	1.0945e-06	2.5843e-05
ENSGALG00000040771	132.11	29.393	2.1682	1.0968e-06	2.5872e-05
ENSGALG00000037717	162.523	40.1636	2.0167	1.1044e-06	2.6026e-05
Novel00937	27.7826	120.623	-2.1183	1.1187e-06	2.6336e-05
ENSGALG00000029527	67.3482	2.37373	4.8264	1.1345e-06	2.6629e-05
ENSGALG00000038217	1775.09	414.119	2.0998	1.1509e-06	2.6987e-05
ENSGALG00000030645	968.469	4948.57	-2.3532	1.1704e-06	2.7418e-05
ENSGALG00000010386	59.1648	7.3927	3.0006	1.2193e-06	2.8479e-05
ENSGALG00000040553	224.705	2888.38	-3.6842	1.2373e-06	2.8815e-05
Novel01227	479.911	87.1087	2.4619	1.2541e-06	2.9119e-05
ENSGALG00000001605	25.4899	116.379	-2.1908	1.2579e-06	2.9175e-05
ENSGALG00000010623	91.6077	17.8826	2.3569	1.2595e-06	2.9175e-05
ENSGALG00000004660	123.978	28.2986	2.1313	1.3165e-06	3.0389e-05
ENSGALG00000036915	100.033	19.8148	2.3358	1.3189e-06	3.041e-05
ENSGALG00000006421	80.2376	11.2469	2.8348	1.3693e-06	3.1395e-05
ENSGALG00000015151	107.94	22.3295	2.2732	1.3827e-06	3.161e-05
ENSGALG00000008369	1135.41	6217.28	-2.4531	1.4208e-06	3.2419e-05
Novel00472	41.2204	3.57677	3.5266	1.4619e-06	3.3228e-05
ENSGALG00000031403	4376.67	66491.7	-3.9253	1.4817e-06	3.355e-05
ENSGALG00000016438	143.475	35.3378	2.0215	1.4843e-06	3.3577e-05
ENSGALG00000005801	115.264	25.1956	2.1937	1.5917e-06	3.5836e-05
ENSGALG00000030397	75.9372	12.6879	2.5814	1.5996e-06	3.5945e-05
ENSGALG00000008080	88.1545	11.003	3.0021	1.6821e-06	3.741e-05
ENSGALG00000023396	94.5695	9.17249	3.366	1.7258e-06	3.8238e-05
ENSGALG00000005077	74.1295	545.403	-2.8792	1.7511e-06	3.8761e-05
Novel01868	163.01	1.56823	6.6997	1.8469e-06	4.0693e-05
Novel00886	117.552	6.75478	4.1212	1.9367e-06	4.2473e-05
Novel02114	56.2419	7.33031	2.9397	1.9738e-06	4.3207e-05
ENSGALG00000036165	6.93024	50.3705	-2.8616	2.0679e-06	4.5142e-05
Novel03257	376.365	1811.27	-2.2668	2.1093e-06	4.5918e-05
ENSGALG00000043381	71.7309	12.2719	2.5472	2.1711e-06	4.7177e-05
ENSGALG00000028026	1145.03	4977.45	-2.12	2.2204e-06	4.8159e-05
Novel00644	21.5306	198.564	-3.2051	2.236e-06	4.8454e-05
ENSGALG00000043762	131.229	32.5168	2.0128	2.3052e-06	4.9818e-05
Novel00600	151.176	35.496	2.0905	2.3789e-06	5.1038e-05
ENSGALG00000007216	35.1381	2.38068	3.8836	2.4366e-06	5.218e-05
Novel00376	0.579757	23.3905	-5.3343	2.4714e-06	5.2783e-05
Novel01235	642.462	135.689	2.2433	2.5054e-06	5.3364e-05
ENSGALG00000033960	75.2355	13.1098	2.5208	2.5991e-06	5.5064e-05
Novel00533	58.595	3.88878	3.9134	2.6361e-06	5.5698e-05
Novel00038	78.7325	15.0698	2.3853	2.7798e-06	5.8578e-05
ENSGALG00000012505	96.4939	20.3615	2.2446	2.7907e-06	5.8757e-05
ENSGALG00000038629	42.4846	3.79978	3.483	2.8123e-06	5.9105e-05
ENSGALG00000034272	100.594	21.8696	2.2015	2.8225e-06	5.9253e-05
ENSGALG00000011291	240.567	1727.69	-2.8443	2.8822e-06	6.0255e-05
ENSGALG00000008909	1357.25	6206.27	-2.193	2.9301e-06	6.104e-05
ENSGALG00000011623	398.281	85.2216	2.2245	3.1614e-06	6.5456e-05
ENSGALG00000002277	1151.12	4624.08	-2.0061	3.3723e-06	6.9399e-05
ENSGALG00000033373	33.4174	1.91953	4.1218	3.3854e-06	6.9608e-05
Novel01607	27.3549	0	Inf	3.414e-06	7.0135e-05
ENSGALG00000039224	26.5982	0.802023	5.0515	3.5288e-06	7.2305e-05
ENSGALG00000002507	52.934	6.72018	2.9776	3.6358e-06	7.4242e-05
ENSGALG00000011914	111.979	25.4036	2.1401	3.6966e-06	7.5302e-05
ENSGALG00000030836	53.1257	6.98596	2.9269	3.8133e-06	7.7466e-05
ENSGALG00000008436	693.32	2793.89	-2.0107	3.8623e-06	7.8393e-05
Novel01783	13.8311	70.4569	-2.3488	3.9998e-06	8.1045e-05
ENSGALG00000030164	1637.29	6828.71	-2.0603	4.0483e-06	8.1889e-05
ENSGALG00000016569	92.9841	19.0486	2.2873	4.074e-06	8.2338e-05
ENSGALG00000034615	506.614	3299.76	-2.7034	4.087e-06	8.2531e-05
ENSGALG00000037206	131.286	530.634	-2.015	4.2141e-06	8.4807e-05
[truncated: 722 more rows]

## Sheet: E16 vs 10w
Gene_id	readcount_H_E16_F	readcount_H_10w_F	log2FoldChange	pval	padj
[truncated: 1,913 more rows]

[truncated: 1 more sheets: 1d vs 10w]
