# Supplementary material for: Transcriptomic profile of leg muscle during early growth and development in Haiyang yellow chicken
Source: Copernicus journal article supplement (doi:10.5194/aab-64-405-2021), 2021-09-20
Supplement: Supplementary file 3 [file Table S3.xlsx]

## Sheet: sheet 1
Table S3 The common differentially expressed genes identified in four pairwise comparisons: E12 vs. E16, E16 vs. 1 d, 1 d vs. 10 w and E12 vs. 10 w
Gene_id		readcount_H_1d_F	readcount_H_10w_F	log2FoldChange	pval	padj
ENSGALG00000008601	AHSG – alpha 2-HS glycoprotein	272.948	1.80771	7.2383	7.376e-22	3.3364e-19
ENSGALG00000028710		67.5617	654.727	-3.2766	9.0368e-21	3.8646e-18
ENSGALG00000008439	CD36 – CD36 molecule	15504.2	2576.36	2.5892	2.0498e-17	5.5419e-15
ENSGALG00000032404	MYH1C – myosin, heavy chain 1C, skeletal muscle	2462.9	41174.5	-4.0633	2.4382e-17	6.517e-15
ENSGALG00000013900	MAP7 – microtubule associated protein 7	120.717	2.80856	5.4257	4.9802e-17	1.2462e-14
ENSGALG00000041043	ABRA – actin binding Rho activating protein	1535.99	12322.7	-3.0041	6.0703e-16	1.2748e-13
ENSGALG00000005043	ACACB – acetyl-CoA carboxylase beta	6571.47	1091.32	2.5901	2.0021e-10	1.7974e-08
ENSGALG00000027703		70.9758	8.23867	3.1068	5.0093e-08	2.9456e-06
ENSGALG00000012594	NTRK2 – neurotrophic receptor tyrosine kinase 2	8.6427	65.4067	-2.9199	5.9059e-07	2.6826e-05
ENSGALG00000019175	LOC418544 – cystathionine beta-synthase-like	441.167	82.9865	2.4104	1.5653e-06	6.4029e-05
ENSGALG00000037050	FABP3 – fatty acid binding protein 3	106246	15617.9	2.7661	2.6279e-06	0.00010067
ENSGALG00000008040	LOC417013 – putative acyl-CoA dehydrogenase AidB-like	4197.8	630.933	2.7341	3.7584e-06	0.00013642
ENSGALG00000010628	ACSL1 – acyl-CoA synthetase long chain family member 1	19349.5	4369.65	2.1467	5.691e-06	0.00019627
ENSGALG00000002988	PHGDH – phosphoglycerate dehydrogenase	121.617	15.9336	2.9322	1.1312e-05	0.00035572
ENSGALG00000040501		24.6587	1.69857	3.8597	6.1671e-05	0.0015063
ENSGALG00000000839	WNT11 – Wnt family member 11	14.5437	59.9938	-2.0444	0.00012425	0.002794
ENSGALG00000043739		0	13.5951	#NAME?	0.00014462	0.0031614
Novel01117		3.33216	25.9869	-2.9633	0.00048004	0.0087869
Novel00182		2.60664	21.0796	-3.0156	0.0010876	0.017169
Novel01911		10.3096	59.4104	-2.5267	0.0029559	0.038055
ENSGALG00000040220	TWIST3 – Twist homlog 3	12.4158	0.805911	3.9454	0.004039	0.048793
ENSGALG00000039571	PRPH – peripherin	1.47797	14.9229	-3.3358	0.0041066	0.049383
