# Supplementary material for: Transcriptomic profile of leg muscle during early growth and development in Haiyang yellow chicken
Source: Copernicus journal article supplement (doi:10.5194/aab-64-405-2021), 2021-09-20
Supplement: Supplementary file 4 [file Table S4.xls]

## Sheet: E12 vs E16
GO_accession	Description	Term_type	Over_represented_pValue	Corrected_pValue	DEG_item	DEG_list	Bg_item	Bg_list	Gene_names
GO:0003012	muscle system process	biological_process	5.85e-14	2.1e-10	47	1067	185	14096	ENSGALG00000004044,ENSGALG00000006572,ENSGALG00000003521,ENSGALG00000006273,ENSGALG00000002845,ENSGALG00000018946,ENSGALG00000014182,ENSGALG00000016281,ENSGALG00000007409,ENSGALG00000009089,ENSGALG00000008805,ENSGALG00000038884,ENSGALG00000010357,ENSGALG00000021272,ENSGALG00000034716,ENSGALG00000008486,ENSGALG00000038787,Novel01024,ENSGALG00000005088,ENSGALG00000039458,ENSGALG00000006591,ENSGALG0…
GO:0006936	muscle contraction	biological_process	2.5e-13	7.47e-10	41	1067	151	14096	ENSGALG00000019157,ENSGALG00000002125,ENSGALG00000014695,ENSGALG00000001416,ENSGALG00000014463,ENSGALG00000006835,ENSGALG00000040479,ENSGALG00000004376,ENSGALG00000014848,ENSGALG00000014813,ENSGALG00000008177,ENSGALG00000015018,ENSGALG00000027583,ENSGALG00000015142,ENSGALG00000016342,ENSGALG00000001021,ENSGALG00000029694,ENSGALG00000012783,ENSGALG00000014847,Novel01312,ENSGALG00000008351,ENSGALG0…
GO:0009888	tissue development	biological_process	2.29e-12	5.87e-09	151	1067	1149	14096	ENSGALG00000015519,ENSGALG00000042657,ENSGALG00000026557,ENSGALG00000016707,ENSGALG00000027583,ENSGALG00000015142,ENSGALG00000003553,ENSGALG00000004249,ENSGALG00000013193,ENSGALG00000007817,ENSGALG00000012775,ENSGALG00000012873,ENSGALG00000038813,ENSGALG00000013968,ENSGALG00000032282,ENSGALG00000016157,ENSGALG00000006775,ENSGALG00000029270,ENSGALG00000037687,ENSGALG00000008969,ENSGALG00000010825,…
GO:0006811	ion transport	biological_process	1.51e-10	3.37e-07	132	1067	1011	14096	ENSGALG00000012869,ENSGALG00000015126,Novel00652,ENSGALG00000041640,ENSGALG00000007179,ENSGALG00000016448,ENSGALG00000041932,ENSGALG00000003647,ENSGALG00000004373,ENSGALG00000003778,ENSGALG00000001698,ENSGALG00000000367,ENSGALG00000014994,ENSGALG00000002132,Novel01551,ENSGALG00000017168,ENSGALG00000005621,ENSGALG00000031997,ENSGALG00000014695,ENSGALG00000009050,ENSGALG00000012117,ENSGALG000000201…
GO:0034765	regulation of ion transmembrane transport	biological_process	1.8e-10	3.59e-07	43	1067	195	14096	ENSGALG00000027771,ENSGALG00000009638,ENSGALG00000014873,ENSGALG00000043764,ENSGALG00000016281,ENSGALG00000007409,ENSGALG00000011009,ENSGALG00000034895,ENSGALG00000006922,ENSGALG00000034427,ENSGALG00000017168,ENSGALG00000043287,ENSGALG00000000367,ENSGALG00000014994,ENSGALG00000002132,ENSGALG00000004373,ENSGALG00000012155,ENSGALG00000031754,ENSGALG00000010204,ENSGALG00000008486,ENSGALG00000016448,…
GO:0034762	regulation of transmembrane transport	biological_process	2.43e-10	4.35e-07	44	1067	206	14096	ENSGALG00000004980,ENSGALG00000008351,ENSGALG00000001512,ENSGALG00000014813,ENSGALG00000016707,ENSGALG00000027583,ENSGALG00000012594,ENSGALG00000015018,ENSGALG00000042657,ENSGALG00000007623,ENSGALG00000029694,ENSGALG00000014463,ENSGALG00000020505,ENSGALG00000004376,ENSGALG00000003911,ENSGALG00000014848,ENSGALG00000014695,ENSGALG00000006190,ENSGALG00000008456,ENSGALG00000021272,ENSGALG00000004721,…
GO:0006941	striated muscle contraction	biological_process	4.76e-10	7.76e-07	24	1067	73	14096	ENSGALG00000043287,ENSGALG00000029694,ENSGALG00000015018,ENSGALG00000008177,ENSGALG00000006591,ENSGALG00000027583,ENSGALG00000015142,ENSGALG00000014813,ENSGALG00000012790,ENSGALG00000008486,ENSGALG00000008351,ENSGALG00000021272,ENSGALG00000001416,ENSGALG00000007409,ENSGALG00000009089,ENSGALG00000019157,ENSGALG00000016281,ENSGALG00000006273,ENSGALG00000002845,ENSGALG00000003521,ENSGALG00000004376,…
GO:0060429	epithelium development	biological_process	6.52e-10	9.74e-07	94	1067	656	14096	ENSGALG00000006379,ENSGALG00000039040,ENSGALG00000042422,ENSGALG00000014227,ENSGALG00000000616,ENSGALG00000016102,ENSGALG00000032039,ENSGALG00000011889,ENSGALG00000006503,ENSGALG00000008702,ENSGALG00000036255,ENSGALG00000002988,ENSGALG00000029301,ENSGALG00000010867,ENSGALG00000022557,ENSGALG00000000902,ENSGALG00000031997,ENSGALG00000010936,ENSGALG00000028091,ENSGALG00000035777,ENSGALG00000001518,…
GO:0043588	skin development	biological_process	1.04e-09	1.43e-06	28	1067	100	14096	ENSGALG00000041066,ENSGALG00000038848,ENSGALG00000011355,ENSGALG00000004804,ENSGALG00000002775,ENSGALG00000026862,ENSGALG00000002389,ENSGALG00000000839,ENSGALG00000032702,ENSGALG00000016680,ENSGALG00000031862,ENSGALG00000010133,ENSGALG00000037687,ENSGALG00000038495,ENSGALG00000028115,ENSGALG00000000902,ENSGALG00000008702,ENSGALG00000014624,ENSGALG00000011889,ENSGALG00000035157,ENSGALG00000001405,…
GO:0043269	regulation of ion transport	biological_process	1.21e-09	1.55e-06	54	1067	299	14096	ENSGALG00000043764,ENSGALG00000002015,ENSGALG00000016281,ENSGALG00000007409,Novel00652,ENSGALG00000041640,ENSGALG00000009638,ENSGALG00000008231,ENSGALG00000014873,ENSGALG00000010357,ENSGALG00000027771,ENSGALG00000006922,ENSGALG00000034427,ENSGALG00000034895,ENSGALG00000011009,ENSGALG00000004373,ENSGALG00000014994,ENSGALG00000000367,ENSGALG00000002132,ENSGALG00000017168,ENSGALG00000043287,ENSGALG0…
GO:0008544	epidermis development	biological_process	1.34e-09	1.6e-06	30	1067	115	14096	ENSGALG00000010935,ENSGALG00000002775,ENSGALG00000038848,ENSGALG00000041066,ENSGALG00000004804,ENSGALG00000011355,ENSGALG00000029270,ENSGALG00000037687,ENSGALG00000038495,ENSGALG00000028115,ENSGALG00000031997,ENSGALG00000000902,ENSGALG00000031862,ENSGALG00000010133,ENSGALG00000011889,ENSGALG00000041470,ENSGALG00000002108,ENSGALG00000016707,ENSGALG00000008702,ENSGALG00000014624,ENSGALG00000001518,…
GO:0003008	system process	biological_process	2.61e-09	2.75e-06	110	1067	835	14096	ENSGALG00000010357,ENSGALG00000009089,ENSGALG00000008805,ENSGALG00000038884,ENSGALG00000006997,ENSGALG00000006273,ENSGALG00000003521,ENSGALG00000002845,ENSGALG00000015126,ENSGALG00000027415,ENSGALG00000032702,ENSGALG00000014994,ENSGALG00000009498,ENSGALG00000000367,ENSGALG00000002907,ENSGALG00000017168,ENSGALG00000006591,ENSGALG00000005554,ENSGALG00000039837,ENSGALG00000008486,ENSGALG00000038787,…
GO:0048736	appendage development	biological_process	3.74e-09	3.53e-06	34	1067	148	14096	ENSGALG00000009724,ENSGALG00000041640,ENSGALG00000036082,ENSGALG00000015013,ENSGALG00000014873,ENSGALG00000005123,ENSGALG00000002389,ENSGALG00000000839,ENSGALG00000039238,ENSGALG00000040276,ENSGALG00000023640,ENSGALG00000029140,ENSGALG00000038540,ENSGALG00000009129,ENSGALG00000009415,ENSGALG00000007324,ENSGALG00000003647,ENSGALG00000038848,ENSGALG00000031960,ENSGALG00000009270,ENSGALG00000016680,…
GO:0061436	establishment of skin barrier	biological_process	8.73e-09	7.82e-06	8	1067	9	14096	ENSGALG00000026862,ENSGALG00000016102,ENSGALG00000038495,ENSGALG00000004249,ENSGALG00000028115,ENSGALG00000003553,ENSGALG00000007324,ENSGALG00000000902
GO:0060173	limb development	biological_process	1.18e-08	1.01e-05	33	1067	147	14096	ENSGALG00000038540,ENSGALG00000003647,ENSGALG00000007324,ENSGALG00000009129,ENSGALG00000009415,ENSGALG00000036082,ENSGALG00000015013,ENSGALG00000014873,ENSGALG00000009724,ENSGALG00000041640,ENSGALG00000039238,ENSGALG00000040276,ENSGALG00000023640,ENSGALG00000029140,ENSGALG00000005123,ENSGALG00000002389,ENSGALG00000032039,ENSGALG00000042657,ENSGALG00000035237,ENSGALG00000001079,ENSGALG00000003283,…
GO:0009913	epidermal cell differentiation	biological_process	2.65e-08	1.98e-05	25	1067	95	14096	ENSGALG00000011889,ENSGALG00000016707,ENSGALG00000008702,ENSGALG00000014624,ENSGALG00000012790,ENSGALG00000003647,ENSGALG00000003553,ENSGALG00000042422,ENSGALG00000007324,ENSGALG00000001405,ENSGALG00000016102,ENSGALG00000034716,ENSGALG00000002775,ENSGALG00000010935,ENSGALG00000038848,ENSGALG00000041066,ENSGALG00000004804,ENSGALG00000029270,ENSGALG00000037687,ENSGALG00000028115,ENSGALG00000038495,…
GO:0044057	regulation of system process	biological_process	3.35e-08	2.4e-05	44	1067	243	14096	ENSGALG00000001021,ENSGALG00000029694,ENSGALG00000008177,ENSGALG00000015018,ENSGALG00000027583,ENSGALG00000015142,ENSGALG00000012790,ENSGALG00000038512,Novel01312,ENSGALG00000008351,ENSGALG00000001416,ENSGALG00000008456,ENSGALG00000015410,ENSGALG00000007114,ENSGALG00000014984,ENSGALG00000012419,ENSGALG00000006835,ENSGALG00000007668,ENSGALG00000004376,ENSGALG00000000367,ENSGALG00000014994,ENSGALG0…
GO:0033561	regulation of water loss via skin	biological_process	3.99e-08	2.75e-05	8	1067	10	14096	ENSGALG00000007324,ENSGALG00000003553,ENSGALG00000000902,ENSGALG00000004249,ENSGALG00000038495,ENSGALG00000028115,ENSGALG00000026862,ENSGALG00000016102
GO:0086009	membrane repolarization	biological_process	4.56e-08	3.03e-05	12	1067	24	14096	ENSGALG00000001512,ENSGALG00000008486,ENSGALG00000034895,ENSGALG00000008351,ENSGALG00000009995,ENSGALG00000004376,ENSGALG00000014873,ENSGALG00000043287,ENSGALG00000029694,ENSGALG00000007409,ENSGALG00000007666,ENSGALG00000015018
GO:0030855	epithelial cell differentiation	biological_process	8.05e-08	4.81e-05	57	1067	366	14096	ENSGALG00000039238,ENSGALG00000013085,ENSGALG00000004747,ENSGALG00000003285,ENSGALG00000028115,ENSGALG00000038495,ENSGALG00000005123,ENSGALG00000001097,ENSGALG00000038311,ENSGALG00000010133,ENSGALG00000031862,ENSGALG00000000839,ENSGALG00000014873,ENSGALG00000010935,ENSGALG00000016281,ENSGALG00000041066,ENSGALG00000004804,ENSGALG00000009724,ENSGALG00000003647,ENSGALG00000007324,ENSGALG00000009129,…
GO:0006812	cation transport	biological_process	9.2e-08	5.16e-05	91	1067	692	14096	ENSGALG00000002132,Novel01551,ENSGALG00000000367,ENSGALG00000017168,ENSGALG00000023834,ENSGALG00000004373,ENSGALG00000003778,ENSGALG00000016448,ENSGALG00000008486,ENSGALG00000016791,ENSGALG00000003647,ENSGALG00000010204,ENSGALG00000005088,Novel01423,ENSGALG00000012155,ENSGALG00000031754,ENSGALG00000021272,ENSGALG00000007179,ENSGALG00000008593,ENSGALG00000004721,ENSGALG00000009638,ENSGALG000000388…
GO:0044707	single-multicellular organism process	biological_process	9.48e-08	5.16e-05	334	1067	3487	14096	ENSGALG00000012644,ENSGALG00000038512,ENSGALG00000004980,ENSGALG00000015094,ENSGALG00000009274,ENSGALG00000031122,ENSGALG00000012595,ENSGALG00000012790,ENSGALG00000039101,ENSGALG00000038848,ENSGALG00000003374,ENSGALG00000006258,ENSGALG00000003126,ENSGALG00000002775,ENSGALG00000036798,ENSGALG00000031960,ENSGALG00000016680,ENSGALG00000003217,ENSGALG00000010826,ENSGALG00000042354,ENSGALG00000013822,…
GO:1903522	regulation of blood circulation	biological_process	1.14e-07	5.61e-05	28	1067	122	14096	ENSGALG00000008486,ENSGALG00000038787,ENSGALG00000012790,ENSGALG00000038512,ENSGALG00000021272,ENSGALG00000034716,ENSGALG00000008351,ENSGALG00000000367,ENSGALG00000029694,ENSGALG00000043287,ENSGALG00000008177,ENSGALG00000015018,ENSGALG00000015142,ENSGALG00000027583,ENSGALG00000002845,ENSGALG00000003521,ENSGALG00000014984,ENSGALG00000012419,ENSGALG00000034895,ENSGALG00000004044,ENSGALG00000002944,…
GO:0006937	regulation of muscle contraction	biological_process	1.16e-07	5.61e-05	22	1067	81	14096	ENSGALG00000014182,ENSGALG00000006273,ENSGALG00000002845,ENSGALG00000004376,ENSGALG00000006572,ENSGALG00000006835,ENSGALG00000001416,ENSGALG00000007409,ENSGALG00000016281,Novel01024,ENSGALG00000038787,ENSGALG00000012790,ENSGALG00000008486,ENSGALG00000008351,ENSGALG00000021272,Novel01312,ENSGALG00000043287,ENSGALG00000001021,ENSGALG00000029694,ENSGALG00000015018,ENSGALG00000015142,ENSGALG000000275…
GO:0051146	striated muscle cell differentiation	biological_process	1.16e-07	5.61e-05	32	1067	154	14096	ENSGALG00000015018,ENSGALG00000014813,ENSGALG00000001021,ENSGALG00000042657,ENSGALG00000038813,ENSGALG00000016102,ENSGALG00000013968,ENSGALG00000008351,ENSGALG00000001977,ENSGALG00000006379,ENSGALG00000002125,ENSGALG00000015410,ENSGALG00000009050,ENSGALG00000026081,ENSGALG00000010936,ENSGALG00000019719,ENSGALG00000031960,ENSGALG00000014463,ENSGALG00000029301,ENSGALG00000034716,ENSGALG00000005292,…
GO:0050891	multicellular organismal water homeostasis	biological_process	1.21e-07	5.62e-05	11	1067	22	14096	ENSGALG00000006202,ENSGALG00000016680,ENSGALG00000016102,ENSGALG00000026862,ENSGALG00000038495,ENSGALG00000015128,ENSGALG00000004249,ENSGALG00000028115,ENSGALG00000003553,ENSGALG00000000902,ENSGALG00000007324
GO:0034220	ion transmembrane transport	biological_process	1.25e-07	5.62e-05	80	1067	589	14096	ENSGALG00000012298,ENSGALG00000003911,ENSGALG00000004376,ENSGALG00000009705,ENSGALG00000014463,ENSGALG00000020505,ENSGALG00000000394,ENSGALG00000006190,ENSGALG00000007269,ENSGALG00000009758,ENSGALG00000008456,ENSGALG00000006202,ENSGALG00000033002,ENSGALG00000011405,ENSGALG00000004980,ENSGALG00000001512,ENSGALG00000002728,Novel00960,ENSGALG00000027583,ENSGALG00000013627,ENSGALG00000016707,ENSGALG0…
GO:0060047	heart contraction	biological_process	2.26e-07	9.18e-05	26	1067	112	14096	ENSGALG00000014873,ENSGALG00000001416,ENSGALG00000008456,ENSGALG00000015410,ENSGALG00000007409,ENSGALG00000016281,ENSGALG00000000498,ENSGALG00000002845,ENSGALG00000003521,ENSGALG00000014848,ENSGALG00000003886,ENSGALG00000034895,ENSGALG00000004376,ENSGALG00000004044,ENSGALG00000029694,ENSGALG00000043287,ENSGALG00000008177,ENSGALG00000015018,ENSGALG00000015142,ENSGALG00000027583,ENSGALG00000008486,…
GO:0055001	muscle cell development	biological_process	2.31e-07	9.18e-05	24	1067	99	14096	ENSGALG00000015018,ENSGALG00000014813,ENSGALG00000034716,ENSGALG00000008351,ENSGALG00000038813,ENSGALG00000013968,ENSGALG00000017122,ENSGALG00000005292,ENSGALG00000001977,ENSGALG00000008805,ENSGALG00000009089,ENSGALG00000016281,ENSGALG00000002125,ENSGALG00000009050,ENSGALG00000015410,ENSGALG00000003886,ENSGALG00000019719,ENSGALG00000004044,ENSGALG00000010936,ENSGALG00000014463,ENSGALG00000031960,…
GO:0090257	regulation of muscle system process	biological_process	2.37e-07	9.23e-05	25	1067	105	14096	ENSGALG00000004376,ENSGALG00000006572,ENSGALG00000006835,ENSGALG00000014182,ENSGALG00000006273,ENSGALG00000002845,ENSGALG00000038884,ENSGALG00000007409,ENSGALG00000016281,ENSGALG00000001416,ENSGALG00000008351,ENSGALG00000021272,Novel01312,ENSGALG00000038787,ENSGALG00000005088,Novel01024,ENSGALG00000012790,ENSGALG00000008486,ENSGALG00000015018,ENSGALG00000027583,ENSGALG00000015142,ENSGALG000000432…
GO:0003015	heart process	biological_process	2.7e-07	9.59e-05	26	1067	113	14096	ENSGALG00000000498,ENSGALG00000007409,ENSGALG00000016281,ENSGALG00000008456,ENSGALG00000015410,ENSGALG00000014873,ENSGALG00000001416,ENSGALG00000034895,ENSGALG00000003886,ENSGALG00000004044,ENSGALG00000004376,ENSGALG00000014848,ENSGALG00000002845,ENSGALG00000003521,ENSGALG00000008177,ENSGALG00000015018,ENSGALG00000027583,ENSGALG00000015142,ENSGALG00000029694,ENSGALG00000043287,ENSGALG00000034716,…
GO:0035113	embryonic appendage morphogenesis	biological_process	2.73e-07	9.59e-05	25	1067	106	14096	ENSGALG00000009274,ENSGALG00000035725,ENSGALG00000006379,ENSGALG00000007562,ENSGALG00000007324,ENSGALG00000009129,ENSGALG00000016102,ENSGALG00000032039,ENSGALG00000035237,ENSGALG00000038540,ENSGALG00000001079,ENSGALG00000037687,ENSGALG00000039238,ENSGALG00000040276,ENSGALG00000029140,ENSGALG00000009270,ENSGALG00000031960,ENSGALG00000005123,ENSGALG00000000839,ENSGALG00000007668,ENSGALG00000015013,…
GO:0060537	muscle tissue development	biological_process	2.96e-07	9.82e-05	43	1067	249	14096	ENSGALG00000016309,ENSGALG00000004044,ENSGALG00000006273,ENSGALG00000003521,ENSGALG00000011086,ENSGALG00000009089,ENSGALG00000042851,ENSGALG00000016281,ENSGALG00000001449,ENSGALG00000041640,ENSGALG00000009724,ENSGALG00000014873,ENSGALG00000034716,ENSGALG00000005292,ENSGALG00000007324,ENSGALG00000039458,ENSGALG00000010881,ENSGALG00000043287,ENSGALG00000001006,ENSGALG00000014463,ENSGALG00000031960,…
GO:0055085	transmembrane transport	biological_process	3.06e-07	9.82e-05	103	1067	839	14096	ENSGALG00000011009,Novel00127,ENSGALG00000016744,ENSGALG00000034895,ENSGALG00000004778,ENSGALG00000006922,ENSGALG00000034427,ENSGALG00000006421,ENSGALG00000027771,ENSGALG00000015055,ENSGALG00000014873,ENSGALG00000030834,Novel00044,ENSGALG00000016281,ENSGALG00000043764,ENSGALG00000009265,ENSGALG00000007666,ENSGALG00000004613,ENSGALG00000007409,ENSGALG00000006172,ENSGALG00000002621,ENSGALG000000099…
GO:0008015	blood circulation	biological_process	3.07e-07	9.82e-05	41	1067	233	14096	ENSGALG00000015142,ENSGALG00000027583,ENSGALG00000010290,ENSGALG00000008177,ENSGALG00000015018,ENSGALG00000029694,ENSGALG00000017122,ENSGALG00000038512,ENSGALG00000008351,ENSGALG00000012790,ENSGALG00000001416,ENSGALG00000015410,ENSGALG00000008456,ENSGALG00000015301,ENSGALG00000012419,ENSGALG00000004376,ENSGALG00000003886,ENSGALG00000014984,ENSGALG00000014848,ENSGALG00000016313,ENSGALG00000005554,…
GO:0003013	circulatory system process	biological_process	3.44e-07	0.0001081	41	1067	234	14096	ENSGALG00000014984,ENSGALG00000014848,ENSGALG00000015301,ENSGALG00000012419,ENSGALG00000004376,ENSGALG00000003886,ENSGALG00000001416,ENSGALG00000015410,ENSGALG00000008456,ENSGALG00000012790,ENSGALG00000017122,ENSGALG00000038512,ENSGALG00000008351,ENSGALG00000029694,ENSGALG00000027583,ENSGALG00000015142,ENSGALG00000008177,ENSGALG00000015018,ENSGALG00000010290,ENSGALG00000002845,ENSGALG00000013085,…
GO:0086001	cardiac muscle cell action potential	biological_process	3.55e-07	0.0001081	12	1067	27	14096	ENSGALG00000004376,ENSGALG00000008351,ENSGALG00000034895,ENSGALG00000021272,ENSGALG00000012790,ENSGALG00000008486,ENSGALG00000002845,ENSGALG00000015142,ENSGALG00000016281,ENSGALG00000007409,ENSGALG00000029694,ENSGALG00000043287
GO:0030001	metal ion transport	biological_process	3.56e-07	0.0001081	70	1067	502	14096	ENSGALG00000020505,ENSGALG00000009705,ENSGALG00000014463,ENSGALG00000004376,ENSGALG00000003911,ENSGALG00000012298,ENSGALG00000006190,ENSGALG00000006202,ENSGALG00000032282,ENSGALG00000008456,ENSGALG00000004980,ENSGALG00000001512,ENSGALG00000039712,ENSGALG00000027583,Novel00960,ENSGALG00000042657,Novel01463,ENSGALG00000029694,ENSGALG00000007623,ENSGALG00000006922,ENSGALG00000034427,ENSGALG000000348…
GO:0042692	muscle cell differentiation	biological_process	3.62e-07	0.0001081	40	1067	228	14096	ENSGALG00000001977,ENSGALG00000006379,ENSGALG00000016102,ENSGALG00000013968,ENSGALG00000038813,ENSGALG00000008351,ENSGALG00000017122,ENSGALG00000013999,ENSGALG00000001021,ENSGALG00000042657,ENSGALG00000015018,ENSGALG00000014813,ENSGALG00000007114,ENSGALG00000029301,ENSGALG00000026081,ENSGALG00000010936,ENSGALG00000003886,ENSGALG00000019719,ENSGALG00000031960,ENSGALG00000014463,ENSGALG00000015410,…
GO:0060306	regulation of membrane repolarization	biological_process	3.74e-07	0.00010978	10	1067	19	14096	ENSGALG00000008351,ENSGALG00000034895,ENSGALG00000009995,ENSGALG00000004376,ENSGALG00000008486,ENSGALG00000015018,ENSGALG00000007409,ENSGALG00000043287,ENSGALG00000029694,ENSGALG00000014873
GO:0042391	regulation of membrane potential	biological_process	4.24e-07	0.0001225	37	1067	200	14096	ENSGALG00000034427,ENSGALG00000005123,ENSGALG00000027415,ENSGALG00000025971,ENSGALG00000034895,ENSGALG00000002845,ENSGALG00000011009,ENSGALG00000007409,ENSGALG00000007666,ENSGALG00000009265,ENSGALG00000016281,ENSGALG00000014873,ENSGALG00000038672,ENSGALG00000000745,ENSGALG00000010598,ENSGALG00000021272,ENSGALG00000009995,ENSGALG00000008486,ENSGALG00000016313,ENSGALG00000000367,ENSGALG00000043287,…
GO:0035107	appendage morphogenesis	biological_process	4.37e-07	0.0001242	27	1067	123	14096	ENSGALG00000006379,ENSGALG00000009274,ENSGALG00000035725,ENSGALG00000007562,ENSGALG00000007324,ENSGALG00000009129,ENSGALG00000016102,ENSGALG00000032039,ENSGALG00000042657,ENSGALG00000035237,ENSGALG00000001079,ENSGALG00000038540,ENSGALG00000039238,ENSGALG00000037687,ENSGALG00000040276,ENSGALG00000029140,ENSGALG00000005123,ENSGALG00000031960,ENSGALG00000009270,ENSGALG00000007668,ENSGALG00000000839,…
GO:0055002	striated muscle cell development	biological_process	4.79e-07	0.0001339	22	1067	89	14096	ENSGALG00000031960,ENSGALG00000014463,ENSGALG00000004044,ENSGALG00000010936,ENSGALG00000019719,ENSGALG00000003521,ENSGALG00000018946,ENSGALG00000011086,ENSGALG00000002125,ENSGALG00000016281,ENSGALG00000009089,ENSGALG00000008805,ENSGALG00000015410,ENSGALG00000009050,ENSGALG00000038813,ENSGALG00000013968,ENSGALG00000008351,ENSGALG00000034716,ENSGALG00000001977,ENSGALG00000005292,ENSGALG00000014813,…
GO:0030216	keratinocyte differentiation	biological_process	4.86e-07	0.0001339	17	1067	56	14096	ENSGALG00000004804,ENSGALG00000041066,ENSGALG00000038848,ENSGALG00000000902,ENSGALG00000028115,ENSGALG00000038495,ENSGALG00000037687,ENSGALG00000031862,ENSGALG00000011889,ENSGALG00000014624,ENSGALG00000008702,ENSGALG00000003647,ENSGALG00000007324,ENSGALG00000003553,ENSGALG00000012790,ENSGALG00000016102,ENSGALG00000001405
GO:0032501	multicellular organismal process	biological_process	6.71e-07	0.00017429	339	1067	3600	14096	ENSGALG00000042422,ENSGALG00000031615,ENSGALG00000035725,ENSGALG00000006544,ENSGALG00000016102,ENSGALG00000042388,ENSGALG00000011889,ENSGALG00000004274,ENSGALG00000032039,ENSGALG00000012594,ENSGALG00000014848,ENSGALG00000034458,ENSGALG00000029301,ENSGALG00000008697,ENSGALG00000009700,ENSGALG00000003582,ENSGALG00000015410,ENSGALG00000005088,ENSGALG00000012155,ENSGALG00000008486,ENSGALG00000020788,…
GO:0001655	urogenital system development	biological_process	6.81e-07	0.00017441	39	1067	222	14096	ENSGALG00000030879,ENSGALG00000042045,ENSGALG00000007324,ENSGALG00000030991,ENSGALG00000005554,ENSGALG00000015466,ENSGALG00000011358,ENSGALG00000038540,ENSGALG00000015166,ENSGALG00000000839,ENSGALG00000032702,ENSGALG00000009302,ENSGALG00000002389,ENSGALG00000001097,ENSGALG00000013085,ENSGALG00000039238,ENSGALG00000004747,ENSGALG00000009724,ENSGALG00000000498,ENSGALG00000001449,ENSGALG00000040582,…
GO:0002027	regulation of heart rate	biological_process	8.43e-07	0.00021269	16	1067	51	14096	ENSGALG00000021272,ENSGALG00000034716,ENSGALG00000008351,ENSGALG00000008486,ENSGALG00000012790,ENSGALG00000015018,ENSGALG00000027583,ENSGALG00000015142,ENSGALG00000043287,ENSGALG00000029694,ENSGALG00000004376,ENSGALG00000002845,ENSGALG00000003521,ENSGALG00000007409,ENSGALG00000016281,ENSGALG00000015410
GO:0030326	embryonic limb morphogenesis	biological_process	8.74e-07	0.00021457	24	1067	105	14096	ENSGALG00000037687,ENSGALG00000039238,ENSGALG00000040276,ENSGALG00000029140,ENSGALG00000005123,ENSGALG00000009270,ENSGALG00000031960,ENSGALG00000007668,ENSGALG00000014873,ENSGALG00000015013,ENSGALG00000038848,ENSGALG00000041640,ENSGALG00000009724,ENSGALG00000006379,ENSGALG00000035725,ENSGALG00000009274,ENSGALG00000007562,ENSGALG00000007324,ENSGALG00000009129,ENSGALG00000016102,ENSGALG00000032039,…
GO:0014706	striated muscle tissue development	biological_process	1.17e-06	0.00027721	40	1067	235	14096	ENSGALG00000039458,ENSGALG00000010881,ENSGALG00000001006,ENSGALG00000043287,ENSGALG00000034716,ENSGALG00000005292,ENSGALG00000016281,ENSGALG00000009089,ENSGALG00000009724,ENSGALG00000041640,ENSGALG00000014873,ENSGALG00000004044,ENSGALG00000016309,ENSGALG00000006273,ENSGALG00000003521,ENSGALG00000011086,ENSGALG00000014813,ENSGALG00000027583,ENSGALG00000015142,ENSGALG00000042657,ENSGALG00000001021,…
GO:0008016	regulation of heart contraction	biological_process	1.18e-06	0.00027721	22	1067	92	14096	ENSGALG00000043287,ENSGALG00000029694,ENSGALG00000015018,ENSGALG00000008177,ENSGALG00000015142,ENSGALG00000027583,ENSGALG00000012790,ENSGALG00000008486,ENSGALG00000034716,ENSGALG00000008351,ENSGALG00000021272,ENSGALG00000008456,ENSGALG00000015410,ENSGALG00000014873,ENSGALG00000001416,ENSGALG00000007409,ENSGALG00000016281,ENSGALG00000002845,ENSGALG00000003521,ENSGALG00000034895,ENSGALG00000004376,…
GO:0030239	myofibril assembly	biological_process	1.22e-06	0.00028399	14	1067	42	14096	ENSGALG00000018946,ENSGALG00000003521,ENSGALG00000001977,ENSGALG00000011086,ENSGALG00000014463,ENSGALG00000019719,ENSGALG00000008351,ENSGALG00000038813,ENSGALG00000004044,ENSGALG00000009050,ENSGALG00000009089,ENSGALG00000002125,ENSGALG00000015018,ENSGALG00000008805
GO:0035108	limb morphogenesis	biological_process	1.3e-06	0.00029914	26	1067	122	14096	ENSGALG00000035725,ENSGALG00000009274,ENSGALG00000006379,ENSGALG00000007324,ENSGALG00000007562,ENSGALG00000009129,ENSGALG00000016102,ENSGALG00000042657,ENSGALG00000032039,ENSGALG00000035237,ENSGALG00000038540,ENSGALG00000001079,ENSGALG00000039238,ENSGALG00000037687,ENSGALG00000040276,ENSGALG00000029140,ENSGALG00000009270,ENSGALG00000031960,ENSGALG00000005123,ENSGALG00000016680,ENSGALG00000007668,…
GO:0061061	muscle structure development	biological_process	1.38e-06	0.0003083	53	1067	357	14096	ENSGALG00000034716,ENSGALG00000035845,ENSGALG00000005292,ENSGALG00000010881,ENSGALG00000039458,ENSGALG00000043287,ENSGALG00000001006,ENSGALG00000016309,ENSGALG00000012712,ENSGALG00000004044,ENSGALG00000000839,ENSGALG00000011086,ENSGALG00000011541,ENSGALG00000018946,ENSGALG00000006273,ENSGALG00000003521,ENSGALG00000041640,ENSGALG00000009724,ENSGALG00000008805,ENSGALG00000009089,ENSGALG00000016281,…
GO:0007517	muscle organ development	biological_process	1.79e-06	0.00038298	37	1067	213	14096	ENSGALG00000043727,ENSGALG00000028091,ENSGALG00000009050,ENSGALG00000015410,ENSGALG00000003126,ENSGALG00000003886,ENSGALG00000010936,ENSGALG00000031960,ENSGALG00000009270,ENSGALG00000029301,ENSGALG00000014813,ENSGALG00000001021,ENSGALG00000042657,ENSGALG00000006544,ENSGALG00000038813,ENSGALG00000016102,ENSGALG00000013968,ENSGALG00000017122,ENSGALG00000012790,ENSGALG00000006379,ENSGALG00000041640,…
GO:0006942	regulation of striated muscle contraction	biological_process	2.05e-06	0.00043226	15	1067	48	14096	ENSGALG00000012790,ENSGALG00000002845,ENSGALG00000008486,ENSGALG00000004376,ENSGALG00000006572,ENSGALG00000008351,ENSGALG00000021272,ENSGALG00000029694,ENSGALG00000043287,ENSGALG00000001416,ENSGALG00000027583,ENSGALG00000015142,ENSGALG00000015018,ENSGALG00000016281,ENSGALG00000007409
GO:0055117	regulation of cardiac muscle contraction	biological_process	3.21e-06	0.00064727	14	1067	44	14096	ENSGALG00000016281,ENSGALG00000007409,ENSGALG00000015142,ENSGALG00000027583,ENSGALG00000015018,ENSGALG00000001416,ENSGALG00000043287,ENSGALG00000029694,ENSGALG00000021272,ENSGALG00000004376,ENSGALG00000008351,ENSGALG00000008486,ENSGALG00000002845,ENSGALG00000012790
GO:0072001	renal system development	biological_process	3.56e-06	0.00070969	34	1067	193	14096	ENSGALG00000000498,ENSGALG00000009724,ENSGALG00000040582,ENSGALG00000001449,ENSGALG00000039238,ENSGALG00000013085,ENSGALG00000000839,ENSGALG00000032702,ENSGALG00000009302,ENSGALG00000002389,ENSGALG00000001097,ENSGALG00000005554,ENSGALG00000015466,ENSGALG00000015166,ENSGALG00000038540,ENSGALG00000011358,ENSGALG00000030991,ENSGALG00000042045,ENSGALG00000032282,ENSGALG00000036798,ENSGALG00000008969,…
GO:1903115	regulation of actin filament-based movement	biological_process	3.8e-06	0.0007477	11	1067	28	14096	ENSGALG00000008486,ENSGALG00000006273,ENSGALG00000002845,ENSGALG00000012790,ENSGALG00000021272,ENSGALG00000004376,ENSGALG00000043287,ENSGALG00000029694,ENSGALG00000007409,ENSGALG00000015142,ENSGALG00000027583
GO:0035878	nail development	biological_process	4.17e-06	0.0008026	6	1067	8	14096	ENSGALG00000023640,ENSGALG00000015013,ENSGALG00000036082,ENSGALG00000003647,ENSGALG00000002389,ENSGALG00000038848
GO:0060048	cardiac muscle contraction	biological_process	4.87e-06	0.00091817	16	1067	58	14096	ENSGALG00000016281,ENSGALG00000007409,ENSGALG00000001416,ENSGALG00000004376,ENSGALG00000004044,ENSGALG00000002845,ENSGALG00000003521,ENSGALG00000015142,ENSGALG00000027583,ENSGALG00000015018,ENSGALG00000043287,ENSGALG00000029694,ENSGALG00000021272,ENSGALG00000008351,ENSGALG00000008486,ENSGALG00000012790
GO:0072073	kidney epithelium development	biological_process	4.96e-06	0.00092664	23	1067	108	14096	ENSGALG00000042045,ENSGALG00000006379,ENSGALG00000013193,ENSGALG00000030991,ENSGALG00000011358,ENSGALG00000015466,ENSGALG00000005554,ENSGALG00000015519,ENSGALG00000012644,ENSGALG00000026557,ENSGALG00000001097,ENSGALG00000000839,ENSGALG00000016680,ENSGALG00000007668,ENSGALG00000010867,ENSGALG00000029301,ENSGALG00000013085,ENSGALG00000029270,ENSGALG00000039238,ENSGALG00000008969,ENSGALG00000040582,…
GO:0030104	water homeostasis	biological_process	5.24e-06	0.00095739	11	1067	30	14096	ENSGALG00000006202,ENSGALG00000026862,ENSGALG00000016102,ENSGALG00000016680,ENSGALG00000000902,ENSGALG00000003553,ENSGALG00000007324,ENSGALG00000038495,ENSGALG00000015128,ENSGALG00000028115,ENSGALG00000004249
GO:0048598	embryonic morphogenesis	biological_process	5.94e-06	0.0010652	58	1067	422	14096	ENSGALG00000028095,ENSGALG00000013193,ENSGALG00000004249,ENSGALG00000042422,ENSGALG00000007562,ENSGALG00000009274,ENSGALG00000035725,ENSGALG00000006379,ENSGALG00000016102,ENSGALG00000035867,ENSGALG00000012775,ENSGALG00000035879,ENSGALG00000013568,ENSGALG00000035237,ENSGALG00000032039,ENSGALG00000042657,ENSGALG00000008702,ENSGALG00000016707,ENSGALG00000001079,ENSGALG00000007114,ENSGALG00000000902,…
GO:0001822	kidney development	biological_process	7.17e-06	0.0012476	32	1067	182	14096	ENSGALG00000013085,ENSGALG00000039238,ENSGALG00000009302,ENSGALG00000001097,ENSGALG00000000839,ENSGALG00000032702,ENSGALG00000040582,ENSGALG00000001449,ENSGALG00000000498,ENSGALG00000009724,ENSGALG00000030991,ENSGALG00000042045,ENSGALG00000011358,ENSGALG00000015166,ENSGALG00000038540,ENSGALG00000005554,ENSGALG00000015466,ENSGALG00000010867,ENSGALG00000029270,ENSGALG00000029301,ENSGALG00000008969,…
GO:0048513	organ development	biological_process	9.01e-06	0.0015241	185	1067	1823	14096	ENSGALG00000034094,ENSGALG00000032282,ENSGALG00000039536,ENSGALG00000016157,ENSGALG00000000394,ENSGALG00000029270,ENSGALG00000037687,ENSGALG00000006775,ENSGALG00000008969,ENSGALG00000010825,ENSGALG00000003886,ENSGALG00000042657,ENSGALG00000015519,ENSGALG00000026557,ENSGALG00000016707,ENSGALG00000027583,ENSGALG00000015142,ENSGALG00000004631,ENSGALG00000013193,ENSGALG00000004249,ENSGALG00000003553,…
GO:0006813	potassium ion transport	biological_process	1.11e-05	0.0018508	27	1067	145	14096	ENSGALG00000043764,ENSGALG00000009265,ENSGALG00000006190,ENSGALG00000007666,Novel01117,ENSGALG00000006922,ENSGALG00000025971,ENSGALG00000020505,ENSGALG00000014463,ENSGALG00000004376,ENSGALG00000002132,ENSGALG00000043287,ENSGALG00000004373,ENSGALG00000015018,ENSGALG00000008177,ENSGALG00000016448,ENSGALG00000016791,ENSGALG00000006172,ENSGALG00000001512,ENSGALG00000031754,ENSGALG00000010204,ENSGALG0…
GO:0060993	kidney morphogenesis	biological_process	1.12e-05	0.0018629	18	1067	75	14096	ENSGALG00000011358,ENSGALG00000015166,ENSGALG00000012644,ENSGALG00000026557,ENSGALG00000042045,ENSGALG00000006379,ENSGALG00000013193,ENSGALG00000030991,ENSGALG00000009724,ENSGALG00000032282,ENSGALG00000001097,ENSGALG00000009302,ENSGALG00000000839,ENSGALG00000007668,ENSGALG00000029270,ENSGALG00000010867,ENSGALG00000029301,ENSGALG00000039238
GO:0045604	regulation of epidermal cell differentiation	biological_process	1.31e-05	0.0021463	11	1067	32	14096	ENSGALG00000034716,ENSGALG00000010133,ENSGALG00000000902,ENSGALG00000031997,ENSGALG00000007324,ENSGALG00000038495,ENSGALG00000028115,ENSGALG00000037687,ENSGALG00000008702,ENSGALG00000038848,ENSGALG00000011889
GO:0086004	regulation of cardiac muscle cell contraction	biological_process	1.36e-05	0.0022101	10	1067	26	14096	ENSGALG00000008486,ENSGALG00000002845,ENSGALG00000012790,ENSGALG00000021272,ENSGALG00000004376,ENSGALG00000029694,ENSGALG00000043287,ENSGALG00000007409,ENSGALG00000015142,ENSGALG00000027583
GO:0098655	cation transmembrane transport	biological_process	1.44e-05	0.0023176	56	1067	408	14096	ENSGALG00000003778,ENSGALG00000004373,ENSGALG00000017168,ENSGALG00000043287,ENSGALG00000000367,ENSGALG00000002132,ENSGALG00000004721,ENSGALG00000009995,ENSGALG00000007179,ENSGALG00000010598,ENSGALG00000021272,ENSGALG00000031754,ENSGALG00000010204,ENSGALG00000016448,ENSGALG00000008486,ENSGALG00000016791,ENSGALG00000043764,ENSGALG00000009265,ENSGALG00000016281,ENSGALG00000004613,ENSGALG00000007666,…
GO:0009790	embryo development	biological_process	1.45e-05	0.0023176	70	1067	552	14096	ENSGALG00000016707,ENSGALG00000042657,ENSGALG00000012775,ENSGALG00000035879,ENSGALG00000013193,ENSGALG00000004249,ENSGALG00000009274,ENSGALG00000038848,ENSGALG00000003126,ENSGALG00000001124,ENSGALG00000007668,ENSGALG00000031960,ENSGALG00000009270,ENSGALG00000016843,ENSGALG00000007114,ENSGALG00000029270,ENSGALG00000037687,ENSGALG00000001343,ENSGALG00000038540,ENSGALG00000009495,ENSGALG00000039458,…
GO:0048729	tissue morphogenesis	biological_process	1.65e-05	0.0025756	56	1067	415	14096	ENSGALG00000038225,ENSGALG00000001079,ENSGALG00000008702,ENSGALG00000026557,ENSGALG00000012644,ENSGALG00000042657,ENSGALG00000032039,ENSGALG00000012873,ENSGALG00000012775,ENSGALG00000013568,ENSGALG00000012790,ENSGALG00000004249,ENSGALG00000013193,ENSGALG00000006379,ENSGALG00000028091,ENSGALG00000003374,ENSGALG00000038848,ENSGALG00000032282,ENSGALG00000036798,ENSGALG00000001124,ENSGALG00000007668,…
GO:0086003	cardiac muscle cell contraction	biological_process	1.97e-05	0.0029994	10	1067	27	14096	ENSGALG00000029694,ENSGALG00000043287,ENSGALG00000007409,ENSGALG00000027583,ENSGALG00000015142,ENSGALG00000008486,ENSGALG00000002845,ENSGALG00000012790,ENSGALG00000021272,ENSGALG00000004376
GO:0071805	potassium ion transmembrane transport	biological_process	1.97e-05	0.0029994	22	1067	111	14096	ENSGALG00000006922,ENSGALG00000025971,ENSGALG00000014463,ENSGALG00000020505,ENSGALG00000004376,ENSGALG00000043764,ENSGALG00000009265,ENSGALG00000007666,ENSGALG00000006190,ENSGALG00000016791,ENSGALG00000016448,ENSGALG00000001512,ENSGALG00000031754,ENSGALG00000010204,ENSGALG00000010598,ENSGALG00000004980,ENSGALG00000004721,ENSGALG00000009995,ENSGALG00000002132,ENSGALG00000043287,ENSGALG00000004373,…
GO:0086002	cardiac muscle cell action potential involved in contraction	biological_process	2.24e-05	0.0033728	9	1067	22	14096	ENSGALG00000008486,ENSGALG00000002845,ENSGALG00000012790,ENSGALG00000021272,ENSGALG00000004376,ENSGALG00000029694,ENSGALG00000043287,ENSGALG00000007409,ENSGALG00000015142
GO:0071804	cellular potassium ion transport	biological_process	2.63e-05	0.0039017	22	1067	113	14096	ENSGALG00000043287,ENSGALG00000002132,ENSGALG00000015018,ENSGALG00000004373,ENSGALG00000010204,ENSGALG00000031754,ENSGALG00000001512,ENSGALG00000016791,ENSGALG00000016448,ENSGALG00000004721,ENSGALG00000009995,ENSGALG00000004980,ENSGALG00000010598,ENSGALG00000007666,ENSGALG00000006190,ENSGALG00000043764,ENSGALG00000009265,ENSGALG00000004376,ENSGALG00000020505,ENSGALG00000014463,ENSGALG00000006922,…
GO:0045682	regulation of epidermis development	biological_process	3.41e-05	0.0049339	11	1067	35	14096	ENSGALG00000037687,ENSGALG00000028115,ENSGALG00000038495,ENSGALG00000031997,ENSGALG00000007324,ENSGALG00000000902,ENSGALG00000010133,ENSGALG00000034716,ENSGALG00000011889,ENSGALG00000038848,ENSGALG00000008702
GO:0007275	multicellular organismal development	biological_process	3.49e-05	0.0050061	254	1067	2680	14096	ENSGALG00000042851,ENSGALG00000016281,ENSGALG00000041273,ENSGALG00000000498,ENSGALG00000021647,ENSGALG00000030834,ENSGALG00000015013,ENSGALG00000005123,ENSGALG00000005043,ENSGALG00000001097,ENSGALG00000039633,ENSGALG00000034895,ENSGALG00000010133,ENSGALG00000038311,ENSGALG00000004044,ENSGALG00000000839,ENSGALG00000016744,ENSGALG00000013085,ENSGALG00000039238,ENSGALG00000000317,ENSGALG00000029140,…
GO:0030856	regulation of epithelial cell differentiation	biological_process	3.73e-05	0.005267	18	1067	83	14096	ENSGALG00000010133,ENSGALG00000001097,ENSGALG00000000902,ENSGALG00000031997,ENSGALG00000028115,ENSGALG00000038495,ENSGALG00000037687,ENSGALG00000029270,ENSGALG00000038848,ENSGALG00000034716,ENSGALG00000003647,ENSGALG00000007324,ENSGALG00000005554,ENSGALG00000018503,ENSGALG00000008702,ENSGALG00000043287,ENSGALG00000011889,ENSGALG00000005981
GO:0072006	nephron development	biological_process	4.13e-05	0.0057796	20	1067	98	14096	ENSGALG00000011358,ENSGALG00000005554,ENSGALG00000012644,ENSGALG00000026557,ENSGALG00000042045,ENSGALG00000006379,ENSGALG00000030991,ENSGALG00000013193,ENSGALG00000009724,ENSGALG00000032282,ENSGALG00000001097,ENSGALG00000007668,ENSGALG00000016680,ENSGALG00000000839,ENSGALG00000032702,ENSGALG00000010867,ENSGALG00000029301,ENSGALG00000013085,ENSGALG00000029270,ENSGALG00000039238
GO:0072009	nephron epithelium development	biological_process	4.46e-05	0.0061998	18	1067	83	14096	ENSGALG00000032282,ENSGALG00000009724,ENSGALG00000010867,ENSGALG00000013085,ENSGALG00000029301,ENSGALG00000029270,ENSGALG00000039238,ENSGALG00000000839,ENSGALG00000016680,ENSGALG00000001097,ENSGALG00000026557,ENSGALG00000012644,ENSGALG00000005554,ENSGALG00000011358,ENSGALG00000030991,ENSGALG00000013193,ENSGALG00000006379,ENSGALG00000042045
GO:0045214	sarcomere organization	biological_process	4.65e-05	0.0064036	9	1067	25	14096	ENSGALG00000009050,ENSGALG00000009089,ENSGALG00000015018,ENSGALG00000008805,ENSGALG00000001977,ENSGALG00000003521,ENSGALG00000014463,ENSGALG00000008351,ENSGALG00000019719
GO:0003009	skeletal muscle contraction	biological_process	5.03e-05	0.0066992	7	1067	14	14096	ENSGALG00000016281,ENSGALG00000014813,ENSGALG00000006835,ENSGALG00000006591,ENSGALG00000008351,ENSGALG00000006572,ENSGALG00000004376
GO:0072028	nephron morphogenesis	biological_process	5.05e-05	0.0066992	15	1067	62	14096	ENSGALG00000042045,ENSGALG00000001097,ENSGALG00000007668,ENSGALG00000000839,ENSGALG00000006379,ENSGALG00000010867,ENSGALG00000029270,ENSGALG00000029301,ENSGALG00000039238,ENSGALG00000030991,ENSGALG00000013193,ENSGALG00000011358,ENSGALG00000009724,ENSGALG00000012644,ENSGALG00000026557
GO:0035136	forelimb morphogenesis	biological_process	5.4e-05	0.0070587	11	1067	37	14096	ENSGALG00000015013,ENSGALG00000001079,ENSGALG00000038540,ENSGALG00000038848,ENSGALG00000041640,ENSGALG00000006379,ENSGALG00000040276,ENSGALG00000029140,ENSGALG00000005123,ENSGALG00000009270,ENSGALG00000016680
GO:0007519	skeletal muscle tissue development	biological_process	5.49e-05	0.0071329	22	1067	116	14096	ENSGALG00000011086,ENSGALG00000006273,ENSGALG00000016309,ENSGALG00000010936,ENSGALG00000009270,ENSGALG00000009050,ENSGALG00000015410,ENSGALG00000043727,ENSGALG00000041640,ENSGALG00000028091,ENSGALG00000016281,ENSGALG00000005292,ENSGALG00000006379,ENSGALG00000006544,ENSGALG00000016102,ENSGALG00000038813,ENSGALG00000043287,ENSGALG00000001021,ENSGALG00000042657,ENSGALG00000010881,ENSGALG00000039458,…
GO:0070252	actin-mediated cell contraction	biological_process	5.74e-05	0.0073963	11	1067	36	14096	ENSGALG00000027583,ENSGALG00000015142,ENSGALG00000007409,ENSGALG00000029694,ENSGALG00000043287,ENSGALG00000004376,ENSGALG00000021272,ENSGALG00000012790,ENSGALG00000006273,ENSGALG00000002845,ENSGALG00000008486
GO:0065008	regulation of biological quality	biological_process	5.94e-05	0.0075485	195	1067	1987	14096	ENSGALG00000014873,ENSGALG00000001234,ENSGALG00000002015,ENSGALG00000009265,ENSGALG00000012377,ENSGALG00000007666,ENSGALG00000007409,ENSGALG00000001171,ENSGALG00000014182,ENSGALG00000011009,ENSGALG00000002804,ENSGALG00000041808,ENSGALG00000016313,ENSGALG00000010598,Novel00525,ENSGALG00000008055,ENSGALG00000001416,ENSGALG00000002028,ENSGALG00000008456,ENSGALG00000009758,ENSGALG00000002125,ENSGALG0…
GO:0061337	cardiac conduction	biological_process	6.24e-05	0.0078458	11	1067	36	14096	ENSGALG00000012790,ENSGALG00000008486,ENSGALG00000002845,ENSGALG00000034895,ENSGALG00000004376,ENSGALG00000021272,ENSGALG00000043287,ENSGALG00000014873,ENSGALG00000027583,ENSGALG00000015142,ENSGALG00000007409
GO:0060538	skeletal muscle organ development	biological_process	6.26e-05	0.0078458	22	1067	117	14096	ENSGALG00000009050,ENSGALG00000015410,ENSGALG00000028091,ENSGALG00000016281,ENSGALG00000043727,ENSGALG00000041640,ENSGALG00000006273,ENSGALG00000011086,ENSGALG00000009270,ENSGALG00000016309,ENSGALG00000010936,ENSGALG00000042657,ENSGALG00000001021,ENSGALG00000043287,ENSGALG00000039458,ENSGALG00000014813,ENSGALG00000010881,ENSGALG00000005292,ENSGALG00000006379,ENSGALG00000006544,ENSGALG00000016102,…
GO:0045103	intermediate filament-based process	biological_process	7.06e-05	0.008785	9	1067	26	14096	ENSGALG00000006379,ENSGALG00000000299,ENSGALG00000030629,ENSGALG00000033118,ENSGALG00000012790,ENSGALG00000030002,ENSGALG00000003529,ENSGALG00000000909,ENSGALG00000011306
GO:0098660	inorganic ion transmembrane transport	biological_process	7.17e-05	0.0088648	54	1067	412	14096	ENSGALG00000008456,ENSGALG00000006202,ENSGALG00000006190,ENSGALG00000014695,ENSGALG00000014848,ENSGALG00000012298,ENSGALG00000003911,ENSGALG00000004376,ENSGALG00000009705,ENSGALG00000014463,ENSGALG00000020505,ENSGALG00000007623,ENSGALG00000029694,Novel01463,ENSGALG00000025804,ENSGALG00000042657,ENSGALG00000015018,Novel00960,ENSGALG00000027583,ENSGALG00000025819,ENSGALG00000016707,ENSGALG000000171…
GO:0035295	tube development	biological_process	7.96e-05	0.0097015	53	1067	409	14096	ENSGALG00000013568,ENSGALG00000042422,ENSGALG00000003553,ENSGALG00000028095,ENSGALG00000004249,ENSGALG00000013193,ENSGALG00000006379,ENSGALG00000002988,ENSGALG00000038225,ENSGALG00000008702,ENSGALG00000026557,ENSGALG00000001021,ENSGALG00000015519,ENSGALG00000012644,ENSGALG00000042657,ENSGALG00000007668,ENSGALG00000016680,ENSGALG00000031960,ENSGALG00000010825,ENSGALG00000008969,ENSGALG00000029301,…
GO:0030016	myofibril	cellular_component	1.25e-16	1.24e-12	39	1067	111	14096	ENSGALG00000037744,ENSGALG00000001926,ENSGALG00000001977,ENSGALG00000013244,ENSGALG00000038813,ENSGALG00000014847,ENSGALG00000016342,ENSGALG00000008177,ENSGALG00000015018,ENSGALG00000014813,ENSGALG00000011991,ENSGALG00000041043,ENSGALG00000013822,ENSGALG00000019719,ENSGALG00000030247,ENSGALG00000014463,ENSGALG00000006835,ENSGALG00000019157,ENSGALG00000002125,ENSGALG00000005292,ENSGALG00000035845,…
GO:0043292	contractile fiber	cellular_component	1.39e-16	1.24e-12	40	1067	117	14096	ENSGALG00000035845,ENSGALG00000005292,ENSGALG00000011306,ENSGALG00000006591,ENSGALG00000002907,ENSGALG00000014995,ENSGALG00000026452,ENSGALG00000006572,ENSGALG00000005207,ENSGALG00000004044,ENSGALG00000018946,ENSGALG00000005493,ENSGALG00000003521,ENSGALG00000011086,ENSGALG00000009089,ENSGALG00000016281,ENSGALG00000008805,ENSGALG00000031826,ENSGALG00000003529,ENSGALG00000014873,ENSGALG00000008914,…
GO:0030017	sarcomere	cellular_component	7.4e-16	4.42e-12	35	1067	95	14096	ENSGALG00000003529,ENSGALG00000009089,ENSGALG00000016281,ENSGALG00000008805,ENSGALG00000031826,ENSGALG00000018946,ENSGALG00000005493,ENSGALG00000011086,ENSGALG00000014995,ENSGALG00000026452,ENSGALG00000005207,ENSGALG00000006572,ENSGALG00000004044,ENSGALG00000011306,ENSGALG00000006591,ENSGALG00000005292,ENSGALG00000035845,ENSGALG00000019157,ENSGALG00000002125,ENSGALG00000013822,ENSGALG00000011991,…
GO:0044449	contractile fiber part	cellular_component	6.97e-15	3.12e-11	35	1067	101	14096	ENSGALG00000035845,ENSGALG00000005292,ENSGALG00000006591,ENSGALG00000011306,ENSGALG00000004044,ENSGALG00000006572,ENSGALG00000005207,ENSGALG00000026452,ENSGALG00000014995,ENSGALG00000011086,ENSGALG00000018946,ENSGALG00000005493,ENSGALG00000008805,ENSGALG00000031826,ENSGALG00000016281,ENSGALG00000009089,ENSGALG00000003529,ENSGALG00000013244,ENSGALG00000038813,ENSGALG00000014847,ENSGALG00000037744,…
GO:0042383	sarcolemma	cellular_component	2.25e-09	2.52e-06	19	1067	49	14096	ENSGALG00000016105,ENSGALG00000016281,ENSGALG00000014695,ENSGALG00000015410,ENSGALG00000003529,ENSGALG00000003886,ENSGALG00000034895,ENSGALG00000019719,ENSGALG00000014995,ENSGALG00000014988,ENSGALG00000008177,ENSGALG00000011306,ENSGALG00000008351,ENSGALG00000013968,ENSGALG00000013244,ENSGALG00000042388,ENSGALG00000017122,ENSGALG00000037744,ENSGALG00000008486
GO:0031674	I band	cellular_component	3.56e-09	3.53e-06	21	1067	62	14096	ENSGALG00000035845,ENSGALG00000005292,ENSGALG00000001926,ENSGALG00000001977,ENSGALG00000037744,ENSGALG00000011306,ENSGALG00000014813,ENSGALG00000015018,ENSGALG00000008177,ENSGALG00000014463,ENSGALG00000014995,ENSGALG00000026452,ENSGALG00000019719,ENSGALG00000004044,ENSGALG00000005207,ENSGALG00000005493,ENSGALG00000011991,ENSGALG00000009089,ENSGALG00000016281,ENSGALG00000031826,ENSGALG00000003529
GO:0030018	Z disc	cellular_component	1.43e-08	1.16e-05	19	1067	55	14096	ENSGALG00000011306,ENSGALG00000014813,ENSGALG00000008177,ENSGALG00000015018,ENSGALG00000035845,ENSGALG00000001926,ENSGALG00000001977,ENSGALG00000009089,ENSGALG00000016281,ENSGALG00000031826,ENSGALG00000003529,ENSGALG00000014463,ENSGALG00000014995,ENSGALG00000026452,ENSGALG00000019719,ENSGALG00000005207,ENSGALG00000004044,ENSGALG00000005493,ENSGALG00000011991
GO:0031226	intrinsic component of plasma membrane	cellular_component	1.25e-07	5.62e-05	93	1067	728	14096	ENSGALG00000000394,ENSGALG00000000894,ENSGALG00000009758,ENSGALG00000008741,ENSGALG00000006202,ENSGALG00000001416,ENSGALG00000005083,ENSGALG00000012298,ENSGALG00000003911,ENSGALG00000004376,ENSGALG00000020505,ENSGALG00000014984,ENSGALG00000006775,ENSGALG00000002728,ENSGALG00000001028,ENSGALG00000009405,ENSGALG00000033002,ENSGALG00000011405,ENSGALG00000004980,ENSGALG00000028871,ENSGALG00000001512,…
GO:0044459	plasma membrane part	cellular_component	1.83e-07	7.99e-05	141	1067	1245	14096	ENSGALG00000033002,ENSGALG00000011405,ENSGALG00000004980,ENSGALG00000028871,ENSGALG00000012790,ENSGALG00000031122,ENSGALG00000001028,ENSGALG00000009405,ENSGALG00000000608,ENSGALG00000003911,ENSGALG00000004146,ENSGALG00000004376,ENSGALG00000016164,ENSGALG00000014984,ENSGALG00000016615,ENSGALG00000009758,ENSGALG00000008456,ENSGALG00000008741,ENSGALG00000003126,ENSGALG00000001416,ENSGALG00000008055,…
GO:0034703	cation channel complex	cellular_component	1.98e-07	8.44e-05	25	1067	103	14096	ENSGALG00000034427,ENSGALG00000020505,ENSGALG00000004376,ENSGALG00000034895,ENSGALG00000011009,ENSGALG00000043764,ENSGALG00000007409,ENSGALG00000007666,ENSGALG00000027771,ENSGALG00000006202,ENSGALG00000008456,ENSGALG00000021272,ENSGALG00000013244,ENSGALG00000004980,ENSGALG00000009995,ENSGALG00000016448,ENSGALG00000006172,ENSGALG00000008486,ENSGALG00000001512,ENSGALG00000017125,ENSGALG00000031754,…
GO:0016528	sarcoplasm	cellular_component	2.42e-07	9.23e-05	12	1067	26	14096	ENSGALG00000017168,ENSGALG00000027583,ENSGALG00000006258,ENSGALG00000008177,ENSGALG00000015018,ENSGALG00000039712,ENSGALG00000034458,ENSGALG00000014848,ENSGALG00000008486,ENSGALG00000038813,ENSGALG00000009995,ENSGALG00000035845
GO:0005882	intermediate filament	cellular_component	2.47e-07	9.24e-05	27	1067	121	14096	Novel01533,ENSGALG00000033118,ENSGALG00000000317,Novel01536,ENSGALG00000019715,ENSGALG00000024136,ENSGALG00000030002,ENSGALG00000019719,ENSGALG00000000909,ENSGALG00000003529,ENSGALG00000014873,Novel00168,ENSGALG00000018882,Novel01535,ENSGALG00000003859,Novel01439,Novel00652,Novel02971,ENSGALG00000012790,ENSGALG00000034868,ENSGALG00000030629,ENSGALG00000019718,ENSGALG00000003690,ENSGALG00000032672…
GO:0005887	integral component of plasma membrane	cellular_component	2.71e-07	9.59e-05	89	1067	699	14096	ENSGALG00000020505,ENSGALG00000003911,ENSGALG00000012298,ENSGALG00000004376,ENSGALG00000014984,ENSGALG00000000394,ENSGALG00000000894,ENSGALG00000005083,ENSGALG00000001416,ENSGALG00000009758,ENSGALG00000006202,ENSGALG00000008741,ENSGALG00000028871,ENSGALG00000033002,ENSGALG00000011405,ENSGALG00000004980,ENSGALG00000001512,ENSGALG00000001028,ENSGALG00000002728,ENSGALG00000009405,ENSGALG00000034427,…
GO:0034702	ion channel complex	cellular_component	2.78e-07	9.6e-05	32	1067	158	14096	ENSGALG00000008456,ENSGALG00000006202,ENSGALG00000003911,ENSGALG00000004376,ENSGALG00000020505,ENSGALG00000007623,ENSGALG00000009405,ENSGALG00000016707,ENSGALG00000037744,ENSGALG00000017125,ENSGALG00000001512,ENSGALG00000013244,ENSGALG00000004980,ENSGALG00000027771,ENSGALG00000009638,ENSGALG00000007409,ENSGALG00000007666,ENSGALG00000043764,ENSGALG00000011009,ENSGALG00000016565,ENSGALG00000034895,…
GO:0016529	sarcoplasmic reticulum	cellular_component	5.58e-07	0.0001514	11	1067	23	14096	ENSGALG00000027583,ENSGALG00000015018,ENSGALG00000008177,ENSGALG00000039712,ENSGALG00000017168,ENSGALG00000038813,ENSGALG00000009995,ENSGALG00000035845,ENSGALG00000034458,ENSGALG00000014848,ENSGALG00000008486
GO:1902495	transmembrane transporter complex	cellular_component	6.15e-07	0.00016436	34	1067	179	14096	ENSGALG00000034427,ENSGALG00000027415,ENSGALG00000034895,ENSGALG00000016565,ENSGALG00000011009,ENSGALG00000007666,ENSGALG00000007409,ENSGALG00000043764,ENSGALG00000009638,ENSGALG00000027771,ENSGALG00000021272,ENSGALG00000009995,ENSGALG00000008593,ENSGALG00000006172,ENSGALG00000016448,ENSGALG00000008486,ENSGALG00000010204,ENSGALG00000031754,ENSGALG00000001698,ENSGALG00000002132,ENSGALG00000020505,…
GO:0005865	striated muscle thin filament	cellular_component	8.61e-07	0.0002143	9	1067	17	14096	ENSGALG00000002125,ENSGALG00000009089,ENSGALG00000008805,ENSGALG00000006591,ENSGALG00000006835,ENSGALG00000006572,ENSGALG00000030247,ENSGALG00000018946,ENSGALG00000011086
GO:1990351	transporter complex	cellular_component	1.03e-06	0.00024847	34	1067	183	14096	ENSGALG00000008593,ENSGALG00000009995,ENSGALG00000021272,ENSGALG00000010204,ENSGALG00000031754,ENSGALG00000006172,ENSGALG00000016448,ENSGALG00000008486,ENSGALG00000001698,ENSGALG00000002132,ENSGALG00000034895,ENSGALG00000034427,ENSGALG00000027415,ENSGALG00000016565,ENSGALG00000011009,ENSGALG00000007409,ENSGALG00000007666,ENSGALG00000043764,ENSGALG00000027771,ENSGALG00000009638,ENSGALG00000013244,…
GO:0014704	intercalated disc	cellular_component	1.41e-06	0.00030865	11	1067	26	14096	ENSGALG00000014873,ENSGALG00000008914,ENSGALG00000007409,ENSGALG00000011306,ENSGALG00000015142,ENSGALG00000002845,ENSGALG00000006508,ENSGALG00000012790,ENSGALG00000014995,ENSGALG00000034895,ENSGALG00000002198
GO:0045111	intermediate filament cytoskeleton	cellular_component	2.34e-06	0.000488	29	1067	150	14096	ENSGALG00000024136,ENSGALG00000019719,ENSGALG00000030002,ENSGALG00000033118,ENSGALG00000000317,Novel01536,ENSGALG00000019715,Novel01533,Novel00652,Novel01439,ENSGALG00000003859,ENSGALG00000003529,ENSGALG00000014873,ENSGALG00000000909,ENSGALG00000018882,Novel00168,Novel01535,ENSGALG00000003690,ENSGALG00000042360,Novel02971,ENSGALG00000030629,ENSGALG00000034868,ENSGALG00000019718,ENSGALG00000012790…
GO:0036379	myofilament	cellular_component	2.96e-06	0.00060179	9	1067	19	14096	ENSGALG00000008805,ENSGALG00000006591,ENSGALG00000002125,ENSGALG00000009089,ENSGALG00000011086,ENSGALG00000018946,ENSGALG00000006572,ENSGALG00000030247,ENSGALG00000006835
GO:0098797	plasma membrane protein complex	cellular_component	4.07e-06	0.00079366	45	1067	293	14096	ENSGALG00000014042,ENSGALG00000007623,ENSGALG00000009405,ENSGALG00000000608,ENSGALG00000037744,ENSGALG00000001512,ENSGALG00000008351,ENSGALG00000013968,ENSGALG00000013244,ENSGALG00000004980,ENSGALG00000017122,ENSGALG00000008456,ENSGALG00000028424,ENSGALG00000029301,ENSGALG00000003911,ENSGALG00000003886,ENSGALG00000004376,ENSGALG00000020505,ENSGALG00000002132,ENSGALG00000007416,ENSGALG00000010204,…
GO:0033017	sarcoplasmic reticulum membrane	cellular_component	4.72e-06	0.0009002	7	1067	11	14096	ENSGALG00000014848,ENSGALG00000017168,ENSGALG00000035845,ENSGALG00000039712,ENSGALG00000008177,ENSGALG00000027583,ENSGALG00000038813
GO:0005578	proteinaceous extracellular matrix	cellular_component	6.36e-06	0.0011177	34	1067	195	14096	ENSGALG00000042657,ENSGALG00000004620,ENSGALG00000001079,ENSGALG00000036255,ENSGALG00000034119,ENSGALG00000006379,ENSGALG00000014615,ENSGALG00000042388,ENSGALG00000036798,ENSGALG00000007508,ENSGALG00000035109,ENSGALG00000006258,ENSGALG00000009920,ENSGALG00000003582,ENSGALG00000016843,ENSGALG00000010583,ENSGALG00000006864,ENSGALG00000011358,ENSGALG00000001343,ENSGALG00000008980,ENSGALG00000004526,…
GO:0071944	cell periphery	cellular_component	8.61e-06	0.0014791	230	1067	2347	14096	ENSGALG00000042354,ENSGALG00000003217,ENSGALG00000014984,ENSGALG00000016164,ENSGALG00000014463,ENSGALG00000004146,ENSGALG00000003911,ENSGALG00000019719,ENSGALG00000004376,ENSGALG00000003126,ENSGALG00000002028,ENSGALG00000001416,ENSGALG00000009758,ENSGALG00000008456,ENSGALG00000008741,ENSGALG00000016615,ENSGALG00000002125,ENSGALG00000031122,ENSGALG00000000299,ENSGALG00000012790,ENSGALG00000006602,…
GO:0031672	A band	cellular_component	1.55e-05	0.0024348	8	1067	17	14096	ENSGALG00000014847,ENSGALG00000038813,ENSGALG00000005292,ENSGALG00000018946,ENSGALG00000019157,ENSGALG00000009089,ENSGALG00000008805,ENSGALG00000016342
GO:0005886	plasma membrane	cellular_component	1.7e-05	0.0026327	220	1067	2251	14096	ENSGALG00000015142,ENSGALG00000002728,ENSGALG00000021443,ENSGALG00000007623,ENSGALG00000011673,ENSGALG00000042657,ENSGALG00000015519,ENSGALG00000004260,ENSGALG00000013968,ENSGALG00000038813,ENSGALG00000030871,ENSGALG00000041826,ENSGALG00000029150,ENSGALG00000003553,ENSGALG00000001512,ENSGALG00000043139,ENSGALG00000000394,ENSGALG00000000894,ENSGALG00000006190,ENSGALG00000016157,ENSGALG00000006202,…
GO:0031224	intrinsic component of membrane	cellular_component	2.48e-05	0.0036973	302	1067	3264	14096	ENSGALG00000014182,ENSGALG00000001171,ENSGALG00000005599,ENSGALG00000001621,ENSGALG00000027771,ENSGALG00000010935,ENSGALG00000014687,ENSGALG00000012577,Novel02060,ENSGALG00000001449,ENSGALG00000009265,ENSGALG00000007409,ENSGALG00000004613,ENSGALG00000005814,ENSGALG00000008055,ENSGALG00000013212,ENSGALG00000014346,ENSGALG00000032903,ENSGALG00000009495,ENSGALG00000004376,ENSGALG00000003911,ENSGALG0…
GO:0031430	M band	cellular_component	3.72e-05	0.005267	6	1067	10	14096	ENSGALG00000038813,ENSGALG00000008805,ENSGALG00000019157,ENSGALG00000014847,ENSGALG00000009089,ENSGALG00000016342
GO:0016021	integral component of membrane	cellular_component	4.68e-05	0.0064036	296	1067	3215	14096	ENSGALG00000008552,ENSGALG00000034895,ENSGALG00000010133,Novel00127,ENSGALG00000003285,ENSGALG00000016744,ENSGALG00000007186,ENSGALG00000007412,ENSGALG00000009435,Novel00044,ENSGALG00000009219,ENSGALG00000014477,ENSGALG00000006421,ENSGALG00000015055,ENSGALG00000010931,ENSGALG00000009995,ENSGALG00000013616,ENSGALG00000002864,ENSGALG00000041101,ENSGALG00000000690,ENSGALG00000012886,Novel00085,ENSGA…
GO:0016010	dystrophin-associated glycoprotein complex	cellular_component	5.04e-05	0.0066992	7	1067	14	14096	ENSGALG00000016281,ENSGALG00000017122,ENSGALG00000014995,ENSGALG00000013968,ENSGALG00000003886,ENSGALG00000008351,ENSGALG00000014042
GO:0022836	gated channel activity	molecular_function	2.49e-08	1.94e-05	47	1067	265	14096	ENSGALG00000037744,ENSGALG00000001512,ENSGALG00000020143,ENSGALG00000004980,ENSGALG00000009405,ENSGALG00000007623,ENSGALG00000006503,ENSGALG00000025804,ENSGALG00000012594,ENSGALG00000016707,ENSGALG00000004376,ENSGALG00000003911,ENSGALG00000040479,ENSGALG00000009705,ENSGALG00000020505,ENSGALG00000006202,ENSGALG00000007269,ENSGALG00000008456,ENSGALG00000014695,ENSGALG00000031754,ENSGALG00000010204,…
GO:0015267	channel activity	molecular_function	7.28e-08	4.5e-05	57	1067	363	14096	ENSGALG00000021443,ENSGALG00000009405,ENSGALG00000006503,ENSGALG00000007623,ENSGALG00000025804,ENSGALG00000012594,ENSGALG00000016707,ENSGALG00000000003,ENSGALG00000015128,ENSGALG00000037744,ENSGALG00000001512,ENSGALG00000020143,ENSGALG00000004980,ENSGALG00000013244,ENSGALG00000006202,ENSGALG00000008456,ENSGALG00000007269,ENSGALG00000014695,ENSGALG00000004376,ENSGALG00000003911,ENSGALG00000040479,…
GO:0022803	passive transmembrane transporter activity	molecular_function	7.28e-08	4.5e-05	57	1067	363	14096	ENSGALG00000027771,ENSGALG00000014873,ENSGALG00000009638,Novel02067,Novel01117,ENSGALG00000004613,ENSGALG00000007666,ENSGALG00000007409,ENSGALG00000043764,ENSGALG00000009265,ENSGALG00000016565,ENSGALG00000011009,ENSGALG00000015126,ENSGALG00000016744,ENSGALG00000034895,ENSGALG00000034427,ENSGALG00000025971,ENSGALG00000006922,ENSGALG00000027415,Novel02798,ENSGALG00000041808,ENSGALG00000000367,ENSGA…
GO:0005244	voltage-gated ion channel activity	molecular_function	9.78e-08	5.16e-05	31	1067	144	14096	ENSGALG00000004980,ENSGALG00000004721,ENSGALG00000021272,ENSGALG00000031754,ENSGALG00000010204,ENSGALG00000037744,ENSGALG00000008486,ENSGALG00000016448,ENSGALG00000001512,ENSGALG00000012594,ENSGALG00000016707,ENSGALG00000004373,ENSGALG00000006503,ENSGALG00000007623,ENSGALG00000025804,ENSGALG00000004376,ENSGALG00000034895,ENSGALG00000003911,ENSGALG00000006922,ENSGALG00000025971,ENSGALG00000034427,…
GO:0022832	voltage-gated channel activity	molecular_function	9.78e-08	5.16e-05	31	1067	144	14096	ENSGALG00000031754,ENSGALG00000010204,ENSGALG00000037744,ENSGALG00000008486,ENSGALG00000016448,ENSGALG00000001512,ENSGALG00000004980,ENSGALG00000004721,ENSGALG00000021272,ENSGALG00000006503,ENSGALG00000007623,ENSGALG00000025804,ENSGALG00000012594,ENSGALG00000004373,ENSGALG00000016707,ENSGALG00000011009,ENSGALG00000004376,ENSGALG00000003911,ENSGALG00000034895,ENSGALG00000006922,ENSGALG00000025971,…
GO:0005216	ion channel activity	molecular_function	2.28e-07	9.18e-05	53	1067	338	14096	ENSGALG00000009638,ENSGALG00000027771,ENSGALG00000007409,ENSGALG00000004613,ENSGALG00000007666,ENSGALG00000043764,ENSGALG00000009265,Novel02067,Novel01117,ENSGALG00000016744,ENSGALG00000016565,ENSGALG00000011009,ENSGALG00000015126,ENSGALG00000034427,ENSGALG00000027415,ENSGALG00000025971,ENSGALG00000006922,ENSGALG00000034895,ENSGALG00000000367,Novel02798,ENSGALG00000041808,ENSGALG00000004373,ENSGA…
GO:0022838	substrate-specific channel activity	molecular_function	2.85e-07	9.64e-05	54	1067	350	14096	ENSGALG00000006503,ENSGALG00000007623,ENSGALG00000009405,ENSGALG00000025804,ENSGALG00000012594,ENSGALG00000016707,ENSGALG00000037744,ENSGALG00000015128,ENSGALG00000001512,ENSGALG00000020143,ENSGALG00000013244,ENSGALG00000004980,ENSGALG00000008456,ENSGALG00000007269,ENSGALG00000006202,ENSGALG00000014695,ENSGALG00000003911,ENSGALG00000040479,ENSGALG00000004376,ENSGALG00000009705,ENSGALG00000020505,…
GO:0005509	calcium ion binding	molecular_function	6.26e-07	0.00016496	62	1067	428	14096	ENSGALG00000009415,ENSGALG00000010960,ENSGALG00000009458,ENSGALG00000019060,ENSGALG00000012155,ENSGALG00000007038,ENSGALG00000028924,ENSGALG00000026687,ENSGALG00000026903,ENSGALG00000008980,ENSGALG00000015140,ENSGALG00000001122,ENSGALG00000012576,ENSGALG00000005956,ENSGALG00000009884,ENSGALG00000006982,ENSGALG00000002907,ENSGALG00000002132,ENSGALG00000005448,ENSGALG00000012869,ENSGALG00000010747,…
GO:0005261	cation channel activity	molecular_function	1.36e-06	0.0003083	42	1067	251	14096	ENSGALG00000006202,ENSGALG00000008456,ENSGALG00000004376,ENSGALG00000040479,ENSGALG00000003911,ENSGALG00000009705,ENSGALG00000020505,ENSGALG00000007623,ENSGALG00000037744,ENSGALG00000001512,ENSGALG00000004980,ENSGALG00000013244,ENSGALG00000027771,ENSGALG00000009638,Novel01117,Novel02067,ENSGALG00000043764,ENSGALG00000009265,ENSGALG00000007666,ENSGALG00000004613,ENSGALG00000007409,ENSGALG000000151…
GO:0044325	ion channel binding	molecular_function	1.4e-06	0.00030865	17	1067	59	14096	ENSGALG00000004146,ENSGALG00000014463,ENSGALG00000020505,ENSGALG00000014848,ENSGALG00000006508,ENSGALG00000007666,ENSGALG00000006190,ENSGALG00000007409,ENSGALG00000009995,ENSGALG00000008351,ENSGALG00000013244,ENSGALG00000001512,ENSGALG00000006172,ENSGALG00000014813,ENSGALG00000029694,ENSGALG00000043287,ENSGALG00000006503
GO:0001228	transcriptional activator activity, RNA polymerase II transcription regulatory region sequence-specific binding	molecular_function	1.8e-06	0.00038298	38	1067	227	14096	ENSGALG00000001518,ENSGALG00000026264,ENSGALG00000007324,ENSGALG00000032748,ENSGALG00000009129,ENSGALG00000039497,ENSGALG00000030879,ENSGALG00000041470,ENSGALG00000001006,ENSGALG00000040276,ENSGALG00000007690,ENSGALG00000038495,ENSGALG00000005839,ENSGALG00000031862,ENSGALG00000039633,ENSGALG00000036082,ENSGALG00000015013,ENSGALG00000004249,ENSGALG00000000616,ENSGALG00000013568,ENSGALG00000035867,…
GO:0015075	ion transmembrane transporter activity	molecular_function	2.82e-06	0.00058132	87	1067	699	14096	ENSGALG00000003582,ENSGALG00000012985,ENSGALG00000014695,ENSGALG00000037744,Novel01712,ENSGALG00000020143,ENSGALG00000013244,ENSGALG00000012847,ENSGALG00000006503,ENSGALG00000025804,ENSGALG00000012594,ENSGALG00000025819,ENSGALG00000026768,ENSGALG00000015126,ENSGALG00000019276,ENSGALG00000027415,ENSGALG00000025971,ENSGALG00000014372,ENSGALG00000009638,Novel02067,Novel01423,ENSGALG00000031754,ENSGA…
GO:0022843	voltage-gated cation channel activity	molecular_function	5.2e-06	0.00095739	25	1067	123	14096	ENSGALG00000011009,ENSGALG00000020505,ENSGALG00000034427,ENSGALG00000006922,ENSGALG00000025971,ENSGALG00000034895,ENSGALG00000003911,ENSGALG00000004376,ENSGALG00000008456,ENSGALG00000027771,ENSGALG00000007666,ENSGALG00000007409,ENSGALG00000009265,ENSGALG00000043764,ENSGALG00000001512,ENSGALG00000008486,ENSGALG00000016448,ENSGALG00000037744,ENSGALG00000010204,ENSGALG00000031754,ENSGALG00000021272,…
GO:0022891	substrate-specific transmembrane transporter activity	molecular_function	5.54e-06	0.0010036	91	1067	753	14096	ENSGALG00000025804,ENSGALG00000012847,ENSGALG00000006503,ENSGALG00000025819,ENSGALG00000012594,ENSGALG00000015128,ENSGALG00000037744,Novel01712,ENSGALG00000013244,ENSGALG00000020143,ENSGALG00000014695,Novel01037,ENSGALG00000003582,ENSGALG00000012985,ENSGALG00000000367,Novel02798,ENSGALG00000004373,ENSGALG00000001698,ENSGALG00000003778,ENSGALG00000016448,ENSGALG00000041932,ENSGALG00000016791,ENSGA…
GO:0022892	substrate-specific transporter activity	molecular_function	6.36e-06	0.0011177	102	1067	873	14096	ENSGALG00000013244,ENSGALG00000020143,ENSGALG00000037744,Novel01712,ENSGALG00000015128,ENSGALG00000001662,ENSGALG00000012594,ENSGALG00000025819,ENSGALG00000006503,ENSGALG00000012847,ENSGALG00000035619,ENSGALG00000025804,ENSGALG00000012985,ENSGALG00000003582,Novel01037,ENSGALG00000014695,ENSGALG00000004721,ENSGALG00000000745,ENSGALG00000007179,ENSGALG00000021272,ENSGALG00000010204,ENSGALG000000036…
GO:0022857	transmembrane transporter activity	molecular_function	8.67e-06	0.0014791	97	1067	823	14096	ENSGALG00000039687,ENSGALG00000041808,Novel00516,Novel00735,ENSGALG00000010598,ENSGALG00000010992,ENSGALG00000006172,ENSGALG00000002621,Novel01024,ENSGALG00000043764,Novel00044,ENSGALG00000009265,ENSGALG00000004613,ENSGALG00000007409,ENSGALG00000007666,Novel01117,ENSGALG00000015055,ENSGALG00000014873,ENSGALG00000027771,ENSGALG00000006421,ENSGALG00000006922,ENSGALG00000004778,ENSGALG00000034427,EN…
GO:0005215	transporter activity	molecular_function	1.54e-05	0.0024348	114	1067	1018	14096	ENSGALG00000008456,ENSGALG00000007269,ENSGALG00000009758,ENSGALG00000006202,ENSGALG00000041344,ENSGALG00000005083,ENSGALG00000000394,ENSGALG00000007114,ENSGALG00000006807,ENSGALG00000003911,ENSGALG00000040479,ENSGALG00000012298,ENSGALG00000004376,ENSGALG00000020505,ENSGALG00000009705,ENSGALG00000016164,ENSGALG00000007623,ENSGALG00000009405,ENSGALG00000021443,Novel01463,Novel00960,ENSGALG000000027…
GO:0005198	structural molecule activity	molecular_function	2.88e-05	0.0042377	66	1067	519	14096	Novel01536,ENSGALG00000019715,ENSGALG00000000317,ENSGALG00000013056,ENSGALG00000004946,ENSGALG00000004044,ENSGALG00000008552,ENSGALG00000001621,ENSGALG00000024136,Novel01535,Novel02730,ENSGALG00000000059,ENSGALG00000003859,ENSGALG00000008141,Novel01155,ENSGALG00000016281,ENSGALG00000034868,Novel02550,ENSGALG00000002621,Novel01815,Novel00990,ENSGALG00000003690,Novel00735,ENSGALG00000043287,Novel03…
GO:0001077	transcriptional activator activity, RNA polymerase II core promoter proximal region sequence-specific binding	molecular_function	2.92e-05	0.0042477	27	1067	156	14096	ENSGALG00000038495,ENSGALG00000007690,ENSGALG00000029270,ENSGALG00000040276,ENSGALG00000016680,ENSGALG00000031862,ENSGALG00000031960,ENSGALG00000036082,ENSGALG00000043727,ENSGALG00000006673,ENSGALG00000007324,ENSGALG00000032748,ENSGALG00000026264,ENSGALG00000001518,ENSGALG00000012775,ENSGALG00000007817,ENSGALG00000030879,ENSGALG00000039497,ENSGALG00000013568,ENSGALG00000000616,ENSGALG00000009129,…
GO:0046873	metal ion transmembrane transporter activity	molecular_function	4.91e-05	0.0066724	47	1067	336	14096	ENSGALG00000031754,Novel01423,ENSGALG00000003647,ENSGALG00000010204,ENSGALG00000016448,ENSGALG00000006172,ENSGALG00000008486,ENSGALG00000016791,ENSGALG00000004721,ENSGALG00000021272,ENSGALG00000010598,ENSGALG00000010992,Novel00516,Novel02798,ENSGALG00000000367,ENSGALG00000039687,ENSGALG00000004373,ENSGALG00000011009,ENSGALG00000031105,ENSGALG00000034895,ENSGALG00000025971,ENSGALG00000006922,ENSGA…
GO:0005523	tropomyosin binding	molecular_function	5.22e-05	0.0068797	6	1067	11	14096	ENSGALG00000002125,ENSGALG00000030247,ENSGALG00000041826,ENSGALG00000008805,ENSGALG00000006572,ENSGALG00000018946
GO:0008324	cation transmembrane transporter activity	molecular_function	5.93e-05	0.0075485	66	1067	529	14096	ENSGALG00000012985,ENSGALG00000003582,ENSGALG00000013244,Novel01712,ENSGALG00000037744,ENSGALG00000025819,ENSGALG00000027415,ENSGALG00000025971,ENSGALG00000015126,Novel02067,ENSGALG00000009638,ENSGALG00000014372,ENSGALG00000007179,ENSGALG00000021272,ENSGALG00000004721,ENSGALG00000016448,ENSGALG00000016791,ENSGALG00000008486,ENSGALG00000003647,ENSGALG00000010204,ENSGALG00000031754,Novel01423,ENSGA…
GO:0008307	structural constituent of muscle	molecular_function	7.41e-05	0.0091002	6	1067	11	14096	ENSGALG00000019719,ENSGALG00000004044,ENSGALG00000013414,ENSGALG00000035845,ENSGALG00000009089,ENSGALG00000009050

## Sheet: E12 vs 1d
GO_accession	Description	Term_type	Over_represented_pValue	Corrected_pValue	DEG_item	DEG_list	Bg_item	Bg_list	Gene_names
GO:0022904	respiratory electron transport chain	biological_process	1.94e-16	2.17e-13	33	2696	42	14096	ENSGALG00000008066,ENSGALG00000005789,ENSGALG00000008821,ENSGALG00000032544,Novel00714,ENSGALG00000005749,ENSGALG00000005704,ENSGALG00000009545,ENSGALG00000014121,ENSGALG00000002490,ENSGALG00000035334,ENSGALG00000036229,ENSGALG00000017380,ENSGALG00000010614,ENSGALG00000032079,ENSGALG00000029500,ENSGALG00000011661,ENSGALG00000042851,ENSGALG00000010379,ENSGALG00000043768,ENSGALG00000008606,ENSGALG0…
GO:0015980	energy derivation by oxidation of organic compounds	biological_process	2.3e-15	2.42e-12	67	2696	137	14096	ENSGALG00000013167,ENSGALG00000002705,ENSGALG00000029172,ENSGALG00000013165,ENSGALG00000043768,ENSGALG00000010286,ENSGALG00000010476,ENSGALG00000011950,Novel02589,ENSGALG00000004302,ENSGALG00000004801,ENSGALG00000004004,ENSGALG00000034397,ENSGALG00000033271,ENSGALG00000011016,ENSGALG00000000629,ENSGALG00000036625,ENSGALG00000011020,ENSGALG00000001949,ENSGALG00000032687,ENSGALG00000016600,ENSGALG0…
GO:0022900	electron transport chain	biological_process	2.43e-15	2.42e-12	36	2696	51	14096	ENSGALG00000029172,ENSGALG00000013167,ENSGALG00000008606,ENSGALG00000043768,Novel02589,ENSGALG00000001184,ENSGALG00000004302,ENSGALG00000007931,ENSGALG00000032456,ENSGALG00000013191,ENSGALG00000037593,ENSGALG00000036625,ENSGALG00000000629,ENSGALG00000011020,ENSGALG00000032544,Novel00714,ENSGALG00000008821,ENSGALG00000008066,ENSGALG00000005789,ENSGALG00000028026,ENSGALG00000009442,ENSGALG000000057…
GO:0045333	cellular respiration	biological_process	7.93e-15	7.48e-12	50	2696	89	14096	ENSGALG00000005749,ENSGALG00000005704,ENSGALG00000008821,ENSGALG00000019967,Novel00714,ENSGALG00000032544,ENSGALG00000028026,ENSGALG00000005789,ENSGALG00000008066,ENSGALG00000015961,ENSGALG00000029576,ENSGALG00000011661,ENSGALG00000042851,ENSGALG00000010379,ENSGALG00000041401,ENSGALG00000035334,ENSGALG00000002490,ENSGALG00000032079,ENSGALG00000029500,ENSGALG00000010614,ENSGALG00000017380,ENSGALG0…
GO:0006091	generation of precursor metabolites and energy	biological_process	1.49e-14	1.33e-11	83	2696	194	14096	ENSGALG00000008821,ENSGALG00000019967,Novel00714,ENSGALG00000005407,ENSGALG00000028026,ENSGALG00000006670,ENSGALG00000012613,ENSGALG00000005704,ENSGALG00000035334,ENSGALG00000041470,ENSGALG00000029500,ENSGALG00000017380,ENSGALG00000036229,ENSGALG00000008239,ENSGALG00000008858,ENSGALG00000009545,ENSGALG00000026287,Novel01006,ENSGALG00000029576,ENSGALG00000042851,ENSGALG00000030034,ENSGALG000000024…
GO:0042773	ATP synthesis coupled electron transport	biological_process	3.83e-13	2.86e-10	24	2696	29	14096	ENSGALG00000010379,ENSGALG00000011020,ENSGALG00000036625,ENSGALG00000000629,ENSGALG00000037593,ENSGALG00000013191,ENSGALG00000014121,ENSGALG00000002490,ENSGALG00000032079,ENSGALG00000029500,ENSGALG00000017380,ENSGALG00000036229,ENSGALG00000004302,ENSGALG00000007931,ENSGALG00000001184,ENSGALG00000005749,ENSGALG00000005704,Novel02589,ENSGALG00000043768,ENSGALG00000008606,ENSGALG00000005789,ENSGALG0…
GO:0006119	oxidative phosphorylation	biological_process	6.64e-13	4.58e-10	28	2696	38	14096	Novel02589,ENSGALG00000005704,ENSGALG00000005749,ENSGALG00000034960,ENSGALG00000007931,ENSGALG00000004302,ENSGALG00000001184,ENSGALG00000029172,ENSGALG00000004809,Novel00714,ENSGALG00000008066,ENSGALG00000008606,ENSGALG00000005789,ENSGALG00000002388,ENSGALG00000043768,ENSGALG00000037593,ENSGALG00000036625,ENSGALG00000000629,ENSGALG00000011020,ENSGALG00000010379,ENSGALG00000032142,ENSGALG000000362…
GO:0042775	mitochondrial ATP synthesis coupled electron transport	biological_process	1.61e-12	9.95e-10	22	2696	26	14096	ENSGALG00000005749,ENSGALG00000007931,ENSGALG00000004302,ENSGALG00000001184,ENSGALG00000005704,Novel02589,ENSGALG00000043768,ENSGALG00000008066,ENSGALG00000005789,Novel00714,ENSGALG00000029172,ENSGALG00000000629,ENSGALG00000036625,ENSGALG00000010379,ENSGALG00000011020,ENSGALG00000037593,ENSGALG00000013191,ENSGALG00000014121,ENSGALG00000002490,ENSGALG00000036229,ENSGALG00000032079,ENSGALG000000173…
GO:0055114	oxidation-reduction process	biological_process	3.47e-12	2.01e-09	197	2696	661	14096	ENSGALG00000004759,ENSGALG00000009700,Novel00053,ENSGALG00000009948,ENSGALG00000008834,ENSGALG00000008606,Novel02767,ENSGALG00000008063,ENSGALG00000007300,ENSGALG00000004003,ENSGALG00000028537,ENSGALG00000010798,ENSGALG00000015544,ENSGALG00000013297,ENSGALG00000005363,ENSGALG00000014155,ENSGALG00000001184,ENSGALG00000014869,ENSGALG00000004521,ENSGALG00000008040,ENSGALG00000008953,Novel01613,ENSGA…
GO:0009126	purine nucleoside monophosphate metabolic process	biological_process	5.88e-12	3.1e-09	66	2696	153	14096	ENSGALG00000011020,ENSGALG00000000629,ENSGALG00000036625,ENSGALG00000029150,ENSGALG00000033271,ENSGALG00000007936,ENSGALG00000004956,ENSGALG00000001452,ENSGALG00000004302,ENSGALG00000038672,ENSGALG00000032465,Novel02589,ENSGALG00000005961,ENSGALG00000043768,ENSGALG00000007606,ENSGALG00000004809,ENSGALG00000029172,ENSGALG00000038801,ENSGALG00000014447,ENSGALG00000014442,ENSGALG00000041091,ENSGALG0…
GO:0009123	nucleoside monophosphate metabolic process	biological_process	1.09e-11	5.6e-09	69	2696	165	14096	ENSGALG00000008606,ENSGALG00000002388,ENSGALG00000007926,ENSGALG00000015544,ENSGALG00000001184,Novel01063,ENSGALG00000007931,ENSGALG00000026776,ENSGALG00000015372,ENSGALG00000003816,ENSGALG00000013191,ENSGALG00000032142,ENSGALG00000001330,ENSGALG00000002082,ENSGALG00000037593,ENSGALG00000011035,Novel00714,ENSGALG00000006899,ENSGALG00000005704,ENSGALG00000015373,ENSGALG00000012613,ENSGALG000000067…
GO:0046034	ATP metabolic process	biological_process	1.97e-11	9.53e-09	59	2696	133	14096	ENSGALG00000011020,ENSGALG00000000629,ENSGALG00000036625,ENSGALG00000029150,ENSGALG00000001330,ENSGALG00000032142,ENSGALG00000037593,ENSGALG00000033271,ENSGALG00000007936,ENSGALG00000026776,ENSGALG00000013191,ENSGALG00000004956,ENSGALG00000015372,ENSGALG00000001452,ENSGALG00000015544,ENSGALG00000007926,ENSGALG00000004302,Novel01063,ENSGALG00000007931,ENSGALG00000038672,ENSGALG00000001184,ENSGALG0…
GO:0009167	purine ribonucleoside monophosphate metabolic process	biological_process	3.02e-11	1.42e-08	64	2696	151	14096	Novel01063,ENSGALG00000007931,ENSGALG00000001184,ENSGALG00000015544,ENSGALG00000007926,ENSGALG00000002388,ENSGALG00000008606,ENSGALG00000037593,ENSGALG00000002082,ENSGALG00000032142,ENSGALG00000001330,ENSGALG00000013191,ENSGALG00000015372,ENSGALG00000026776,ENSGALG00000012613,ENSGALG00000015373,ENSGALG00000005704,ENSGALG00000006899,Novel00714,ENSGALG00000011035,ENSGALG00000009286,ENSGALG000000060…
GO:0044281	small molecule metabolic process	biological_process	3.59e-11	1.65e-08	295	2696	1107	14096	ENSGALG00000014442,ENSGALG00000006431,ENSGALG00000041401,ENSGALG00000034735,ENSGALG00000005550,ENSGALG00000030251,Novel01646,ENSGALG00000014673,ENSGALG00000000913,ENSGALG00000001557,Novel01930,ENSGALG00000004662,ENSGALG00000001992,ENSGALG00000003193,ENSGALG00000029102,ENSGALG00000015433,ENSGALG00000015961,ENSGALG00000026507,ENSGALG00000008066,Novel00594,ENSGALG00000033271,ENSGALG00000001949,ENSGA…
GO:0009161	ribonucleoside monophosphate metabolic process	biological_process	4.4e-11	1.97e-08	66	2696	159	14096	ENSGALG00000015544,ENSGALG00000007926,Novel01063,ENSGALG00000001184,ENSGALG00000007931,ENSGALG00000008606,ENSGALG00000002388,ENSGALG00000032142,ENSGALG00000001330,ENSGALG00000002082,ENSGALG00000037593,ENSGALG00000026776,ENSGALG00000015372,ENSGALG00000013191,ENSGALG00000006899,ENSGALG00000005704,ENSGALG00000015373,ENSGALG00000012613,ENSGALG00000011035,Novel00714,ENSGALG00000010379,ENSGALG000000428…
GO:0009888	tissue development	biological_process	8.7e-11	3.71e-08	302	2696	1149	14096	ENSGALG00000028069,ENSGALG00000016281,ENSGALG00000038225,ENSGALG00000004161,ENSGALG00000038848,ENSGALG00000008716,ENSGALG00000003314,ENSGALG00000029811,ENSGALG00000037576,ENSGALG00000006099,ENSGALG00000010927,ENSGALG00000010974,ENSGALG00000030030,ENSGALG00000016022,ENSGALG00000028115,ENSGALG00000003285,ENSGALG00000021647,ENSGALG00000030932,ENSGALG00000008609,ENSGALG00000010770,ENSGALG00000031862,…
GO:0009205	purine ribonucleoside triphosphate metabolic process	biological_process	1.73e-10	6.75e-08	61	2696	145	14096	ENSGALG00000001452,ENSGALG00000026776,ENSGALG00000004956,ENSGALG00000013191,ENSGALG00000015372,ENSGALG00000037593,ENSGALG00000033271,Novel00594,ENSGALG00000007936,ENSGALG00000011020,ENSGALG00000036625,ENSGALG00000000629,ENSGALG00000029150,ENSGALG00000001330,ENSGALG00000032142,ENSGALG00000004809,ENSGALG00000029172,ENSGALG00000038801,ENSGALG00000014447,ENSGALG00000008606,ENSGALG00000007606,ENSGALG0…
GO:0009199	ribonucleoside triphosphate metabolic process	biological_process	2.86e-10	1.09e-07	62	2696	150	14096	ENSGALG00000001452,ENSGALG00000026776,ENSGALG00000015372,ENSGALG00000004956,ENSGALG00000013191,ENSGALG00000033271,ENSGALG00000037593,Novel00594,ENSGALG00000007936,ENSGALG00000000629,ENSGALG00000036625,ENSGALG00000011020,ENSGALG00000032142,ENSGALG00000001330,ENSGALG00000029150,ENSGALG00000038801,ENSGALG00000004809,ENSGALG00000029172,ENSGALG00000014447,ENSGALG00000008606,ENSGALG00000002388,ENSGALG0…
GO:0009144	purine nucleoside triphosphate metabolic process	biological_process	2.94e-10	1.1e-07	62	2696	150	14096	ENSGALG00000029150,ENSGALG00000001330,ENSGALG00000032142,ENSGALG00000011020,ENSGALG00000036625,ENSGALG00000000629,Novel00594,ENSGALG00000007936,ENSGALG00000037593,ENSGALG00000033271,ENSGALG00000004956,ENSGALG00000013191,ENSGALG00000015372,ENSGALG00000026776,ENSGALG00000001452,Novel01063,ENSGALG00000004302,ENSGALG00000007931,ENSGALG00000001184,ENSGALG00000038672,ENSGALG00000032465,ENSGALG000000155…
GO:0009141	nucleoside triphosphate metabolic process	biological_process	4.92e-10	1.8e-07	67	2696	169	14096	ENSGALG00000032079,ENSGALG00000006040,ENSGALG00000002490,ENSGALG00000014121,ENSGALG00000005002,ENSGALG00000041091,ENSGALG00000004245,ENSGALG00000037880,ENSGALG00000014442,ENSGALG00000030493,ENSGALG00000001992,ENSGALG00000005789,ENSGALG00000015961,ENSGALG00000008066,Novel01930,ENSGALG00000014526,ENSGALG00000005749,ENSGALG00000034960,ENSGALG00000034397,ENSGALG00000001452,Novel00809,ENSGALG000000049…
GO:0006811	ion transport	biological_process	6.49e-10	2.33e-07	267	2696	1011	14096	ENSGALG00000032465,ENSGALG00000025819,ENSGALG00000007205,ENSGALG00000033002,Novel00752,ENSGALG00000013244,ENSGALG00000038801,ENSGALG00000004809,ENSGALG00000004355,ENSGALG00000008593,ENSGALG00000005400,ENSGALG00000012985,ENSGALG00000003647,ENSGALG00000029694,ENSGALG00000006922,ENSGALG00000011481,ENSGALG00000012142,ENSGALG00000035144,ENSGALG00000039712,ENSGALG00000008231,ENSGALG00000002277,ENSGALG0…
GO:0044699	single-organism process	biological_process	1.12e-09	3.93e-07	1833	2696	8932	14096	ENSGALG00000006598,Novel00968,ENSGALG00000016959,ENSGALG00000001946,ENSGALG00000001181,ENSGALG00000002705,ENSGALG00000029172,ENSGALG00000016332,Novel00276,ENSGALG00000013626,ENSGALG00000027871,ENSGALG00000038672,ENSGALG00000003837,ENSGALG00000002283,ENSGALG00000013627,ENSGALG00000036500,ENSGALG00000030991,ENSGALG00000001475,ENSGALG00000026862,ENSGALG00000005451,ENSGALG00000028895,ENSGALG000000352…
GO:0034220	ion transmembrane transport	biological_process	1.26e-09	4.33e-07	170	2696	589	14096	ENSGALG00000005995,ENSGALG00000014994,ENSGALG00000016707,ENSGALG00000015128,ENSGALG00000041808,ENSGALG00000008222,ENSGALG00000005215,ENSGALG00000009995,ENSGALG00000011052,ENSGALG00000004240,ENSGALG00000015233,ENSGALG00000006635,ENSGALG00000020505,ENSGALG00000014848,ENSGALG00000015751,ENSGALG00000027483,ENSGALG00000035334,ENSGALG00000011483,ENSGALG00000010044,Novel00960,ENSGALG00000004660,ENSGALG0…
GO:0055085	transmembrane transport	biological_process	2.37e-09	8.02e-07	226	2696	839	14096	ENSGALG00000034025,Novel00735,ENSGALG00000006503,Novel00044,ENSGALG00000004096,ENSGALG00000037138,ENSGALG00000012155,Novel01013,ENSGALG00000015126,ENSGALG00000007495,Novel00593,Novel02798,ENSGALG00000030834,ENSGALG00000010098,ENSGALG00000040938,ENSGALG00000015372,ENSGALG00000010943,ENSGALG00000034427,ENSGALG00000037203,ENSGALG00000035559,ENSGALG00000001330,ENSGALG00000009919,ENSGALG00000002621,EN…
GO:0098655	cation transmembrane transport	biological_process	4.72e-09	1.57e-06	125	2696	408	14096	ENSGALG00000017085,ENSGALG00000034025,ENSGALG00000011897,ENSGALG00000005801,ENSGALG00000041791,ENSGALG00000037138,ENSGALG00000004096,ENSGALG00000015126,ENSGALG00000007926,Novel01063,ENSGALG00000027415,ENSGALG00000004980,ENSGALG00000004613,ENSGALG00000012111,ENSGALG00000015372,ENSGALG00000010943,ENSGALG00000007899,ENSGALG00000036360,ENSGALG00000034427,ENSGALG00000011250,ENSGALG00000008351,ENSGALG0…
GO:0044763	single-organism cellular process	biological_process	1.84e-08	5.4e-06	1613	2696	7821	14096	ENSGALG00000030140,ENSGALG00000027454,ENSGALG00000001330,ENSGALG00000035559,ENSGALG00000003594,ENSGALG00000000299,Novel00643,ENSGALG00000001207,ENSGALG00000039964,ENSGALG00000025810,ENSGALG00000015372,ENSGALG00000031117,Novel01265,ENSGALG00000020876,ENSGALG00000027091,ENSGALG00000004221,ENSGALG00000028091,ENSGALG00000001028,ENSGALG00000030643,ENSGALG00000027232,ENSGALG00000006137,ENSGALG000000074…
GO:0048731	system development	biological_process	1.92e-08	5.54e-06	567	2696	2474	14096	ENSGALG00000006802,ENSGALG00000000949,ENSGALG00000008469,ENSGALG00000024449,ENSGALG00000004249,ENSGALG00000002080,ENSGALG00000031410,ENSGALG00000031099,ENSGALG00000002958,ENSGALG00000002515,ENSGALG00000016444,ENSGALG00000004747,ENSGALG00000041640,ENSGALG00000012018,ENSGALG00000010170,ENSGALG00000029596,ENSGALG00000031890,ENSGALG00000009415,ENSGALG00000016684,ENSGALG00000031122,ENSGALG00000001079,…
GO:0032501	multicellular organismal process	biological_process	2.33e-08	6.63e-06	794	2696	3600	14096	ENSGALG00000040023,ENSGALG00000010949,ENSGALG00000036678,ENSGALG00000027512,ENSGALG00000009755,ENSGALG00000015410,ENSGALG00000034907,ENSGALG00000013604,ENSGALG00000010269,ENSGALG00000016744,ENSGALG00000016680,ENSGALG00000017091,ENSGALG00000014686,ENSGALG00000013085,ENSGALG00000003855,ENSGALG00000003770,ENSGALG00000012775,ENSGALG00000028682,ENSGALG00000005842,ENSGALG00000007226,ENSGALG00000002988,…
GO:0055086	nucleobase-containing small molecule metabolic process	biological_process	2.4e-08	6.71e-06	127	2696	426	14096	Novel02589,ENSGALG00000005961,ENSGALG00000032465,ENSGALG00000003837,ENSGALG00000038672,ENSGALG00000004302,ENSGALG00000038801,ENSGALG00000029172,ENSGALG00000004809,ENSGALG00000028210,ENSGALG00000014447,ENSGALG00000007606,ENSGALG00000043768,ENSGALG00000033271,ENSGALG00000016524,Novel00594,ENSGALG00000007936,ENSGALG00000036625,ENSGALG00000000629,ENSGALG00000011020,ENSGALG00000029150,ENSGALG000000343…
GO:0072521	purine-containing compound metabolic process	biological_process	2.65e-08	7.31e-06	100	2696	315	14096	ENSGALG00000011020,ENSGALG00000000629,ENSGALG00000036625,ENSGALG00000029150,ENSGALG00000033271,Novel00594,ENSGALG00000007936,ENSGALG00000004956,ENSGALG00000034397,ENSGALG00000001452,ENSGALG00000038672,ENSGALG00000004302,ENSGALG00000003837,ENSGALG00000032465,Novel02589,ENSGALG00000005961,ENSGALG00000007606,ENSGALG00000043768,ENSGALG00000029172,ENSGALG00000004809,ENSGALG00000038801,ENSGALG000000144…
GO:0048856	anatomical structure development	biological_process	2.73e-08	7.41e-06	668	2696	2978	14096	ENSGALG00000003473,ENSGALG00000011355,ENSGALG00000009352,ENSGALG00000017122,ENSGALG00000035733,ENSGALG00000002125,ENSGALG00000042458,ENSGALG00000039322,ENSGALG00000001780,ENSGALG00000008702,ENSGALG00000021135,ENSGALG00000002775,ENSGALG00000010551,ENSGALG00000023420,ENSGALG00000010005,ENSGALG00000034458,ENSGALG00000037352,ENSGALG00000017119,ENSGALG00000010163,ENSGALG00000003647,ENSGALG00000009270,…
GO:0044707	single-multicellular organism process	biological_process	3.3e-08	8.84e-06	770	2696	3487	14096	ENSGALG00000016744,ENSGALG00000016680,ENSGALG00000017091,ENSGALG00000015410,ENSGALG00000034907,ENSGALG00000013604,ENSGALG00000010269,ENSGALG00000036678,ENSGALG00000027512,ENSGALG00000010949,ENSGALG00000009755,ENSGALG00000040023,ENSGALG00000002210,ENSGALG00000004741,ENSGALG00000003886,ENSGALG00000007732,ENSGALG00000007226,ENSGALG00000040993,ENSGALG00000002988,ENSGALG00000014686,ENSGALG00000013085,…
GO:0006120	mitochondrial electron transport, NADH to ubiquinone	biological_process	4.27e-08	1.13e-05	13	2696	15	14096	ENSGALG00000043768,ENSGALG00000013191,ENSGALG00000029172,Novel00714,ENSGALG00000036229,ENSGALG00000036625,ENSGALG00000000629,ENSGALG00000005704,ENSGALG00000007931,ENSGALG00000004302,ENSGALG00000001184,ENSGALG00000037593,Novel02589
GO:0015672	monovalent inorganic cation transport	biological_process	4.51e-08	1.17e-05	113	2696	372	14096	ENSGALG00000013971,ENSGALG00000016017,ENSGALG00000025819,ENSGALG00000027963,ENSGALG00000007205,ENSGALG00000032465,ENSGALG00000004376,ENSGALG00000028302,ENSGALG00000001181,ENSGALG00000016684,ENSGALG00000011615,ENSGALG00000008593,ENSGALG00000003354,ENSGALG00000038801,ENSGALG00000004809,ENSGALG00000013244,ENSGALG00000021272,ENSGALG00000011005,ENSGALG00000014463,ENSGALG00000038850,ENSGALG00000000367,…
GO:0006163	purine nucleotide metabolic process	biological_process	4.58e-08	1.17e-05	92	2696	286	14096	ENSGALG00000037880,ENSGALG00000004245,ENSGALG00000041091,ENSGALG00000014442,ENSGALG00000006431,ENSGALG00000009095,ENSGALG00000008177,ENSGALG00000002490,ENSGALG00000013604,ENSGALG00000012735,ENSGALG00000030251,ENSGALG00000032079,ENSGALG00000005002,ENSGALG00000014121,ENSGALG00000016564,ENSGALG00000014526,Novel01930,ENSGALG00000034960,ENSGALG00000005749,ENSGALG00000011618,ENSGALG00000007226,ENSGALG0…
GO:0006812	cation transport	biological_process	6.86e-08	1.68e-05	186	2696	692	14096	ENSGALG00000014981,ENSGALG00000009919,ENSGALG00000002621,ENSGALG00000007681,ENSGALG00000007863,ENSGALG00000043287,ENSGALG00000003778,Novel00250,ENSGALG00000034289,ENSGALG00000009705,ENSGALG00000006899,ENSGALG00000006190,ENSGALG00000017380,ENSGALG00000008486,ENSGALG00000004373,ENSGALG00000006753,ENSGALG00000028871,ENSGALG00000004721,ENSGALG00000034895,ENSGALG00000028256,ENSGALG00000034025,ENSGALG0…
GO:0009150	purine ribonucleotide metabolic process	biological_process	7.8e-08	1.84e-05	89	2696	277	14096	ENSGALG00000015233,ENSGALG00000005043,ENSGALG00000006753,ENSGALG00000041470,ENSGALG00000036229,ENSGALG00000029500,ENSGALG00000017380,ENSGALG00000015751,ENSGALG00000042851,ENSGALG00000010379,ENSGALG00000009286,ENSGALG00000014975,ENSGALG00000006098,ENSGALG00000011721,ENSGALG00000007681,ENSGALG00000011035,Novel00714,ENSGALG00000017173,ENSGALG00000015373,ENSGALG00000005704,ENSGALG00000006899,ENSGALG0…
GO:0009119	ribonucleoside metabolic process	biological_process	8.34e-08	1.92e-05	73	2696	214	14096	ENSGALG00000014447,ENSGALG00000038801,ENSGALG00000029172,ENSGALG00000004809,ENSGALG00000007606,ENSGALG00000043768,Novel02589,ENSGALG00000032465,ENSGALG00000004302,ENSGALG00000038672,ENSGALG00000001452,ENSGALG00000034397,ENSGALG00000004956,Novel00594,ENSGALG00000007936,ENSGALG00000033271,ENSGALG00000029150,ENSGALG00000000629,ENSGALG00000036625,ENSGALG00000011020,ENSGALG00000001992,ENSGALG000000080…
GO:0046128	purine ribonucleoside metabolic process	biological_process	8.49e-08	1.93e-05	69	2696	196	14096	ENSGALG00000010379,ENSGALG00000042851,ENSGALG00000006098,ENSGALG00000016708,ENSGALG00000009286,ENSGALG00000005043,ENSGALG00000006753,ENSGALG00000015233,ENSGALG00000036229,ENSGALG00000029500,ENSGALG00000015751,ENSGALG00000017380,ENSGALG00000041470,ENSGALG00000006899,ENSGALG00000005704,ENSGALG00000015373,ENSGALG00000012613,ENSGALG00000011035,Novel00714,ENSGALG00000001330,ENSGALG00000032142,ENSGALG0…
GO:0006753	nucleoside phosphate metabolic process	biological_process	9.37e-08	2.07e-05	114	2696	381	14096	ENSGALG00000002388,ENSGALG00000017295,ENSGALG00000008606,ENSGALG00000003821,Novel01063,ENSGALG00000007931,ENSGALG00000001184,ENSGALG00000014869,ENSGALG00000015544,ENSGALG00000007926,ENSGALG00000015117,ENSGALG00000015854,ENSGALG00000008098,Novel00526,ENSGALG00000015372,ENSGALG00000013191,ENSGALG00000003816,ENSGALG00000026776,ENSGALG00000031397,ENSGALG00000012715,ENSGALG00000001330,ENSGALG000000321…
GO:0007275	multicellular organismal development	biological_process	9.54e-08	2.08e-05	603	2696	2680	14096	ENSGALG00000036625,ENSGALG00000008945,ENSGALG00000014463,ENSGALG00000039985,ENSGALG00000001405,ENSGALG00000005981,ENSGALG00000007786,ENSGALG00000036255,ENSGALG00000010770,ENSGALG00000010857,ENSGALG00000019761,ENSGALG00000014684,ENSGALG00000034048,ENSGALG00000001956,ENSGALG00000010974,ENSGALG00000006106,ENSGALG00000030030,ENSGALG00000028115,ENSGALG00000028302,ENSGALG00000035951,ENSGALG00000023640,…
GO:0042278	purine nucleoside metabolic process	biological_process	1.06e-07	2.23e-05	69	2696	197	14096	ENSGALG00000014442,ENSGALG00000006431,ENSGALG00000037880,ENSGALG00000041091,ENSGALG00000005002,ENSGALG00000014121,ENSGALG00000002490,ENSGALG00000032079,ENSGALG00000011618,ENSGALG00000034960,ENSGALG00000005749,ENSGALG00000014526,Novel01930,ENSGALG00000005789,ENSGALG00000008066,ENSGALG00000001992,ENSGALG00000029150,ENSGALG00000011020,ENSGALG00000036625,ENSGALG00000000629,ENSGALG00000007936,Novel005…
GO:0009259	ribonucleotide metabolic process	biological_process	1.07e-07	2.23e-05	91	2696	287	14096	ENSGALG00000007936,Novel00594,ENSGALG00000033271,ENSGALG00000029150,ENSGALG00000036625,ENSGALG00000000629,ENSGALG00000011020,ENSGALG00000001452,ENSGALG00000034397,ENSGALG00000004956,Novel02589,ENSGALG00000032465,ENSGALG00000038672,ENSGALG00000003837,ENSGALG00000004302,ENSGALG00000014447,ENSGALG00000038801,ENSGALG00000004809,ENSGALG00000029172,ENSGALG00000007606,ENSGALG00000043768,ENSGALG000000378…
GO:0006082	organic acid metabolic process	biological_process	1.17e-07	2.4e-05	160	2696	583	14096	ENSGALG00000037203,ENSGALG00000016102,ENSGALG00000000184,ENSGALG00000013191,ENSGALG00000026776,ENSGALG00000010211,Novel01500,ENSGALG00000007931,ENSGALG00000030834,ENSGALG00000020943,ENSGALG00000030643,ENSGALG00000008548,ENSGALG00000002321,ENSGALG00000017246,ENSGALG00000000112,ENSGALG00000007484,ENSGALG00000027232,ENSGALG00000029576,ENSGALG00000008440,ENSGALG00000007072,ENSGALG00000026287,Novel013…
GO:0043436	oxoacid metabolic process	biological_process	2e-07	3.93e-05	158	2696	579	14096	ENSGALG00000007904,ENSGALG00000034735,ENSGALG00000005550,ENSGALG00000016444,ENSGALG00000041640,ENSGALG00000012018,ENSGALG00000000913,ENSGALG00000014673,ENSGALG00000039572,ENSGALG00000014442,ENSGALG00000040896,ENSGALG00000033461,ENSGALG00000024271,ENSGALG00000041401,ENSGALG00000001992,ENSGALG00000003193,ENSGALG00000003972,ENSGALG00000029102,ENSGALG00000015961,ENSGALG00000014526,ENSGALG00000001557,…
GO:0009116	nucleoside metabolic process	biological_process	2.33e-07	4.54e-05	75	2696	227	14096	ENSGALG00000034397,ENSGALG00000001452,ENSGALG00000007191,ENSGALG00000004956,ENSGALG00000033271,Novel00594,ENSGALG00000007936,ENSGALG00000000629,ENSGALG00000036625,ENSGALG00000011020,ENSGALG00000029150,ENSGALG00000038801,ENSGALG00000004809,ENSGALG00000029172,ENSGALG00000014447,ENSGALG00000028210,ENSGALG00000007606,ENSGALG00000043768,Novel02589,ENSGALG00000032465,ENSGALG00000038672,ENSGALG000000043…
GO:0009117	nucleotide metabolic process	biological_process	2.43e-07	4.6e-05	111	2696	375	14096	ENSGALG00000007926,ENSGALG00000015544,Novel01063,ENSGALG00000001184,ENSGALG00000007931,ENSGALG00000014869,Novel00526,ENSGALG00000008098,ENSGALG00000015117,ENSGALG00000015854,ENSGALG00000008606,ENSGALG00000002388,ENSGALG00000017295,ENSGALG00000003821,ENSGALG00000001330,ENSGALG00000032142,ENSGALG00000002082,ENSGALG00000010542,ENSGALG00000008855,ENSGALG00000037593,ENSGALG00000040035,ENSGALG000000267…
GO:0051094	positive regulation of developmental process	biological_process	2.97e-07	5.49e-05	185	2696	703	14096	ENSGALG00000007416,ENSGALG00000042351,ENSGALG00000002864,ENSGALG00000011541,ENSGALG00000031890,ENSGALG00000039209,ENSGALG00000041640,ENSGALG00000016564,ENSGALG00000002515,ENSGALG00000008716,ENSGALG00000006216,ENSGALG00000014496,ENSGALG00000038848,ENSGALG00000000311,ENSGALG00000032545,ENSGALG00000042045,ENSGALG00000042604,ENSGALG00000024449,ENSGALG00000040180,ENSGALG00000009740,ENSGALG00000011274,…
GO:0006086	acetyl-CoA biosynthetic process from pyruvate	biological_process	3.27e-07	5.87e-05	9	2696	9	14096	ENSGALG00000016430,ENSGALG00000011483,ENSGALG00000029576,ENSGALG00000007931,ENSGALG00000013235,ENSGALG00000007904,ENSGALG00000036853,ENSGALG00000016323,ENSGALG00000009700
GO:0098662	inorganic cation transmembrane transport	biological_process	3.29e-07	5.87e-05	107	2696	361	14096	ENSGALG00000007863,ENSGALG00000043287,Novel00250,ENSGALG00000009919,ENSGALG00000009705,ENSGALG00000006899,ENSGALG00000005215,ENSGALG00000006190,ENSGALG00000009995,ENSGALG00000004373,ENSGALG00000006753,ENSGALG00000020505,ENSGALG00000014848,ENSGALG00000015233,ENSGALG00000006635,ENSGALG00000004240,ENSGALG00000027483,ENSGALG00000017380,ENSGALG00000015751,ENSGALG00000008486,ENSGALG00000035334,Novel009…
GO:0019693	ribose phosphate metabolic process	biological_process	4.02e-07	7.06e-05	91	2696	295	14096	ENSGALG00000005043,ENSGALG00000006753,ENSGALG00000015233,ENSGALG00000029500,ENSGALG00000015751,ENSGALG00000017380,ENSGALG00000036229,ENSGALG00000041470,ENSGALG00000010379,ENSGALG00000042851,ENSGALG00000006098,ENSGALG00000014975,ENSGALG00000009286,ENSGALG00000007681,ENSGALG00000011721,Novel00714,ENSGALG00000011035,ENSGALG00000005704,ENSGALG00000006899,ENSGALG00000015373,ENSGALG00000017173,ENSGALG0…
GO:0006936	muscle contraction	biological_process	4.47e-07	7.63e-05	55	2696	151	14096	ENSGALG00000000820,ENSGALG00000038787,ENSGALG00000011481,ENSGALG00000007409,ENSGALG00000013191,ENSGALG00000029694,ENSGALG00000014463,ENSGALG00000040035,ENSGALG00000009089,ENSGALG00000008351,ENSGALG00000014952,ENSGALG00000012790,ENSGALG00000002860,ENSGALG00000014695,ENSGALG00000007048,ENSGALG00000000585,ENSGALG00000003521,ENSGALG00000002125,ENSGALG00000037138,ENSGALG00000001021,ENSGALG00000021272,…
GO:0098660	inorganic ion transmembrane transport	biological_process	5.49e-07	9.29e-05	118	2696	412	14096	ENSGALG00000037138,ENSGALG00000041791,ENSGALG00000000745,ENSGALG00000034025,ENSGALG00000011897,Novel01063,ENSGALG00000007926,ENSGALG00000017271,ENSGALG00000015372,ENSGALG00000012111,ENSGALG00000016185,ENSGALG00000004980,ENSGALG00000001330,ENSGALG00000008206,ENSGALG00000011250,ENSGALG00000008351,ENSGALG00000034427,ENSGALG00000036360,ENSGALG00000010943,Novel00250,ENSGALG00000007863,ENSGALG000000432…
GO:1901657	glycosyl compound metabolic process	biological_process	5.82e-07	9.75e-05	76	2696	236	14096	Novel00714,ENSGALG00000011035,ENSGALG00000006899,ENSGALG00000005704,ENSGALG00000015373,ENSGALG00000012613,ENSGALG00000005043,ENSGALG00000006753,ENSGALG00000015233,ENSGALG00000029500,ENSGALG00000017380,ENSGALG00000015751,ENSGALG00000036229,ENSGALG00000041470,ENSGALG00000010379,ENSGALG00000042851,ENSGALG00000006098,ENSGALG00000009286,ENSGALG00000016708,ENSGALG00000008606,ENSGALG00000002388,ENSGALG0…
GO:0006085	acetyl-CoA biosynthetic process	biological_process	6.07e-07	0.00010075	11	2696	13	14096	ENSGALG00000016430,ENSGALG00000011483,ENSGALG00000003362,ENSGALG00000029576,ENSGALG00000007931,ENSGALG00000013235,ENSGALG00000003475,ENSGALG00000007904,ENSGALG00000036853,ENSGALG00000009700,ENSGALG00000016323
GO:0034765	regulation of ion transmembrane transport	biological_process	6.63e-07	0.00010898	66	2696	195	14096	ENSGALG00000009919,ENSGALG00000016707,ENSGALG00000014994,ENSGALG00000043287,ENSGALG00000035799,ENSGALG00000009995,ENSGALG00000005215,ENSGALG00000006190,ENSGALG00000008486,ENSGALG00000027483,ENSGALG00000020505,ENSGALG00000014848,ENSGALG00000015233,ENSGALG00000004373,ENSGALG00000026287,ENSGALG00000004721,ENSGALG00000034895,ENSGALG00000014873,ENSGALG00000041791,ENSGALG00000012155,ENSGALG00000037138,…
GO:0032787	monocarboxylic acid metabolic process	biological_process	7.11e-07	0.00011585	91	2696	300	14096	ENSGALG00000009700,ENSGALG00000017246,ENSGALG00000000112,ENSGALG00000027232,ENSGALG00000030834,ENSGALG00000007931,ENSGALG00000020943,ENSGALG00000013297,ENSGALG00000015544,ENSGALG00000010628,ENSGALG00000003582,ENSGALG00000008795,ENSGALG00000013191,ENSGALG00000006644,ENSGALG00000008040,ENSGALG00000026776,ENSGALG00000031563,ENSGALG00000016102,ENSGALG00000007716,ENSGALG00000016536,ENSGALG00000034502,…
GO:0035384	thioester biosynthetic process	biological_process	9.65e-07	0.00015005	14	2696	20	14096	ENSGALG00000016323,ENSGALG00000009700,ENSGALG00000005043,ENSGALG00000007904,ENSGALG00000036853,ENSGALG00000003475,ENSGALG00000015876,ENSGALG00000003362,ENSGALG00000007931,ENSGALG00000029576,ENSGALG00000013235,ENSGALG00000010379,ENSGALG00000011483,ENSGALG00000016430
GO:0071616	acyl-CoA biosynthetic process	biological_process	9.65e-07	0.00015005	14	2696	20	14096	ENSGALG00000016430,ENSGALG00000013235,ENSGALG00000015876,ENSGALG00000003362,ENSGALG00000029576,ENSGALG00000007931,ENSGALG00000010379,ENSGALG00000011483,ENSGALG00000036853,ENSGALG00000007904,ENSGALG00000003475,ENSGALG00000016323,ENSGALG00000009700,ENSGALG00000005043
GO:0003012	muscle system process	biological_process	1.07e-06	0.00016358	63	2696	185	14096	ENSGALG00000001416,ENSGALG00000008177,ENSGALG00000010357,ENSGALG00000043555,ENSGALG00000009519,Novel01312,ENSGALG00000014813,ENSGALG00000019157,ENSGALG00000014848,ENSGALG00000015142,ENSGALG00000015233,ENSGALG00000037744,ENSGALG00000027583,ENSGALG00000012735,ENSGALG00000008486,ENSGALG00000016342,ENSGALG00000006835,Novel01024,ENSGALG00000002845,ENSGALG00000012783,ENSGALG00000006591,ENSGALG000000427…
GO:0060560	developmental growth involved in morphogenesis	biological_process	1.28e-06	0.00019249	55	2696	157	14096	ENSGALG00000001916,ENSGALG00000015944,ENSGALG00000006560,ENSGALG00000029261,ENSGALG00000004386,ENSGALG00000001124,ENSGALG00000010664,ENSGALG00000006563,ENSGALG00000031255,ENSGALG00000032039,ENSGALG00000008609,ENSGALG00000011562,ENSGALG00000004631,ENSGALG00000004526,ENSGALG00000008733,ENSGALG00000030643,ENSGALG00000043185,ENSGALG00000017295,ENSGALG00000040256,ENSGALG00000003473,ENSGALG00000009241,…
GO:0042391	regulation of membrane potential	biological_process	1.36e-06	0.00020251	66	2696	200	14096	ENSGALG00000000745,ENSGALG00000005801,ENSGALG00000008606,ENSGALG00000037138,ENSGALG00000004096,ENSGALG00000014873,ENSGALG00000034025,ENSGALG00000011562,ENSGALG00000007931,ENSGALG00000011009,ENSGALG00000027415,ENSGALG00000004980,ENSGALG00000040938,ENSGALG00000013907,ENSGALG00000034427,ENSGALG00000007899,ENSGALG00000008351,ENSGALG00000035559,ENSGALG00000012790,ENSGALG00000027420,ENSGALG00000037593,…
GO:0001649	osteoblast differentiation	biological_process	1.57e-06	0.00023224	53	2696	149	14096	ENSGALG00000030030,ENSGALG00000003473,ENSGALG00000008676,ENSGALG00000009241,ENSGALG00000017295,ENSGALG00000007364,ENSGALG00000038768,ENSGALG00000039322,ENSGALG00000014873,ENSGALG00000038801,ENSGALG00000001079,ENSGALG00000042657,ENSGALG00000015624,ENSGALG00000004893,ENSGALG00000031960,ENSGALG00000039200,ENSGALG00000042422,ENSGALG00000009129,ENSGALG00000001729,ENSGALG00000003114,ENSGALG00000005981,…
GO:2000026	regulation of multicellular organismal development	biological_process	1.79e-06	0.00026258	250	2696	1014	14096	ENSGALG00000003282,ENSGALG00000026214,ENSGALG00000026080,ENSGALG00000024047,ENSGALG00000009971,ENSGALG00000038540,ENSGALG00000002363,ENSGALG00000041273,ENSGALG00000006796,ENSGALG00000032748,ENSGALG00000031112,ENSGALG00000040755,ENSGALG00000043287,ENSGALG00000008514,ENSGALG00000016830,ENSGALG00000013956,ENSGALG00000041094,ENSGALG00000029140,ENSGALG00000008875,ENSGALG00000007582,ENSGALG00000015132,…
GO:0043269	regulation of ion transport	biological_process	1.84e-06	0.00026769	90	2696	299	14096	ENSGALG00000014848,ENSGALG00000020505,ENSGALG00000015233,ENSGALG00000004373,ENSGALG00000008486,ENSGALG00000010029,ENSGALG00000027483,ENSGALG00000000604,ENSGALG00000010357,ENSGALG00000010379,ENSGALG00000026287,ENSGALG00000004721,ENSGALG00000034895,ENSGALG00000014994,ENSGALG00000043287,ENSGALG00000009919,ENSGALG00000016707,ENSGALG00000006190,ENSGALG00000005215,ENSGALG00000035799,ENSGALG00000009995,…
GO:0001655	urogenital system development	biological_process	1.87e-06	0.00027008	71	2696	222	14096	ENSGALG00000012873,ENSGALG00000003114,ENSGALG00000030643,ENSGALG00000029197,ENSGALG00000032039,ENSGALG00000001141,ENSGALG00000029301,ENSGALG00000017334,ENSGALG00000000498,ENSGALG00000038612,ENSGALG00000037203,ENSGALG00000012644,ENSGALG00000036798,ENSGALG00000001097,ENSGALG00000040582,ENSGALG00000010664,ENSGALG00000004386,ENSGALG00000014872,ENSGALG00000038540,ENSGALG00000038512,ENSGALG00000034346,…
GO:0048513	organ development	biological_process	1.93e-06	0.00027732	421	2696	1823	14096	ENSGALG00000031144,ENSGALG00000014267,ENSGALG00000029270,ENSGALG00000013968,ENSGALG00000010997,ENSGALG00000010027,ENSGALG00000008747,ENSGALG00000005292,ENSGALG00000009641,ENSGALG00000005849,ENSGALG00000013793,ENSGALG00000001452,ENSGALG00000016332,ENSGALG00000038672,ENSGALG00000031255,ENSGALG00000013626,ENSGALG00000003045,ENSGALG00000030991,ENSGALG00000026862,ENSGALG00000043185,ENSGALG00000026811,…
GO:0032502	developmental process	biological_process	2.32e-06	0.00032245	718	2696	3291	14096	ENSGALG00000008676,ENSGALG00000006598,ENSGALG00000004794,ENSGALG00000032702,ENSGALG00000039238,ENSGALG00000003595,ENSGALG00000013626,ENSGALG00000038672,ENSGALG00000016332,Novel00276,ENSGALG00000026862,ENSGALG00000030991,ENSGALG00000001475,ENSGALG00000005451,ENSGALG00000043185,ENSGALG00000026811,ENSGALG00000010476,ENSGALG00000013971,ENSGALG00000009641,ENSGALG00000005292,ENSGALG00000013793,ENSGALG0…
GO:0048705	skeletal system morphogenesis	biological_process	2.39e-06	0.00032511	60	2696	177	14096	ENSGALG00000003114,ENSGALG00000023420,ENSGALG00000043185,ENSGALG00000009129,ENSGALG00000028091,ENSGALG00000027213,ENSGALG00000039200,ENSGALG00000019761,ENSGALG00000032584,ENSGALG00000003324,ENSGALG00000039322,ENSGALG00000017295,ENSGALG00000006725,ENSGALG00000010974,ENSGALG00000003473,ENSGALG00000009948,ENSGALG00000009241,ENSGALG00000039040,ENSGALG00000037687,ENSGALG00000037619,ENSGALG00000008135,…
GO:0034762	regulation of transmembrane transport	biological_process	2.5e-06	0.00033628	67	2696	206	14096	ENSGALG00000008456,ENSGALG00000001512,ENSGALG00000014813,ENSGALG00000007623,ENSGALG00000010269,ENSGALG00000025788,ENSGALG00000005332,ENSGALG00000004074,ENSGALG00000027583,ENSGALG00000041640,ENSGALG00000003833,ENSGALG00000034621,ENSGALG00000032986,ENSGALG00000002277,ENSGALG00000043764,ENSGALG00000015018,ENSGALG00000016281,ENSGALG00000007980,ENSGALG00000014463,ENSGALG00000038850,ENSGALG00000000367,…
GO:0001503	ossification	biological_process	2.6e-06	0.00034452	77	2696	247	14096	ENSGALG00000041555,ENSGALG00000009415,ENSGALG00000010170,ENSGALG00000040896,ENSGALG00000010927,ENSGALG00000041640,ENSGALG00000016564,ENSGALG00000005985,ENSGALG00000004274,ENSGALG00000008007,ENSGALG00000007226,ENSGALG00000039990,ENSGALG00000035052,ENSGALG00000014686,ENSGALG00000003770,ENSGALG00000005842,ENSGALG00000012775,ENSGALG00000026525,ENSGALG00000038848,ENSGALG00000019873,ENSGALG00000005476,…
GO:0003401	axis elongation	biological_process	3.63e-06	0.00047433	15	2696	24	14096	ENSGALG00000042657,ENSGALG00000012973,ENSGALG00000006379,ENSGALG00000034346,ENSGALG00000004386,ENSGALG00000009241,ENSGALG00000003473,ENSGALG00000003767,ENSGALG00000014872,ENSGALG00000030643,ENSGALG00000017389,ENSGALG00000031255,ENSGALG00000032039,ENSGALG00000008609,ENSGALG00000000839
GO:0009653	anatomical structure morphogenesis	biological_process	3.82e-06	0.00049572	383	2696	1654	14096	ENSGALG00000006099,ENSGALG00000002298,ENSGALG00000037576,ENSGALG00000016945,ENSGALG00000026285,ENSGALG00000028721,ENSGALG00000008823,ENSGALG00000002707,ENSGALG00000021572,ENSGALG00000016281,ENSGALG00000028069,ENSGALG00000008716,ENSGALG00000003314,ENSGALG00000029811,ENSGALG00000010859,ENSGALG00000038848,ENSGALG00000004161,ENSGALG00000000311,ENSGALG00000003148,ENSGALG00000032545,ENSGALG00000041263,…
GO:0086009	membrane repolarization	biological_process	3.89e-06	0.00050129	15	2696	24	14096	ENSGALG00000004376,ENSGALG00000007666,ENSGALG00000008351,ENSGALG00000001512,ENSGALG00000009995,ENSGALG00000034895,ENSGALG00000029694,ENSGALG00000007409,ENSGALG00000043287,ENSGALG00000015233,ENSGALG00000037138,ENSGALG00000015018,ENSGALG00000014873,ENSGALG00000008486,ENSGALG00000005332
GO:0019752	carboxylic acid metabolic process	biological_process	4.39e-06	0.00055802	144	2696	538	14096	ENSGALG00000007072,ENSGALG00000026287,ENSGALG00000029576,ENSGALG00000026757,ENSGALG00000041470,ENSGALG00000036853,Novel01306,ENSGALG00000012613,ENSGALG00000029140,ENSGALG00000034346,ENSGALG00000043307,ENSGALG00000043287,ENSGALG00000000184,ENSGALG00000016102,Novel01500,ENSGALG00000026776,ENSGALG00000010211,ENSGALG00000013191,ENSGALG00000008548,ENSGALG00000030834,ENSGALG00000007931,ENSGALG000000209…
GO:0044767	single-organism developmental process	biological_process	4.76e-06	0.0006009	708	2696	3254	14096	ENSGALG00000038629,ENSGALG00000041273,ENSGALG00000031112,ENSGALG00000006796,ENSGALG00000040755,ENSGALG00000003282,ENSGALG00000026214,ENSGALG00000016375,ENSGALG00000030607,ENSGALG00000009971,ENSGALG00000010881,ENSGALG00000029000,ENSGALG00000003660,ENSGALG00000001565,ENSGALG00000035950,ENSGALG00000014759,ENSGALG00000007821,ENSGALG00000007993,ENSGALG00000038813,ENSGALG00000011740,ENSGALG00000043727,…
GO:0006793	phosphorus metabolic process	biological_process	5.43e-06	0.00067988	451	2696	1985	14096	ENSGALG00000042624,ENSGALG00000040672,ENSGALG00000007606,ENSGALG00000006598,ENSGALG00000016959,ENSGALG00000001021,ENSGALG00000012792,ENSGALG00000001946,ENSGALG00000002671,ENSGALG00000003354,ENSGALG00000029172,ENSGALG00000042657,ENSGALG00000016332,ENSGALG00000031255,ENSGALG00000004302,ENSGALG00000003837,ENSGALG00000038672,ENSGALG00000002283,ENSGALG00000004004,ENSGALG00000037603,ENSGALG00000013971,…
GO:0060429	epithelium development	biological_process	5.53e-06	0.00068882	170	2696	656	14096	ENSGALG00000028091,ENSGALG00000012873,ENSGALG00000030643,ENSGALG00000010825,ENSGALG00000001141,ENSGALG00000032039,ENSGALG00000042422,ENSGALG00000006503,ENSGALG00000009241,ENSGALG00000006821,ENSGALG00000002108,ENSGALG00000012155,ENSGALG00000029301,ENSGALG00000017334,ENSGALG00000008701,ENSGALG00000010936,ENSGALG00000037203,ENSGALG00000036798,ENSGALG00000016102,ENSGALG00000000902,ENSGALG00000015480,…
GO:0009060	aerobic respiration	biological_process	5.99e-06	0.00073029	19	2696	36	14096	ENSGALG00000014155,ENSGALG00000010476,ENSGALG00000011950,ENSGALG00000010286,ENSGALG00000015961,ENSGALG00000008066,ENSGALG00000005789,ENSGALG00000019967,ENSGALG00000013167,ENSGALG00000013165,ENSGALG00000032142,ENSGALG00000029576,ENSGALG00000041401,ENSGALG00000036360,ENSGALG00000001949,ENSGALG00000001375,ENSGALG00000008858,ENSGALG00000002490,ENSGALG00000035334
GO:0002027	regulation of heart rate	biological_process	5.99e-06	0.00073029	24	2696	51	14096	ENSGALG00000004376,ENSGALG00000034716,ENSGALG00000003521,ENSGALG00000043287,ENSGALG00000037138,ENSGALG00000004096,ENSGALG00000015018,ENSGALG00000016281,ENSGALG00000021272,ENSGALG00000008351,ENSGALG00000012790,ENSGALG00000008486,ENSGALG00000012735,ENSGALG00000005332,ENSGALG00000002845,ENSGALG00000015410,ENSGALG00000003588,ENSGALG00000007409,ENSGALG00000011481,ENSGALG00000015142,ENSGALG00000006560,…
GO:0009887	organ morphogenesis	biological_process	6.29e-06	0.00076126	164	2696	629	14096	ENSGALG00000004249,ENSGALG00000014496,ENSGALG00000038848,ENSGALG00000004161,ENSGALG00000042045,ENSGALG00000028069,ENSGALG00000029596,ENSGALG00000010935,ENSGALG00000006099,ENSGALG00000015768,ENSGALG00000037576,ENSGALG00000002515,ENSGALG00000002958,ENSGALG00000002298,ENSGALG00000041640,ENSGALG00000008609,ENSGALG00000030932,ENSGALG00000019761,ENSGALG00000036082,ENSGALG00000006725,ENSGALG00000010974,…
GO:0006631	fatty acid metabolic process	biological_process	9.23e-06	0.0011033	58	2696	177	14096	ENSGALG00000030886,ENSGALG00000000184,ENSGALG00000016536,ENSGALG00000034502,ENSGALG00000013235,ENSGALG00000040504,ENSGALG00000031563,ENSGALG00000002781,ENSGALG00000002925,ENSGALG00000008040,ENSGALG00000013191,ENSGALG00000006644,ENSGALG00000000943,ENSGALG00000010785,ENSGALG00000008795,ENSGALG00000002775,ENSGALG00000036990,ENSGALG00000037603,ENSGALG00000010628,ENSGALG00000027232,ENSGALG00000000112,…
GO:0048468	cell development	biological_process	9.74e-06	0.0011557	302	2696	1278	14096	ENSGALG00000016684,ENSGALG00000031122,ENSGALG00000014999,ENSGALG00000031427,ENSGALG00000001079,ENSGALG00000006725,ENSGALG00000040256,ENSGALG00000008733,ENSGALG00000031423,ENSGALG00000012462,ENSGALG00000019019,ENSGALG00000006563,ENSGALG00000008262,ENSGALG00000030603,ENSGALG00000003135,ENSGALG00000007242,ENSGALG00000029788,ENSGALG00000026276,ENSGALG00000000059,ENSGALG00000013293,ENSGALG00000004097,…
GO:0001822	kidney development	biological_process	1.08e-05	0.0012634	59	2696	182	14096	ENSGALG00000005256,ENSGALG00000011288,ENSGALG00000011117,ENSGALG00000014227,ENSGALG00000043555,ENSGALG00000017389,ENSGALG00000015593,ENSGALG00000009519,ENSGALG00000009302,ENSGALG00000000839,ENSGALG00000005554,ENSGALG00000009724,ENSGALG00000001449,ENSGALG00000040834,ENSGALG00000006379,ENSGALG00000014944,ENSGALG00000011358,ENSGALG00000008969,ENSGALG00000015166,ENSGALG00000016680,ENSGALG00000016444,…
GO:0006941	striated muscle contraction	biological_process	1.27e-05	0.0014605	30	2696	73	14096	ENSGALG00000002845,ENSGALG00000008486,ENSGALG00000006835,ENSGALG00000006591,ENSGALG00000015233,ENSGALG00000015142,ENSGALG00000011481,ENSGALG00000007409,ENSGALG00000029694,ENSGALG00000027583,ENSGALG00000009089,ENSGALG00000019157,ENSGALG00000014813,ENSGALG00000001416,ENSGALG00000012790,ENSGALG00000008351,ENSGALG00000007048,ENSGALG00000009519,ENSGALG00000008177,ENSGALG00000000585,ENSGALG00000003521,…
GO:0035113	embryonic appendage morphogenesis	biological_process	1.45e-05	0.0016391	39	2696	106	14096	ENSGALG00000041640,ENSGALG00000006379,ENSGALG00000038355,ENSGALG00000009724,ENSGALG00000011347,ENSGALG00000010170,ENSGALG00000000839,ENSGALG00000040276,ENSGALG00000005285,ENSGALG00000007706,ENSGALG00000034346,ENSGALG00000029140,ENSGALG00000038848,ENSGALG00000005123,ENSGALG00000014686,ENSGALG00000030607,ENSGALG00000038540,ENSGALG00000009274,ENSGALG00000015013,ENSGALG00000016102,ENSGALG00000037203,…
GO:0072079	nephron tubule formation	biological_process	1.46e-05	0.0016437	12	2696	18	14096	ENSGALG00000029270,ENSGALG00000030991,ENSGALG00000003114,ENSGALG00000017389,ENSGALG00000037203,ENSGALG00000001141,ENSGALG00000001097,ENSGALG00000009724,ENSGALG00000042045,ENSGALG00000011358,ENSGALG00000004386,ENSGALG00000013193
GO:0008016	regulation of heart contraction	biological_process	1.81e-05	0.002011	35	2696	92	14096	ENSGALG00000042744,ENSGALG00000034716,ENSGALG00000000949,ENSGALG00000043287,ENSGALG00000015018,ENSGALG00000016281,ENSGALG00000011117,ENSGALG00000034895,ENSGALG00000008456,ENSGALG00000001416,ENSGALG00000008177,ENSGALG00000008486,ENSGALG00000005332,ENSGALG00000012735,ENSGALG00000002845,ENSGALG00000015410,ENSGALG00000015233,ENSGALG00000015142,ENSGALG00000027583,ENSGALG00000004376,ENSGALG00000000585,…
GO:0072001	renal system development	biological_process	1.81e-05	0.002011	61	2696	193	14096	ENSGALG00000039238,ENSGALG00000032702,ENSGALG00000003473,ENSGALG00000030643,ENSGALG00000003114,ENSGALG00000030991,ENSGALG00000031255,ENSGALG00000001141,ENSGALG00000029197,ENSGALG00000010664,ENSGALG00000040582,ENSGALG00000001097,ENSGALG00000015519,ENSGALG00000010163,ENSGALG00000004386,ENSGALG00000008747,ENSGALG00000029270,ENSGALG00000009690,ENSGALG00000029301,ENSGALG00000017334,ENSGALG00000037203,…
GO:0006101	citrate metabolic process	biological_process	1.87e-05	0.0020669	11	2696	16	14096	ENSGALG00000015961,ENSGALG00000008858,ENSGALG00000010286,ENSGALG00000013165,ENSGALG00000003475,ENSGALG00000013167,ENSGALG00000001949,ENSGALG00000041401,ENSGALG00000029576,ENSGALG00000014155,ENSGALG00000011950
GO:0043588	skin development	biological_process	1.89e-05	0.0020831	37	2696	100	14096	ENSGALG00000035157,ENSGALG00000009641,ENSGALG00000026276,ENSGALG00000037687,ENSGALG00000001405,ENSGALG00000037203,ENSGALG00000016102,ENSGALG00000012790,ENSGALG00000000902,ENSGALG00000003647,ENSGALG00000038495,ENSGALG00000010798,ENSGALG00000004794,ENSGALG00000011355,ENSGALG00000032702,ENSGALG00000028115,ENSGALG00000026862,ENSGALG00000002775,ENSGALG00000008702,ENSGALG00000031862,ENSGALG00000006379,…
GO:1903522	regulation of blood circulation	biological_process	1.97e-05	0.002145	43	2696	122	14096	ENSGALG00000038512,ENSGALG00000000949,ENSGALG00000034716,ENSGALG00000016281,ENSGALG00000043287,ENSGALG00000015018,ENSGALG00000014984,Novel01675,ENSGALG00000042744,ENSGALG00000015410,ENSGALG00000008486,ENSGALG00000005332,ENSGALG00000012735,ENSGALG00000002845,ENSGALG00000027583,ENSGALG00000012419,ENSGALG00000015142,ENSGALG00000015233,ENSGALG00000008456,ENSGALG00000034895,ENSGALG00000011117,ENSGALG0…
GO:0030154	cell differentiation	biological_process	1.97e-05	0.002145	476	2696	2129	14096	ENSGALG00000031112,ENSGALG00000032748,ENSGALG00000041299,ENSGALG00000016830,ENSGALG00000043287,ENSGALG00000041273,ENSGALG00000038629,ENSGALG00000007511,ENSGALG00000007582,ENSGALG00000041094,ENSGALG00000026214,ENSGALG00000024047,ENSGALG00000003282,ENSGALG00000010881,ENSGALG00000030607,ENSGALG00000035950,ENSGALG00000041470,ENSGALG00000038813,ENSGALG00000000516,ENSGALG00000011740,ENSGALG00000014759,…
GO:0060993	kidney morphogenesis	biological_process	2.22e-05	0.0023989	30	2696	75	14096	ENSGALG00000009724,ENSGALG00000001097,ENSGALG00000006379,ENSGALG00000010664,ENSGALG00000040834,ENSGALG00000004386,ENSGALG00000015166,ENSGALG00000011358,ENSGALG00000014944,ENSGALG00000029270,ENSGALG00000029301,ENSGALG00000017334,ENSGALG00000011117,ENSGALG00000009302,ENSGALG00000007668,ENSGALG00000043555,ENSGALG00000017389,ENSGALG00000012644,ENSGALG00000000839,ENSGALG00000037203,ENSGALG00000042045,…
GO:0006818	hydrogen transport	biological_process	2.31e-05	0.0024742	39	2696	107	14096	ENSGALG00000008206,ENSGALG00000001330,ENSGALG00000001452,ENSGALG00000035144,Novel01601,ENSGALG00000015372,ENSGALG00000016017,ENSGALG00000007205,ENSGALG00000025819,ENSGALG00000027963,Novel01063,ENSGALG00000014869,ENSGALG00000032465,ENSGALG00000007926,ENSGALG00000008593,ENSGALG00000028302,ENSGALG00000004809,ENSGALG00000038801,ENSGALG00000009286,ENSGALG00000037880,ENSGALG00000041091,ENSGALG000000044…
GO:0035107	appendage morphogenesis	biological_process	2.33e-05	0.0024826	43	2696	123	14096	ENSGALG00000037203,ENSGALG00000016102,ENSGALG00000015013,ENSGALG00000009270,ENSGALG00000007668,ENSGALG00000023195,ENSGALG00000037687,ENSGALG00000009274,ENSGALG00000004386,ENSGALG00000032039,ENSGALG00000032584,ENSGALG00000031960,ENSGALG00000003114,ENSGALG00000035237,ENSGALG00000035725,ENSGALG00000027213,ENSGALG00000009129,ENSGALG00000009241,ENSGALG00000030030,ENSGALG00000039238,ENSGALG00000003324,…
GO:0072073	kidney epithelium development	biological_process	2.37e-05	0.0025181	39	2696	108	14096	ENSGALG00000017389,ENSGALG00000043555,ENSGALG00000015593,ENSGALG00000009519,ENSGALG00000000839,ENSGALG00000005256,ENSGALG00000011117,ENSGALG00000011358,ENSGALG00000016680,ENSGALG00000008969,ENSGALG00000005554,ENSGALG00000009724,ENSGALG00000040834,ENSGALG00000006379,ENSGALG00000029811,ENSGALG00000013085,ENSGALG00000014496,ENSGALG00000013193,ENSGALG00000036133,ENSGALG00000042045,ENSGALG00000006802,…
GO:0086001	cardiac muscle cell action potential	biological_process	2.77e-05	0.002916	15	2696	27	14096	ENSGALG00000021272,ENSGALG00000029694,ENSGALG00000016281,ENSGALG00000011481,ENSGALG00000007409,ENSGALG00000043287,ENSGALG00000037138,ENSGALG00000015142,ENSGALG00000008486,ENSGALG00000005332,ENSGALG00000002845,ENSGALG00000004376,ENSGALG00000008351,ENSGALG00000012790,ENSGALG00000034895
GO:0072350	tricarboxylic acid metabolic process	biological_process	2.81e-05	0.0029333	12	2696	19	14096	ENSGALG00000011950,ENSGALG00000041401,ENSGALG00000001949,ENSGALG00000029576,ENSGALG00000014155,ENSGALG00000003475,ENSGALG00000013165,ENSGALG00000034735,ENSGALG00000013167,ENSGALG00000015961,ENSGALG00000010286,ENSGALG00000008858
GO:0006099	tricarboxylic acid cycle	biological_process	2.82e-05	0.0029333	10	2696	14	14096	ENSGALG00000011950,ENSGALG00000041401,ENSGALG00000001949,ENSGALG00000029576,ENSGALG00000014155,ENSGALG00000013165,ENSGALG00000013167,ENSGALG00000015961,ENSGALG00000008858,ENSGALG00000010286
GO:0030326	embryonic limb morphogenesis	biological_process	2.85e-05	0.0029528	38	2696	105	14096	ENSGALG00000003114,ENSGALG00000035237,ENSGALG00000035725,ENSGALG00000027213,ENSGALG00000009129,ENSGALG00000032584,ENSGALG00000032039,ENSGALG00000031960,ENSGALG00000039238,ENSGALG00000003324,ENSGALG00000001079,ENSGALG00000014873,ENSGALG00000030030,ENSGALG00000009241,ENSGALG00000023195,ENSGALG00000037687,ENSGALG00000016102,ENSGALG00000037203,ENSGALG00000015013,ENSGALG00000009270,ENSGALG00000007668,…
GO:0006084	acetyl-CoA metabolic process	biological_process	2.87e-05	0.0029563	12	2696	19	14096	ENSGALG00000016430,ENSGALG00000011483,ENSGALG00000007931,ENSGALG00000003362,ENSGALG00000029576,ENSGALG00000013235,ENSGALG00000003475,ENSGALG00000007904,ENSGALG00000036853,ENSGALG00000009700,ENSGALG00000016323,ENSGALG00000005043
GO:0072006	nephron development	biological_process	2.95e-05	0.0029875	36	2696	98	14096	ENSGALG00000000839,ENSGALG00000043555,ENSGALG00000017389,ENSGALG00000011117,ENSGALG00000016680,ENSGALG00000011358,ENSGALG00000006379,ENSGALG00000040834,ENSGALG00000009724,ENSGALG00000005554,ENSGALG00000031410,ENSGALG00000014496,ENSGALG00000013085,ENSGALG00000036133,ENSGALG00000013193,ENSGALG00000006802,ENSGALG00000007706,ENSGALG00000042045,ENSGALG00000012644,ENSGALG00000037203,ENSGALG00000007668,…
GO:0006796	phosphate-containing compound metabolic process	biological_process	3.18e-05	0.0031993	439	2696	1957	14096	ENSGALG00000013085,ENSGALG00000012845,ENSGALG00000003855,ENSGALG00000015708,ENSGALG00000005088,ENSGALG00000034960,ENSGALG00000035052,ENSGALG00000006608,ENSGALG00000011618,ENSGALG00000010049,ENSGALG00000035525,ENSGALG00000007226,ENSGALG00000003126,ENSGALG00000007815,ENSGALG00000007732,ENSGALG00000004741,ENSGALG00000032544,ENSGALG00000015203,ENSGALG00000005789,ENSGALG00000032618,ENSGALG00000037880,…
GO:0030282	bone mineralization	biological_process	3.22e-05	0.0032255	28	2696	69	14096	ENSGALG00000040834,ENSGALG00000009724,ENSGALG00000010928,ENSGALG00000003137,ENSGALG00000041640,ENSGALG00000016564,ENSGALG00000004386,ENSGALG00000040035,ENSGALG00000029301,ENSGALG00000000839,ENSGALG00000007668,ENSGALG00000004893,ENSGALG00000008601,ENSGALG00000005476,ENSGALG00000014873,ENSGALG00000039322,ENSGALG00000038768,ENSGALG00000030030,ENSGALG00000043185,ENSGALG00000012775,ENSGALG00000014686,…
GO:0060306	regulation of membrane repolarization	biological_process	3.31e-05	0.0032925	12	2696	19	14096	ENSGALG00000004376,ENSGALG00000008351,ENSGALG00000034895,ENSGALG00000009995,ENSGALG00000029694,ENSGALG00000015018,ENSGALG00000037138,ENSGALG00000043287,ENSGALG00000007409,ENSGALG00000014873,ENSGALG00000008486,ENSGALG00000005332
GO:0048736	appendage development	biological_process	3.52e-05	0.0034837	49	2696	148	14096	ENSGALG00000003324,ENSGALG00000039238,ENSGALG00000036082,ENSGALG00000014873,ENSGALG00000042657,ENSGALG00000001079,ENSGALG00000009241,ENSGALG00000030030,ENSGALG00000003114,ENSGALG00000035237,ENSGALG00000009129,ENSGALG00000027213,ENSGALG00000035725,ENSGALG00000031960,ENSGALG00000032584,ENSGALG00000032039,ENSGALG00000009274,ENSGALG00000004386,ENSGALG00000037687,ENSGALG00000023195,ENSGALG00000000902,…
GO:0031214	biomineral tissue development	biological_process	3.69e-05	0.0036285	29	2696	73	14096	ENSGALG00000043185,ENSGALG00000012775,ENSGALG00000014686,ENSGALG00000004239,ENSGALG00000001729,ENSGALG00000016375,ENSGALG00000003770,ENSGALG00000017183,ENSGALG00000039200,ENSGALG00000026080,ENSGALG00000004893,ENSGALG00000008601,ENSGALG00000005476,ENSGALG00000039322,ENSGALG00000038768,ENSGALG00000014873,ENSGALG00000030030,ENSGALG00000040035,ENSGALG00000010927,ENSGALG00000029301,ENSGALG00000000839,…
GO:0050793	regulation of developmental process	biological_process	3.86e-05	0.0037561	314	2696	1355	14096	ENSGALG00000024449,ENSGALG00000042045,ENSGALG00000042604,ENSGALG00000006216,ENSGALG00000004249,ENSGALG00000014496,ENSGALG00000016889,ENSGALG00000039209,ENSGALG00000016564,ENSGALG00000041640,ENSGALG00000015768,ENSGALG00000002515,ENSGALG00000009415,ENSGALG00000008177,ENSGALG00000031890,ENSGALG00000015910,ENSGALG00000042351,ENSGALG00000027069,ENSGALG00000000769,ENSGALG00000040256,ENSGALG00000001079,…
GO:0051239	regulation of multicellular organismal process	biological_process	3.99e-05	0.0038671	349	2696	1524	14096	ENSGALG00000001076,ENSGALG00000015094,ENSGALG00000013822,ENSGALG00000034616,ENSGALG00000001416,ENSGALG00000011657,ENSGALG00000041555,ENSGALG00000010133,ENSGALG00000012735,ENSGALG00000039583,ENSGALG00000002845,ENSGALG00000003767,ENSGALG00000004274,ENSGALG00000015142,ENSGALG00000012710,ENSGALG00000027583,ENSGALG00000006273,ENSGALG00000026525,ENSGALG00000015425,ENSGALG00000016034,ENSGALG00000007114,…
GO:0035108	limb morphogenesis	biological_process	4.37e-05	0.0041838	42	2696	122	14096	ENSGALG00000003114,ENSGALG00000035237,ENSGALG00000009129,ENSGALG00000027213,ENSGALG00000035725,ENSGALG00000031960,ENSGALG00000032584,ENSGALG00000032039,ENSGALG00000003324,ENSGALG00000039238,ENSGALG00000014873,ENSGALG00000001079,ENSGALG00000042657,ENSGALG00000030030,ENSGALG00000009241,ENSGALG00000037687,ENSGALG00000023195,ENSGALG00000015013,ENSGALG00000037203,ENSGALG00000016102,ENSGALG00000007668,…
GO:0015992	proton transport	biological_process	4.47e-05	0.0042417	38	2696	106	14096	ENSGALG00000004498,ENSGALG00000037880,ENSGALG00000009286,ENSGALG00000041091,ENSGALG00000014121,ENSGALG00000041640,ENSGALG00000006753,ENSGALG00000035334,ENSGALG00000032079,ENSGALG00000017380,ENSGALG00000015751,ENSGALG00000037996,ENSGALG00000005749,ENSGALG00000006899,ENSGALG00000003256,ENSGALG00000007863,ENSGALG00000035996,Novel00250,ENSGALG00000016791,ENSGALG00000008066,ENSGALG00000001330,ENSGALG0…
GO:0050673	epithelial cell proliferation	biological_process	5e-05	0.004654	62	2696	202	14096	ENSGALG00000020067,ENSGALG00000006379,ENSGALG00000038355,ENSGALG00000040834,ENSGALG00000002298,ENSGALG00000003374,ENSGALG00000015910,ENSGALG00000010290,ENSGALG00000030879,ENSGALG00000038364,ENSGALG00000017389,ENSGALG00000037437,ENSGALG00000011657,ENSGALG00000010170,ENSGALG00000011099,ENSGALG00000007681,ENSGALG00000010745,ENSGALG00000033090,ENSGALG00000028069,ENSGALG00000043287,ENSGALG00000008514,…
GO:0001501	skeletal system development	biological_process	5.01e-05	0.004654	96	2696	346	14096	ENSGALG00000039200,ENSGALG00000032039,ENSGALG00000001141,ENSGALG00000003114,ENSGALG00000009129,ENSGALG00000028091,ENSGALG00000027213,ENSGALG00000017295,ENSGALG00000009948,ENSGALG00000009241,ENSGALG00000003324,ENSGALG00000004893,ENSGALG00000038768,ENSGALG00000015627,ENSGALG00000015013,ENSGALG00000016102,ENSGALG00000037203,ENSGALG00000030377,ENSGALG00000037619,ENSGALG00000039040,ENSGALG00000017334,…
GO:0065008	regulation of biological quality	biological_process	5.37e-05	0.0049574	443	2696	1987	14096	ENSGALG00000027420,ENSGALG00000000498,ENSGALG00000007899,ENSGALG00000008206,ENSGALG00000012790,ENSGALG00000012644,ENSGALG00000004980,ENSGALG00000007485,ENSGALG00000004386,ENSGALG00000009739,ENSGALG00000017185,ENSGALG00000029261,ENSGALG00000018946,ENSGALG00000013086,ENSGALG00000004526,ENSGALG00000039200,ENSGALG00000031960,ENSGALG00000011897,ENSGALG00000031284,ENSGALG00000004003,ENSGALG00000041878,…
GO:0045667	regulation of osteoblast differentiation	biological_process	6.09e-05	0.0055444	31	2696	82	14096	ENSGALG00000006379,ENSGALG00000033351,ENSGALG00000005985,ENSGALG00000041640,ENSGALG00000005981,ENSGALG00000004274,ENSGALG00000010697,ENSGALG00000029301,ENSGALG00000040180,ENSGALG00000007668,ENSGALG00000040276,ENSGALG00000043555,ENSGALG00000009415,ENSGALG00000011347,ENSGALG00000037203,ENSGALG00000039322,ENSGALG00000014873,ENSGALG00000038768,ENSGALG00000004893,ENSGALG00000003473,ENSGALG00000009241,…
GO:0050807	regulation of synapse organization	biological_process	6.23e-05	0.0056274	28	2696	72	14096	ENSGALG00000008281,ENSGALG00000007242,ENSGALG00000009739,ENSGALG00000040938,ENSGALG00000016941,ENSGALG00000015967,ENSGALG00000000367,ENSGALG00000015593,ENSGALG00000017389,ENSGALG00000008537,ENSGALG00000011319,ENSGALG00000015132,ENSGALG00000002864,ENSGALG00000037387,ENSGALG00000006796,ENSGALG00000002707,ENSGALG00000004741,ENSGALG00000035099,ENSGALG00000043209,ENSGALG00000027355,ENSGALG00000026214,…
GO:0060173	limb development	biological_process	6.25e-05	0.0056274	48	2696	147	14096	ENSGALG00000004386,ENSGALG00000009274,ENSGALG00000007668,ENSGALG00000009270,ENSGALG00000003647,ENSGALG00000015013,ENSGALG00000000902,ENSGALG00000016102,ENSGALG00000037203,ENSGALG00000037687,ENSGALG00000023195,ENSGALG00000030030,ENSGALG00000009241,ENSGALG00000014873,ENSGALG00000001079,ENSGALG00000042657,ENSGALG00000003324,ENSGALG00000039238,ENSGALG00000036082,ENSGALG00000031960,ENSGALG00000032039,…
GO:0060346	bone trabecula formation	biological_process	6.29e-05	0.0056342	7	2696	8	14096	ENSGALG00000019761,ENSGALG00000041555,ENSGALG00000003473,ENSGALG00000043389,ENSGALG00000038848,ENSGALG00000014686,ENSGALG00000009724
GO:0061061	muscle structure development	biological_process	6.48e-05	0.0057811	98	2696	357	14096	ENSGALG00000016102,ENSGALG00000008351,ENSGALG00000037203,ENSGALG00000015013,ENSGALG00000012790,ENSGALG00000012712,ENSGALG00000010936,ENSGALG00000007899,ENSGALG00000033295,ENSGALG00000026858,ENSGALG00000029301,ENSGALG00000008864,ENSGALG00000004386,ENSGALG00000011086,ENSGALG00000005519,ENSGALG00000031960,ENSGALG00000025751,ENSGALG00000008805,ENSGALG00000030643,ENSGALG00000003114,ENSGALG00000028091,…
GO:0060047	heart contraction	biological_process	6.63e-05	0.0058821	39	2696	112	14096	ENSGALG00000015018,ENSGALG00000043287,ENSGALG00000016281,ENSGALG00000034716,ENSGALG00000000949,ENSGALG00000003886,ENSGALG00000042744,ENSGALG00000015233,ENSGALG00000015142,ENSGALG00000014848,ENSGALG00000027583,ENSGALG00000002845,ENSGALG00000008486,ENSGALG00000012735,ENSGALG00000005332,ENSGALG00000015410,ENSGALG00000001416,ENSGALG00000008177,ENSGALG00000011117,ENSGALG00000034895,ENSGALG00000008456,…
GO:0019395	fatty acid oxidation	biological_process	6.66e-05	0.0058821	24	2696	58	14096	ENSGALG00000021972,ENSGALG00000042851,ENSGALG00000016536,ENSGALG00000024271,ENSGALG00000007072,ENSGALG00000026287,ENSGALG00000013535,ENSGALG00000008040,ENSGALG00000041640,ENSGALG00000005043,ENSGALG00000031563,ENSGALG00000041470,ENSGALG00000002925,ENSGALG00000002891,ENSGALG00000005554,ENSGALG00000037603,ENSGALG00000001557,ENSGALG00000036990,ENSGALG00000042554,ENSGALG00000009442,ENSGALG00000005034,…
GO:0007517	muscle organ development	biological_process	7.75e-05	0.0068101	64	2696	213	14096	ENSGALG00000033295,ENSGALG00000026858,ENSGALG00000029301,ENSGALG00000015013,ENSGALG00000012790,ENSGALG00000016102,ENSGALG00000037203,ENSGALG00000007899,ENSGALG00000010936,ENSGALG00000011086,ENSGALG00000005519,ENSGALG00000008864,ENSGALG00000003114,ENSGALG00000030643,ENSGALG00000001006,ENSGALG00000028091,ENSGALG00000031960,ENSGALG00000011291,ENSGALG00000014873,ENSGALG00000043727,ENSGALG00000017389,…
GO:0051965	positive regulation of synapse assembly	biological_process	7.81e-05	0.0068253	20	2696	45	14096	ENSGALG00000008716,ENSGALG00000033960,ENSGALG00000005123,ENSGALG00000028682,ENSGALG00000019019,ENSGALG00000026214,ENSGALG00000043209,ENSGALG00000027355,ENSGALG00000035099,ENSGALG00000004741,ENSGALG00000006796,ENSGALG00000002864,ENSGALG00000037387,ENSGALG00000008537,ENSGALG00000011319,ENSGALG00000000367,ENSGALG00000040938,ENSGALG00000015967,ENSGALG00000009739,ENSGALG00000007242
GO:0019637	organophosphate metabolic process	biological_process	7.89e-05	0.0068652	156	2696	619	14096	Novel00671,ENSGALG00000008098,ENSGALG00000032746,ENSGALG00000041787,ENSGALG00000015854,ENSGALG00000015117,ENSGALG00000007931,ENSGALG00000003821,ENSGALG00000008855,ENSGALG00000037593,ENSGALG00000040035,ENSGALG00000023517,ENSGALG00000036106,ENSGALG00000002082,ENSGALG00000001330,ENSGALG00000032142,ENSGALG00000011227,ENSGALG00000012715,ENSGALG00000002023,ENSGALG00000026776,ENSGALG00000001207,ENSGALG0…
GO:0009127	purine nucleoside monophosphate biosynthetic process	biological_process	8.31e-05	0.0071738	24	2696	58	14096	ENSGALG00000006098,ENSGALG00000041091,ENSGALG00000009286,ENSGALG00000037880,ENSGALG00000002082,ENSGALG00000029150,ENSGALG00000042851,ENSGALG00000001330,ENSGALG00000015751,ENSGALG00000001452,ENSGALG00000006753,ENSGALG00000005002,ENSGALG00000015372,Novel01930,ENSGALG00000005961,ENSGALG00000006899,ENSGALG00000007926,ENSGALG00000011618,Novel01063,ENSGALG00000032465,ENSGALG00000038801,ENSGALG000000110…
GO:0003015	heart process	biological_process	8.33e-05	0.0071738	39	2696	113	14096	ENSGALG00000004376,ENSGALG00000014873,ENSGALG00000017122,ENSGALG00000003521,ENSGALG00000000585,ENSGALG00000021272,ENSGALG00000037138,ENSGALG00000004096,ENSGALG00000003163,ENSGALG00000000498,ENSGALG00000012790,ENSGALG00000008351,ENSGALG00000003588,ENSGALG00000029694,ENSGALG00000010005,ENSGALG00000006560,ENSGALG00000007409,ENSGALG00000011481,ENSGALG00000042744,ENSGALG00000034716,ENSGALG00000000949,…
GO:0061333	renal tubule morphogenesis	biological_process	8.67e-05	0.0073678	25	2696	62	14096	ENSGALG00000036798,ENSGALG00000037203,ENSGALG00000000839,ENSGALG00000012644,ENSGALG00000043555,ENSGALG00000017389,ENSGALG00000011117,ENSGALG00000029270,ENSGALG00000017334,ENSGALG00000029301,ENSGALG00000010163,ENSGALG00000004386,ENSGALG00000011358,ENSGALG00000006379,ENSGALG00000040834,ENSGALG00000010664,ENSGALG00000009724,ENSGALG00000001097,ENSGALG00000031255,ENSGALG00000001141,ENSGALG00000003114,…
GO:0072028	nephron morphogenesis	biological_process	8.88e-05	0.0075101	25	2696	62	14096	ENSGALG00000006379,ENSGALG00000010664,ENSGALG00000040834,ENSGALG00000009724,ENSGALG00000001097,ENSGALG00000004386,ENSGALG00000011358,ENSGALG00000011117,ENSGALG00000017334,ENSGALG00000029270,ENSGALG00000029301,ENSGALG00000037203,ENSGALG00000000839,ENSGALG00000012644,ENSGALG00000007668,ENSGALG00000017389,ENSGALG00000043555,ENSGALG00000007706,ENSGALG00000039238,ENSGALG00000042045,ENSGALG00000013193,…
GO:0030239	myofibril assembly	biological_process	9.22e-05	0.0077602	19	2696	42	14096	ENSGALG00000015018,ENSGALG00000003521,ENSGALG00000002125,ENSGALG00000028721,ENSGALG00000009050,ENSGALG00000006491,ENSGALG00000018946,ENSGALG00000008805,ENSGALG00000012735,ENSGALG00000011086,ENSGALG00000038813,ENSGALG00000017389,ENSGALG00000008351,ENSGALG00000001977,ENSGALG00000004334,ENSGALG00000009089,ENSGALG00000019719,ENSGALG00000014463,ENSGALG00000010027
GO:0055001	muscle cell development	biological_process	9.37e-05	0.0078425	35	2696	99	14096	ENSGALG00000006491,ENSGALG00000006216,ENSGALG00000015018,ENSGALG00000024449,ENSGALG00000016281,ENSGALG00000028721,ENSGALG00000003886,ENSGALG00000009050,ENSGALG00000034716,ENSGALG00000017389,ENSGALG00000001977,ENSGALG00000014813,ENSGALG00000019719,ENSGALG00000002958,ENSGALG00000012735,ENSGALG00000038813,ENSGALG00000015410,ENSGALG00000031960,ENSGALG00000014261,ENSGALG00000008805,ENSGALG00000018946,…
GO:0044711	single-organism biosynthetic process	biological_process	9.5e-05	0.0078652	222	2696	928	14096	ENSGALG00000006431,ENSGALG00000041401,ENSGALG00000001862,ENSGALG00000008177,ENSGALG00000040896,ENSGALG00000014442,ENSGALG00000029596,ENSGALG00000008538,ENSGALG00000026285,ENSGALG00000039572,ENSGALG00000041091,ENSGALG00000000913,ENSGALG00000038110,ENSGALG00000016564,ENSGALG00000005002,ENSGALG00000001375,ENSGALG00000016444,ENSGALG00000030251,ENSGALG00000016294,Novel02883,ENSGALG00000007904,ENSGALG0…
GO:0009124	nucleoside monophosphate biosynthetic process	biological_process	9.52e-05	0.0078652	27	2696	69	14096	ENSGALG00000006040,ENSGALG00000001452,ENSGALG00000015751,ENSGALG00000000802,ENSGALG00000005002,ENSGALG00000015372,ENSGALG00000014897,ENSGALG00000006753,ENSGALG00000037880,ENSGALG00000009286,ENSGALG00000041091,ENSGALG00000006098,ENSGALG00000002082,ENSGALG00000029150,ENSGALG00000042851,ENSGALG00000001330,ENSGALG00000014447,ENSGALG00000038801,ENSGALG00000011035,ENSGALG00000002388,ENSGALG00000005961,…
GO:0051216	cartilage development	biological_process	9.52e-05	0.0078652	44	2696	133	14096	ENSGALG00000005476,ENSGALG00000007706,ENSGALG00000003770,ENSGALG00000030607,ENSGALG00000038540,ENSGALG00000015015,ENSGALG00000038848,ENSGALG00000029000,ENSGALG00000005123,ENSGALG00000006958,ENSGALG00000017183,ENSGALG00000010125,ENSGALG00000009724,ENSGALG00000038355,ENSGALG00000006379,ENSGALG00000011740,ENSGALG00000012735,ENSGALG00000038364,ENSGALG00000015132,ENSGALG00000040276,ENSGALG00000041555,…
GO:0000904	cell morphogenesis involved in differentiation	biological_process	0.0001011	0.0082734	131	2696	511	14096	ENSGALG00000010857,ENSGALG00000012462,ENSGALG00000031862,ENSGALG00000019019,ENSGALG00000008733,ENSGALG00000010974,ENSGALG00000014999,ENSGALG00000001079,ENSGALG00000031122,ENSGALG00000004097,ENSGALG00000015511,ENSGALG00000007807,ENSGALG00000039985,ENSGALG00000000059,ENSGALG00000003135,ENSGALG00000015519,ENSGALG00000030603,ENSGALG00000007242,ENSGALG00000029788,ENSGALG00000026276,ENSGALG00000006563,…
GO:0051963	regulation of synapse assembly	biological_process	0.00010516	0.0085663	23	2696	56	14096	ENSGALG00000026214,ENSGALG00000019019,ENSGALG00000005123,ENSGALG00000028682,ENSGALG00000008716,ENSGALG00000033960,ENSGALG00000006796,ENSGALG00000002707,ENSGALG00000035099,ENSGALG00000004741,ENSGALG00000043209,ENSGALG00000027355,ENSGALG00000000367,ENSGALG00000015593,ENSGALG00000017389,ENSGALG00000008537,ENSGALG00000011319,ENSGALG00000002864,ENSGALG00000037387,ENSGALG00000007242,ENSGALG00000009739,…
GO:0070469	respiratory chain	cellular_component	1.61e-31	2.89e-27	55	2696	62	14096	ENSGALG00000025999,ENSGALG00000042242,ENSGALG00000035223,ENSGALG00000032456,ENSGALG00000013191,ENSGALG00000009703,ENSGALG00000037838,ENSGALG00000027688,ENSGALG00000032142,ENSGALG00000005465,ENSGALG00000000629,ENSGALG00000036625,ENSGALG00000011020,ENSGALG00000042809,ENSGALG00000028537,ENSGALG00000022813,ENSGALG00000029172,ENSGALG00000043768,ENSGALG00000008606,ENSGALG00000011325,ENSGALG00000025819,…
GO:0098803	respiratory chain complex	cellular_component	9.84e-28	8.81e-24	48	2696	54	14096	ENSGALG00000030436,ENSGALG00000006073,ENSGALG00000041401,ENSGALG00000008084,ENSGALG00000029500,ENSGALG00000032079,ENSGALG00000035334,ENSGALG00000002490,ENSGALG00000014121,ENSGALG00000002033,ENSGALG00000021692,ENSGALG00000008239,ENSGALG00000008613,ENSGALG00000040987,ENSGALG00000042750,ENSGALG00000017282,ENSGALG00000041418,ENSGALG00000005704,ENSGALG00000005749,ENSGALG00000040626,ENSGALG00000009076,…
GO:0005743	mitochondrial inner membrane	cellular_component	6.28e-27	3.75e-23	122	2696	246	14096	ENSGALG00000001184,ENSGALG00000005363,ENSGALG00000014869,ENSGALG00000028345,ENSGALG00000007926,ENSGALG00000011325,ENSGALG00000032875,ENSGALG00000039212,ENSGALG00000008795,ENSGALG00000002321,ENSGALG00000026847,ENSGALG00000009700,ENSGALG00000008606,ENSGALG00000007289,ENSGALG00000028537,ENSGALG00000006503,ENSGALG00000022813,ENSGALG00000011897,ENSGALG00000038952,ENSGALG00000001330,ENSGALG00000032142,…
GO:0098800	inner mitochondrial membrane protein complex	cellular_component	1.06e-26	4.16e-23	65	2696	91	14096	ENSGALG00000032595,ENSGALG00000013709,ENSGALG00000028026,ENSGALG00000009076,ENSGALG00000008821,ENSGALG00000005704,ENSGALG00000006899,ENSGALG00000006489,ENSGALG00000006753,ENSGALG00000008239,ENSGALG00000021692,ENSGALG00000040987,ENSGALG00000029500,ENSGALG00000015751,ENSGALG00000006073,ENSGALG00000030436,ENSGALG00000033001,ENSGALG00000008606,ENSGALG00000026847,ENSGALG00000011897,ENSGALG00000022813,…
GO:0098798	mitochondrial protein complex	cellular_component	1.16e-26	4.16e-23	76	2696	118	14096	ENSGALG00000042809,ENSGALG00000036625,ENSGALG00000000629,ENSGALG00000013235,ENSGALG00000004037,ENSGALG00000027688,ENSGALG00000009703,ENSGALG00000015783,ENSGALG00000042242,ENSGALG00000025999,ENSGALG00000001452,ENSGALG00000004302,ENSGALG00000038672,ENSGALG00000032465,ENSGALG00000007205,Novel01647,ENSGALG00000008785,ENSGALG00000043768,ENSGALG00000004355,ENSGALG00000038801,ENSGALG00000008084,ENSGALG0…
GO:0005746	mitochondrial respiratory chain	cellular_component	1.21e-25	3.61e-22	46	2696	53	14096	ENSGALG00000006073,ENSGALG00000041401,ENSGALG00000008084,ENSGALG00000030436,ENSGALG00000014121,ENSGALG00000002033,ENSGALG00000021692,ENSGALG00000008239,ENSGALG00000042750,ENSGALG00000008613,ENSGALG00000040987,ENSGALG00000029500,ENSGALG00000002490,ENSGALG00000041418,ENSGALG00000005704,ENSGALG00000005749,ENSGALG00000037996,ENSGALG00000017282,ENSGALG00000005789,ENSGALG00000032595,ENSGALG00000008066,…
GO:1990204	oxidoreductase complex	cellular_component	5.86e-25	1.5e-21	56	2696	75	14096	ENSGALG00000004302,ENSGALG00000007931,ENSGALG00000014155,Novel01647,ENSGALG00000011325,ENSGALG00000008606,ENSGALG00000043768,ENSGALG00000010286,ENSGALG00000022813,ENSGALG00000028537,ENSGALG00000000629,ENSGALG00000005465,ENSGALG00000036625,ENSGALG00000042809,ENSGALG00000013235,ENSGALG00000027688,ENSGALG00000009703,ENSGALG00000035223,ENSGALG00000011481,ENSGALG00000013191,ENSGALG00000042242,ENSGALG0…
GO:0019866	organelle inner membrane	cellular_component	1.73e-23	3.86e-20	125	2696	274	14096	ENSGALG00000042242,ENSGALG00000001452,ENSGALG00000025999,ENSGALG00000015783,ENSGALG00000027688,ENSGALG00000009703,ENSGALG00000000629,ENSGALG00000036625,ENSGALG00000001949,ENSGALG00000042809,ENSGALG00000038801,ENSGALG00000004355,ENSGALG00000029172,ENSGALG00000028302,ENSGALG00000013167,ENSGALG00000008593,ENSGALG00000008785,ENSGALG00000016555,ENSGALG00000043768,ENSGALG00000025819,ENSGALG00000014692,…
GO:0005740	mitochondrial envelope	cellular_component	3.92e-22	7.17e-19	147	2696	357	14096	ENSGALG00000006503,ENSGALG00000022813,ENSGALG00000026847,ENSGALG00000002321,Novel01013,ENSGALG00000034500,ENSGALG00000032875,ENSGALG00000011325,ENSGALG00000013191,ENSGALG00000011514,ENSGALG00000032456,ENSGALG00000015372,ENSGALG00000015343,ENSGALG00000026776,ENSGALG00000015437,ENSGALG00000037593,ENSGALG00000001330,ENSGALG00000032142,ENSGALG00000005465,ENSGALG00000005005,ENSGALG00000014981,ENSGALG0…
GO:0031966	mitochondrial membrane	cellular_component	4e-22	7.17e-19	140	2696	333	14096	ENSGALG00000009703,ENSGALG00000042809,ENSGALG00000001949,ENSGALG00000036625,ENSGALG00000000629,ENSGALG00000042242,ENSGALG00000015783,ENSGALG00000028302,ENSGALG00000008785,ENSGALG00000043768,ENSGALG00000016555,ENSGALG00000041091,ENSGALG00000008084,ENSGALG00000041401,ENSGALG00000010614,ENSGALG00000032079,ENSGALG00000031099,ENSGALG00000034735,ENSGALG00000002033,ENSGALG00000017163,ENSGALG00000001375,…
GO:0005747	mitochondrial respiratory chain complex I	cellular_component	1.16e-20	1.6e-17	36	2696	41	14096	ENSGALG00000011325,Novel01647,ENSGALG00000004302,ENSGALG00000028537,ENSGALG00000022813,ENSGALG00000043768,ENSGALG00000008606,ENSGALG00000009703,ENSGALG00000027688,ENSGALG00000042809,ENSGALG00000000629,ENSGALG00000036625,ENSGALG00000005465,ENSGALG00000025999,ENSGALG00000042242,ENSGALG00000013191,ENSGALG00000035223,ENSGALG00000017282,ENSGALG00000041418,ENSGALG00000005704,ENSGALG00000008821,ENSGALG0…
GO:0030964	NADH dehydrogenase complex	cellular_component	1.16e-20	1.6e-17	36	2696	41	14096	ENSGALG00000030436,ENSGALG00000006073,ENSGALG00000008084,ENSGALG00000029500,ENSGALG00000002033,ENSGALG00000008239,ENSGALG00000021692,ENSGALG00000040987,ENSGALG00000042750,ENSGALG00000008613,ENSGALG00000017282,ENSGALG00000041418,ENSGALG00000005704,ENSGALG00000040626,ENSGALG00000009076,ENSGALG00000008821,ENSGALG00000032595,ENSGALG00000038714,ENSGALG00000028026,ENSGALG00000027688,ENSGALG00000009703,…
GO:0045271	respiratory chain complex I	cellular_component	1.16e-20	1.6e-17	36	2696	41	14096	Novel01647,ENSGALG00000011325,ENSGALG00000004302,ENSGALG00000022813,ENSGALG00000028537,ENSGALG00000008606,ENSGALG00000043768,ENSGALG00000027688,ENSGALG00000009703,ENSGALG00000042809,ENSGALG00000036625,ENSGALG00000000629,ENSGALG00000005465,ENSGALG00000042242,ENSGALG00000025999,ENSGALG00000013191,ENSGALG00000035223,ENSGALG00000017282,ENSGALG00000041418,ENSGALG00000005704,ENSGALG00000040626,ENSGALG0…
GO:0044455	mitochondrial membrane part	cellular_component	1.78e-20	2.28e-17	76	2696	139	14096	ENSGALG00000034645,ENSGALG00000013191,ENSGALG00000035223,ENSGALG00000015372,ENSGALG00000005465,ENSGALG00000032142,ENSGALG00000037593,ENSGALG00000008606,ENSGALG00000026847,ENSGALG00000022813,ENSGALG00000011897,ENSGALG00000028537,ENSGALG00000007926,Novel01013,ENSGALG00000032875,ENSGALG00000011325,ENSGALG00000006753,ENSGALG00000008239,ENSGALG00000021692,ENSGALG00000040987,ENSGALG00000029500,ENSGALG0…
GO:0044429	mitochondrial part	cellular_component	6.59e-20	7.87e-17	168	2696	450	14096	ENSGALG00000011514,ENSGALG00000032456,ENSGALG00000013191,ENSGALG00000015372,ENSGALG00000015343,ENSGALG00000026776,ENSGALG00000037593,ENSGALG00000015437,ENSGALG00000001330,ENSGALG00000032142,ENSGALG00000005465,ENSGALG00000006503,ENSGALG00000022813,ENSGALG00000004869,ENSGALG00000002321,ENSGALG00000026847,ENSGALG00000030466,Novel01013,ENSGALG00000032875,ENSGALG00000034500,ENSGALG00000011325,ENSGALG0…
GO:0043292	contractile fiber	cellular_component	5.9e-14	5.03e-11	58	2696	117	14096	ENSGALG00000011811,ENSGALG00000038813,ENSGALG00000005332,ENSGALG00000006835,ENSGALG00000016342,ENSGALG00000006591,ENSGALG00000037744,ENSGALG00000014995,ENSGALG00000019719,ENSGALG00000019157,ENSGALG00000013822,ENSGALG00000014813,ENSGALG00000001977,ENSGALG00000026452,ENSGALG00000011306,ENSGALG00000005207,ENSGALG00000000164,ENSGALG00000043555,ENSGALG00000008177,ENSGALG00000030247,ENSGALG00000035845,…
GO:0030016	myofibril	cellular_component	6.27e-14	5.11e-11	56	2696	111	14096	ENSGALG00000011086,ENSGALG00000041202,ENSGALG00000041043,ENSGALG00000008864,ENSGALG00000005493,ENSGALG00000005292,ENSGALG00000011994,ENSGALG00000010027,ENSGALG00000014463,ENSGALG00000008945,ENSGALG00000009089,ENSGALG00000037203,ENSGALG00000008914,ENSGALG00000007048,ENSGALG00000000585,ENSGALG00000003529,ENSGALG00000011278,ENSGALG00000003521,ENSGALG00000001926,ENSGALG00000002125,ENSGALG00000042458,…
GO:0044449	contractile fiber part	cellular_component	1.68e-13	1.31e-10	52	2696	101	14096	ENSGALG00000009089,ENSGALG00000010027,ENSGALG00000011994,ENSGALG00000008945,ENSGALG00000014463,ENSGALG00000007048,ENSGALG00000037203,ENSGALG00000041202,ENSGALG00000011086,ENSGALG00000005493,ENSGALG00000008864,ENSGALG00000005292,ENSGALG00000018946,ENSGALG00000008805,ENSGALG00000006572,ENSGALG00000002125,ENSGALG00000001926,ENSGALG00000042458,ENSGALG00000003529,ENSGALG00000000585,ENSGALG00000011278,…
GO:0005739	mitochondrion	cellular_component	7.4e-13	4.91e-10	310	2696	1130	14096	ENSGALG00000016285,ENSGALG00000033568,ENSGALG00000015847,ENSGALG00000009519,ENSGALG00000006341,ENSGALG00000011661,ENSGALG00000003553,ENSGALG00000002891,ENSGALG00000002490,ENSGALG00000016342,ENSGALG00000014789,ENSGALG00000014121,ENSGALG00000026661,ENSGALG00000003855,ENSGALG00000040702,ENSGALG00000003126,ENSGALG00000016955,ENSGALG00000032544,ENSGALG00000038593,ENSGALG00000005789,ENSGALG00000040084,…
GO:0030017	sarcomere	cellular_component	7.83e-13	5.01e-10	49	2696	95	14096	ENSGALG00000014847,ENSGALG00000031826,ENSGALG00000009433,ENSGALG00000006491,ENSGALG00000030247,ENSGALG00000028721,ENSGALG00000035845,ENSGALG00000035187,ENSGALG00000007945,ENSGALG00000015018,ENSGALG00000016281,ENSGALG00000019157,ENSGALG00000019719,ENSGALG00000001977,ENSGALG00000014813,ENSGALG00000026452,ENSGALG00000013822,ENSGALG00000011306,ENSGALG00000005207,ENSGALG00000000164,ENSGALG00000008177,…
GO:0031967	organelle envelope	cellular_component	2.02e-12	1.21e-09	178	2696	575	14096	ENSGALG00000027688,ENSGALG00000007878,ENSGALG00000009690,ENSGALG00000037838,ENSGALG00000001452,ENSGALG00000025999,ENSGALG00000025819,ENSGALG00000027963,Novel01647,ENSGALG00000007205,ENSGALG00000010476,ENSGALG00000032465,ENSGALG00000004302,ENSGALG00000003595,ENSGALG00000038672,ENSGALG00000038801,ENSGALG00000002705,ENSGALG00000029172,ENSGALG00000042657,ENSGALG00000004355,ENSGALG00000013167,ENSGALG0…
GO:0031975	envelope	cellular_component	4.43e-12	2.48e-09	178	2696	580	14096	ENSGALG00000029261,ENSGALG00000035223,ENSGALG00000034645,ENSGALG00000015706,ENSGALG00000004613,ENSGALG00000031563,ENSGALG00000034434,ENSGALG00000016536,ENSGALG00000009700,ENSGALG00000008606,ENSGALG00000004003,ENSGALG00000028537,ENSGALG00000007289,ENSGALG00000011897,ENSGALG00000038952,ENSGALG00000001184,ENSGALG00000005363,ENSGALG00000014869,ENSGALG00000028345,ENSGALG00000007926,ENSGALG00000008114,…
GO:0005578	proteinaceous extracellular matrix	cellular_component	9.42e-11	3.75e-08	75	2696	195	14096	ENSGALG00000001097,ENSGALG00000011200,ENSGALG00000011269,ENSGALG00000009920,ENSGALG00000031129,ENSGALG00000013081,ENSGALG00000016584,ENSGALG00000038612,ENSGALG00000001916,ENSGALG00000036798,ENSGALG00000015627,ENSGALG00000004538,ENSGALG00000029429,ENSGALG00000003582,ENSGALG00000026836,ENSGALG00000004526,ENSGALG00000007837,ENSGALG00000042388,ENSGALG00000011270,ENSGALG00000017272,ENSGALG00000006379,…
GO:0031674	I band	cellular_component	7.72e-09	2.47e-06	32	2696	62	14096	ENSGALG00000041202,ENSGALG00000005292,ENSGALG00000005493,ENSGALG00000009089,ENSGALG00000010027,ENSGALG00000014463,ENSGALG00000011994,ENSGALG00000008945,ENSGALG00000037203,ENSGALG00000001926,ENSGALG00000042458,ENSGALG00000011278,ENSGALG00000003529,ENSGALG00000011811,ENSGALG00000005332,ENSGALG00000037744,ENSGALG00000014995,ENSGALG00000019719,ENSGALG00000026452,ENSGALG00000001977,ENSGALG00000014813,…
GO:0031012	extracellular matrix	cellular_component	1.16e-08	3.64e-06	105	2696	332	14096	ENSGALG00000010927,Novel02502,ENSGALG00000009415,ENSGALG00000041555,ENSGALG00000014442,ENSGALG00000023909,ENSGALG00000009568,ENSGALG00000015374,ENSGALG00000002298,ENSGALG00000003770,ENSGALG00000014686,ENSGALG00000014965,ENSGALG00000039990,ENSGALG00000016300,ENSGALG00000039219,ENSGALG00000006802,ENSGALG00000001992,ENSGALG00000005180,ENSGALG00000028069,ENSGALG00000017046,ENSGALG00000034119,ENSGALG0…
GO:0016021	integral component of membrane	cellular_component	1.45e-08	4.47e-06	720	2696	3215	14096	ENSGALG00000009948,ENSGALG00000002242,ENSGALG00000011233,ENSGALG00000026154,ENSGALG00000011897,ENSGALG00000008063,ENSGALG00000017085,ENSGALG00000004003,ENSGALG00000041878,Novel01423,ENSGALG00000026768,ENSGALG00000009739,Novel02090,ENSGALG00000029261,ENSGALG00000019030,ENSGALG00000004980,ENSGALG00000000498,ENSGALG00000007899,Novel02743,ENSGALG00000015079,ENSGALG00000011250,ENSGALG00000000630,ENSGA…
GO:0031224	intrinsic component of membrane	cellular_component	1.82e-08	5.4e-06	729	2696	3264	14096	ENSGALG00000016615,ENSGALG00000009705,ENSGALG00000034289,ENSGALG00000023396,ENSGALG00000000226,ENSGALG00000003778,ENSGALG00000007681,ENSGALG00000003212,ENSGALG00000011796,ENSGALG00000043381,ENSGALG00000008365,ENSGALG00000034895,ENSGALG00000012683,ENSGALG00000012219,ENSGALG00000008589,ENSGALG00000040834,ENSGALG00000015218,ENSGALG00000030834,ENSGALG00000010145,ENSGALG00000015117,ENSGALG00000016934,…
GO:0043209	myelin sheath	cellular_component	4.76e-08	1.2e-05	53	2696	136	14096	ENSGALG00000014121,ENSGALG00000006753,ENSGALG00000008858,ENSGALG00000009545,ENSGALG00000015233,ENSGALG00000005002,ENSGALG00000010614,ENSGALG00000007904,ENSGALG00000002490,ENSGALG00000037401,ENSGALG00000008084,ENSGALG00000011661,ENSGALG00000013640,ENSGALG00000005789,ENSGALG00000005843,ENSGALG00000005309,ENSGALG00000008875,ENSGALG00000007945,ENSGALG00000037953,ENSGALG00000001992,ENSGALG00000002988,…
GO:0044425	membrane part	cellular_component	4.87e-08	1.21e-05	867	2696	3976	14096	ENSGALG00000001330,ENSGALG00000013616,ENSGALG00000013081,ENSGALG00000038000,ENSGALG00000015372,ENSGALG00000037206,ENSGALG00000000894,Novel01013,ENSGALG00000030643,ENSGALG00000016934,ENSGALG00000015117,Novel00279,ENSGALG00000004221,ENSGALG00000001028,ENSGALG00000027091,ENSGALG00000030834,ENSGALG00000015218,ENSGALG00000010145,ENSGALG00000006503,ENSGALG00000005102,ENSGALG00000022813,ENSGALG000000371…
GO:0005887	integral component of plasma membrane	cellular_component	7.65e-08	1.83e-05	187	2696	699	14096	ENSGALG00000016261,ENSGALG00000002783,ENSGALG00000002728,ENSGALG00000007646,ENSGALG00000012298,ENSGALG00000011219,ENSGALG00000034516,ENSGALG00000029596,ENSGALG00000004498,ENSGALG00000005822,ENSGALG00000010182,ENSGALG00000000394,ENSGALG00000000251,ENSGALG00000008716,ENSGALG00000010859,ENSGALG00000034621,ENSGALG00000007371,ENSGALG00000014891,ENSGALG00000020002,ENSGALG00000012021,ENSGALG00000000949,…
GO:1902495	transmembrane transporter complex	cellular_component	9.11e-08	2.04e-05	64	2696	179	14096	ENSGALG00000013081,ENSGALG00000004980,ENSGALG00000027415,ENSGALG00000007899,ENSGALG00000034427,ENSGALG00000010943,ENSGALG00000037138,ENSGALG00000041791,ENSGALG00000005801,ENSGALG00000011897,ENSGALG00000011009,ENSGALG00000015233,ENSGALG00000020505,ENSGALG00000010029,ENSGALG00000016565,ENSGALG00000008486,ENSGALG00000010044,ENSGALG00000003472,ENSGALG00000034895,ENSGALG00000009919,ENSGALG00000016707,…
GO:0030018	Z disc	cellular_component	9.64e-08	2.08e-05	28	2696	55	14096	ENSGALG00000041202,ENSGALG00000011811,ENSGALG00000005332,ENSGALG00000014995,ENSGALG00000005493,ENSGALG00000009089,ENSGALG00000019719,ENSGALG00000026452,ENSGALG00000014813,ENSGALG00000001977,ENSGALG00000010027,ENSGALG00000014463,ENSGALG00000011994,ENSGALG00000008945,ENSGALG00000008177,ENSGALG00000005207,ENSGALG00000011306,ENSGALG00000037203,ENSGALG00000042458,ENSGALG00000001926,ENSGALG00000035187,…
GO:0031226	intrinsic component of plasma membrane	cellular_component	1.5e-07	3.06e-05	192	2696	728	14096	ENSGALG00000005476,ENSGALG00000004741,ENSGALG00000007732,ENSGALG00000005672,ENSGALG00000015708,ENSGALG00000006202,ENSGALG00000009698,ENSGALG00000043764,ENSGALG00000008554,ENSGALG00000015410,ENSGALG00000008007,ENSGALG00000004074,ENSGALG00000017091,ENSGALG00000001512,ENSGALG00000029842,ENSGALG00000009759,ENSGALG00000015593,ENSGALG00000009095,ENSGALG00000010949,ENSGALG00000007666,ENSGALG00000001416,…
GO:0070069	cytochrome complex	cellular_component	1.86e-07	3.71e-05	13	2696	16	14096	ENSGALG00000032142,ENSGALG00000005749,ENSGALG00000007205,ENSGALG00000001375,ENSGALG00000007863,ENSGALG00000032456,ENSGALG00000005789,ENSGALG00000014121,ENSGALG00000008066,ENSGALG00000025999,ENSGALG00000035334,ENSGALG00000002490,ENSGALG00000032079
GO:1990351	transporter complex	cellular_component	2.37e-07	4.56e-05	64	2696	183	14096	ENSGALG00000010943,ENSGALG00000034427,ENSGALG00000007899,ENSGALG00000004980,ENSGALG00000027415,ENSGALG00000013081,ENSGALG00000011009,ENSGALG00000011897,ENSGALG00000005801,ENSGALG00000037138,ENSGALG00000041791,ENSGALG00000034895,ENSGALG00000010044,ENSGALG00000003472,ENSGALG00000010029,ENSGALG00000008486,ENSGALG00000016565,ENSGALG00000015233,ENSGALG00000020505,ENSGALG00000009995,ENSGALG00000003123,…
GO:0071944	cell periphery	cellular_component	2.44e-07	4.6e-05	531	2696	2347	14096	ENSGALG00000003472,ENSGALG00000015132,Novel00784,ENSGALG00000022536,ENSGALG00000016438,ENSGALG00000003792,ENSGALG00000010535,ENSGALG00000043287,ENSGALG00000007511,ENSGALG00000009919,Novel00714,ENSGALG00000041094,ENSGALG00000010669,ENSGALG00000037203,ENSGALG00000010943,ENSGALG00000017334,ENSGALG00000034964,ENSGALG00000011861,ENSGALG00000028770,ENSGALG00000013907,ENSGALG00000015846,ENSGALG000000379…
GO:0044420	extracellular matrix component	cellular_component	2.98e-07	5.49e-05	34	2696	77	14096	ENSGALG00000039990,ENSGALG00000010259,ENSGALG00000008980,ENSGALG00000006958,ENSGALG00000003770,ENSGALG00000014686,ENSGALG00000031112,ENSGALG00000006802,ENSGALG00000011271,ENSGALG00000016300,ENSGALG00000016843,ENSGALG00000023909,ENSGALG00000014615,ENSGALG00000010379,ENSGALG00000011406,ENSGALG00000043555,ENSGALG00000041555,ENSGALG00000010927,ENSGALG00000042388,ENSGALG00000004526,ENSGALG00000003582,…
GO:0044459	plasma membrane part	cellular_component	3e-07	5.49e-05	302	2696	1245	14096	ENSGALG00000006106,ENSGALG00000003285,ENSGALG00000008609,ENSGALG00000004376,ENSGALG00000016017,ENSGALG00000008055,ENSGALG00000007409,Novel01595,ENSGALG00000015519,ENSGALG00000011405,ENSGALG00000007777,ENSGALG00000043139,ENSGALG00000004257,ENSGALG00000026395,ENSGALG00000003163,ENSGALG00000014749,ENSGALG00000009405,ENSGALG00000033271,ENSGALG00000007980,ENSGALG00000002707,ENSGALG00000005845,ENSGALG0…
GO:0042383	sarcolemma	cellular_component	4.13e-07	7.11e-05	25	2696	49	14096	ENSGALG00000013244,ENSGALG00000016281,ENSGALG00000003529,ENSGALG00000003886,ENSGALG00000017122,ENSGALG00000016105,ENSGALG00000014988,ENSGALG00000003770,ENSGALG00000003135,ENSGALG00000015233,ENSGALG00000014995,ENSGALG00000037744,ENSGALG00000008486,ENSGALG00000005332,ENSGALG00000015410,ENSGALG00000042388,ENSGALG00000008351,ENSGALG00000011306,ENSGALG00000008177,ENSGALG00000007048,ENSGALG00000014695,…
GO:0005581	collagen trimer	cellular_component	7.41e-07	0.00011964	22	2696	41	14096	ENSGALG00000015970,ENSGALG00000002507,ENSGALG00000005554,ENSGALG00000005253,ENSGALG00000027067,ENSGALG00000002298,ENSGALG00000005628,ENSGALG00000027526,ENSGALG00000009641,ENSGALG00000036798,ENSGALG00000016843,ENSGALG00000041555,ENSGALG00000038612,Novel00662,ENSGALG00000006864,ENSGALG00000011271,ENSGALG00000027232,ENSGALG00000031112,ENSGALG00000027887,ENSGALG00000005180,ENSGALG00000006958,ENSGALG0…
GO:0034703	cation channel complex	cellular_component	7.8e-07	0.00012437	41	2696	103	14096	ENSGALG00000027771,ENSGALG00000004980,ENSGALG00000012142,ENSGALG00000007409,ENSGALG00000010943,ENSGALG00000011005,ENSGALG00000034427,ENSGALG00000005400,ENSGALG00000004355,ENSGALG00000011897,ENSGALG00000041791,ENSGALG00000037138,ENSGALG00000013244,ENSGALG00000021272,ENSGALG00000011009,ENSGALG00000004376,ENSGALG00000008486,ENSGALG00000005332,ENSGALG00000025788,ENSGALG00000010269,ENSGALG00000005822,…
GO:0034702	ion channel complex	cellular_component	7.84e-07	0.00012437	56	2696	158	14096	ENSGALG00000004074,ENSGALG00000037744,ENSGALG00000020505,ENSGALG00000001698,ENSGALG00000005822,ENSGALG00000008486,ENSGALG00000016565,ENSGALG00000025788,ENSGALG00000005332,ENSGALG00000010029,ENSGALG00000010269,ENSGALG00000034516,ENSGALG00000007666,ENSGALG00000003472,ENSGALG00000007623,ENSGALG00000010044,ENSGALG00000001512,ENSGALG00000008456,ENSGALG00000034895,ENSGALG00000007980,ENSGALG00000002707,…
GO:0045259	proton-transporting ATP synthase complex	cellular_component	9.71e-07	0.00015005	17	2696	27	14096	ENSGALG00000038801,Novel01930,ENSGALG00000032875,ENSGALG00000006899,ENSGALG00000007926,ENSGALG00000038672,ENSGALG00000032465,ENSGALG00000015751,ENSGALG00000001452,ENSGALG00000006753,ENSGALG00000034645,ENSGALG00000015372,ENSGALG00000041091,ENSGALG00000009286,ENSGALG00000033001,ENSGALG00000037880,ENSGALG00000001330
GO:0098796	membrane protein complex	cellular_component	1.97e-06	0.00027975	192	2696	744	14096	ENSGALG00000005332,ENSGALG00000025788,ENSGALG00000005822,ENSGALG00000032079,ENSGALG00000008613,ENSGALG00000015390,ENSGALG00000002033,ENSGALG00000037744,ENSGALG00000007416,ENSGALG00000042351,ENSGALG00000008456,ENSGALG00000041091,ENSGALG00000016261,ENSGALG00000034516,ENSGALG00000006431,ENSGALG00000008084,ENSGALG00000041401,Novel03199,ENSGALG00000038714,ENSGALG00000009687,ENSGALG00000016281,ENSGALG0…
GO:0045277	respiratory chain complex IV	cellular_component	2.55e-06	0.00034095	8	2696	8	14096	ENSGALG00000007863,ENSGALG00000032456,ENSGALG00000014121,ENSGALG00000025999,ENSGALG00000035334,ENSGALG00000005749,ENSGALG00000032142,ENSGALG00000007205
GO:0005753	mitochondrial proton-transporting ATP synthase complex	cellular_component	3.63e-06	0.00047433	14	2696	21	14096	ENSGALG00000038672,ENSGALG00000032465,ENSGALG00000007926,ENSGALG00000006899,ENSGALG00000033001,ENSGALG00000032875,Novel01930,ENSGALG00000041091,ENSGALG00000015372,ENSGALG00000006753,ENSGALG00000034645,ENSGALG00000001452,ENSGALG00000015751,ENSGALG00000038801
GO:0005886	plasma membrane	cellular_component	6.49e-06	0.00078027	504	2696	2251	14096	ENSGALG00000029150,ENSGALG00000014646,ENSGALG00000003647,ENSGALG00000007048,ENSGALG00000040367,ENSGALG00000019114,ENSGALG00000037687,ENSGALG00000002028,ENSGALG00000004956,ENSGALG00000028424,ENSGALG00000011481,ENSGALG00000017119,ENSGALG00000010163,ENSGALG00000009495,ENSGALG00000006922,ENSGALG00000009185,ENSGALG00000040504,ENSGALG00000000820,ENSGALG00000017229,ENSGALG00000038787,ENSGALG00000012142,…
GO:0005615	extracellular space	cellular_component	1.03e-05	0.0012184	175	2696	679	14096	ENSGALG00000010338,ENSGALG00000014804,ENSGALG00000024470,ENSGALG00000017179,ENSGALG00000016293,ENSGALG00000009641,ENSGALG00000010027,ENSGALG00000002028,ENSGALG00000037837,ENSGALG00000017046,ENSGALG00000014233,ENSGALG00000007668,Novel01639,ENSGALG00000042657,ENSGALG00000042458,ENSGALG00000011355,ENSGALG00000040672,ENSGALG00000008676,ENSGALG00000003473,ENSGALG00000006598,ENSGALG00000028041,ENSGALG0…
GO:0016529	sarcoplasmic reticulum	cellular_component	1.12e-05	0.0013079	14	2696	23	14096	ENSGALG00000008486,ENSGALG00000035845,ENSGALG00000039712,ENSGALG00000038813,ENSGALG00000014804,ENSGALG00000011811,ENSGALG00000034458,ENSGALG00000027583,ENSGALG00000014848,ENSGALG00000015018,ENSGALG00000017168,ENSGALG00000009995,ENSGALG00000008701,ENSGALG00000008177
GO:0014704	intercalated disc	cellular_component	1.26e-05	0.0014576	15	2696	26	14096	ENSGALG00000034895,ENSGALG00000037203,ENSGALG00000002198,ENSGALG00000012790,ENSGALG00000011306,ENSGALG00000008914,ENSGALG00000015132,ENSGALG00000002845,ENSGALG00000014873,ENSGALG00000042458,ENSGALG00000007409,ENSGALG00000003135,ENSGALG00000015142,ENSGALG00000015233,ENSGALG00000014995
GO:0016528	sarcoplasm	cellular_component	1.35e-05	0.001544	15	2696	26	14096	ENSGALG00000014848,ENSGALG00000015018,ENSGALG00000034458,ENSGALG00000027583,ENSGALG00000035845,ENSGALG00000039712,ENSGALG00000008486,ENSGALG00000014804,ENSGALG00000038813,ENSGALG00000011811,ENSGALG00000006258,ENSGALG00000008177,ENSGALG00000008701,ENSGALG00000017168,ENSGALG00000009995
GO:0098797	plasma membrane protein complex	cellular_component	3.79e-05	0.0037094	84	2696	293	14096	ENSGALG00000034109,ENSGALG00000038087,ENSGALG00000003163,ENSGALG00000011005,ENSGALG00000013968,ENSGALG00000008747,ENSGALG00000009405,ENSGALG00000027629,ENSGALG00000007409,ENSGALG00000028424,ENSGALG00000012142,ENSGALG00000027771,ENSGALG00000004376,ENSGALG00000022720,ENSGALG00000011113,ENSGALG00000032702,ENSGALG00000013244,ENSGALG00000021272,ENSGALG00000005400,ENSGALG00000008593,ENSGALG00000017122,…
GO:0031672	A band	cellular_component	4.28e-05	0.0041249	11	2696	17	14096	ENSGALG00000008805,ENSGALG00000014847,ENSGALG00000009089,ENSGALG00000018946,ENSGALG00000019157,ENSGALG00000000164,ENSGALG00000016342,ENSGALG00000000585,ENSGALG00000011278,ENSGALG00000038813,ENSGALG00000005292
GO:0045254	pyruvate dehydrogenase complex	cellular_component	4.4e-05	0.0041987	6	2696	6	14096	ENSGALG00000007904,ENSGALG00000036853,ENSGALG00000007931,ENSGALG00000033753,ENSGALG00000029576,ENSGALG00000013235
GO:0005916	fascia adherens	cellular_component	5.48e-05	0.0050334	7	2696	8	14096	ENSGALG00000042458,ENSGALG00000014873,ENSGALG00000002845,ENSGALG00000008914,ENSGALG00000015132,ENSGALG00000037203,ENSGALG00000011306
GO:0000775	chromosome, centromeric region	cellular_component	5.52e-05	0.0050447	40	2696	116	14096	ENSGALG00000012387,ENSGALG00000013494,ENSGALG00000031524,ENSGALG00000004687,ENSGALG00000009722,ENSGALG00000007768,ENSGALG00000037735,ENSGALG00000012160,ENSGALG00000006110,ENSGALG00000005038,ENSGALG00000011914,ENSGALG00000017128,ENSGALG00000014788,ENSGALG00000009854,ENSGALG00000004515,ENSGALG00000036856,Novel01187,Novel01064,ENSGALG00000024481,ENSGALG00000005451,ENSGALG00000013086,ENSGALG000000016…
GO:0009055	electron carrier activity	molecular_function	4.02e-13	2.88e-10	42	2696	73	14096	ENSGALG00000007205,Novel02080,ENSGALG00000020876,ENSGALG00000027963,Novel01013,ENSGALG00000011325,Novel01287,ENSGALG00000008606,ENSGALG00000008701,ENSGALG00000011020,ENSGALG00000032142,ENSGALG00000035144,ENSGALG00000025999,ENSGALG00000002925,ENSGALG00000008040,Novel01877,Novel01601,ENSGALG00000032456,ENSGALG00000009442,ENSGALG00000001557,ENSGALG00000005749,ENSGALG00000037996,Novel00422,Novel01712…
GO:0003954	NADH dehydrogenase activity	molecular_function	4.64e-12	2.52e-09	25	2696	33	14096	ENSGALG00000042750,ENSGALG00000040987,ENSGALG00000025999,ENSGALG00000029500,ENSGALG00000036229,ENSGALG00000042809,ENSGALG00000000629,ENSGALG00000008084,ENSGALG00000036625,ENSGALG00000037838,ENSGALG00000009703,ENSGALG00000027688,ENSGALG00000030436,ENSGALG00000043768,ENSGALG00000028026,ENSGALG00000008606,ENSGALG00000008821,ENSGALG00000028537,ENSGALG00000029172,ENSGALG00000004302,ENSGALG00000041418,…
GO:0016491	oxidoreductase activity	molecular_function	1.61e-11	8e-09	181	2696	603	14096	ENSGALG00000016261,Novel00898,ENSGALG00000028858,ENSGALG00000008177,ENSGALG00000041401,ENSGALG00000008084,ENSGALG00000014442,ENSGALG00000008105,ENSGALG00000028032,ENSGALG00000040896,ENSGALG00000032079,ENSGALG00000007904,ENSGALG00000034735,ENSGALG00000014673,ENSGALG00000001375,ENSGALG00000001557,ENSGALG00000017282,ENSGALG00000035108,ENSGALG00000010633,ENSGALG00000005749,ENSGALG00000006861,Novel017…
GO:0005509	calcium ion binding	molecular_function	6.49e-11	2.84e-08	136	2696	428	14096	ENSGALG00000015018,ENSGALG00000010960,ENSGALG00000021542,ENSGALG00000034621,ENSGALG00000011136,ENSGALG00000002958,ENSGALG00000009601,ENSGALG00000008326,Novel01389,ENSGALG00000009415,ENSGALG00000039572,ENSGALG00000010692,ENSGALG00000004840,ENSGALG00000006725,ENSGALG00000003285,ENSGALG00000008905,ENSGALG00000016986,ENSGALG00000015624,ENSGALG00000007419,ENSGALG00000031373,ENSGALG00000006217,ENSGALG0…
GO:0008137	NADH dehydrogenase (ubiquinone) activity	molecular_function	9.14e-11	3.72e-08	22	2696	29	14096	ENSGALG00000005704,ENSGALG00000004302,Novel02589,ENSGALG00000011325,ENSGALG00000008606,ENSGALG00000028026,ENSGALG00000043768,ENSGALG00000029172,ENSGALG00000008821,ENSGALG00000008084,ENSGALG00000036625,ENSGALG00000000629,ENSGALG00000042809,ENSGALG00000030436,ENSGALG00000027688,ENSGALG00000009703,ENSGALG00000037838,ENSGALG00000040987,ENSGALG00000042750,ENSGALG00000036229,ENSGALG00000029500,ENSGALG0…
GO:0050136	NADH dehydrogenase (quinone) activity	molecular_function	9.14e-11	3.72e-08	22	2696	29	14096	ENSGALG00000042809,ENSGALG00000036625,ENSGALG00000008084,ENSGALG00000000629,ENSGALG00000037838,ENSGALG00000009703,ENSGALG00000027688,ENSGALG00000030436,ENSGALG00000040987,ENSGALG00000042750,ENSGALG00000025999,ENSGALG00000029500,ENSGALG00000036229,ENSGALG00000004302,ENSGALG00000005704,ENSGALG00000011325,Novel02589,ENSGALG00000043768,ENSGALG00000028026,ENSGALG00000008606,ENSGALG00000008821,ENSGALG0…
GO:0016655	oxidoreductase activity, acting on NAD(P)H, quinone or similar compound as acceptor	molecular_function	7.33e-09	2.39e-06	23	2696	36	14096	Novel02589,Novel00437,ENSGALG00000011325,ENSGALG00000005704,ENSGALG00000004302,ENSGALG00000029172,ENSGALG00000008821,ENSGALG00000008606,ENSGALG00000043768,ENSGALG00000028026,ENSGALG00000030436,ENSGALG00000027688,ENSGALG00000009703,ENSGALG00000037838,ENSGALG00000042809,ENSGALG00000008084,ENSGALG00000000629,ENSGALG00000036625,ENSGALG00000029500,ENSGALG00000036229,ENSGALG00000025999,ENSGALG000000427…
GO:0022857	transmembrane transporter activity	molecular_function	1.63e-08	4.95e-06	218	2696	823	14096	ENSGALG00000011579,ENSGALG00000012298,ENSGALG00000004498,ENSGALG00000041091,ENSGALG00000002783,ENSGALG00000008456,ENSGALG00000028225,ENSGALG00000002728,ENSGALG00000014372,ENSGALG00000037744,ENSGALG00000001375,ENSGALG00000000394,ENSGALG00000005002,ENSGALG00000005822,ENSGALG00000032079,ENSGALG00000025788,ENSGALG00000005332,ENSGALG00000010182,ENSGALG00000032986,ENSGALG00000020002,ENSGALG00000012021,…
GO:0015075	ion transmembrane transporter activity	molecular_function	7.51e-08	1.82e-05	187	2696	699	14096	ENSGALG00000007906,ENSGALG00000003256,ENSGALG00000032986,ENSGALG00000020002,ENSGALG00000012021,ENSGALG00000005749,Novel01712,ENSGALG00000009687,ENSGALG00000035996,ENSGALG00000008066,ENSGALG00000015433,ENSGALG00000002707,ENSGALG00000007980,ENSGALG00000005845,ENSGALG00000002728,ENSGALG00000002783,ENSGALG00000008456,ENSGALG00000041091,ENSGALG00000004498,ENSGALG00000012298,ENSGALG00000025788,ENSGALG0…
GO:0022891	substrate-specific transmembrane transporter activity	molecular_function	8.02e-08	1.87e-05	199	2696	753	14096	ENSGALG00000010044,ENSGALG00000034077,Novel00960,ENSGALG00000011483,ENSGALG00000009286,ENSGALG00000004660,Novel03102,ENSGALG00000015233,ENSGALG00000006635,ENSGALG00000020505,Novel01024,ENSGALG00000019276,ENSGALG00000035334,ENSGALG00000016565,ENSGALG00000015751,ENSGALG00000008222,ENSGALG00000005215,Novel01511,ENSGALG00000011052,ENSGALG00000005995,ENSGALG00000010992,ENSGALG00000041808,ENSGALG000000…
GO:0015077	monovalent inorganic cation transmembrane transporter activity	molecular_function	1.01e-07	2.15e-05	96	2696	307	14096	ENSGALG00000010098,ENSGALG00000007926,Novel01013,ENSGALG00000011009,ENSGALG00000003582,ENSGALG00000037138,Novel01287,ENSGALG00000034025,ENSGALG00000011250,ENSGALG00000032142,ENSGALG00000001330,ENSGALG00000034427,ENSGALG00000010943,ENSGALG00000032456,ENSGALG00000015372,ENSGALG00000004980,Novel01511,ENSGALG00000006899,ENSGALG00000007863,ENSGALG00000010992,Novel00250,ENSGALG00000005995,ENSGALG000000…
GO:0008324	cation transmembrane transporter activity	molecular_function	1.67e-07	3.36e-05	147	2696	529	14096	ENSGALG00000038801,ENSGALG00000004355,ENSGALG00000001181,ENSGALG00000012985,ENSGALG00000003354,Novel00968,ENSGALG00000013244,ENSGALG00000027963,ENSGALG00000025819,ENSGALG00000007205,ENSGALG00000033002,Novel00752,ENSGALG00000013627,ENSGALG00000032465,ENSGALG00000012142,ENSGALG00000035144,ENSGALG00000027771,ENSGALG00000001452,ENSGALG00000025999,ENSGALG00000006922,ENSGALG00000012697,Novel01601,ENSGA…
GO:0022890	inorganic cation transmembrane transporter activity	molecular_function	3.31e-07	5.87e-05	126	2696	443	14096	ENSGALG00000007205,ENSGALG00000025819,ENSGALG00000027963,Novel00752,ENSGALG00000016017,ENSGALG00000039687,ENSGALG00000004376,ENSGALG00000032465,ENSGALG00000004355,ENSGALG00000038801,ENSGALG00000012985,ENSGALG00000011615,ENSGALG00000003354,ENSGALG00000028302,ENSGALG00000001181,ENSGALG00000016684,ENSGALG00000021272,Novel00968,ENSGALG00000026727,ENSGALG00000013244,ENSGALG00000040084,ENSGALG000000110…
GO:0005215	transporter activity	molecular_function	4.12e-07	7.11e-05	253	2696	1018	14096	ENSGALG00000006805,ENSGALG00000005215,ENSGALG00000008222,Novel01511,ENSGALG00000011052,ENSGALG00000010992,ENSGALG00000005792,ENSGALG00000005995,ENSGALG00000041808,ENSGALG00000015128,ENSGALG00000016707,ENSGALG00000026816,Novel00960,ENSGALG00000034077,ENSGALG00000010044,ENSGALG00000011483,ENSGALG00000009286,ENSGALG00000002111,Novel03102,ENSGALG00000008912,ENSGALG00000004660,ENSGALG00000017316,ENSGA…
GO:0016651	oxidoreductase activity, acting on NAD(P)H	molecular_function	1.25e-06	0.00019029	33	2696	76	14096	ENSGALG00000008821,ENSGALG00000012705,ENSGALG00000028026,Novel00437,ENSGALG00000017282,ENSGALG00000041418,ENSGALG00000005704,ENSGALG00000029500,ENSGALG00000036229,ENSGALG00000040987,ENSGALG00000042750,ENSGALG00000016261,ENSGALG00000030436,ENSGALG00000040173,ENSGALG00000008084,ENSGALG00000004003,ENSGALG00000028537,ENSGALG00000008063,ENSGALG00000029172,ENSGALG00000043768,ENSGALG00000008606,ENSGALG0…
GO:0004129	cytochrome-c oxidase activity	molecular_function	2.36e-06	0.00032245	15	2696	23	14096	ENSGALG00000001375,ENSGALG00000035996,ENSGALG00000032456,ENSGALG00000007863,Novel01877,ENSGALG00000014121,Novel01712,ENSGALG00000035334,ENSGALG00000025999,ENSGALG00000035144,ENSGALG00000037996,ENSGALG00000032142,ENSGALG00000005749,ENSGALG00000027963,ENSGALG00000007205
GO:0015002	heme-copper terminal oxidase activity	molecular_function	2.36e-06	0.00032245	15	2696	23	14096	ENSGALG00000035144,Novel01712,ENSGALG00000025999,ENSGALG00000035334,ENSGALG00000014121,Novel01877,ENSGALG00000035996,ENSGALG00000032456,ENSGALG00000007863,ENSGALG00000001375,ENSGALG00000007205,ENSGALG00000027963,ENSGALG00000032142,ENSGALG00000037996,ENSGALG00000005749
GO:0016675	oxidoreductase activity, acting on a heme group of donors	molecular_function	2.36e-06	0.00032245	15	2696	23	14096	ENSGALG00000001375,ENSGALG00000035996,ENSGALG00000032456,ENSGALG00000007863,ENSGALG00000014121,Novel01877,Novel01712,ENSGALG00000035334,ENSGALG00000025999,ENSGALG00000035144,ENSGALG00000032142,ENSGALG00000037996,ENSGALG00000005749,ENSGALG00000007205,ENSGALG00000027963
GO:0016676	oxidoreductase activity, acting on a heme group of donors, oxygen as acceptor	molecular_function	2.36e-06	0.00032245	15	2696	23	14096	Novel01712,ENSGALG00000025999,ENSGALG00000035334,ENSGALG00000035144,ENSGALG00000007863,ENSGALG00000035996,ENSGALG00000032456,ENSGALG00000001375,ENSGALG00000014121,Novel01877,ENSGALG00000007205,ENSGALG00000027963,ENSGALG00000005749,ENSGALG00000037996,ENSGALG00000032142
GO:0022892	substrate-specific transporter activity	molecular_function	4.3e-06	0.00055004	218	2696	873	14096	ENSGALG00000017380,ENSGALG00000010029,ENSGALG00000008486,ENSGALG00000014206,ENSGALG00000006753,ENSGALG00000003584,ENSGALG00000031597,ENSGALG00000004373,ENSGALG00000009545,ENSGALG00000028871,ENSGALG00000034895,ENSGALG00000004721,ENSGALG00000041932,ENSGALG00000017347,ENSGALG00000035094,ENSGALG00000028273,ENSGALG00000009919,ENSGALG00000002621,Novel00250,ENSGALG00000007863,ENSGALG00000003778,ENSGALG0…
GO:0015078	hydrogen ion transmembrane transporter activity	molecular_function	5.68e-06	0.00070227	40	2696	105	14096	ENSGALG00000001452,ENSGALG00000025999,ENSGALG00000035144,ENSGALG00000015372,ENSGALG00000032456,Novel01601,Novel01877,ENSGALG00000001330,ENSGALG00000032142,ENSGALG00000028302,ENSGALG00000038801,Novel01013,ENSGALG00000025819,ENSGALG00000027963,ENSGALG00000007205,ENSGALG00000032465,ENSGALG00000007926,Novel01024,ENSGALG00000035334,ENSGALG00000032079,ENSGALG00000015751,ENSGALG00000017380,ENSGALG000000…
GO:0001871	pattern binding	molecular_function	2.93e-05	0.0029843	10	2696	14	14096	ENSGALG00000016300,ENSGALG00000005407,ENSGALG00000028284,ENSGALG00000012275,ENSGALG00000043532,Novel00992,ENSGALG00000032746,ENSGALG00000027872,Novel02141,ENSGALG00000017715
GO:0030247	polysaccharide binding	molecular_function	2.93e-05	0.0029843	10	2696	14	14096	ENSGALG00000017715,ENSGALG00000027872,ENSGALG00000032746,Novel02141,Novel00992,ENSGALG00000043532,ENSGALG00000028284,ENSGALG00000012275,ENSGALG00000016300,ENSGALG00000005407
GO:0051536	iron-sulfur cluster binding	molecular_function	4.94e-05	0.0046373	26	2696	64	14096	ENSGALG00000008701,ENSGALG00000009703,ENSGALG00000004037,Novel00194,ENSGALG00000040173,ENSGALG00000041401,ENSGALG00000042809,ENSGALG00000016278,Novel01815,Novel01601,ENSGALG00000014673,ENSGALG00000011950,Novel03041,ENSGALG00000010051,ENSGALG00000020876,ENSGALG00000025819,Novel00526,ENSGALG00000009442,Novel02492,Novel01287,ENSGALG00000008185,ENSGALG00000002705,ENSGALG00000004869,ENSGALG00000005279…
GO:0051540	metal cluster binding	molecular_function	4.94e-05	0.0046373	26	2696	64	14096	Novel01815,ENSGALG00000016278,ENSGALG00000014673,Novel01601,ENSGALG00000009703,ENSGALG00000008701,ENSGALG00000042809,ENSGALG00000041401,ENSGALG00000040173,ENSGALG00000004037,Novel00194,ENSGALG00000002705,Novel01287,ENSGALG00000008185,ENSGALG00000008606,ENSGALG00000026507,ENSGALG00000004869,ENSGALG00000005279,ENSGALG00000009442,Novel00526,ENSGALG00000020876,ENSGALG00000025819,ENSGALG00000010051,EN…
GO:0008092	cytoskeletal protein binding	molecular_function	8.41e-05	0.0072152	146	2696	577	14096	ENSGALG00000010027,ENSGALG00000031593,ENSGALG00000005763,ENSGALG00000014646,ENSGALG00000034107,ENSGALG00000008914,ENSGALG00000007048,ENSGALG00000001727,ENSGALG00000034742,ENSGALG00000012577,ENSGALG00000036466,ENSGALG00000001475,ENSGALG00000031301,ENSGALG00000007080,ENSGALG00000002125,ENSGALG00000042458,ENSGALG00000003521,Novel01124,ENSGALG00000036805,ENSGALG00000001977,ENSGALG00000002845,ENSGALG0…
GO:0016679	oxidoreductase activity, acting on diphenols and related substances as donors	molecular_function	8.61e-05	0.0073488	10	2696	15	14096	ENSGALG00000028302,Novel01024,ENSGALG00000017380,ENSGALG00000032079,Novel02060,ENSGALG00000001096,ENSGALG00000008066,Novel01013,ENSGALG00000025819,Novel02820
GO:0004683	calmodulin-dependent protein kinase activity	molecular_function	0.00010017	0.0082347	11	2696	18	14096	ENSGALG00000015203,ENSGALG00000003845,ENSGALG00000007993,ENSGALG00000004801,ENSGALG00000002485,ENSGALG00000010440,ENSGALG00000004004,ENSGALG00000002283,ENSGALG00000000883,ENSGALG00000004334,ENSGALG00000005088
GO:0016903	oxidoreductase activity, acting on the aldehyde or oxo group of donors	molecular_function	0.00011728	0.00951	15	2696	30	14096	ENSGALG00000029576,ENSGALG00000014442,ENSGALG00000007931,ENSGALG00000014155,ENSGALG00000042184,ENSGALG00000016430,ENSGALG00000020876,ENSGALG00000033753,ENSGALG00000034655,ENSGALG00000014789,ENSGALG00000010211,ENSGALG00000007904,ENSGALG00000008185,ENSGALG00000015147,ENSGALG00000032544

## Sheet: E12 vs 10w
GO_accession	Description	Term_type	Over_represented_pValue	Corrected_pValue	DEG_item	DEG_list	Bg_item	Bg_list	Gene_names
GO:0009888	tissue development	biological_process	2.83e-16	5.07e-12	324	2677	1149	14096	ENSGALG00000004956,ENSGALG00000009089,ENSGALG00000001141,ENSGALG00000043287,ENSGALG00000011117,ENSGALG00000001006,ENSGALG00000012644,ENSGALG00000023195,ENSGALG00000006379,ENSGALG00000001780,ENSGALG00000003374,ENSGALG00000041299,ENSGALG00000026776,ENSGALG00000027213,ENSGALG00000040023,ENSGALG00000029292,ENSGALG00000011358,ENSGALG00000004044,ENSGALG00000033295,ENSGALG00000043555,ENSGALG00000006802,…
GO:0048856	anatomical structure development	biological_process	1.53e-14	1.37e-10	707	2677	2978	14096	ENSGALG00000003045,ENSGALG00000018503,ENSGALG00000041203,ENSGALG00000035725,ENSGALG00000026080,ENSGALG00000013822,ENSGALG00000040035,ENSGALG00000038520,ENSGALG00000028376,ENSGALG00000003472,ENSGALG00000009739,ENSGALG00000007466,ENSGALG00000011823,ENSGALG00000002112,ENSGALG00000039322,ENSGALG00000027471,ENSGALG00000013081,ENSGALG00000015729,ENSGALG00000011291,ENSGALG00000037687,ENSGALG00000010290,…
GO:0048731	system development	biological_process	4.97e-14	2.97e-10	600	2677	2474	14096	ENSGALG00000042604,ENSGALG00000012913,ENSGALG00000034716,ENSGALG00000013640,ENSGALG00000016309,ENSGALG00000037203,ENSGALG00000008014,ENSGALG00000008298,ENSGALG00000017235,ENSGALG00000028464,ENSGALG00000006508,ENSGALG00000011347,ENSGALG00000029261,ENSGALG00000016473,ENSGALG00000042422,ENSGALG00000015117,ENSGALG00000009274,ENSGALG00000027165,ENSGALG00000011404,ENSGALG00000004249,ENSGALG00000002223,…
GO:0044707	single-multicellular organism process	biological_process	7.61e-14	3.41e-10	807	2677	3487	14096	ENSGALG00000003899,ENSGALG00000041626,ENSGALG00000034094,ENSGALG00000016400,ENSGALG00000038364,ENSGALG00000011562,ENSGALG00000040582,ENSGALG00000017272,ENSGALG00000015480,ENSGALG00000000769,ENSGALG00000006755,ENSGALG00000005451,ENSGALG00000006480,ENSGALG00000030991,ENSGALG00000036255,ENSGALG00000000516,ENSGALG00000000949,ENSGALG00000015013,ENSGALG00000012178,ENSGALG00000012160,ENSGALG00000034895,…
GO:0007275	multicellular organismal development	biological_process	1.36e-13	4.05e-10	640	2677	2680	14096	ENSGALG00000005483,ENSGALG00000002708,ENSGALG00000013568,ENSGALG00000029669,ENSGALG00000024449,ENSGALG00000007121,ENSGALG00000009050,ENSGALG00000033510,ENSGALG00000000394,ENSGALG00000040755,ENSGALG00000003588,ENSGALG00000008945,ENSGALG00000005757,ENSGALG00000001812,ENSGALG00000038512,ENSGALG00000000284,ENSGALG00000015720,ENSGALG00000005594,ENSGALG00000015145,ENSGALG00000043460,ENSGALG00000006997,…
GO:0032501	multicellular organismal process	biological_process	1.43e-13	4.05e-10	828	2677	3600	14096	ENSGALG00000001690,ENSGALG00000015466,ENSGALG00000007226,ENSGALG00000024122,ENSGALG00000011990,ENSGALG00000004370,ENSGALG00000001124,ENSGALG00000005088,ENSGALG00000011353,ENSGALG00000015511,ENSGALG00000015142,ENSGALG00000012973,ENSGALG00000008098,ENSGALG00000007539,ENSGALG00000038559,ENSGALG00000009302,ENSGALG00000005095,ENSGALG00000039040,ENSGALG00000008702,ENSGALG00000037875,ENSGALG00000027513,…
GO:0048513	organ development	biological_process	1.11e-12	2.21e-09	456	2677	1823	14096	ENSGALG00000016444,ENSGALG00000001449,ENSGALG00000031895,ENSGALG00000043460,ENSGALG00000015305,ENSGALG00000010881,ENSGALG00000015145,ENSGALG00000008127,ENSGALG00000005849,ENSGALG00000008408,ENSGALG00000038512,ENSGALG00000041263,ENSGALG00000000284,ENSGALG00000008945,ENSGALG00000003588,ENSGALG00000005757,ENSGALG00000016034,ENSGALG00000033510,ENSGALG00000000394,ENSGALG00000014736,ENSGALG00000014463,…
GO:0032502	developmental process	biological_process	4.01e-12	6.53e-09	755	2677	3291	14096	ENSGALG00000036358,ENSGALG00000006186,ENSGALG00000005688,ENSGALG00000004747,ENSGALG00000035867,ENSGALG00000011076,ENSGALG00000004508,ENSGALG00000017091,ENSGALG00000036346,ENSGALG00000010356,ENSGALG00000002775,ENSGALG00000015410,ENSGALG00000008351,ENSGALG00000006886,ENSGALG00000016375,ENSGALG00000008969,ENSGALG00000013624,ENSGALG00000009107,ENSGALG00000033634,ENSGALG00000043355,ENSGALG00000035559,…
GO:0044767	single-organism developmental process	biological_process	9.37e-12	1.4e-08	745	2677	3254	14096	ENSGALG00000001079,ENSGALG00000000616,ENSGALG00000016680,ENSGALG00000042744,ENSGALG00000032790,ENSGALG00000043480,ENSGALG00000009048,ENSGALG00000028770,ENSGALG00000015910,ENSGALG00000030647,ENSGALG00000000894,ENSGALG00000019761,ENSGALG00000003282,ENSGALG00000007817,ENSGALG00000041988,ENSGALG00000009724,ENSGALG00000000367,ENSGALG00000041371,ENSGALG00000026077,ENSGALG00000003126,ENSGALG00000015425,…
GO:2000026	regulation of multicellular organismal development	biological_process	1.76e-10	2.1e-07	268	2677	1014	14096	ENSGALG00000001780,ENSGALG00000027213,ENSGALG00000020067,ENSGALG00000040938,ENSGALG00000009740,ENSGALG00000032545,ENSGALG00000011117,ENSGALG00000001006,ENSGALG00000001141,ENSGALG00000043287,ENSGALG00000012644,ENSGALG00000006379,ENSGALG00000004530,ENSGALG00000031859,ENSGALG00000032748,ENSGALG00000032398,ENSGALG00000012710,ENSGALG00000012594,ENSGALG00000029301,ENSGALG00000019019,ENSGALG00000031112,…
GO:0051094	positive regulation of developmental process	biological_process	2.09e-10	2.34e-07	198	2677	703	14096	ENSGALG00000027247,ENSGALG00000041371,ENSGALG00000013776,ENSGALG00000039322,ENSGALG00000015944,ENSGALG00000003126,ENSGALG00000015425,ENSGALG00000023420,ENSGALG00000002864,ENSGALG00000027355,ENSGALG00000013081,ENSGALG00000009424,ENSGALG00000042308,ENSGALG00000042664,ENSGALG00000033051,ENSGALG00000034168,ENSGALG00000042045,ENSGALG00000016102,ENSGALG00000001079,ENSGALG00000013822,ENSGALG00000038848,…
GO:0051239	regulation of multicellular organismal process	biological_process	2.43e-10	2.56e-07	378	2677	1524	14096	ENSGALG00000028682,ENSGALG00000015233,ENSGALG00000006785,ENSGALG00000008486,ENSGALG00000001097,ENSGALG00000010053,ENSGALG00000040276,ENSGALG00000017068,ENSGALG00000013616,ENSGALG00000006821,ENSGALG00000008177,ENSGALG00000000585,ENSGALG00000015390,ENSGALG00000037387,ENSGALG00000001021,ENSGALG00000007114,ENSGALG00000043355,ENSGALG00000006062,ENSGALG00000033520,ENSGALG00000016708,ENSGALG00000003137,…
GO:0044699	single-organism process	biological_process	5.05e-10	5.03e-07	1821	2677	8932	14096	ENSGALG00000017046,ENSGALG00000011668,ENSGALG00000027407,Novel02933,ENSGALG00000008697,ENSGALG00000043603,ENSGALG00000002388,ENSGALG00000019802,ENSGALG00000008601,ENSGALG00000039099,ENSGALG00000014873,ENSGALG00000030879,ENSGALG00000002103,ENSGALG00000013422,ENSGALG00000011657,ENSGALG00000021285,ENSGALG00000005854,Novel01580,ENSGALG00000008606,ENSGALG00000014155,ENSGALG00000015961,ENSGALG000000168…
GO:0030154	cell differentiation	biological_process	1.12e-09	1.04e-06	501	2677	2129	14096	ENSGALG00000030932,ENSGALG00000000044,ENSGALG00000003647,ENSGALG00000009270,ENSGALG00000015018,ENSGALG00000035951,ENSGALG00000013793,ENSGALG00000032386,ENSGALG00000031423,ENSGALG00000015079,ENSGALG00000008805,ENSGALG00000037352,ENSGALG00000039458,ENSGALG00000012735,ENSGALG00000006491,ENSGALG00000002831,ENSGALG00000005981,ENSGALG00000040993,ENSGALG00000003114,ENSGALG00000006273,ENSGALG00000007706,…
GO:0034762	regulation of transmembrane transport	biological_process	1.48e-09	1.26e-06	75	2677	206	14096	ENSGALG00000000367,ENSGALG00000006220,ENSGALG00000011009,ENSGALG00000021272,ENSGALG00000004373,ENSGALG00000002277,ENSGALG00000008081,ENSGALG00000014994,ENSGALG00000012142,ENSGALG00000009919,ENSGALG00000027583,ENSGALG00000009995,ENSGALG00000034621,ENSGALG00000010204,ENSGALG00000005215,ENSGALG00000037203,ENSGALG00000000775,ENSGALG00000006190,ENSGALG00000030781,ENSGALG00000014736,ENSGALG00000014463,…
GO:0050793	regulation of developmental process	biological_process	1.68e-09	1.37e-06	337	2677	1355	14096	ENSGALG00000032658,ENSGALG00000013861,ENSGALG00000013793,ENSGALG00000031423,ENSGALG00000003647,ENSGALG00000007706,ENSGALG00000003114,ENSGALG00000040993,ENSGALG00000002831,ENSGALG00000005981,ENSGALG00000039458,ENSGALG00000037352,ENSGALG00000009638,ENSGALG00000012735,ENSGALG00000010133,ENSGALG00000001565,ENSGALG00000015593,ENSGALG00000031890,ENSGALG00000003863,ENSGALG00000038813,ENSGALG00000013372,…
GO:0034765	regulation of ion transmembrane transport	biological_process	2.37e-09	1.85e-06	72	2677	195	14096	ENSGALG00000008456,ENSGALG00000026287,ENSGALG00000027483,ENSGALG00000038850,ENSGALG00000016607,ENSGALG00000017168,ENSGALG00000014848,ENSGALG00000027793,ENSGALG00000029502,ENSGALG00000014463,ENSGALG00000014736,ENSGALG00000001512,ENSGALG00000043764,ENSGALG00000006190,ENSGALG00000000775,ENSGALG00000010204,ENSGALG00000005215,ENSGALG00000037203,ENSGALG00000027583,ENSGALG00000034621,ENSGALG00000009995,…
GO:0007166	cell surface receptor signaling pathway	biological_process	3.57e-09	2.67e-06	346	2677	1404	14096	ENSGALG00000009170,ENSGALG00000002113,ENSGALG00000013372,ENSGALG00000035369,ENSGALG00000003863,ENSGALG00000005852,ENSGALG00000015362,ENSGALG00000015593,ENSGALG00000008262,ENSGALG00000008514,ENSGALG00000009081,ENSGALG00000038355,ENSGALG00000037841,ENSGALG00000001916,ENSGALG00000005698,ENSGALG00000008609,ENSGALG00000031255,ENSGALG00000010875,ENSGALG00000013861,ENSGALG00000027305,ENSGALG00000026499,…
GO:0061061	muscle structure development	biological_process	9.11e-09	6.28e-06	111	2677	357	14096	ENSGALG00000043555,ENSGALG00000032287,ENSGALG00000016281,ENSGALG00000007706,ENSGALG00000003114,ENSGALG00000018946,ENSGALG00000006273,ENSGALG00000006491,ENSGALG00000012735,ENSGALG00000001021,ENSGALG00000008747,ENSGALG00000039458,ENSGALG00000040023,ENSGALG00000042657,ENSGALG00000000839,ENSGALG00000004044,ENSGALG00000007114,ENSGALG00000033295,ENSGALG00000031423,ENSGALG00000008805,ENSGALG00000012790,…
GO:0035113	embryonic appendage morphogenesis	biological_process	1.95e-08	1.29e-05	45	2677	106	14096	ENSGALG00000001079,ENSGALG00000016102,ENSGALG00000014686,ENSGALG00000027513,ENSGALG00000003324,ENSGALG00000035725,ENSGALG00000032584,ENSGALG00000031960,ENSGALG00000038848,ENSGALG00000023195,ENSGALG00000006379,ENSGALG00000038355,ENSGALG00000029140,ENSGALG00000032039,ENSGALG00000025748,ENSGALG00000009724,ENSGALG00000027213,ENSGALG00000030030,ENSGALG00000035016,ENSGALG00000039238,ENSGALG00000014873,…
GO:0007517	muscle organ development	biological_process	2.05e-08	1.31e-05	74	2677	213	14096	ENSGALG00000042657,ENSGALG00000033295,ENSGALG00000006491,ENSGALG00000012735,ENSGALG00000001021,ENSGALG00000039458,ENSGALG00000040023,ENSGALG00000007706,ENSGALG00000016281,ENSGALG00000006273,ENSGALG00000003114,ENSGALG00000029301,ENSGALG00000015935,ENSGALG00000027069,ENSGALG00000009270,ENSGALG00000003521,ENSGALG00000015422,ENSGALG00000012790,ENSGALG00000031423,ENSGALG00000043287,ENSGALG00000005519,…
GO:0009887	organ morphogenesis	biological_process	2.12e-08	1.31e-05	173	2677	629	14096	ENSGALG00000015166,ENSGALG00000009641,ENSGALG00000010125,ENSGALG00000003114,ENSGALG00000003720,ENSGALG00000006273,ENSGALG00000009875,ENSGALG00000007706,ENSGALG00000043555,ENSGALG00000011358,ENSGALG00000002298,ENSGALG00000012735,ENSGALG00000006491,ENSGALG00000031112,ENSGALG00000012790,ENSGALG00000013861,ENSGALG00000041555,ENSGALG00000035539,ENSGALG00000009755,ENSGALG00000003521,ENSGALG00000009270,…
GO:0003012	muscle system process	biological_process	2.69e-08	1.51e-05	67	2677	185	14096	ENSGALG00000017168,ENSGALG00000014848,ENSGALG00000006835,ENSGALG00000041285,ENSGALG00000002125,ENSGALG00000007681,ENSGALG00000001459,ENSGALG00000006216,ENSGALG00000009519,ENSGALG00000016342,ENSGALG00000014463,ENSGALG00000012913,ENSGALG00000034716,ENSGALG00000008349,ENSGALG00000015142,ENSGALG00000038884,ENSGALG00000007048,ENSGALG00000027583,ENSGALG00000005088,ENSGALG00000002845,ENSGALG00000004370,…
GO:0043269	regulation of ion transport	biological_process	2.97e-08	1.61e-05	95	2677	299	14096	ENSGALG00000040938,ENSGALG00000003863,ENSGALG00000043603,ENSGALG00000004074,ENSGALG00000041640,ENSGALG00000012178,ENSGALG00000010269,ENSGALG00000016448,ENSGALG00000008262,ENSGALG00000014873,ENSGALG00000004721,ENSGALG00000011715,ENSGALG00000035799,ENSGALG00000006922,ENSGALG00000020505,ENSGALG00000002707,ENSGALG00000036214,ENSGALG00000004376,ENSGALG00000007980,ENSGALG00000012155,ENSGALG00000007409,…
GO:0030326	embryonic limb morphogenesis	biological_process	4.48e-08	2.24e-05	44	2677	105	14096	ENSGALG00000023195,ENSGALG00000006379,ENSGALG00000038355,ENSGALG00000029140,ENSGALG00000032039,ENSGALG00000025748,ENSGALG00000009724,ENSGALG00000014686,ENSGALG00000001079,ENSGALG00000016102,ENSGALG00000027513,ENSGALG00000003324,ENSGALG00000035725,ENSGALG00000032584,ENSGALG00000031960,ENSGALG00000038848,ENSGALG00000039728,ENSGALG00000041640,ENSGALG00000006087,ENSGALG00000034168,ENSGALG00000007668,…
GO:0060537	muscle tissue development	biological_process	4.5e-08	2.24e-05	82	2677	249	14096	ENSGALG00000027247,ENSGALG00000027583,ENSGALG00000003126,ENSGALG00000007539,ENSGALG00000009424,ENSGALG00000025887,ENSGALG00000006544,ENSGALG00000015142,ENSGALG00000034168,ENSGALG00000016102,ENSGALG00000027513,ENSGALG00000041988,ENSGALG00000009724,ENSGALG00000025748,ENSGALG00000010881,ENSGALG00000006216,ENSGALG00000001459,ENSGALG00000043727,ENSGALG00000013968,ENSGALG00000016473,ENSGALG00000001449,…
GO:0045595	regulation of cell differentiation	biological_process	5.5e-08	2.66e-05	237	2677	929	14096	ENSGALG00000040938,ENSGALG00000013372,ENSGALG00000038813,ENSGALG00000015593,ENSGALG00000032545,ENSGALG00000009740,ENSGALG00000010133,ENSGALG00000001780,ENSGALG00000042351,ENSGALG00000008514,ENSGALG00000035016,ENSGALG00000027213,ENSGALG00000039118,ENSGALG00000005698,ENSGALG00000011541,ENSGALG00000016954,ENSGALG00000038355,ENSGALG00000006379,ENSGALG00000002160,ENSGALG00000001916,ENSGALG00000040180,…
GO:0048869	cellular developmental process	biological_process	6.46e-08	3.05e-05	528	2677	2327	14096	ENSGALG00000006390,ENSGALG00000011740,ENSGALG00000014858,ENSGALG00000008716,ENSGALG00000032287,ENSGALG00000033231,ENSGALG00000015422,ENSGALG00000002759,ENSGALG00000007324,ENSGALG00000012541,ENSGALG00000014759,ENSGALG00000034950,ENSGALG00000001828,ENSGALG00000002562,ENSGALG00000004526,ENSGALG00000017462,ENSGALG00000016740,ENSGALG00000039170,ENSGALG00000002707,ENSGALG00000014984,ENSGALG00000000317,…
GO:0044763	single-organism cellular process	biological_process	7.52e-08	3.46e-05	1593	2677	7821	14096	ENSGALG00000011360,ENSGALG00000032184,ENSGALG00000010440,ENSGALG00000021362,ENSGALG00000008814,ENSGALG00000008444,ENSGALG00000002908,ENSGALG00000005332,ENSGALG00000015079,ENSGALG00000006600,ENSGALG00000013793,ENSGALG00000027330,Novel02311,ENSGALG00000014569,ENSGALG00000029020,ENSGALG00000011094,ENSGALG00000015542,ENSGALG00000026971,ENSGALG00000012275,ENSGALG00000010375,ENSGALG00000014442,ENSGALG0…
GO:0051240	positive regulation of multicellular organismal process	biological_process	1.07e-07	4.51e-05	211	2677	818	14096	ENSGALG00000008609,ENSGALG00000031255,ENSGALG00000043287,ENSGALG00000011117,ENSGALG00000016954,ENSGALG00000001416,ENSGALG00000011541,ENSGALG00000038355,ENSGALG00000002160,ENSGALG00000006379,ENSGALG00000040180,ENSGALG00000012644,ENSGALG00000042351,ENSGALG00000035016,ENSGALG00000043209,ENSGALG00000036214,ENSGALG00000027213,ENSGALG00000040938,ENSGALG00000003863,ENSGALG00000013372,ENSGALG00000020067,…
GO:0048598	embryonic morphogenesis	biological_process	1.17e-07	4.78e-05	122	2677	422	14096	ENSGALG00000042422,ENSGALG00000016473,ENSGALG00000005285,ENSGALG00000007932,ENSGALG00000012775,ENSGALG00000001449,ENSGALG00000043460,ENSGALG00000005554,ENSGALG00000011347,ENSGALG00000007681,ENSGALG00000002744,ENSGALG00000004249,ENSGALG00000000284,ENSGALG00000003588,ENSGALG00000005123,ENSGALG00000009274,ENSGALG00000009129,ENSGALG00000037687,ENSGALG00000008018,ENSGALG00000043428,ENSGALG00000010170,…
GO:0006936	muscle contraction	biological_process	1.43e-07	5.59e-05	56	2677	151	14096	ENSGALG00000006591,ENSGALG00000016342,ENSGALG00000043555,ENSGALG00000018946,ENSGALG00000038787,ENSGALG00000006273,ENSGALG00000016281,ENSGALG00000037744,ENSGALG00000012913,ENSGALG00000029694,ENSGALG00000014463,ENSGALG00000004044,ENSGALG00000012735,ENSGALG00000001021,Novel01024,ENSGALG00000012783,ENSGALG00000000585,ENSGALG00000008177,ENSGALG00000014848,ENSGALG00000008805,ENSGALG00000012790,ENSGALG0…
GO:0048736	appendage development	biological_process	1.5e-07	5.6e-05	55	2677	148	14096	ENSGALG00000003647,ENSGALG00000016473,ENSGALG00000005285,ENSGALG00000009270,ENSGALG00000011347,ENSGALG00000009274,ENSGALG00000009129,ENSGALG00000005123,ENSGALG00000040276,ENSGALG00000007324,ENSGALG00000037687,ENSGALG00000000839,ENSGALG00000042657,ENSGALG00000003283,ENSGALG00000043428,ENSGALG00000023640,ENSGALG00000009415,ENSGALG00000035237,ENSGALG00000007706,ENSGALG00000010170,ENSGALG00000000902,…
GO:0006811	ion transport	biological_process	1.61e-07	5.72e-05	252	2677	1011	14096	ENSGALG00000010098,ENSGALG00000004980,ENSGALG00000016281,Novel02808,ENSGALG00000005621,ENSGALG00000010375,ENSGALG00000003778,ENSGALG00000028871,Novel01351,ENSGALG00000009638,Novel01063,ENSGALG00000029694,ENSGALG00000026727,ENSGALG00000037744,ENSGALG00000004096,ENSGALG00000016791,Novel01601,ENSGALG00000015128,ENSGALG00000003553,ENSGALG00000005332,ENSGALG00000010357,ENSGALG00000041808,ENSGALG000000…
GO:0009653	anatomical structure morphogenesis	biological_process	1.63e-07	5.72e-05	386	2677	1654	14096	ENSGALG00000043433,ENSGALG00000030991,ENSGALG00000006480,ENSGALG00000032628,ENSGALG00000015480,ENSGALG00000015013,ENSGALG00000002707,ENSGALG00000000949,ENSGALG00000039170,ENSGALG00000012155,ENSGALG00000041626,ENSGALG00000034094,ENSGALG00000003899,ENSGALG00000004526,ENSGALG00000016852,ENSGALG00000038364,ENSGALG00000011562,Novel03092,ENSGALG00000002562,ENSGALG00000020726,ENSGALG00000004598,ENSGALG0…
GO:0050896	response to stimulus	biological_process	1.76e-07	6.08e-05	997	2677	4710	14096	ENSGALG00000007448,ENSGALG00000009700,ENSGALG00000013468,ENSGALG00000025948,ENSGALG00000003473,ENSGALG00000011248,ENSGALG00000005476,ENSGALG00000038848,ENSGALG00000019719,ENSGALG00000005347,ENSGALG00000016426,ENSGALG00000016102,ENSGALG00000006037,ENSGALG00000042308,ENSGALG00000009424,ENSGALG00000014372,ENSGALG00000038629,ENSGALG00000038330,ENSGALG00000008141,ENSGALG00000028863,ENSGALG00000040627,…
GO:0007155	cell adhesion	biological_process	2.04e-07	6.91e-05	190	2677	731	14096	ENSGALG00000014804,ENSGALG00000016941,ENSGALG00000005644,ENSGALG00000008747,ENSGALG00000006390,ENSGALG00000003283,ENSGALG00000042657,ENSGALG00000016934,Novel01926,ENSGALG00000039121,ENSGALG00000007114,Novel02911,ENSGALG00000012662,ENSGALG00000009758,ENSGALG00000008716,ENSGALG00000002990,ENSGALG00000029270,ENSGALG00000014203,ENSGALG00000011469,ENSGALG00000026862,ENSGALG00000004594,ENSGALG000000067…
GO:0003008	system process	biological_process	2.13e-07	7.07e-05	214	2677	835	14096	ENSGALG00000040114,ENSGALG00000006503,ENSGALG00000039170,ENSGALG00000007647,ENSGALG00000011562,ENSGALG00000038933,ENSGALG00000014695,ENSGALG00000036782,ENSGALG00000004526,ENSGALG00000030251,ENSGALG00000015410,ENSGALG00000031960,ENSGALG00000008351,ENSGALG00000020505,ENSGALG00000004376,ENSGALG00000000949,ENSGALG00000009107,ENSGALG00000002707,ENSGALG00000014984,ENSGALG00000014873,ENSGALG00000013624,…
GO:0055085	transmembrane transport	biological_process	2.44e-07	7.82e-05	214	2677	839	14096	ENSGALG00000005083,ENSGALG00000001645,ENSGALG00000001330,ENSGALG00000006190,ENSGALG00000011220,ENSGALG00000036360,ENSGALG00000004240,ENSGALG00000029502,ENSGALG00000016684,ENSGALG00000043764,ENSGALG00000002621,ENSGALG00000016607,ENSGALG00000029392,ENSGALG00000008960,Novel03086,ENSGALG00000013244,ENSGALG00000008456,ENSGALG00000038850,ENSGALG00000006511,ENSGALG00000026287,ENSGALG00000005995,ENSGALG0…
GO:0022610	biological adhesion	biological_process	2.97e-07	9.05e-05	190	2677	735	14096	ENSGALG00000012456,ENSGALG00000007412,ENSGALG00000008514,ENSGALG00000042351,ENSGALG00000004472,Novel00074,ENSGALG00000015593,ENSGALG00000034970,ENSGALG00000013372,ENSGALG00000035369,ENSGALG00000003863,ENSGALG00000040938,ENSGALG00000009740,ENSGALG00000010875,ENSGALG00000002546,ENSGALG00000017398,ENSGALG00000010928,ENSGALG00000043287,ENSGALG00000001141,ENSGALG00000015140,ENSGALG00000015395,ENSGALG0…
GO:0060173	limb development	biological_process	3.01e-07	9.05e-05	54	2677	147	14096	ENSGALG00000009724,ENSGALG00000025748,ENSGALG00000032039,ENSGALG00000029140,ENSGALG00000038355,ENSGALG00000023195,ENSGALG00000006379,ENSGALG00000016680,ENSGALG00000038848,ENSGALG00000031960,ENSGALG00000035725,ENSGALG00000032584,ENSGALG00000016102,ENSGALG00000001079,ENSGALG00000014686,ENSGALG00000003324,ENSGALG00000027513,ENSGALG00000006087,ENSGALG00000034168,ENSGALG00000007668,ENSGALG00000043433,…
GO:0014706	striated muscle tissue development	biological_process	3.08e-07	9.05e-05	76	2677	235	14096	ENSGALG00000012913,ENSGALG00000034716,ENSGALG00000011291,ENSGALG00000014736,ENSGALG00000014463,ENSGALG00000009050,ENSGALG00000016309,ENSGALG00000033510,ENSGALG00000005292,ENSGALG00000002958,ENSGALG00000037203,ENSGALG00000003886,ENSGALG00000017235,ENSGALG00000011086,ENSGALG00000010881,ENSGALG00000006216,ENSGALG00000001459,ENSGALG00000043727,ENSGALG00000013968,ENSGALG00000026858,ENSGALG00000008945,…
GO:0042391	regulation of membrane potential	biological_process	3.08e-07	9.05e-05	67	2677	200	14096	ENSGALG00000040938,ENSGALG00000003863,ENSGALG00000008222,ENSGALG00000014873,ENSGALG00000008606,ENSGALG00000020505,ENSGALG00000009107,ENSGALG00000004376,ENSGALG00000036214,ENSGALG00000002707,ENSGALG00000011005,ENSGALG00000007409,ENSGALG00000007666,ENSGALG00000002160,ENSGALG00000036782,ENSGALG00000015410,ENSGALG00000008351,ENSGALG00000011562,ENSGALG00000043287,ENSGALG00000007931,ENSGALG00000005332,…
GO:0006941	striated muscle contraction	biological_process	3.24e-07	9.36e-05	33	2677	73	14096	ENSGALG00000004044,ENSGALG00000029694,ENSGALG00000012913,ENSGALG00000016281,ENSGALG00000006273,ENSGALG00000006591,ENSGALG00000041285,ENSGALG00000015018,ENSGALG00000001459,ENSGALG00000009519,ENSGALG00000003521,ENSGALG00000015233,ENSGALG00000000585,ENSGALG00000008177,ENSGALG00000008486,ENSGALG00000012790,ENSGALG00000006835,ENSGALG00000042744,ENSGALG00000009089,ENSGALG00000008351,ENSGALG00000043287,…
GO:0006091	generation of precursor metabolites and energy	biological_process	4.17e-07	0.00011682	66	2677	194	14096	ENSGALG00000008066,ENSGALG00000011950,ENSGALG00000005095,ENSGALG00000040716,ENSGALG00000037593,ENSGALG00000008821,ENSGALG00000019967,ENSGALG00000026077,Novel03197,ENSGALG00000039101,ENSGALG00000004801,ENSGALG00000013568,ENSGALG00000036360,ENSGALG00000043290,ENSGALG00000001949,ENSGALG00000002485,ENSGALG00000011016,ENSGALG00000011219,ENSGALG00000007606,ENSGALG00000007716,ENSGALG00000016600,ENSGALG0…
GO:0035107	appendage morphogenesis	biological_process	4.35e-07	0.00011981	47	2677	123	14096	ENSGALG00000041640,ENSGALG00000039728,ENSGALG00000034168,ENSGALG00000006087,ENSGALG00000007668,ENSGALG00000027213,ENSGALG00000015013,ENSGALG00000030030,ENSGALG00000039238,ENSGALG00000035016,ENSGALG00000014873,ENSGALG00000038355,ENSGALG00000023195,ENSGALG00000006379,ENSGALG00000009724,ENSGALG00000025748,ENSGALG00000029140,ENSGALG00000032039,ENSGALG00000035725,ENSGALG00000032584,ENSGALG00000001079,…
GO:0015980	energy derivation by oxidation of organic compounds	biological_process	4.58e-07	0.00012447	51	2677	137	14096	ENSGALG00000011950,ENSGALG00000013191,ENSGALG00000008066,ENSGALG00000037593,ENSGALG00000040716,ENSGALG00000034397,ENSGALG00000007931,ENSGALG00000005095,ENSGALG00000032544,ENSGALG00000004004,ENSGALG00000019967,ENSGALG00000001375,ENSGALG00000008821,ENSGALG00000004801,ENSGALG00000036214,ENSGALG00000015961,ENSGALG00000026776,ENSGALG00000008606,ENSGALG00000014155,ENSGALG00000042851,Novel03197,ENSGALG0…
GO:0002474	antigen processing and presentation of peptide antigen via MHC class I	biological_process	5.36e-07	0.00014329	12	2677	15	14096	ENSGALG00000014684,ENSGALG00000012869,ENSGALG00000032602,ENSGALG00000033694,ENSGALG00000008912,ENSGALG00000041380,ENSGALG00000035075,ENSGALG00000014428,ENSGALG00000002160,ENSGALG00000033680,ENSGALG00000029381,ENSGALG00000033932
GO:0050673	epithelial cell proliferation	biological_process	5.92e-07	0.0001542	67	2677	202	14096	ENSGALG00000013568,ENSGALG00000012873,ENSGALG00000000902,ENSGALG00000010170,ENSGALG00000010290,ENSGALG00000008014,ENSGALG00000037203,ENSGALG00000009241,ENSGALG00000005483,ENSGALG00000008701,ENSGALG00000005123,ENSGALG00000027374,ENSGALG00000009129,ENSGALG00000008713,ENSGALG00000042422,ENSGALG00000016473,ENSGALG00000007681,ENSGALG00000043460,ENSGALG00000025748,ENSGALG00000003473,ENSGALG00000007817,…
GO:0008016	regulation of heart contraction	biological_process	6.57e-07	0.00016832	38	2677	92	14096	ENSGALG00000034895,ENSGALG00000016281,ENSGALG00000032287,ENSGALG00000004044,ENSGALG00000029694,ENSGALG00000034716,ENSGALG00000012913,ENSGALG00000003163,ENSGALG00000012735,ENSGALG00000008486,ENSGALG00000012790,ENSGALG00000003588,ENSGALG00000000585,ENSGALG00000008177,ENSGALG00000010005,ENSGALG00000004096,ENSGALG00000015233,ENSGALG00000005332,ENSGALG00000011404,ENSGALG00000003521,ENSGALG00000015018,…
GO:0048729	tissue morphogenesis	biological_process	6.78e-07	0.00017123	117	2677	415	14096	ENSGALG00000015132,ENSGALG00000012792,ENSGALG00000039238,ENSGALG00000015466,ENSGALG00000030030,ENSGALG00000011823,ENSGALG00000038225,ENSGALG00000001124,ENSGALG00000027247,ENSGALG00000007668,ENSGALG00000042045,ENSGALG00000034168,ENSGALG00000006087,ENSGALG00000012973,ENSGALG00000030643,ENSGALG00000003767,ENSGALG00000042308,ENSGALG00000006775,ENSGALG00000032790,ENSGALG00000008702,ENSGALG00000038848,…
GO:0035108	limb morphogenesis	biological_process	8.99e-07	0.0002176	46	2677	122	14096	ENSGALG00000037203,ENSGALG00000009241,ENSGALG00000035237,ENSGALG00000010170,ENSGALG00000007706,ENSGALG00000003114,ENSGALG00000042657,ENSGALG00000043428,ENSGALG00000037687,ENSGALG00000009129,ENSGALG00000009274,ENSGALG00000005123,ENSGALG00000040276,ENSGALG00000007324,ENSGALG00000011347,ENSGALG00000009270,ENSGALG00000016473,ENSGALG00000005285,ENSGALG00000038355,ENSGALG00000006379,ENSGALG00000023195,…
GO:0050678	regulation of epithelial cell proliferation	biological_process	1.33e-06	0.00031834	57	2677	164	14096	ENSGALG00000037203,ENSGALG00000010859,ENSGALG00000010290,ENSGALG00000005483,ENSGALG00000009241,ENSGALG00000013568,ENSGALG00000000902,ENSGALG00000009875,ENSGALG00000010170,ENSGALG00000003114,ENSGALG00000012873,ENSGALG00000005981,ENSGALG00000042657,ENSGALG00000033295,ENSGALG00000014804,ENSGALG00000009129,ENSGALG00000007651,ENSGALG00000006821,ENSGALG00000027374,ENSGALG00000008713,ENSGALG00000013861,…
GO:0060047	heart contraction	biological_process	1.42e-06	0.00032947	43	2677	112	14096	ENSGALG00000021272,ENSGALG00000011117,ENSGALG00000043287,ENSGALG00000015410,ENSGALG00000008351,ENSGALG00000042744,ENSGALG00000001416,ENSGALG00000000364,ENSGALG00000007409,ENSGALG00000004376,ENSGALG00000000949,ENSGALG00000004370,ENSGALG00000002845,ENSGALG00000011353,ENSGALG00000027583,ENSGALG00000014873,ENSGALG00000015142,ENSGALG00000029694,ENSGALG00000034716,ENSGALG00000012913,ENSGALG00000004044,…
GO:0048002	antigen processing and presentation of peptide antigen	biological_process	1.49e-06	0.00034011	15	2677	23	14096	ENSGALG00000035075,ENSGALG00000000775,ENSGALG00000014428,ENSGALG00000004594,ENSGALG00000033680,ENSGALG00000002160,ENSGALG00000029381,ENSGALG00000033932,ENSGALG00000012869,ENSGALG00000014684,ENSGALG00000007932,ENSGALG00000032602,ENSGALG00000033694,ENSGALG00000008912,ENSGALG00000041380
GO:0048468	cell development	biological_process	1.5e-06	0.00034011	304	2677	1278	14096	ENSGALG00000023266,ENSGALG00000040256,ENSGALG00000041555,ENSGALG00000002988,ENSGALG00000004530,ENSGALG00000001977,ENSGALG00000031859,ENSGALG00000035052,ENSGALG00000032398,ENSGALG00000003521,ENSGALG00000012710,ENSGALG00000012594,ENSGALG00000022557,ENSGALG00000019019,ENSGALG00000029301,ENSGALG00000018946,ENSGALG00000006802,ENSGALG00000009875,ENSGALG00000016281,ENSGALG00000041094,ENSGALG00000004044,…
GO:0060429	epithelium development	biological_process	1.62e-06	0.00036249	171	2677	656	14096	ENSGALG00000043555,ENSGALG00000003114,ENSGALG00000006802,ENSGALG00000016281,ENSGALG00000007706,ENSGALG00000009875,ENSGALG00000001191,ENSGALG00000012735,ENSGALG00000029292,ENSGALG00000011358,ENSGALG00000005981,ENSGALG00000015079,ENSGALG00000003553,ENSGALG00000013793,ENSGALG00000041470,ENSGALG00000007651,ENSGALG00000012790,ENSGALG00000003647,ENSGALG00000011355,ENSGALG00000002988,ENSGALG00000031859,…
GO:0003015	heart process	biological_process	1.89e-06	0.00041797	43	2677	113	14096	ENSGALG00000015142,ENSGALG00000000949,ENSGALG00000004376,ENSGALG00000004370,ENSGALG00000002845,ENSGALG00000011353,ENSGALG00000014873,ENSGALG00000027583,ENSGALG00000001416,ENSGALG00000000364,ENSGALG00000007409,ENSGALG00000011117,ENSGALG00000021272,ENSGALG00000043287,ENSGALG00000008351,ENSGALG00000015410,ENSGALG00000042744,ENSGALG00000008486,ENSGALG00000012790,ENSGALG00000003588,ENSGALG00000014848,…
GO:0098609	cell-cell adhesion	biological_process	2.07e-06	0.00045259	125	2677	455	14096	ENSGALG00000032790,ENSGALG00000039040,ENSGALG00000035679,ENSGALG00000005347,ENSGALG00000016102,ENSGALG00000004260,ENSGALG00000008537,ENSGALG00000003285,ENSGALG00000025948,ENSGALG00000032530,ENSGALG00000003282,ENSGALG00000000608,ENSGALG00000033278,ENSGALG00000015132,ENSGALG00000016986,ENSGALG00000011823,ENSGALG00000011319,ENSGALG00000002845,ENSGALG00000035094,ENSGALG00000027247,ENSGALG00000009870,…
GO:0045597	positive regulation of cell differentiation	biological_process	2.72e-06	0.00056008	133	2677	490	14096	ENSGALG00000010936,ENSGALG00000007932,ENSGALG00000008028,ENSGALG00000039200,ENSGALG00000036456,ENSGALG00000035182,ENSGALG00000005554,ENSGALG00000010707,ENSGALG00000030676,ENSGALG00000000902,ENSGALG00000001486,ENSGALG00000015519,ENSGALG00000009241,ENSGALG00000000314,ENSGALG00000014496,ENSGALG00000008018,ENSGALG00000039682,ENSGALG00000007668,ENSGALG00000002515,ENSGALG00000013956,ENSGALG00000009157,…
GO:0034220	ion transmembrane transport	biological_process	3.07e-06	0.00061811	155	2677	589	14096	ENSGALG00000012710,ENSGALG00000006202,ENSGALG00000012594,ENSGALG00000015018,ENSGALG00000034427,ENSGALG00000041808,ENSGALG00000004096,ENSGALG00000016791,ENSGALG00000015128,ENSGALG00000005332,ENSGALG00000029694,ENSGALG00000026727,Novel01063,ENSGALG00000009638,ENSGALG00000004980,ENSGALG00000010098,ENSGALG00000016281,ENSGALG00000010375,ENSGALG00000003778,Novel00960,ENSGALG00000006922,ENSGALG000000117…
GO:0001501	skeletal system development	biological_process	3.42e-06	0.0006775	100	2677	346	14096	ENSGALG00000029301,ENSGALG00000009270,ENSGALG00000000044,ENSGALG00000031859,ENSGALG00000041555,ENSGALG00000007324,ENSGALG00000031112,ENSGALG00000001097,ENSGALG00000040276,ENSGALG00000039051,ENSGALG00000035539,ENSGALG00000006725,ENSGALG00000003283,ENSGALG00000000839,ENSGALG00000005981,ENSGALG00000002831,ENSGALG00000004833,ENSGALG00000012735,ENSGALG00000009638,ENSGALG00000015627,ENSGALG00000011740,…
GO:0031214	biomineral tissue development	biological_process	3.44e-06	0.0006775	31	2677	73	14096	ENSGALG00000009638,ENSGALG00000005476,ENSGALG00000026080,ENSGALG00000004239,ENSGALG00000000839,ENSGALG00000014686,ENSGALG00000010928,ENSGALG00000009724,ENSGALG00000003137,ENSGALG00000016820,ENSGALG00000040035,ENSGALG00000012775,ENSGALG00000016473,ENSGALG00000039200,ENSGALG00000014873,ENSGALG00000039322,ENSGALG00000017183,ENSGALG00000030030,ENSGALG00000029301,ENSGALG00000012964,ENSGALG00000010927,…
GO:0061448	connective tissue development	biological_process	3.7e-06	0.00072035	57	2677	169	14096	ENSGALG00000038848,ENSGALG00000005476,ENSGALG00000002546,ENSGALG00000005095,ENSGALG00000010875,ENSGALG00000001141,ENSGALG00000038364,ENSGALG00000003324,ENSGALG00000009724,ENSGALG00000025748,ENSGALG00000000364,ENSGALG00000038355,ENSGALG00000006379,ENSGALG00000012644,ENSGALG00000015132,ENSGALG00000015013,ENSGALG00000012178,ENSGALG00000030030,ENSGALG00000035016,ENSGALG00000042851,ENSGALG00000040418,…
GO:0055001	muscle cell development	biological_process	4.18e-06	0.00080462	38	2677	99	14096	ENSGALG00000006520,ENSGALG00000019719,ENSGALG00000009089,ENSGALG00000015410,ENSGALG00000031960,ENSGALG00000008351,ENSGALG00000035016,ENSGALG00000013624,ENSGALG00000039728,ENSGALG00000038813,ENSGALG00000009050,ENSGALG00000034716,ENSGALG00000024449,ENSGALG00000033295,ENSGALG00000014463,ENSGALG00000004044,ENSGALG00000014736,ENSGALG00000012735,ENSGALG00000006491,ENSGALG00000002958,ENSGALG00000005292,…
GO:0009790	embryo development	biological_process	4.32e-06	0.00082332	146	2677	552	14096	ENSGALG00000010170,ENSGALG00000000902,ENSGALG00000035237,ENSGALG00000002958,ENSGALG00000009241,ENSGALG00000010974,ENSGALG00000001343,ENSGALG00000005256,ENSGALG00000043428,ENSGALG00000008018,ENSGALG00000010936,ENSGALG00000009129,ENSGALG00000026276,ENSGALG00000005123,ENSGALG00000039200,ENSGALG00000005285,ENSGALG00000012775,ENSGALG00000007932,ENSGALG00000005554,ENSGALG00000002744,ENSGALG00000007681,…
GO:0048705	skeletal system morphogenesis	biological_process	4.49e-06	0.00083808	59	2677	177	14096	ENSGALG00000017183,ENSGALG00000005285,ENSGALG00000031859,ENSGALG00000039200,ENSGALG00000016473,ENSGALG00000009270,ENSGALG00000011347,ENSGALG00000006725,ENSGALG00000000284,ENSGALG00000003588,ENSGALG00000001097,ENSGALG00000040276,ENSGALG00000026276,ENSGALG00000005123,ENSGALG00000041555,ENSGALG00000009129,ENSGALG00000037687,ENSGALG00000006958,ENSGALG00000003283,ENSGALG00000000839,ENSGALG00000005426,…
GO:0042692	muscle cell differentiation	biological_process	5.23e-06	0.00094695	71	2677	228	14096	ENSGALG00000041988,ENSGALG00000009724,ENSGALG00000019719,ENSGALG00000016102,ENSGALG00000034168,ENSGALG00000007539,ENSGALG00000015132,ENSGALG00000004334,ENSGALG00000017235,ENSGALG00000011086,ENSGALG00000003886,ENSGALG00000026081,ENSGALG00000037203,ENSGALG00000005292,ENSGALG00000002958,ENSGALG00000009050,ENSGALG00000034716,ENSGALG00000014736,ENSGALG00000024449,ENSGALG00000014463,ENSGALG00000011404,…
GO:0001655	urogenital system development	biological_process	6.51e-06	0.0011675	69	2677	222	14096	ENSGALG00000007651,ENSGALG00000007324,ENSGALG00000001097,ENSGALG00000032702,ENSGALG00000040834,ENSGALG00000029301,ENSGALG00000015166,ENSGALG00000013193,ENSGALG00000029270,ENSGALG00000043555,ENSGALG00000003114,ENSGALG00000006802,ENSGALG00000007706,ENSGALG00000000839,ENSGALG00000011358,ENSGALG00000008747,ENSGALG00000009690,ENSGALG00000008969,ENSGALG00000005451,ENSGALG00000015593,ENSGALG00000030991,…
GO:1903522	regulation of blood circulation	biological_process	6.86e-06	0.0012164	44	2677	122	14096	ENSGALG00000003163,ENSGALG00000034716,ENSGALG00000029694,ENSGALG00000012913,ENSGALG00000004044,ENSGALG00000012735,ENSGALG00000034895,ENSGALG00000032287,ENSGALG00000012419,ENSGALG00000038787,ENSGALG00000016281,ENSGALG00000015018,ENSGALG00000003521,Novel01675,ENSGALG00000008456,ENSGALG00000010005,ENSGALG00000000585,ENSGALG00000008177,ENSGALG00000012790,ENSGALG00000003588,ENSGALG00000008486,ENSGALG0…
GO:0051216	cartilage development	biological_process	6.93e-06	0.0012172	47	2677	133	14096	Novel00907,ENSGALG00000003137,ENSGALG00000007706,ENSGALG00000003114,ENSGALG00000015015,ENSGALG00000010125,ENSGALG00000037203,ENSGALG00000008135,ENSGALG00000009241,ENSGALG00000011740,ENSGALG00000012735,ENSGALG00000006958,ENSGALG00000005981,ENSGALG00000003283,ENSGALG00000043428,ENSGALG00000008018,ENSGALG00000006725,ENSGALG00000035539,ENSGALG00000041555,ENSGALG00000005123,ENSGALG00000040276,ENSGALG0…
GO:0051963	regulation of synapse assembly	biological_process	7.41e-06	0.0012612	25	2677	56	14096	ENSGALG00000004598,ENSGALG00000040938,ENSGALG00000034168,ENSGALG00000042664,ENSGALG00000015593,ENSGALG00000027355,ENSGALG00000005123,ENSGALG00000002864,ENSGALG00000028682,ENSGALG00000026214,ENSGALG00000019019,ENSGALG00000043209,ENSGALG00000012594,ENSGALG00000011319,ENSGALG00000002707,ENSGALG00000009107,ENSGALG00000009739,ENSGALG00000015967,ENSGALG00000000367,ENSGALG00000008537,ENSGALG00000008716,…
GO:0008015	blood circulation	biological_process	7.53e-06	0.0012612	72	2677	233	14096	ENSGALG00000014684,ENSGALG00000012913,ENSGALG00000034716,ENSGALG00000024449,ENSGALG00000003163,ENSGALG00000003886,ENSGALG00000036360,ENSGALG00000031410,ENSGALG00000012419,ENSGALG00000004334,ENSGALG00000010290,ENSGALG00000041285,ENSGALG00000008456,ENSGALG00000013085,ENSGALG00000005554,ENSGALG00000001459,ENSGALG00000007681,ENSGALG00000016600,ENSGALG00000011404,ENSGALG00000038512,ENSGALG00000003588,…
GO:0072073	kidney epithelium development	biological_process	7.53e-06	0.0012612	40	2677	108	14096	ENSGALG00000006087,ENSGALG00000007668,ENSGALG00000042045,ENSGALG00000015593,ENSGALG00000030991,ENSGALG00000008969,ENSGALG00000039238,ENSGALG00000015466,ENSGALG00000011823,ENSGALG00000036133,ENSGALG00000009724,ENSGALG00000012644,ENSGALG00000006379,ENSGALG00000003473,ENSGALG00000016680,ENSGALG00000040582,ENSGALG00000031255,ENSGALG00000001141,ENSGALG00000011117,ENSGALG00000040834,ENSGALG00000001097,…
GO:0050789	regulation of biological process	biological_process	8.17e-06	0.0013267	1320	2677	6450	14096	ENSGALG00000002086,ENSGALG00000003073,ENSGALG00000006258,ENSGALG00000001153,ENSGALG00000016744,ENSGALG00000007418,ENSGALG00000025748,ENSGALG00000028895,ENSGALG00000002452,ENSGALG00000000608,ENSGALG00000030030,ENSGALG00000008615,ENSGALG00000027247,Novel00670,ENSGALG00000008266,ENSGALG00000030643,Novel01064,ENSGALG00000014994,ENSGALG00000041748,ENSGALG00000003163,ENSGALG00000004221,ENSGALG000000372…
GO:0051146	striated muscle cell differentiation	biological_process	8.25e-06	0.0013267	52	2677	154	14096	ENSGALG00000006379,ENSGALG00000041988,ENSGALG00000009724,ENSGALG00000016102,ENSGALG00000018700,ENSGALG00000006520,ENSGALG00000038364,ENSGALG00000015410,ENSGALG00000031960,ENSGALG00000008351,ENSGALG00000019719,ENSGALG00000009089,ENSGALG00000007539,ENSGALG00000039728,ENSGALG00000038813,ENSGALG00000013624,ENSGALG00000015132,ENSGALG00000015013,ENSGALG00000002958,ENSGALG00000005292,ENSGALG00000018946,…
GO:0065007	biological regulation	biological_process	8.73e-06	0.001385	1388	2677	6810	14096	ENSGALG00000001021,ENSGALG00000011623,ENSGALG00000005309,ENSGALG00000007210,ENSGALG00000013100,ENSGALG00000040926,ENSGALG00000003137,ENSGALG00000001031,ENSGALG00000033520,ENSGALG00000003930,ENSGALG00000006062,ENSGALG00000006112,ENSGALG00000035211,ENSGALG00000013193,ENSGALG00000000604,ENSGALG00000005004,ENSGALG00000030834,ENSGALG00000016565,Novel00178,ENSGALG00000008486,ENSGALG00000014855,Novel003…
GO:0072006	nephron development	biological_process	8.87e-06	0.0013922	37	2677	98	14096	ENSGALG00000010664,ENSGALG00000014496,ENSGALG00000000839,ENSGALG00000011358,ENSGALG00000007706,ENSGALG00000031410,ENSGALG00000006802,ENSGALG00000003114,ENSGALG00000043555,ENSGALG00000029270,ENSGALG00000013193,ENSGALG00000037203,ENSGALG00000029197,ENSGALG00000008028,ENSGALG00000016473,ENSGALG00000005554,ENSGALG00000013085,ENSGALG00000029301,ENSGALG00000040834,ENSGALG00000032702,ENSGALG00000001097,…
GO:0003013	circulatory system process	biological_process	8.93e-06	0.0013922	72	2677	234	14096	ENSGALG00000038512,ENSGALG00000011404,ENSGALG00000016600,ENSGALG00000015117,ENSGALG00000014848,ENSGALG00000010005,ENSGALG00000003588,ENSGALG00000008456,ENSGALG00000041285,ENSGALG00000001459,ENSGALG00000007681,ENSGALG00000005554,ENSGALG00000013085,ENSGALG00000012419,ENSGALG00000004334,ENSGALG00000003886,ENSGALG00000031410,ENSGALG00000036360,ENSGALG00000010290,ENSGALG00000014684,ENSGALG00000003163,…
GO:0030282	bone mineralization	biological_process	9.33e-06	0.0014418	29	2677	69	14096	ENSGALG00000012775,ENSGALG00000030030,ENSGALG00000017183,ENSGALG00000016473,ENSGALG00000014873,ENSGALG00000039200,ENSGALG00000039322,ENSGALG00000029301,ENSGALG00000012964,ENSGALG00000006087,ENSGALG00000007668,ENSGALG00000003863,ENSGALG00000040834,ENSGALG00000040493,ENSGALG00000030969,ENSGALG00000016375,ENSGALG00000041640,ENSGALG00000008601,ENSGALG00000017068,ENSGALG00000005476,ENSGALG00000009638,…
GO:0061436	establishment of skin barrier	biological_process	1.33e-05	0.0020029	8	2677	9	14096	ENSGALG00000038495,ENSGALG00000026862,ENSGALG00000028115,ENSGALG00000016102,ENSGALG00000007324,ENSGALG00000003553,ENSGALG00000004249,ENSGALG00000000902
GO:0048699	generation of neurons	biological_process	1.36e-05	0.0020251	210	2677	859	14096	ENSGALG00000002515,ENSGALG00000004662,ENSGALG00000009302,ENSGALG00000007668,ENSGALG00000001124,ENSGALG00000011319,ENSGALG00000036560,ENSGALG00000015511,ENSGALG00000006424,ENSGALG00000004538,ENSGALG00000017378,ENSGALG00000001690,ENSGALG00000012792,ENSGALG00000003849,ENSGALG00000009157,ENSGALG00000026744,ENSGALG00000004631,ENSGALG00000015132,ENSGALG00000010745,ENSGALG00000004448,ENSGALG00000021567,…
GO:0055002	striated muscle cell development	biological_process	1.46e-05	0.0021577	34	2677	89	14096	ENSGALG00000039728,ENSGALG00000038813,ENSGALG00000013624,ENSGALG00000006520,ENSGALG00000019719,ENSGALG00000009089,ENSGALG00000008351,ENSGALG00000031960,ENSGALG00000015410,ENSGALG00000008805,ENSGALG00000008945,ENSGALG00000010936,ENSGALG00000015018,ENSGALG00000002125,ENSGALG00000006216,ENSGALG00000007367,ENSGALG00000003521,ENSGALG00000001977,ENSGALG00000000044,ENSGALG00000013968,ENSGALG00000005292,…
GO:0043588	skin development	biological_process	1.5e-05	0.0022061	37	2677	100	14096	ENSGALG00000004804,ENSGALG00000028115,ENSGALG00000026862,ENSGALG00000003647,ENSGALG00000011355,ENSGALG00000007324,ENSGALG00000012790,ENSGALG00000031112,ENSGALG00000041555,ENSGALG00000026276,ENSGALG00000003553,ENSGALG00000032702,ENSGALG00000004249,ENSGALG00000014624,ENSGALG00000000839,ENSGALG00000037687,ENSGALG00000026361,ENSGALG00000037203,ENSGALG00000009641,ENSGALG00000000902,ENSGALG00000010170,…
GO:0050807	regulation of synapse organization	biological_process	1.64e-05	0.0023731	29	2677	72	14096	ENSGALG00000008716,ENSGALG00000009971,ENSGALG00000035099,ENSGALG00000003899,ENSGALG00000015967,ENSGALG00000009739,ENSGALG00000008537,ENSGALG00000000367,ENSGALG00000037387,ENSGALG00000026361,ENSGALG00000016941,ENSGALG00000005123,ENSGALG00000027355,ENSGALG00000002864,ENSGALG00000004598,ENSGALG00000040938,ENSGALG00000034168,ENSGALG00000042664,ENSGALG00000015593,ENSGALG00000019019,ENSGALG00000011319,…
GO:0051965	positive regulation of synapse assembly	biological_process	1.71e-05	0.002445	21	2677	45	14096	ENSGALG00000009739,ENSGALG00000015967,ENSGALG00000000367,ENSGALG00000008537,ENSGALG00000008716,ENSGALG00000035099,ENSGALG00000037387,ENSGALG00000026361,ENSGALG00000004598,ENSGALG00000040938,ENSGALG00000042664,ENSGALG00000027355,ENSGALG00000005123,ENSGALG00000002864,ENSGALG00000028682,ENSGALG00000026214,ENSGALG00000019019,ENSGALG00000011319,ENSGALG00000043209,ENSGALG00000012594,ENSGALG00000009107
GO:0001503	ossification	biological_process	1.87e-05	0.002656	74	2677	247	14096	ENSGALG00000009241,ENSGALG00000011957,ENSGALG00000008014,ENSGALG00000037203,ENSGALG00000010170,ENSGALG00000009415,ENSGALG00000008018,ENSGALG00000004336,ENSGALG00000004239,ENSGALG00000007364,ENSGALG00000009129,ENSGALG00000012964,ENSGALG00000010927,ENSGALG00000043460,ENSGALG00000011347,ENSGALG00000042422,ENSGALG00000017183,ENSGALG00000039200,ENSGALG00000016473,ENSGALG00000007932,ENSGALG00000012775,…
GO:0060993	kidney morphogenesis	biological_process	1.9e-05	0.0026845	30	2677	75	14096	ENSGALG00000014944,ENSGALG00000009302,ENSGALG00000001097,ENSGALG00000006087,ENSGALG00000007668,ENSGALG00000042045,ENSGALG00000040834,ENSGALG00000030643,ENSGALG00000030991,ENSGALG00000011823,ENSGALG00000029301,ENSGALG00000039238,ENSGALG00000008028,ENSGALG00000016473,ENSGALG00000015166,ENSGALG00000037203,ENSGALG00000012644,ENSGALG00000013193,ENSGALG00000029270,ENSGALG00000006379,ENSGALG00000043555,…
GO:0042127	regulation of cell proliferation	biological_process	2.13e-05	0.0029848	203	2677	825	14096	ENSGALG00000020067,ENSGALG00000038813,ENSGALG00000005852,ENSGALG00000034970,ENSGALG00000008514,ENSGALG00000003374,ENSGALG00000035016,ENSGALG00000012456,ENSGALG00000038355,ENSGALG00000016954,ENSGALG00000031862,ENSGALG00000023195,ENSGALG00000006379,ENSGALG00000010866,ENSGALG00000001916,ENSGALG00000001141,ENSGALG00000043287,ENSGALG00000001006,ENSGALG00000031255,ENSGALG00000013861,ENSGALG00000007651,…
GO:0002027	regulation of heart rate	biological_process	2.16e-05	0.0030067	23	2677	51	14096	ENSGALG00000010005,ENSGALG00000008486,ENSGALG00000012790,ENSGALG00000003588,ENSGALG00000005332,ENSGALG00000015142,ENSGALG00000004096,ENSGALG00000015018,ENSGALG00000011353,ENSGALG00000002845,ENSGALG00000004376,ENSGALG00000003521,ENSGALG00000027583,ENSGALG00000016281,ENSGALG00000007409,ENSGALG00000043287,ENSGALG00000021272,ENSGALG00000012913,ENSGALG00000034716,ENSGALG00000029694,ENSGALG00000012735,…
GO:0007519	skeletal muscle tissue development	biological_process	2.24e-05	0.0030889	41	2677	116	14096	ENSGALG00000014736,ENSGALG00000033295,ENSGALG00000011291,ENSGALG00000009050,ENSGALG00000042657,ENSGALG00000039458,ENSGALG00000016309,ENSGALG00000006491,ENSGALG00000001021,ENSGALG00000005292,ENSGALG00000002958,ENSGALG00000037203,ENSGALG00000016281,ENSGALG00000011086,ENSGALG00000006273,ENSGALG00000009270,ENSGALG00000006216,ENSGALG00000010881,ENSGALG00000043727,ENSGALG00000015935,ENSGALG00000027069,…
GO:0086009	membrane repolarization	biological_process	2.45e-05	0.0033465	14	2677	24	14096	ENSGALG00000034895,ENSGALG00000008486,ENSGALG00000007666,ENSGALG00000015233,ENSGALG00000007409,ENSGALG00000005332,ENSGALG00000029694,ENSGALG00000004376,ENSGALG00000015018,ENSGALG00000001512,ENSGALG00000043287,ENSGALG00000014873,ENSGALG00000008351,ENSGALG00000009995
GO:0072028	nephron morphogenesis	biological_process	2.49e-05	0.0033778	26	2677	62	14096	ENSGALG00000037203,ENSGALG00000012644,ENSGALG00000013193,ENSGALG00000029270,ENSGALG00000006379,ENSGALG00000043555,ENSGALG00000009724,ENSGALG00000003114,ENSGALG00000007706,ENSGALG00000001141,ENSGALG00000000839,ENSGALG00000011358,ENSGALG00000010664,ENSGALG00000011117,ENSGALG00000031255,ENSGALG00000001097,ENSGALG00000006087,ENSGALG00000042045,ENSGALG00000007668,ENSGALG00000040834,ENSGALG00000030991,…
GO:0060538	skeletal muscle organ development	biological_process	2.84e-05	0.0038234	41	2677	117	14096	ENSGALG00000015410,ENSGALG00000043287,ENSGALG00000005519,ENSGALG00000016102,ENSGALG00000027513,ENSGALG00000006379,ENSGALG00000013624,ENSGALG00000027247,ENSGALG00000038813,ENSGALG00000043433,ENSGALG00000031890,ENSGALG00000006544,ENSGALG00000041640,ENSGALG00000009424,ENSGALG00000025887,ENSGALG00000007539,ENSGALG00000039728,ENSGALG00000001021,ENSGALG00000006491,ENSGALG00000016309,ENSGALG00000039458,…
GO:0009913	epidermal cell differentiation	biological_process	2.93e-05	0.0039088	35	2677	95	14096	ENSGALG00000014624,ENSGALG00000034716,ENSGALG00000037687,ENSGALG00000031997,ENSGALG00000002958,ENSGALG00000029270,ENSGALG00000010170,ENSGALG00000000902,ENSGALG00000002744,ENSGALG00000015145,ENSGALG00000028115,ENSGALG00000004804,ENSGALG00000003647,ENSGALG00000042422,ENSGALG00000012790,ENSGALG00000007324,ENSGALG00000020726,ENSGALG00000003553,ENSGALG00000001141,ENSGALG00000016102,ENSGALG00000024047,…
GO:0045778	positive regulation of ossification	biological_process	3.09e-05	0.00407	27	2677	66	14096	ENSGALG00000014686,ENSGALG00000005981,ENSGALG00000038848,ENSGALG00000009638,ENSGALG00000040180,ENSGALG00000009241,ENSGALG00000006379,ENSGALG00000011957,ENSGALG00000008014,ENSGALG00000037203,ENSGALG00000040035,ENSGALG00000043641,ENSGALG00000043555,ENSGALG00000011347,ENSGALG00000029301,ENSGALG00000039322,ENSGALG00000016473,ENSGALG00000014873,ENSGALG00000005842,ENSGALG00000012775,ENSGALG00000017068,…
GO:0048285	organelle fission	biological_process	3.48e-05	0.004544	85	2677	300	14096	ENSGALG00000008233,ENSGALG00000001491,ENSGALG00000007768,ENSGALG00000038848,ENSGALG00000016102,ENSGALG00000037593,ENSGALG00000004161,ENSGALG00000031524,ENSGALG00000034168,ENSGALG00000007668,ENSGALG00000030313,ENSGALG00000042418,ENSGALG00000019967,Novel01064,Novel02498,ENSGALG00000003126,ENSGALG00000014801,ENSGALG00000033834,ENSGALG00000001632,ENSGALG00000038817,ENSGALG00000043799,ENSGALG000000394…
GO:0050891	multicellular organismal water homeostasis	biological_process	3.54e-05	0.004544	13	2677	22	14096	ENSGALG00000006202,ENSGALG00000038495,ENSGALG00000028115,ENSGALG00000026862,ENSGALG00000016102,ENSGALG00000016680,ENSGALG00000002452,ENSGALG00000007324,ENSGALG00000003553,ENSGALG00000004249,ENSGALG00000000902,ENSGALG00000015128,ENSGALG00000036360
GO:0030182	neuron differentiation	biological_process	3.54e-05	0.004544	190	2677	777	14096	ENSGALG00000030834,ENSGALG00000015152,ENSGALG00000015422,ENSGALG00000003582,ENSGALG00000004598,ENSGALG00000020726,ENSGALG00000001097,ENSGALG00000010053,ENSGALG00000033351,ENSGALG00000000625,ENSGALG00000007114,ENSGALG00000013971,ENSGALG00000011661,ENSGALG00000000839,ENSGALG00000042657,ENSGALG00000039985,ENSGALG00000002804,ENSGALG00000029270,ENSGALG00000008135,ENSGALG00000034895,ENSGALG00000035559,…
GO:0034508	centromere complex assembly	biological_process	3.55e-05	0.004544	13	2677	22	14096	ENSGALG00000028900,ENSGALG00000027454,ENSGALG00000001632,ENSGALG00000015884,ENSGALG00000016609,ENSGALG00000004687,ENSGALG00000014788,ENSGALG00000013494,ENSGALG00000037735,ENSGALG00000015363,ENSGALG00000024481,ENSGALG00000005038,ENSGALG00000005451
GO:0040007	growth	biological_process	3.6e-05	0.0045777	141	2677	549	14096	ENSGALG00000009424,ENSGALG00000030643,ENSGALG00000034168,ENSGALG00000041371,ENSGALG00000010537,ENSGALG00000030030,ENSGALG00000039322,ENSGALG00000015944,ENSGALG00000042199,ENSGALG00000003126,ENSGALG00000026033,ENSGALG00000003282,ENSGALG00000003473,ENSGALG00000040035,ENSGALG00000003285,ENSGALG00000032039,ENSGALG00000025748,ENSGALG00000001079,ENSGALG00000028770,ENSGALG00000038848,ENSGALG00000016034,…
GO:0008544	epidermis development	biological_process	3.71e-05	0.0046363	40	2677	115	14096	ENSGALG00000029270,ENSGALG00000002958,ENSGALG00000000902,ENSGALG00000010170,ENSGALG00000034716,ENSGALG00000014624,ENSGALG00000031997,ENSGALG00000037687,ENSGALG00000007324,ENSGALG00000012790,ENSGALG00000001518,ENSGALG00000041470,ENSGALG00000020726,ENSGALG00000003553,ENSGALG00000004249,ENSGALG00000004804,ENSGALG00000028115,ENSGALG00000015145,ENSGALG00000002744,ENSGALG00000042422,ENSGALG00000011355,…
GO:2000027	regulation of organ morphogenesis	biological_process	3.73e-05	0.0046363	37	2677	103	14096	ENSGALG00000030879,ENSGALG00000009424,ENSGALG00000041640,ENSGALG00000007668,ENSGALG00000006087,ENSGALG00000012973,ENSGALG00000034168,ENSGALG00000030643,ENSGALG00000003767,ENSGALG00000001995,ENSGALG00000011117,ENSGALG00000008609,ENSGALG00000031255,ENSGALG00000003473,ENSGALG00000006379,ENSGALG00000019761,ENSGALG00000009724,ENSGALG00000032039,ENSGALG00000029301,ENSGALG00000011347,ENSGALG00000008028,…
GO:0048589	developmental growth	biological_process	4.1e-05	0.0050643	103	2677	380	14096	ENSGALG00000001006,ENSGALG00000038364,ENSGALG00000005519,ENSGALG00000011562,ENSGALG00000031255,ENSGALG00000004526,ENSGALG00000008609,ENSGALG00000006379,ENSGALG00000001916,ENSGALG00000010874,ENSGALG00000038355,ENSGALG00000013191,ENSGALG00000000364,ENSGALG00000004747,ENSGALG00000014873,ENSGALG00000030879,ENSGALG00000035016,ENSGALG00000002403,ENSGALG00000002210,ENSGALG00000041640,ENSGALG00000032545,…
GO:0035137	hindlimb morphogenesis	biological_process	4.39e-05	0.0053898	17	2677	34	14096	ENSGALG00000030030,ENSGALG00000005285,ENSGALG00000016473,ENSGALG00000015013,ENSGALG00000009270,ENSGALG00000006087,ENSGALG00000005123,ENSGALG00000041640,ENSGALG00000016680,ENSGALG00000038848,ENSGALG00000001079,ENSGALG00000027513,ENSGALG00000032584,ENSGALG00000007706,ENSGALG00000006379,ENSGALG00000038355,ENSGALG00000037203
GO:0070887	cellular response to chemical stimulus	biological_process	4.55e-05	0.0055271	298	2677	1290	14096	Novel01187,ENSGALG00000003045,ENSGALG00000028895,ENSGALG00000028376,ENSGALG00000003472,ENSGALG00000025748,ENSGALG00000000608,ENSGALG00000002112,ENSGALG00000041932,ENSGALG00000010628,ENSGALG00000011823,ENSGALG00000036502,ENSGALG00000015729,ENSGALG00000033051,ENSGALG00000008266,ENSGALG00000014994,ENSGALG00000017179,ENSGALG00000001882,ENSGALG00000013081,ENSGALG00000011219,ENSGALG00000011291,ENSGALG0…
GO:0035136	forelimb morphogenesis	biological_process	4.56e-05	0.0055271	18	2677	37	14096	ENSGALG00000032584,ENSGALG00000001079,ENSGALG00000027513,ENSGALG00000016680,ENSGALG00000038848,ENSGALG00000038355,ENSGALG00000037203,ENSGALG00000006379,ENSGALG00000029140,ENSGALG00000009270,ENSGALG00000015013,ENSGALG00000030030,ENSGALG00000005285,ENSGALG00000016473,ENSGALG00000041640,ENSGALG00000005123,ENSGALG00000039728,ENSGALG00000040276
GO:0007423	sensory organ development	biological_process	4.79e-05	0.0057578	102	2677	376	14096	ENSGALG00000025804,ENSGALG00000029301,ENSGALG00000012594,ENSGALG00000030834,ENSGALG00000031859,ENSGALG00000011355,ENSGALG00000034616,ENSGALG00000033351,ENSGALG00000031112,ENSGALG00000009755,ENSGALG00000020726,ENSGALG00000002831,ENSGALG00000011270,ENSGALG00000002298,ENSGALG00000011358,ENSGALG00000042657,ENSGALG00000008747,ENSGALG00000012735,ENSGALG00000029270,ENSGALG00000007706,ENSGALG00000043355,…
GO:0060028	convergent extension involved in axis elongation	biological_process	4.94e-05	0.005905	6	2677	6	14096	ENSGALG00000003767,ENSGALG00000030643,ENSGALG00000034168,ENSGALG00000003473,ENSGALG00000009241,ENSGALG00000000839
GO:0050794	regulation of cellular process	biological_process	4.99e-05	0.005917	1245	2677	6107	14096	ENSGALG00000004074,ENSGALG00000032545,Novel01534,ENSGALG00000021542,ENSGALG00000008896,ENSGALG00000008346,ENSGALG00000003374,ENSGALG00000000783,ENSGALG00000012644,ENSGALG00000007980,Novel03068,ENSGALG00000007931,ENSGALG00000037453,ENSGALG00000008439,ENSGALG00000003323,Novel00689,ENSGALG00000041555,ENSGALG00000007511,ENSGALG00000012790,ENSGALG00000032702,ENSGALG00000032150,ENSGALG00000012712,ENSGA…
GO:0072001	renal system development	biological_process	5.29e-05	0.0062394	59	2677	193	14096	ENSGALG00000006379,ENSGALG00000003473,ENSGALG00000012644,ENSGALG00000010163,ENSGALG00000009724,ENSGALG00000014227,ENSGALG00000036133,ENSGALG00000001141,ENSGALG00000011117,ENSGALG00000040582,ENSGALG00000016680,ENSGALG00000031255,ENSGALG00000009302,ENSGALG00000008969,ENSGALG00000009690,ENSGALG00000007668,ENSGALG00000042045,ENSGALG00000006087,ENSGALG00000030991,ENSGALG00000030643,ENSGALG00000015593,…
GO:0033561	regulation of water loss via skin	biological_process	5.35e-05	0.006267	8	2677	10	14096	ENSGALG00000007324,ENSGALG00000000902,ENSGALG00000004249,ENSGALG00000003553,ENSGALG00000026862,ENSGALG00000016102,ENSGALG00000028115,ENSGALG00000038495
GO:0098742	cell-cell adhesion via plasma-membrane adhesion molecules	biological_process	5.54e-05	0.006442	32	2677	88	14096	ENSGALG00000015519,ENSGALG00000005483,ENSGALG00000029197,Novel02911,ENSGALG00000007114,ENSGALG00000016934,ENSGALG00000016941,ENSGALG00000017229,ENSGALG00000006527,ENSGALG00000009719,ENSGALG00000026862,ENSGALG00000004320,ENSGALG00000005554,ENSGALG00000029301,ENSGALG00000022557,ENSGALG00000002744,ENSGALG00000031895,ENSGALG00000015395,ENSGALG00000000608,ENSGALG00000003285,ENSGALG00000015140,ENSGALG0…
GO:0072088	nephron epithelium morphogenesis	biological_process	5.61e-05	0.0064833	25	2677	61	14096	ENSGALG00000008028,ENSGALG00000016473,ENSGALG00000039238,ENSGALG00000029301,ENSGALG00000011823,ENSGALG00000042045,ENSGALG00000006087,ENSGALG00000030991,ENSGALG00000040834,ENSGALG00000001097,ENSGALG00000031255,ENSGALG00000000839,ENSGALG00000001141,ENSGALG00000011358,ENSGALG00000011117,ENSGALG00000010664,ENSGALG00000043555,ENSGALG00000009724,ENSGALG00000007706,ENSGALG00000003114,ENSGALG00000037203,…
GO:0045333	cellular respiration	biological_process	5.69e-05	0.0065324	33	2677	89	14096	ENSGALG00000032544,ENSGALG00000005095,ENSGALG00000007931,ENSGALG00000037593,ENSGALG00000008066,ENSGALG00000013191,ENSGALG00000011950,ENSGALG00000042851,Novel03197,ENSGALG00000010614,ENSGALG00000014155,ENSGALG00000008606,ENSGALG00000015961,ENSGALG00000036214,ENSGALG00000008821,ENSGALG00000001375,ENSGALG00000019967,ENSGALG00000001184,ENSGALG00000011661,ENSGALG00000013568,ENSGALG00000036360,ENSGALG0…
GO:0072009	nephron epithelium development	biological_process	6.3e-05	0.0071509	31	2677	83	14096	ENSGALG00000037203,ENSGALG00000013193,ENSGALG00000012644,ENSGALG00000006379,ENSGALG00000029270,ENSGALG00000036133,ENSGALG00000009724,ENSGALG00000043555,ENSGALG00000003114,ENSGALG00000006802,ENSGALG00000007706,ENSGALG00000000839,ENSGALG00000001141,ENSGALG00000011358,ENSGALG00000014496,ENSGALG00000010664,ENSGALG00000011117,ENSGALG00000016680,ENSGALG00000031255,ENSGALG00000001097,ENSGALG00000006087,…
GO:0043583	ear development	biological_process	6.43e-05	0.0072485	51	2677	160	14096	ENSGALG00000002744,ENSGALG00000029301,ENSGALG00000043460,ENSGALG00000015145,ENSGALG00000001449,ENSGALG00000012775,ENSGALG00000031859,ENSGALG00000030834,ENSGALG00000016473,ENSGALG00000009129,ENSGALG00000026276,ENSGALG00000033351,ENSGALG00000020726,ENSGALG00000004249,ENSGALG00000009755,ENSGALG00000029392,ENSGALG00000042657,ENSGALG00000034716,ENSGALG00000012735,ENSGALG00000008747,ENSGALG00000010974,…
GO:0030856	regulation of epithelial cell differentiation	biological_process	6.51e-05	0.0072911	31	2677	83	14096	ENSGALG00000000902,ENSGALG00000003114,ENSGALG00000004794,ENSGALG00000029270,ENSGALG00000003282,ENSGALG00000037203,ENSGALG00000015910,ENSGALG00000037687,ENSGALG00000031997,ENSGALG00000038848,ENSGALG00000008702,ENSGALG00000018503,ENSGALG00000038495,ENSGALG00000034716,ENSGALG00000024047,ENSGALG00000014496,ENSGALG00000005981,ENSGALG00000001141,ENSGALG00000043287,ENSGALG00000013793,ENSGALG00000008701,…
GO:0061326	renal tubule development	biological_process	6.69e-05	0.0074516	29	2677	76	14096	ENSGALG00000011823,ENSGALG00000029301,ENSGALG00000016473,ENSGALG00000008028,ENSGALG00000036798,ENSGALG00000007651,ENSGALG00000001097,ENSGALG00000006087,ENSGALG00000042045,ENSGALG00000040834,ENSGALG00000030991,ENSGALG00000000839,ENSGALG00000011358,ENSGALG00000001141,ENSGALG00000014496,ENSGALG00000011117,ENSGALG00000010664,ENSGALG00000016680,ENSGALG00000031255,ENSGALG00000037203,ENSGALG00000013193,…
GO:0042471	ear morphogenesis	biological_process	6.75e-05	0.0074665	34	2677	94	14096	ENSGALG00000023195,ENSGALG00000025748,ENSGALG00000010935,ENSGALG00000039170,ENSGALG00000003324,ENSGALG00000035157,ENSGALG00000008609,ENSGALG00000032790,ENSGALG00000016707,ENSGALG00000042308,ENSGALG00000030643,ENSGALG00000034168,ENSGALG00000039238,ENSGALG00000015013,ENSGALG00000029270,ENSGALG00000002958,ENSGALG00000010974,ENSGALG00000007706,ENSGALG00000043355,ENSGALG00000003114,ENSGALG00000004978,…
GO:0001822	kidney development	biological_process	6.91e-05	0.0075545	56	2677	182	14096	ENSGALG00000001141,ENSGALG00000011117,ENSGALG00000040582,ENSGALG00000016680,ENSGALG00000031255,ENSGALG00000003473,ENSGALG00000006379,ENSGALG00000012644,ENSGALG00000014227,ENSGALG00000009724,ENSGALG00000036133,ENSGALG00000011823,ENSGALG00000012178,ENSGALG00000015466,ENSGALG00000039238,ENSGALG00000035016,ENSGALG00000009302,ENSGALG00000008969,ENSGALG00000009690,ENSGALG00000042045,ENSGALG00000007668,…
GO:0007416	synapse assembly	biological_process	7.07e-05	0.007678	29	2677	77	14096	ENSGALG00000037387,ENSGALG00000026361,ENSGALG00000009739,ENSGALG00000015967,ENSGALG00000008537,ENSGALG00000000367,ENSGALG00000008716,ENSGALG00000029197,ENSGALG00000035099,ENSGALG00000003899,ENSGALG00000015132,ENSGALG00000031895,ENSGALG00000015422,ENSGALG00000028682,ENSGALG00000026214,ENSGALG00000019019,ENSGALG00000012594,ENSGALG00000043209,ENSGALG00000011319,ENSGALG00000002707,ENSGALG00000009107,…
GO:0061333	renal tubule morphogenesis	biological_process	7.43e-05	0.0079416	25	2677	62	14096	ENSGALG00000011823,ENSGALG00000029301,ENSGALG00000016473,ENSGALG00000001097,ENSGALG00000036798,ENSGALG00000040834,ENSGALG00000030991,ENSGALG00000006087,ENSGALG00000042045,ENSGALG00000010664,ENSGALG00000011117,ENSGALG00000001141,ENSGALG00000000839,ENSGALG00000011358,ENSGALG00000031255,ENSGALG00000013193,ENSGALG00000012644,ENSGALG00000010163,ENSGALG00000029270,ENSGALG00000006379,ENSGALG00000037203,…
GO:0044057	regulation of system process	biological_process	7.44e-05	0.0079416	71	2677	243	14096	ENSGALG00000000364,ENSGALG00000007409,ENSGALG00000001416,ENSGALG00000008351,ENSGALG00000015410,ENSGALG00000004526,Novel01312,ENSGALG00000011117,ENSGALG00000043287,ENSGALG00000040938,ENSGALG00000006572,ENSGALG00000014873,ENSGALG00000014984,ENSGALG00000014144,ENSGALG00000000949,ENSGALG00000004376,ENSGALG00000016281,ENSGALG00000038787,ENSGALG00000006273,ENSGALG00000043555,ENSGALG00000032287,ENSGALG0…
GO:0022008	neurogenesis	biological_process	7.44e-05	0.0079416	219	2677	924	14096	ENSGALG00000032790,ENSGALG00000013822,ENSGALG00000043480,ENSGALG00000006258,ENSGALG00000041203,ENSGALG00000016744,ENSGALG00000001079,ENSGALG00000007448,ENSGALG00000003472,ENSGALG00000000894,ENSGALG00000026033,ENSGALG00000003473,ENSGALG00000015944,ENSGALG00000003126,ENSGALG00000042199,ENSGALG00000030030,ENSGALG00000011823,ENSGALG00000027247,ENSGALG00000031122,ENSGALG00000041371,ENSGALG00000034168,…
GO:0060048	cardiac muscle contraction	biological_process	7.61e-05	0.0080734	24	2677	58	14096	ENSGALG00000008351,ENSGALG00000042744,ENSGALG00000004044,ENSGALG00000012913,ENSGALG00000021272,ENSGALG00000029694,ENSGALG00000043287,ENSGALG00000016281,ENSGALG00000007409,ENSGALG00000000364,ENSGALG00000001416,ENSGALG00000041285,ENSGALG00000027583,ENSGALG00000004370,ENSGALG00000003521,ENSGALG00000004376,ENSGALG00000015018,ENSGALG00000001459,ENSGALG00000002845,ENSGALG00000015142,ENSGALG00000015233,…
GO:0000280	nuclear division	biological_process	8.18e-05	0.0086275	77	2677	272	14096	ENSGALG00000008584,ENSGALG00000031427,ENSGALG00000012178,ENSGALG00000015013,ENSGALG00000011715,ENSGALG00000017128,ENSGALG00000003438,ENSGALG00000000516,ENSGALG00000006186,ENSGALG00000012155,ENSGALG00000009854,ENSGALG00000011967,ENSGALG00000027871,ENSGALG00000016954,ENSGALG00000003503,ENSGALG00000008095,ENSGALG00000037453,ENSGALG00000031606,ENSGALG00000005411,ENSGALG00000041923,ENSGALG00000015691,…
GO:0008283	cell proliferation	biological_process	8.89e-05	0.0092666	244	2677	1038	14096	ENSGALG00000043433,ENSGALG00000043603,ENSGALG00000001405,ENSGALG00000005451,ENSGALG00000006480,ENSGALG00000011668,ENSGALG00000008969,ENSGALG00000041640,ENSGALG00000039728,ENSGALG00000015013,ENSGALG00000012178,ENSGALG00000030879,ENSGALG00000014984,ENSGALG00000000516,ENSGALG00000036255,ENSGALG00000001028,ENSGALG00000002781,ENSGALG00000002707,ENSGALG00000011657,ENSGALG00000000949,ENSGALG00000012155,…
GO:0051049	regulation of transport	biological_process	9.33e-05	0.009598	229	2677	971	14096	ENSGALG00000008177,ENSGALG00000013616,ENSGALG00000008486,ENSGALG00000004594,ENSGALG00000011238,ENSGALG00000040834,ENSGALG00000015233,ENSGALG00000027771,ENSGALG00000015884,ENSGALG00000025788,ENSGALG00000028115,ENSGALG00000003911,ENSGALG00000003833,ENSGALG00000033271,ENSGALG00000035559,ENSGALG00000004809,ENSGALG00000002990,ENSGALG00000000604,ENSGALG00000034895,ENSGALG00000029270,ENSGALG00000032287,…
GO:0042221	response to chemical	biological_process	9.37e-05	0.009598	399	2677	1797	14096	ENSGALG00000023193,ENSGALG00000041808,ENSGALG00000035052,ENSGALG00000011355,ENSGALG00000003521,ENSGALG00000014297,ENSGALG00000012594,ENSGALG00000019019,ENSGALG00000029301,ENSGALG00000015128,ENSGALG00000041470,ENSGALG00000032702,ENSGALG00000031112,ENSGALG00000034616,ENSGALG00000030002,ENSGALG00000041555,ENSGALG00000007651,ENSGALG00000010357,ENSGALG00000007511,ENSGALG00000008554,Novel00302,ENSGALG0…
GO:0007399	nervous system development	biological_process	9.79e-05	0.0098951	286	2677	1251	14096	ENSGALG00000006258,ENSGALG00000013822,ENSGALG00000041203,ENSGALG00000003045,ENSGALG00000016744,ENSGALG00000025748,ENSGALG00000003472,ENSGALG00000007466,ENSGALG00000009739,ENSGALG00000034458,ENSGALG00000030030,ENSGALG00000011823,ENSGALG00000027247,ENSGALG00000031122,ENSGALG00000033051,ENSGALG00000015729,ENSGALG00000042664,ENSGALG00000030643,ENSGALG00000013081,ENSGALG00000028302,ENSGALG00000013640,…
GO:0050679	positive regulation of epithelial cell proliferation	biological_process	9.79e-05	0.0098951	31	2677	84	14096	ENSGALG00000033295,ENSGALG00000042657,ENSGALG00000005981,ENSGALG00000014804,ENSGALG00000031255,ENSGALG00000023195,ENSGALG00000006379,ENSGALG00000005483,ENSGALG00000003473,ENSGALG00000010290,ENSGALG00000010859,ENSGALG00000037203,ENSGALG00000003114,ENSGALG00000009875,ENSGALG00000013568,ENSGALG00000025748,ENSGALG00000007681,ENSGALG00000029301,ENSGALG00000016473,ENSGALG00000012178,ENSGALG00000003374,…
GO:0030278	regulation of ossification	biological_process	9.83e-05	0.0098951	43	2677	130	14096	ENSGALG00000007324,ENSGALG00000017068,ENSGALG00000033351,ENSGALG00000040276,ENSGALG00000042422,ENSGALG00000016473,ENSGALG00000039200,ENSGALG00000005842,ENSGALG00000012775,ENSGALG00000012964,ENSGALG00000011347,ENSGALG00000029301,ENSGALG00000003114,ENSGALG00000010170,ENSGALG00000003137,ENSGALG00000009415,ENSGALG00000043555,ENSGALG00000009241,ENSGALG00000011957,ENSGALG00000008014,ENSGALG00000037203,…
GO:0043292	contractile fiber	cellular_component	1.6e-13	4.05e-10	57	2677	117	14096	ENSGALG00000009433,ENSGALG00000006520,ENSGALG00000008914,ENSGALG00000009089,ENSGALG00000041202,ENSGALG00000019719,ENSGALG00000013822,ENSGALG00000005207,ENSGALG00000011991,ENSGALG00000019157,ENSGALG00000007539,ENSGALG00000038813,ENSGALG00000035845,ENSGALG00000011278,ENSGALG00000005493,ENSGALG00000008864,ENSGALG00000011994,ENSGALG00000007048,ENSGALG00000006572,ENSGALG00000014873,ENSGALG00000006591,…
GO:0030016	myofibril	cellular_component	1.81e-13	4.05e-10	55	2677	111	14096	ENSGALG00000027330,ENSGALG00000008177,ENSGALG00000000585,ENSGALG00000008805,ENSGALG00000006835,ENSGALG00000001926,ENSGALG00000008945,ENSGALG00000007945,ENSGALG00000005332,ENSGALG00000030247,ENSGALG00000002125,ENSGALG00000001459,ENSGALG00000015018,ENSGALG00000003521,ENSGALG00000006216,ENSGALG00000002907,ENSGALG00000014847,ENSGALG00000013244,ENSGALG00000001977,ENSGALG00000041043,ENSGALG00000006591,…
GO:0044449	contractile fiber part	cellular_component	2.23e-12	4e-09	50	2677	101	14096	ENSGALG00000007048,ENSGALG00000006572,ENSGALG00000011994,ENSGALG00000008864,ENSGALG00000005493,ENSGALG00000038813,ENSGALG00000035845,ENSGALG00000011278,ENSGALG00000007539,ENSGALG00000005207,ENSGALG00000011991,ENSGALG00000019157,ENSGALG00000013822,ENSGALG00000019719,ENSGALG00000041202,ENSGALG00000009089,ENSGALG00000009433,ENSGALG00000013244,ENSGALG00000001977,ENSGALG00000014847,ENSGALG00000001459,…
GO:0030017	sarcomere	cellular_component	1.08e-11	1.49e-08	47	2677	95	14096	ENSGALG00000009433,ENSGALG00000041202,ENSGALG00000009089,ENSGALG00000019719,ENSGALG00000013822,ENSGALG00000011991,ENSGALG00000005207,ENSGALG00000019157,ENSGALG00000007539,ENSGALG00000011278,ENSGALG00000035845,ENSGALG00000038813,ENSGALG00000005493,ENSGALG00000011994,ENSGALG00000006572,ENSGALG00000037203,ENSGALG00000006591,ENSGALG00000005292,ENSGALG00000016342,ENSGALG00000011811,ENSGALG00000011306,…
GO:0044459	plasma membrane part	cellular_component	1.31e-11	1.68e-08	324	2677	1245	14096	ENSGALG00000017136,ENSGALG00000010859,ENSGALG00000010098,ENSGALG00000028871,ENSGALG00000032602,ENSGALG00000041380,ENSGALG00000035387,ENSGALG00000015542,ENSGALG00000029020,ENSGALG00000026499,ENSGALG00000014975,ENSGALG00000027305,ENSGALG00000004096,ENSGALG00000005332,ENSGALG00000015079,ENSGALG00000023411,ENSGALG00000034427,ENSGALG00000003647,ENSGALG00000015395,ENSGALG00000037841,ENSGALG00000002160,…
GO:0098797	plasma membrane protein complex	cellular_component	4.35e-09	3.12e-06	96	2677	293	14096	ENSGALG00000014754,ENSGALG00000012142,ENSGALG00000008593,ENSGALG00000013081,ENSGALG00000033932,ENSGALG00000009919,ENSGALG00000015441,ENSGALG00000015132,ENSGALG00000034621,ENSGALG00000006220,ENSGALG00000003472,ENSGALG00000000608,Novel02414,ENSGALG00000009368,ENSGALG00000021272,ENSGALG00000005400,ENSGALG00000011009,ENSGALG00000007418,ENSGALG00000041900,ENSGALG00000042153,Novel00061,ENSGALG000000084…
GO:0031674	I band	cellular_component	2.66e-08	1.51e-05	31	2677	62	14096	ENSGALG00000001926,ENSGALG00000008945,ENSGALG00000007539,ENSGALG00000008177,ENSGALG00000005207,ENSGALG00000027330,ENSGALG00000011991,ENSGALG00000005493,ENSGALG00000011278,ENSGALG00000005332,ENSGALG00000035845,ENSGALG00000007945,ENSGALG00000015018,ENSGALG00000001977,ENSGALG00000011994,ENSGALG00000005292,ENSGALG00000009433,ENSGALG00000011306,ENSGALG00000011811,ENSGALG00000037203,ENSGALG00000016281,…
GO:0005578	proteinaceous extracellular matrix	cellular_component	2.7e-08	1.51e-05	69	2677	195	14096	ENSGALG00000027471,ENSGALG00000008141,ENSGALG00000013081,ENSGALG00000006087,ENSGALG00000034168,ENSGALG00000008266,ENSGALG00000039219,ENSGALG00000004538,ENSGALG00000003473,ENSGALG00000030647,ENSGALG00000016843,ENSGALG00000005180,ENSGALG00000028627,ENSGALG00000014965,ENSGALG00000034119,ENSGALG00000014686,ENSGALG00000001079,ENSGALG00000026080,ENSGALG00000014615,ENSGALG00000005347,ENSGALG00000006258,…
GO:0005615	extracellular space	cellular_component	3.49e-08	1.84e-05	185	2677	679	14096	ENSGALG00000001565,ENSGALG00000004252,ENSGALG00000001234,ENSGALG00000015917,ENSGALG00000011715,ENSGALG00000036447,ENSGALG00000014603,ENSGALG00000005811,ENSGALG00000000364,ENSGALG00000037050,ENSGALG00000038355,ENSGALG00000010866,ENSGALG00000002160,ENSGALG00000006379,ENSGALG00000001916,ENSGALG00000008734,Novel00689,ENSGALG00000031255,ENSGALG00000021025,Novel01536,ENSGALG00000011117,ENSGALG000000159…
GO:0071944	cell periphery	cellular_component	8.11e-08	3.63e-05	530	2677	2347	14096	ENSGALG00000033535,ENSGALG00000011614,ENSGALG00000010145,ENSGALG00000008969,ENSGALG00000004721,ENSGALG00000012298,ENSGALG00000016448,ENSGALG00000009107,ENSGALG00000004376,ENSGALG00000013741,ENSGALG00000017091,ENSGALG00000008351,ENSGALG00000015410,ENSGALG00000036782,ENSGALG00000014695,ENSGALG00000009719,ENSGALG00000015233,ENSGALG00000012454,ENSGALG00000003582,ENSGALG00000003911,ENSGALG00000041826,…
GO:0005887	integral component of plasma membrane	cellular_component	8.91e-08	3.9e-05	185	2677	699	14096	ENSGALG00000011219,ENSGALG00000027793,ENSGALG00000000394,ENSGALG00000033002,ENSGALG00000027415,ENSGALG00000040561,ENSGALG00000029842,ENSGALG00000004239,ENSGALG00000001512,ENSGALG00000010204,Novel00714,ENSGALG00000013528,ENSGALG00000013200,ENSGALG00000002088,ENSGALG00000002982,ENSGALG00000039403,ENSGALG00000015117,ENSGALG00000012021,ENSGALG00000004373,ENSGALG00000005476,ENSGALG00000011009,ENSGALG0…
GO:0031226	intrinsic component of plasma membrane	cellular_component	1.08e-07	4.51e-05	191	2677	728	14096	ENSGALG00000029392,ENSGALG00000016607,ENSGALG00000010949,ENSGALG00000006527,ENSGALG00000013244,ENSGALG00000008960,ENSGALG00000016590,ENSGALG00000007932,ENSGALG00000012964,ENSGALG00000034025,ENSGALG00000014835,ENSGALG00000005995,ENSGALG00000007681,ENSGALG00000014749,Novel01050,ENSGALG00000014891,ENSGALG00000007646,ENSGALG00000005083,ENSGALG00000001645,ENSGALG00000005256,ENSGALG00000043764,ENSGALG0…
GO:0005886	plasma membrane	cellular_component	1.25e-07	5e-05	509	2677	2251	14096	ENSGALG00000002708,ENSGALG00000001949,ENSGALG00000005483,ENSGALG00000010595,ENSGALG00000014684,ENSGALG00000000394,ENSGALG00000027793,ENSGALG00000033510,ENSGALG00000004239,ENSGALG00000001512,ENSGALG00000009050,ENSGALG00000040561,ENSGALG00000033002,ENSGALG00000024449,ENSGALG00000014463,ENSGALG00000002982,ENSGALG00000038512,ENSGALG00000002028,ENSGALG00000042354,ENSGALG00000014848,ENSGALG00000006175,…
GO:1902495	transmembrane transporter complex	cellular_component	1.49e-07	5.6e-05	63	2677	179	14096	ENSGALG00000005822,ENSGALG00000027415,ENSGALG00000037744,ENSGALG00000001512,ENSGALG00000043764,ENSGALG00000029502,ENSGALG00000027793,ENSGALG00000009638,ENSGALG00000034895,ENSGALG00000010204,ENSGALG00000005215,ENSGALG00000006112,ENSGALG00000004980,ENSGALG00000001645,ENSGALG00000025788,ENSGALG00000034427,ENSGALG00000006202,ENSGALG00000016565,ENSGALG00000038087,ENSGALG00000003911,ENSGALG00000013244,…
GO:0016529	sarcoplasmic reticulum	cellular_component	1.62e-07	5.72e-05	16	2677	23	14096	ENSGALG00000015018,ENSGALG00000039712,ENSGALG00000009995,ENSGALG00000034458,ENSGALG00000027583,ENSGALG00000008177,ENSGALG00000014848,ENSGALG00000008486,ENSGALG00000035845,ENSGALG00000008701,ENSGALG00000038813,ENSGALG00000017168,ENSGALG00000001564,ENSGALG00000014804,ENSGALG00000011811,ENSGALG00000032287
GO:0034702	ion channel complex	cellular_component	2.2e-07	7.17e-05	57	2677	158	14096	ENSGALG00000007409,ENSGALG00000034109,ENSGALG00000006220,ENSGALG00000011005,ENSGALG00000007980,ENSGALG00000003472,ENSGALG00000007666,ENSGALG00000010029,ENSGALG00000016707,ENSGALG00000021272,ENSGALG00000005400,ENSGALG00000011009,ENSGALG00000041900,ENSGALG00000012142,ENSGALG00000026940,ENSGALG00000013081,ENSGALG00000009919,ENSGALG00000004074,ENSGALG00000011715,ENSGALG00000035799,ENSGALG00000015551,…
GO:0016528	sarcoplasm	cellular_component	2.57e-07	8.08e-05	17	2677	26	14096	ENSGALG00000039712,ENSGALG00000015018,ENSGALG00000027583,ENSGALG00000034458,ENSGALG00000009995,ENSGALG00000008486,ENSGALG00000014848,ENSGALG00000008177,ENSGALG00000017168,ENSGALG00000008701,ENSGALG00000038813,ENSGALG00000035845,ENSGALG00000001564,ENSGALG00000014804,ENSGALG00000006258,ENSGALG00000011811,ENSGALG00000032287
GO:1990351	transporter complex	cellular_component	3.83e-07	0.00010891	63	2677	183	14096	Novel01993,ENSGALG00000008456,ENSGALG00000003833,ENSGALG00000013244,ENSGALG00000003911,ENSGALG00000038087,ENSGALG00000006202,ENSGALG00000016565,ENSGALG00000034427,ENSGALG00000025788,ENSGALG00000005332,ENSGALG00000015233,ENSGALG00000027771,ENSGALG00000029392,ENSGALG00000005789,ENSGALG00000009405,ENSGALG00000008486,ENSGALG00000009638,ENSGALG00000027793,ENSGALG00000029502,ENSGALG00000001512,ENSGALG0…
GO:0030018	Z disc	cellular_component	1.38e-06	0.00032652	26	2677	55	14096	ENSGALG00000041202,ENSGALG00000026452,ENSGALG00000009089,ENSGALG00000019719,ENSGALG00000014463,ENSGALG00000004044,ENSGALG00000014995,ENSGALG00000031826,ENSGALG00000016281,ENSGALG00000009433,ENSGALG00000011811,ENSGALG00000011306,ENSGALG00000037203,ENSGALG00000001977,ENSGALG00000011994,ENSGALG00000015018,ENSGALG00000005493,ENSGALG00000005332,ENSGALG00000035845,ENSGALG00000007945,ENSGALG00000001926,…
GO:0031224	intrinsic component of membrane	cellular_component	2.34e-06	0.00049401	709	2677	3264	14096	ENSGALG00000008066,ENSGALG00000016562,ENSGALG00000012055,ENSGALG00000012886,ENSGALG00000004523,ENSGALG00000005095,ENSGALG00000037593,ENSGALG00000011813,ENSGALG00000015142,ENSGALG00000013060,ENSGALG00000013709,ENSGALG00000038559,ENSGALG00000004660,ENSGALG00000016803,ENSGALG00000015754,ENSGALG00000001690,ENSGALG00000012260,ENSGALG00000016896,ENSGALG00000024122,ENSGALG00000005599,ENSGALG00000010707,…
GO:0044420	extracellular matrix component	cellular_component	2.42e-06	0.00050511	32	2677	77	14096	ENSGALG00000041555,ENSGALG00000011200,ENSGALG00000036798,ENSGALG00000031112,ENSGALG00000011406,ENSGALG00000003582,ENSGALG00000010259,ENSGALG00000006725,ENSGALG00000016300,ENSGALG00000010927,ENSGALG00000001343,ENSGALG00000009641,ENSGALG00000043555,ENSGALG00000016584,ENSGALG00000006802,ENSGALG00000005426,ENSGALG00000014804,ENSGALG00000006958,ENSGALG00000013081,ENSGALG00000027471,ENSGALG00000008141,…
GO:0005581	collagen trimer	cellular_component	3.04e-06	0.00061811	21	2677	41	14096	ENSGALG00000002298,ENSGALG00000002546,ENSGALG00000002507,ENSGALG00000015970,ENSGALG00000006958,Novel00662,ENSGALG00000016843,ENSGALG00000009641,ENSGALG00000005253,ENSGALG00000014965,ENSGALG00000005180,ENSGALG00000005554,ENSGALG00000006864,ENSGALG00000027526,ENSGALG00000041555,ENSGALG00000005628,ENSGALG00000036798,ENSGALG00000031112,ENSGALG00000008141,ENSGALG00000021569,ENSGALG00000008266
GO:0016021	integral component of membrane	cellular_component	4.46e-06	0.00083808	697	2677	3215	14096	ENSGALG00000000003,ENSGALG00000013200,ENSGALG00000000558,Novel01945,ENSGALG00000021620,ENSGALG00000002088,ENSGALG00000014221,ENSGALG00000003972,ENSGALG00000026316,ENSGALG00000009596,Novel01202,ENSGALG00000011219,ENSGALG00000016164,ENSGALG00000000141,Novel01579,ENSGALG00000030871,ENSGALG00000003886,ENSGALG00000017237,ENSGALG00000010204,ENSGALG00000002112,ENSGALG00000028225,Novel00740,ENSGALG000000…
GO:0034703	cation channel complex	cellular_component	4.78e-06	0.00088296	39	2677	103	14096	ENSGALG00000003833,ENSGALG00000013244,ENSGALG00000008456,Novel01993,ENSGALG00000025788,ENSGALG00000006202,ENSGALG00000034427,ENSGALG00000027771,ENSGALG00000005332,ENSGALG00000008486,ENSGALG00000027793,ENSGALG00000005822,ENSGALG00000043764,ENSGALG00000037744,ENSGALG00000001512,ENSGALG00000004980,ENSGALG00000006112,ENSGALG00000001645,ENSGALG00000010204,ENSGALG00000034895,ENSGALG00000005215,ENSGALG0…
GO:0031012	extracellular matrix	cellular_component	4.84e-06	0.00088422	96	2677	332	14096	ENSGALG00000006864,ENSGALG00000017183,Novel01843,ENSGALG00000016300,ENSGALG00000010927,ENSGALG00000011406,ENSGALG00000009920,ENSGALG00000010259,ENSGALG00000011200,ENSGALG00000036798,ENSGALG00000005123,ENSGALG00000009568,ENSGALG00000001926,ENSGALG00000041471,ENSGALG00000005426,ENSGALG00000009415,ENSGALG00000016584,Novel02502,ENSGALG00000001343,ENSGALG00000010657,ENSGALG00000011269,ENSGALG000000185…
GO:0000775	chromosome, centromeric region	cellular_component	7.02e-06	0.0012207	42	2677	116	14096	ENSGALG00000011281,ENSGALG00000016609,Novel00087,ENSGALG00000013494,ENSGALG00000013086,ENSGALG00000010120,ENSGALG00000009722,ENSGALG00000036892,ENSGALG00000011914,ENSGALG00000012160,ENSGALG00000024481,ENSGALG00000008014,ENSGALG00000043799,ENSGALG00000006110,ENSGALG00000015884,ENSGALG00000015874,ENSGALG00000027454,ENSGALG00000028900,Novel03288,ENSGALG00000004515,ENSGALG00000037735,ENSGALG000000153…
GO:0000779	condensed chromosome, centromeric region	cellular_component	8.2e-06	0.0013267	17	2677	31	14096	ENSGALG00000036892,ENSGALG00000014788,ENSGALG00000010900,ENSGALG00000037735,ENSGALG00000006110,ENSGALG00000024481,ENSGALG00000008014,ENSGALG00000007768,ENSGALG00000001491,ENSGALG00000008233,ENSGALG00000017128,ENSGALG00000028900,ENSGALG00000027454,ENSGALG00000001632,ENSGALG00000014801,Novel03288,Novel01064
GO:0014704	intercalated disc	cellular_component	1.06e-05	0.0016148	15	2677	26	14096	ENSGALG00000014873,ENSGALG00000015132,ENSGALG00000008914,ENSGALG00000012913,ENSGALG00000014995,ENSGALG00000006508,ENSGALG00000002845,ENSGALG00000002198,ENSGALG00000015142,ENSGALG00000015233,ENSGALG00000007409,ENSGALG00000034895,ENSGALG00000011306,ENSGALG00000012790,ENSGALG00000037203
GO:0042611	MHC protein complex	cellular_component	1.55e-05	0.0022541	10	2677	13	14096	ENSGALG00000032602,ENSGALG00000000141,ENSGALG00000041380,ENSGALG00000038393,ENSGALG00000000162,ENSGALG00000002160,ENSGALG00000033680,Novel02414,ENSGALG00000033932,ENSGALG00000004594
GO:0098644	complex of collagen trimers	cellular_component	2.94e-05	0.0039088	9	2677	12	14096	ENSGALG00000006958,ENSGALG00000002546,ENSGALG00000008141,ENSGALG00000031112,ENSGALG00000036798,ENSGALG00000009641,ENSGALG00000041555,ENSGALG00000016843,ENSGALG00000008266
GO:0016328	lateral plasma membrane	cellular_component	6.02e-05	0.0068667	14	2677	26	14096	ENSGALG00000037203,ENSGALG00000008969,ENSGALG00000000608,ENSGALG00000002709,ENSGALG00000042308,ENSGALG00000008222,ENSGALG00000030643,ENSGALG00000022557,ENSGALG00000026862,ENSGALG00000013085,ENSGALG00000033510,ENSGALG00000015010,ENSGALG00000014873,ENSGALG00000015410
GO:0000777	condensed chromosome kinetochore	cellular_component	6.87e-05	0.0075493	14	2677	26	14096	ENSGALG00000014788,ENSGALG00000017128,ENSGALG00000010900,ENSGALG00000037735,ENSGALG00000036892,ENSGALG00000014801,ENSGALG00000028900,ENSGALG00000027454,ENSGALG00000001632,ENSGALG00000006110,Novel03288,ENSGALG00000008233,ENSGALG00000024481,Novel01064
GO:0005509	calcium ion binding	molecular_function	1.16e-09	1.04e-06	131	2677	428	14096	Novel01191,ENSGALG00000031373,ENSGALG00000019060,ENSGALG00000032287,Novel01389,ENSGALG00000001122,Novel02911,ENSGALG00000020402,ENSGALG00000016934,ENSGALG00000003283,ENSGALG00000014804,ENSGALG00000016941,ENSGALG00000006602,ENSGALG00000011740,ENSGALG00000013598,ENSGALG00000000585,ENSGALG00000016105,ENSGALG00000009719,ENSGALG00000006725,ENSGALG00000008424,ENSGALG00000004804,ENSGALG00000002907,ENSGA…
GO:0022836	gated channel activity	molecular_function	5.94e-07	0.0001542	82	2677	265	14096	ENSGALG00000007269,ENSGALG00000004980,ENSGALG00000006112,ENSGALG00000034895,ENSGALG00000009638,ENSGALG00000037744,ENSGALG00000005822,ENSGALG00000005332,ENSGALG00000004096,ENSGALG00000027771,ENSGALG00000008486,ENSGALG00000009405,ENSGALG00000003833,ENSGALG00000015126,ENSGALG00000003911,ENSGALG00000041808,ENSGALG00000006202,ENSGALG00000012594,ENSGALG00000016565,ENSGALG00000034427,ENSGALG00000025788,…
GO:0005244	voltage-gated ion channel activity	molecular_function	8.58e-07	0.00021057	52	2677	144	14096	ENSGALG00000009638,ENSGALG00000029502,ENSGALG00000027793,ENSGALG00000043764,ENSGALG00000001512,ENSGALG00000037744,ENSGALG00000005822,ENSGALG00000001645,ENSGALG00000006112,ENSGALG00000016820,ENSGALG00000004980,ENSGALG00000005215,ENSGALG00000034895,ENSGALG00000010204,Novel01993,ENSGALG00000003911,ENSGALG00000003833,ENSGALG00000008456,ENSGALG00000034427,Novel01287,ENSGALG00000012594,ENSGALG000000258…
GO:0022832	voltage-gated channel activity	molecular_function	8.58e-07	0.00021057	52	2677	144	14096	ENSGALG00000003911,ENSGALG00000003833,ENSGALG00000008456,Novel01993,ENSGALG00000025804,ENSGALG00000012710,ENSGALG00000025788,ENSGALG00000015145,ENSGALG00000034427,Novel01287,ENSGALG00000012594,ENSGALG00000016607,ENSGALG00000027771,ENSGALG00000005332,ENSGALG00000008486,ENSGALG00000029502,ENSGALG00000027793,ENSGALG00000009638,ENSGALG00000005822,ENSGALG00000043764,ENSGALG00000001512,ENSGALG000000377…
GO:0015267	channel activity	molecular_function	2.27e-06	0.0004847	104	2677	363	14096	ENSGALG00000005822,ENSGALG00000037744,ENSGALG00000009638,ENSGALG00000034895,ENSGALG00000000745,ENSGALG00000006112,ENSGALG00000004980,ENSGALG00000007269,ENSGALG00000003778,ENSGALG00000012710,ENSGALG00000025804,ENSGALG00000025788,ENSGALG00000034427,ENSGALG00000006202,ENSGALG00000016565,ENSGALG00000012594,ENSGALG00000015126,ENSGALG00000003911,ENSGALG00000041808,ENSGALG00000003833,ENSGALG00000009405,…
GO:0022803	passive transmembrane transporter activity	molecular_function	2.27e-06	0.0004847	104	2677	363	14096	ENSGALG00000020505,ENSGALG00000006922,ENSGALG00000004376,ENSGALG00000002707,ENSGALG00000016448,ENSGALG00000010269,ENSGALG00000015154,ENSGALG00000015551,ENSGALG00000004721,ENSGALG00000014873,ENSGALG00000041878,ENSGALG00000026940,ENSGALG00000004074,ENSGALG00000017271,ENSGALG00000020143,ENSGALG00000039826,ENSGALG00000011614,ENSGALG00000043728,ENSGALG00000003863,ENSGALG00000001282,ENSGALG00000008222,…
GO:0022838	substrate-specific channel activity	molecular_function	7.51e-06	0.0012612	99	2677	350	14096	ENSGALG00000010204,ENSGALG00000005215,ENSGALG00000036360,ENSGALG00000016820,ENSGALG00000001645,ENSGALG00000027415,ENSGALG00000043764,ENSGALG00000001512,ENSGALG00000029502,ENSGALG00000027793,ENSGALG00000029392,ENSGALG00000016607,ENSGALG00000009705,ENSGALG00000015145,ENSGALG00000034025,Novel01287,ENSGALG00000008456,ENSGALG00000013244,Novel01993,ENSGALG00000008960,Novel02798,ENSGALG00000002452,ENSGA…
GO:0005216	ion channel activity	molecular_function	8.21e-06	0.0013267	96	2677	338	14096	ENSGALG00000009638,ENSGALG00000037744,ENSGALG00000005822,ENSGALG00000007269,ENSGALG00000003778,ENSGALG00000006112,ENSGALG00000004980,ENSGALG00000000745,ENSGALG00000034895,ENSGALG00000015126,ENSGALG00000041808,ENSGALG00000003911,ENSGALG00000003833,ENSGALG00000034427,ENSGALG00000006202,ENSGALG00000012594,ENSGALG00000016565,ENSGALG00000025788,ENSGALG00000025804,ENSGALG00000012710,ENSGALG00000005332,…
GO:0022843	voltage-gated cation channel activity	molecular_function	8.29e-06	0.0013267	44	2677	123	14096	ENSGALG00000037841,ENSGALG00000007666,ENSGALG00000007409,ENSGALG00000006220,ENSGALG00000011005,ENSGALG00000007980,ENSGALG00000021272,ENSGALG00000011009,ENSGALG00000004373,ENSGALG00000012142,ENSGALG00000043728,ENSGALG00000009919,ENSGALG00000004074,Novel01511,ENSGALG00000004376,ENSGALG00000020505,ENSGALG00000006922,ENSGALG00000004721,ENSGALG00000010269,ENSGALG00000016448,ENSGALG00000010204,ENSGALG0…
GO:0008307	structural constituent of muscle	molecular_function	9.93e-06	0.0015207	9	2677	11	14096	ENSGALG00000019719,ENSGALG00000009089,ENSGALG00000007048,ENSGALG00000009050,ENSGALG00000006520,ENSGALG00000004044,ENSGALG00000035845,ENSGALG00000013414,ENSGALG00000008945
GO:0022857	transmembrane transporter activity	molecular_function	3.63e-05	0.0045811	200	2677	823	14096	ENSGALG00000002783,ENSGALG00000010029,ENSGALG00000001564,ENSGALG00000009730,ENSGALG00000014695,ENSGALG00000034109,ENSGALG00000010992,ENSGALG00000030250,ENSGALG00000006503,ENSGALG00000016448,ENSGALG00000004721,ENSGALG00000014873,ENSGALG00000012298,ENSGALG00000020505,ENSGALG00000002707,ENSGALG00000004376,Novel01712,ENSGALG00000035075,ENSGALG00000026940,ENSGALG00000020143,ENSGALG00000039826,ENSGALG0…
GO:0005261	cation channel activity	molecular_function	8.33e-05	0.0087306	72	2677	251	14096	ENSGALG00000027472,ENSGALG00000040479,ENSGALG00000004373,ENSGALG00000012021,Novel00968,ENSGALG00000011009,ENSGALG00000021272,ENSGALG00000006220,ENSGALG00000000367,Novel02798,ENSGALG00000003849,ENSGALG00000016017,Novel01117,ENSGALG00000009919,ENSGALG00000004660,ENSGALG00000012142,ENSGALG00000027793,ENSGALG00000001512,ENSGALG00000043764,ENSGALG00000027415,ENSGALG00000001645,ENSGALG00000036360,ENSGA…
GO:0015075	ion transmembrane transporter activity	molecular_function	9.34e-05	0.009598	171	2677	699	14096	ENSGALG00000011052,Novel02798,ENSGALG00000005672,ENSGALG00000004936,ENSGALG00000000367,ENSGALG00000006220,ENSGALG00000021272,ENSGALG00000016744,ENSGALG00000011009,ENSGALG00000004373,ENSGALG00000027472,ENSGALG00000012021,ENSGALG00000014372,ENSGALG00000028302,ENSGALG00000009919,ENSGALG00000002204,ENSGALG00000016094,Novel01423,ENSGALG00000041932,ENSGALG00000042199,ENSGALG00000016017,ENSGALG000000052…

## Sheet: E16 vs 1d
GO_accession	Description	Term_type	Over_represented_pValue	Corrected_pValue	DEG_item	DEG_list	Bg_item	Bg_list	Gene_names
GO:0015980	energy derivation by oxidation of organic compounds	biological_process	2.18e-13	3.91e-09	37	982	137	14096	ENSGALG00000032456,ENSGALG00000011020,ENSGALG00000004801,ENSGALG00000001949,ENSGALG00000014155,Novel02589,ENSGALG00000006670,ENSGALG00000028026,ENSGALG00000013167,ENSGALG00000042750,ENSGALG00000010614,ENSGALG00000008858,ENSGALG00000037593,ENSGALG00000013191,ENSGALG00000008066,ENSGALG00000001184,ENSGALG00000011950,ENSGALG00000032142,ENSGALG00000043768,ENSGALG00000010476,ENSGALG00000043290,ENSGALG0…
GO:0045333	cellular respiration	biological_process	1.7e-11	1.52e-07	27	982	89	14096	Novel02589,ENSGALG00000015961,ENSGALG00000013167,ENSGALG00000042750,ENSGALG00000028026,ENSGALG00000005789,ENSGALG00000011020,ENSGALG00000032456,ENSGALG00000001949,ENSGALG00000014155,ENSGALG00000043768,ENSGALG00000032142,ENSGALG00000010476,ENSGALG00000008066,ENSGALG00000036229,ENSGALG00000032079,ENSGALG00000011661,ENSGALG00000035334,ENSGALG00000009545,ENSGALG00000001184,ENSGALG00000011950,ENSGALG0…
GO:0006091	generation of precursor metabolites and energy	biological_process	3.4e-11	2.03e-07	42	982	194	14096	ENSGALG00000028026,ENSGALG00000042750,ENSGALG00000013167,Novel01740,Novel02589,ENSGALG00000006670,ENSGALG00000001949,ENSGALG00000014155,ENSGALG00000010202,ENSGALG00000032456,ENSGALG00000011020,ENSGALG00000004801,ENSGALG00000011950,ENSGALG00000001184,ENSGALG00000008066,ENSGALG00000013191,ENSGALG00000010614,ENSGALG00000008858,ENSGALG00000037593,ENSGALG00000002944,ENSGALG00000005789,ENSGALG000000019…
GO:0022904	respiratory electron transport chain	biological_process	4.86e-10	2.18e-06	17	982	42	14096	ENSGALG00000032456,ENSGALG00000011020,ENSGALG00000043768,Novel02589,ENSGALG00000005789,ENSGALG00000013167,ENSGALG00000010614,ENSGALG00000037593,ENSGALG00000013191,ENSGALG00000029500,ENSGALG00000036229,ENSGALG00000032079,ENSGALG00000011661,ENSGALG00000008066,ENSGALG00000001184,ENSGALG00000009545,ENSGALG00000035334
GO:0055114	oxidation-reduction process	biological_process	9.75e-10	2.91e-06	89	982	661	14096	ENSGALG00000010001,ENSGALG00000004833,ENSGALG00000040426,Novel02767,ENSGALG00000002855,Novel00652,ENSGALG00000016261,ENSGALG00000028026,ENSGALG00000002988,Novel01337,ENSGALG00000027483,Novel00691,ENSGALG00000014155,ENSGALG00000001949,Novel00313,ENSGALG00000004801,ENSGALG00000011020,ENSGALG00000001184,ENSGALG00000011950,Novel00854,ENSGALG00000009703,ENSGALG00000002925,ENSGALG00000008701,ENSGALG000…
GO:0022900	electron transport chain	biological_process	3.88e-09	7.28e-06	18	982	51	14096	ENSGALG00000032456,ENSGALG00000011020,ENSGALG00000043768,Novel02589,ENSGALG00000005789,ENSGALG00000028026,ENSGALG00000013167,ENSGALG00000010614,ENSGALG00000037593,ENSGALG00000029500,ENSGALG00000013191,ENSGALG00000011661,ENSGALG00000032079,ENSGALG00000036229,ENSGALG00000008066,ENSGALG00000001184,ENSGALG00000009545,ENSGALG00000035334
GO:0048285	organelle fission	biological_process	2.65e-07	0.00033934	46	982	300	14096	ENSGALG00000003438,ENSGALG00000008233,ENSGALG00000007706,ENSGALG00000031524,ENSGALG00000011281,ENSGALG00000042418,ENSGALG00000027454,ENSGALG00000032664,ENSGALG00000030597,ENSGALG00000039448,ENSGALG00000008713,ENSGALG00000008584,ENSGALG00000033231,ENSGALG00000006110,ENSGALG00000037593,ENSGALG00000009971,ENSGALG00000007768,ENSGALG00000001632,ENSGALG00000017128,ENSGALG00000013208,Novel00092,ENSGALG0…
GO:0022402	cell cycle process	biological_process	4.36e-07	0.00052034	81	982	664	14096	ENSGALG00000012160,ENSGALG00000013422,ENSGALG00000032398,ENSGALG00000005411,ENSGALG00000000516,ENSGALG00000017148,ENSGALG00000033063,ENSGALG00000024481,ENSGALG00000008538,ENSGALG00000031427,ENSGALG00000036892,ENSGALG00000031553,Novel01040,ENSGALG00000019622,ENSGALG00000001491,ENSGALG00000025810,ENSGALG00000003227,ENSGALG00000030313,ENSGALG00000010478,ENSGALG00000009690,ENSGALG00000030597,ENSGALG0…
GO:0000280	nuclear division	biological_process	8.49e-07	0.00072479	42	982	272	14096	ENSGALG00000001632,ENSGALG00000007768,ENSGALG00000009971,Novel00092,ENSGALG00000013208,ENSGALG00000017128,ENSGALG00000008713,ENSGALG00000039448,ENSGALG00000006110,ENSGALG00000033231,ENSGALG00000008584,ENSGALG00000042418,ENSGALG00000030597,ENSGALG00000032664,ENSGALG00000027454,ENSGALG00000007706,ENSGALG00000031524,ENSGALG00000008233,ENSGALG00000003438,ENSGALG00000011281,ENSGALG00000006091,ENSGALG0…
GO:0042773	ATP synthesis coupled electron transport	biological_process	1.22e-06	0.00099274	11	982	29	14096	ENSGALG00000032079,ENSGALG00000036229,ENSGALG00000008066,Novel02589,ENSGALG00000005789,ENSGALG00000001184,ENSGALG00000011020,ENSGALG00000037593,ENSGALG00000029500,ENSGALG00000013191,ENSGALG00000043768
GO:0009199	ribonucleoside triphosphate metabolic process	biological_process	1.48e-06	0.0010444	28	982	150	14096	Novel02589,Novel01740,ENSGALG00000001992,ENSGALG00000005789,ENSGALG00000011020,ENSGALG00000033271,ENSGALG00000010202,ENSGALG00000043768,ENSGALG00000032142,ENSGALG00000008066,ENSGALG00000026776,ENSGALG00000001330,ENSGALG00000032079,ENSGALG00000036229,ENSGALG00000014528,ENSGALG00000006040,ENSGALG00000041470,ENSGALG00000001184,ENSGALG00000037593,ENSGALG00000037880,ENSGALG00000001452,Novel01063,ENSGA…
GO:0046034	ATP metabolic process	biological_process	1.52e-06	0.0010444	26	982	133	14096	Novel01063,ENSGALG00000032465,ENSGALG00000013191,ENSGALG00000029500,ENSGALG00000012755,ENSGALG00000041091,ENSGALG00000037593,ENSGALG00000037880,ENSGALG00000001452,ENSGALG00000041470,ENSGALG00000001184,ENSGALG00000014528,ENSGALG00000008066,ENSGALG00000032079,ENSGALG00000036229,ENSGALG00000001330,ENSGALG00000026776,ENSGALG00000010202,ENSGALG00000033271,ENSGALG00000032142,ENSGALG00000043768,ENSGALG0…
GO:0009141	nucleoside triphosphate metabolic process	biological_process	1.85e-06	0.001225	30	982	169	14096	ENSGALG00000008066,ENSGALG00000032079,ENSGALG00000036229,ENSGALG00000026776,ENSGALG00000001330,ENSGALG00000006040,ENSGALG00000041470,ENSGALG00000001184,ENSGALG00000014528,ENSGALG00000037593,Novel00809,ENSGALG00000001452,ENSGALG00000037880,Novel01063,Novel00594,ENSGALG00000032465,ENSGALG00000013191,ENSGALG00000029500,ENSGALG00000012755,ENSGALG00000041091,Novel02589,ENSGALG00000015961,Novel01740,EN…
GO:0009060	aerobic respiration	biological_process	2.45e-06	0.0015247	12	982	36	14096	ENSGALG00000015961,ENSGALG00000008066,ENSGALG00000011950,ENSGALG00000005789,ENSGALG00000019967,ENSGALG00000013167,ENSGALG00000035334,ENSGALG00000008858,ENSGALG00000032142,ENSGALG00000010476,ENSGALG00000014155,ENSGALG00000001949
GO:0009205	purine ribonucleoside triphosphate metabolic process	biological_process	2.47e-06	0.0015247	27	982	145	14096	ENSGALG00000011020,ENSGALG00000033271,ENSGALG00000010202,ENSGALG00000032142,ENSGALG00000043768,Novel02589,Novel01740,ENSGALG00000001992,ENSGALG00000005789,ENSGALG00000037593,ENSGALG00000001452,ENSGALG00000037880,Novel01063,ENSGALG00000012755,ENSGALG00000029500,ENSGALG00000041091,Novel00594,ENSGALG00000032465,ENSGALG00000013191,ENSGALG00000008066,ENSGALG00000026776,ENSGALG00000001330,ENSGALG000000…
GO:0055086	nucleobase-containing small molecule metabolic process	biological_process	2.58e-06	0.0015382	56	982	426	14096	ENSGALG00000010202,ENSGALG00000016524,ENSGALG00000010125,ENSGALG00000011020,ENSGALG00000013604,Novel02589,ENSGALG00000014858,Novel01740,ENSGALG00000005043,Novel00594,ENSGALG00000013191,ENSGALG00000032465,Novel00847,ENSGALG00000041091,ENSGALG00000008701,ENSGALG00000037593,Novel00809,ENSGALG00000014869,ENSGALG00000001452,ENSGALG00000001184,ENSGALG00000008066,ENSGALG00000006431,ENSGALG00000001330,EN…
GO:0009123	nucleoside monophosphate metabolic process	biological_process	2.97e-06	0.0017162	29	982	165	14096	Novel01063,ENSGALG00000012755,ENSGALG00000029500,ENSGALG00000041091,ENSGALG00000032465,ENSGALG00000013191,ENSGALG00000037593,ENSGALG00000001452,ENSGALG00000037880,ENSGALG00000014528,ENSGALG00000006040,ENSGALG00000041470,ENSGALG00000001184,ENSGALG00000008066,ENSGALG00000026776,ENSGALG00000001330,ENSGALG00000032079,ENSGALG00000036229,ENSGALG00000033271,ENSGALG00000010202,ENSGALG00000043768,ENSGALG0…
GO:0042775	mitochondrial ATP synthesis coupled electron transport	biological_process	3.26e-06	0.0018283	10	982	26	14096	ENSGALG00000036229,ENSGALG00000032079,Novel02589,ENSGALG00000008066,ENSGALG00000005789,ENSGALG00000001184,ENSGALG00000037593,ENSGALG00000011020,ENSGALG00000013191,ENSGALG00000043768
GO:0006119	oxidative phosphorylation	biological_process	3.66e-06	0.0019411	12	982	38	14096	ENSGALG00000008066,Novel02589,ENSGALG00000036229,ENSGALG00000032079,ENSGALG00000001184,ENSGALG00000005789,ENSGALG00000011020,ENSGALG00000037593,ENSGALG00000029500,ENSGALG00000043768,ENSGALG00000032142,ENSGALG00000013191
GO:1903047	mitotic cell cycle process	biological_process	3.68e-06	0.0019411	52	982	383	14096	ENSGALG00000012220,ENSGALG00000003438,ENSGALG00000031524,ENSGALG00000007706,ENSGALG00000002346,ENSGALG00000008233,ENSGALG00000004037,ENSGALG00000027454,ENSGALG00000030597,ENSGALG00000040794,ENSGALG00000042418,ENSGALG00000008584,ENSGALG00000006639,ENSGALG00000033231,ENSGALG00000006110,ENSGALG00000035030,ENSGALG00000039448,ENSGALG00000008713,ENSGALG00000017128,ENSGALG00000003085,ENSGALG00000013208,…
GO:0009144	purine nucleoside triphosphate metabolic process	biological_process	4.67e-06	0.0023264	27	982	150	14096	Novel01063,ENSGALG00000041091,ENSGALG00000012755,ENSGALG00000029500,ENSGALG00000032465,Novel00594,ENSGALG00000013191,ENSGALG00000037593,ENSGALG00000001452,ENSGALG00000037880,ENSGALG00000014528,ENSGALG00000001184,ENSGALG00000041470,ENSGALG00000008066,ENSGALG00000026776,ENSGALG00000001330,ENSGALG00000036229,ENSGALG00000032079,ENSGALG00000033271,ENSGALG00000010202,ENSGALG00000032142,ENSGALG000000437…
GO:0046128	purine ribonucleoside metabolic process	biological_process	5.26e-06	0.0024803	32	982	196	14096	ENSGALG00000036229,ENSGALG00000032079,ENSGALG00000026776,ENSGALG00000041470,ENSGALG00000014528,ENSGALG00000037880,ENSGALG00000029500,ENSGALG00000012755,Novel01063,Novel00875,ENSGALG00000005789,ENSGALG00000002479,ENSGALG00000001992,ENSGALG00000043768,ENSGALG00000032142,ENSGALG00000033271,ENSGALG00000043290,ENSGALG00000001330,ENSGALG00000006431,ENSGALG00000008066,ENSGALG00000001184,ENSGALG000000014…
GO:0042278	purine nucleoside metabolic process	biological_process	5.83e-06	0.0026795	32	982	197	14096	Novel01740,Novel02589,ENSGALG00000010202,ENSGALG00000011020,ENSGALG00000001184,ENSGALG00000006431,ENSGALG00000001330,ENSGALG00000008066,ENSGALG00000013191,ENSGALG00000032465,Novel00594,ENSGALG00000041091,ENSGALG00000005043,ENSGALG00000001452,ENSGALG00000037593,ENSGALG00000005789,ENSGALG00000002479,ENSGALG00000001992,Novel00875,ENSGALG00000032142,ENSGALG00000043768,ENSGALG00000043290,ENSGALG000000…
GO:0009126	purine nucleoside monophosphate metabolic process	biological_process	6.52e-06	0.0029194	27	982	153	14096	ENSGALG00000014528,ENSGALG00000001184,ENSGALG00000041470,ENSGALG00000001330,ENSGALG00000026776,ENSGALG00000036229,ENSGALG00000032079,ENSGALG00000008066,ENSGALG00000012755,ENSGALG00000041091,ENSGALG00000029500,ENSGALG00000013191,ENSGALG00000032465,Novel01063,ENSGALG00000037880,ENSGALG00000001452,ENSGALG00000037593,ENSGALG00000005789,ENSGALG00000001992,Novel01740,Novel02589,ENSGALG00000032142,ENSGA…
GO:0006753	nucleoside phosphate metabolic process	biological_process	8.9e-06	0.0037973	50	982	381	14096	ENSGALG00000040035,Novel01063,ENSGALG00000011721,ENSGALG00000003821,ENSGALG00000012755,ENSGALG00000029500,ENSGALG00000031397,ENSGALG00000008855,ENSGALG00000037880,ENSGALG00000016196,ENSGALG00000006040,ENSGALG00000041470,ENSGALG00000014528,ENSGALG00000016442,ENSGALG00000036229,ENSGALG00000032079,ENSGALG00000026776,ENSGALG00000033271,ENSGALG00000043768,ENSGALG00000014897,ENSGALG00000032142,ENSGALG0…
GO:0007067	mitotic nuclear division	biological_process	9.62e-06	0.0039672	31	982	191	14096	ENSGALG00000017128,ENSGALG00000014425,ENSGALG00000031553,ENSGALG00000010120,ENSGALG00000036892,ENSGALG00000012755,ENSGALG00000013208,ENSGALG00000015874,ENSGALG00000014801,ENSGALG00000007768,ENSGALG00000001632,ENSGALG00000008584,ENSGALG00000001491,ENSGALG00000026380,ENSGALG00000033231,ENSGALG00000006110,ENSGALG00000039448,ENSGALG00000008713,ENSGALG00000015691,ENSGALG00000004161,ENSGALG00000043799,…
GO:0098813	nuclear chromosome segregation	biological_process	9.74e-06	0.0039672	24	982	130	14096	ENSGALG00000037453,ENSGALG00000001491,ENSGALG00000033231,ENSGALG00000026380,ENSGALG00000006110,ENSGALG00000008584,ENSGALG00000015691,ENSGALG00000039448,ENSGALG00000031553,ENSGALG00000014425,ENSGALG00000010120,ENSGALG00000036892,ENSGALG00000015874,ENSGALG00000013208,ENSGALG00000014801,ENSGALG00000031427,ENSGALG00000006091,ENSGALG00000011281,ENSGALG00000024481,ENSGALG00000008233,ENSGALG00000043799,…
GO:0009117	nucleotide metabolic process	biological_process	1.23e-05	0.0048916	49	982	375	14096	ENSGALG00000014528,ENSGALG00000006040,ENSGALG00000041470,ENSGALG00000016196,ENSGALG00000026776,ENSGALG00000032079,ENSGALG00000036229,ENSGALG00000016442,ENSGALG00000012755,ENSGALG00000029500,ENSGALG00000011721,ENSGALG00000003821,Novel01063,ENSGALG00000040035,ENSGALG00000037880,ENSGALG00000008855,ENSGALG00000031397,ENSGALG00000026187,ENSGALG00000005789,ENSGALG00000001992,ENSGALG00000003837,Novel008…
GO:0009161	ribonucleoside monophosphate metabolic process	biological_process	1.3e-05	0.0050539	27	982	159	14096	ENSGALG00000032142,ENSGALG00000043768,ENSGALG00000033271,ENSGALG00000010202,ENSGALG00000011020,ENSGALG00000005789,ENSGALG00000001992,Novel01740,Novel02589,ENSGALG00000029500,ENSGALG00000012755,ENSGALG00000041091,ENSGALG00000013191,ENSGALG00000032465,Novel01063,ENSGALG00000037880,ENSGALG00000001452,ENSGALG00000037593,ENSGALG00000014528,ENSGALG00000006040,ENSGALG00000041470,ENSGALG00000001184,ENSGA…
GO:0009119	ribonucleoside metabolic process	biological_process	1.33e-05	0.0050539	33	982	214	14096	ENSGALG00000005043,ENSGALG00000041091,ENSGALG00000032465,Novel00594,ENSGALG00000013191,ENSGALG00000037593,ENSGALG00000001452,ENSGALG00000001184,ENSGALG00000008066,ENSGALG00000006431,ENSGALG00000001330,ENSGALG00000010202,ENSGALG00000011020,Novel02589,Novel01740,Novel01063,ENSGALG00000012755,ENSGALG00000029500,ENSGALG00000037880,ENSGALG00000014528,ENSGALG00000041470,ENSGALG00000006040,ENSGALG000000…
GO:0000278	mitotic cell cycle	biological_process	1.5e-05	0.0056032	56	982	444	14096	ENSGALG00000006755,ENSGALG00000039448,ENSGALG00000008713,ENSGALG00000033231,ENSGALG00000035030,ENSGALG00000006110,ENSGALG00000008584,ENSGALG00000006639,ENSGALG00000007768,ENSGALG00000001632,ENSGALG00000011963,ENSGALG00000013208,ENSGALG00000003085,ENSGALG00000017128,ENSGALG00000007706,ENSGALG00000031524,ENSGALG00000008233,ENSGALG00000002346,ENSGALG00000041299,ENSGALG00000003438,ENSGALG00000012220,…
GO:0009167	purine ribonucleoside monophosphate metabolic process	biological_process	1.54e-05	0.0056288	26	982	151	14096	Novel02589,Novel01740,ENSGALG00000001992,ENSGALG00000005789,ENSGALG00000011020,ENSGALG00000010202,ENSGALG00000033271,ENSGALG00000043768,ENSGALG00000032142,ENSGALG00000008066,ENSGALG00000032079,ENSGALG00000036229,ENSGALG00000026776,ENSGALG00000001330,ENSGALG00000041470,ENSGALG00000001184,ENSGALG00000014528,ENSGALG00000037593,ENSGALG00000037880,ENSGALG00000001452,Novel01063,ENSGALG00000032465,ENSGA…
GO:1901657	glycosyl compound metabolic process	biological_process	1.62e-05	0.005824	35	982	236	14096	ENSGALG00000033271,ENSGALG00000043290,ENSGALG00000043768,ENSGALG00000032142,ENSGALG00000001992,ENSGALG00000002479,ENSGALG00000005789,Novel00875,Novel01063,ENSGALG00000012755,ENSGALG00000029500,ENSGALG00000037880,ENSGALG00000012260,ENSGALG00000014528,ENSGALG00000041470,ENSGALG00000006040,ENSGALG00000026776,ENSGALG00000007191,ENSGALG00000032079,ENSGALG00000036229,ENSGALG00000010202,ENSGALG000000110…
GO:0009116	nucleoside metabolic process	biological_process	1.72e-05	0.0059966	34	982	227	14096	ENSGALG00000033271,ENSGALG00000043290,ENSGALG00000043768,ENSGALG00000032142,Novel00875,ENSGALG00000001992,ENSGALG00000002479,ENSGALG00000005789,ENSGALG00000037880,Novel01063,ENSGALG00000012755,ENSGALG00000029500,ENSGALG00000026776,ENSGALG00000007191,ENSGALG00000032079,ENSGALG00000036229,ENSGALG00000014528,ENSGALG00000041470,ENSGALG00000006040,ENSGALG00000011020,ENSGALG00000010202,Novel02589,Novel…
GO:0071103	DNA conformation change	biological_process	1.74e-05	0.0059966	23	982	119	14096	ENSGALG00000012546,ENSGALG00000008538,ENSGALG00000014425,ENSGALG00000004687,ENSGALG00000009032,ENSGALG00000039448,ENSGALG00000030313,ENSGALG00000015691,ENSGALG00000008584,ENSGALG00000004794,ENSGALG00000001491,ENSGALG00000027594,ENSGALG00000042263,ENSGALG00000016332,ENSGALG00000030567,ENSGALG00000025786,ENSGALG00000004037,ENSGALG00000012969,ENSGALG00000015363,Novel00168,ENSGALG00000033063,ENSGALG0…
GO:0007059	chromosome segregation	biological_process	2.33e-05	0.0077294	29	982	181	14096	ENSGALG00000032664,ENSGALG00000012160,ENSGALG00000043799,ENSGALG00000005411,ENSGALG00000003922,ENSGALG00000011281,ENSGALG00000024481,ENSGALG00000008233,ENSGALG00000010900,ENSGALG00000014801,ENSGALG00000013208,ENSGALG00000015874,ENSGALG00000010120,ENSGALG00000014425,ENSGALG00000031553,ENSGALG00000036892,ENSGALG00000017128,ENSGALG00000031427,ENSGALG00000001632,ENSGALG00000006091,ENSGALG00000006110,…
GO:0070469	respiratory chain	cellular_component	8.25e-10	2.91e-06	20	982	62	14096	ENSGALG00000032079,ENSGALG00000036229,ENSGALG00000008066,ENSGALG00000035334,ENSGALG00000013191,ENSGALG00000009703,ENSGALG00000029500,ENSGALG00000041418,ENSGALG00000005789,ENSGALG00000042750,ENSGALG00000007205,ENSGALG00000042809,ENSGALG00000030436,ENSGALG00000028537,ENSGALG00000028026,ENSGALG00000032456,ENSGALG00000011020,ENSGALG00000032142,ENSGALG00000043768,ENSGALG00000002033
GO:0005743	mitochondrial inner membrane	cellular_component	1.16e-09	2.96e-06	44	982	246	14096	ENSGALG00000016555,ENSGALG00000016739,ENSGALG00000043768,ENSGALG00000032142,ENSGALG00000014897,ENSGALG00000001096,ENSGALG00000015961,ENSGALG00000028302,ENSGALG00000030436,ENSGALG00000005789,ENSGALG00000006947,ENSGALG00000029500,ENSGALG00000009700,ENSGALG00000032079,ENSGALG00000011661,ENSGALG00000035334,ENSGALG00000006503,ENSGALG00000009545,ENSGALG00000030775,ENSGALG00000032456,ENSGALG00000002033,…
GO:0098803	respiratory chain complex	cellular_component	3.31e-09	7.28e-06	18	982	54	14096	ENSGALG00000005789,ENSGALG00000028026,ENSGALG00000042750,ENSGALG00000007205,ENSGALG00000042809,ENSGALG00000030436,ENSGALG00000028537,ENSGALG00000041418,ENSGALG00000032142,ENSGALG00000043768,ENSGALG00000002033,ENSGALG00000032456,ENSGALG00000035334,ENSGALG00000032079,ENSGALG00000008066,ENSGALG00000029500,ENSGALG00000013191,ENSGALG00000009703
GO:0019866	organelle inner membrane	cellular_component	4.06e-09	7.28e-06	46	982	274	14096	ENSGALG00000001452,ENSGALG00000010614,ENSGALG00000014869,ENSGALG00000015437,ENSGALG00000039212,ENSGALG00000037593,ENSGALG00000041091,ENSGALG00000013191,ENSGALG00000032465,ENSGALG00000009703,ENSGALG00000001330,ENSGALG00000008066,ENSGALG00000001184,ENSGALG00000014692,ENSGALG00000032456,ENSGALG00000030775,ENSGALG00000005363,ENSGALG00000027963,ENSGALG00000001949,ENSGALG00000002033,ENSGALG00000041418,…
GO:0005740	mitochondrial envelope	cellular_component	5.12e-09	8.34e-06	55	982	357	14096	ENSGALG00000015961,ENSGALG00000028302,ENSGALG00000016979,ENSGALG00000030436,ENSGALG00000005789,ENSGALG00000016555,ENSGALG00000016739,ENSGALG00000043768,ENSGALG00000010476,ENSGALG00000001096,ENSGALG00000032142,ENSGALG00000014897,ENSGALG00000026776,ENSGALG00000011661,ENSGALG00000009700,ENSGALG00000032079,ENSGALG00000036229,ENSGALG00000006503,ENSGALG00000035334,ENSGALG00000009545,ENSGALG00000006947,…
GO:0031966	mitochondrial membrane	cellular_component	8.71e-09	1.3e-05	52	982	333	14096	ENSGALG00000006947,ENSGALG00000029500,ENSGALG00000036229,ENSGALG00000032079,ENSGALG00000009700,ENSGALG00000026776,ENSGALG00000011661,ENSGALG00000006503,ENSGALG00000035334,ENSGALG00000009545,ENSGALG00000016555,ENSGALG00000016739,ENSGALG00000043768,ENSGALG00000010476,ENSGALG00000014897,ENSGALG00000032142,ENSGALG00000001096,ENSGALG00000028302,ENSGALG00000015961,ENSGALG00000030436,ENSGALG00000016979,…
GO:0000775	chromosome, centromeric region	cellular_component	1.14e-07	0.00015646	26	982	116	14096	ENSGALG00000027454,ENSGALG00000012160,ENSGALG00000043799,ENSGALG00000008014,ENSGALG00000011914,ENSGALG00000011281,ENSGALG00000004515,ENSGALG00000003438,ENSGALG00000015363,ENSGALG00000024481,ENSGALG00000031524,ENSGALG00000008233,ENSGALG00000017128,ENSGALG00000010900,ENSGALG00000014801,ENSGALG00000015874,ENSGALG00000010120,ENSGALG00000036892,ENSGALG00000005038,ENSGALG00000001632,ENSGALG00000011683,…
GO:0098687	chromosomal region	cellular_component	5.34e-07	0.00056325	35	982	199	14096	ENSGALG00000027454,ENSGALG00000004037,ENSGALG00000011914,ENSGALG00000042418,ENSGALG00000011281,ENSGALG00000003438,ENSGALG00000031524,ENSGALG00000008233,ENSGALG00000010623,ENSGALG00000017128,ENSGALG00000003085,ENSGALG00000001632,ENSGALG00000007768,ENSGALG00000004794,ENSGALG00000006110,ENSGALG00000004687,ENSGALG00000012160,ENSGALG00000043799,ENSGALG00000008014,ENSGALG00000006037,ENSGALG00000004515,…
GO:0044429	mitochondrial part	cellular_component	5.66e-07	0.00056356	59	982	450	14096	Novel02076,ENSGALG00000001184,ENSGALG00000012683,ENSGALG00000008066,ENSGALG00000013830,ENSGALG00000001330,ENSGALG00000009703,ENSGALG00000032465,ENSGALG00000013191,ENSGALG00000041091,ENSGALG00000023435,ENSGALG00000016456,ENSGALG00000037593,ENSGALG00000039212,ENSGALG00000017316,ENSGALG00000014869,ENSGALG00000015437,ENSGALG00000001452,ENSGALG00000010614,ENSGALG00000036853,ENSGALG00000028537,ENSGALG0…
GO:0005746	mitochondrial respiratory chain	cellular_component	7.6e-07	0.00068818	15	982	53	14096	ENSGALG00000028026,ENSGALG00000007205,ENSGALG00000030436,ENSGALG00000028537,ENSGALG00000042809,ENSGALG00000042750,ENSGALG00000005789,ENSGALG00000041418,ENSGALG00000008066,ENSGALG00000002033,ENSGALG00000029500,ENSGALG00000013191,ENSGALG00000043768,ENSGALG00000032142,ENSGALG00000009703
GO:0000779	condensed chromosome, centromeric region	cellular_component	7.68e-07	0.00068818	12	982	31	14096	ENSGALG00000027454,ENSGALG00000017128,ENSGALG00000036892,ENSGALG00000010900,ENSGALG00000014801,ENSGALG00000008014,ENSGALG00000007768,ENSGALG00000001632,ENSGALG00000001491,ENSGALG00000006110,ENSGALG00000024481,ENSGALG00000008233
GO:1990204	oxidoreductase complex	cellular_component	1.29e-06	0.0010028	18	982	75	14096	ENSGALG00000043768,ENSGALG00000002033,ENSGALG00000014155,ENSGALG00000041418,ENSGALG00000005789,ENSGALG00000028026,ENSGALG00000016261,ENSGALG00000042750,ENSGALG00000030436,ENSGALG00000028537,ENSGALG00000042809,ENSGALG00000036853,ENSGALG00000029500,ENSGALG00000009703,ENSGALG00000013191,ENSGALG00000032079,ENSGALG00000016442,ENSGALG00000008066
GO:0005578	proteinaceous extracellular matrix	cellular_component	4.56e-06	0.0023264	33	982	195	14096	ENSGALG00000000839,ENSGALG00000016584,ENSGALG00000008980,ENSGALG00000011623,ENSGALG00000031129,ENSGALG00000002955,ENSGALG00000034456,ENSGALG00000007837,ENSGALG00000020554,ENSGALG00000003473,ENSGALG00000017046,ENSGALG00000011270,ENSGALG00000014804,ENSGALG00000031112,ENSGALG00000039216,ENSGALG00000011200,ENSGALG00000015374,ENSGALG00000003923,ENSGALG00000004960,ENSGALG00000009641,ENSGALG00000011271,…
GO:0000776	kinetochore	cellular_component	8.57e-06	0.0037451	18	982	79	14096	ENSGALG00000003438,ENSGALG00000024481,ENSGALG00000008233,ENSGALG00000031524,ENSGALG00000004515,ENSGALG00000012160,ENSGALG00000027454,ENSGALG00000009690,ENSGALG00000006110,ENSGALG00000005038,ENSGALG00000011683,ENSGALG00000001632,ENSGALG00000017128,ENSGALG00000010900,ENSGALG00000014801,ENSGALG00000015874,ENSGALG00000036892,ENSGALG00000010120
GO:1902495	transmembrane transporter complex	cellular_component	2.31e-05	0.0077294	29	982	179	14096	ENSGALG00000037744,ENSGALG00000003005,ENSGALG00000034109,ENSGALG00000011040,ENSGALG00000005400,ENSGALG00000005215,ENSGALG00000026091,ENSGALG00000009687,ENSGALG00000010029,ENSGALG00000005801,ENSGALG00000002707,ENSGALG00000009919,ENSGALG00000005789,ENSGALG00000041791,ENSGALG00000034895,ENSGALG00000002132,ENSGALG00000034427,ENSGALG00000037138,Novel01866,ENSGALG00000007980,ENSGALG00000039826,ENSGALG0…
GO:0098800	inner mitochondrial membrane protein complex	cellular_component	2.38e-05	0.0077705	18	982	91	14096	ENSGALG00000008066,ENSGALG00000001452,ENSGALG00000009703,ENSGALG00000032465,ENSGALG00000013191,ENSGALG00000041091,ENSGALG00000029500,ENSGALG00000041418,ENSGALG00000042750,ENSGALG00000007205,ENSGALG00000042809,ENSGALG00000028537,ENSGALG00000030436,ENSGALG00000028026,ENSGALG00000005789,ENSGALG00000002033,ENSGALG00000032142,ENSGALG00000043768
GO:0009055	electron carrier activity	molecular_function	5.34e-07	0.00056325	19	982	73	14096	ENSGALG00000032079,ENSGALG00000035144,ENSGALG00000035334,ENSGALG00000008040,ENSGALG00000008701,ENSGALG00000002925,ENSGALG00000002891,Novel02820,Novel01712,Novel01877,ENSGALG00000007205,ENSGALG00000016261,ENSGALG00000032456,ENSGALG00000005034,ENSGALG00000011020,ENSGALG00000032142,ENSGALG00000001096,ENSGALG00000027963,ENSGALG00000027483
GO:0016491	oxidoreductase activity	molecular_function	1.37e-06	0.0010254	74	982	603	14096	ENSGALG00000016555,Novel01877,ENSGALG00000030436,ENSGALG00000026817,Novel02820,ENSGALG00000005077,ENSGALG00000035334,ENSGALG00000032079,ENSGALG00000014155,ENSGALG00000001949,Novel00691,ENSGALG00000027483,Novel01337,Novel00313,ENSGALG00000028026,ENSGALG00000007205,ENSGALG00000016261,Novel00652,ENSGALG00000002855,Novel02767,ENSGALG00000010001,ENSGALG00000004833,ENSGALG00000040426,ENSGALG00000041418…
GO:0003954	NADH dehydrogenase activity	molecular_function	5.19e-06	0.0024803	11	982	33	14096	ENSGALG00000029500,ENSGALG00000043768,ENSGALG00000009703,ENSGALG00000036229,ENSGALG00000041418,Novel02589,ENSGALG00000028026,ENSGALG00000030436,ENSGALG00000028537,ENSGALG00000042750,ENSGALG00000042809

## Sheet: E16 vs 10w
GO_accession	Description	Term_type	Over_represented_pValue	Corrected_pValue	DEG_item	DEG_list	Bg_item	Bg_list	Gene_names
GO:0006955	immune response	biological_process	4.1e-17	7.35e-13	112	1261	559	14096	ENSGALG00000014659,ENSGALG00000032701,ENSGALG00000002507,ENSGALG00000016173,ENSGALG00000023411,ENSGALG00000011094,ENSGALG00000016852,ENSGALG00000010745,ENSGALG00000011889,ENSGALG00000033680,ENSGALG00000016300,ENSGALG00000019696,ENSGALG00000043603,ENSGALG00000014297,ENSGALG00000033932,ENSGALG00000029381,ENSGALG00000007651,ENSGALG00000016564,ENSGALG00000008447,ENSGALG00000002160,ENSGALG00000014561,…
GO:0002376	immune system process	biological_process	5.22e-12	4.68e-08	169	1261	1148	14096	ENSGALG00000010748,ENSGALG00000007416,ENSGALG00000008346,ENSGALG00000002113,ENSGALG00000003857,ENSGALG00000000141,ENSGALG00000029669,ENSGALG00000014585,ENSGALG00000026499,ENSGALG00000012456,ENSGALG00000032717,ENSGALG00000009870,ENSGALG00000031862,ENSGALG00000002192,ENSGALG00000027247,ENSGALG00000006388,ENSGALG00000005919,Novel02414,ENSGALG00000014684,ENSGALG00000038559,ENSGALG00000008127,ENSGALG0…
GO:0048002	antigen processing and presentation of peptide antigen	biological_process	5.07e-10	2.27e-06	14	1261	23	14096	ENSGALG00000008912,ENSGALG00000033932,ENSGALG00000029381,ENSGALG00000033694,ENSGALG00000014684,ENSGALG00000032602,ENSGALG00000014428,ENSGALG00000000775,ENSGALG00000035075,ENSGALG00000002160,ENSGALG00000041380,ENSGALG00000000158,ENSGALG00000033680,ENSGALG00000004594
GO:0019882	antigen processing and presentation	biological_process	1.04e-09	3.72e-06	21	1261	52	14096	ENSGALG00000014684,ENSGALG00000033694,ENSGALG00000008912,ENSGALG00000032602,ENSGALG00000035075,Novel02414,ENSGALG00000030270,Novel00070,ENSGALG00000024049,ENSGALG00000000158,ENSGALG00000004594,ENSGALG00000000162,ENSGALG00000000141,ENSGALG00000033932,ENSGALG00000029381,ENSGALG00000000775,ENSGALG00000002160,ENSGALG00000014428,ENSGALG00000041380,ENSGALG00000038393,ENSGALG00000033680
GO:0002474	antigen processing and presentation of peptide antigen via MHC class I	biological_process	2.05e-09	6.12e-06	11	1261	15	14096	ENSGALG00000014684,ENSGALG00000033694,ENSGALG00000029381,ENSGALG00000033932,ENSGALG00000008912,ENSGALG00000002160,ENSGALG00000032602,ENSGALG00000014428,ENSGALG00000035075,ENSGALG00000041380,ENSGALG00000033680
GO:0050778	positive regulation of immune response	biological_process	1.7e-08	3.81e-05	47	1261	227	14096	ENSGALG00000011889,ENSGALG00000032231,ENSGALG00000011684,ENSGALG00000014297,ENSGALG00000016400,ENSGALG00000029381,ENSGALG00000008447,ENSGALG00000002160,ENSGALG00000014659,ENSGALG00000043650,ENSGALG00000002507,ENSGALG00000032701,ENSGALG00000029270,ENSGALG00000013568,ENSGALG00000023411,ENSGALG00000016173,ENSGALG00000027305,ENSGALG00000021569,ENSGALG00000016852,ENSGALG00000011094,ENSGALG00000016590,…
GO:0002684	positive regulation of immune system process	biological_process	4.38e-08	8.71e-05	65	1261	374	14096	ENSGALG00000011668,ENSGALG00000032231,ENSGALG00000011684,ENSGALG00000013372,ENSGALG00000016400,ENSGALG00000006415,ENSGALG00000043650,ENSGALG00000029270,ENSGALG00000013568,ENSGALG00000027305,ENSGALG00000021569,ENSGALG00000016590,ENSGALG00000005644,ENSGALG00000001486,ENSGALG00000032530,ENSGALG00000012456,ENSGALG00000003863,ENSGALG00000041192,ENSGALG00000006527,ENSGALG00000002452,ENSGALG00000002113,…
GO:0019221	cytokine-mediated signaling pathway	biological_process	2.17e-07	0.00034341	42	1261	208	14096	ENSGALG00000033234,ENSGALG00000024470,ENSGALG00000038069,ENSGALG00000001882,ENSGALG00000012480,ENSGALG00000039982,ENSGALG00000043650,ENSGALG00000005619,ENSGALG00000004221,ENSGALG00000016564,ENSGALG00000016228,ENSGALG00000007651,ENSGALG00000038000,ENSGALG00000043603,ENSGALG00000014297,ENSGALG00000016288,ENSGALG00000013372,ENSGALG00000011684,ENSGALG00000019761,ENSGALG00000032260,ENSGALG00000026663,…
GO:0050776	regulation of immune response	biological_process	2.3e-07	0.00034341	52	1261	286	14096	ENSGALG00000002192,ENSGALG00000007001,ENSGALG00000009870,ENSGALG00000014561,ENSGALG00000034970,ENSGALG00000004594,ENSGALG00000001256,ENSGALG00000015441,ENSGALG00000014603,ENSGALG00000006527,ENSGALG00000003857,ENSGALG00000002113,ENSGALG00000015216,ENSGALG00000007416,ENSGALG00000014508,ENSGALG00000016661,ENSGALG00000001231,ENSGALG00000013748,ENSGALG00000032530,ENSGALG00000013468,ENSGALG00000012456,…
GO:0071345	cellular response to cytokine stimulus	biological_process	7.94e-07	0.0010162	50	1261	280	14096	ENSGALG00000032717,ENSGALG00000043555,ENSGALG00000033087,ENSGALG00000014585,ENSGALG00000012472,ENSGALG00000011222,ENSGALG00000021589,ENSGALG00000006785,ENSGALG00000026499,ENSGALG00000014127,ENSGALG00000033520,ENSGALG00000015216,ENSGALG00000002329,ENSGALG00000016693,ENSGALG00000005638,ENSGALG00000001256,ENSGALG00000008716,ENSGALG00000004594,ENSGALG00000002908,ENSGALG00000016788,ENSGALG00000026663,…
GO:0034097	response to cytokine	biological_process	1.09e-06	0.0011986	53	1261	307	14096	ENSGALG00000016288,ENSGALG00000013372,ENSGALG00000006037,ENSGALG00000014297,ENSGALG00000043603,ENSGALG00000011684,ENSGALG00000019761,ENSGALG00000006491,ENSGALG00000032260,ENSGALG00000011668,ENSGALG00000026663,ENSGALG00000015967,ENSGALG00000010175,ENSGALG00000005619,ENSGALG00000004221,ENSGALG00000016564,ENSGALG00000016228,ENSGALG00000007651,ENSGALG00000038000,ENSGALG00000014442,ENSGALG00000039682,…
GO:0071346	cellular response to interferon-gamma	biological_process	2.02e-06	0.0018092	13	1261	33	14096	ENSGALG00000014585,ENSGALG00000012480,ENSGALG00000006785,ENSGALG00000001256,ENSGALG00000043603,ENSGALG00000014442,ENSGALG00000014127,ENSGALG00000026663,ENSGALG00000032717,ENSGALG00000010175,ENSGALG00000024470,ENSGALG00000002329,ENSGALG00000007651
GO:0002253	activation of immune response	biological_process	2.53e-06	0.0021561	33	1261	158	14096	ENSGALG00000013468,ENSGALG00000006785,ENSGALG00000041192,ENSGALG00000002113,ENSGALG00000003857,ENSGALG00000016661,ENSGALG00000015216,ENSGALG00000014508,ENSGALG00000007416,ENSGALG00000014561,ENSGALG00000014603,ENSGALG00000015441,ENSGALG00000002192,ENSGALG00000007001,ENSGALG00000032231,ENSGALG00000011889,ENSGALG00000011684,ENSGALG00000014297,ENSGALG00000016400,ENSGALG00000043650,ENSGALG00000014659,…
GO:0002443	leukocyte mediated immunity	biological_process	4.12e-06	0.0033594	28	1261	126	14096	ENSGALG00000021569,ENSGALG00000038559,ENSGALG00000005644,ENSGALG00000001486,ENSGALG00000007001,ENSGALG00000029270,ENSGALG00000014561,ENSGALG00000014659,ENSGALG00000004594,ENSGALG00000013568,ENSGALG00000006527,ENSGALG00000027973,ENSGALG00000016400,ENSGALG00000029381,ENSGALG00000002160,ENSGALG00000010748,ENSGALG00000015216,ENSGALG00000008447,ENSGALG00000006415,ENSGALG00000013748,ENSGALG00000032530,…
GO:0006952	defense response	biological_process	6.69e-06	0.0043146	89	1261	625	14096	ENSGALG00000006527,ENSGALG00000020386,ENSGALG00000003857,ENSGALG00000001231,Novel01247,ENSGALG00000000783,ENSGALG00000011291,ENSGALG00000022815,ENSGALG00000032717,Novel00799,ENSGALG00000029354,ENSGALG00000041192,ENSGALG00000014585,ENSGALG00000005757,ENSGALG00000003863,ENSGALG00000026499,ENSGALG00000032184,ENSGALG00000009870,ENSGALG00000004930,ENSGALG00000001780,ENSGALG00000027512,ENSGALG000000166…
GO:0032728	positive regulation of interferon-beta production	biological_process	6.74e-06	0.0043146	8	1261	14	14096	ENSGALG00000013468,ENSGALG00000015094,ENSGALG00000041192,ENSGALG00000014297,ENSGALG00000006785,ENSGALG00000010745,ENSGALG00000016590,ENSGALG00000007001
GO:0034341	response to interferon-gamma	biological_process	8.76e-06	0.0052984	13	1261	37	14096	ENSGALG00000007651,ENSGALG00000024470,ENSGALG00000002329,ENSGALG00000026663,ENSGALG00000010175,ENSGALG00000032717,ENSGALG00000006785,ENSGALG00000012480,ENSGALG00000014585,ENSGALG00000014127,ENSGALG00000043603,ENSGALG00000001256,ENSGALG00000014442
GO:0032648	regulation of interferon-beta production	biological_process	1.18e-05	0.0062412	10	1261	23	14096	ENSGALG00000014297,ENSGALG00000041192,ENSGALG00000012480,ENSGALG00000006785,ENSGALG00000013468,ENSGALG00000015094,ENSGALG00000007001,ENSGALG00000016590,ENSGALG00000010745,ENSGALG00000002908
GO:0032392	DNA geometric change	biological_process	1.31e-05	0.0067311	11	1261	28	14096	ENSGALG00000006037,ENSGALG00000012546,ENSGALG00000012969,ENSGALG00000010745,ENSGALG00000016676,ENSGALG00000008538,ENSGALG00000004037,ENSGALG00000033063,ENSGALG00000001616,ENSGALG00000030313,ENSGALG00000009032
GO:0045321	leukocyte activation	biological_process	1.41e-05	0.0070391	58	1261	371	14096	ENSGALG00000013372,ENSGALG00000043603,ENSGALG00000007121,ENSGALG00000011684,ENSGALG00000035094,ENSGALG00000016564,ENSGALG00000038000,ENSGALG00000016400,ENSGALG00000002160,ENSGALG00000006415,ENSGALG00000029270,ENSGALG00000025948,ENSGALG00000013086,ENSGALG00000004096,ENSGALG00000023411,ENSGALG00000013568,ENSGALG00000003473,ENSGALG00000008014,ENSGALG00000034973,ENSGALG00000005451,ENSGALG00000001486,…
GO:0032481	positive regulation of type I interferon production	biological_process	1.51e-05	0.0072534	9	1261	19	14096	ENSGALG00000006785,ENSGALG00000041192,ENSGALG00000014297,ENSGALG00000015094,ENSGALG00000013468,ENSGALG00000016590,ENSGALG00000010745,ENSGALG00000015216,ENSGALG00000007001
GO:0032479	regulation of type I interferon production	biological_process	1.54e-05	0.0072534	11	1261	28	14096	ENSGALG00000013468,ENSGALG00000015094,ENSGALG00000041192,ENSGALG00000014297,ENSGALG00000006785,ENSGALG00000012480,ENSGALG00000002908,ENSGALG00000010745,ENSGALG00000016590,ENSGALG00000015216,ENSGALG00000007001
GO:0045087	innate immune response	biological_process	1.64e-05	0.0075411	39	1261	218	14096	ENSGALG00000027973,ENSGALG00000006527,ENSGALG00000001231,ENSGALG00000015216,ENSGALG00000016661,ENSGALG00000002329,ENSGALG00000013356,ENSGALG00000003857,ENSGALG00000032717,ENSGALG00000013468,ENSGALG00000013748,ENSGALG00000014585,ENSGALG00000006785,ENSGALG00000041192,ENSGALG00000014127,ENSGALG00000007001,ENSGALG00000014561,ENSGALG00000001256,ENSGALG00000016400,ENSGALG00000016564,ENSGALG00000007651,…
GO:0002757	immune response-activating signal transduction	biological_process	1.78e-05	0.0077068	28	1261	136	14096	ENSGALG00000006785,ENSGALG00000011684,ENSGALG00000014297,ENSGALG00000041192,ENSGALG00000011889,ENSGALG00000013468,ENSGALG00000003857,ENSGALG00000002113,ENSGALG00000007416,ENSGALG00000015216,ENSGALG00000016661,ENSGALG00000014508,ENSGALG00000016400,ENSGALG00000013568,ENSGALG00000027305,ENSGALG00000016173,ENSGALG00000023411,ENSGALG00000015441,ENSGALG00000014561,ENSGALG00000043650,ENSGALG00000029270,…
GO:0032508	DNA duplex unwinding	biological_process	1.82e-05	0.0077068	10	1261	24	14096	ENSGALG00000012546,ENSGALG00000006037,ENSGALG00000033063,ENSGALG00000001616,ENSGALG00000030313,ENSGALG00000009032,ENSGALG00000012969,ENSGALG00000016676,ENSGALG00000008538,ENSGALG00000004037
GO:0032608	interferon-beta production	biological_process	1.85e-05	0.0077068	10	1261	24	14096	ENSGALG00000013468,ENSGALG00000015094,ENSGALG00000014297,ENSGALG00000041192,ENSGALG00000012480,ENSGALG00000006785,ENSGALG00000002908,ENSGALG00000007001,ENSGALG00000010745,ENSGALG00000016590
GO:0042611	MHC protein complex	cellular_component	1.32e-10	7.86e-07	11	1261	13	14096	ENSGALG00000000141,ENSGALG00000033932,ENSGALG00000032602,ENSGALG00000002160,Novel02414,ENSGALG00000041380,ENSGALG00000038393,ENSGALG00000000158,ENSGALG00000004594,ENSGALG00000000162,ENSGALG00000033680
GO:0044459	plasma membrane part	cellular_component	4.18e-09	1.07e-05	169	1261	1245	14096	ENSGALG00000032602,ENSGALG00000001486,ENSGALG00000012847,ENSGALG00000021567,ENSGALG00000014742,ENSGALG00000006635,ENSGALG00000002132,ENSGALG00000012160,ENSGALG00000015055,ENSGALG00000009759,ENSGALG00000036093,ENSGALG00000005258,ENSGALG00000007511,Novel01866,ENSGALG00000042866,ENSGALG00000038042,ENSGALG00000037387,ENSGALG00000014496,ENSGALG00000012322,ENSGALG00000005672,ENSGALG00000015032,ENSGALG0…
GO:0000775	chromosome, centromeric region	cellular_component	8.07e-08	0.00014463	30	1261	116	14096	ENSGALG00000015363,ENSGALG00000027454,ENSGALG00000011914,ENSGALG00000010900,ENSGALG00000009722,ENSGALG00000024481,ENSGALG00000036856,ENSGALG00000014801,ENSGALG00000031524,ENSGALG00000009690,ENSGALG00000008014,ENSGALG00000017128,ENSGALG00000008233,ENSGALG00000005451,ENSGALG00000015874,ENSGALG00000009854,ENSGALG00000037735,Novel03288,ENSGALG00000036892,ENSGALG00000006110,ENSGALG00000011967,ENSGALG0…
GO:0098687	chromosomal region	cellular_component	1.04e-06	0.0011986	40	1261	199	14096	ENSGALG00000016676,ENSGALG00000006110,Novel03288,ENSGALG00000037735,ENSGALG00000036892,ENSGALG00000017128,ENSGALG00000008014,ENSGALG00000005451,ENSGALG00000015874,ENSGALG00000003438,ENSGALG00000007768,ENSGALG00000012160,ENSGALG00000013086,ENSGALG00000011967,ENSGALG00000012546,ENSGALG00000002116,ENSGALG00000004037,ENSGALG00000015363,ENSGALG00000030313,ENSGALG00000031524,ENSGALG00000014801,ENSGALG0…
GO:0042101	T cell receptor complex	cellular_component	1.14e-06	0.0011986	8	1261	12	14096	ENSGALG00000001486,ENSGALG00000007416,ENSGALG00000015216,ENSGALG00000007418,ENSGALG00000014754,ENSGALG00000027305,ENSGALG00000015441,ENSGALG00000014561
GO:0000776	kinetochore	cellular_component	1.22e-06	0.001217	22	1261	79	14096	ENSGALG00000006110,ENSGALG00000009854,ENSGALG00000037735,Novel03288,ENSGALG00000036892,ENSGALG00000017128,ENSGALG00000008233,ENSGALG00000015874,ENSGALG00000009690,ENSGALG00000003438,ENSGALG00000005038,ENSGALG00000001632,ENSGALG00000010120,ENSGALG00000012160,ENSGALG00000011967,ENSGALG00000010900,ENSGALG00000027454,ENSGALG00000014801,ENSGALG00000031524,ENSGALG00000036856,ENSGALG00000024481,ENSGALG0…
GO:0000779	condensed chromosome, centromeric region	cellular_component	1.41e-06	0.0013316	13	1261	31	14096	ENSGALG00000008014,ENSGALG00000017128,ENSGALG00000008233,Novel03288,ENSGALG00000037735,ENSGALG00000036892,ENSGALG00000010900,ENSGALG00000027454,ENSGALG00000006110,ENSGALG00000024481,ENSGALG00000014801,ENSGALG00000007768,ENSGALG00000001632
GO:0042612	MHC class I protein complex	cellular_component	4.85e-06	0.00378	5	1261	5	14096	ENSGALG00000033680,ENSGALG00000002160,ENSGALG00000032602,ENSGALG00000033932,ENSGALG00000041380
GO:0005886	plasma membrane	cellular_component	5.1e-06	0.0038112	258	1261	2251	14096	ENSGALG00000010029,ENSGALG00000039628,ENSGALG00000003005,ENSGALG00000009719,ENSGALG00000004721,ENSGALG00000015441,ENSGALG00000033231,ENSGALG00000038559,ENSGALG00000002958,ENSGALG00000036258,ENSGALG00000017085,ENSGALG00000014684,Novel02414,ENSGALG00000006388,Novel01361,ENSGALG00000000783,ENSGALG00000026499,ENSGALG00000021128,ENSGALG00000015551,ENSGALG00000001282,ENSGALG00000011319,Novel01595,ENSGA…
GO:0071944	cell periphery	cellular_component	6.37e-06	0.0043146	267	1261	2347	14096	ENSGALG00000016590,ENSGALG00000032749,ENSGALG00000003911,Novel02067,ENSGALG00000027305,ENSGALG00000043025,ENSGALG00000012913,ENSGALG00000015233,ENSGALG00000017229,ENSGALG00000015079,ENSGALG00000010200,ENSGALG00000035094,ENSGALG00000037744,ENSGALG00000010595,ENSGALG00000016288,ENSGALG00000002744,ENSGALG00000002287,ENSGALG00000028341,ENSGALG00000002982,ENSGALG00000026572,ENSGALG00000026091,ENSGALG0…
GO:0000777	condensed chromosome kinetochore	cellular_component	8.87e-06	0.0052984	11	1261	26	14096	ENSGALG00000024481,ENSGALG00000001632,ENSGALG00000014801,ENSGALG00000008233,ENSGALG00000017128,ENSGALG00000036892,Novel03288,ENSGALG00000037735,ENSGALG00000006110,ENSGALG00000027454,ENSGALG00000010900
GO:0042613	MHC class II protein complex	cellular_component	1.01e-05	0.0054817	6	1261	8	14096	ENSGALG00000000158,ENSGALG00000038393,ENSGALG00000000141,Novel02414,ENSGALG00000000162,ENSGALG00000004594
GO:0031226	intrinsic component of plasma membrane	cellular_component	1.82e-05	0.0077068	98	1261	728	14096	ENSGALG00000015551,ENSGALG00000041730,ENSGALG00000010068,ENSGALG00000002452,ENSGALG00000038141,ENSGALG00000006527,ENSGALG00000003863,ENSGALG00000021589,ENSGALG00000026499,ENSGALG00000027240,ENSGALG00000033908,ENSGALG00000000783,ENSGALG00000006421,Novel01361,ENSGALG00000005258,Novel01866,ENSGALG00000007511,ENSGALG00000042866,ENSGALG00000017085,ENSGALG00000004721,ENSGALG00000038042,ENSGALG000000100…
GO:0000780	condensed nuclear chromosome, centromeric region	cellular_component	2.2e-05	0.0087466	7	1261	11	14096	ENSGALG00000008233,ENSGALG00000014801,ENSGALG00000007768,ENSGALG00000006110,Novel03288,ENSGALG00000036892,ENSGALG00000037735
GO:0003823	antigen binding	molecular_function	3.37e-07	0.00046516	12	1261	25	14096	ENSGALG00000015233,ENSGALG00000030270,ENSGALG00000001992,ENSGALG00000002113,ENSGALG00000032602,ENSGALG00000033932,ENSGALG00000033680,ENSGALG00000004594,ENSGALG00000011715,ENSGALG00000041380,ENSGALG00000010175,ENSGALG00000000158
GO:0008009	chemokine activity	molecular_function	5.64e-06	0.0040465	10	1261	22	14096	ENSGALG00000034478,ENSGALG00000024470,ENSGALG00000002329,ENSGALG00000026663,ENSGALG00000032717,ENSGALG00000011668,ENSGALG00000015235,Novel01592,ENSGALG00000014585,ENSGALG00000043603
GO:0042379	chemokine receptor binding	molecular_function	9.21e-06	0.0053258	10	1261	23	14096	ENSGALG00000024470,ENSGALG00000002329,ENSGALG00000034478,ENSGALG00000014585,ENSGALG00000043603,ENSGALG00000011668,ENSGALG00000026663,ENSGALG00000032717,Novel01592,ENSGALG00000015235
GO:0004872	receptor activity	molecular_function	1.01e-05	0.0054817	101	1261	740	14096	ENSGALG00000028895,ENSGALG00000016693,ENSGALG00000014561,ENSGALG00000002840,ENSGALG00000004841,ENSGALG00000004594,ENSGALG00000040938,ENSGALG00000039196,ENSGALG00000005476,ENSGALG00000037166,ENSGALG00000009405,ENSGALG00000001698,ENSGALG00000002707,ENSGALG00000007001,ENSGALG00000016788,ENSGALG00000005156,ENSGALG00000013748,ENSGALG00000013468,ENSGALG00000012216,ENSGALG00000002299,ENSGALG00000012472,…
GO:0023023	MHC protein complex binding	molecular_function	2.14e-05	0.0087348	7	1261	12	14096	ENSGALG00000015233,ENSGALG00000001992,ENSGALG00000004594,ENSGALG00000002113,ENSGALG00000011715,ENSGALG00000010175,ENSGALG00000000158

## Sheet: 1d vs 10w
Table S4 Detailed information on the DEGs identified in six comparisons: E12 vs. E16, E12 vs. 1 d, E12 vs. 10 w, E16 vs. 1 d, E16 vs. 10 w and 1 d vs. 10 w
GO_accession	Description	Term_type	Over_represented_pValue	Corrected_pValue	DEG_item	DEG_list	Bg_item	Bg_list	Gene_names
GO:0006955	immune response	biological_process	7.59e-38	1.36e-33	105	630	559	14096	ENSGALG00000011668,ENSGALG00000016852,ENSGALG00000000775,ENSGALG00000013568,ENSGALG00000016661,ENSGALG00000040926,ENSGALG00000023411,ENSGALG00000016173,ENSGALG00000006785,ENSGALG00000032717,ENSGALG00000021569,Novel00070,ENSGALG00000001256,ENSGALG00000030270,ENSGALG00000034970,ENSGALG00000032530,ENSGALG00000023622,ENSGALG00000032701,ENSGALG00000027247,ENSGALG00000003857,ENSGALG00000037077,ENSGALG0…
GO:0002376	immune system process	biological_process	9.43e-32	8.45e-28	144	630	1148	14096	ENSGALG00000000141,ENSGALG00000003792,ENSGALG00000032231,ENSGALG00000008447,ENSGALG00000026163,ENSGALG00000014585,ENSGALG00000014267,ENSGALG00000038000,ENSGALG00000005937,ENSGALG00000031862,ENSGALG00000013372,ENSGALG00000005919,ENSGALG00000016022,Novel01202,ENSGALG00000041192,Novel02414,ENSGALG00000035733,ENSGALG00000021139,ENSGALG00000001882,ENSGALG00000014603,ENSGALG00000005757,ENSGALG000000349…
GO:0002684	positive regulation of immune system process	biological_process	8.77e-22	5.24e-18	65	630	374	14096	ENSGALG00000032530,ENSGALG00000034970,ENSGALG00000001256,ENSGALG00000003857,ENSGALG00000037077,ENSGALG00000032701,ENSGALG00000012755,ENSGALG00000016852,ENSGALG00000011668,ENSGALG00000006785,ENSGALG00000016173,ENSGALG00000023411,ENSGALG00000013568,ENSGALG00000016661,ENSGALG00000021569,ENSGALG00000029381,ENSGALG00000037437,ENSGALG00000043650,ENSGALG00000009388,ENSGALG00000004771,ENSGALG00000033520,…
GO:0050778	positive regulation of immune response	biological_process	2.94e-16	1.32e-12	43	630	227	14096	ENSGALG00000003863,ENSGALG00000003857,ENSGALG00000032701,ENSGALG00000003580,ENSGALG00000008447,ENSGALG00000004594,ENSGALG00000002192,ENSGALG00000032231,ENSGALG00000006527,ENSGALG00000032530,ENSGALG00000034970,ENSGALG00000001256,ENSGALG00000012830,ENSGALG00000001486,ENSGALG00000021569,ENSGALG00000016852,ENSGALG00000014659,ENSGALG00000006785,ENSGALG00000041192,ENSGALG00000016173,ENSGALG00000023411,…
GO:0045321	leukocyte activation	biological_process	4.8e-16	1.72e-12	56	630	371	14096	ENSGALG00000000466,ENSGALG00000007121,ENSGALG00000013481,ENSGALG00000031735,ENSGALG00000009626,ENSGALG00000002113,ENSGALG00000039228,ENSGALG00000012456,ENSGALG00000016400,ENSGALG00000016986,ENSGALG00000034975,ENSGALG00000008127,ENSGALG00000015216,ENSGALG00000007001,ENSGALG00000037943,ENSGALG00000033278,ENSGALG00000015032,ENSGALG00000035386,ENSGALG00000014561,ENSGALG00000038559,Novel01201,ENSGALG0…
GO:0019882	antigen processing and presentation	biological_process	1.68e-15	4.55e-12	21	630	52	14096	Novel02414,ENSGALG00000002160,ENSGALG00000000162,ENSGALG00000035733,ENSGALG00000043052,ENSGALG00000000141,ENSGALG00000033694,ENSGALG00000004594,ENSGALG00000000158,Novel00070,ENSGALG00000029381,ENSGALG00000024049,ENSGALG00000030270,ENSGALG00000009626,ENSGALG00000038393,ENSGALG00000032602,ENSGALG00000041380,ENSGALG00000033932,ENSGALG00000035075,ENSGALG00000009520,ENSGALG00000000775
GO:0002682	regulation of immune system process	biological_process	1.89e-15	4.55e-12	74	630	614	14096	ENSGALG00000001256,ENSGALG00000034970,ENSGALG00000032530,ENSGALG00000022750,ENSGALG00000032701,ENSGALG00000037077,ENSGALG00000003857,ENSGALG00000004974,ENSGALG00000012755,ENSGALG00000011668,ENSGALG00000016852,ENSGALG00000013568,ENSGALG00000016661,ENSGALG00000040926,ENSGALG00000039458,ENSGALG00000023411,ENSGALG00000016173,ENSGALG00000006785,ENSGALG00000021569,ENSGALG00000029354,ENSGALG00000009388,…
GO:0050776	regulation of immune response	biological_process	3.77e-15	6.75e-12	47	630	286	14096	ENSGALG00000016590,ENSGALG00000013468,ENSGALG00000005547,ENSGALG00000002113,ENSGALG00000005644,ENSGALG00000016400,ENSGALG00000012456,ENSGALG00000015216,ENSGALG00000007001,ENSGALG00000037943,ENSGALG00000014603,ENSGALG00000035386,ENSGALG00000014561,ENSGALG00000035733,ENSGALG00000004771,ENSGALG00000002160,ENSGALG00000029270,ENSGALG00000007416,ENSGALG00000029381,ENSGALG00000043650,ENSGALG00000009388,…
GO:0050896	response to stimulus	biological_process	2.1e-14	2.9e-11	298	630	4710	14096	ENSGALG00000038393,ENSGALG00000016293,ENSGALG00000009626,ENSGALG00000019761,ENSGALG00000004960,ENSGALG00000040557,ENSGALG00000012456,ENSGALG00000016986,ENSGALG00000021238,Novel03025,ENSGALG00000014206,ENSGALG00000043603,ENSGALG00000010156,ENSGALG00000026995,Novel00689,ENSGALG00000006511,ENSGALG00000007418,ENSGALG00000029354,ENSGALG00000019261,ENSGALG00000043372,ENSGALG00000035505,ENSGALG000000118…
GO:0046649	lymphocyte activation	biological_process	5.17e-14	5.6e-11	49	630	328	14096	ENSGALG00000015032,ENSGALG00000014561,ENSGALG00000035386,ENSGALG00000038559,Novel01201,ENSGALG00000035733,ENSGALG00000002160,ENSGALG00000043603,ENSGALG00000029270,ENSGALG00000016564,ENSGALG00000007416,ENSGALG00000012442,ENSGALG00000007579,ENSGALG00000037437,ENSGALG00000000466,ENSGALG00000007121,ENSGALG00000013481,ENSGALG00000031735,ENSGALG00000039228,ENSGALG00000016400,ENSGALG00000012456,ENSGALG0…
GO:0007159	leukocyte cell-cell adhesion	biological_process	8.45e-14	8.27e-11	41	630	240	14096	ENSGALG00000039228,ENSGALG00000016986,ENSGALG00000012456,ENSGALG00000016400,ENSGALG00000034975,ENSGALG00000015216,ENSGALG00000033278,ENSGALG00000000466,ENSGALG00000007121,ENSGALG00000031735,ENSGALG00000007416,ENSGALG00000007579,ENSGALG00000037437,ENSGALG00000023689,ENSGALG00000007511,ENSGALG00000015032,ENSGALG00000035386,ENSGALG00000014561,ENSGALG00000038559,ENSGALG00000035733,ENSGALG00000002160,…
GO:0001775	cell activation	biological_process	8.76e-14	8.27e-11	58	630	443	14096	ENSGALG00000043603,ENSGALG00000029270,ENSGALG00000033520,ENSGALG00000002160,ENSGALG00000035733,Novel01201,ENSGALG00000038559,ENSGALG00000015032,ENSGALG00000035386,ENSGALG00000014561,ENSGALG00000037437,ENSGALG00000007579,ENSGALG00000012442,Novel00689,ENSGALG00000007416,ENSGALG00000016564,ENSGALG00000031735,ENSGALG00000009626,ENSGALG00000013481,ENSGALG00000007121,ENSGALG00000000466,ENSGALG000000332…
GO:0002253	activation of immune response	biological_process	2.5e-13	2.13e-10	32	630	158	14096	ENSGALG00000021569,ENSGALG00000001486,ENSGALG00000012830,ENSGALG00000016173,ENSGALG00000023411,ENSGALG00000014659,ENSGALG00000041192,ENSGALG00000006785,ENSGALG00000016661,ENSGALG00000013568,ENSGALG00000003857,ENSGALG00000032701,ENSGALG00000032231,ENSGALG00000002192,ENSGALG00000016590,ENSGALG00000013468,ENSGALG00000005547,ENSGALG00000002113,ENSGALG00000005644,ENSGALG00000016400,ENSGALG00000007001,…
GO:0070486	leukocyte aggregation	biological_process	2.85e-13	2.32e-10	39	630	227	14096	ENSGALG00000003857,ENSGALG00000003863,ENSGALG00000027247,ENSGALG00000012755,ENSGALG00000004594,ENSGALG00000032530,ENSGALG00000026163,ENSGALG00000002080,ENSGALG00000022750,ENSGALG00000034970,ENSGALG00000006415,ENSGALG00000012830,ENSGALG00000001486,ENSGALG00000031862,ENSGALG00000016852,ENSGALG00000006785,ENSGALG00000013568,ENSGALG00000013372,ENSGALG00000002160,ENSGALG00000035733,ENSGALG00000029270,…
GO:0019221	cytokine-mediated signaling pathway	biological_process	4.95e-13	3.86e-10	37	630	208	14096	ENSGALG00000014585,ENSGALG00000032717,ENSGALG00000038000,ENSGALG00000016693,ENSGALG00000011733,ENSGALG00000011668,ENSGALG00000006785,ENSGALG00000040553,ENSGALG00000005619,ENSGALG00000013372,ENSGALG00000010628,ENSGALG00000037077,ENSGALG00000004974,ENSGALG00000039982,ENSGALG00000013869,ENSGALG00000004594,ENSGALG00000026163,ENSGALG00000001256,ENSGALG00000019761,ENSGALG00000015216,ENSGALG00000005725,…
GO:0042110	T cell activation	biological_process	6.68e-13	4.79e-10	38	630	222	14096	ENSGALG00000027247,ENSGALG00000003857,ENSGALG00000003863,ENSGALG00000012755,ENSGALG00000004594,ENSGALG00000006415,ENSGALG00000034970,ENSGALG00000026163,ENSGALG00000032530,ENSGALG00000002080,ENSGALG00000022750,ENSGALG00000012830,ENSGALG00000001486,ENSGALG00000031862,ENSGALG00000016852,ENSGALG00000013372,ENSGALG00000006785,ENSGALG00000043603,ENSGALG00000029270,ENSGALG00000002160,ENSGALG00000035733,…
GO:0070489	T cell aggregation	biological_process	6.68e-13	4.79e-10	38	630	222	14096	ENSGALG00000002160,ENSGALG00000035733,ENSGALG00000029270,ENSGALG00000043603,ENSGALG00000038559,ENSGALG00000014561,ENSGALG00000015032,ENSGALG00000035386,ENSGALG00000007579,ENSGALG00000037437,ENSGALG00000007416,ENSGALG00000031735,ENSGALG00000000466,ENSGALG00000007121,ENSGALG00000015216,ENSGALG00000034975,ENSGALG00000033278,ENSGALG00000039228,ENSGALG00000016400,ENSGALG00000016986,ENSGALG00000012456,…
GO:0071593	lymphocyte aggregation	biological_process	7.59e-13	5.23e-10	38	630	223	14096	ENSGALG00000003857,ENSGALG00000003863,ENSGALG00000027247,ENSGALG00000012755,ENSGALG00000004594,ENSGALG00000002080,ENSGALG00000026163,ENSGALG00000032530,ENSGALG00000022750,ENSGALG00000006415,ENSGALG00000034970,ENSGALG00000012830,ENSGALG00000001486,ENSGALG00000016852,ENSGALG00000031862,ENSGALG00000006785,ENSGALG00000013372,ENSGALG00000002160,ENSGALG00000035733,ENSGALG00000043603,ENSGALG00000029270,…
GO:0071345	cellular response to cytokine stimulus	biological_process	9.33e-13	6.19e-10	43	630	280	14096	ENSGALG00000036627,ENSGALG00000043650,ENSGALG00000023193,ENSGALG00000032260,ENSGALG00000002329,ENSGALG00000016564,ENSGALG00000039682,ENSGALG00000024470,ENSGALG00000029270,ENSGALG00000043603,ENSGALG00000039080,ENSGALG00000005638,ENSGALG00000035733,ENSGALG00000033520,ENSGALG00000001882,ENSGALG00000033234,ENSGALG00000033087,ENSGALG00000005725,ENSGALG00000012472,ENSGALG00000015216,ENSGALG00000016788,…
GO:0034097	response to cytokine	biological_process	1.44e-12	9.22e-10	45	630	307	14096	ENSGALG00000023193,ENSGALG00000036627,ENSGALG00000043650,ENSGALG00000024470,ENSGALG00000016564,ENSGALG00000039682,ENSGALG00000002329,ENSGALG00000032260,ENSGALG00000033520,ENSGALG00000035733,ENSGALG00000005638,ENSGALG00000043603,ENSGALG00000029270,ENSGALG00000039080,ENSGALG00000033234,ENSGALG00000015032,ENSGALG00000001882,ENSGALG00000015216,ENSGALG00000012472,ENSGALG00000005725,ENSGALG00000033087,…
GO:0048584	positive regulation of response to stimulus	biological_process	8.43e-12	5.04e-09	94	630	1033	14096	ENSGALG00000011668,ENSGALG00000000839,ENSGALG00000033510,ENSGALG00000016852,ENSGALG00000013568,ENSGALG00000016661,ENSGALG00000006785,ENSGALG00000039458,ENSGALG00000023411,ENSGALG00000016173,ENSGALG00000028821,ENSGALG00000008177,ENSGALG00000032717,ENSGALG00000021569,Novel01265,ENSGALG00000034970,ENSGALG00000012594,ENSGALG00000031997,ENSGALG00000001256,ENSGALG00000041043,ENSGALG00000011008,ENSGALG0…
GO:0002252	immune effector process	biological_process	1.59e-11	8.84e-09	45	630	332	14096	ENSGALG00000016590,ENSGALG00000013468,ENSGALG00000015216,ENSGALG00000007001,ENSGALG00000034975,ENSGALG00000035325,ENSGALG00000005644,ENSGALG00000016986,ENSGALG00000012456,ENSGALG00000016400,ENSGALG00000002160,ENSGALG00000004771,ENSGALG00000029270,ENSGALG00000038559,ENSGALG00000014603,ENSGALG00000014561,ENSGALG00000013723,ENSGALG00000007579,ENSGALG00000012442,ENSGALG00000009388,ENSGALG00000029381,…
GO:0007165	signal transduction	biological_process	1.63e-11	8.84e-09	209	630	3130	14096	ENSGALG00000011203,ENSGALG00000003144,ENSGALG00000008439,ENSGALG00000039982,ENSGALG00000004974,ENSGALG00000021143,ENSGALG00000037077,ENSGALG00000010628,ENSGALG00000003857,ENSGALG00000005524,ENSGALG00000032701,ENSGALG00000004958,ENSGALG00000017003,ENSGALG00000004167,ENSGALG00000034970,ENSGALG00000024049,ENSGALG00000031997,ENSGALG00000001256,ENSGALG00000012594,ENSGALG00000001149,ENSGALG00000008072,…
GO:0002521	leukocyte differentiation	biological_process	1.88e-11	9.9e-09	41	630	285	14096	ENSGALG00000006415,ENSGALG00000032530,ENSGALG00000026163,ENSGALG00000002080,ENSGALG00000022750,ENSGALG00000004594,ENSGALG00000004974,ENSGALG00000013086,ENSGALG00000027247,ENSGALG00000035516,ENSGALG00000003857,ENSGALG00000013372,ENSGALG00000016022,ENSGALG00000029669,ENSGALG00000026525,ENSGALG00000006785,ENSGALG00000031862,ENSGALG00000001486,ENSGALG00000012830,ENSGALG00000007416,ENSGALG00000016564,…
GO:0034109	homotypic cell-cell adhesion	biological_process	5.54e-11	2.84e-08	39	630	269	14096	ENSGALG00000006785,ENSGALG00000013568,ENSGALG00000013372,ENSGALG00000031862,ENSGALG00000016852,ENSGALG00000001486,ENSGALG00000012830,ENSGALG00000002080,ENSGALG00000026163,ENSGALG00000032530,ENSGALG00000022750,ENSGALG00000034970,ENSGALG00000006415,ENSGALG00000004594,ENSGALG00000012755,ENSGALG00000003857,ENSGALG00000003863,ENSGALG00000027247,ENSGALG00000039228,ENSGALG00000016986,ENSGALG00000012456,…
GO:0006935	chemotaxis	biological_process	8.38e-11	4.17e-08	42	630	313	14096	ENSGALG00000038069,ENSGALG00000012456,ENSGALG00000011309,ENSGALG00000015216,ENSGALG00000005725,ENSGALG00000009626,ENSGALG00000006346,ENSGALG00000024470,ENSGALG00000016564,ENSGALG00000010490,ENSGALG00000002329,ENSGALG00000026995,ENSGALG00000036627,ENSGALG00000021567,ENSGALG00000037437,ENSGALG00000006388,ENSGALG00000035386,ENSGALG00000007511,ENSGALG00000035733,ENSGALG00000042812,ENSGALG00000029270,…
GO:0001816	cytokine production	biological_process	1.04e-10	5.04e-08	41	630	302	14096	ENSGALG00000016400,ENSGALG00000003217,ENSGALG00000002113,ENSGALG00000033278,ENSGALG00000005725,ENSGALG00000007001,ENSGALG00000015216,ENSGALG00000013468,ENSGALG00000023517,ENSGALG00000016590,ENSGALG00000009626,ENSGALG00000007416,ENSGALG00000005757,ENSGALG00000027512,ENSGALG00000015032,ENSGALG00000035386,ENSGALG00000014858,ENSGALG00000029270,ENSGALG00000035733,ENSGALG00000002160,ENSGALG00000013568,…
GO:0042330	taxis	biological_process	1.09e-10	5.12e-08	42	630	316	14096	ENSGALG00000013568,ENSGALG00000004128,ENSGALG00000018998,ENSGALG00000031862,ENSGALG00000011733,ENSGALG00000011668,ENSGALG00000038000,ENSGALG00000000839,ENSGALG00000015422,ENSGALG00000032717,ENSGALG00000014585,ENSGALG00000022750,ENSGALG00000034478,ENSGALG00000026163,ENSGALG00000002080,ENSGALG00000034970,ENSGALG00000004594,ENSGALG00000000783,ENSGALG00000037077,ENSGALG00000007806,ENSGALG00000011309,…
GO:1903039	positive regulation of leukocyte cell-cell adhesion	biological_process	1.43e-10	6.55e-08	20	630	78	14096	ENSGALG00000037437,ENSGALG00000004594,ENSGALG00000034970,ENSGALG00000006415,ENSGALG00000007416,ENSGALG00000026163,ENSGALG00000032530,ENSGALG00000029270,ENSGALG00000043603,ENSGALG00000035733,ENSGALG00000015032,ENSGALG00000012755,ENSGALG00000035386,ENSGALG00000016852,ENSGALG00000015216,ENSGALG00000013372,ENSGALG00000013568,ENSGALG00000031735,ENSGALG00000001486,ENSGALG00000000466
GO:0034112	positive regulation of homotypic cell-cell adhesion	biological_process	1.85e-10	8.28e-08	20	630	79	14096	ENSGALG00000013372,ENSGALG00000013568,ENSGALG00000016852,ENSGALG00000015216,ENSGALG00000000466,ENSGALG00000001486,ENSGALG00000031735,ENSGALG00000026163,ENSGALG00000007416,ENSGALG00000032530,ENSGALG00000006415,ENSGALG00000034970,ENSGALG00000004594,ENSGALG00000037437,ENSGALG00000012755,ENSGALG00000015032,ENSGALG00000035386,ENSGALG00000035733,ENSGALG00000043603,ENSGALG00000029270
GO:0002757	immune response-activating signal transduction	biological_process	1.98e-10	8.66e-08	26	630	136	14096	ENSGALG00000043650,ENSGALG00000002192,ENSGALG00000007416,ENSGALG00000032701,ENSGALG00000029270,ENSGALG00000035733,ENSGALG00000003857,ENSGALG00000035386,ENSGALG00000014561,ENSGALG00000015216,ENSGALG00000037943,ENSGALG00000007001,ENSGALG00000016661,ENSGALG00000013568,ENSGALG00000016400,ENSGALG00000005644,ENSGALG00000041192,ENSGALG00000006785,ENSGALG00000002113,ENSGALG00000016173,ENSGALG00000023411,…
GO:0060326	cell chemotaxis	biological_process	2.1e-10	8.96e-08	26	630	134	14096	ENSGALG00000034970,ENSGALG00000002329,ENSGALG00000022750,ENSGALG00000016564,ENSGALG00000026163,ENSGALG00000024470,ENSGALG00000034478,ENSGALG00000037437,ENSGALG00000004594,ENSGALG00000026995,ENSGALG00000035386,ENSGALG00000007511,ENSGALG00000006388,ENSGALG00000007806,ENSGALG00000043603,ENSGALG00000035733,ENSGALG00000037077,ENSGALG00000012456,ENSGALG00000011668,ENSGALG00000011733,ENSGALG00000038000,…
GO:0006952	defense response	biological_process	2.55e-10	1.06e-07	64	630	625	14096	ENSGALG00000015216,ENSGALG00000007001,ENSGALG00000016261,ENSGALG00000035325,ENSGALG00000035075,ENSGALG00000016400,Novel01087,ENSGALG00000000168,ENSGALG00000016590,ENSGALG00000013468,ENSGALG00000005547,ENSGALG00000027512,ENSGALG00000005757,ENSGALG00000016564,ENSGALG00000024470,ENSGALG00000035733,ENSGALG00000026781,ENSGALG00000000736,ENSGALG00000001882,ENSGALG00000013723,ENSGALG00000004128,ENSGALG0…
GO:0030098	lymphocyte differentiation	biological_process	2.89e-10	1.18e-07	31	630	190	14096	ENSGALG00000013086,ENSGALG00000038559,ENSGALG00000014561,ENSGALG00000035386,ENSGALG00000029270,ENSGALG00000027247,ENSGALG00000002160,ENSGALG00000003857,ENSGALG00000035733,ENSGALG00000006415,ENSGALG00000032530,ENSGALG00000002080,ENSGALG00000007416,ENSGALG00000016564,ENSGALG00000022750,ENSGALG00000037437,ENSGALG00000004594,ENSGALG00000012442,ENSGALG00000007121,ENSGALG00000001486,ENSGALG00000000466,…
GO:0007166	cell surface receptor signaling pathway	biological_process	4e-10	1.59e-07	111	630	1404	14096	ENSGALG00000008141,ENSGALG00000005644,ENSGALG00000037943,ENSGALG00000007001,ENSGALG00000015216,ENSGALG00000005725,ENSGALG00000012472,ENSGALG00000039432,ENSGALG00000016227,ENSGALG00000033087,ENSGALG00000035325,ENSGALG00000013468,ENSGALG00000000168,ENSGALG00000007416,ENSGALG00000024470,ENSGALG00000001094,ENSGALG00000016564,ENSGALG00000032260,ENSGALG00000023193,ENSGALG00000008266,ENSGALG00000036627,…
GO:0001817	regulation of cytokine production	biological_process	4.4e-10	1.71e-07	37	630	266	14096	ENSGALG00000006415,ENSGALG00000034970,ENSGALG00000022750,ENSGALG00000032530,ENSGALG00000004167,ENSGALG00000006527,ENSGALG00000004594,ENSGALG00000011203,ENSGALG00000032701,ENSGALG00000004958,ENSGALG00000003863,ENSGALG00000013568,ENSGALG00000041192,ENSGALG00000006785,ENSGALG00000016022,ENSGALG00000016173,ENSGALG00000000839,ENSGALG00000012830,ENSGALG00000007416,ENSGALG00000005757,ENSGALG00000027512,…
GO:0002764	immune response-regulating signaling pathway	biological_process	5.39e-10	2.03e-07	26	630	142	14096	ENSGALG00000041192,ENSGALG00000006785,ENSGALG00000002113,ENSGALG00000023411,ENSGALG00000016173,ENSGALG00000013568,ENSGALG00000005644,ENSGALG00000016661,ENSGALG00000016400,ENSGALG00000007001,ENSGALG00000015216,ENSGALG00000037943,ENSGALG00000016590,ENSGALG00000001486,ENSGALG00000013468,ENSGALG00000005547,ENSGALG00000012830,ENSGALG00000007416,ENSGALG00000043650,ENSGALG00000002192,ENSGALG00000014561,…
GO:0045087	innate immune response	biological_process	5.44e-10	2.03e-07	33	630	218	14096	ENSGALG00000002160,ENSGALG00000043603,ENSGALG00000000736,ENSGALG00000014561,ENSGALG00000043650,ENSGALG00000024470,ENSGALG00000016564,ENSGALG00000002329,ENSGALG00000016590,ENSGALG00000013468,ENSGALG00000005547,ENSGALG00000007001,ENSGALG00000015216,ENSGALG00000016261,ENSGALG00000011551,ENSGALG00000016400,ENSGALG00000006756,ENSGALG00000003857,ENSGALG00000032701,ENSGALG00000004974,ENSGALG00000003144,…
GO:0044700	single organism signaling	biological_process	6.21e-10	2.27e-07	216	630	3399	14096	ENSGALG00000016564,ENSGALG00000007416,ENSGALG00000008266,ENSGALG00000007993,ENSGALG00000037166,ENSGALG00000020331,ENSGALG00000009422,ENSGALG00000000736,ENSGALG00000035386,ENSGALG00000033234,ENSGALG00000014858,ENSGALG00000000681,ENSGALG00000042812,ENSGALG00000038042,ENSGALG00000003217,ENSGALG00000009864,ENSGALG00000007174,ENSGALG00000039228,ENSGALG00000035325,ENSGALG00000033278,ENSGALG00000041988,…
GO:0002250	adaptive immune response	biological_process	6.58e-10	2.34e-07	25	630	131	14096	ENSGALG00000012830,ENSGALG00000021569,ENSGALG00000001486,ENSGALG00000015216,ENSGALG00000016852,ENSGALG00000014659,ENSGALG00000011551,ENSGALG00000013372,ENSGALG00000000775,ENSGALG00000005644,ENSGALG00000016400,ENSGALG00000040926,ENSGALG00000003857,ENSGALG00000002160,ENSGALG00000004771,ENSGALG00000003863,ENSGALG00000029270,ENSGALG00000038559,ENSGALG00000014561,ENSGALG00000004594,ENSGALG00000032231,…
GO:0050870	positive regulation of T cell activation	biological_process	6.65e-10	2.34e-07	19	630	76	14096	ENSGALG00000031735,ENSGALG00000000466,ENSGALG00000001486,ENSGALG00000016852,ENSGALG00000015216,ENSGALG00000013372,ENSGALG00000035733,ENSGALG00000043603,ENSGALG00000029270,ENSGALG00000012755,ENSGALG00000035386,ENSGALG00000015032,ENSGALG00000004594,ENSGALG00000037437,ENSGALG00000032530,ENSGALG00000026163,ENSGALG00000007416,ENSGALG00000034970,ENSGALG00000006415
GO:0030217	T cell differentiation	biological_process	7.02e-10	2.42e-07	24	630	123	14096	ENSGALG00000004594,ENSGALG00000037437,ENSGALG00000022750,ENSGALG00000002080,ENSGALG00000032530,ENSGALG00000007416,ENSGALG00000035733,ENSGALG00000003857,ENSGALG00000002160,ENSGALG00000027247,ENSGALG00000029270,ENSGALG00000035386,ENSGALG00000038559,ENSGALG00000034975,ENSGALG00000015216,ENSGALG00000031862,ENSGALG00000006785,ENSGALG00000039228,ENSGALG00000013372,ENSGALG00000016400,ENSGALG00000012830,…
GO:0023052	signaling	biological_process	7.82e-10	2.64e-07	216	630	3408	14096	ENSGALG00000037166,ENSGALG00000020331,ENSGALG00000008266,ENSGALG00000007993,ENSGALG00000007416,ENSGALG00000016564,ENSGALG00000042812,ENSGALG00000000681,ENSGALG00000014858,ENSGALG00000033234,ENSGALG00000000736,ENSGALG00000035386,ENSGALG00000009422,ENSGALG00000007001,ENSGALG00000037943,ENSGALG00000027407,ENSGALG00000005725,ENSGALG00000016227,ENSGALG00000033087,ENSGALG00000035325,ENSGALG00000041988,…
GO:0010033	response to organic substance	biological_process	8.45e-10	2.81e-07	105	630	1314	14096	ENSGALG00000029270,ENSGALG00000043603,ENSGALG00000033520,ENSGALG00000002160,ENSGALG00000010335,ENSGALG00000010707,ENSGALG00000015032,ENSGALG00000029381,ENSGALG00000021567,ENSGALG00000037437,ENSGALG00000043650,ENSGALG00000007367,ENSGALG00000002329,ENSGALG00000017195,ENSGALG00000009626,ENSGALG00000016293,ENSGALG00000025887,ENSGALG00000019761,ENSGALG00000004960,ENSGALG00000016196,ENSGALG00000015183,…
GO:0001819	positive regulation of cytokine production	biological_process	9.09e-10	2.96e-07	29	630	176	14096	ENSGALG00000000839,ENSGALG00000015216,ENSGALG00000007001,ENSGALG00000005725,ENSGALG00000013568,ENSGALG00000016400,ENSGALG00000016022,ENSGALG00000041192,ENSGALG00000006785,ENSGALG00000012830,ENSGALG00000009626,ENSGALG00000013468,ENSGALG00000023517,ENSGALG00000016590,ENSGALG00000005757,ENSGALG00000006527,ENSGALG00000004594,ENSGALG00000006415,ENSGALG00000034970,ENSGALG00000007416,ENSGALG00000032530,…
GO:0042221	response to chemical	biological_process	9.63e-10	3.04e-07	132	630	1797	14096	ENSGALG00000008281,ENSGALG00000009724,ENSGALG00000012755,ENSGALG00000022750,ENSGALG00000004418,ENSGALG00000032717,Novel01265,ENSGALG00000000839,ENSGALG00000009302,ENSGALG00000006785,ENSGALG00000040553,ENSGALG00000026525,ENSGALG00000005619,ENSGALG00000002160,ENSGALG00000033520,ENSGALG00000029270,ENSGALG00000007511,ENSGALG00000015032,ENSGALG00000029381,ENSGALG00000043650,ENSGALG00000002329,ENSGALG0…
GO:0046631	alpha-beta T cell activation	biological_process	9.67e-10	3.04e-07	17	630	62	14096	ENSGALG00000012830,ENSGALG00000001486,ENSGALG00000007121,ENSGALG00000034975,ENSGALG00000031862,ENSGALG00000015216,ENSGALG00000016400,ENSGALG00000006785,ENSGALG00000027247,ENSGALG00000029270,ENSGALG00000003857,ENSGALG00000035386,ENSGALG00000034970,ENSGALG00000022750,ENSGALG00000002080,ENSGALG00000007416,ENSGALG00000032530
GO:0002443	leukocyte mediated immunity	biological_process	1.19e-09	3.68e-07	24	630	126	14096	ENSGALG00000001486,ENSGALG00000013468,ENSGALG00000021569,ENSGALG00000007001,ENSGALG00000015216,ENSGALG00000014659,ENSGALG00000013372,ENSGALG00000013568,ENSGALG00000005644,ENSGALG00000016400,ENSGALG00000012456,ENSGALG00000002160,ENSGALG00000004771,ENSGALG00000003863,ENSGALG00000029270,ENSGALG00000038559,ENSGALG00000014561,ENSGALG00000004594,ENSGALG00000008447,ENSGALG00000032231,ENSGALG00000006527,…
GO:0048002	antigen processing and presentation of peptide antigen	biological_process	1.22e-09	3.71e-07	11	630	23	14096	ENSGALG00000000775,ENSGALG00000035075,ENSGALG00000009520,ENSGALG00000000158,ENSGALG00000032602,ENSGALG00000041380,ENSGALG00000033932,ENSGALG00000029381,ENSGALG00000004594,ENSGALG00000033694,ENSGALG00000002160
GO:0030595	leukocyte chemotaxis	biological_process	1.31e-09	3.9e-07	21	630	96	14096	ENSGALG00000024470,ENSGALG00000026163,ENSGALG00000034478,ENSGALG00000022750,ENSGALG00000016564,ENSGALG00000002329,ENSGALG00000004594,ENSGALG00000006388,ENSGALG00000007511,ENSGALG00000035386,ENSGALG00000037077,ENSGALG00000035733,ENSGALG00000043603,ENSGALG00000012456,ENSGALG00000015216,ENSGALG00000038000,ENSGALG00000011733,ENSGALG00000011668,ENSGALG00000032717,ENSGALG00000006346,ENSGALG00000014585
GO:0050900	leukocyte migration	biological_process	2.28e-09	6.58e-07	25	630	138	14096	ENSGALG00000032717,ENSGALG00000006346,ENSGALG00000014585,ENSGALG00000000168,ENSGALG00000005644,ENSGALG00000012456,ENSGALG00000034975,ENSGALG00000015216,ENSGALG00000011668,ENSGALG00000011733,ENSGALG00000038000,ENSGALG00000007511,ENSGALG00000035386,ENSGALG00000006388,ENSGALG00000035733,ENSGALG00000037077,ENSGALG00000043603,ENSGALG00000029270,ENSGALG00000022750,ENSGALG00000016564,ENSGALG00000026163,…
GO:1903037	regulation of leukocyte cell-cell adhesion	biological_process	2.5e-09	7.12e-07	24	630	129	14096	ENSGALG00000031735,ENSGALG00000001486,ENSGALG00000000466,ENSGALG00000016852,ENSGALG00000015216,ENSGALG00000013372,ENSGALG00000012456,ENSGALG00000013568,ENSGALG00000006785,ENSGALG00000043603,ENSGALG00000029270,ENSGALG00000035733,ENSGALG00000012755,ENSGALG00000015032,ENSGALG00000035386,ENSGALG00000014561,ENSGALG00000023689,ENSGALG00000037437,ENSGALG00000004594,ENSGALG00000034970,ENSGALG00000006415,…
GO:0070887	cellular response to chemical stimulus	biological_process	2.62e-09	7.34e-07	102	630	1290	14096	ENSGALG00000019761,ENSGALG00000025887,ENSGALG00000009626,ENSGALG00000016293,ENSGALG00000006346,ENSGALG00000012613,Novel03081,ENSGALG00000015183,ENSGALG00000038069,ENSGALG00000012456,ENSGALG00000016788,ENSGALG00000004960,ENSGALG00000007511,ENSGALG00000010707,ENSGALG00000002160,ENSGALG00000033520,ENSGALG00000021238,ENSGALG00000010335,ENSGALG00000043603,ENSGALG00000029270,ENSGALG00000007367,ENSGALG0…
GO:0007186	G-protein coupled receptor signaling pathway	biological_process	3.16e-09	8.71e-07	56	630	538	14096	ENSGALG00000027407,ENSGALG00000016227,ENSGALG00000039432,Novel03081,ENSGALG00000004058,ENSGALG00000012456,ENSGALG00000038042,ENSGALG00000008427,ENSGALG00000038069,ENSGALG00000000168,ENSGALG00000010595,ENSGALG00000001462,ENSGALG00000037166,ENSGALG00000020331,ENSGALG00000036627,ENSGALG00000001094,ENSGALG00000024470,ENSGALG00000002329,ENSGALG00000035733,ENSGALG00000001698,Novel03025,ENSGALG000000148…
GO:0071310	cellular response to organic substance	biological_process	3.5e-09	9.51e-07	88	630	1059	14096	ENSGALG00000024470,ENSGALG00000016564,ENSGALG00000040418,ENSGALG00000039682,ENSGALG00000032260,ENSGALG00000023193,ENSGALG00000008266,ENSGALG00000005757,ENSGALG00000036627,ENSGALG00000033234,ENSGALG00000017327,ENSGALG00000001882,ENSGALG00000005638,ENSGALG00000035733,ENSGALG00000039080,ENSGALG00000039228,ENSGALG00000003217,ENSGALG00000038042,ENSGALG00000007001,ENSGALG00000037943,ENSGALG00000015216,…
GO:0016337	single organismal cell-cell adhesion	biological_process	3.58e-09	9.56e-07	44	630	380	14096	ENSGALG00000007511,ENSGALG00000015032,ENSGALG00000035386,ENSGALG00000014561,ENSGALG00000005257,ENSGALG00000038559,ENSGALG00000003818,ENSGALG00000035733,ENSGALG00000002160,ENSGALG00000029270,ENSGALG00000043603,ENSGALG00000007416,ENSGALG00000007579,ENSGALG00000023689,ENSGALG00000037437,ENSGALG00000000466,ENSGALG00000007121,ENSGALG00000031735,ENSGALG00000007412,ENSGALG00000039228,ENSGALG00000016986,…
GO:0030097	hemopoiesis	biological_process	5.02e-09	1.3e-06	49	630	454	14096	ENSGALG00000013481,ENSGALG00000007121,ENSGALG00000000466,ENSGALG00000015216,ENSGALG00000008127,ENSGALG00000034975,ENSGALG00000022733,ENSGALG00000005725,ENSGALG00000010770,ENSGALG00000016400,ENSGALG00000039228,ENSGALG00000012541,ENSGALG00000029270,ENSGALG00000011646,ENSGALG00000002160,ENSGALG00000033520,ENSGALG00000035733,ENSGALG00000010707,ENSGALG00000038559,ENSGALG00000014561,ENSGALG00000035386,…
GO:0022409	positive regulation of cell-cell adhesion	biological_process	6.96e-09	1.78e-06	20	630	96	14096	ENSGALG00000013372,ENSGALG00000013568,ENSGALG00000016852,ENSGALG00000015216,ENSGALG00000000466,ENSGALG00000001486,ENSGALG00000031735,ENSGALG00000032530,ENSGALG00000026163,ENSGALG00000007416,ENSGALG00000006415,ENSGALG00000034970,ENSGALG00000004594,ENSGALG00000037437,ENSGALG00000015032,ENSGALG00000012755,ENSGALG00000035386,ENSGALG00000035733,ENSGALG00000043603,ENSGALG00000029270
GO:0002504	antigen processing and presentation of peptide or polysaccharide antigen via MHC class II	biological_process	8.13e-09	2.05e-06	8	630	12	14096	ENSGALG00000009626,ENSGALG00000000162,ENSGALG00000038393,ENSGALG00000000141,ENSGALG00000033694,ENSGALG00000000158,ENSGALG00000004594,ENSGALG00000009520
GO:0070098	chemokine-mediated signaling pathway	biological_process	9.74e-09	2.39e-06	12	630	32	14096	ENSGALG00000032717,ENSGALG00000014585,ENSGALG00000043603,ENSGALG00000037077,ENSGALG00000038069,ENSGALG00000002329,ENSGALG00000016564,ENSGALG00000024470,ENSGALG00000011668,ENSGALG00000036627,ENSGALG00000011733,ENSGALG00000038000
GO:0006954	inflammatory response	biological_process	1.46e-08	3.54e-06	34	630	256	14096	ENSGALG00000029270,ENSGALG00000043603,ENSGALG00000035733,ENSGALG00000001882,ENSGALG00000026781,ENSGALG00000009388,ENSGALG00000027512,ENSGALG00000002329,ENSGALG00000024470,ENSGALG00000000168,ENSGALG00000009626,ENSGALG00000013468,ENSGALG00000005547,ENSGALG00000016590,ENSGALG00000016261,ENSGALG00000015216,ENSGALG00000007001,ENSGALG00000006756,ENSGALG00000037077,ENSGALG00000003863,ENSGALG00000000783,…
GO:0048534	hematopoietic or lymphoid organ development	biological_process	2.07e-08	4.95e-06	50	630	489	14096	ENSGALG00000035733,ENSGALG00000002160,ENSGALG00000033520,ENSGALG00000011646,ENSGALG00000029270,ENSGALG00000014561,ENSGALG00000035386,ENSGALG00000038559,ENSGALG00000010707,ENSGALG00000012442,ENSGALG00000026137,ENSGALG00000037437,ENSGALG00000034950,ENSGALG00000005757,ENSGALG00000016564,ENSGALG00000039682,ENSGALG00000007416,ENSGALG00000013481,ENSGALG00000000466,ENSGALG00000007121,ENSGALG00000022733,…
GO:0007155	cell adhesion	biological_process	2.16e-08	5.08e-06	65	630	731	14096	ENSGALG00000031735,ENSGALG00000033278,ENSGALG00000015216,ENSGALG00000034975,ENSGALG00000005644,ENSGALG00000016400,ENSGALG00000039228,ENSGALG00000039080,ENSGALG00000035733,ENSGALG00000035386,ENSGALG00000005319,ENSGALG00000023689,ENSGALG00000007579,ENSGALG00000007416,ENSGALG00000016564,ENSGALG00000012830,ENSGALG00000001486,ENSGALG00000012941,ENSGALG00000031862,ENSGALG00000013372,ENSGALG00000003863,…
GO:0022610	biological adhesion	biological_process	2.61e-08	6.07e-06	65	630	735	14096	ENSGALG00000031735,ENSGALG00000033278,ENSGALG00000015216,ENSGALG00000034975,ENSGALG00000005644,ENSGALG00000016400,ENSGALG00000039228,ENSGALG00000039080,ENSGALG00000035733,ENSGALG00000035386,ENSGALG00000005319,ENSGALG00000023689,ENSGALG00000007579,ENSGALG00000007416,ENSGALG00000016564,ENSGALG00000012830,ENSGALG00000001486,ENSGALG00000012941,ENSGALG00000031862,ENSGALG00000013372,ENSGALG00000003863,…
GO:0002696	positive regulation of leukocyte activation	biological_process	2.67e-08	6.13e-06	22	630	124	14096	ENSGALG00000009626,ENSGALG00000031735,ENSGALG00000001486,ENSGALG00000000466,ENSGALG00000016852,ENSGALG00000015216,ENSGALG00000007001,ENSGALG00000013372,ENSGALG00000013568,ENSGALG00000029270,ENSGALG00000043603,ENSGALG00000035733,ENSGALG00000012755,ENSGALG00000035386,ENSGALG00000015032,ENSGALG00000037437,ENSGALG00000004594,ENSGALG00000034970,ENSGALG00000006415,ENSGALG00000026163,ENSGALG00000007416,…
GO:0098602	single organism cell adhesion	biological_process	2.72e-08	6.17e-06	45	630	422	14096	ENSGALG00000033278,ENSGALG00000034975,ENSGALG00000015216,ENSGALG00000016986,ENSGALG00000012456,ENSGALG00000016400,ENSGALG00000039228,ENSGALG00000007412,ENSGALG00000031735,ENSGALG00000007121,ENSGALG00000000466,ENSGALG00000023689,ENSGALG00000037437,ENSGALG00000007579,ENSGALG00000007416,ENSGALG00000029270,ENSGALG00000043603,ENSGALG00000035733,ENSGALG00000002160,ENSGALG00000003818,ENSGALG00000015032,…
GO:0050863	regulation of T cell activation	biological_process	2.84e-08	6.36e-06	22	630	124	14096	ENSGALG00000026163,ENSGALG00000007416,ENSGALG00000032530,ENSGALG00000034970,ENSGALG00000006415,ENSGALG00000004594,ENSGALG00000037437,ENSGALG00000012755,ENSGALG00000014561,ENSGALG00000015032,ENSGALG00000035386,ENSGALG00000035733,ENSGALG00000043603,ENSGALG00000029270,ENSGALG00000006785,ENSGALG00000013372,ENSGALG00000012456,ENSGALG00000016852,ENSGALG00000015216,ENSGALG00000000466,ENSGALG00000001486,…
GO:0098609	cell-cell adhesion	biological_process	2.94e-08	6.51e-06	47	630	455	14096	ENSGALG00000012755,ENSGALG00000027247,ENSGALG00000003863,ENSGALG00000003857,ENSGALG00000034970,ENSGALG00000006415,ENSGALG00000022750,ENSGALG00000026163,ENSGALG00000002080,ENSGALG00000032530,ENSGALG00000006527,ENSGALG00000004594,ENSGALG00000001486,ENSGALG00000012941,ENSGALG00000012830,ENSGALG00000013568,ENSGALG00000013372,ENSGALG00000006785,ENSGALG00000016852,ENSGALG00000031862,ENSGALG00000003818,…
GO:0034110	regulation of homotypic cell-cell adhesion	biological_process	4.52e-08	9.75e-06	23	630	138	14096	ENSGALG00000000466,ENSGALG00000001486,ENSGALG00000031735,ENSGALG00000006785,ENSGALG00000013372,ENSGALG00000012456,ENSGALG00000013568,ENSGALG00000015216,ENSGALG00000016852,ENSGALG00000012755,ENSGALG00000035386,ENSGALG00000015032,ENSGALG00000014561,ENSGALG00000035733,ENSGALG00000043603,ENSGALG00000029270,ENSGALG00000032530,ENSGALG00000026163,ENSGALG00000007416,ENSGALG00000006415,ENSGALG00000034970,…
GO:0046632	alpha-beta T cell differentiation	biological_process	4.74e-08	1.01e-05	14	630	53	14096	ENSGALG00000007121,ENSGALG00000001486,ENSGALG00000035386,ENSGALG00000027247,ENSGALG00000012830,ENSGALG00000029270,ENSGALG00000003857,ENSGALG00000016400,ENSGALG00000006785,ENSGALG00000022750,ENSGALG00000032530,ENSGALG00000034975,ENSGALG00000015216,ENSGALG00000031862
GO:0050867	positive regulation of cell activation	biological_process	4.82e-08	1.01e-05	22	630	128	14096	ENSGALG00000015032,ENSGALG00000012755,ENSGALG00000035386,ENSGALG00000035733,ENSGALG00000043603,ENSGALG00000029270,ENSGALG00000026163,ENSGALG00000032530,ENSGALG00000007416,ENSGALG00000034970,ENSGALG00000006415,ENSGALG00000004594,ENSGALG00000037437,ENSGALG00000000466,ENSGALG00000001486,ENSGALG00000031735,ENSGALG00000009626,ENSGALG00000013568,ENSGALG00000013372,ENSGALG00000007001,ENSGALG00000016852,…
GO:0007154	cell communication	biological_process	4.86e-08	1.01e-05	216	630	3577	14096	ENSGALG00000012850,ENSGALG00000012830,ENSGALG00000004969,ENSGALG00000007007,ENSGALG00000005543,ENSGALG00000001486,ENSGALG00000011733,ENSGALG00000007252,ENSGALG00000004128,ENSGALG00000018998,ENSGALG00000004071,Novel01117,ENSGALG00000021552,ENSGALG00000007806,ENSGALG00000003863,ENSGALG00000000783,ENSGALG00000033351,ENSGALG00000002192,ENSGALG00000003580,ENSGALG00000004594,ENSGALG00000013869,ENSGALG0…
GO:0002460	adaptive immune response based on somatic recombination of immune receptors built from immunoglobulin superfamily domains	biological_process	1.1e-07	2.26e-05	19	630	103	14096	ENSGALG00000021569,ENSGALG00000012830,ENSGALG00000013372,ENSGALG00000005644,ENSGALG00000016400,ENSGALG00000014659,ENSGALG00000016852,ENSGALG00000014561,ENSGALG00000038559,ENSGALG00000029270,ENSGALG00000003863,ENSGALG00000002160,ENSGALG00000004771,ENSGALG00000006415,ENSGALG00000034970,ENSGALG00000032530,ENSGALG00000029381,ENSGALG00000032231,ENSGALG00000004594
GO:0002520	immune system development	biological_process	1.16e-07	2.36e-05	50	630	518	14096	ENSGALG00000007416,ENSGALG00000016564,ENSGALG00000039682,ENSGALG00000026137,ENSGALG00000012442,ENSGALG00000005757,ENSGALG00000034950,ENSGALG00000037437,ENSGALG00000038559,ENSGALG00000014561,ENSGALG00000035386,ENSGALG00000010707,ENSGALG00000033520,ENSGALG00000002160,ENSGALG00000035733,ENSGALG00000029270,ENSGALG00000011646,ENSGALG00000039228,ENSGALG00000012541,ENSGALG00000010770,ENSGALG00000016400,…
GO:0031349	positive regulation of defense response	biological_process	1.19e-07	2.4e-05	21	630	124	14096	ENSGALG00000007001,ENSGALG00000016400,ENSGALG00000041192,ENSGALG00000006785,ENSGALG00000023411,ENSGALG00000014585,ENSGALG00000012830,ENSGALG00000013468,ENSGALG00000005547,ENSGALG00000032717,ENSGALG00000016590,ENSGALG00000043650,ENSGALG00000006527,ENSGALG00000008447,ENSGALG00000003580,ENSGALG00000002329,ENSGALG00000001256,ENSGALG00000024470,ENSGALG00000026163,ENSGALG00000032701,ENSGALG00000035733
GO:0097529	myeloid leukocyte migration	biological_process	1.3e-07	2.58e-05	17	630	83	14096	ENSGALG00000024470,ENSGALG00000026163,ENSGALG00000016564,ENSGALG00000002329,ENSGALG00000004594,ENSGALG00000007511,ENSGALG00000035386,ENSGALG00000037077,ENSGALG00000035733,ENSGALG00000043603,ENSGALG00000012456,ENSGALG00000015216,ENSGALG00000038000,ENSGALG00000011733,ENSGALG00000011668,ENSGALG00000032717,ENSGALG00000014585
GO:0002449	lymphocyte mediated immunity	biological_process	1.4e-07	2.77e-05	18	630	94	14096	ENSGALG00000016400,ENSGALG00000013372,ENSGALG00000005644,ENSGALG00000014659,ENSGALG00000021569,ENSGALG00000006415,ENSGALG00000032530,ENSGALG00000032231,ENSGALG00000006527,ENSGALG00000029381,ENSGALG00000004594,ENSGALG00000008447,ENSGALG00000038559,ENSGALG00000014561,ENSGALG00000029270,ENSGALG00000004771,ENSGALG00000002160,ENSGALG00000003863
GO:0051251	positive regulation of lymphocyte activation	biological_process	1.62e-07	3.16e-05	20	630	115	14096	ENSGALG00000031735,ENSGALG00000000466,ENSGALG00000001486,ENSGALG00000007001,ENSGALG00000016852,ENSGALG00000015216,ENSGALG00000013372,ENSGALG00000035733,ENSGALG00000043603,ENSGALG00000029270,ENSGALG00000015032,ENSGALG00000012755,ENSGALG00000035386,ENSGALG00000004594,ENSGALG00000037437,ENSGALG00000032530,ENSGALG00000026163,ENSGALG00000007416,ENSGALG00000006415,ENSGALG00000034970
GO:0009605	response to external stimulus	biological_process	2.2e-07	4.23e-05	90	630	1200	14096	ENSGALG00000001882,ENSGALG00000013723,ENSGALG00000039170,ENSGALG00000035386,ENSGALG00000006388,ENSGALG00000035733,ENSGALG00000042812,ENSGALG00000031301,ENSGALG00000010490,ENSGALG00000016564,ENSGALG00000024470,ENSGALG00000036627,ENSGALG00000005757,ENSGALG00000027512,ENSGALG00000005547,ENSGALG00000013468,ENSGALG00000016590,ENSGALG00000000168,ENSGALG00000016400,ENSGALG00000003217,ENSGALG00000041988,…
GO:0051716	cellular response to stimulus	biological_process	2.25e-07	4.29e-05	231	630	3961	14096	ENSGALG00000000168,ENSGALG00000016590,ENSGALG00000001690,ENSGALG00000000544,ENSGALG00000007001,ENSGALG00000037943,ENSGALG00000027407,ENSGALG00000005725,ENSGALG00000016227,ENSGALG00000033087,ENSGALG00000035325,ENSGALG00000033278,ENSGALG00000041988,ENSGALG00000039228,ENSGALG00000009864,ENSGALG00000007174,ENSGALG00000003217,ENSGALG00000038042,ENSGALG00000042812,ENSGALG00000012075,ENSGALG00000000681,…
GO:0070661	leukocyte proliferation	biological_process	2.51e-07	4.73e-05	23	630	150	14096	ENSGALG00000013372,ENSGALG00000012456,ENSGALG00000023411,ENSGALG00000006785,ENSGALG00000016852,ENSGALG00000015216,ENSGALG00000007001,ENSGALG00000001486,ENSGALG00000013481,ENSGALG00000006415,ENSGALG00000034970,ENSGALG00000002080,ENSGALG00000026163,ENSGALG00000007416,ENSGALG00000032530,ENSGALG00000004594,ENSGALG00000012755,ENSGALG00000014561,ENSGALG00000035386,ENSGALG00000015032,ENSGALG00000043603,…
GO:0002703	regulation of leukocyte mediated immunity	biological_process	3.23e-07	5.97e-05	15	630	70	14096	ENSGALG00000015216,ENSGALG00000007001,ENSGALG00000008447,ENSGALG00000006527,ENSGALG00000029381,ENSGALG00000032530,ENSGALG00000013372,ENSGALG00000016400,ENSGALG00000012456,ENSGALG00000002160,ENSGALG00000003863,ENSGALG00000029270,ENSGALG00000014561,ENSGALG00000013468,ENSGALG00000001486
GO:0002429	immune response-activating cell surface receptor signaling pathway	biological_process	3.82e-07	6.84e-05	15	630	71	14096	ENSGALG00000001486,ENSGALG00000035386,ENSGALG00000014561,ENSGALG00000029270,ENSGALG00000003857,ENSGALG00000035733,ENSGALG00000005644,ENSGALG00000013568,ENSGALG00000016661,ENSGALG00000016173,ENSGALG00000007416,ENSGALG00000002113,ENSGALG00000002192,ENSGALG00000015216,ENSGALG00000037943
GO:1902533	positive regulation of intracellular signal transduction	biological_process	4.18e-07	7.41e-05	48	630	501	14096	ENSGALG00000003217,ENSGALG00000009864,ENSGALG00000007174,ENSGALG00000035325,ENSGALG00000015216,ENSGALG00000037943,ENSGALG00000007001,ENSGALG00000005725,ENSGALG00000005547,ENSGALG00000013468,ENSGALG00000016590,ENSGALG00000000466,ENSGALG00000009626,ENSGALG00000002329,ENSGALG00000003103,ENSGALG00000024470,ENSGALG00000007416,ENSGALG00000039682,ENSGALG00000016564,ENSGALG00000021567,ENSGALG00000014561,…
GO:0018108	peptidyl-tyrosine phosphorylation	biological_process	4.32e-07	7.59e-05	26	630	195	14096	ENSGALG00000016661,ENSGALG00000040926,ENSGALG00000015216,ENSGALG00000005725,ENSGALG00000033510,ENSGALG00000015422,ENSGALG00000000466,ENSGALG00000001486,ENSGALG00000007416,ENSGALG00000003103,ENSGALG00000039682,ENSGALG00000016564,ENSGALG00000012594,ENSGALG00000004594,ENSGALG00000004398,ENSGALG00000021567,ENSGALG00000005257,ENSGALG00000012755,ENSGALG00000000736,ENSGALG00000007511,ENSGALG00000014561,…
GO:0002694	regulation of leukocyte activation	biological_process	5.1e-07	8.88e-05	27	630	207	14096	ENSGALG00000035733,ENSGALG00000043603,ENSGALG00000029270,ENSGALG00000012755,ENSGALG00000035386,ENSGALG00000015032,ENSGALG00000014561,ENSGALG00000004594,ENSGALG00000037437,ENSGALG00000032530,ENSGALG00000026163,ENSGALG00000007416,ENSGALG00000006415,ENSGALG00000034970,ENSGALG00000013481,ENSGALG00000009626,ENSGALG00000031735,ENSGALG00000000466,ENSGALG00000001486,ENSGALG00000007001,ENSGALG00000016852,…
GO:0018212	peptidyl-tyrosine modification	biological_process	5.31e-07	9.16e-05	26	630	197	14096	ENSGALG00000003857,ENSGALG00000008281,ENSGALG00000009724,ENSGALG00000004958,ENSGALG00000043603,ENSGALG00000012755,ENSGALG00000014561,ENSGALG00000000736,ENSGALG00000007511,ENSGALG00000005257,ENSGALG00000004594,ENSGALG00000021567,ENSGALG00000004398,ENSGALG00000039682,ENSGALG00000016564,ENSGALG00000007416,ENSGALG00000003103,ENSGALG00000012594,ENSGALG00000015422,ENSGALG00000000466,ENSGALG00000001486,…
GO:0030593	neutrophil chemotaxis	biological_process	5.74e-07	9.74e-05	11	630	38	14096	ENSGALG00000004594,ENSGALG00000015216,ENSGALG00000011668,ENSGALG00000024470,ENSGALG00000012456,ENSGALG00000002329,ENSGALG00000035733,ENSGALG00000014585,ENSGALG00000035386,ENSGALG00000007511,ENSGALG00000032717
GO:0051249	regulation of lymphocyte activation	biological_process	5.76e-07	9.74e-05	25	630	183	14096	ENSGALG00000007001,ENSGALG00000016852,ENSGALG00000015216,ENSGALG00000006785,ENSGALG00000040926,ENSGALG00000013372,ENSGALG00000012456,ENSGALG00000013481,ENSGALG00000031735,ENSGALG00000000466,ENSGALG00000001486,ENSGALG00000004594,ENSGALG00000037437,ENSGALG00000007416,ENSGALG00000026163,ENSGALG00000032530,ENSGALG00000034970,ENSGALG00000006415,ENSGALG00000035733,ENSGALG00000043603,ENSGALG00000029270,…
GO:0071621	granulocyte chemotaxis	biological_process	6.34e-07	0.0001052	12	630	46	14096	ENSGALG00000011668,ENSGALG00000015216,ENSGALG00000004594,ENSGALG00000012456,ENSGALG00000002329,ENSGALG00000024470,ENSGALG00000014585,ENSGALG00000043603,ENSGALG00000035733,ENSGALG00000032717,ENSGALG00000007511,ENSGALG00000035386
GO:0045058	T cell selection	biological_process	6.59e-07	0.00010802	9	630	25	14096	ENSGALG00000001486,ENSGALG00000035733,ENSGALG00000012830,ENSGALG00000029270,ENSGALG00000007416,ENSGALG00000002080,ENSGALG00000015216,ENSGALG00000004594,ENSGALG00000031862
GO:0070663	regulation of leukocyte proliferation	biological_process	6.63e-07	0.00010802	18	630	103	14096	ENSGALG00000034970,ENSGALG00000006415,ENSGALG00000032530,ENSGALG00000007416,ENSGALG00000004594,ENSGALG00000035386,ENSGALG00000012755,ENSGALG00000015032,ENSGALG00000014561,ENSGALG00000009724,ENSGALG00000043603,ENSGALG00000012456,ENSGALG00000006785,ENSGALG00000016852,ENSGALG00000015216,ENSGALG00000007001,ENSGALG00000001486,ENSGALG00000013481
GO:0002768	immune response-regulating cell surface receptor signaling pathway	biological_process	8.01e-07	0.00012938	15	630	75	14096	ENSGALG00000035386,ENSGALG00000014561,ENSGALG00000001486,ENSGALG00000003857,ENSGALG00000035733,ENSGALG00000029270,ENSGALG00000007416,ENSGALG00000016173,ENSGALG00000002113,ENSGALG00000016661,ENSGALG00000013568,ENSGALG00000005644,ENSGALG00000037943,ENSGALG00000015216,ENSGALG00000002192
GO:0042098	T cell proliferation	biological_process	9.41e-07	0.00015049	16	630	85	14096	ENSGALG00000001486,ENSGALG00000012456,ENSGALG00000006785,ENSGALG00000016852,ENSGALG00000015216,ENSGALG00000014561,ENSGALG00000012755,ENSGALG00000035386,ENSGALG00000015032,ENSGALG00000043603,ENSGALG00000003863,ENSGALG00000034970,ENSGALG00000006415,ENSGALG00000032530,ENSGALG00000007416,ENSGALG00000002080
GO:0048520	positive regulation of behavior	biological_process	1.24e-06	0.00019624	14	630	67	14096	ENSGALG00000016564,ENSGALG00000013568,ENSGALG00000012456,ENSGALG00000004594,ENSGALG00000011733,ENSGALG00000011668,ENSGALG00000006388,ENSGALG00000035386,ENSGALG00000037077,ENSGALG00000009626,ENSGALG00000035733,ENSGALG00000006346,ENSGALG00000007806,ENSGALG00000043603
GO:0042129	regulation of T cell proliferation	biological_process	1.28e-06	0.00020141	14	630	67	14096	ENSGALG00000016852,ENSGALG00000015216,ENSGALG00000012456,ENSGALG00000034970,ENSGALG00000006415,ENSGALG00000007416,ENSGALG00000032530,ENSGALG00000006785,ENSGALG00000043603,ENSGALG00000001486,ENSGALG00000012755,ENSGALG00000015032,ENSGALG00000035386,ENSGALG00000014561
GO:1902107	positive regulation of leukocyte differentiation	biological_process	1.38e-06	0.00021269	14	630	68	14096	ENSGALG00000013372,ENSGALG00000039682,ENSGALG00000032530,ENSGALG00000026163,ENSGALG00000039228,ENSGALG00000016022,ENSGALG00000037437,ENSGALG00000004594,ENSGALG00000015216,ENSGALG00000010707,ENSGALG00000001486,ENSGALG00000035386,ENSGALG00000029270,ENSGALG00000033520
GO:0002274	myeloid leukocyte activation	biological_process	1.58e-06	0.00024182	14	630	69	14096	ENSGALG00000008127,ENSGALG00000015216,ENSGALG00000007001,ENSGALG00000038000,ENSGALG00000002113,ENSGALG00000002080,ENSGALG00000013568,ENSGALG00000012456,ENSGALG00000033520,ENSGALG00000009626,ENSGALG00000035516,ENSGALG00000012830,ENSGALG00000043603,ENSGALG00000001486
GO:0002474	antigen processing and presentation of peptide antigen via MHC class I	biological_process	1.7e-06	0.00025325	7	630	15	14096	ENSGALG00000032602,ENSGALG00000041380,ENSGALG00000033932,ENSGALG00000029381,ENSGALG00000002160,ENSGALG00000033694,ENSGALG00000035075
GO:1990266	neutrophil migration	biological_process	1.71e-06	0.00025325	11	630	42	14096	ENSGALG00000014585,ENSGALG00000035733,ENSGALG00000032717,ENSGALG00000007511,ENSGALG00000035386,ENSGALG00000011668,ENSGALG00000004594,ENSGALG00000015216,ENSGALG00000002329,ENSGALG00000012456,ENSGALG00000024470
GO:0032943	mononuclear cell proliferation	biological_process	1.71e-06	0.00025325	21	630	143	14096	ENSGALG00000001486,ENSGALG00000013481,ENSGALG00000012456,ENSGALG00000013372,ENSGALG00000023411,ENSGALG00000006785,ENSGALG00000016852,ENSGALG00000015216,ENSGALG00000007001,ENSGALG00000012755,ENSGALG00000035386,ENSGALG00000014561,ENSGALG00000015032,ENSGALG00000043603,ENSGALG00000003863,ENSGALG00000034970,ENSGALG00000006415,ENSGALG00000032530,ENSGALG00000002080,ENSGALG00000007416,ENSGALG00000004594
GO:0046651	lymphocyte proliferation	biological_process	1.71e-06	0.00025325	21	630	143	14096	ENSGALG00000007416,ENSGALG00000032530,ENSGALG00000002080,ENSGALG00000034970,ENSGALG00000006415,ENSGALG00000004594,ENSGALG00000014561,ENSGALG00000012755,ENSGALG00000035386,ENSGALG00000015032,ENSGALG00000003863,ENSGALG00000043603,ENSGALG00000023411,ENSGALG00000006785,ENSGALG00000013372,ENSGALG00000012456,ENSGALG00000016852,ENSGALG00000015216,ENSGALG00000007001,ENSGALG00000001486,ENSGALG00000013481
GO:0042108	positive regulation of cytokine biosynthetic process	biological_process	1.81e-06	0.00026545	9	630	28	14096	ENSGALG00000013468,ENSGALG00000016590,ENSGALG00000012830,ENSGALG00000009626,ENSGALG00000034970,ENSGALG00000006785,ENSGALG00000007416,ENSGALG00000015216,ENSGALG00000007001
GO:0032103	positive regulation of response to external stimulus	biological_process	1.84e-06	0.00026799	21	630	145	14096	ENSGALG00000013468,ENSGALG00000032717,ENSGALG00000014585,ENSGALG00000009626,ENSGALG00000006346,ENSGALG00000012456,ENSGALG00000023411,ENSGALG00000011733,ENSGALG00000011668,ENSGALG00000006388,ENSGALG00000035386,ENSGALG00000007806,ENSGALG00000043603,ENSGALG00000032701,ENSGALG00000037077,ENSGALG00000035733,ENSGALG00000002329,ENSGALG00000026163,ENSGALG00000024470,ENSGALG00000016564,ENSGALG00000004594
GO:0050921	positive regulation of chemotaxis	biological_process	1.88e-06	0.00027228	13	630	60	14096	ENSGALG00000004594,ENSGALG00000011733,ENSGALG00000011668,ENSGALG00000016564,ENSGALG00000012456,ENSGALG00000035733,ENSGALG00000006346,ENSGALG00000037077,ENSGALG00000009626,ENSGALG00000007806,ENSGALG00000043603,ENSGALG00000035386,ENSGALG00000006388
GO:0022407	regulation of cell-cell adhesion	biological_process	1.9e-06	0.00027232	24	630	182	14096	ENSGALG00000006415,ENSGALG00000034970,ENSGALG00000007416,ENSGALG00000026163,ENSGALG00000032530,ENSGALG00000037437,ENSGALG00000023689,ENSGALG00000004594,ENSGALG00000012755,ENSGALG00000015032,ENSGALG00000035386,ENSGALG00000014561,ENSGALG00000043603,ENSGALG00000029270,ENSGALG00000035733,ENSGALG00000013372,ENSGALG00000012456,ENSGALG00000013568,ENSGALG00000006785,ENSGALG00000015216,ENSGALG00000016852,…
GO:0032944	regulation of mononuclear cell proliferation	biological_process	1.97e-06	0.00027833	17	630	100	14096	ENSGALG00000001486,ENSGALG00000013481,ENSGALG00000006785,ENSGALG00000012456,ENSGALG00000015216,ENSGALG00000016852,ENSGALG00000007001,ENSGALG00000014561,ENSGALG00000012755,ENSGALG00000035386,ENSGALG00000015032,ENSGALG00000043603,ENSGALG00000007416,ENSGALG00000032530,ENSGALG00000034970,ENSGALG00000006415,ENSGALG00000004594
GO:0050670	regulation of lymphocyte proliferation	biological_process	1.97e-06	0.00027833	17	630	100	14096	ENSGALG00000015216,ENSGALG00000016852,ENSGALG00000007001,ENSGALG00000006785,ENSGALG00000012456,ENSGALG00000013481,ENSGALG00000001486,ENSGALG00000004594,ENSGALG00000032530,ENSGALG00000007416,ENSGALG00000034970,ENSGALG00000006415,ENSGALG00000043603,ENSGALG00000015032,ENSGALG00000012755,ENSGALG00000035386,ENSGALG00000014561
GO:0097530	granulocyte migration	biological_process	2.07e-06	0.00029005	12	630	51	14096	ENSGALG00000012456,ENSGALG00000002329,ENSGALG00000024470,ENSGALG00000011668,ENSGALG00000015216,ENSGALG00000004594,ENSGALG00000032717,ENSGALG00000007511,ENSGALG00000035386,ENSGALG00000014585,ENSGALG00000043603,ENSGALG00000035733
GO:0050865	regulation of cell activation	biological_process	2.67e-06	0.00037145	27	630	225	14096	ENSGALG00000006785,ENSGALG00000012456,ENSGALG00000013372,ENSGALG00000013568,ENSGALG00000040926,ENSGALG00000015216,ENSGALG00000016852,ENSGALG00000007001,ENSGALG00000000466,ENSGALG00000001486,ENSGALG00000013481,ENSGALG00000031735,ENSGALG00000009626,ENSGALG00000007416,ENSGALG00000026163,ENSGALG00000032530,ENSGALG00000006415,ENSGALG00000034970,ENSGALG00000004594,ENSGALG00000037437,ENSGALG00000012755,…
GO:0006959	humoral immune response	biological_process	3.01e-06	0.00041482	13	630	61	14096	ENSGALG00000008447,ENSGALG00000032231,ENSGALG00000009388,ENSGALG00000014659,ENSGALG00000011551,ENSGALG00000002160,ENSGALG00000004771,ENSGALG00000035733,ENSGALG00000023622,ENSGALG00000029270,ENSGALG00000014603,ENSGALG00000014561,ENSGALG00000021569
GO:0045785	positive regulation of cell adhesion	biological_process	3.37e-06	0.00046134	24	630	189	14096	ENSGALG00000031735,ENSGALG00000001486,ENSGALG00000000466,ENSGALG00000016852,ENSGALG00000015216,ENSGALG00000013372,ENSGALG00000013568,ENSGALG00000010583,ENSGALG00000029270,ENSGALG00000043603,ENSGALG00000035733,ENSGALG00000014561,ENSGALG00000012755,ENSGALG00000015032,ENSGALG00000035386,ENSGALG00000037437,ENSGALG00000007579,ENSGALG00000004594,ENSGALG00000034970,ENSGALG00000006415,ENSGALG00000016564,…
GO:0032753	positive regulation of interleukin-4 production	biological_process	3.62e-06	0.00049135	6	630	11	14096	ENSGALG00000006415,ENSGALG00000034970,ENSGALG00000032530,ENSGALG00000007416,ENSGALG00000012830,ENSGALG00000029270
GO:0032609	interferon-gamma production	biological_process	4.5e-06	0.000598	11	630	46	14096	ENSGALG00000013468,ENSGALG00000016590,ENSGALG00000015032,ENSGALG00000029270,ENSGALG00000027247,ENSGALG00000003857,ENSGALG00000035733,ENSGALG00000032530,ENSGALG00000007416,ENSGALG00000005757,ENSGALG00000007001
GO:0002690	positive regulation of leukocyte chemotaxis	biological_process	5e-06	0.00065874	10	630	38	14096	ENSGALG00000011668,ENSGALG00000011733,ENSGALG00000004594,ENSGALG00000012456,ENSGALG00000016564,ENSGALG00000043603,ENSGALG00000035733,ENSGALG00000006346,ENSGALG00000037077,ENSGALG00000035386
GO:0042102	positive regulation of T cell proliferation	biological_process	5.11e-06	0.00066829	10	630	38	14096	ENSGALG00000015216,ENSGALG00000016852,ENSGALG00000032530,ENSGALG00000007416,ENSGALG00000006415,ENSGALG00000034970,ENSGALG00000043603,ENSGALG00000035386,ENSGALG00000012755,ENSGALG00000001486
GO:0002699	positive regulation of immune effector process	biological_process	5.41e-06	0.00070257	14	630	76	14096	ENSGALG00000001486,ENSGALG00000002160,ENSGALG00000003863,ENSGALG00000029270,ENSGALG00000032530,ENSGALG00000012456,ENSGALG00000013568,ENSGALG00000016400,ENSGALG00000015216,ENSGALG00000007001,ENSGALG00000004594,ENSGALG00000008447,ENSGALG00000006527,ENSGALG00000029381
GO:0033077	T cell differentiation in thymus	biological_process	5.68e-06	0.00072664	11	630	48	14096	ENSGALG00000013372,ENSGALG00000002080,ENSGALG00000007416,ENSGALG00000039228,ENSGALG00000037437,ENSGALG00000031862,ENSGALG00000004594,ENSGALG00000001486,ENSGALG00000029270,ENSGALG00000002160,ENSGALG00000035733
GO:0071594	thymocyte aggregation	biological_process	5.68e-06	0.00072664	11	630	48	14096	ENSGALG00000004594,ENSGALG00000031862,ENSGALG00000037437,ENSGALG00000039228,ENSGALG00000007416,ENSGALG00000002080,ENSGALG00000013372,ENSGALG00000002160,ENSGALG00000035733,ENSGALG00000029270,ENSGALG00000001486
GO:0002720	positive regulation of cytokine production involved in immune response	biological_process	6.75e-06	0.00085763	7	630	18	14096	ENSGALG00000029270,ENSGALG00000007001,ENSGALG00000002160,ENSGALG00000004594,ENSGALG00000013568,ENSGALG00000016400,ENSGALG00000032530
GO:0002440	production of molecular mediator of immune response	biological_process	7.23e-06	0.00091286	15	630	88	14096	ENSGALG00000002160,ENSGALG00000029270,ENSGALG00000034721,ENSGALG00000021139,ENSGALG00000013468,ENSGALG00000016852,ENSGALG00000004594,ENSGALG00000007001,ENSGALG00000005937,ENSGALG00000032530,ENSGALG00000005919,ENSGALG00000016400,ENSGALG00000013372,ENSGALG00000013568,ENSGALG00000006415
GO:0050851	antigen receptor-mediated signaling pathway	biological_process	7.41e-06	0.00092894	13	630	68	14096	ENSGALG00000035733,ENSGALG00000003857,ENSGALG00000029270,ENSGALG00000035386,ENSGALG00000014561,ENSGALG00000001486,ENSGALG00000037943,ENSGALG00000015216,ENSGALG00000002192,ENSGALG00000002113,ENSGALG00000016173,ENSGALG00000007416,ENSGALG00000016661
GO:0009967	positive regulation of signal transduction	biological_process	7.8e-06	0.00097125	61	630	769	14096	ENSGALG00000014561,ENSGALG00000035733,ENSGALG00000043603,ENSGALG00000029270,ENSGALG00000000681,ENSGALG00000014858,ENSGALG00000003103,ENSGALG00000024470,ENSGALG00000007416,ENSGALG00000039682,ENSGALG00000016564,ENSGALG00000002329,ENSGALG00000012442,ENSGALG00000043650,ENSGALG00000021567,ENSGALG00000000466,ENSGALG00000016590,ENSGALG00000013468,ENSGALG00000005547,ENSGALG00000025887,ENSGALG00000009626,…
GO:0043374	CD8-positive, alpha-beta T cell differentiation	biological_process	8.63e-06	0.0010524	5	630	8	14096	ENSGALG00000027247,ENSGALG00000007121,ENSGALG00000022750,ENSGALG00000006785,ENSGALG00000035386
GO:1903708	positive regulation of hemopoiesis	biological_process	9.14e-06	0.0010994	15	630	90	14096	ENSGALG00000029270,ENSGALG00000033520,ENSGALG00000001486,ENSGALG00000010707,ENSGALG00000035386,ENSGALG00000037437,ENSGALG00000004594,ENSGALG00000015216,ENSGALG00000013372,ENSGALG00000010770,ENSGALG00000039682,ENSGALG00000039228,ENSGALG00000026163,ENSGALG00000016022,ENSGALG00000032530
GO:0002688	regulation of leukocyte chemotaxis	biological_process	1.06e-05	0.0012605	11	630	50	14096	ENSGALG00000016564,ENSGALG00000022750,ENSGALG00000012456,ENSGALG00000004594,ENSGALG00000011668,ENSGALG00000011733,ENSGALG00000035386,ENSGALG00000006346,ENSGALG00000035733,ENSGALG00000037077,ENSGALG00000043603
GO:0032633	interleukin-4 production	biological_process	1.21e-05	0.0014373	7	630	19	14096	ENSGALG00000012830,ENSGALG00000029270,ENSGALG00000003857,ENSGALG00000034970,ENSGALG00000006415,ENSGALG00000032530,ENSGALG00000007416
GO:1902105	regulation of leukocyte differentiation	biological_process	1.24e-05	0.0014616	18	630	127	14096	ENSGALG00000004594,ENSGALG00000037437,ENSGALG00000039682,ENSGALG00000026163,ENSGALG00000032530,ENSGALG00000033520,ENSGALG00000029270,ENSGALG00000014561,ENSGALG00000035386,ENSGALG00000010707,ENSGALG00000015216,ENSGALG00000006785,ENSGALG00000039228,ENSGALG00000029669,ENSGALG00000016022,ENSGALG00000013372,ENSGALG00000013481,ENSGALG00000001486
GO:0042107	cytokine metabolic process	biological_process	1.35e-05	0.0015761	11	630	52	14096	ENSGALG00000012830,ENSGALG00000029270,ENSGALG00000009626,ENSGALG00000013468,ENSGALG00000016590,ENSGALG00000015216,ENSGALG00000007001,ENSGALG00000034970,ENSGALG00000007416,ENSGALG00000007174,ENSGALG00000006785
GO:0019884	antigen processing and presentation of exogenous antigen	biological_process	1.71e-05	0.0019749	6	630	14	14096	ENSGALG00000029381,ENSGALG00000043052,ENSGALG00000002160,ENSGALG00000004594,ENSGALG00000030270,ENSGALG00000033694
GO:0002705	positive regulation of leukocyte mediated immunity	biological_process	1.76e-05	0.0020242	10	630	44	14096	ENSGALG00000032530,ENSGALG00000016400,ENSGALG00000015216,ENSGALG00000008447,ENSGALG00000006527,ENSGALG00000029381,ENSGALG00000001486,ENSGALG00000002160,ENSGALG00000003863,ENSGALG00000029270
GO:0045060	negative thymic T cell selection	biological_process	1.81e-05	0.0020611	5	630	9	14096	ENSGALG00000007416,ENSGALG00000002080,ENSGALG00000001486,ENSGALG00000004594,ENSGALG00000035733
GO:0045089	positive regulation of innate immune response	biological_process	1.88e-05	0.002129	15	630	96	14096	ENSGALG00000023411,ENSGALG00000041192,ENSGALG00000006785,ENSGALG00000001256,ENSGALG00000016400,ENSGALG00000007001,ENSGALG00000003580,ENSGALG00000008447,ENSGALG00000006527,ENSGALG00000043650,ENSGALG00000016590,ENSGALG00000013468,ENSGALG00000005547,ENSGALG00000012830,ENSGALG00000032701
GO:0032673	regulation of interleukin-4 production	biological_process	1.91e-05	0.0021549	6	630	14	14096	ENSGALG00000006415,ENSGALG00000034970,ENSGALG00000032530,ENSGALG00000007416,ENSGALG00000012830,ENSGALG00000029270
GO:0036037	CD8-positive, alpha-beta T cell activation	biological_process	1.97e-05	0.0022019	5	630	9	14096	ENSGALG00000027247,ENSGALG00000007121,ENSGALG00000022750,ENSGALG00000035386,ENSGALG00000006785
GO:0031347	regulation of defense response	biological_process	1.98e-05	0.0022019	30	630	293	14096	ENSGALG00000035505,ENSGALG00000007001,ENSGALG00000023411,ENSGALG00000039458,ENSGALG00000041192,ENSGALG00000006785,ENSGALG00000016400,ENSGALG00000012830,ENSGALG00000000168,ENSGALG00000014585,ENSGALG00000016590,ENSGALG00000029354,ENSGALG00000013468,ENSGALG00000032717,ENSGALG00000005547,ENSGALG00000027512,ENSGALG00000008447,ENSGALG00000003580,ENSGALG00000009388,ENSGALG00000006527,ENSGALG00000043650,…
GO:0051240	positive regulation of multicellular organismal process	biological_process	2.21e-05	0.002426	62	630	818	14096	ENSGALG00000013468,ENSGALG00000016590,ENSGALG00000023517,ENSGALG00000009875,ENSGALG00000009626,ENSGALG00000016293,ENSGALG00000016400,ENSGALG00000010770,ENSGALG00000039228,ENSGALG00000005725,ENSGALG00000007001,ENSGALG00000015216,ENSGALG00000005043,ENSGALG00000037943,ENSGALG00000000314,ENSGALG00000010707,ENSGALG00000015032,ENSGALG00000035386,ENSGALG00000014858,ENSGALG00000029270,ENSGALG00000035733,…
GO:0072676	lymphocyte migration	biological_process	2.25e-05	0.0024617	9	630	35	14096	ENSGALG00000032717,ENSGALG00000014585,ENSGALG00000029270,ENSGALG00000043603,ENSGALG00000006346,ENSGALG00000005644,ENSGALG00000002329,ENSGALG00000016564,ENSGALG00000024470
GO:0006909	phagocytosis	biological_process	2.42e-05	0.0026095	13	630	76	14096	ENSGALG00000035386,ENSGALG00000011646,ENSGALG00000012119,ENSGALG00000003863,ENSGALG00000009626,ENSGALG00000016661,ENSGALG00000005644,ENSGALG00000008601,ENSGALG00000031301,ENSGALG00000002080,ENSGALG00000005757,ENSGALG00000001446,ENSGALG00000015216
GO:0042035	regulation of cytokine biosynthetic process	biological_process	2.48e-05	0.0026492	10	630	46	14096	ENSGALG00000013468,ENSGALG00000016590,ENSGALG00000012830,ENSGALG00000029270,ENSGALG00000009626,ENSGALG00000034970,ENSGALG00000007416,ENSGALG00000006785,ENSGALG00000015216,ENSGALG00000007001
GO:0002687	positive regulation of leukocyte migration	biological_process	2.68e-05	0.002843	10	630	45	14096	ENSGALG00000011668,ENSGALG00000011733,ENSGALG00000004594,ENSGALG00000012456,ENSGALG00000016564,ENSGALG00000043603,ENSGALG00000035733,ENSGALG00000006346,ENSGALG00000037077,ENSGALG00000035386
GO:0002456	T cell mediated immunity	biological_process	2.77e-05	0.0029122	9	630	37	14096	ENSGALG00000002160,ENSGALG00000003863,ENSGALG00000029270,ENSGALG00000038559,ENSGALG00000029381,ENSGALG00000032530,ENSGALG00000005644,ENSGALG00000016400,ENSGALG00000013372
GO:0032946	positive regulation of mononuclear cell proliferation	biological_process	2.8e-05	0.0029122	12	630	65	14096	ENSGALG00000043603,ENSGALG00000012755,ENSGALG00000035386,ENSGALG00000001486,ENSGALG00000016852,ENSGALG00000004594,ENSGALG00000007001,ENSGALG00000015216,ENSGALG00000032530,ENSGALG00000007416,ENSGALG00000034970,ENSGALG00000006415
GO:0050671	positive regulation of lymphocyte proliferation	biological_process	2.8e-05	0.0029122	12	630	65	14096	ENSGALG00000043603,ENSGALG00000035386,ENSGALG00000012755,ENSGALG00000001486,ENSGALG00000007001,ENSGALG00000016852,ENSGALG00000015216,ENSGALG00000004594,ENSGALG00000007416,ENSGALG00000032530,ENSGALG00000006415,ENSGALG00000034970
GO:0045088	regulation of innate immune response	biological_process	2.81e-05	0.0029122	16	630	111	14096	ENSGALG00000012830,ENSGALG00000016590,ENSGALG00000013468,ENSGALG00000005547,ENSGALG00000007001,ENSGALG00000041192,ENSGALG00000006785,ENSGALG00000023411,ENSGALG00000016400,ENSGALG00000032701,ENSGALG00000004974,ENSGALG00000003580,ENSGALG00000008447,ENSGALG00000043650,ENSGALG00000006527,ENSGALG00000001256
GO:0030155	regulation of cell adhesion	biological_process	2.86e-05	0.0029456	33	630	347	14096	ENSGALG00000023689,ENSGALG00000021567,ENSGALG00000037437,ENSGALG00000007579,ENSGALG00000007416,ENSGALG00000016564,ENSGALG00000043603,ENSGALG00000029270,ENSGALG00000035733,ENSGALG00000014561,ENSGALG00000015032,ENSGALG00000035386,ENSGALG00000015216,ENSGALG00000012456,ENSGALG00000012545,ENSGALG00000031735,ENSGALG00000009626,ENSGALG00000000466,ENSGALG00000004594,ENSGALG00000003580,ENSGALG00000006415,…
GO:0050850	positive regulation of calcium-mediated signaling	biological_process	2.95e-05	0.0030245	6	630	15	14096	ENSGALG00000015422,ENSGALG00000007416,ENSGALG00000012755,ENSGALG00000001486,ENSGALG00000015216,ENSGALG00000033510
GO:0035587	purinergic receptor signaling pathway	biological_process	3.46e-05	0.0035235	7	630	22	14096	ENSGALG00000001462,ENSGALG00000017327,ENSGALG00000039432,ENSGALG00000000168,ENSGALG00000016227,ENSGALG00000003863,ENSGALG00000000783
GO:0043383	negative T cell selection	biological_process	3.52e-05	0.0035674	5	630	10	14096	ENSGALG00000001486,ENSGALG00000002080,ENSGALG00000007416,ENSGALG00000004594,ENSGALG00000035733
GO:0002718	regulation of cytokine production involved in immune response	biological_process	3.55e-05	0.0035683	8	630	30	14096	ENSGALG00000013568,ENSGALG00000016400,ENSGALG00000032530,ENSGALG00000004594,ENSGALG00000007001,ENSGALG00000013468,ENSGALG00000029270,ENSGALG00000002160
GO:0002709	regulation of T cell mediated immunity	biological_process	3.56e-05	0.0035683	7	630	22	14096	ENSGALG00000029270,ENSGALG00000029381,ENSGALG00000002160,ENSGALG00000003863,ENSGALG00000016400,ENSGALG00000013372,ENSGALG00000032530
GO:0045061	thymic T cell selection	biological_process	4.05e-05	0.0040364	6	630	16	14096	ENSGALG00000001486,ENSGALG00000002080,ENSGALG00000007416,ENSGALG00000029270,ENSGALG00000035733,ENSGALG00000004594
GO:0006631	fatty acid metabolic process	biological_process	4.36e-05	0.0043021	21	630	177	14096	ENSGALG00000026781,ENSGALG00000010628,ENSGALG00000016536,ENSGALG00000021238,ENSGALG00000036990,ENSGALG00000017394,ENSGALG00000005857,ENSGALG00000004594,ENSGALG00000005739,ENSGALG00000043591,ENSGALG00000002891,ENSGALG00000005034,ENSGALG00000006644,ENSGALG00000009442,ENSGALG00000040553,ENSGALG00000008040,ENSGALG00000013568,ENSGALG00000015216,ENSGALG00000005043,ENSGALG00000002925,ENSGALG00000000184
GO:0048247	lymphocyte chemotaxis	biological_process	4.37e-05	0.0043021	7	630	22	14096	ENSGALG00000006346,ENSGALG00000014585,ENSGALG00000043603,ENSGALG00000016564,ENSGALG00000024470,ENSGALG00000032717,ENSGALG00000002329
GO:0002366	leukocyte activation involved in immune response	biological_process	4.42e-05	0.0043245	16	630	114	14096	ENSGALG00000027247,ENSGALG00000029270,ENSGALG00000012442,ENSGALG00000007579,ENSGALG00000016564,ENSGALG00000002080,ENSGALG00000006415,ENSGALG00000012830,ENSGALG00000001486,ENSGALG00000007001,ENSGALG00000015216,ENSGALG00000038000,ENSGALG00000023411,ENSGALG00000013568,ENSGALG00000012456,ENSGALG00000016986
GO:0070665	positive regulation of leukocyte proliferation	biological_process	4.46e-05	0.004346	12	630	68	14096	ENSGALG00000035386,ENSGALG00000012755,ENSGALG00000001486,ENSGALG00000043603,ENSGALG00000032530,ENSGALG00000007416,ENSGALG00000034970,ENSGALG00000006415,ENSGALG00000007001,ENSGALG00000016852,ENSGALG00000004594,ENSGALG00000015216
GO:0002819	regulation of adaptive immune response	biological_process	4.68e-05	0.0045372	11	630	59	14096	ENSGALG00000029270,ENSGALG00000002160,ENSGALG00000003863,ENSGALG00000014561,ENSGALG00000029381,ENSGALG00000016852,ENSGALG00000013372,ENSGALG00000034970,ENSGALG00000016400,ENSGALG00000040926,ENSGALG00000032530
GO:0023056	positive regulation of signaling	biological_process	5.16e-05	0.0049676	63	630	853	14096	ENSGALG00000011203,ENSGALG00000003144,ENSGALG00000012755,ENSGALG00000008281,ENSGALG00000009724,ENSGALG00000032701,ENSGALG00000017068,ENSGALG00000003863,ENSGALG00000012594,ENSGALG00000031997,ENSGALG00000001256,ENSGALG00000006415,ENSGALG00000026163,ENSGALG00000011008,ENSGALG00000041043,ENSGALG00000004398,ENSGALG00000013869,ENSGALG00000004594,ENSGALG00000001486,ENSGALG00000032717,Novel01265,ENSGALG0…
GO:0002263	cell activation involved in immune response	biological_process	5.41e-05	0.0051887	16	630	116	14096	ENSGALG00000012442,ENSGALG00000007579,ENSGALG00000006415,ENSGALG00000016564,ENSGALG00000002080,ENSGALG00000027247,ENSGALG00000029270,ENSGALG00000038000,ENSGALG00000007001,ENSGALG00000015216,ENSGALG00000013568,ENSGALG00000012456,ENSGALG00000016986,ENSGALG00000023411,ENSGALG00000012830,ENSGALG00000001486
GO:0032649	regulation of interferon-gamma production	biological_process	5.47e-05	0.0052182	9	630	40	14096	ENSGALG00000007416,ENSGALG00000032530,ENSGALG00000005757,ENSGALG00000007001,ENSGALG00000013468,ENSGALG00000016590,ENSGALG00000015032,ENSGALG00000029270,ENSGALG00000035733
GO:0050920	regulation of chemotaxis	biological_process	5.53e-05	0.0052472	15	630	105	14096	ENSGALG00000011733,ENSGALG00000011668,ENSGALG00000004594,ENSGALG00000012456,ENSGALG00000011309,ENSGALG00000022750,ENSGALG00000016564,ENSGALG00000043603,ENSGALG00000007806,ENSGALG00000009626,ENSGALG00000037077,ENSGALG00000035733,ENSGALG00000006346,ENSGALG00000006388,ENSGALG00000035386
GO:0045582	positive regulation of T cell differentiation	biological_process	5.65e-05	0.0053272	8	630	32	14096	ENSGALG00000029270,ENSGALG00000001486,ENSGALG00000035386,ENSGALG00000037437,ENSGALG00000015216,ENSGALG00000004594,ENSGALG00000013372,ENSGALG00000032530
GO:0002706	regulation of lymphocyte mediated immunity	biological_process	5.96e-05	0.0055593	10	630	50	14096	ENSGALG00000029270,ENSGALG00000003863,ENSGALG00000002160,ENSGALG00000014561,ENSGALG00000029381,ENSGALG00000006527,ENSGALG00000008447,ENSGALG00000013372,ENSGALG00000016400,ENSGALG00000032530
GO:1903706	regulation of hemopoiesis	biological_process	6.27e-05	0.0058241	21	630	183	14096	ENSGALG00000013481,ENSGALG00000001486,ENSGALG00000008127,ENSGALG00000015216,ENSGALG00000013372,ENSGALG00000010770,ENSGALG00000006785,ENSGALG00000039228,ENSGALG00000016022,ENSGALG00000029669,ENSGALG00000029270,ENSGALG00000033520,ENSGALG00000010707,ENSGALG00000035386,ENSGALG00000014561,ENSGALG00000037437,ENSGALG00000004594,ENSGALG00000039682,ENSGALG00000016564,ENSGALG00000026163,ENSGALG00000032530
GO:0002711	positive regulation of T cell mediated immunity	biological_process	6.37e-05	0.0058858	6	630	17	14096	ENSGALG00000032530,ENSGALG00000016400,ENSGALG00000002160,ENSGALG00000003863,ENSGALG00000029270,ENSGALG00000029381
GO:0031294	lymphocyte costimulation	biological_process	6.55e-05	0.0059597	5	630	11	14096	ENSGALG00000035733,ENSGALG00000031735,ENSGALG00000016852,ENSGALG00000015032,ENSGALG00000007416
GO:0031295	T cell costimulation	biological_process	6.55e-05	0.0059597	5	630	11	14096	ENSGALG00000007416,ENSGALG00000015032,ENSGALG00000031735,ENSGALG00000016852,ENSGALG00000035733
GO:0042089	cytokine biosynthetic process	biological_process	6.56e-05	0.0059597	10	630	51	14096	ENSGALG00000015216,ENSGALG00000007001,ENSGALG00000006785,ENSGALG00000007416,ENSGALG00000034970,ENSGALG00000009626,ENSGALG00000029270,ENSGALG00000012830,ENSGALG00000016590,ENSGALG00000013468
GO:0046633	alpha-beta T cell proliferation	biological_process	6.58e-05	0.0059597	5	630	11	14096	ENSGALG00000001486,ENSGALG00000002080,ENSGALG00000007416,ENSGALG00000006785,ENSGALG00000015216
GO:0032735	positive regulation of interleukin-12 production	biological_process	6.64e-05	0.0059755	6	630	17	14096	ENSGALG00000005757,ENSGALG00000035733,ENSGALG00000007001,ENSGALG00000006415,ENSGALG00000013468,ENSGALG00000006785
GO:0034154	toll-like receptor 7 signaling pathway	biological_process	6.71e-05	0.0060026	3	630	3	14096	ENSGALG00000005547,ENSGALG00000016400,ENSGALG00000016590
GO:0002548	monocyte chemotaxis	biological_process	6.73e-05	0.0060026	8	630	31	14096	ENSGALG00000011733,ENSGALG00000002329,ENSGALG00000026163,ENSGALG00000024470,ENSGALG00000043603,ENSGALG00000014585,ENSGALG00000037077,ENSGALG00000032717
GO:0045860	positive regulation of protein kinase activity	biological_process	6.87e-05	0.0060934	25	630	241	14096	ENSGALG00000007174,ENSGALG00000040553,ENSGALG00000002113,ENSGALG00000005725,ENSGALG00000007001,ENSGALG00000015216,ENSGALG00000000839,ENSGALG00000033510,ENSGALG00000015422,Novel01265,ENSGALG00000009626,ENSGALG00000002840,ENSGALG00000016564,ENSGALG00000003103,ENSGALG00000026163,ENSGALG00000011008,ENSGALG00000006415,ENSGALG00000004398,ENSGALG00000012755,ENSGALG00000003863,ENSGALG00000010628,ENSGALG0…
GO:0035588	G-protein coupled purinergic receptor signaling pathway	biological_process	7.05e-05	0.0062209	6	630	17	14096	ENSGALG00000001462,ENSGALG00000017327,ENSGALG00000016227,ENSGALG00000039432,ENSGALG00000000168,ENSGALG00000000783
GO:0046634	regulation of alpha-beta T cell activation	biological_process	7.38e-05	0.0064495	8	630	33	14096	ENSGALG00000015216,ENSGALG00000034970,ENSGALG00000006785,ENSGALG00000032530,ENSGALG00000007416,ENSGALG00000029270,ENSGALG00000001486,ENSGALG00000035386
GO:0071356	cellular response to tumor necrosis factor	biological_process	7.42e-05	0.0064545	13	630	82	14096	ENSGALG00000001882,ENSGALG00000032717,ENSGALG00000014585,ENSGALG00000029270,ENSGALG00000043603,ENSGALG00000033520,ENSGALG00000002329,ENSGALG00000026525,ENSGALG00000016564,ENSGALG00000026163,ENSGALG00000039228,ENSGALG00000024470,ENSGALG00000015216
GO:0002685	regulation of leukocyte migration	biological_process	8.17e-05	0.0070359	12	630	72	14096	ENSGALG00000004594,ENSGALG00000011668,ENSGALG00000011733,ENSGALG00000022750,ENSGALG00000016564,ENSGALG00000012456,ENSGALG00000037077,ENSGALG00000035733,ENSGALG00000006346,ENSGALG00000043603,ENSGALG00000000168,ENSGALG00000035386
GO:0032655	regulation of interleukin-12 production	biological_process	8.25e-05	0.0070774	7	630	25	14096	ENSGALG00000005757,ENSGALG00000035733,ENSGALG00000007001,ENSGALG00000009626,ENSGALG00000006415,ENSGALG00000013468,ENSGALG00000006785
GO:0048583	regulation of response to stimulus	biological_process	8.8e-05	0.00751	124	630	2030	14096	ENSGALG00000029270,ENSGALG00000043603,ENSGALG00000004771,ENSGALG00000002160,ENSGALG00000010707,ENSGALG00000014561,ENSGALG00000009388,ENSGALG00000021567,ENSGALG00000043650,ENSGALG00000029381,ENSGALG00000012442,ENSGALG00000002329,ENSGALG00000003103,ENSGALG00000009875,ENSGALG00000016293,ENSGALG00000009626,ENSGALG00000006346,ENSGALG00000025887,ENSGALG00000000466,ENSGALG00000019761,ENSGALG00000004960,…
GO:0033630	positive regulation of cell adhesion mediated by integrin	biological_process	8.93e-05	0.0075823	5	630	12	14096	ENSGALG00000001486,ENSGALG00000014561,ENSGALG00000035386,ENSGALG00000043603,ENSGALG00000015216
GO:0071346	cellular response to interferon-gamma	biological_process	9.03e-05	0.0076325	8	630	33	14096	ENSGALG00000043603,ENSGALG00000014585,ENSGALG00000004974,ENSGALG00000032717,ENSGALG00000001256,ENSGALG00000002329,ENSGALG00000024470,ENSGALG00000006785
GO:0010647	positive regulation of cell communication	biological_process	9.39e-05	0.0078639	63	630	871	14096	ENSGALG00000014585,ENSGALG00000008177,ENSGALG00000002840,Novel01265,ENSGALG00000001486,ENSGALG00000032717,ENSGALG00000015422,ENSGALG00000000839,ENSGALG00000033510,ENSGALG00000016661,ENSGALG00000023411,ENSGALG00000028821,ENSGALG00000039458,ENSGALG00000008281,ENSGALG00000009724,ENSGALG00000032701,ENSGALG00000017068,ENSGALG00000003863,ENSGALG00000011203,ENSGALG00000003144,ENSGALG00000012755,ENSGALG0…
GO:0033539	fatty acid beta-oxidation using acyl-CoA dehydrogenase	biological_process	9.76e-05	0.0080797	5	630	12	14096	ENSGALG00000002891,ENSGALG00000002925,ENSGALG00000008040,ENSGALG00000005034,ENSGALG00000009442
GO:0001910	regulation of leukocyte mediated cytotoxicity	biological_process	0.00010071	0.0082793	6	630	18	14096	ENSGALG00000013372,ENSGALG00000008447,ENSGALG00000003863,ENSGALG00000002160,ENSGALG00000029381,ENSGALG00000006527
GO:0032481	positive regulation of type I interferon production	biological_process	0.00010328	0.0084518	6	630	19	14096	ENSGALG00000016590,ENSGALG00000041192,ENSGALG00000006785,ENSGALG00000013468,ENSGALG00000015216,ENSGALG00000007001
GO:0033993	response to lipid	biological_process	0.00010439	0.0085035	30	630	320	14096	ENSGALG00000043650,ENSGALG00000005757,ENSGALG00000040418,ENSGALG00000016564,ENSGALG00000017195,ENSGALG00000003863,ENSGALG00000035733,ENSGALG00000000783,ENSGALG00000002160,ENSGALG00000032701,ENSGALG00000043603,ENSGALG00000029270,ENSGALG00000028982,ENSGALG00000017327,ENSGALG00000001882,ENSGALG00000003144,ENSGALG00000004974,ENSGALG00000011801,ENSGALG00000007001,ENSGALG00000011668,Novel03081,ENSGALG0…
GO:0032615	interleukin-12 production	biological_process	0.00010779	0.008741	7	630	26	14096	ENSGALG00000006415,ENSGALG00000013468,ENSGALG00000006785,ENSGALG00000005757,ENSGALG00000035733,ENSGALG00000007001,ENSGALG00000009626
GO:0050852	T cell receptor signaling pathway	biological_process	0.0001127	0.00893	9	630	44	14096	ENSGALG00000001486,ENSGALG00000014561,ENSGALG00000029270,ENSGALG00000035733,ENSGALG00000003857,ENSGALG00000002113,ENSGALG00000007416,ENSGALG00000016173,ENSGALG00000002192
GO:0043207	response to external biotic stimulus	biological_process	0.00011311	0.00893	35	630	398	14096	ENSGALG00000039458,ENSGALG00000023411,ENSGALG00000006785,ENSGALG00000041192,ENSGALG00000011668,ENSGALG00000029354,ENSGALG00000012830,ENSGALG00000001256,ENSGALG00000039982,ENSGALG00000006756,ENSGALG00000035516,ENSGALG00000003863,ENSGALG00000000783,ENSGALG00000023622,ENSGALG00000028982,ENSGALG00000032701,ENSGALG00000003217,ENSGALG00000011551,ENSGALG00000016400,ENSGALG00000015216,ENSGALG00000007001,…
GO:0051707	response to other organism	biological_process	0.00011311	0.00893	35	630	398	14096	ENSGALG00000029381,ENSGALG00000043650,ENSGALG00000005757,ENSGALG00000003103,ENSGALG00000029270,ENSGALG00000043603,ENSGALG00000035733,ENSGALG00000002160,ENSGALG00000001882,ENSGALG00000013723,ENSGALG00000035325,ENSGALG00000007001,ENSGALG00000015216,ENSGALG00000016400,ENSGALG00000011551,ENSGALG00000003217,ENSGALG00000007121,ENSGALG00000013468,ENSGALG00000016590,ENSGALG00000001256,ENSGALG00000032701,…
GO:0033674	positive regulation of kinase activity	biological_process	0.00011355	0.00893	26	630	264	14096	ENSGALG00000015422,Novel01265,ENSGALG00000009626,ENSGALG00000002840,ENSGALG00000007174,ENSGALG00000040553,ENSGALG00000002113,ENSGALG00000005725,ENSGALG00000007001,ENSGALG00000015216,ENSGALG00000000839,ENSGALG00000033510,ENSGALG00000012755,ENSGALG00000003863,ENSGALG00000010628,ENSGALG00000014858,ENSGALG00000009724,ENSGALG00000008281,ENSGALG00000000681,ENSGALG00000016564,ENSGALG00000003103,ENSGALG0…
GO:0042492	gamma-delta T cell differentiation	biological_process	0.00011361	0.00893	4	630	7	14096	ENSGALG00000022750,ENSGALG00000035386,ENSGALG00000037437,ENSGALG00000015216
GO:0046629	gamma-delta T cell activation	biological_process	0.00011361	0.00893	4	630	7	14096	ENSGALG00000022750,ENSGALG00000035386,ENSGALG00000015216,ENSGALG00000037437
GO:0034612	response to tumor necrosis factor	biological_process	0.0001208	0.0094533	13	630	86	14096	ENSGALG00000043603,ENSGALG00000029270,ENSGALG00000014585,ENSGALG00000033520,ENSGALG00000032717,ENSGALG00000001882,ENSGALG00000015216,ENSGALG00000002329,ENSGALG00000026163,ENSGALG00000024470,ENSGALG00000039228,ENSGALG00000026525,ENSGALG00000016564
GO:0002697	regulation of immune effector process	biological_process	0.00012134	0.0094544	21	630	191	14096	ENSGALG00000015216,ENSGALG00000007001,ENSGALG00000013372,ENSGALG00000013568,ENSGALG00000016400,ENSGALG00000012456,ENSGALG00000039458,ENSGALG00000001486,ENSGALG00000013468,ENSGALG00000029354,ENSGALG00000009388,ENSGALG00000006527,ENSGALG00000029381,ENSGALG00000004594,ENSGALG00000008447,ENSGALG00000006415,ENSGALG00000032530,ENSGALG00000029270,ENSGALG00000002160,ENSGALG00000003863,ENSGALG00000014561
GO:0002224	toll-like receptor signaling pathway	biological_process	0.00012511	0.0096689	10	630	55	14096	ENSGALG00000016590,ENSGALG00000005547,ENSGALG00000013468,ENSGALG00000032701,ENSGALG00000012830,ENSGALG00000006785,ENSGALG00000023411,ENSGALG00000016400,ENSGALG00000007001,ENSGALG00000043650
GO:0002822	regulation of adaptive immune response based on somatic recombination of immune receptors built from immunoglobulin superfamily domains	biological_process	0.00012998	0.0099971	10	630	55	14096	ENSGALG00000029270,ENSGALG00000003863,ENSGALG00000002160,ENSGALG00000014561,ENSGALG00000029381,ENSGALG00000016852,ENSGALG00000016400,ENSGALG00000013372,ENSGALG00000034970,ENSGALG00000032530
GO:0044425	membrane part	cellular_component	2.03e-15	4.55e-12	267	630	3976	14096	ENSGALG00000017394,ENSGALG00000028659,ENSGALG00000007867,ENSGALG00000041101,ENSGALG00000013575,ENSGALG00000040553,ENSGALG00000008656,ENSGALG00000016661,ENSGALG00000016852,ENSGALG00000005845,ENSGALG00000005259,ENSGALG00000015461,ENSGALG00000038559,ENSGALG00000021362,ENSGALG00000014561,ENSGALG00000015032,ENSGALG00000013060,ENSGALG00000002160,Novel03084,ENSGALG00000043052,ENSGALG00000001698,ENSGALG0…
GO:0016021	integral component of membrane	cellular_component	4.59e-14	5.49e-11	224	630	3215	14096	ENSGALG00000001882,ENSGALG00000007216,ENSGALG00000017327,Novel01761,ENSGALG00000039080,ENSGALG00000035733,ENSGALG00000005638,ENSGALG00000005964,ENSGALG00000008442,ENSGALG00000032260,ENSGALG00000001094,ENSGALG00000040418,ENSGALG00000043196,ENSGALG00000005319,ENSGALG00000034950,ENSGALG00000036627,ENSGALG00000005739,ENSGALG00000013468,ENSGALG00000015464,ENSGALG00000010672,ENSGALG00000010595,ENSGALG0…
GO:0031224	intrinsic component of membrane	cellular_component	1.24e-13	1.11e-10	225	630	3264	14096	ENSGALG00000006882,Novel00696,ENSGALG00000017394,ENSGALG00000022750,ENSGALG00000028659,ENSGALG00000007867,ENSGALG00000041101,ENSGALG00000013575,ENSGALG00000004418,ENSGALG00000040553,Novel03261,ENSGALG00000008656,ENSGALG00000014455,ENSGALG00000005619,ENSGALG00000015461,ENSGALG00000016852,ENSGALG00000005259,ENSGALG00000005845,ENSGALG00000000184,Novel00074,ENSGALG00000007511,ENSGALG00000005257,ENSGA…
GO:0016020	membrane	cellular_component	8.28e-12	5.04e-09	330	630	5607	14096	ENSGALG00000013211,ENSGALG00000009388,ENSGALG00000021567,ENSGALG00000005458,ENSGALG00000007713,ENSGALG00000010707,ENSGALG00000014944,ENSGALG00000010335,ENSGALG00000011646,ENSGALG00000019555,ENSGALG00000004058,ENSGALG00000010469,ENSGALG00000000466,ENSGALG00000001462,ENSGALG00000019114,ENSGALG00000034964,ENSGALG00000039084,ENSGALG00000005095,ENSGALG00000012594,ENSGALG00000007371,ENSGALG00000001149,…
GO:0042611	MHC protein complex	cellular_component	1.46e-11	8.44e-09	10	630	13	14096	ENSGALG00000004594,ENSGALG00000041380,ENSGALG00000000158,ENSGALG00000033932,ENSGALG00000032602,ENSGALG00000000141,Novel02414,ENSGALG00000002160,ENSGALG00000038393,ENSGALG00000000162
GO:0005886	plasma membrane	cellular_component	4.92e-09	1.3e-06	153	630	2251	14096	ENSGALG00000007418,ENSGALG00000008177,ENSGALG00000016998,ENSGALG00000036093,ENSGALG00000033510,ENSGALG00000023411,ENSGALG00000003857,ENSGALG00000013741,ENSGALG00000021143,ENSGALG00000004958,ENSGALG00000005524,ENSGALG00000032701,ENSGALG00000023909,ENSGALG00000012594,ENSGALG00000030270,ENSGALG00000034970,ENSGALG00000004116,ENSGALG00000007371,ENSGALG00000009626,ENSGALG00000038393,ENSGALG00000034964,…
GO:0071944	cell periphery	cellular_component	8.54e-09	2.13e-06	157	630	2347	14096	ENSGALG00000016661,Novel00847,ENSGALG00000005619,ENSGALG00000040553,Novel03261,ENSGALG00000012454,ENSGALG00000005845,ENSGALG00000007867,ENSGALG00000004418,ENSGALG00000041043,ENSGALG00000003319,ENSGALG00000012755,ENSGALG00000008281,ENSGALG00000008427,ENSGALG00000011309,ENSGALG00000002113,ENSGALG00000038636,ENSGALG00000006635,ENSGALG00000008007,Novel03288,ENSGALG00000009945,Novel01299,ENSGALG000000…
GO:0044459	plasma membrane part	cellular_component	3.96e-08	8.66e-06	95	630	1245	14096	ENSGALG00000021567,ENSGALG00000000158,ENSGALG00000001645,ENSGALG00000010068,ENSGALG00000007906,ENSGALG00000001698,ENSGALG00000000162,ENSGALG00000002160,ENSGALG00000033520,ENSGALG00000014477,ENSGALG00000007511,ENSGALG00000015032,ENSGALG00000014561,ENSGALG00000026768,ENSGALG00000038559,ENSGALG00000008427,ENSGALG00000011309,ENSGALG00000016986,ENSGALG00000002113,ENSGALG00000038636,ENSGALG00000038393,…
GO:0042101	T cell receptor complex	cellular_component	2.53e-07	4.73e-05	7	630	12	14096	ENSGALG00000007579,ENSGALG00000015216,ENSGALG00000007418,ENSGALG00000014561,ENSGALG00000007416,ENSGALG00000014754,ENSGALG00000001486
GO:0042613	MHC class II protein complex	cellular_component	3.28e-07	6e-05	6	630	8	14096	ENSGALG00000000141,ENSGALG00000000158,ENSGALG00000004594,Novel02414,ENSGALG00000038393,ENSGALG00000000162
GO:0043235	receptor complex	cellular_component	4.1e-06	0.00055247	25	630	207	14096	ENSGALG00000004594,ENSGALG00000007579,ENSGALG00000007416,ENSGALG00000012594,ENSGALG00000002160,ENSGALG00000014206,ENSGALG00000001282,ENSGALG00000001698,ENSGALG00000032701,ENSGALG00000014561,ENSGALG00000007511,ENSGALG00000014225,ENSGALG00000014754,ENSGALG00000005259,ENSGALG00000015216,ENSGALG00000007001,ENSGALG00000033510,ENSGALG00000023881,ENSGALG00000038042,ENSGALG00000011309,ENSGALG00000007418,…
GO:0005615	extracellular space	cellular_component	4.46e-06	0.00059694	57	630	679	14096	ENSGALG00000037050,ENSGALG00000014681,ENSGALG00000009945,ENSGALG00000009626,ENSGALG00000016293,ENSGALG00000007121,ENSGALG00000011099,ENSGALG00000004960,ENSGALG00000016986,ENSGALG00000019555,ENSGALG00000011551,Novel03081,ENSGALG00000007174,ENSGALG00000001558,ENSGALG00000043603,ENSGALG00000002160,ENSGALG00000004771,ENSGALG00000034721,ENSGALG00000029583,ENSGALG00000021139,ENSGALG00000014603,ENSGALG0…
GO:0042612	MHC class I protein complex	cellular_component	2.3e-05	0.0024955	4	630	5	14096	ENSGALG00000033932,ENSGALG00000032602,ENSGALG00000041380,ENSGALG00000002160
GO:0009986	cell surface	cellular_component	8e-05	0.0069256	32	630	350	14096	ENSGALG00000009724,ENSGALG00000003863,ENSGALG00000009948,ENSGALG00000004594,ENSGALG00000030603,ENSGALG00000031997,ENSGALG00000004116,ENSGALG00000006415,ENSGALG00000015422,ENSGALG00000013372,ENSGALG00000003227,Novel01202,ENSGALG00000033520,ENSGALG00000002160,ENSGALG00000021238,ENSGALG00000035733,Novel01201,ENSGALG00000038559,ENSGALG00000007511,ENSGALG00000015032,ENSGALG00000000158,ENSGALG000000074…
GO:0009897	external side of plasma membrane	cellular_component	0.00010846	0.0087551	14	630	99	14096	ENSGALG00000004594,ENSGALG00000007001,ENSGALG00000013372,ENSGALG00000004116,ENSGALG00000006415,ENSGALG00000007416,ENSGALG00000031735,ENSGALG00000009626,ENSGALG00000002160,ENSGALG00000003863,ENSGALG00000035733,ENSGALG00000038559,ENSGALG00000015422,ENSGALG00000015032
GO:0098552	side of membrane	cellular_component	0.00012517	0.0096689	22	630	206	14096	ENSGALG00000009626,ENSGALG00000031735,ENSGALG00000036093,ENSGALG00000015422,ENSGALG00000001486,ENSGALG00000015216,ENSGALG00000007001,ENSGALG00000016661,ENSGALG00000008427,ENSGALG00000013372,ENSGALG00000035733,ENSGALG00000003863,ENSGALG00000002160,ENSGALG00000003857,ENSGALG00000000736,ENSGALG00000015032,ENSGALG00000038559,ENSGALG00000004594,ENSGALG00000016564,ENSGALG00000007416,ENSGALG00000006415,…
GO:0038023	signaling receptor activity	molecular_function	2.7e-15	5.38e-12	76	630	643	14096	ENSGALG00000012594,ENSGALG00000022750,ENSGALG00000017003,ENSGALG00000001149,ENSGALG00000004974,ENSGALG00000005524,ENSGALG00000032701,ENSGALG00000037077,ENSGALG00000013568,ENSGALG00000005619,ENSGALG00000014455,ENSGALG00000016693,ENSGALG00000011801,ENSGALG00000005259,ENSGALG00000004418,ENSGALG00000007418,ENSGALG00000017195,ENSGALG00000003103,ENSGALG00000021567,ENSGALG00000010707,ENSGALG00000007511,…
GO:0004872	receptor activity	molecular_function	6.91e-15	1.13e-11	82	630	740	14096	ENSGALG00000004974,ENSGALG00000005524,ENSGALG00000032701,ENSGALG00000037077,ENSGALG00000012594,ENSGALG00000022750,ENSGALG00000017003,ENSGALG00000001149,ENSGALG00000004418,ENSGALG00000007418,ENSGALG00000013568,ENSGALG00000005619,ENSGALG00000014455,ENSGALG00000023411,ENSGALG00000016693,ENSGALG00000005259,ENSGALG00000011801,ENSGALG00000010707,ENSGALG00000014561,ENSGALG00000007511,ENSGALG00000021362,…
GO:0004888	transmembrane signaling receptor activity	molecular_function	1.35e-14	2.02e-11	69	630	566	14096	ENSGALG00000005524,ENSGALG00000037077,ENSGALG00000012594,ENSGALG00000017003,ENSGALG00000022750,ENSGALG00000001149,ENSGALG00000004418,ENSGALG00000007418,ENSGALG00000005619,ENSGALG00000014455,ENSGALG00000016693,ENSGALG00000005259,ENSGALG00000010707,ENSGALG00000005257,ENSGALG00000021362,ENSGALG00000014561,ENSGALG00000007511,ENSGALG00000014206,ENSGALG00000001698,Novel03025,ENSGALG00000003103,ENSGALG0…
GO:0004871	signal transducer activity	molecular_function	3.45e-14	4.41e-11	85	630	805	14096	ENSGALG00000035733,ENSGALG00000005638,ENSGALG00000041491,ENSGALG00000000681,Novel01761,ENSGALG00000014858,ENSGALG00000017327,ENSGALG00000001882,ENSGALG00000020331,ENSGALG00000037166,ENSGALG00000036627,ENSGALG00000007416,ENSGALG00000001094,ENSGALG00000016564,ENSGALG00000032260,ENSGALG00000000168,ENSGALG00000016590,ENSGALG00000010595,ENSGALG00000001690,ENSGALG00000013468,ENSGALG00000015216,ENSGALG0…
GO:0060089	molecular transducer activity	molecular_function	5.31e-14	5.6e-11	91	630	902	14096	ENSGALG00000013372,ENSGALG00000015835,Novel01202,ENSGALG00000011733,Novel03000,ENSGALG00000038000,ENSGALG00000004128,ENSGALG00000002840,ENSGALG00000005543,ENSGALG00000004111,Novel01610,ENSGALG00000006527,ENSGALG00000030603,ENSGALG00000013869,ENSGALG00000004594,ENSGALG00000012119,ENSGALG00000001282,ENSGALG00000000783,ENSGALG00000003863,ENSGALG00000033960,ENSGALG00000017068,ENSGALG00000038042,ENSGA…
GO:0004896	cytokine receptor activity	molecular_function	1.96e-09	5.75e-07	16	630	56	14096	ENSGALG00000005638,ENSGALG00000035733,ENSGALG00000041491,ENSGALG00000037077,ENSGALG00000032260,ENSGALG00000036627,ENSGALG00000004594,ENSGALG00000013869,ENSGALG00000013372,ENSGALG00000016788,ENSGALG00000005619,ENSGALG00000038069,ENSGALG00000011733,ENSGALG00000038000,ENSGALG00000016693,ENSGALG00000012472
GO:0008009	chemokine activity	molecular_function	3.82e-07	6.84e-05	9	630	22	14096	ENSGALG00000032717,ENSGALG00000006346,ENSGALG00000014585,ENSGALG00000043603,ENSGALG00000024470,ENSGALG00000034478,ENSGALG00000015235,ENSGALG00000002329,ENSGALG00000011668
GO:0042379	chemokine receptor binding	molecular_function	6.09e-07	0.00010195	9	630	23	14096	ENSGALG00000015235,ENSGALG00000002329,ENSGALG00000034478,ENSGALG00000024470,ENSGALG00000011668,ENSGALG00000032717,ENSGALG00000014585,ENSGALG00000043603,ENSGALG00000006346
GO:0004930	G-protein coupled receptor activity	molecular_function	1.3e-06	0.00020283	37	630	346	14096	ENSGALG00000005524,ENSGALG00000037077,ENSGALG00000033960,ENSGALG00000000783,ENSGALG00000001149,ENSGALG00000004111,ENSGALG00000022750,Novel01610,ENSGALG00000017003,ENSGALG00000004418,ENSGALG00000002840,ENSGALG00000005543,ENSGALG00000038000,Novel03000,ENSGALG00000011733,ENSGALG00000005259,ENSGALG00000004128,ENSGALG00000014455,Novel01761,Novel03025,ENSGALG00000035733,ENSGALG00000041491,ENSGALG000000…
GO:0001637	G-protein coupled chemoattractant receptor activity	molecular_function	8.63e-06	0.0010524	7	630	18	14096	ENSGALG00000037077,ENSGALG00000041491,ENSGALG00000035733,ENSGALG00000038000,ENSGALG00000036627,ENSGALG00000011733,ENSGALG00000038069
GO:0004950	chemokine receptor activity	molecular_function	8.63e-06	0.0010524	7	630	18	14096	ENSGALG00000038000,ENSGALG00000011733,ENSGALG00000036627,ENSGALG00000037077,ENSGALG00000041491,ENSGALG00000035733,ENSGALG00000038069
GO:0003823	antigen binding	molecular_function	9e-06	0.0010892	8	630	25	14096	ENSGALG00000030270,ENSGALG00000002113,ENSGALG00000033932,ENSGALG00000000158,ENSGALG00000041380,ENSGALG00000032602,ENSGALG00000004594,ENSGALG00000043052
GO:0005125	cytokine activity	molecular_function	1.41e-05	0.0016412	17	630	109	14096	ENSGALG00000032717,ENSGALG00000007121,ENSGALG00000014585,ENSGALG00000016293,ENSGALG00000006346,ENSGALG00000015235,ENSGALG00000039458,ENSGALG00000007174,ENSGALG00000011668,ENSGALG00000006388,ENSGALG00000043603,ENSGALG00000009724,ENSGALG00000002329,ENSGALG00000006415,ENSGALG00000034478,ENSGALG00000026163,ENSGALG00000024470
GO:0035586	purinergic receptor activity	molecular_function	1.99e-05	0.0022019	7	630	20	14096	ENSGALG00000001462,ENSGALG00000017327,ENSGALG00000003863,ENSGALG00000000783,ENSGALG00000039432,ENSGALG00000000168,ENSGALG00000016227
GO:0042287	MHC protein binding	molecular_function	2.45e-05	0.002634	6	630	15	14096	ENSGALG00000035075,ENSGALG00000002113,ENSGALG00000009520,ENSGALG00000004594,Novel00070,ENSGALG00000029381
GO:0005126	cytokine receptor binding	molecular_function	5.81e-05	0.0054468	19	630	148	14096	ENSGALG00000015235,ENSGALG00000039458,ENSGALG00000007174,ENSGALG00000011668,ENSGALG00000016852,ENSGALG00000007121,ENSGALG00000032717,ENSGALG00000014585,ENSGALG00000016293,ENSGALG00000006346,ENSGALG00000002329,ENSGALG00000006415,ENSGALG00000026163,ENSGALG00000024470,ENSGALG00000034478,Novel01996,ENSGALG00000029270,ENSGALG00000043603,ENSGALG00000009724
GO:0004715	non-membrane spanning protein tyrosine kinase activity	molecular_function	7.34e-05	0.0064495	8	630	33	14096	ENSGALG00000001486,ENSGALG00000000736,ENSGALG00000000466,ENSGALG00000004958,ENSGALG00000003857,ENSGALG00000016661,ENSGALG00000016564,ENSGALG00000015216
GO:0001875	lipopolysaccharide receptor activity	molecular_function	9.35e-05	0.0078626	3	630	3	14096	ENSGALG00000007001,ENSGALG00000000783,ENSGALG00000032701
GO:0005164	tumor necrosis factor receptor binding	molecular_function	9.64e-05	0.0080351	6	630	18	14096	Novel01996,ENSGALG00000016852,ENSGALG00000006415,ENSGALG00000007121,ENSGALG00000007174,ENSGALG00000026163
GO:0048020	CCR chemokine receptor binding	molecular_function	9.78e-05	0.0080797	5	630	11	14096	ENSGALG00000032717,ENSGALG00000002329,ENSGALG00000024470,ENSGALG00000014585,ENSGALG00000043603
