# Supplementary material for: Transcriptomic profile of leg muscle during early growth and development in Haiyang yellow chicken
Source: Copernicus journal article supplement (doi:10.5194/aab-64-405-2021), 2021-09-20
Supplement: Supplementary file 5 [file Table S5.xls]

## Sheet: E12 vs E16
Table S5 All enriched KEGG pathways among the DEGs identified in the six comparisons
#Term	Database	ID	Input number	Background number	P-Value	Corrected P-Value	Input	Hyperlink
Cardiac muscle contraction	KEGG PATHWAY	gga04260	15	60	9.94219e-07	4.95899e-05	Novel02520|ENSGALG00000042581|ENSGALG00000027771|ENSGALG00000003521|ENSGALG00000003911|ENSGALG00000037744|Novel01712|ENSGALG00000040062|ENSGALG00000008593|ENSGALG00000025819|ENSGALG00000036212|Novel02798|ENSGALG00000030212|ENSGALG00000025842|ENSGALG00000029845	http://www.genome.jp/kegg-bin/show_pathway?gga04260/gga:421508%09red/gga:396468%09red/gga:772260%09red/gga:100859614%09red/gga:416978%09red/gga:417428%09red/gga:395985%09red/gga:775974%09red/gga:422365%09red/gga:396366%09red/gga:415752%09red
Calcium signaling pathway	KEGG PATHWAY	gga04020	25	162	1.02247e-06	4.95899e-05	ENSGALG00000027583|ENSGALG00000006503|ENSGALG00000008177|ENSGALG00000008424|ENSGALG00000026687|ENSGALG00000006835|ENSGALG00000034680|ENSGALG00000037744|ENSGALG00000003126|ENSGALG00000001416|Novel02798|ENSGALG00000029845|ENSGALG00000035051|ENSGALG00000006273|ENSGALG00000016518|ENSGALG00000000824|ENSGALG00000038512|ENSGALG00000008456|ENSGALG00000040062|ENSGALG00000005088|ENSGALG00000037498|ENSGALG0…	http://www.genome.jp/kegg-bin/show_pathway?gga04020/gga:428278%09red/gga:416692%09red/gga:416320%09red/gga:422546%09red/gga:421508%09red/gga:396065%09red/gga:423737%09red/gga:418612%09red/gga:396356%09red/gga:395985%09red/gga:396111%09red/gga:373890%09red/gga:396434%09red/gga:374169%09red/gga:395671%09red/gga:424214%09red/gga:427900%09red/gga:396528%09red/gga:427721%09red/gga:396378%09red
Adrenergic signaling in cardiomyocytes	KEGG PATHWAY	gga04261	18	121	5.16914e-05	0.00167136	ENSGALG00000040062|ENSGALG00000005088|ENSGALG00000027771|ENSGALG00000003521|ENSGALG00000003911|ENSGALG00000037744|ENSGALG00000008424|ENSGALG00000001416|ENSGALG00000015531|ENSGALG00000030212|ENSGALG00000008593|ENSGALG00000038512|ENSGALG00000036212|Novel02798|ENSGALG00000007409|ENSGALG00000025842|ENSGALG00000027583|ENSGALG00000029845	http://www.genome.jp/kegg-bin/show_pathway?gga04261/gga:416692%09red/gga:396468%09red/gga:422858%09red/gga:421508%09red/gga:100859614%09red/gga:423737%09red/gga:419774%09red/gga:417428%09red/gga:395985%09red/gga:396378%09red/gga:396366%09red/gga:422365%09red/gga:396065%09red/gga:373890%09red
ECM-receptor interaction	KEGG PATHWAY	gga04512	13	73	0.000117388	0.00284665	Novel00667|ENSGALG00000001343|ENSGALG00000003283|ENSGALG00000004946|ENSGALG00000008141|ENSGALG00000007917|ENSGALG00000002389|ENSGALG00000019761|ENSGALG00000006864|Novel03046|ENSGALG00000008439|ENSGALG00000003852|ENSGALG00000014615	http://www.genome.jp/kegg-bin/show_pathway?gga04512/gga:769665%09red/gga:422348%09red/gga:428268%09red/gga:417180%09red/gga:420120%09red/gga:374016%09red/gga:374058%09red/gga:424526%09red/gga:417374%09red/gga:424799%09red/gga:396076%09red/gga:417730%09red
Alanine, aspartate and glutamate metabolism	KEGG PATHWAY	gga00250	8	32	0.000350483	0.00679936	ENSGALG00000015057|ENSGALG00000029719|ENSGALG00000002944|ENSGALG00000007484|Novel02711|ENSGALG00000011618|ENSGALG00000038362|ENSGALG00000032113	http://www.genome.jp/kegg-bin/show_pathway?gga00250/gga:428994%09red/gga:422893%09red/gga:428659%09red/gga:776127%09red/gga:770953%09red/gga:396261%09red/gga:415746%09red
Biosynthesis of amino acids	KEGG PATHWAY	gga01230	10	59	0.000995771	0.0160983	ENSGALG00000002638|ENSGALG00000029719|ENSGALG00000002988|ENSGALG00000033271|ENSGALG00000007484|Novel02711|ENSGALG00000031403|ENSGALG00000019175|ENSGALG00000002479|ENSGALG00000002944	http://www.genome.jp/kegg-bin/show_pathway?gga01230/gga:428994%09red/gga:374064%09red/gga:396016%09red/gga:424381%09red/gga:396261%09red/gga:423635%09red/gga:423628%09red/gga:418544%09red/gga:415746%09red
Focal adhesion	KEGG PATHWAY	gga04510	18	184	0.00456672	0.0632818	ENSGALG00000003283|Novel00667|ENSGALG00000001343|ENSGALG00000043287|ENSGALG00000004946|ENSGALG00000008141|ENSGALG00000010290|ENSGALG00000006273|ENSGALG00000002389|ENSGALG00000019761|ENSGALG00000012155|ENSGALG00000006864|ENSGALG00000007917|Novel03046|ENSGALG00000000824|ENSGALG00000003852|ENSGALG00000014615|ENSGALG00000014463	http://www.genome.jp/kegg-bin/show_pathway?gga04510/gga:428278%09red/gga:769665%09red/gga:422348%09red/gga:395909%09red/gga:396356%09red/gga:417180%09red/gga:420120%09red/gga:428268%09red/gga:374016%09red/gga:373996%09red/gga:374058%09red/gga:424526%09red/gga:417374%09red/gga:424799%09red/gga:396263%09red/gga:408035%09red/gga:396076%09red
Tight junction	KEGG PATHWAY	gga04530	13	118	0.00622551	0.0670971	ENSGALG00000015531|ENSGALG00000039977|ENSGALG00000031744|ENSGALG00000037864|ENSGALG00000035237|ENSGALG00000006926|ENSGALG00000002845|ENSGALG00000026862|ENSGALG00000032404|ENSGALG00000014463|ENSGALG00000011889|ENSGALG00000029606|ENSGALG00000042257	http://www.genome.jp/kegg-bin/show_pathway?gga04530/gga:428245%09red/gga:374069%09red/gga:422858%09red/gga:768566%09red/gga:423648%09red/gga:417309%09red/gga:423518%09red/gga:427788%09red/gga:424149%09red/gga:396263%09red/gga:417310%09red/gga:424910%09red
Insulin signaling pathway	KEGG PATHWAY	gga04910	13	118	0.00622551	0.0670971	Novel02689|ENSGALG00000005043|Novel02883|ENSGALG00000039623|ENSGALG00000008424|ENSGALG00000010826|ENSGALG00000041047|Novel02864|ENSGALG00000016518|ENSGALG00000001828|ENSGALG00000012612|Novel02978|ENSGALG00000009435	http://www.genome.jp/kegg-bin/show_pathway?gga04910/gga:416692%09red/gga:421248%09red/gga:418201%09red/gga:395217%09red/gga:101747406%09red/gga:429110%09red/gga:430557%09red/gga:418612%09red/gga:771172%09red/gga:378909%09red/gga:419220%09red
Arginine and proline metabolism	KEGG PATHWAY	gga00330	7	50	0.0137772	0.129595	ENSGALG00000002944|ENSGALG00000007484|ENSGALG00000008177|ENSGALG00000015602|ENSGALG00000043435|ENSGALG00000023435|Novel02761	http://www.genome.jp/kegg-bin/show_pathway?gga00330/gga:428994%09red/gga:396261%09red/gga:100359387%09red/gga:396507%09red/gga:395504%09red/gga:427721%09red/gga:396508%09red
Carbon metabolism	KEGG PATHWAY	gga01200	10	90	0.0146963	0.129595	ENSGALG00000002638|Novel02711|ENSGALG00000002988|ENSGALG00000012612|ENSGALG00000033271|ENSGALG00000007484|ENSGALG00000029719|ENSGALG00000031403|ENSGALG00000007904|ENSGALG00000002944	http://www.genome.jp/kegg-bin/show_pathway?gga01200/gga:419796%09red/gga:395217%09red/gga:428994%09red/gga:374064%09red/gga:396016%09red/gga:423635%09red/gga:396261%09red/gga:424381%09red/gga:415746%09red
PPAR signaling pathway	KEGG PATHWAY	gga03320	7	59	0.0287742	0.2141	ENSGALG00000007114|ENSGALG00000005554|ENSGALG00000008439|ENSGALG00000041470|ENSGALG00000041344|ENSGALG00000037050|ENSGALG00000010628	http://www.genome.jp/kegg-bin/show_pathway?gga03320/gga:419557%09red/gga:420197%09red/gga:422547%09red/gga:396536%09red/gga:374120%09red/gga:404536%09red/gga:417730%09red
Starch and sucrose metabolism	KEGG PATHWAY	gga00500	5	35	0.0329885	0.2141	Novel02864|ENSGALG00000011016|ENSGALG00000039623|Novel02883|Novel02689	http://www.genome.jp/kegg-bin/show_pathway?gga00500/gga:421248%09red/gga:418201%09red/gga:424691%09red/gga:378909%09red
2-Oxocarboxylic acid metabolism	KEGG PATHWAY	gga01210	3	13	0.0331083	0.2141	ENSGALG00000007484|Novel02711|ENSGALG00000029719	http://www.genome.jp/kegg-bin/show_pathway?gga01210/gga:396261%09red/gga:415746%09red
Fatty acid biosynthesis	KEGG PATHWAY	gga00061	3	13	0.0331083	0.2141	Novel02978|ENSGALG00000005043|ENSGALG00000010628	http://www.genome.jp/kegg-bin/show_pathway?gga00061/gga:430557%09red/gga:422547%09red
Phenylalanine metabolism	KEGG PATHWAY	gga00360	3	15	0.0451488	0.273715	ENSGALG00000007484|ENSGALG00000013094|ENSGALG00000004343	http://www.genome.jp/kegg-bin/show_pathway?gga00360/gga:420947%09red/gga:396261%09red/gga:416852%09red
Vascular smooth muscle contraction	KEGG PATHWAY	gga04270	9	100	0.0579251	0.318214	ENSGALG00000037744|ENSGALG00000001416|ENSGALG00000008424|ENSGALG00000006273|ENSGALG00000038512|ENSGALG00000000824|Novel01117|ENSGALG00000011889|ENSGALG00000004980	http://www.genome.jp/kegg-bin/show_pathway?gga04270/gga:428278%09red/gga:416692%09red/gga:374065%09red/gga:423518%09red/gga:396356%09red/gga:395985%09red/gga:373890%09red/gga:100857499%09red/gga:396065%09red
Nitrogen metabolism	KEGG PATHWAY	gga00910	3	17	0.05905	0.318214	ENSGALG00000005360|ENSGALG00000002944|ENSGALG00000033700	http://www.genome.jp/kegg-bin/show_pathway?gga00910/gga:420208%09red/gga:417647%09red/gga:428994%09red
Tyrosine metabolism	KEGG PATHWAY	gga00350	4	31	0.0714853	0.364951	ENSGALG00000007484|ENSGALG00000008185|ENSGALG00000013094|ENSGALG00000004343	http://www.genome.jp/kegg-bin/show_pathway?gga00350/gga:420947%09red/gga:396261%09red/gga:424071%09red/gga:416852%09red
Histidine metabolism	KEGG PATHWAY	gga00340	3	21	0.0919827	0.422315	ENSGALG00000012377|ENSGALG00000043435|ENSGALG00000013094	http://www.genome.jp/kegg-bin/show_pathway?gga00340/gga:420947%09red/gga:100359387%09red/gga:424298%09red
Pentose phosphate pathway	KEGG PATHWAY	gga00030	3	21	0.0919827	0.422315	ENSGALG00000011016|ENSGALG00000012612|ENSGALG00000033271	http://www.genome.jp/kegg-bin/show_pathway?gga00030/gga:374064%09red/gga:424691%09red/gga:395217%09red
Adipocytokine signaling pathway	KEGG PATHWAY	gga04920	6	64	0.0957829	0.422315	ENSGALG00000029697|ENSGALG00000005554|ENSGALG00000008439|ENSGALG00000041470|ENSGALG00000010826|ENSGALG00000010628	http://www.genome.jp/kegg-bin/show_pathway?gga04920/gga:429110%09red/gga:422547%09red/gga:396130%09red/gga:374120%09red/gga:404536%09red/gga:417730%09red
Glycolysis / Gluconeogenesis	KEGG PATHWAY	gga00010	5	50	0.101652	0.424502	ENSGALG00000011016|ENSGALG00000007904|ENSGALG00000031403|ENSGALG00000012612|ENSGALG00000033271	http://www.genome.jp/kegg-bin/show_pathway?gga00010/gga:374064%09red/gga:424691%09red/gga:395217%09red/gga:396016%09red/gga:419796%09red
Glycine, serine and threonine metabolism	KEGG PATHWAY	gga00260	4	36	0.105031	0.424502	ENSGALG00000019175|ENSGALG00000002988|ENSGALG00000002638|ENSGALG00000023435	http://www.genome.jp/kegg-bin/show_pathway?gga00260/gga:424381%09red/gga:423635%09red/gga:418544%09red/gga:395504%09red
Adherens junction	KEGG PATHWAY	gga04520	6	68	0.116973	0.453856	ENSGALG00000010049|Novel01195|ENSGALG00000002845|ENSGALG00000006480|ENSGALG00000031960|ENSGALG00000014463	http://www.genome.jp/kegg-bin/show_pathway?gga04520/gga:395229%09red/gga:423648%09red/gga:417853%09red/gga:418415%09red/gga:396263%09red/gga:395865%09red
Notch signaling pathway	KEGG PATHWAY	gga04330	4	44	0.170406	0.626121	Novel03171|Novel00220|Novel01463|ENSGALG00000037460	http://www.genome.jp/kegg-bin/show_pathway?gga04330/gga:428441%09red
Drug metabolism - cytochrome P450	KEGG PATHWAY	gga00982	3	29	0.174281	0.626121	ENSGALG00000040573|ENSGALG00000006344|ENSGALG00000008185	http://www.genome.jp/kegg-bin/show_pathway?gga00982/gga:396322%09red/gga:395267%09red/gga:424071%09red
Fructose and mannose metabolism	KEGG PATHWAY	gga00051	3	32	0.209151	0.724558	ENSGALG00000012612|ENSGALG00000032385|ENSGALG00000033271	http://www.genome.jp/kegg-bin/show_pathway?gga00051/gga:395217%09red/gga:374064%09red/gga:415906%09red
Cysteine and methionine metabolism	KEGG PATHWAY	gga00270	3	33	0.221102	0.739548	ENSGALG00000019175|ENSGALG00000002479|ENSGALG00000007484	http://www.genome.jp/kegg-bin/show_pathway?gga00270/gga:396261%09red/gga:423628%09red/gga:418544%09red
Pyruvate metabolism	KEGG PATHWAY	gga00620	3	34	0.233186	0.753968	Novel02978|ENSGALG00000005043|ENSGALG00000007904	http://www.genome.jp/kegg-bin/show_pathway?gga00620/gga:419796%09red/gga:430557%09red
Phenylalanine, tyrosine and tryptophan biosynthesis	KEGG PATHWAY	gga00400	1	5	0.242362	0.758357	ENSGALG00000007484	http://www.genome.jp/kegg-bin/show_pathway?gga00400/gga:396261%09red
Melanogenesis	KEGG PATHWAY	gga04916	6	89	0.258842	0.784615	ENSGALG00000005088|ENSGALG00000039101|ENSGALG00000008424|ENSGALG00000006480|ENSGALG00000000839|ENSGALG00000031960	http://www.genome.jp/kegg-bin/show_pathway?gga04916/gga:416692%09red/gga:395229%09red/gga:423737%09red/gga:419147%09red/gga:395562%09red/gga:395865%09red
Vitamin B6 metabolism	KEGG PATHWAY	gga00750	1	7	0.309337	0.8199	ENSGALG00000008185	http://www.genome.jp/kegg-bin/show_pathway?gga00750/gga:424071%09red
Butanoate metabolism	KEGG PATHWAY	gga00650	2	23	0.312967	0.8199	ENSGALG00000042446|ENSGALG00000029827	http://www.genome.jp/kegg-bin/show_pathway?gga00650/gga:426992%09red/gga:426991%09red
Oxidative phosphorylation	KEGG PATHWAY	gga00190	7	115	0.313745	0.8199	Novel02520|ENSGALG00000006073|ENSGALG00000008821|ENSGALG00000042581|ENSGALG00000008084|Novel01712|ENSGALG00000025819	http://www.genome.jp/kegg-bin/show_pathway?gga00190/gga:417753%09red/gga:416571%09red/gga:416978%09red/gga:415752%09red/gga:775974%09red/gga:423179%09red/gga:772260%09red
MAPK signaling pathway	KEGG PATHWAY	gga04010	12	214	0.324467	0.8199	ENSGALG00000012594|ENSGALG00000035051|ENSGALG00000027771|ENSGALG00000003911|ENSGALG00000037744|ENSGALG00000009450|ENSGALG00000009495|ENSGALG00000035237|ENSGALG00000012155|ENSGALG00000007562|ENSGALG00000001926|ENSGALG00000008456	http://www.genome.jp/kegg-bin/show_pathway?gga04010/gga:421340%09red/gga:374169%09red/gga:427900%09red/gga:396259%09red/gga:100859614%09red/gga:417428%09red/gga:396227%09red/gga:395985%09red/gga:424149%09red/gga:408035%09red/gga:428857%09red/gga:396157%09red
Phototransduction	KEGG PATHWAY	gga04744	2	24	0.32982	0.8199	ENSGALG00000001418|ENSGALG00000008424	http://www.genome.jp/kegg-bin/show_pathway?gga04744/gga:416692%09red/gga:419864%09red
Fatty acid metabolism	KEGG PATHWAY	gga01212	3	42	0.332601	0.8199	Novel02978|ENSGALG00000005043|ENSGALG00000010628	http://www.genome.jp/kegg-bin/show_pathway?gga01212/gga:430557%09red/gga:422547%09red
Wnt signaling pathway	KEGG PATHWAY	gga04310	7	119	0.343194	0.8199	ENSGALG00000005088|ENSGALG00000039209|ENSGALG00000042153|ENSGALG00000006480|ENSGALG00000031997|ENSGALG00000000839|ENSGALG00000031960	http://www.genome.jp/kegg-bin/show_pathway?gga04310/gga:429363%09red/gga:395229%09red/gga:423737%09red/gga:420732%09red/gga:417831%09red/gga:395562%09red/gga:395865%09red
Propanoate metabolism	KEGG PATHWAY	gga00640	2	25	0.346556	0.8199	Novel02978|ENSGALG00000005043	http://www.genome.jp/kegg-bin/show_pathway?gga00640/gga:430557%09red
Nicotinate and nicotinamide metabolism	KEGG PATHWAY	gga00760	2	25	0.346556	0.8199	ENSGALG00000003816|ENSGALG00000008185	http://www.genome.jp/kegg-bin/show_pathway?gga00760/gga:424071%09red/gga:419675%09red
Ubiquinone and other terpenoid-quinone biosynthesis	KEGG PATHWAY	gga00130	1	9	0.370404	0.855458	ENSGALG00000004343	http://www.genome.jp/kegg-bin/show_pathway?gga00130/gga:416852%09red
Metabolic pathways	KEGG PATHWAY	gga01100	51	1049	0.444685	0.997027	ENSGALG00000006073|ENSGALG00000012612|ENSGALG00000033271|ENSGALG00000004343|ENSGALG00000039623|Novel01712|Novel02864|ENSGALG00000026687|ENSGALG00000036915|ENSGALG00000025819|ENSGALG00000010960|ENSGALG00000038362|Novel02978|ENSGALG00000012015|ENSGALG00000008185|ENSGALG00000011618|ENSGALG00000042581|ENSGALG00000011227|ENSGALG00000008084|ENSGALG00000015602|ENSGALG00000037951|ENSGALG00000029827|ENSGA…	http://www.genome.jp/kegg-bin/show_pathway?gga01100/gga:422686%09red/gga:416571%09red/gga:428994%09red/gga:422547%09red/gga:422893%09red/gga:396002%09red/gga:416978%09red/gga:428743%09red/gga:423635%09red/gga:396169%09red/gga:396508%09red/gga:415746%09red/gga:419796%09red/gga:419675%09red/gga:395217%09red/gga:417753%09red/gga:416852%09red/gga:776127%09red/gga:424381%09red/gga:423895%09red/gga:374…
Galactose metabolism	KEGG PATHWAY	gga00052	2	32	0.458721	0.997027	ENSGALG00000011016|ENSGALG00000033271	http://www.genome.jp/kegg-bin/show_pathway?gga00052/gga:374064%09red/gga:424691%09red
Regulation of actin cytoskeleton	KEGG PATHWAY	gga04810	9	177	0.465697	0.997027	ENSGALG00000006273|ENSGALG00000009495|ENSGALG00000002389|ENSGALG00000042153|ENSGALG00000012155|Novel03046|ENSGALG00000000824|ENSGALG00000007562|ENSGALG00000014463	http://www.genome.jp/kegg-bin/show_pathway?gga04810/gga:428278%09red/gga:429363%09red/gga:374058%09red/gga:396259%09red/gga:428857%09red/gga:396356%09red/gga:417374%09red/gga:396263%09red/gga:408035%09red
Steroid hormone biosynthesis	KEGG PATHWAY	gga00140	2	35	0.503315	0.997027	Novel02817|ENSGALG00000037951	http://www.genome.jp/kegg-bin/show_pathway?gga00140/gga:426825%09red/gga:396015%09red
Renin-angiotensin system	KEGG PATHWAY	gga04614	1	15	0.523131	0.997027	ENSGALG00000038512	http://www.genome.jp/kegg-bin/show_pathway?gga04614/gga:396065%09red
Tryptophan metabolism	KEGG PATHWAY	gga00380	2	39	0.558953	0.997027	ENSGALG00000008185|ENSGALG00000013094	http://www.genome.jp/kegg-bin/show_pathway?gga00380/gga:420947%09red/gga:424071%09red
Phagosome	KEGG PATHWAY	gga04145	6	127	0.560864	0.997027	ENSGALG00000008439|ENSGALG00000000059|ENSGALG00000003283|ENSGALG00000013056|ENSGALG00000008177|Novel03046	http://www.genome.jp/kegg-bin/show_pathway?gga04145/gga:431043%09red/gga:374058%09red/gga:427721%09red/gga:420120%09red/gga:425049%09red/gga:417730%09red
Steroid biosynthesis	KEGG PATHWAY	gga00100	1	17	0.565328	0.997027	ENSGALG00000036915	http://www.genome.jp/kegg-bin/show_pathway?gga00100/gga:420335%09red
Valine, leucine and isoleucine degradation	KEGG PATHWAY	gga00280	2	41	0.58506	0.997027	Novel02767|ENSGALG00000008185	http://www.genome.jp/kegg-bin/show_pathway?gga00280/gga:424071%09red/gga:419739%09red
Glycerophospholipid metabolism	KEGG PATHWAY	gga00564	4	86	0.585248	0.997027	ENSGALG00000000557|ENSGALG00000034741|ENSGALG00000008795|ENSGALG00000011227	http://www.genome.jp/kegg-bin/show_pathway?gga00564/gga:423895%09red/gga:428743%09red/gga:426690%09red/gga:422611%09red
Dorso-ventral axis formation	KEGG PATHWAY	gga04320	1	19	0.603799	0.997027	ENSGALG00000002645	http://www.genome.jp/kegg-bin/show_pathway?gga04320/gga:416804%09red
Cell adhesion molecules (CAMs)	KEGG PATHWAY	gga04514	5	112	0.614598	0.997027	ENSGALG00000006926|Novel01195|ENSGALG00000026862|ENSGALG00000031122|Novel03046	http://www.genome.jp/kegg-bin/show_pathway?gga04514/gga:428245%09red/gga:374058%09red/gga:424910%09red/gga:418415%09red/gga:424336%09red
Hedgehog signaling pathway	KEGG PATHWAY	gga04340	2	45	0.633799	0.997027	ENSGALG00000010133|ENSGALG00000000839	http://www.genome.jp/kegg-bin/show_pathway?gga04340/gga:374187%09red/gga:395562%09red
Glycosphingolipid biosynthesis - lacto and neolacto series	KEGG PATHWAY	gga00601	1	21	0.638872	0.997027	ENSGALG00000002477	http://www.genome.jp/kegg-bin/show_pathway?gga00601/gga:769122%09red
Peroxisome	KEGG PATHWAY	gga04146	3	74	0.682858	0.997027	ENSGALG00000015057|ENSGALG00000010628|ENSGALG00000037443	http://www.genome.jp/kegg-bin/show_pathway?gga04146/gga:417195%09red/gga:770953%09red/gga:422547%09red
Glycosaminoglycan biosynthesis - heparan sulfate / heparin	KEGG PATHWAY	gga00534	1	24	0.685758	0.997027	ENSGALG00000012015	http://www.genome.jp/kegg-bin/show_pathway?gga00534/gga:422686%09red
Phosphatidylinositol signaling system	KEGG PATHWAY	gga04070	3	75	0.691301	0.997027	ENSGALG00000026687|ENSGALG00000008424|ENSGALG00000011227	http://www.genome.jp/kegg-bin/show_pathway?gga04070/gga:416692%09red/gga:424214%09red/gga:422611%09red
Purine metabolism	KEGG PATHWAY	gga00230	6	148	0.701953	0.997027	ENSGALG00000011016|ENSGALG00000003816|ENSGALG00000029150|ENSGALG00000013941|ENSGALG00000011618|ENSGALG00000012705	http://www.genome.jp/kegg-bin/show_pathway?gga00230/gga:424691%09red/gga:420842%09red/gga:396002%09red/gga:776127%09red/gga:421692%09red/gga:419675%09red
GnRH signaling pathway	KEGG PATHWAY	gga04912	3	77	0.707678	0.997027	ENSGALG00000037744|ENSGALG00000005088|ENSGALG00000008424	http://www.genome.jp/kegg-bin/show_pathway?gga04912/gga:416692%09red/gga:395985%09red/gga:423737%09red
ErbB signaling pathway	KEGG PATHWAY	gga04012	3	77	0.707678	0.997027	ENSGALG00000003126|ENSGALG00000012155|ENSGALG00000005088	http://www.genome.jp/kegg-bin/show_pathway?gga04012/gga:395671%09red/gga:408035%09red/gga:423737%09red
mTOR signaling pathway	KEGG PATHWAY	gga04150	2	52	0.708144	0.997027	ENSGALG00000010290|ENSGALG00000010826	http://www.genome.jp/kegg-bin/show_pathway?gga04150/gga:395909%09red/gga:429110%09red
beta-Alanine metabolism	KEGG PATHWAY	gga00410	1	26	0.713589	0.997027	ENSGALG00000043435	http://www.genome.jp/kegg-bin/show_pathway?gga00410/gga:100359387%09red
Mucin type O-Glycan biosynthesis	KEGG PATHWAY	gga00512	1	26	0.713589	0.997027	ENSGALG00000010960	http://www.genome.jp/kegg-bin/show_pathway?gga00512/gga:424177%09red
Gap junction	KEGG PATHWAY	gga04540	3	80	0.730983	0.997027	ENSGALG00000013056|ENSGALG00000012155|ENSGALG00000000059	http://www.genome.jp/kegg-bin/show_pathway?gga04540/gga:408035%09red/gga:425049%09red/gga:431043%09red
Citrate cycle (TCA cycle)	KEGG PATHWAY	gga00020	1	28	0.73896	0.997027	ENSGALG00000007904	http://www.genome.jp/kegg-bin/show_pathway?gga00020/gga:419796%09red
VEGF signaling pathway	KEGG PATHWAY	gga04370	2	56	0.744691	0.997027	ENSGALG00000010290|ENSGALG00000001926	http://www.genome.jp/kegg-bin/show_pathway?gga04370/gga:396227%09red/gga:395909%09red
Other types of O-glycan biosynthesis	KEGG PATHWAY	gga00514	1	29	0.750792	0.997027	ENSGALG00000005550	http://www.genome.jp/kegg-bin/show_pathway?gga00514/gga:396169%09red
Regulation of autophagy	KEGG PATHWAY	gga04140	1	31	0.772875	0.997027	ENSGALG00000010826	http://www.genome.jp/kegg-bin/show_pathway?gga04140/gga:429110%09red
Retinol metabolism	KEGG PATHWAY	gga00830	1	31	0.772875	0.997027	ENSGALG00000008185	http://www.genome.jp/kegg-bin/show_pathway?gga00830/gga:424071%09red
Metabolism of xenobiotics by cytochrome P450	KEGG PATHWAY	gga00980	1	32	0.783172	0.997027	ENSGALG00000006344	http://www.genome.jp/kegg-bin/show_pathway?gga00980/gga:396322%09red
Oocyte meiosis	KEGG PATHWAY	gga04114	3	88	0.785991	0.997027	ENSGALG00000005088|ENSGALG00000030879|ENSGALG00000008424	http://www.genome.jp/kegg-bin/show_pathway?gga04114/gga:416692%09red/gga:423737%09red/gga:422165%09red
Fatty acid degradation	KEGG PATHWAY	gga00071	1	33	0.793004	0.997027	ENSGALG00000010628	http://www.genome.jp/kegg-bin/show_pathway?gga00071/gga:422547%09red
Pyrimidine metabolism	KEGG PATHWAY	gga00240	3	90	0.798196	0.997027	ENSGALG00000003816|ENSGALG00000038362|ENSGALG00000037671	http://www.genome.jp/kegg-bin/show_pathway?gga00240/gga:428659%09red/gga:419675%09red/gga:418114%09red
RNA degradation	KEGG PATHWAY	gga03018	2	63	0.79923	0.997027	ENSGALG00000031403|ENSGALG00000003800	http://www.genome.jp/kegg-bin/show_pathway?gga03018/gga:419674%09red/gga:396016%09red
Glutathione metabolism	KEGG PATHWAY	gga00480	1	36	0.81991	0.997027	ENSGALG00000006344	http://www.genome.jp/kegg-bin/show_pathway?gga00480/gga:396322%09red
ABC transporters	KEGG PATHWAY	gga02010	1	37	0.828079	0.997027	ENSGALG00000003553	http://www.genome.jp/kegg-bin/show_pathway?gga02010/gga:424011%09red
Nucleotide excision repair	KEGG PATHWAY	gga03420	1	37	0.828079	0.997027	Novel01973	http://www.genome.jp/kegg-bin/show_pathway?gga03420/gga:427153%09red
TGF-beta signaling pathway	KEGG PATHWAY	gga04350	2	69	0.837499	0.997027	ENSGALG00000040575|ENSGALG00000036346	http://www.genome.jp/kegg-bin/show_pathway?gga04350/gga:395887%09red/gga:428655%09red
mRNA surveillance pathway	KEGG PATHWAY	gga03015	2	69	0.837499	0.997027	ENSGALG00000015531|ENSGALG00000003800	http://www.genome.jp/kegg-bin/show_pathway?gga03015/gga:419674%09red/gga:422858%09red
Ether lipid metabolism	KEGG PATHWAY	gga00565	1	39	0.843325	0.997027	ENSGALG00000010645	http://www.genome.jp/kegg-bin/show_pathway?gga00565/gga:422551%09red
Neuroactive ligand-receptor interaction	KEGG PATHWAY	gga04080	9	261	0.86716	0.997027	ENSGALG00000005258|ENSGALG00000007269|Novel02693|ENSGALG00000001416|ENSGALG00000038512|ENSGALG00000001698|ENSGALG00000006575|ENSGALG00000009405|ENSGALG00000010357	http://www.genome.jp/kegg-bin/show_pathway?gga04080/gga:396275%09red/gga:420453%09red/gga:396345%09red/gga:422289%09red/gga:414894%09red/gga:396065%09red/gga:427667%09red/gga:374214%09red/gga:373890%09red
Amino sugar and nucleotide sugar metabolism	KEGG PATHWAY	gga00520	1	44	0.875795	0.997027	ENSGALG00000011016	http://www.genome.jp/kegg-bin/show_pathway?gga00520/gga:424691%09red
N-Glycan biosynthesis	KEGG PATHWAY	gga00510	1	46	0.886817	0.997027	ENSGALG00000005550	http://www.genome.jp/kegg-bin/show_pathway?gga00510/gga:396169%09red
Glycerolipid metabolism	KEGG PATHWAY	gga00561	1	50	0.906019	0.997027	ENSGALG00000008795	http://www.genome.jp/kegg-bin/show_pathway?gga00561/gga:423895%09red
Inositol phosphate metabolism	KEGG PATHWAY	gga00562	1	57	0.932133	0.997027	ENSGALG00000026687	http://www.genome.jp/kegg-bin/show_pathway?gga00562/gga:424214%09red
p53 signaling pathway	KEGG PATHWAY	gga04115	1	61	0.943659	0.997027	ENSGALG00000028115	http://www.genome.jp/kegg-bin/show_pathway?gga04115/gga:408037%09red
Influenza A	KEGG PATHWAY	gga05164	3	130	0.943673	0.997027	Novel02693|ENSGALG00000016144|ENSGALG00000006503	http://www.genome.jp/kegg-bin/show_pathway?gga05164/gga:416320%09red/gga:396345%09red/gga:418528%09red
Cytokine-cytokine receptor interaction	KEGG PATHWAY	gga04060	4	165	0.951098	0.997027	ENSGALG00000012155|ENSGALG00000038000|ENSGALG00000010290|ENSGALG00000036346	http://www.genome.jp/kegg-bin/show_pathway?gga04060/gga:408035%09red/gga:420719%09red/gga:395909%09red/gga:395887%09red
FoxO signaling pathway	KEGG PATHWAY	gga04068	2	121	0.977477	0.997027	ENSGALG00000012155|ENSGALG00000010826	http://www.genome.jp/kegg-bin/show_pathway?gga04068/gga:408035%09red/gga:429110%09red
Endocytosis	KEGG PATHWAY	gga04144	4	192	0.979584	0.997027	ENSGALG00000003126|ENSGALG00000012155|ENSGALG00000009495|ENSGALG00000043287	http://www.genome.jp/kegg-bin/show_pathway?gga04144/gga:395671%09red/gga:408035%09red/gga:396259%09red/gga:373996%09red
RNA transport	KEGG PATHWAY	gga03013	2	129	0.983645	0.997027	ENSGALG00000005843|ENSGALG00000003800	http://www.genome.jp/kegg-bin/show_pathway?gga03013/gga:419674%09red/gga:419244%09red
Lysosome	KEGG PATHWAY	gga04142	1	107	0.993411	0.997027	ENSGALG00000005171	http://www.genome.jp/kegg-bin/show_pathway?gga04142/gga:424807%09red
Cell cycle	KEGG PATHWAY	gga04110	1	110	0.994274	0.997027	ENSGALG00000028115	http://www.genome.jp/kegg-bin/show_pathway?gga04110/gga:408037%09red
Ribosome	KEGG PATHWAY	gga03010	1	120	0.996414	0.997027	ENSGALG00000005458	http://www.genome.jp/kegg-bin/show_pathway?gga03010/gga:416542%09red
Ubiquitin mediated proteolysis	KEGG PATHWAY	gga04120	1	124	0.997027	0.997027	Novel01973	http://www.genome.jp/kegg-bin/show_pathway?gga04120/gga:427153%09red

## Sheet: E12 vs 1d
#Term	Database	ID	Input number	Background number	P-Value	Corrected P-Value	Input	Hyperlink
Oxidative phosphorylation	KEGG PATHWAY	gga00190	77	115	7.33132e-21	1.01905e-18	ENSGALG00000014121|ENSGALG00000008613|ENSGALG00000013167|ENSGALG00000035144|ENSGALG00000028302|ENSGALG00000002033|ENSGALG00000032142|ENSGALG00000022813|ENSGALG00000009076|ENSGALG00000015751|ENSGALG00000001330|ENSGALG00000008239|ENSGALG00000009703|ENSGALG00000015372|ENSGALG00000025819|ENSGALG00000041812|ENSGALG00000003256|ENSGALG00000001375|ENSGALG00000013191|ENSGALG00000032595|ENSGALG00000037838|…	http://www.genome.jp/kegg-bin/show_pathway?gga00190/gga:420976%09red/gga:374159%09red/gga:427009%09red/gga:416978%09red/gga:419992%09red/gga:772135%09red/gga:807639%09red/gga:807638%09red/gga:424102%09red/gga:770724%09red/gga:395758%09red/gga:430210%09red/gga:772260%09red/gga:769954%09red/gga:807637%09red/gga:807636%09red/gga:420243%09red/gga:423415%09red/gga:771939%09red/gga:416013%09red/gga:772…
Cardiac muscle contraction	KEGG PATHWAY	gga04260	38	60	1.89816e-10	1.31922e-08	ENSGALG00000014121|ENSGALG00000015358|ENSGALG00000035144|ENSGALG00000027771|ENSGALG00000032142|ENSGALG00000025819|ENSGALG00000042581|ENSGALG00000037744|ENSGALG00000038087|ENSGALG00000040757|ENSGALG00000032456|ENSGALG00000002490|ENSGALG00000040062|ENSGALG00000030212|Novel02520|ENSGALG00000032079|ENSGALG00000008066|ENSGALG00000029319|ENSGALG00000005400|ENSGALG00000007205|ENSGALG00000001096|ENSGALG0…	http://www.genome.jp/kegg-bin/show_pathway?gga04260/gga:396472%09red/gga:416978%09red/gga:807639%09red/gga:415826%09red/gga:807637%09red/gga:772260%09red/gga:420243%09red/gga:771939%09red/gga:416013%09red/gga:395985%09red/gga:807635%09red/gga:770135%09red/gga:396467%09red/gga:395534%09red/gga:396468%09red/gga:100858114%09red/gga:770937%09red/gga:417428%09red/gga:396366%09red/gga:775974%09red/gga:…
Carbon metabolism	KEGG PATHWAY	gga01200	41	90	5.67632e-08	2.63003e-06	ENSGALG00000013167|ENSGALG00000012612|ENSGALG00000033271|ENSGALG00000031403|ENSGALG00000007606|ENSGALG00000014442|ENSGALG00000002988|ENSGALG00000031364|ENSGALG00000011950|ENSGALG00000017246|ENSGALG00000007936|ENSGALG00000016993|ENSGALG00000029576|ENSGALG00000011659|ENSGALG00000008858|ENSGALG00000007878|ENSGALG00000037401|ENSGALG00000001949|Novel02501|ENSGALG00000031678|ENSGALG00000001992|ENSGALG0…	http://www.genome.jp/kegg-bin/show_pathway?gga01200/gga:421587%09red/gga:396456%09red/gga:422932%09red/gga:396533%09red/gga:417699%09red/gga:417517%09red/gga:374222%09red/gga:426429%09red/gga:423635%09red/gga:395758%09red/gga:396435%09red/gga:418857%09red/gga:424381%09red/gga:415746%09red/gga:419796%09red/gga:395492%09red/gga:419793%09red/gga:416520%09red/gga:100858903%09red/gga:419019%09red/gga:…
ECM-receptor interaction	KEGG PATHWAY	gga04512	33	73	1.25933e-06	4.37618e-05	Novel00667|ENSGALG00000029182|ENSGALG00000009641|ENSGALG00000003852|ENSGALG00000006958|ENSGALG00000033420|Novel02884|ENSGALG00000041915|ENSGALG00000010875|ENSGALG00000030250|ENSGALG00000042009|ENSGALG00000041555|ENSGALG00000014804|ENSGALG00000005180|ENSGALG00000019761|ENSGALG00000014615|ENSGALG00000043377|ENSGALG00000043143|ENSGALG00000032023|ENSGALG00000008439|ENSGALG00000011200|ENSGALG000000068…	http://www.genome.jp/kegg-bin/show_pathway?gga04512/gga:396306%09red/gga:396478%09red/gga:374058%09red/gga:396243%09red/gga:374016%09red/gga:424435%09red/gga:419031%09red/gga:417730%09red/gga:417180%09red/gga:395470%09red/gga:428448%09red/gga:414837%09red/gga:374046%09red/gga:769665%09red/gga:424526%09red/gga:395210%09red/gga:396071%09red/gga:396076%09red/gga:416163%09red/gga:417231%09red/gga:415…
Metabolic pathways	KEGG PATHWAY	gga01100	219	1049	7.86512e-06	0.00021865	ENSGALG00000041461|ENSGALG00000034655|ENSGALG00000035144|ENSGALG00000022813|ENSGALG00000008177|ENSGALG00000015219|ENSGALG00000009076|ENSGALG00000007606|ENSGALG00000003972|ENSGALG00000041812|ENSGALG00000009519|ENSGALG00000023517|ENSGALG00000016442|ENSGALG00000011950|ENSGALG00000041091|ENSGALG00000007931|ENSGALG00000007936|ENSGALG00000008239|ENSGALG00000011659|ENSGALG00000011325|ENSGALG00000037401|…	http://www.genome.jp/kegg-bin/show_pathway?gga01100/gga:396456%09red/gga:420976%09red/gga:422893%09red/gga:416978%09red/gga:374033%09red/gga:422611%09red/gga:417202%09red/gga:418857%09red/gga:416543%09red/gga:417163%09red/gga:373971%09red/gga:427495%09red/gga:419675%09red/gga:807642%09red/gga:395719%09red/gga:776127%09red/gga:100857596%09red/gga:100859320%09red/gga:423895%09red/gga:419077%09red/g…
Citrate cycle (TCA cycle)	KEGG PATHWAY	gga00020	18	28	1.00825e-05	0.000233577	ENSGALG00000007878|ENSGALG00000010286|ENSGALG00000015961|ENSGALG00000016993|ENSGALG00000011950|ENSGALG00000013167|ENSGALG00000007931|ENSGALG00000016430|ENSGALG00000007904|ENSGALG00000029576|ENSGALG00000008858|ENSGALG00000014155|ENSGALG00000033888|ENSGALG00000037401|ENSGALG00000001949|ENSGALG00000032157|ENSGALG00000030466|ENSGALG00000029663	http://www.genome.jp/kegg-bin/show_pathway?gga00020/gga:423357%09red/gga:374009%09red/gga:419793%09red/gga:416066%09red/gga:100858903%09red/gga:422932%09red/gga:417699%09red/gga:419796%09red/gga:417517%09red/gga:418610%09red/gga:421281%09red/gga:426429%09red/gga:395758%09red/gga:415362%09red/gga:426573%09red/gga:418857%09red
Biosynthesis of amino acids	KEGG PATHWAY	gga01230	25	59	5.55199e-05	0.00110247	ENSGALG00000034655|ENSGALG00000033271|ENSGALG00000031403|ENSGALG00000007606|ENSGALG00000014442|ENSGALG00000002988|ENSGALG00000041352|ENSGALG00000011950|ENSGALG00000007936|ENSGALG00000009519|ENSGALG00000019175|Novel02501|ENSGALG00000030466|ENSGALG00000001992|ENSGALG00000007484|Novel02711|ENSGALG00000031678|ENSGALG00000037401|ENSGALG00000033888|ENSGALG00000002638|ENSGALG00000014526|ENSGALG000000313…	http://www.genome.jp/kegg-bin/show_pathway?gga01230/gga:423976%09red/gga:428969%09red/gga:374009%09red/gga:395492%09red/gga:416520%09red/gga:100858903%09red/gga:396533%09red/gga:374064%09red/gga:374193%09red/gga:395833%09red/gga:396016%09red/gga:424381%09red/gga:396261%09red/gga:423272%09red/gga:423635%09red/gga:396435%09red/gga:415362%09red/gga:426573%09red/gga:396456%09red/gga:418544%09red/gga:…
Calcium signaling pathway	KEGG PATHWAY	gga04020	46	162	0.00026379	0.00458336	ENSGALG00000004809|ENSGALG00000037557|ENSGALG00000027583|ENSGALG00000006503|ENSGALG00000008177|ENSGALG00000008424|Novel02909|ENSGALG00000004240|ENSGALG00000026687|ENSGALG00000005002|ENSGALG00000040035|ENSGALG00000006835|ENSGALG00000034680|ENSGALG00000037744|ENSGALG00000003126|ENSGALG00000001416|ENSGALG00000030251|Novel02797|ENSGALG00000004004|ENSGALG00000012845|Novel02798|ENSGALG00000040062|ENSGA…	http://www.genome.jp/kegg-bin/show_pathway?gga04020/gga:396434%09red/gga:422546%09red/gga:423737%09red/gga:723973%09red/gga:416845%09red/gga:424412%09red/gga:415741%09red/gga:396065%09red/gga:395581%09red/gga:416526%09red/gga:395776%09red/gga:395498%09red/gga:427552%09red/gga:420893%09red/gga:396356%09red/gga:395985%09red/gga:373890%09red/gga:395671%09red/gga:424214%09red/gga:420328%09red/gga:396…
2-Oxocarboxylic acid metabolism	KEGG PATHWAY	gga01210	9	13	0.00120092	0.0167542	ENSGALG00000029719|ENSGALG00000011950|ENSGALG00000029663|ENSGALG00000007484|Novel02711|ENSGALG00000002321|ENSGALG00000037401|ENSGALG00000033888|ENSGALG00000030466	http://www.genome.jp/kegg-bin/show_pathway?gga01210/gga:374009%09red/gga:100858903%09red/gga:396533%09red/gga:415362%09red/gga:396261%09red/gga:426573%09red/gga:415746%09red
Pyruvate metabolism	KEGG PATHWAY	gga00620	15	34	0.00120534	0.0167542	ENSGALG00000027632|ENSGALG00000006300|ENSGALG00000017246|ENSGALG00000001992|ENSGALG00000038427|ENSGALG00000007931|ENSGALG00000016430|ENSGALG00000029576|ENSGALG00000011659|ENSGALG00000005043|ENSGALG00000001949|ENSGALG00000007904|ENSGALG00000008858|Novel02978|ENSGALG00000036165	http://www.genome.jp/kegg-bin/show_pathway?gga00620/gga:419796%09red/gga:421217%09red/gga:396221%09red/gga:396456%09red/gga:416066%09red/gga:417699%09red/gga:430557%09red/gga:417517%09red/gga:418610%09red/gga:421281%09red/gga:421587%09red/gga:419019%09red
Propanoate metabolism	KEGG PATHWAY	gga00640	11	25	0.00536653	0.0625215	ENSGALG00000006300|ENSGALG00000005043|ENSGALG00000043307|ENSGALG00000038427|ENSGALG00000015961|ENSGALG00000016993|ENSGALG00000032157|ENSGALG00000011659|ENSGALG00000016536|ENSGALG00000036165|Novel02978	http://www.genome.jp/kegg-bin/show_pathway?gga00640/gga:396221%09red/gga:422932%09red/gga:395929%09red/gga:430557%09red/gga:423979%09red/gga:421587%09red/gga:418857%09red
Glycolysis / Gluconeogenesis	KEGG PATHWAY	gga00010	17	50	0.00539754	0.0625215	ENSGALG00000011016|ENSGALG00000006300|ENSGALG00000014526|ENSGALG00000012612|ENSGALG00000041352|ENSGALG00000033271|ENSGALG00000001992|ENSGALG00000031403|ENSGALG00000007931|ENSGALG00000007936|ENSGALG00000016430|ENSGALG00000029576|ENSGALG00000007606|ENSGALG00000007904|ENSGALG00000014442|Novel02501|ENSGALG00000031678	http://www.genome.jp/kegg-bin/show_pathway?gga00010/gga:419796%09red/gga:395492%09red/gga:395217%09red/gga:416066%09red/gga:396456%09red/gga:428969%09red/gga:417699%09red/gga:374193%09red/gga:395833%09red/gga:418610%09red/gga:396016%09red/gga:424691%09red/gga:396221%09red/gga:396435%09red/gga:374064%09red
DNA replication	KEGG PATHWAY	gga03030	12	30	0.00673313	0.0719927	ENSGALG00000006037|ENSGALG00000039384|Novel03083|ENSGALG00000012546|ENSGALG00000016676|ENSGALG00000016278|ENSGALG00000004037|ENSGALG00000012348|Novel02961|ENSGALG00000017064|ENSGALG00000033781|ENSGALG00000007665	http://www.genome.jp/kegg-bin/show_pathway?gga03030/gga:416027%09red/gga:423688%09red/gga:769677%09red/gga:422043%09red/gga:418058%09red/gga:418907%09red/gga:416997%09red/gga:424295%09red/gga:421878%09red/gga:430516%09red
Alanine, aspartate and glutamate metabolism	KEGG PATHWAY	gga00250	12	32	0.00999678	0.0992538	ENSGALG00000015057|ENSGALG00000029719|ENSGALG00000011618|ENSGALG00000016524|ENSGALG00000007484|Novel02711|ENSGALG00000040184|ENSGALG00000002321|ENSGALG00000009748|ENSGALG00000038362|ENSGALG00000032113|ENSGALG00000032544	http://www.genome.jp/kegg-bin/show_pathway?gga00250/gga:418255%09red/gga:396533%09red/gga:422893%09red/gga:428659%09red/gga:776127%09red/gga:770953%09red/gga:396261%09red/gga:420818%09red/gga:415746%09red/gga:420574%09red
Focal adhesion	KEGG PATHWAY	gga04510	40	184	0.0286193	0.265205	ENSGALG00000041555|ENSGALG00000029182|Novel00667|ENSGALG00000003852|ENSGALG00000014615|ENSGALG00000014463|ENSGALG00000008262|Novel02884|ENSGALG00000041915|ENSGALG00000010875|ENSGALG00000043287|ENSGALG00000010290|ENSGALG00000014804|ENSGALG00000005180|ENSGALG00000019761|ENSGALG00000012155|ENSGALG00000017179|ENSGALG00000011200|ENSGALG00000012845|ENSGALG00000033420|ENSGALG00000043143|ENSGALG000000320…	http://www.genome.jp/kegg-bin/show_pathway?gga04510/gga:396306%09red/gga:396478%09red/gga:374058%09red/gga:424435%09red/gga:396243%09red/gga:419031%09red/gga:374016%09red/gga:415578%09red/gga:408035%09red/gga:416734%09red/gga:420893%09red/gga:417772%09red/gga:417180%09red/gga:373996%09red/gga:395470%09red/gga:396356%09red/gga:428448%09red/gga:414837%09red/gga:374046%09red/gga:769665%09red/gga:395…
Cell cycle	KEGG PATHWAY	gga04110	26	110	0.0328761	0.266945	ENSGALG00000003085|ENSGALG00000028115|ENSGALG00000040794|Novel02961|ENSGALG00000025810|ENSGALG00000011967|ENSGALG00000006037|ENSGALG00000041923|ENSGALG00000006051|ENSGALG00000036519|ENSGALG00000032699|ENSGALG00000001616|ENSGALG00000010623|ENSGALG00000004161|ENSGALG00000005769|ENSGALG00000009971|ENSGALG00000012546|ENSGALG00000042418|ENSGALG00000016676|ENSGALG00000006110|ENSGALG00000008233|ENSGALG0…	http://www.genome.jp/kegg-bin/show_pathway?gga04110/gga:418058%09red/gga:374260%09red/gga:396142%09red/gga:100857489%09red/gga:424640%09red/gga:416158%09red/gga:423045%09red/gga:421849%09red/gga:396167%09red/gga:422043%09red/gga:396252%09red/gga:424563%09red/gga:416776%09red/gga:416575%09red/gga:424507%09red/gga:415400%09red/gga:421226%09red/gga:416027%09red/gga:420231%09red/gga:408037%09red/gga:…
Adrenergic signaling in cardiomyocytes	KEGG PATHWAY	gga04261	28	121	0.0337863	0.266945	ENSGALG00000015358|ENSGALG00000027771|ENSGALG00000027583|ENSGALG00000008424|ENSGALG00000038512|ENSGALG00000040035|ENSGALG00000040757|ENSGALG00000037744|ENSGALG00000038087|ENSGALG00000001416|ENSGALG00000007409|ENSGALG00000030251|ENSGALG00000037138|Novel02798|ENSGALG00000040062|ENSGALG00000030212|ENSGALG00000005400|ENSGALG00000040023|ENSGALG00000007082|ENSGALG00000005088|ENSGALG00000025842|ENSGALG0…	http://www.genome.jp/kegg-bin/show_pathway?gga04261/gga:423737%09red/gga:396472%09red/gga:417739%09red/gga:396065%09red/gga:395985%09red/gga:373890%09red/gga:420328%09red/gga:396378%09red/gga:396468%09red/gga:421508%09red/gga:396467%09red/gga:419774%09red/gga:417428%09red/gga:396366%09red/gga:422365%09red/gga:395534%09red/gga:416692%09red/gga:395378%09red/gga:415996%09red/gga:427623%09red/gga:395…
Starch and sucrose metabolism	KEGG PATHWAY	gga00500	11	35	0.0345684	0.266945	ENSGALG00000011016|Novel02689|Novel02883|ENSGALG00000038224|ENSGALG00000042771|ENSGALG00000039623|Novel02864|ENSGALG00000009036|ENSGALG00000005147|ENSGALG00000038740|ENSGALG00000008855	http://www.genome.jp/kegg-bin/show_pathway?gga00500/gga:421248%09red/gga:418201%09red/gga:414139%09red/gga:378909%09red/gga:414140%09red/gga:424691%09red/gga:373900%09red/gga:427964%09red/gga:423232%09red
Valine, leucine and isoleucine degradation	KEGG PATHWAY	gga00280	12	41	0.0413646	0.302615	ENSGALG00000016555|ENSGALG00000033207|ENSGALG00000043307|ENSGALG00000040702|ENSGALG00000031142|ENSGALG00000007931|ENSGALG00000036622|ENSGALG00000011659|ENSGALG00000008185|Novel02767|ENSGALG00000016536|ENSGALG00000020876	http://www.genome.jp/kegg-bin/show_pathway?gga00280/gga:424071%09red/gga:426847%09red/gga:395375%09red/gga:427395%09red/gga:419739%09red/gga:423979%09red/gga:421587%09red/gga:417699%09red/gga:424072%09red/gga:420632%09red/gga:421995%09red/gga:395929%09red
Oocyte meiosis	KEGG PATHWAY	gga04114	21	88	0.0477008	0.33152	ENSGALG00000003085|ENSGALG00000030879|ENSGALG00000005088|Novel02858|ENSGALG00000040794|ENSGALG00000009971|Novel02824|ENSGALG00000001506|ENSGALG00000011967|ENSGALG00000008424|ENSGALG00000011281|ENSGALG00000002150|ENSGALG00000030251|Novel02779|ENSGALG00000032699|ENSGALG00000007768|ENSGALG00000006110|ENSGALG00000004161|ENSGALG00000008233|ENSGALG00000041413|ENSGALG00000041923	http://www.genome.jp/kegg-bin/show_pathway?gga04114/gga:396252%09red/gga:416692%09red/gga:100529062%09red/gga:423737%09red/gga:420231%09red/gga:422165%09red/gga:378890%09red/gga:420650%09red/gga:428167%09red/gga:416575%09red/gga:415326%09red/gga:424563%09red/gga:421226%09red/gga:425536%09red/gga:415400%09red/gga:416158%09red/gga:422675%09red/gga:420328%09red
Fatty acid biosynthesis	KEGG PATHWAY	gga00061	5	13	0.0790882	0.523489	ENSGALG00000038427|Novel02978|ENSGALG00000005043|ENSGALG00000036165|ENSGALG00000010628	http://www.genome.jp/kegg-bin/show_pathway?gga00061/gga:430557%09red/gga:422547%09red
Insulin signaling pathway	KEGG PATHWAY	gga04910	24	118	0.122835	0.776091	ENSGALG00000038427|ENSGALG00000004801|ENSGALG00000039623|ENSGALG00000008424|Novel02864|ENSGALG00000006670|ENSGALG00000010053|Novel02883|ENSGALG00000010440|ENSGALG00000004004|Novel02689|ENSGALG00000012612|ENSGALG00000001828|ENSGALG00000041047|Novel02978|ENSGALG00000009435|ENSGALG00000005043|ENSGALG00000026287|ENSGALG00000002485|ENSGALG00000038224|ENSGALG00000027786|ENSGALG00000010826|ENSGALG000000…	http://www.genome.jp/kegg-bin/show_pathway?gga04910/gga:416692%09red/gga:421248%09red/gga:417543%09red/gga:395217%09red/gga:101747406%09red/gga:429110%09red/gga:424568%09red/gga:422181%09red/gga:430557%09red/gga:418201%09red/gga:395299%09red/gga:419220%09red/gga:771961%09red/gga:428017%09red/gga:771172%09red/gga:378909%09red/gga:415741%09red/gga:427017%09red/gga:425328%09red
Glycine, serine and threonine metabolism	KEGG PATHWAY	gga00260	9	36	0.133028	0.803954	ENSGALG00000002638|ENSGALG00000002988|ENSGALG00000015053|ENSGALG00000031364|ENSGALG00000007931|ENSGALG00000007606|ENSGALG00000002855|ENSGALG00000019175|ENSGALG00000005363	http://www.genome.jp/kegg-bin/show_pathway?gga00260/gga:428969%09red/gga:417146%09red/gga:416520%09red/gga:417699%09red/gga:415993%09red/gga:424381%09red/gga:374222%09red/gga:423635%09red/gga:418544%09red
Fatty acid metabolism	KEGG PATHWAY	gga01212	10	42	0.142578	0.80887	ENSGALG00000005043|ENSGALG00000038427|ENSGALG00000031142|ENSGALG00000011659|ENSGALG00000016555|ENSGALG00000002891|Novel02978|ENSGALG00000036165|ENSGALG00000016536|ENSGALG00000010628	http://www.genome.jp/kegg-bin/show_pathway?gga01212/gga:426847%09red/gga:422547%09red/gga:424005%09red/gga:430557%09red/gga:421587%09red/gga:421995%09red/gga:395929%09red
Fanconi anemia pathway	KEGG PATHWAY	gga03460	11	48	0.15042	0.80887	ENSGALG00000030313|ENSGALG00000030022|ENSGALG00000003660|ENSGALG00000003720|ENSGALG00000034534|ENSGALG00000002781|ENSGALG00000006658|ENSGALG00000000516|ENSGALG00000000102|ENSGALG00000007676|ENSGALG00000024481	http://www.genome.jp/kegg-bin/show_pathway?gga03460/gga:101750641%09red/gga:415854%09red/gga:415770%09red/gga:415491%09red/gga:373983%09red/gga:415935%09red/gga:771417%09red/gga:396086%09red/gga:422104%09red/gga:421149%09red/gga:421202%09red
Fructose and mannose metabolism	KEGG PATHWAY	gga00051	8	32	0.151299	0.80887	ENSGALG00000014526|ENSGALG00000041352|ENSGALG00000033271|ENSGALG00000032385|ENSGALG00000012612|Novel02501|ENSGALG00000026776|ENSGALG00000031678	http://www.genome.jp/kegg-bin/show_pathway?gga00051/gga:395492%09red/gga:395217%09red/gga:374064%09red/gga:419040%09red/gga:415906%09red/gga:396435%09red
Notch signaling pathway	KEGG PATHWAY	gga04330	10	44	0.170346	0.849809	Novel00762|Novel00777|Novel01598|ENSGALG00000011278|Novel00961|ENSGALG00000037460|ENSGALG00000001141|Novel02114|Novel00197|ENSGALG00000003952	http://www.genome.jp/kegg-bin/show_pathway?gga04330/gga:419392%09red/gga:428441%09red/gga:419185%09red
Arginine and proline metabolism	KEGG PATHWAY	gga00330	11	50	0.177151	0.849809	ENSGALG00000042030|ENSGALG00000007484|ENSGALG00000008177|ENSGALG00000015602|Novel02909|ENSGALG00000009519|ENSGALG00000002321|ENSGALG00000043435|Novel00898|ENSGALG00000034655|Novel02761	http://www.genome.jp/kegg-bin/show_pathway?gga00330/gga:396508%09red/gga:423976%09red/gga:423272%09red/gga:396533%09red/gga:419057%09red/gga:100359387%09red/gga:396507%09red/gga:396261%09red/gga:427721%09red
Butanoate metabolism	KEGG PATHWAY	gga00650	6	23	0.177298	0.849809	Novel03258|ENSGALG00000029827|ENSGALG00000011659|ENSGALG00000016536|ENSGALG00000042446|ENSGALG00000032544	http://www.genome.jp/kegg-bin/show_pathway?gga00650/gga:422715%09red/gga:395929%09red/gga:426992%09red/gga:426991%09red/gga:421587%09red/gga:420818%09red
Nicotinate and nicotinamide metabolism	KEGG PATHWAY	gga00760	6	25	0.220555	0.976316	ENSGALG00000003816|ENSGALG00000031397|ENSGALG00000014869|ENSGALG00000008185|ENSGALG00000020876|ENSGALG00000026187	http://www.genome.jp/kegg-bin/show_pathway?gga00760/gga:419675%09red/gga:427196%09red/gga:395080%09red/gga:424072%09red/gga:424071%09red/gga:424820%09red
Glyoxylate and dicarboxylate metabolism	KEGG PATHWAY	gga00630	6	25	0.220555	0.976316	ENSGALG00000031364|ENSGALG00000011950|ENSGALG00000011659|ENSGALG00000001949|ENSGALG00000008858|ENSGALG00000030466	http://www.genome.jp/kegg-bin/show_pathway?gga00630/gga:374009%09red/gga:416520%09red/gga:100858903%09red/gga:417517%09red/gga:421281%09red/gga:421587%09red
PPAR signaling pathway	KEGG PATHWAY	gga03320	12	59	0.224763	0.976316	ENSGALG00000007114|ENSGALG00000005554|ENSGALG00000008439|ENSGALG00000041470|ENSGALG00000040553|ENSGALG00000038933|ENSGALG00000041344|ENSGALG00000037050|ENSGALG00000002891|ENSGALG00000016285|ENSGALG00000040822|ENSGALG00000010628	http://www.genome.jp/kegg-bin/show_pathway?gga03320/gga:419557%09red/gga:420197%09red/gga:396246%09red/gga:424005%09red/gga:422547%09red/gga:396536%09red/gga:426008%09red/gga:418589%09red/gga:374120%09red/gga:404536%09red/gga:417730%09red
Phenylalanine, tyrosine and tryptophan biosynthesis	KEGG PATHWAY	gga00400	2	5	0.234795	0.988985	ENSGALG00000002321|ENSGALG00000007484	http://www.genome.jp/kegg-bin/show_pathway?gga00400/gga:396533%09red/gga:396261%09red
p53 signaling pathway	KEGG PATHWAY	gga04115	12	61	0.254794	1	ENSGALG00000003085|ENSGALG00000028115|ENSGALG00000016442|ENSGALG00000040794|ENSGALG00000037603|ENSGALG00000032699|ENSGALG00000042418|ENSGALG00000011020|ENSGALG00000025810|ENSGALG00000033960|ENSGALG00000004161|ENSGALG00000004897	http://www.genome.jp/kegg-bin/show_pathway?gga04115/gga:396252%09red/gga:100859755%09red/gga:396167%09red/gga:420231%09red/gga:408037%09red/gga:420624%09red/gga:374260%09red/gga:421936%09red/gga:425204%09red/gga:415400%09red/gga:100529062%09red/gga:421766%09red
Pentose phosphate pathway	KEGG PATHWAY	gga00030	5	21	0.255768	1	ENSGALG00000011016|Novel02501|ENSGALG00000033271|ENSGALG00000041352|ENSGALG00000012612	http://www.genome.jp/kegg-bin/show_pathway?gga00030/gga:374064%09red/gga:395492%09red/gga:395217%09red/gga:424691%09red
Fatty acid degradation	KEGG PATHWAY	gga00071	7	33	0.274073	1	ENSGALG00000016555|ENSGALG00000031142|ENSGALG00000011659|ENSGALG00000002891|ENSGALG00000016536|ENSGALG00000010628|ENSGALG00000031563	http://www.genome.jp/kegg-bin/show_pathway?gga00071/gga:416657%09red/gga:426847%09red/gga:422547%09red/gga:424005%09red/gga:421587%09red/gga:421995%09red/gga:395929%09red
Cysteine and methionine metabolism	KEGG PATHWAY	gga00270	7	33	0.274073	1	ENSGALG00000006300|ENSGALG00000007484|ENSGALG00000041461|ENSGALG00000002321|ENSGALG00000001949|ENSGALG00000019175|ENSGALG00000008858	http://www.genome.jp/kegg-bin/show_pathway?gga00270/gga:396533%09red/gga:417517%09red/gga:418544%09red/gga:396221%09red/gga:419287%09red/gga:421281%09red/gga:396261%09red
Homologous recombination	KEGG PATHWAY	gga03440	5	24	0.337424	1	ENSGALG00000030313|ENSGALG00000007676|ENSGALG00000010356|ENSGALG00000039171|ENSGALG00000043597	http://www.genome.jp/kegg-bin/show_pathway?gga03440/gga:396086%09red/gga:424611%09red/gga:422104%09red/gga:418152%09red/gga:395449%09red
Vitamin B6 metabolism	KEGG PATHWAY	gga00750	2	7	0.339095	1	ENSGALG00000020876|ENSGALG00000008185	http://www.genome.jp/kegg-bin/show_pathway?gga00750/gga:424072%09red/gga:424071%09red
Tyrosine metabolism	KEGG PATHWAY	gga00350	6	31	0.364936	1	ENSGALG00000017237|ENSGALG00000007484|ENSGALG00000004343|ENSGALG00000002321|ENSGALG00000008185|ENSGALG00000020876	http://www.genome.jp/kegg-bin/show_pathway?gga00350/gga:373971%09red/gga:416852%09red/gga:396533%09red/gga:424072%09red/gga:396261%09red/gga:424071%09red
Phagosome	KEGG PATHWAY	gga04145	21	127	0.402527	1	ENSGALG00000007485|Novel00898|ENSGALG00000038393|ENSGALG00000043254|ENSGALG00000012821|ENSGALG00000008177|ENSGALG00000013056|ENSGALG00000007511|ENSGALG00000037953|Novel02909|ENSGALG00000009722|ENSGALG00000002507|ENSGALG00000008439|ENSGALG00000014804|ENSGALG00000011200|Novel00192|ENSGALG00000040822|ENSGALG00000008444|ENSGALG00000003256|Novel03046|ENSGALG00000000059	http://www.genome.jp/kegg-bin/show_pathway?gga04145/gga:420883%09red/gga:417051%09red/gga:396306%09red/gga:431043%09red/gga:416695%09red/gga:416694%09red/gga:374058%09red/gga:417467%09red/gga:395474%09red/gga:420571%09red/gga:374267%09red/gga:427721%09red/gga:417730%09red/gga:396191%09red/gga:425049%09red/gga:414837%09red/gga:396181%09red
Tryptophan metabolism	KEGG PATHWAY	gga00380	7	39	0.409377	1	ENSGALG00000004604|ENSGALG00000008185|ENSGALG00000011659|ENSGALG00000014155|ENSGALG00000016536|ENSGALG00000001955|ENSGALG00000020876	http://www.genome.jp/kegg-bin/show_pathway?gga00380/gga:426429%09red/gga:421587%09red/gga:424072%09red/gga:417202%09red/gga:424071%09red/gga:395929%09red/gga:396066%09red
Pyrimidine metabolism	KEGG PATHWAY	gga00240	15	90	0.418673	1	ENSGALG00000005961|ENSGALG00000003816|ENSGALG00000039384|ENSGALG00000038362|ENSGALG00000016442|ENSGALG00000016524|ENSGALG00000031397|ENSGALG00000016278|ENSGALG00000010674|ENSGALG00000041028|ENSGALG00000030493|ENSGALG00000014897|ENSGALG00000007665|ENSGALG00000007191|ENSGALG00000006040	http://www.genome.jp/kegg-bin/show_pathway?gga00240/gga:422556%09red/gga:428659%09red/gga:419675%09red/gga:395719%09red/gga:421060%09red/gga:770922%09red/gga:420266%09red/gga:416997%09red/gga:428447%09red/gga:421936%09red/gga:395080%09red/gga:421878%09red/gga:419255%09red
Renin-angiotensin system	KEGG PATHWAY	gga04614	3	15	0.433188	1	ENSGALG00000038512|Novel01284|ENSGALG00000011117	http://www.genome.jp/kegg-bin/show_pathway?gga04614/gga:426049%09red/gga:396065%09red/gga:421543%09red
Phenylalanine metabolism	KEGG PATHWAY	gga00360	3	15	0.433188	1	ENSGALG00000002321|ENSGALG00000007484|ENSGALG00000004343	http://www.genome.jp/kegg-bin/show_pathway?gga00360/gga:396533%09red/gga:396261%09red/gga:416852%09red
Synthesis and degradation of ketone bodies	KEGG PATHWAY	gga00072	2	9	0.438646	1	ENSGALG00000011659|Novel03258	http://www.genome.jp/kegg-bin/show_pathway?gga00072/gga:422715%09red/gga:421587%09red
Base excision repair	KEGG PATHWAY	gga03410	5	28	0.448219	1	ENSGALG00000007665|ENSGALG00000039384|ENSGALG00000010719|Novel03083|ENSGALG00000033781	http://www.genome.jp/kegg-bin/show_pathway?gga03410/gga:416997%09red/gga:769677%09red/gga:430516%09red/gga:428750%09red
Drug metabolism - cytochrome P450	KEGG PATHWAY	gga00982	5	29	0.475348	1	ENSGALG00000040573|ENSGALG00000016325|ENSGALG00000006344|ENSGALG00000008185|ENSGALG00000020876	http://www.genome.jp/kegg-bin/show_pathway?gga00982/gga:396322%09red/gga:424072%09red/gga:424071%09red/gga:414896%09red/gga:395267%09red
Adherens junction	KEGG PATHWAY	gga04520	11	68	0.478906	1	ENSGALG00000010053|Novel03034|ENSGALG00000010049|ENSGALG00000015966|ENSGALG00000031152|Novel01195|ENSGALG00000002845|ENSGALG00000006480|ENSGALG00000031960|ENSGALG00000027853|ENSGALG00000014463	http://www.genome.jp/kegg-bin/show_pathway?gga04520/gga:395229%09red/gga:424568%09red/gga:417853%09red/gga:423648%09red/gga:396035%09red/gga:415591%09red/gga:418415%09red/gga:396263%09red/gga:395865%09red
One carbon pool by folate	KEGG PATHWAY	gga00670	3	17	0.505357	1	ENSGALG00000026757|ENSGALG00000014897|ENSGALG00000031364	http://www.genome.jp/kegg-bin/show_pathway?gga00670/gga:427317%09red/gga:416520%09red/gga:421060%09red
Adipocytokine signaling pathway	KEGG PATHWAY	gga04920	10	64	0.524556	1	ENSGALG00000029697|ENSGALG00000005554|ENSGALG00000001678|ENSGALG00000026287|ENSGALG00000041470|ENSGALG00000027786|ENSGALG00000010826|ENSGALG00000008439|ENSGALG00000040822|ENSGALG00000010628	http://www.genome.jp/kegg-bin/show_pathway?gga04920/gga:395299%09red/gga:429110%09red/gga:422547%09red/gga:396130%09red/gga:428017%09red/gga:374120%09red/gga:427017%09red/gga:404536%09red/gga:417730%09red
Galactose metabolism	KEGG PATHWAY	gga00052	5	32	0.553655	1	ENSGALG00000012260|ENSGALG00000008855|ENSGALG00000009036|ENSGALG00000011016|ENSGALG00000033271	http://www.genome.jp/kegg-bin/show_pathway?gga00052/gga:374064%09red/gga:424294%09red/gga:373900%09red/gga:424691%09red/gga:423232%09red
Gap junction	KEGG PATHWAY	gga04540	12	80	0.569535	1	ENSGALG00000015729|ENSGALG00000003085|ENSGALG00000000059|ENSGALG00000012821|ENSGALG00000013056|ENSGALG00000037953|ENSGALG00000007681|ENSGALG00000030251|ENSGALG00000012155|ENSGALG00000017179|Novel00192|ENSGALG00000008444	http://www.genome.jp/kegg-bin/show_pathway?gga04540/gga:396252%09red/gga:420883%09red/gga:431043%09red/gga:416695%09red/gga:416694%09red/gga:418978%09red/gga:427339%09red/gga:408035%09red/gga:395581%09red/gga:425049%09red/gga:420328%09red
Glycosphingolipid biosynthesis - globo series	KEGG PATHWAY	gga00603	2	12	0.5709	1	ENSGALG00000003340|ENSGALG00000013211	http://www.genome.jp/kegg-bin/show_pathway?gga00603/gga:417163%09red/gga:395860%09red
Dorso-ventral axis formation	KEGG PATHWAY	gga04320	3	19	0.572447	1	ENSGALG00000002645|ENSGALG00000031427|ENSGALG00000002150	http://www.genome.jp/kegg-bin/show_pathway?gga04320/gga:415326%09red/gga:775973%09red/gga:416804%09red
Caffeine metabolism	KEGG PATHWAY	gga00232	1	5	0.573731	1	ENSGALG00000008701	http://www.genome.jp/kegg-bin/show_pathway?gga00232/gga:396025%09red
beta-Alanine metabolism	KEGG PATHWAY	gga00410	4	26	0.575248	1	ENSGALG00000041028|ENSGALG00000043435|ENSGALG00000016536|ENSGALG00000043307	http://www.genome.jp/kegg-bin/show_pathway?gga00410/gga:420266%09red/gga:100359387%09red/gga:395929%09red/gga:423979%09red
Purine metabolism	KEGG PATHWAY	gga00230	22	148	0.581468	1	ENSGALG00000005961|ENSGALG00000016708|ENSGALG00000016442|ENSGALG00000015373|ENSGALG00000000549|ENSGALG00000008701|ENSGALG00000007665|ENSGALG00000014447|ENSGALG00000011618|ENSGALG00000016278|ENSGALG00000030251|ENSGALG00000001992|ENSGALG00000013941|ENSGALG00000011016|ENSGALG00000015141|ENSGALG00000031397|ENSGALG00000037029|ENSGALG00000039384|ENSGALG00000003816|ENSGALG00000029150|ENSGALG00000030493|…	http://www.genome.jp/kegg-bin/show_pathway?gga00230/gga:424691%09red/gga:419675%09red/gga:396456%09red/gga:422055%09red/gga:415859%09red/gga:769469%09red/gga:396002%09red/gga:421936%09red/gga:776127%09red/gga:396025%09red/gga:426534%09red/gga:416997%09red/gga:428447%09red/gga:395080%09red/gga:395092%09red/gga:427253%09red/gga:421692%09red/gga:770922%09red/gga:421878%09red/gga:420328%09red/gga:420…
Drug metabolism - other enzymes	KEGG PATHWAY	gga00983	4	27	0.602243	1	ENSGALG00000008701|ENSGALG00000041028|ENSGALG00000007191|ENSGALG00000006040	http://www.genome.jp/kegg-bin/show_pathway?gga00983/gga:396025%09red/gga:420266%09red/gga:395719%09red/gga:419255%09red
Fatty acid elongation	KEGG PATHWAY	gga00062	3	20	0.603787	1	ENSGALG00000016536|ENSGALG00000016555|ENSGALG00000031142	http://www.genome.jp/kegg-bin/show_pathway?gga00062/gga:421995%09red/gga:395929%09red/gga:426847%09red
Mismatch repair	KEGG PATHWAY	gga03430	3	20	0.603787	1	ENSGALG00000017064|ENSGALG00000010748|Novel03083	http://www.genome.jp/kegg-bin/show_pathway?gga03430/gga:421505%09red/gga:418907%09red/gga:430516%09red
Cell adhesion molecules (CAMs)	KEGG PATHWAY	gga04514	16	112	0.638183	1	ENSGALG00000015624|ENSGALG00000010053|ENSGALG00000031122|ENSGALG00000010875|ENSGALG00000008656|ENSGALG00000007511|ENSGALG00000040938|ENSGALG00000039609|ENSGALG00000015132|ENSGALG00000030372|Novel01195|ENSGALG00000038393|Novel03046|ENSGALG00000037004|ENSGALG00000026862|ENSGALG00000019114	http://www.genome.jp/kegg-bin/show_pathway?gga04514/gga:100859605%09red/gga:418415%09red/gga:772212%09red/gga:768456%09red/gga:424568%09red/gga:417051%09red/gga:395470%09red/gga:395565%09red/gga:374058%09red/gga:414745%09red/gga:424105%09red/gga:424980%09red/gga:418790%09red/gga:424336%09red/gga:424910%09red/gga:396181%09red
Glycerolipid metabolism	KEGG PATHWAY	gga00561	7	50	0.644158	1	ENSGALG00000023517|ENSGALG00000008795|ENSGALG00000004230|ENSGALG00000016285|ENSGALG00000016456|ENSGALG00000014569|ENSGALG00000032736	http://www.genome.jp/kegg-bin/show_pathway?gga00561/gga:416024%09red/gga:427495%09red/gga:772114%09red/gga:418589%09red/gga:431066%09red/gga:421945%09red/gga:423895%09red
ABC transporters	KEGG PATHWAY	gga02010	5	37	0.669725	1	ENSGALG00000030677|ENSGALG00000003553|ENSGALG00000016896|ENSGALG00000032986|ENSGALG00000008912	http://www.genome.jp/kegg-bin/show_pathway?gga02010/gga:418791%09red/gga:420534%09red/gga:423767%09red/gga:100049619%09red/gga:424011%09red
Nucleotide excision repair	KEGG PATHWAY	gga03420	5	37	0.669725	1	ENSGALG00000017064|ENSGALG00000007665|ENSGALG00000039384|Novel03083|ENSGALG00000033055	http://www.genome.jp/kegg-bin/show_pathway?gga03420/gga:416997%09red/gga:418907%09red/gga:430516%09red/gga:427153%09red
Progesterone-mediated oocyte maturation	KEGG PATHWAY	gga04914	10	74	0.689985	1	ENSGALG00000003085|ENSGALG00000008233|ENSGALG00000040023|ENSGALG00000002150|ENSGALG00000030251|ENSGALG00000025810|ENSGALG00000032699|ENSGALG00000006110|ENSGALG00000004161|ENSGALG00000011967	http://www.genome.jp/kegg-bin/show_pathway?gga04914/gga:396252%09red/gga:100529062%09red/gga:422675%09red/gga:416575%09red/gga:415326%09red/gga:421226%09red/gga:417739%09red/gga:415400%09red/gga:396167%09red/gga:420328%09red
Retinol metabolism	KEGG PATHWAY	gga00830	4	31	0.699215	1	ENSGALG00000020876|ENSGALG00000015147|ENSGALG00000008185|ENSGALG00000034701	http://www.genome.jp/kegg-bin/show_pathway?gga00830/gga:424072%09red/gga:395264%09red/gga:424071%09red/gga:776432%09red
Tight junction	KEGG PATHWAY	gga04530	16	118	0.71067	1	ENSGALG00000000920|ENSGALG00000031744|ENSGALG00000015358|ENSGALG00000037864|ENSGALG00000015966|ENSGALG00000035237|ENSGALG00000039977|ENSGALG00000002845|ENSGALG00000026862|ENSGALG00000027853|ENSGALG00000032404|ENSGALG00000042257|ENSGALG00000011889|ENSGALG00000019114|ENSGALG00000029606|ENSGALG00000014463	http://www.genome.jp/kegg-bin/show_pathway?gga04530/gga:417310%09red/gga:374069%09red/gga:768566%09red/gga:423648%09red/gga:418790%09red/gga:417309%09red/gga:423518%09red/gga:427788%09red/gga:396035%09red/gga:424149%09red/gga:396263%09red/gga:425665%09red/gga:424910%09red/gga:395534%09red
Phototransduction	KEGG PATHWAY	gga04744	3	24	0.713301	1	ENSGALG00000007495|ENSGALG00000015373|ENSGALG00000008424	http://www.genome.jp/kegg-bin/show_pathway?gga04744/gga:416692%09red/gga:395092%09red/gga:414892%09red
Glycosaminoglycan biosynthesis - heparan sulfate / heparin	KEGG PATHWAY	gga00534	3	24	0.713301	1	ENSGALG00000040675|ENSGALG00000012015|ENSGALG00000014934	http://www.genome.jp/kegg-bin/show_pathway?gga00534/gga:422686%09red/gga:422840%09red/gga:416581%09red
Intestinal immune network for IgA production	KEGG PATHWAY	gga04672	4	32	0.720598	1	ENSGALG00000008656|ENSGALG00000009870|ENSGALG00000038393|Novel02610	http://www.genome.jp/kegg-bin/show_pathway?gga04672/gga:417051%09red/gga:424105%09red/gga:395258%09red
Steroid biosynthesis	KEGG PATHWAY	gga00100	2	17	0.737978	1	ENSGALG00000003972|ENSGALG00000036915	http://www.genome.jp/kegg-bin/show_pathway?gga00100/gga:420335%09red/gga:416256%09red
Nitrogen metabolism	KEGG PATHWAY	gga00910	2	17	0.737978	1	ENSGALG00000005360|ENSGALG00000033428	http://www.genome.jp/kegg-bin/show_pathway?gga00910/gga:100858989%09red/gga:417647%09red
FoxO signaling pathway	KEGG PATHWAY	gga04068	16	121	0.743401	1	ENSGALG00000026287|Novel02793|ENSGALG00000013371|ENSGALG00000041202|ENSGALG00000010195|ENSGALG00000010826|ENSGALG00000025810|ENSGALG00000032699|ENSGALG00000012155|ENSGALG00000011661|ENSGALG00000006110|ENSGALG00000004161|ENSGALG00000013971|ENSGALG00000001678|ENSGALG00000040023|ENSGALG00000010476	http://www.genome.jp/kegg-bin/show_pathway?gga04068/gga:422497%09red/gga:100529062%09red/gga:374042%09red/gga:429110%09red/gga:423971%09red/gga:430495%09red/gga:424586%09red/gga:416575%09red/gga:428017%09red/gga:417739%09red/gga:415400%09red/gga:408035%09red/gga:427017%09red/gga:396167%09red/gga:395133%09red/gga:420343%09red
Sphingolipid metabolism	KEGG PATHWAY	gga00600	6	49	0.753824	1	ENSGALG00000034950|ENSGALG00000037467|ENSGALG00000036106|ENSGALG00000015151|ENSGALG00000012018|ENSGALG00000010535	http://www.genome.jp/kegg-bin/show_pathway?gga00600/gga:421092%09red/gga:415619%09red/gga:374033%09red/gga:419077%09red/gga:768823%09red/gga:422529%09red
MAPK signaling pathway	KEGG PATHWAY	gga04010	29	214	0.756098	1	ENSGALG00000027771|ENSGALG00000040855|ENSGALG00000006368|ENSGALG00000009450|Novel01775|ENSGALG00000037927|ENSGALG00000008262|ENSGALG00000007706|ENSGALG00000001475|ENSGALG00000037744|ENSGALG00000038087|ENSGALG00000015708|ENSGALG00000035237|ENSGALG00000012155|ENSGALG00000010440|ENSGALG00000039176|ENSGALG00000001926|ENSGALG00000035051|ENSGALG00000009495|ENSGALG00000005400|ENSGALG00000040360|ENSGALG0…	http://www.genome.jp/kegg-bin/show_pathway?gga04010/gga:417739%09red/gga:415578%09red/gga:396515%09red/gga:424412%09red/gga:408035%09red/gga:416526%09red/gga:427900%09red/gga:374192%09red/gga:425527%09red/gga:395985%09red/gga:100858193%09red/gga:396313%09red/gga:423085%09red/gga:378890%09red/gga:374169%09red/gga:396259%09red/gga:417428%09red/gga:771985%09red/gga:396057%09red/gga:421340%09red/gga:…
Mucin type O-Glycan biosynthesis	KEGG PATHWAY	gga00512	3	26	0.758562	1	ENSGALG00000002242|ENSGALG00000014944|ENSGALG00000010960	http://www.genome.jp/kegg-bin/show_pathway?gga00512/gga:416796%09red/gga:427207%09red/gga:424177%09red
Ubiquinone and other terpenoid-quinone biosynthesis	KEGG PATHWAY	gga00130	1	9	0.758629	1	ENSGALG00000004343	http://www.genome.jp/kegg-bin/show_pathway?gga00130/gga:416852%09red
Melanogenesis	KEGG PATHWAY	gga04916	11	89	0.788569	1	ENSGALG00000042308|ENSGALG00000017237|ENSGALG00000005088|ENSGALG00000028069|ENSGALG00000039101|ENSGALG00000008424|ENSGALG00000030251|ENSGALG00000012735|ENSGALG00000006480|ENSGALG00000000839|ENSGALG00000031960	http://www.genome.jp/kegg-bin/show_pathway?gga04916/gga:416692%09red/gga:395229%09red/gga:420854%09red/gga:423737%09red/gga:373971%09red/gga:395572%09red/gga:419147%09red/gga:395562%09red/gga:395865%09red/gga:420328%09red/gga:427856%09red
Sulfur metabolism	KEGG PATHWAY	gga00920	1	10	0.790627	1	ENSGALG00000011020	http://www.genome.jp/kegg-bin/show_pathway?gga00920/gga:420624%09red
Glutathione metabolism	KEGG PATHWAY	gga00480	4	36	0.794834	1	ENSGALG00000016325|ENSGALG00000006344|ENSGALG00000016442|ENSGALG00000010633	http://www.genome.jp/kegg-bin/show_pathway?gga00480/gga:396322%09red/gga:421936%09red/gga:424643%09red/gga:414896%09red
Wnt signaling pathway	KEGG PATHWAY	gga04310	15	119	0.794935	1	ENSGALG00000003814|ENSGALG00000042308|ENSGALG00000005088|ENSGALG00000039209|ENSGALG00000041413|ENSGALG00000028069|ENSGALG00000000839|ENSGALG00000040993|ENSGALG00000003767|ENSGALG00000006480|ENSGALG00000031997|ENSGALG00000009241|ENSGALG00000031960|ENSGALG00000003473|ENSGALG00000042153	http://www.genome.jp/kegg-bin/show_pathway?gga04310/gga:429363%09red/gga:415729%09red/gga:374156%09red/gga:423737%09red/gga:378890%09red/gga:395546%09red/gga:428413%09red/gga:420732%09red/gga:395237%09red/gga:395229%09red/gga:395572%09red/gga:417831%09red/gga:395562%09red/gga:395865%09red/gga:427856%09red
Riboflavin metabolism	KEGG PATHWAY	gga00740	1	11	0.818386	1	ENSGALG00000017237	http://www.genome.jp/kegg-bin/show_pathway?gga00740/gga:373971%09red
Vascular smooth muscle contraction	KEGG PATHWAY	gga04270	12	100	0.824046	1	ENSGALG00000024449|ENSGALG00000005332|ENSGALG00000037744|ENSGALG00000008424|ENSGALG00000001416|ENSGALG00000030251|ENSGALG00000006273|ENSGALG00000000824|ENSGALG00000038512|ENSGALG00000012845|ENSGALG00000004980|ENSGALG00000011889	http://www.genome.jp/kegg-bin/show_pathway?gga04270/gga:428278%09red/gga:416692%09red/gga:374065%09red/gga:420893%09red/gga:423518%09red/gga:396356%09red/gga:395985%09red/gga:373890%09red/gga:395895%09red/gga:420022%09red/gga:396065%09red/gga:420328%09red
Histidine metabolism	KEGG PATHWAY	gga00340	2	21	0.828462	1	ENSGALG00000012377|ENSGALG00000043435	http://www.genome.jp/kegg-bin/show_pathway?gga00340/gga:100359387%09red/gga:424298%09red
Folate biosynthesis	KEGG PATHWAY	gga00790	1	12	0.842467	1	ENSGALG00000026757	http://www.genome.jp/kegg-bin/show_pathway?gga00790/gga:427317%09red
Non-homologous end-joining	KEGG PATHWAY	gga03450	1	12	0.842467	1	ENSGALG00000033781	http://www.genome.jp/kegg-bin/show_pathway?gga03450/gga:769677%09red
Regulation of actin cytoskeleton	KEGG PATHWAY	gga04810	22	177	0.84789	1	ENSGALG00000016937|ENSGALG00000007706|ENSGALG00000014463|ENSGALG00000042153|Novel02884|ENSGALG00000008365|ENSGALG00000010875|ENSGALG00000015708|ENSGALG00000010770|ENSGALG00000012155|ENSGALG00000017179|Novel03046|ENSGALG00000012845|ENSGALG00000006273|ENSGALG00000009495|Novel03034|ENSGALG00000005237|ENSGALG00000007511|ENSGALG00000003818|ENSGALG00000031152|ENSGALG00000000824|ENSGALG00000008947	http://www.genome.jp/kegg-bin/show_pathway?gga04810/gga:428278%09red/gga:415560%09red/gga:416246%09red/gga:415989%09red/gga:416734%09red/gga:396356%09red/gga:374058%09red/gga:396259%09red/gga:429363%09red/gga:395470%09red/gga:418978%09red/gga:396263%09red/gga:415591%09red/gga:396515%09red/gga:423195%09red/gga:396313%09red/gga:408035%09red/gga:418824%09red/gga:420893%09red/gga:420588%09red/gga:396…
Metabolism of xenobiotics by cytochrome P450	KEGG PATHWAY	gga00980	3	32	0.860477	1	ENSGALG00000016325|ENSGALG00000006344|ENSGALG00000010303	http://www.genome.jp/kegg-bin/show_pathway?gga00980/gga:396322%09red/gga:421447%09red/gga:414896%09red
Glycosphingolipid biosynthesis - ganglio series	KEGG PATHWAY	gga00604	1	13	0.863357	1	ENSGALG00000013211	http://www.genome.jp/kegg-bin/show_pathway?gga00604/gga:395860%09red
Pantothenate and CoA biosynthesis	KEGG PATHWAY	gga00770	1	14	0.881478	1	ENSGALG00000041028	http://www.genome.jp/kegg-bin/show_pathway?gga00770/gga:420266%09red
Glycosaminoglycan biosynthesis - keratan sulfate	KEGG PATHWAY	gga00533	1	14	0.881478	1	ENSGALG00000008440	http://www.genome.jp/kegg-bin/show_pathway?gga00533/gga:428866%09red
GnRH signaling pathway	KEGG PATHWAY	gga04912	8	77	0.890829	1	ENSGALG00000000277|ENSGALG00000005088|ENSGALG00000037744|ENSGALG00000008424|ENSGALG00000030251|ENSGALG00000040023|ENSGALG00000005332|ENSGALG00000000949	http://www.genome.jp/kegg-bin/show_pathway?gga04912/gga:416692%09red/gga:423737%09red/gga:770134%09red/gga:395985%09red/gga:417739%09red/gga:395654%09red/gga:395895%09red/gga:420328%09red
Steroid hormone biosynthesis	KEGG PATHWAY	gga00140	3	35	0.895581	1	Novel02817|ENSGALG00000039742|ENSGALG00000037951	http://www.genome.jp/kegg-bin/show_pathway?gga00140/gga:429828%09red/gga:426825%09red/gga:396015%09red
Neuroactive ligand-receptor interaction	KEGG PATHWAY	gga04080	32	261	0.901709	1	ENSGALG00000009095|ENSGALG00000005476|Novel02693|ENSGALG00000002707|ENSGALG00000015117|ENSGALG00000004096|ENSGALG00000001698|ENSGALG00000014206|ENSGALG00000040035|ENSGALG00000006575|ENSGALG00000009405|ENSGALG00000015729|ENSGALG00000008365|ENSGALG00000005223|ENSGALG00000013371|ENSGALG00000001416|ENSGALG00000042317|ENSGALG00000014975|ENSGALG00000037366|ENSGALG00000010357|ENSGALG00000013813|ENSGALG0…	http://www.genome.jp/kegg-bin/show_pathway?gga04080/gga:428610%09red/gga:420401%09red/gga:396275%09red/gga:395937%09red/gga:420386%09red/gga:428934%09red/gga:396065%09red/gga:414894%09red/gga:429951%09red/gga:395776%09red/gga:770511%09red/gga:427552%09red/gga:373890%09red/gga:396345%09red/gga:771215%09red/gga:428980%09red/gga:396138%09red/gga:430495%09red/gga:374001%09red/gga:769107%09red/gga:427…
Hedgehog signaling pathway	KEGG PATHWAY	gga04340	4	45	0.904403	1	ENSGALG00000028069|ENSGALG00000031707|ENSGALG00000010133|ENSGALG00000000839	http://www.genome.jp/kegg-bin/show_pathway?gga04340/gga:395615%09red/gga:395562%09red/gga:374187%09red/gga:427856%09red
Lysine degradation	KEGG PATHWAY	gga00310	4	45	0.904403	1	ENSGALG00000016536|ENSGALG00000011659|ENSGALG00000010286|ENSGALG00000014155	http://www.genome.jp/kegg-bin/show_pathway?gga00310/gga:423357%09red/gga:426429%09red/gga:395929%09red/gga:421587%09red
Selenocompound metabolism	KEGG PATHWAY	gga00450	1	16	0.910833	1	ENSGALG00000004604	http://www.genome.jp/kegg-bin/show_pathway?gga00450/gga:417202%09red
Peroxisome	KEGG PATHWAY	gga04146	7	74	0.925107	1	ENSGALG00000015057|ENSGALG00000035636|ENSGALG00000037443|ENSGALG00000011661|ENSGALG00000030164|ENSGALG00000008701|ENSGALG00000010628	http://www.genome.jp/kegg-bin/show_pathway?gga04146/gga:374042%09red/gga:100858352%09red/gga:422547%09red/gga:417195%09red/gga:770953%09red/gga:396025%09red/gga:426601%09red
Other types of O-glycan biosynthesis	KEGG PATHWAY	gga00514	2	29	0.930203	1	ENSGALG00000005550|ENSGALG00000016803	http://www.genome.jp/kegg-bin/show_pathway?gga00514/gga:396169%09red/gga:403122%09red
Other glycan degradation	KEGG PATHWAY	gga00511	1	18	0.932922	1	ENSGALG00000037467	http://www.genome.jp/kegg-bin/show_pathway?gga00511/gga:768823%09red
Glycosaminoglycan biosynthesis - chondroitin sulfate / dermatan sulfate	KEGG PATHWAY	gga00532	1	19	0.941822	1	ENSGALG00000010125	http://www.genome.jp/kegg-bin/show_pathway?gga00532/gga:422488%09red
TGF-beta signaling pathway	KEGG PATHWAY	gga04350	6	69	0.943839	1	ENSGALG00000040993|ENSGALG00000038984|ENSGALG00000003114|ENSGALG00000040575|ENSGALG00000036346|ENSGALG00000038355	http://www.genome.jp/kegg-bin/show_pathway?gga04350/gga:428655%09red/gga:428413%09red/gga:771058%09red/gga:373912%09red/gga:395887%09red/gga:374249%09red
Pentose and glucuronate interconversions	KEGG PATHWAY	gga00040	1	20	0.949541	1	ENSGALG00000008855	http://www.genome.jp/kegg-bin/show_pathway?gga00040/gga:373900%09red
Terpenoid backbone biosynthesis	KEGG PATHWAY	gga00900	1	20	0.949541	1	ENSGALG00000011659	http://www.genome.jp/kegg-bin/show_pathway?gga00900/gga:421587%09red
Biosynthesis of unsaturated fatty acids	KEGG PATHWAY	gga01040	1	20	0.949541	1	ENSGALG00000016536	http://www.genome.jp/kegg-bin/show_pathway?gga01040/gga:395929%09red
mTOR signaling pathway	KEGG PATHWAY	gga04150	4	52	0.949929	1	ENSGALG00000010290|ENSGALG00000039681|ENSGALG00000026971|ENSGALG00000010826	http://www.genome.jp/kegg-bin/show_pathway?gga04150/gga:374177%09red/gga:419605%09red/gga:395909%09red/gga:429110%09red
Glycosphingolipid biosynthesis - lacto and neolacto series	KEGG PATHWAY	gga00601	1	21	0.956237	1	ENSGALG00000013211	http://www.genome.jp/kegg-bin/show_pathway?gga00601/gga:395860%09red
Cytokine-cytokine receptor interaction	KEGG PATHWAY	gga04060	17	165	0.95859	1	ENSGALG00000017119|ENSGALG00000009870|ENSGALG00000028256|ENSGALG00000006106|ENSGALG00000006346|ENSGALG00000036346|ENSGALG00000004221|ENSGALG00000010290|ENSGALG00000026499|ENSGALG00000012155|ENSGALG00000038000|ENSGALG00000010338|Novel02610|ENSGALG00000035950|ENSGALG00000016693|Novel01354|Novel00186	http://www.genome.jp/kegg-bin/show_pathway?gga04060/gga:418943%09red/gga:395909%09red/gga:419692%09red/gga:420719%09red/gga:422510%09red/gga:425805%09red/gga:418666%09red/gga:395096%09red/gga:395451%09red/gga:770428%09red/gga:419067%09red/gga:395258%09red/gga:408035%09red/gga:427406%09red/gga:395887%09red/gga:425564%09red
VEGF signaling pathway	KEGG PATHWAY	gga04370	4	56	0.965975	1	ENSGALG00000040023|ENSGALG00000010290|ENSGALG00000041413|ENSGALG00000001926	http://www.genome.jp/kegg-bin/show_pathway?gga04370/gga:396227%09red/gga:378890%09red/gga:417739%09red/gga:395909%09red
Glycerophospholipid metabolism	KEGG PATHWAY	gga00564	7	86	0.971056	1	ENSGALG00000023517|ENSGALG00000008795|ENSGALG00000011227|ENSGALG00000015219|ENSGALG00000016456|ENSGALG00000041787|ENSGALG00000034741	http://www.genome.jp/kegg-bin/show_pathway?gga00564/gga:100857837%09red/gga:428743%09red/gga:772114%09red/gga:423895%09red/gga:422611%09red/gga:421945%09red/gga:768530%09red
ErbB signaling pathway	KEGG PATHWAY	gga04012	6	77	0.971511	1	ENSGALG00000005088|ENSGALG00000003126|ENSGALG00000012155|ENSGALG00000042812|ENSGALG00000000949|ENSGALG00000008947	http://www.genome.jp/kegg-bin/show_pathway?gga04012/gga:416734%09red/gga:423737%09red/gga:428937%09red/gga:395654%09red/gga:395671%09red/gga:408035%09red
Porphyrin and chlorophyll metabolism	KEGG PATHWAY	gga00860	1	25	0.975242	1	ENSGALG00000001375	http://www.genome.jp/kegg-bin/show_pathway?gga00860/gga:417329%09red
Endocytosis	KEGG PATHWAY	gga04144	19	192	0.978216	1	ENSGALG00000006045|ENSGALG00000033295|ENSGALG00000007485|ENSGALG00000012975|ENSGALG00000043287|ENSGALG00000010293|ENSGALG00000003126|ENSGALG00000043476|ENSGALG00000015708|ENSGALG00000041795|Novel02953|ENSGALG00000012155|ENSGALG00000004852|ENSGALG00000009495|ENSGALG00000030836|ENSGALG00000040035|ENSGALG00000008950|ENSGALG00000040351|ENSGALG00000043488	http://www.genome.jp/kegg-bin/show_pathway?gga04144/gga:420212%09red/gga:417772%09red/gga:415976%09red/gga:100859860%09red/gga:424895%09red/gga:427605%09red/gga:396449%09red/gga:395201%09red/gga:415406%09red/gga:417217%09red/gga:396515%09red/gga:427623%09red/gga:396259%09red/gga:373996%09red/gga:395671%09red/gga:408035%09red/gga:396191%09red/gga:418146%09red/gga:396265%09red
RNA degradation	KEGG PATHWAY	gga03018	4	63	0.983119	1	ENSGALG00000026858|ENSGALG00000007364|ENSGALG00000031403|ENSGALG00000003800	http://www.genome.jp/kegg-bin/show_pathway?gga03018/gga:419674%09red/gga:419932%09red/gga:396016%09red/gga:395225%09red
Ubiquitin mediated proteolysis	KEGG PATHWAY	gga04120	10	124	0.987948	1	ENSGALG00000030022|ENSGALG00000011562|ENSGALG00000009971|ENSGALG00000016739|ENSGALG00000027786|ENSGALG00000043488|ENSGALG00000041795|ENSGALG00000002781|ENSGALG00000033055|ENSGALG00000026380	http://www.genome.jp/kegg-bin/show_pathway?gga04120/gga:420212%09red/gga:395299%09red/gga:424563%09red/gga:418682%09red/gga:427153%09red/gga:373983%09red/gga:415406%09red/gga:100859413%09red/gga:421202%09red/gga:421577%09red
Amino sugar and nucleotide sugar metabolism	KEGG PATHWAY	gga00520	2	44	0.98848	1	ENSGALG00000011016|ENSGALG00000008855	http://www.genome.jp/kegg-bin/show_pathway?gga00520/gga:424691%09red/gga:373900%09red
Regulation of autophagy	KEGG PATHWAY	gga04140	1	31	0.98947	1	ENSGALG00000010826	http://www.genome.jp/kegg-bin/show_pathway?gga04140/gga:429110%09red
Inositol phosphate metabolism	KEGG PATHWAY	gga00562	3	57	0.98994	1	ENSGALG00000026687|ENSGALG00000014526|ENSGALG00000031678	http://www.genome.jp/kegg-bin/show_pathway?gga00562/gga:424214%09red/gga:396435%09red
N-Glycan biosynthesis	KEGG PATHWAY	gga00510	2	46	0.99101	1	ENSGALG00000005550|ENSGALG00000016803	http://www.genome.jp/kegg-bin/show_pathway?gga00510/gga:396169%09red/gga:403122%09red
Arachidonic acid metabolism	KEGG PATHWAY	gga00590	2	48	0.992994	1	ENSGALG00000030886|ENSGALG00000010633	http://www.genome.jp/kegg-bin/show_pathway?gga00590/gga:374110%09red/gga:424643%09red
Herpes simplex infection	KEGG PATHWAY	gga05168	11	143	0.994529	1	ENSGALG00000009870|ENSGALG00000003085|ENSGALG00000015122|ENSGALG00000027786|ENSGALG00000001565|ENSGALG00000011020|ENSGALG00000032699|ENSGALG00000038393|Novel02610|ENSGALG00000013793|ENSGALG00000040428	http://www.genome.jp/kegg-bin/show_pathway?gga05168/gga:396252%09red/gga:395299%09red/gga:420624%09red/gga:417051%09red/gga:373991%09red/gga:421086%09red/gga:422936%09red/gga:395258%09red/gga:100529062%09red/gga:417122%09red
Basal transcription factors	KEGG PATHWAY	gga03022	1	37	0.995523	1	ENSGALG00000015122	http://www.genome.jp/kegg-bin/show_pathway?gga03022/gga:421086%09red
Ether lipid metabolism	KEGG PATHWAY	gga00565	1	39	0.996634	1	ENSGALG00000015219	http://www.genome.jp/kegg-bin/show_pathway?gga00565/gga:100857837%09red
Influenza A	KEGG PATHWAY	gga05164	9	130	0.996664	1	Novel02693|ENSGALG00000027786|ENSGALG00000011020|ENSGALG00000040023|ENSGALG00000038393|ENSGALG00000016144|ENSGALG00000006503|ENSGALG00000040428|ENSGALG00000003584	http://www.genome.jp/kegg-bin/show_pathway?gga05164/gga:417051%09red/gga:395299%09red/gga:422936%09red/gga:418528%09red/gga:417420%09red/gga:416320%09red/gga:396345%09red/gga:417739%09red/gga:420624%09red
Cytosolic DNA-sensing pathway	KEGG PATHWAY	gga04623	1	40	0.997082	1	ENSGALG00000040428	http://www.genome.jp/kegg-bin/show_pathway?gga04623/gga:422936%09red
RIG-I-like receptor signaling pathway	KEGG PATHWAY	gga04622	2	55	0.997101	1	ENSGALG00000040023|ENSGALG00000040428	http://www.genome.jp/kegg-bin/show_pathway?gga04622/gga:422936%09red/gga:417739%09red
NOD-like receptor signaling pathway	KEGG PATHWAY	gga04621	1	41	0.99747	1	ENSGALG00000040023	http://www.genome.jp/kegg-bin/show_pathway?gga04621/gga:417739%09red
Phosphatidylinositol signaling system	KEGG PATHWAY	gga04070	3	75	0.99876	1	ENSGALG00000026687|ENSGALG00000008424|ENSGALG00000011227	http://www.genome.jp/kegg-bin/show_pathway?gga04070/gga:416692%09red/gga:424214%09red/gga:422611%09red
Aminoacyl-tRNA biosynthesis	KEGG PATHWAY	gga00970	2	64	0.999085	1	Novel01716|ENSGALG00000015338	http://www.genome.jp/kegg-bin/show_pathway?gga00970/gga:421781%09red/gga:418312%09red
Jak-STAT signaling pathway	KEGG PATHWAY	gga04630	7	125	0.999208	1	ENSGALG00000009870|ENSGALG00000002260|ENSGALG00000004221|ENSGALG00000027786|Novel02610|ENSGALG00000016693|Novel01354	http://www.genome.jp/kegg-bin/show_pathway?gga04630/gga:395299%09red/gga:419692%09red/gga:418666%09red/gga:770428%09red/gga:395258%09red/gga:395335%09red
Salmonella infection	KEGG PATHWAY	gga05132	2	66	0.999293	1	ENSGALG00000040023|ENSGALG00000009722	http://www.genome.jp/kegg-bin/show_pathway?gga05132/gga:420571%09red/gga:417739%09red
RNA transport	KEGG PATHWAY	gga03013	7	129	0.999471	1	ENSGALG00000041548|ENSGALG00000003800|ENSGALG00000005843|ENSGALG00000003818|ENSGALG00000012387|ENSGALG00000034575|ENSGALG00000031606	http://www.genome.jp/kegg-bin/show_pathway?gga03013/gga:416246%09red/gga:419674%09red/gga:395232%09red/gga:421628%09red/gga:423359%09red/gga:772284%09red/gga:419244%09red
Apoptosis	KEGG PATHWAY	gga04210	2	69	0.999521	1	ENSGALG00000041413|ENSGALG00000011020	http://www.genome.jp/kegg-bin/show_pathway?gga04210/gga:378890%09red/gga:420624%09red
Lysosome	KEGG PATHWAY	gga04142	4	107	0.999873	1	ENSGALG00000036106|ENSGALG00000041787|ENSGALG00000003256|Novel01284	http://www.genome.jp/kegg-bin/show_pathway?gga04142/gga:426049%09red/gga:395474%09red/gga:419077%09red/gga:768530%09red
Ribosome	KEGG PATHWAY	gga03010	5	120	0.99988	1	ENSGALG00000041401|ENSGALG00000041086|ENSGALG00000005458|ENSGALG00000036004|ENSGALG00000008597	http://www.genome.jp/kegg-bin/show_pathway?gga03010/gga:416542%09red/gga:421256%09red/gga:769996%09red/gga:421121%09red/gga:426941%09red
Toll-like receptor signaling pathway	KEGG PATHWAY	gga04620	2	83	0.999924	1	ENSGALG00000040023|ENSGALG00000010926	http://www.genome.jp/kegg-bin/show_pathway?gga04620/gga:395210%09red/gga:417739%09red
mRNA surveillance pathway	KEGG PATHWAY	gga03015	1	69	0.999954	1	ENSGALG00000003800	http://www.genome.jp/kegg-bin/show_pathway?gga03015/gga:419674%09red
Protein processing in endoplasmic reticulum	KEGG PATHWAY	gga04141	2	146	1	1	ENSGALG00000011562|ENSGALG00000023066	http://www.genome.jp/kegg-bin/show_pathway?gga04141/gga:427376%09red/gga:421577%09red

## Sheet: E12 vs 10w
#Term	Database	ID	Input number	Background number	P-Value	Corrected P-Value	Input	Hyperlink
Calcium signaling pathway	KEGG PATHWAY	gga04020	58	162	3.21644e-07	2.87401e-05	ENSGALG00000004809|ENSGALG00000037557|ENSGALG00000027583|ENSGALG00000008177|ENSGALG00000008424|Novel02909|ENSGALG00000004240|ENSGALG00000026687|ENSGALG00000040035|ENSGALG00000006835|ENSGALG00000034680|ENSGALG00000005524|Novel02274|ENSGALG00000013060|ENSGALG00000037744|ENSGALG00000003126|ENSGALG00000001416|ENSGALG00000030251|ENSGALG00000014508|Novel02797|Novel00158|ENSGALG00000003863|ENSGALG000000…	http://www.genome.jp/kegg-bin/show_pathway?gga04020/gga:396434%09red/gga:422546%09red/gga:423737%09red/gga:420935%09red/gga:723973%09red/gga:416845%09red/gga:424412%09red/gga:415741%09red/gga:428071%09red/gga:396065%09red/gga:427721%09red/gga:416526%09red/gga:395776%09red/gga:396356%09red/gga:427552%09red/gga:422827%09red/gga:420893%09red/gga:428209%09red/gga:777528%09red/gga:395985%09red/gga:396…
ECM-receptor interaction	KEGG PATHWAY	gga04512	35	73	4.19564e-07	2.87401e-05	ENSGALG00000007917|Novel00667|ENSGALG00000029182|ENSGALG00000008439|ENSGALG00000003852|ENSGALG00000014615|ENSGALG00000033420|Novel02884|ENSGALG00000041915|ENSGALG00000001343|ENSGALG00000008266|ENSGALG00000010875|ENSGALG00000003283|ENSGALG00000042009|ENSGALG00000041555|ENSGALG00000014804|ENSGALG00000019761|ENSGALG00000043377|ENSGALG00000043143|ENSGALG00000032023|ENSGALG00000008141|ENSGALG000000302…	http://www.genome.jp/kegg-bin/show_pathway?gga04512/gga:396306%09red/gga:396478%09red/gga:396243%09red/gga:374016%09red/gga:424435%09red/gga:419031%09red/gga:422350%09red/gga:417730%09red/gga:428268%09red/gga:417180%09red/gga:395470%09red/gga:428448%09red/gga:420120%09red/gga:414837%09red/gga:374046%09red/gga:769665%09red/gga:424526%09red/gga:395210%09red/gga:422348%09red/gga:396071%09red/gga:396…
Cardiac muscle contraction	KEGG PATHWAY	gga04260	29	60	3.57601e-06	0.000163304	ENSGALG00000014121|ENSGALG00000015358|ENSGALG00000027771|ENSGALG00000034088|Novel01712|ENSGALG00000037093|ENSGALG00000025819|ENSGALG00000042581|ENSGALG00000037744|ENSGALG00000038087|ENSGALG00000040757|Novel02798|ENSGALG00000040062|ENSGALG00000030212|Novel02520|ENSGALG00000008066|ENSGALG00000029319|ENSGALG00000005400|ENSGALG00000036212|ENSGALG00000025842|ENSGALG00000029845|ENSGALG00000005332|ENSGA…	http://www.genome.jp/kegg-bin/show_pathway?gga04260/gga:396472%09red/gga:416978%09red/gga:396433%09red/gga:772260%09red/gga:416013%09red/gga:100859614%09red/gga:396529%09red/gga:395985%09red/gga:770135%09red/gga:396467%09red/gga:395534%09red/gga:396468%09red/gga:100858114%09red/gga:770937%09red/gga:417428%09red/gga:396366%09red/gga:775974%09red/gga:422365%09red/gga:415752%09red/gga:421508%09red/g…
Carbon metabolism	KEGG PATHWAY	gga01200	33	90	7.48647e-05	0.00256411	ENSGALG00000007931|ENSGALG00000033271|ENSGALG00000031403|ENSGALG00000007606|ENSGALG00000014442|ENSGALG00000002988|ENSGALG00000041352|ENSGALG00000011950|ENSGALG00000026077|ENSGALG00000013167|ENSGALG00000007936|ENSGALG00000016993|ENSGALG00000008858|ENSGALG00000012612|ENSGALG00000037401|ENSGALG00000001949|Novel02501|ENSGALG00000031678|ENSGALG00000001992|ENSGALG00000007484|Novel02711|ENSGALG000000164…	http://www.genome.jp/kegg-bin/show_pathway?gga01200/gga:396456%09red/gga:422932%09red/gga:396533%09red/gga:417699%09red/gga:417517%09red/gga:374222%09red/gga:426429%09red/gga:423635%09red/gga:395758%09red/gga:396435%09red/gga:418857%09red/gga:424381%09red/gga:415746%09red/gga:419796%09red/gga:395492%09red/gga:416520%09red/gga:374193%09red/gga:374064%09red/gga:428969%09red/gga:374009%09red/gga:395…
Biosynthesis of amino acids	KEGG PATHWAY	gga01230	23	59	0.000444439	0.0121776	ENSGALG00000034655|ENSGALG00000033271|ENSGALG00000031403|ENSGALG00000007606|ENSGALG00000014442|ENSGALG00000002988|ENSGALG00000041352|ENSGALG00000011950|ENSGALG00000026077|ENSGALG00000007936|ENSGALG00000009519|ENSGALG00000019175|Novel02501|ENSGALG00000031678|ENSGALG00000001992|ENSGALG00000007484|Novel02711|ENSGALG00000037401|ENSGALG00000002638|ENSGALG00000014526|ENSGALG00000031364|ENSGALG000000297…	http://www.genome.jp/kegg-bin/show_pathway?gga01230/gga:423976%09red/gga:428969%09red/gga:374009%09red/gga:395492%09red/gga:416520%09red/gga:396456%09red/gga:396533%09red/gga:374064%09red/gga:374193%09red/gga:395833%09red/gga:396016%09red/gga:424381%09red/gga:423272%09red/gga:423635%09red/gga:396435%09red/gga:415362%09red/gga:396261%09red/gga:418544%09red/gga:415746%09red
Cell cycle	KEGG PATHWAY	gga04110	33	110	0.00142814	0.0299483	ENSGALG00000003085|ENSGALG00000028115|ENSGALG00000040794|Novel02961|ENSGALG00000025810|ENSGALG00000011967|ENSGALG00000034505|ENSGALG00000006037|ENSGALG00000041923|ENSGALG00000028318|ENSGALG00000003045|ENSGALG00000026137|ENSGALG00000036519|ENSGALG00000032699|ENSGALG00000001616|ENSGALG00000010623|ENSGALG00000012915|ENSGALG00000004161|ENSGALG00000011881|ENSGALG00000009971|ENSGALG00000012546|ENSGALG0…	http://www.genome.jp/kegg-bin/show_pathway?gga04110/gga:418058%09red/gga:374260%09red/gga:396142%09red/gga:100857489%09red/gga:424640%09red/gga:416158%09red/gga:416575%09red/gga:395076%09red/gga:421849%09red/gga:396167%09red/gga:422043%09red/gga:426764%09red/gga:378914%09red/gga:396252%09red/gga:429104%09red/gga:424563%09red/gga:396172%09red/gga:416776%09red/gga:424295%09red/gga:424507%09red/gga:…
DNA replication	KEGG PATHWAY	gga03030	14	30	0.0015302	0.0299483	ENSGALG00000006037|ENSGALG00000039384|Novel03083|ENSGALG00000012546|ENSGALG00000029292|ENSGALG00000016676|ENSGALG00000016278|ENSGALG00000004037|ENSGALG00000012348|Novel02961|ENSGALG00000017064|ENSGALG00000012915|ENSGALG00000007665|ENSGALG00000033781	http://www.genome.jp/kegg-bin/show_pathway?gga03030/gga:418058%09red/gga:423688%09red/gga:769677%09red/gga:422043%09red/gga:416027%09red/gga:424295%09red/gga:373984%09red/gga:426764%09red/gga:418907%09red/gga:416997%09red/gga:421878%09red/gga:430516%09red
Glycolysis / Gluconeogenesis	KEGG PATHWAY	gga00010	18	50	0.00359673	0.0615939	ENSGALG00000011016|ENSGALG00000006300|ENSGALG00000014526|ENSGALG00000012612|ENSGALG00000041352|ENSGALG00000033271|ENSGALG00000001992|ENSGALG00000026077|ENSGALG00000007931|ENSGALG00000007936|ENSGALG00000016430|ENSGALG00000007606|ENSGALG00000007904|ENSGALG00000014442|ENSGALG00000031403|Novel02501|ENSGALG00000031678|ENSGALG00000020160	http://www.genome.jp/kegg-bin/show_pathway?gga00010/gga:419796%09red/gga:395492%09red/gga:395217%09red/gga:396456%09red/gga:428969%09red/gga:417699%09red/gga:374193%09red/gga:395833%09red/gga:418610%09red/gga:424691%09red/gga:395979%09red/gga:396016%09red/gga:396221%09red/gga:396435%09red/gga:374064%09red
Citrate cycle (TCA cycle)	KEGG PATHWAY	gga00020	12	28	0.00556803	0.0847577	ENSGALG00000015961|ENSGALG00000016993|ENSGALG00000011950|ENSGALG00000013167|ENSGALG00000007931|ENSGALG00000016430|ENSGALG00000032157|ENSGALG00000008858|ENSGALG00000014155|ENSGALG00000007904|ENSGALG00000037401|ENSGALG00000001949	http://www.genome.jp/kegg-bin/show_pathway?gga00020/gga:419796%09red/gga:374009%09red/gga:422932%09red/gga:417699%09red/gga:417517%09red/gga:418610%09red/gga:421281%09red/gga:426429%09red/gga:395758%09red/gga:415362%09red/gga:418857%09red
Adrenergic signaling in cardiomyocytes	KEGG PATHWAY	gga04261	32	121	0.00817926	0.112056	ENSGALG00000015358|ENSGALG00000027771|ENSGALG00000034088|ENSGALG00000027583|ENSGALG00000008424|ENSGALG00000038512|ENSGALG00000037093|ENSGALG00000040035|ENSGALG00000040757|ENSGALG00000013060|ENSGALG00000037744|ENSGALG00000038087|ENSGALG00000001416|ENSGALG00000007409|ENSGALG00000030251|Novel02798|ENSGALG00000040062|ENSGALG00000030212|ENSGALG00000005400|ENSGALG00000040023|ENSGALG00000007082|ENSGALG0…	http://www.genome.jp/kegg-bin/show_pathway?gga04261/gga:423737%09red/gga:396472%09red/gga:420935%09red/gga:396433%09red/gga:417739%09red/gga:396065%09red/gga:395985%09red/gga:100859614%09red/gga:373890%09red/gga:420328%09red/gga:396378%09red/gga:396468%09red/gga:421508%09red/gga:396467%09red/gga:419774%09red/gga:417428%09red/gga:396366%09red/gga:422365%09red/gga:396529%09red/gga:395534%09red/gga:…
Alanine, aspartate and glutamate metabolism	KEGG PATHWAY	gga00250	12	32	0.0125347	0.15576	ENSGALG00000015057|Novel02711|ENSGALG00000011618|ENSGALG00000016524|ENSGALG00000007484|ENSGALG00000029719|ENSGALG00000040184|ENSGALG00000040436|ENSGALG00000002321|ENSGALG00000032544|ENSGALG00000038362|ENSGALG00000032113	http://www.genome.jp/kegg-bin/show_pathway?gga00250/gga:418255%09red/gga:428659%09red/gga:396533%09red/gga:422893%09red/gga:395395%09red/gga:776127%09red/gga:770953%09red/gga:396261%09red/gga:420818%09red/gga:415746%09red
Phagosome	KEGG PATHWAY	gga04145	32	127	0.0142969	0.15576	ENSGALG00000016446|Novel02414|ENSGALG00000004252|ENSGALG00000008177|Novel02909|ENSGALG00000009722|ENSGALG00000040586|ENSGALG00000040379|ENSGALG00000008444|ENSGALG00000033932|ENSGALG00000012119|ENSGALG00000000059|ENSGALG00000003283|ENSGALG00000033800|ENSGALG00000029381|ENSGALG00000014804|Novel02628|ENSGALG00000011200|ENSGALG00000002503|ENSGALG00000002507|ENSGALG00000008439|ENSGALG00000035075|ENSGA…	http://www.genome.jp/kegg-bin/show_pathway?gga04145/gga:396306%09red/gga:693256%09red/gga:425049%09red/gga:417730%09red/gga:417057%09red/gga:417051%09red/gga:420160%09red/gga:425389%09red/gga:395308%09red/gga:374267%09red/gga:100857553%09red/gga:396191%09red/gga:414837%09red/gga:768337%09red/gga:693260%09red/gga:427728%09red/gga:427721%09red/gga:420571%09red/gga:427727%09red/gga:421939%09red/gga:…
Focal adhesion	KEGG PATHWAY	gga04510	43	184	0.0147801	0.15576	ENSGALG00000041555|ENSGALG00000029182|Novel00667|ENSGALG00000003852|ENSGALG00000014615|ENSGALG00000033420|ENSGALG00000008262|Novel02884|ENSGALG00000041915|ENSGALG00000001343|ENSGALG00000008266|ENSGALG00000010875|ENSGALG00000043287|ENSGALG00000010290|ENSGALG00000014804|ENSGALG00000005180|ENSGALG00000019761|ENSGALG00000012155|ENSGALG00000017179|ENSGALG00000011200|ENSGALG00000012845|ENSGALG000000144…	http://www.genome.jp/kegg-bin/show_pathway?gga04510/gga:396306%09red/gga:396478%09red/gga:396243%09red/gga:374016%09red/gga:415578%09red/gga:424435%09red/gga:408035%09red/gga:419031%09red/gga:422350%09red/gga:417772%09red/gga:428268%09red/gga:417180%09red/gga:373996%09red/gga:395470%09red/gga:396356%09red/gga:420893%09red/gga:428448%09red/gga:420120%09red/gga:414837%09red/gga:374046%09red/gga:769…
Notch signaling pathway	KEGG PATHWAY	gga04330	14	44	0.0216382	0.206518	Novel00777|Novel01598|ENSGALG00000001136|Novel03171|Novel00961|ENSGALG00000037460|ENSGALG00000012442|Novel01736|ENSGALG00000001141|Novel00363|ENSGALG00000012075|Novel02114|ENSGALG00000011278|ENSGALG00000003952	http://www.genome.jp/kegg-bin/show_pathway?gga04330/gga:419185%09red/gga:418042%09red/gga:428441%09red/gga:419392%09red/gga:419390%09red/gga:424267%09red
Cell adhesion molecules (CAMs)	KEGG PATHWAY	gga04514	28	112	0.0226114	0.206518	Novel02414|ENSGALG00000040938|ENSGALG00000039609|ENSGALG00000015132|Novel01195|ENSGALG00000026862|ENSGALG00000006415|ENSGALG00000005257|ENSGALG00000033932|ENSGALG00000010053|ENSGALG00000010875|ENSGALG00000002192|ENSGALG00000038559|ENSGALG00000030372|ENSGALG00000041380|ENSGALG00000038393|ENSGALG00000031122|ENSGALG00000015737|ENSGALG00000007511|ENSGALG00000000141|ENSGALG00000014362|ENSGALG000000001…	http://www.genome.jp/kegg-bin/show_pathway?gga04514/gga:693256%09red/gga:417057%09red/gga:417051%09red/gga:425389%09red/gga:768456%09red/gga:395470%09red/gga:403158%09red/gga:100857553%09red/gga:418415%09red/gga:424980%09red/gga:693260%09red/gga:424568%09red/gga:424467%09red/gga:386580%09red/gga:427968%09red/gga:414745%09red/gga:396175%09red/gga:427944%09red/gga:101748655%09red/gga:424910%09red/g…
Nicotinate and nicotinamide metabolism	KEGG PATHWAY	gga00760	9	25	0.0345554	0.274009	ENSGALG00000041161|ENSGALG00000003816|ENSGALG00000014508|ENSGALG00000031397|ENSGALG00000014869|ENSGALG00000008185|ENSGALG00000042801|ENSGALG00000020876|ENSGALG00000026187	http://www.genome.jp/kegg-bin/show_pathway?gga00760/gga:419675%09red/gga:422827%09red/gga:427196%09red/gga:395080%09red/gga:424072%09red/gga:424071%09red/gga:424820%09red/gga:423871%09red
2-Oxocarboxylic acid metabolism	KEGG PATHWAY	gga01210	6	13	0.0356736	0.274009	ENSGALG00000029719|ENSGALG00000011950|ENSGALG00000007484|Novel02711|ENSGALG00000002321|ENSGALG00000037401	http://www.genome.jp/kegg-bin/show_pathway?gga01210/gga:415362%09red/gga:396533%09red/gga:374009%09red/gga:396261%09red/gga:415746%09red
Pyruvate metabolism	KEGG PATHWAY	gga00620	11	34	0.0360012	0.274009	ENSGALG00000027632|ENSGALG00000006300|ENSGALG00000005043|ENSGALG00000001992|ENSGALG00000007931|ENSGALG00000016430|ENSGALG00000001949|ENSGALG00000007904|ENSGALG00000005398|ENSGALG00000008858|ENSGALG00000036165	http://www.genome.jp/kegg-bin/show_pathway?gga00620/gga:419796%09red/gga:421217%09red/gga:396456%09red/gga:416537%09red/gga:417699%09red/gga:430557%09red/gga:417517%09red/gga:418610%09red/gga:421281%09red/gga:396221%09red
Oocyte meiosis	KEGG PATHWAY	gga04114	21	88	0.0619038	0.446359	ENSGALG00000003085|Novel02824|ENSGALG00000005088|Novel02858|ENSGALG00000040794|Novel02267|ENSGALG00000009971|ENSGALG00000001506|ENSGALG00000011967|ENSGALG00000008424|ENSGALG00000011281|ENSGALG00000041923|ENSGALG00000030251|ENSGALG00000013060|ENSGALG00000032699|ENSGALG00000007768|ENSGALG00000006110|ENSGALG00000004161|ENSGALG00000008233|ENSGALG00000041413|ENSGALG00000030879	http://www.genome.jp/kegg-bin/show_pathway?gga04114/gga:396252%09red/gga:416692%09red/gga:100529062%09red/gga:420231%09red/gga:428167%09red/gga:378890%09red/gga:420650%09red/gga:423737%09red/gga:420935%09red/gga:416575%09red/gga:395187%09red/gga:424563%09red/gga:422165%09red/gga:421226%09red/gga:425536%09red/gga:415400%09red/gga:416158%09red/gga:422675%09red/gga:420328%09red
Starch and sucrose metabolism	KEGG PATHWAY	gga00500	10	35	0.0778635	0.524674	ENSGALG00000011016|Novel02689|Novel02883|ENSGALG00000042771|ENSGALG00000039623|Novel02864|ENSGALG00000005147|ENSGALG00000038740|ENSGALG00000008855|ENSGALG00000017068	http://www.genome.jp/kegg-bin/show_pathway?gga00500/gga:418909%09red/gga:421248%09red/gga:424691%09red/gga:414139%09red/gga:418201%09red/gga:414140%09red/gga:378909%09red/gga:373900%09red/gga:427964%09red
Arginine and proline metabolism	KEGG PATHWAY	gga00330	13	50	0.0804246	0.524674	ENSGALG00000042030|ENSGALG00000006134|ENSGALG00000007484|ENSGALG00000008177|ENSGALG00000015602|Novel02909|ENSGALG00000009519|ENSGALG00000002321|ENSGALG00000043435|Novel00898|Novel00897|ENSGALG00000034655|Novel02761	http://www.genome.jp/kegg-bin/show_pathway?gga00330/gga:396508%09red/gga:423976%09red/gga:423272%09red/gga:396533%09red/gga:395807%09red/gga:419057%09red/gga:100359387%09red/gga:396507%09red/gga:427721%09red/gga:770036%09red/gga:396261%09red
MAPK signaling pathway	KEGG PATHWAY	gga04010	43	214	0.0880425	0.533797	ENSGALG00000025748|ENSGALG00000027771|ENSGALG00000043591|ENSGALG00000040855|ENSGALG00000015708|ENSGALG00000006368|ENSGALG00000009450|ENSGALG00000037927|ENSGALG00000008262|ENSGALG00000007706|ENSGALG00000001475|Novel02274|ENSGALG00000037744|ENSGALG00000038087|ENSGALG00000011715|ENSGALG00000028376|ENSGALG00000036093|ENSGALG00000035237|ENSGALG00000012155|ENSGALG00000010440|ENSGALG00000039176|ENSGALG0…	http://www.genome.jp/kegg-bin/show_pathway?gga04010/gga:417739%09red/gga:770905%09red/gga:415578%09red/gga:396515%09red/gga:424412%09red/gga:428871%09red/gga:408035%09red/gga:770435%09red/gga:396057%09red/gga:416526%09red/gga:427900%09red/gga:374192%09red/gga:395554%09red/gga:100859614%09red/gga:425527%09red/gga:418044%09red/gga:395985%09red/gga:100858193%09red/gga:396313%09red/gga:378917%09red/g…
Oxidative phosphorylation	KEGG PATHWAY	gga00190	25	115	0.0934177	0.533797	ENSGALG00000014121|ENSGALG00000008084|ENSGALG00000016446|ENSGALG00000013167|ENSGALG00000002033|Novel01712|ENSGALG00000009076|ENSGALG00000001330|ENSGALG00000009703|ENSGALG00000025819|ENSGALG00000001375|ENSGALG00000013191|ENSGALG00000042581|ENSGALG00000005789|ENSGALG00000008606|ENSGALG00000006073|Novel02520|ENSGALG00000008821|ENSGALG00000005465|ENSGALG00000008066|ENSGALG00000029319|ENSGALG000000283…	http://www.genome.jp/kegg-bin/show_pathway?gga00190/gga:420976%09red/gga:416978%09red/gga:419992%09red/gga:424102%09red/gga:395758%09red/gga:772260%09red/gga:423415%09red/gga:416013%09red/gga:417753%09red/gga:769492%09red/gga:417329%09red/gga:770724%09red/gga:770135%09red/gga:416543%09red/gga:100858114%09red/gga:770937%09red/gga:424978%09red/gga:775974%09red/gga:423179%09red/gga:415752%09red/gga:…
Fructose and mannose metabolism	KEGG PATHWAY	gga00051	9	32	0.0974082	0.533797	ENSGALG00000014526|ENSGALG00000041352|ENSGALG00000033271|ENSGALG00000026077|ENSGALG00000032385|ENSGALG00000012612|Novel02501|ENSGALG00000026776|ENSGALG00000031678	http://www.genome.jp/kegg-bin/show_pathway?gga00051/gga:395492%09red/gga:395217%09red/gga:374064%09red/gga:419040%09red/gga:415906%09red/gga:396435%09red
Intestinal immune network for IgA production	KEGG PATHWAY	gga04672	9	32	0.0974082	0.533797	ENSGALG00000009870|Novel02414|ENSGALG00000000141|ENSGALG00000016852|ENSGALG00000000162|ENSGALG00000014362|ENSGALG00000038393|Novel02610|ENSGALG00000006415	http://www.genome.jp/kegg-bin/show_pathway?gga04672/gga:395485%09red/gga:693256%09red/gga:417051%09red/gga:427944%09red/gga:395258%09red/gga:430189%09red/gga:374229%09red
Fanconi anemia pathway	KEGG PATHWAY	gga03460	12	48	0.108921	0.573931	ENSGALG00000030313|ENSGALG00000030022|ENSGALG00000003660|ENSGALG00000003720|ENSGALG00000034534|ENSGALG00000002781|ENSGALG00000006658|ENSGALG00000000516|ENSGALG00000000102|ENSGALG00000007676|ENSGALG00000024481|ENSGALG00000012618	http://www.genome.jp/kegg-bin/show_pathway?gga03460/gga:427468%09red/gga:101750641%09red/gga:415854%09red/gga:415770%09red/gga:415491%09red/gga:373983%09red/gga:415935%09red/gga:771417%09red/gga:396086%09red/gga:422104%09red/gga:421149%09red/gga:421202%09red
Propanoate metabolism	KEGG PATHWAY	gga00640	7	25	0.136528	0.68323	ENSGALG00000006300|ENSGALG00000005043|ENSGALG00000043307|ENSGALG00000015961|ENSGALG00000016993|ENSGALG00000032157|ENSGALG00000036165	http://www.genome.jp/kegg-bin/show_pathway?gga00640/gga:430557%09red/gga:423979%09red/gga:418857%09red/gga:396221%09red/gga:422932%09red
Glycine, serine and threonine metabolism	KEGG PATHWAY	gga00260	9	36	0.151656	0.68323	ENSGALG00000002638|ENSGALG00000002988|ENSGALG00000015053|ENSGALG00000031364|ENSGALG00000007931|ENSGALG00000007606|ENSGALG00000002855|ENSGALG00000019175|ENSGALG00000005363	http://www.genome.jp/kegg-bin/show_pathway?gga00260/gga:428969%09red/gga:417146%09red/gga:416520%09red/gga:417699%09red/gga:415993%09red/gga:424381%09red/gga:374222%09red/gga:423635%09red/gga:418544%09red
Pentose phosphate pathway	KEGG PATHWAY	gga00030	6	21	0.152845	0.68323	ENSGALG00000011016|ENSGALG00000041352|ENSGALG00000033271|ENSGALG00000026077|ENSGALG00000012612|Novel02501	http://www.genome.jp/kegg-bin/show_pathway?gga00030/gga:374064%09red/gga:395492%09red/gga:395217%09red/gga:424691%09red
Pyrimidine metabolism	KEGG PATHWAY	gga00240	19	90	0.154066	0.68323	ENSGALG00000030574|ENSGALG00000041161|ENSGALG00000005961|ENSGALG00000003816|ENSGALG00000039384|ENSGALG00000016442|ENSGALG00000016524|ENSGALG00000031397|ENSGALG00000016278|ENSGALG00000010674|ENSGALG00000028982|ENSGALG00000041028|ENSGALG00000017350|ENSGALG00000038362|ENSGALG00000014897|ENSGALG00000042801|ENSGALG00000030493|ENSGALG00000007665|ENSGALG00000007191	http://www.genome.jp/kegg-bin/show_pathway?gga00240/gga:422556%09red/gga:428659%09red/gga:419675%09red/gga:421936%09red/gga:395719%09red/gga:421060%09red/gga:421921%09red/gga:770922%09red/gga:420266%09red/gga:416997%09red/gga:428447%09red/gga:423871%09red/gga:395080%09red/gga:421878%09red/gga:419081%09red
Insulin signaling pathway	KEGG PATHWAY	gga04910	24	118	0.1546	0.68323	ENSGALG00000004801|ENSGALG00000039623|ENSGALG00000008424|Novel02864|ENSGALG00000010053|ENSGALG00000011360|Novel02883|ENSGALG00000010010|ENSGALG00000010440|ENSGALG00000004004|Novel02689|ENSGALG00000012612|ENSGALG00000001828|ENSGALG00000041047|ENSGALG00000006670|ENSGALG00000009435|ENSGALG00000005043|ENSGALG00000026287|ENSGALG00000002485|ENSGALG00000010826|ENSGALG00000021220|ENSGALG00000004336|ENSGA…	http://www.genome.jp/kegg-bin/show_pathway?gga04910/gga:416692%09red/gga:421248%09red/gga:417543%09red/gga:395217%09red/gga:101747406%09red/gga:429110%09red/gga:424568%09red/gga:422181%09red/gga:430557%09red/gga:418201%09red/gga:428692%09red/gga:419220%09red/gga:771961%09red/gga:428017%09red/gga:395114%09red/gga:424208%09red/gga:771172%09red/gga:378909%09red/gga:415741%09red/gga:427017%09red/gga:…
Cysteine and methionine metabolism	KEGG PATHWAY	gga00270	8	33	0.18803	0.805002	ENSGALG00000006300|ENSGALG00000007484|ENSGALG00000041461|ENSGALG00000002321|ENSGALG00000001949|ENSGALG00000033677|ENSGALG00000019175|ENSGALG00000008858	http://www.genome.jp/kegg-bin/show_pathway?gga00270/gga:396533%09red/gga:419287%09red/gga:417517%09red/gga:421281%09red/gga:419146%09red/gga:396221%09red/gga:396261%09red/gga:418544%09red
Purine metabolism	KEGG PATHWAY	gga00230	28	148	0.216536	0.898954	ENSGALG00000005961|ENSGALG00000016708|ENSGALG00000016442|ENSGALG00000008701|ENSGALG00000007665|ENSGALG00000014447|ENSGALG00000011618|ENSGALG00000013060|ENSGALG00000016278|ENSGALG00000017350|ENSGALG00000030251|ENSGALG00000001992|ENSGALG00000013941|ENSGALG00000041742|ENSGALG00000011016|ENSGALG00000041161|ENSGALG00000015141|ENSGALG00000031397|ENSGALG00000037379|ENSGALG00000037029|ENSGALG00000042801|…	http://www.genome.jp/kegg-bin/show_pathway?gga00230/gga:396456%09red/gga:769469%09red/gga:396002%09red/gga:420935%09red/gga:396025%09red/gga:770922%09red/gga:419675%09red/gga:776127%09red/gga:777528%09red/gga:428447%09red/gga:423871%09red/gga:424700%09red/gga:424691%09red/gga:420842%09red/gga:427253%09red/gga:422055%09red/gga:421936%09red/gga:426534%09red/gga:416997%09red/gga:420328%09red/gga:395…
Phenylalanine, tyrosine and tryptophan biosynthesis	KEGG PATHWAY	gga00400	2	5	0.245655	0.989843	ENSGALG00000002321|ENSGALG00000007484	http://www.genome.jp/kegg-bin/show_pathway?gga00400/gga:396533%09red/gga:396261%09red
Tyrosine metabolism	KEGG PATHWAY	gga00350	7	31	0.255157	0.998757	ENSGALG00000016899|ENSGALG00000017237|ENSGALG00000007484|ENSGALG00000002321|ENSGALG00000008185|ENSGALG00000020876|ENSGALG00000020160	http://www.genome.jp/kegg-bin/show_pathway?gga00350/gga:373971%09red/gga:396533%09red/gga:395979%09red/gga:395775%09red/gga:424072%09red/gga:396261%09red/gga:424071%09red
p53 signaling pathway	KEGG PATHWAY	gga04115	12	61	0.288756	1	ENSGALG00000003085|ENSGALG00000028318|ENSGALG00000016442|ENSGALG00000040794|ENSGALG00000037603|ENSGALG00000042418|ENSGALG00000011020|ENSGALG00000025810|ENSGALG00000032699|ENSGALG00000028115|ENSGALG00000004161|ENSGALG00000004897	http://www.genome.jp/kegg-bin/show_pathway?gga04115/gga:396252%09red/gga:396167%09red/gga:420231%09red/gga:408037%09red/gga:420624%09red/gga:374260%09red/gga:421936%09red/gga:425204%09red/gga:415400%09red/gga:378914%09red/gga:100529062%09red/gga:421766%09red
Adherens junction	KEGG PATHWAY	gga04520	13	68	0.308033	1	ENSGALG00000010053|Novel03034|ENSGALG00000008763|ENSGALG00000010049|ENSGALG00000031152|Novel01195|ENSGALG00000012456|ENSGALG00000002845|ENSGALG00000006480|ENSGALG00000015066|ENSGALG00000031960|ENSGALG00000027853|ENSGALG00000014463	http://www.genome.jp/kegg-bin/show_pathway?gga04520/gga:395229%09red/gga:418044%09red/gga:423648%09red/gga:424532%09red/gga:417853%09red/gga:424568%09red/gga:396035%09red/gga:415591%09red/gga:418415%09red/gga:396263%09red/gga:395865%09red/gga:421761%09red
Base excision repair	KEGG PATHWAY	gga03410	6	28	0.31552	1	ENSGALG00000039384|Novel03083|ENSGALG00000029292|ENSGALG00000010719|ENSGALG00000033781|ENSGALG00000007665	http://www.genome.jp/kegg-bin/show_pathway?gga03410/gga:428750%09red/gga:416997%09red/gga:769677%09red/gga:430516%09red/gga:373984%09red
Nitrogen metabolism	KEGG PATHWAY	gga00910	4	17	0.319657	1	ENSGALG00000005360|ENSGALG00000030781|ENSGALG00000033700|ENSGALG00000033428	http://www.genome.jp/kegg-bin/show_pathway?gga00910/gga:420208%09red/gga:100858989%09red/gga:417647%09red/gga:396257%09red
Butanoate metabolism	KEGG PATHWAY	gga00650	5	23	0.332792	1	ENSGALG00000040436|ENSGALG00000032544|Novel03258|ENSGALG00000029827|ENSGALG00000042446	http://www.genome.jp/kegg-bin/show_pathway?gga00650/gga:422715%09red/gga:426992%09red/gga:426991%09red/gga:395395%09red/gga:420818%09red
Vascular smooth muscle contraction	KEGG PATHWAY	gga04270	18	100	0.342431	1	ENSGALG00000024449|ENSGALG00000005332|ENSGALG00000034970|ENSGALG00000043591|ENSGALG00000037744|ENSGALG00000037379|ENSGALG00000008424|ENSGALG00000001416|ENSGALG00000030251|ENSGALG00000013060|ENSGALG00000004980|ENSGALG00000006273|ENSGALG00000000824|ENSGALG00000038512|ENSGALG00000012845|Novel01117|ENSGALG00000043401|ENSGALG00000042105	http://www.genome.jp/kegg-bin/show_pathway?gga04270/gga:428278%09red/gga:416692%09red/gga:423014%09red/gga:396356%09red/gga:423229%09red/gga:776459%09red/gga:374065%09red/gga:420935%09red/gga:420893%09red/gga:395895%09red/gga:395985%09red/gga:373890%09red/gga:428871%09red/gga:100859339%09red/gga:100857499%09red/gga:420022%09red/gga:396065%09red/gga:420328%09red
Herpes simplex infection	KEGG PATHWAY	gga05168	25	143	0.351299	1	ENSGALG00000004594|ENSGALG00000003085|Novel02414|ENSGALG00000029381|ENSGALG00000011020|ENSGALG00000001565|ENSGALG00000033932|ENSGALG00000014297|ENSGALG00000033800|ENSGALG00000041192|ENSGALG00000032699|ENSGALG00000040428|ENSGALG00000041280|ENSGALG00000035075|ENSGALG00000041380|ENSGALG00000038393|ENSGALG00000013468|ENSGALG00000009870|ENSGALG00000000141|ENSGALG00000000162|ENSGALG00000033718|Novel026…	http://www.genome.jp/kegg-bin/show_pathway?gga05168/gga:422936%09red/gga:693256%09red/gga:396512%09red/gga:422720%09red/gga:417122%09red/gga:417057%09red/gga:417051%09red/gga:373991%09red/gga:425389%09red/gga:100857553%09red/gga:396252%09red/gga:396330%09red/gga:693260%09red/gga:417465%09red/gga:427728%09red/gga:414741%09red/gga:395258%09red/gga:420624%09red/gga:427727%09red/gga:424185%09red/gga:…
Vitamin B6 metabolism	KEGG PATHWAY	gga00750	2	7	0.353044	1	ENSGALG00000020876|ENSGALG00000008185	http://www.genome.jp/kegg-bin/show_pathway?gga00750/gga:424072%09red/gga:424071%09red
PPAR signaling pathway	KEGG PATHWAY	gga03320	11	59	0.355915	1	ENSGALG00000007114|ENSGALG00000005554|ENSGALG00000008439|ENSGALG00000007178|ENSGALG00000041470|ENSGALG00000038933|ENSGALG00000033511|ENSGALG00000041344|ENSGALG00000037050|ENSGALG00000000619|ENSGALG00000010628	http://www.genome.jp/kegg-bin/show_pathway?gga03320/gga:419557%09red/gga:423122%09red/gga:420197%09red/gga:396246%09red/gga:422547%09red/gga:396536%09red/gga:425055%09red/gga:374120%09red/gga:404536%09red/gga:769087%09red/gga:417730%09red
Homologous recombination	KEGG PATHWAY	gga03440	5	24	0.361456	1	ENSGALG00000030313|ENSGALG00000007676|ENSGALG00000010356|ENSGALG00000039171|ENSGALG00000043597	http://www.genome.jp/kegg-bin/show_pathway?gga03440/gga:396086%09red/gga:424611%09red/gga:422104%09red/gga:418152%09red/gga:395449%09red
Fatty acid biosynthesis	KEGG PATHWAY	gga00061	3	13	0.375879	1	ENSGALG00000005043|ENSGALG00000036165|ENSGALG00000010628	http://www.genome.jp/kegg-bin/show_pathway?gga00061/gga:430557%09red/gga:422547%09red
Glyoxylate and dicarboxylate metabolism	KEGG PATHWAY	gga00630	5	25	0.390174	1	ENSGALG00000001949|ENSGALG00000006134|ENSGALG00000008858|ENSGALG00000031364|ENSGALG00000011950	http://www.genome.jp/kegg-bin/show_pathway?gga00630/gga:770036%09red/gga:374009%09red/gga:417517%09red/gga:416520%09red/gga:421281%09red
Retinol metabolism	KEGG PATHWAY	gga00830	6	31	0.392571	1	ENSGALG00000010873|ENSGALG00000015147|ENSGALG00000008185|ENSGALG00000005408|ENSGALG00000020876|ENSGALG00000020160	http://www.genome.jp/kegg-bin/show_pathway?gga00830/gga:395264%09red/gga:395346%09red/gga:395979%09red/gga:424169%09red/gga:424072%09red/gga:424071%09red
Cytokine-cytokine receptor interaction	KEGG PATHWAY	gga04060	28	165	0.393011	1	ENSGALG00000025881|ENSGALG00000011668|ENSGALG00000016852|ENSGALG00000032717|ENSGALG00000011222|Novel00186|ENSGALG00000006415|ENSGALG00000010290|ENSGALG00000013372|ENSGALG00000012155|ENSGALG00000036346|ENSGALG00000026663|ENSGALG00000026499|ENSGALG00000032260|ENSGALG00000007121|ENSGALG00000008028|ENSGALG00000006318|Novel01276|ENSGALG00000038069|ENSGALG00000016693|ENSGALG00000009870|ENSGALG000000042…	http://www.genome.jp/kegg-bin/show_pathway?gga04060/gga:416586%09red/gga:100859707%09red/gga:419424%09red/gga:395872%09red/gga:408035%09red/gga:374229%09red/gga:101749221%09red/gga:395551%09red/gga:427718%09red/gga:420718%09red/gga:426054%09red/gga:419692%09red/gga:418666%09red/gga:378930%09red/gga:395887%09red/gga:425564%09red/gga:424705%09red/gga:395909%09red/gga:419771%09red/gga:417465%09red/g…
Nucleotide excision repair	KEGG PATHWAY	gga03420	7	37	0.393678	1	ENSGALG00000007665|ENSGALG00000039384|Novel03083|Novel00109|ENSGALG00000029292|ENSGALG00000017064|ENSGALG00000033055	http://www.genome.jp/kegg-bin/show_pathway?gga03420/gga:427153%09red/gga:416997%09red/gga:418907%09red/gga:430516%09red/gga:373984%09red
Gap junction	KEGG PATHWAY	gga04540	14	80	0.405556	1	ENSGALG00000015729|ENSGALG00000003085|ENSGALG00000000059|ENSGALG00000040379|ENSGALG00000013060|ENSGALG00000013056|ENSGALG00000007681|ENSGALG00000030251|Novel00192|ENSGALG00000012155|ENSGALG00000017179|ENSGALG00000040586|ENSGALG00000008444|ENSGALG00000042105	http://www.genome.jp/kegg-bin/show_pathway?gga04540/gga:396252%09red/gga:768337%09red/gga:423014%09red/gga:416695%09red/gga:416694%09red/gga:431043%09red/gga:420935%09red/gga:418978%09red/gga:427339%09red/gga:408035%09red/gga:395581%09red/gga:425049%09red/gga:420328%09red
Mismatch repair	KEGG PATHWAY	gga03430	4	20	0.418127	1	ENSGALG00000029292|ENSGALG00000010748|Novel03083|ENSGALG00000017064	http://www.genome.jp/kegg-bin/show_pathway?gga03430/gga:373984%09red/gga:421505%09red/gga:418907%09red/gga:430516%09red
beta-Alanine metabolism	KEGG PATHWAY	gga00410	5	26	0.418793	1	ENSGALG00000040436|ENSGALG00000041028|ENSGALG00000030574|ENSGALG00000043435|ENSGALG00000043307	http://www.genome.jp/kegg-bin/show_pathway?gga00410/gga:420266%09red/gga:100359387%09red/gga:395395%09red/gga:423979%09red
GnRH signaling pathway	KEGG PATHWAY	gga04912	13	77	0.457888	1	ENSGALG00000041285|ENSGALG00000005332|ENSGALG00000043591|ENSGALG00000037744|ENSGALG00000008424|ENSGALG00000043401|ENSGALG00000030251|ENSGALG00000040023|ENSGALG00000000277|ENSGALG00000013060|ENSGALG00000005088|ENSGALG00000000949|ENSGALG00000042105	http://www.genome.jp/kegg-bin/show_pathway?gga04912/gga:416692%09red/gga:423014%09red/gga:423737%09red/gga:423229%09red/gga:416496%09red/gga:420935%09red/gga:395985%09red/gga:417739%09red/gga:428871%09red/gga:395895%09red/gga:395654%09red/gga:770134%09red/gga:420328%09red
FoxO signaling pathway	KEGG PATHWAY	gga04068	20	121	0.462138	1	ENSGALG00000034505|ENSGALG00000011360|ENSGALG00000028318|ENSGALG00000026287|Novel02793|ENSGALG00000026137|ENSGALG00000041202|ENSGALG00000010195|ENSGALG00000010826|ENSGALG00000013372|ENSGALG00000025810|ENSGALG00000032699|ENSGALG00000012155|ENSGALG00000011661|ENSGALG00000006110|ENSGALG00000004161|ENSGALG00000013971|ENSGALG00000001678|ENSGALG00000040023|ENSGALG00000010476	http://www.genome.jp/kegg-bin/show_pathway?gga04068/gga:422497%09red/gga:100529062%09red/gga:374042%09red/gga:429110%09red/gga:423971%09red/gga:395133%09red/gga:424586%09red/gga:426054%09red/gga:416575%09red/gga:408035%09red/gga:428017%09red/gga:424208%09red/gga:417739%09red/gga:415400%09red/gga:378914%09red/gga:427017%09red/gga:396167%09red/gga:395076%09red/gga:420343%09red
Drug metabolism - cytochrome P450	KEGG PATHWAY	gga00982	5	29	0.502711	1	ENSGALG00000040573|ENSGALG00000006344|ENSGALG00000008185|ENSGALG00000020876|ENSGALG00000020160	http://www.genome.jp/kegg-bin/show_pathway?gga00982/gga:396322%09red/gga:424072%09red/gga:424071%09red/gga:395979%09red/gga:395267%09red
One carbon pool by folate	KEGG PATHWAY	gga00670	3	17	0.52639	1	ENSGALG00000026757|ENSGALG00000014897|ENSGALG00000031364	http://www.genome.jp/kegg-bin/show_pathway?gga00670/gga:427317%09red/gga:416520%09red/gga:421060%09red
Glycosaminoglycan biosynthesis - heparan sulfate / heparin	KEGG PATHWAY	gga00534	4	24	0.542957	1	ENSGALG00000026594|ENSGALG00000012015|ENSGALG00000014934|ENSGALG00000040675	http://www.genome.jp/kegg-bin/show_pathway?gga00534/gga:422686%09red/gga:416581%09red/gga:422840%09red/gga:428621%09red
Adipocytokine signaling pathway	KEGG PATHWAY	gga04920	10	64	0.564258	1	ENSGALG00000029697|ENSGALG00000005554|ENSGALG00000008439|ENSGALG00000011360|ENSGALG00000026287|ENSGALG00000034970|ENSGALG00000041470|ENSGALG00000010826|ENSGALG00000001678|ENSGALG00000010628	http://www.genome.jp/kegg-bin/show_pathway?gga04920/gga:429110%09red/gga:422547%09red/gga:396130%09red/gga:428017%09red/gga:374120%09red/gga:424208%09red/gga:776459%09red/gga:427017%09red/gga:404536%09red/gga:417730%09red
Influenza A	KEGG PATHWAY	gga05164	20	130	0.580398	1	ENSGALG00000041285|Novel02414|ENSGALG00000038393|ENSGALG00000014297|ENSGALG00000011715|ENSGALG00000000141|ENSGALG00000041192|ENSGALG00000000162|ENSGALG00000007171|ENSGALG00000016400|ENSGALG00000040023|ENSGALG00000016142|ENSGALG00000011020|ENSGALG00000013468|ENSGALG00000006503|ENSGALG00000040428|ENSGALG00000043603|ENSGALG00000011668|Novel02693|ENSGALG00000003584	http://www.genome.jp/kegg-bin/show_pathway?gga05164/gga:396330%09red/gga:428650%09red/gga:423504%09red/gga:422936%09red/gga:395313%09red/gga:416496%09red/gga:417051%09red/gga:693256%09red/gga:417420%09red/gga:417465%09red/gga:395872%09red/gga:416633%09red/gga:416320%09red/gga:396345%09red/gga:417739%09red/gga:422720%09red/gga:430189%09red/gga:424185%09red/gga:420624%09red
Caffeine metabolism	KEGG PATHWAY	gga00232	1	5	0.585269	1	ENSGALG00000008701	http://www.genome.jp/kegg-bin/show_pathway?gga00232/gga:396025%09red
Metabolic pathways	KEGG PATHWAY	gga01100	163	1049	0.595851	1	ENSGALG00000034655|ENSGALG00000008177|ENSGALG00000015219|ENSGALG00000009076|ENSGALG00000007606|ENSGALG00000003972|ENSGALG00000029827|ENSGALG00000016899|ENSGALG00000016442|ENSGALG00000011950|ENSGALG00000008084|ENSGALG00000007936|ENSGALG00000014869|ENSGALG00000037401|ENSGALG00000031678|ENSGALG00000010628|ENSGALG00000042446|ENSGALG00000008821|ENSGALG00000008066|ENSGALG00000031397|ENSGALG00000006134|…	http://www.genome.jp/kegg-bin/show_pathway?gga01100/gga:396456%09red/gga:420976%09red/gga:422893%09red/gga:416978%09red/gga:374222%09red/gga:422611%09red/gga:418857%09red/gga:416543%09red/gga:417163%09red/gga:373971%09red/gga:427495%09red/gga:419675%09red/gga:395719%09red/gga:776127%09red/gga:423895%09red/gga:424214%09red/gga:415807%09red/gga:420236%09red/gga:426992%09red/gga:426991%09red/gga:424…
Neuroactive ligand-receptor interaction	KEGG PATHWAY	gga04080	40	261	0.597524	1	ENSGALG00000009095|ENSGALG00000008733|ENSGALG00000005476|Novel02693|ENSGALG00000020331|ENSGALG00000013200|ENSGALG00000015117|ENSGALG00000006575|ENSGALG00000004096|ENSGALG00000040035|ENSGALG00000037841|ENSGALG00000009405|ENSGALG00000001690|ENSGALG00000015729|ENSGALG00000017228|ENSGALG00000005524|ENSGALG00000001282|ENSGALG00000005223|ENSGALG00000002707|ENSGALG00000042317|ENSGALG00000039403|Novel001…	http://www.genome.jp/kegg-bin/show_pathway?gga04080/gga:420401%09red/gga:420979%09red/gga:420386%09red/gga:428934%09red/gga:427853%09red/gga:414890%09red/gga:396065%09red/gga:414894%09red/gga:373956%09red/gga:429951%09red/gga:395776%09red/gga:427552%09red/gga:428072%09red/gga:428071%09red/gga:428209%09red/gga:373890%09red/gga:771952%09red/gga:396345%09red/gga:396275%09red/gga:396138%09red/gga:396…
Progesterone-mediated oocyte maturation	KEGG PATHWAY	gga04914	11	74	0.622766	1	ENSGALG00000003085|ENSGALG00000013060|ENSGALG00000006110|ENSGALG00000040023|ENSGALG00000030251|ENSGALG00000025810|ENSGALG00000032699|ENSGALG00000011881|ENSGALG00000011967|ENSGALG00000004161|ENSGALG00000008233	http://www.genome.jp/kegg-bin/show_pathway?gga04914/gga:396252%09red/gga:100529062%09red/gga:420935%09red/gga:422675%09red/gga:396172%09red/gga:416575%09red/gga:421226%09red/gga:417739%09red/gga:415400%09red/gga:396167%09red/gga:420328%09red
Drug metabolism - other enzymes	KEGG PATHWAY	gga00983	4	27	0.626811	1	ENSGALG00000008701|ENSGALG00000041028|ENSGALG00000030574|ENSGALG00000007191	http://www.genome.jp/kegg-bin/show_pathway?gga00983/gga:396025%09red/gga:420266%09red/gga:395719%09red
Taurine and hypotaurine metabolism	KEGG PATHWAY	gga00430	1	6	0.641871	1	ENSGALG00000040436	http://www.genome.jp/kegg-bin/show_pathway?gga00430/gga:395395%09red
Melanogenesis	KEGG PATHWAY	gga04916	13	89	0.64802	1	ENSGALG00000016899|ENSGALG00000042308|ENSGALG00000017237|ENSGALG00000005088|ENSGALG00000013060|ENSGALG00000039101|ENSGALG00000008424|ENSGALG00000030251|ENSGALG00000012735|ENSGALG00000006480|ENSGALG00000000839|ENSGALG00000031960|ENSGALG00000042105	http://www.genome.jp/kegg-bin/show_pathway?gga04916/gga:416692%09red/gga:373971%09red/gga:420854%09red/gga:423014%09red/gga:423737%09red/gga:420935%09red/gga:395229%09red/gga:395572%09red/gga:419147%09red/gga:395562%09red/gga:395865%09red/gga:420328%09red/gga:395775%09red
Steroid hormone biosynthesis	KEGG PATHWAY	gga00140	5	35	0.652973	1	Novel02817|ENSGALG00000010625|ENSGALG00000039742|ENSGALG00000005467|ENSGALG00000037951	http://www.genome.jp/kegg-bin/show_pathway?gga00140/gga:429828%09red/gga:426825%09red/gga:415807%09red/gga:396015%09red/gga:772291%09red
Pantothenate and CoA biosynthesis	KEGG PATHWAY	gga00770	2	14	0.662609	1	ENSGALG00000041028|ENSGALG00000030574	http://www.genome.jp/kegg-bin/show_pathway?gga00770/gga:420266%09red
Renin-angiotensin system	KEGG PATHWAY	gga04614	2	15	0.695624	1	ENSGALG00000038512|ENSGALG00000011117	http://www.genome.jp/kegg-bin/show_pathway?gga04614/gga:396065%09red/gga:421543%09red
Phenylalanine metabolism	KEGG PATHWAY	gga00360	2	15	0.695624	1	ENSGALG00000002321|ENSGALG00000007484	http://www.genome.jp/kegg-bin/show_pathway?gga00360/gga:396533%09red/gga:396261%09red
ABC transporters	KEGG PATHWAY	gga02010	5	37	0.696072	1	ENSGALG00000003553|ENSGALG00000035075|ENSGALG00000029381|ENSGALG00000016896|ENSGALG00000008912	http://www.genome.jp/kegg-bin/show_pathway?gga02010/gga:418791%09red/gga:420534%09red/gga:427728%09red/gga:427727%09red/gga:424011%09red
Galactose metabolism	KEGG PATHWAY	gga00052	4	32	0.742935	1	ENSGALG00000012260|ENSGALG00000008855|ENSGALG00000011016|ENSGALG00000033271	http://www.genome.jp/kegg-bin/show_pathway?gga00052/gga:374064%09red/gga:424294%09red/gga:424691%09red/gga:373900%09red
Tight junction	KEGG PATHWAY	gga04530	16	118	0.75432	1	ENSGALG00000000920|ENSGALG00000042257|ENSGALG00000031744|ENSGALG00000015358|ENSGALG00000037864|ENSGALG00000034970|ENSGALG00000035237|ENSGALG00000006520|ENSGALG00000002845|ENSGALG00000026862|ENSGALG00000027853|ENSGALG00000032404|ENSGALG00000039682|ENSGALG00000035301|ENSGALG00000029606|ENSGALG00000014463	http://www.genome.jp/kegg-bin/show_pathway?gga04530/gga:417310%09red/gga:768566%09red/gga:423648%09red/gga:417309%09red/gga:427788%09red/gga:396035%09red/gga:424149%09red/gga:776459%09red/gga:396263%09red/gga:425665%09red/gga:426867%09red/gga:424910%09red/gga:395534%09red/gga:396211%09red
Jak-STAT signaling pathway	KEGG PATHWAY	gga04630	17	125	0.755323	1	ENSGALG00000009870|ENSGALG00000008028|ENSGALG00000002260|ENSGALG00000006318|ENSGALG00000004221|ENSGALG00000025881|ENSGALG00000033087|ENSGALG00000012472|ENSGALG00000013372|Novel02610|ENSGALG00000037413|ENSGALG00000032260|ENSGALG00000011222|ENSGALG00000016693|Novel01276|ENSGALG00000033234|ENSGALG00000042471	http://www.genome.jp/kegg-bin/show_pathway?gga04630/gga:416586%09red/gga:420193%09red/gga:101749221%09red/gga:424705%09red/gga:419771%09red/gga:427718%09red/gga:100859707%09red/gga:426054%09red/gga:395294%09red/gga:419692%09red/gga:418666%09red/gga:395258%09red/gga:768406%09red/gga:395335%09red/gga:771315%09red/gga:395845%09red
alpha-Linolenic acid metabolism	KEGG PATHWAY	gga00592	3	25	0.755736	1	ENSGALG00000043591|ENSGALG00000007178|ENSGALG00000043401	http://www.genome.jp/kegg-bin/show_pathway?gga00592/gga:423229%09red/gga:423122%09red/gga:428871%09red
Wnt signaling pathway	KEGG PATHWAY	gga04310	16	119	0.764704	1	ENSGALG00000003814|ENSGALG00000042308|ENSGALG00000005088|ENSGALG00000039209|ENSGALG00000041413|ENSGALG00000000839|ENSGALG00000040993|ENSGALG00000003767|ENSGALG00000012456|ENSGALG00000006480|ENSGALG00000031997|ENSGALG00000009241|ENSGALG00000031960|ENSGALG00000003473|ENSGALG00000042105|ENSGALG00000042153	http://www.genome.jp/kegg-bin/show_pathway?gga04310/gga:429363%09red/gga:415729%09red/gga:374156%09red/gga:423014%09red/gga:423737%09red/gga:378890%09red/gga:395546%09red/gga:428413%09red/gga:420732%09red/gga:395237%09red/gga:418044%09red/gga:395229%09red/gga:395572%09red/gga:417831%09red/gga:395562%09red/gga:395865%09red
Synthesis and degradation of ketone bodies	KEGG PATHWAY	gga00072	1	9	0.769421	1	Novel03258	http://www.genome.jp/kegg-bin/show_pathway?gga00072/gga:422715%09red
Valine, leucine and isoleucine degradation	KEGG PATHWAY	gga00280	5	41	0.770766	1	Novel02767|ENSGALG00000020876|ENSGALG00000007931|ENSGALG00000008185|ENSGALG00000043307	http://www.genome.jp/kegg-bin/show_pathway?gga00280/gga:424072%09red/gga:417699%09red/gga:424071%09red/gga:419739%09red/gga:423979%09red
VEGF signaling pathway	KEGG PATHWAY	gga04370	7	56	0.774062	1	ENSGALG00000043591|ENSGALG00000010290|ENSGALG00000043401|ENSGALG00000012456|ENSGALG00000040023|ENSGALG00000041413|ENSGALG00000001926	http://www.genome.jp/kegg-bin/show_pathway?gga04370/gga:395909%09red/gga:378890%09red/gga:428871%09red/gga:396227%09red/gga:418044%09red/gga:417739%09red/gga:423229%09red
Endocytosis	KEGG PATHWAY	gga04144	26	192	0.798962	1	ENSGALG00000012975|ENSGALG00000041795|ENSGALG00000040035|ENSGALG00000033932|ENSGALG00000033295|ENSGALG00000043287|ENSGALG00000033800|ENSGALG00000003126|ENSGALG00000011715|ENSGALG00000043476|ENSGALG00000015708|ENSGALG00000012155|Novel02628|ENSGALG00000011041|ENSGALG00000008950|ENSGALG00000040907|ENSGALG00000009495|ENSGALG00000041380|ENSGALG00000004852|ENSGALG00000033510|ENSGALG00000043488|ENSGALG0…	http://www.genome.jp/kegg-bin/show_pathway?gga04144/gga:100859860%09red/gga:396515%09red/gga:408035%09red/gga:417772%09red/gga:423504%09red/gga:425389%09red/gga:418146%09red/gga:395201%09red/gga:373996%09red/gga:100857553%09red/gga:395671%09red/gga:396191%09red/gga:417057%09red/gga:693245%09red/gga:424698%09red/gga:396259%09red/gga:418043%09red/gga:415406%09red/gga:395294%09red/gga:420212%09red/g…
Sulfur metabolism	KEGG PATHWAY	gga00920	1	10	0.800902	1	ENSGALG00000011020	http://www.genome.jp/kegg-bin/show_pathway?gga00920/gga:420624%09red
Dorso-ventral axis formation	KEGG PATHWAY	gga04320	2	19	0.801811	1	ENSGALG00000002645|ENSGALG00000031427	http://www.genome.jp/kegg-bin/show_pathway?gga04320/gga:775973%09red/gga:416804%09red
Glutathione metabolism	KEGG PATHWAY	gga00480	4	36	0.814276	1	ENSGALG00000006344|ENSGALG00000017350|ENSGALG00000016442|ENSGALG00000010633	http://www.genome.jp/kegg-bin/show_pathway?gga00480/gga:396322%09red/gga:421936%09red/gga:419081%09red/gga:424643%09red
Pentose and glucuronate interconversions	KEGG PATHWAY	gga00040	2	20	0.822619	1	ENSGALG00000008855|ENSGALG00000017068	http://www.genome.jp/kegg-bin/show_pathway?gga00040/gga:418909%09red/gga:373900%09red
Riboflavin metabolism	KEGG PATHWAY	gga00740	1	11	0.828088	1	ENSGALG00000017237	http://www.genome.jp/kegg-bin/show_pathway?gga00740/gga:373971%09red
Other types of O-glycan biosynthesis	KEGG PATHWAY	gga00514	3	29	0.831583	1	ENSGALG00000012442|ENSGALG00000005550|ENSGALG00000016803	http://www.genome.jp/kegg-bin/show_pathway?gga00514/gga:396169%09red/gga:418042%09red/gga:403122%09red
Toll-like receptor signaling pathway	KEGG PATHWAY	gga04620	10	83	0.832891	1	ENSGALG00000010926|ENSGALG00000041280|ENSGALG00000014297|ENSGALG00000014362|ENSGALG00000032717|ENSGALG00000040023|ENSGALG00000041285|ENSGALG00000013468|ENSGALG00000011668|ENSGALG00000043603	http://www.genome.jp/kegg-bin/show_pathway?gga04620/gga:396330%09red/gga:395210%09red/gga:395551%09red/gga:416496%09red/gga:417465%09red/gga:395872%09red/gga:396512%09red/gga:417739%09red/gga:427944%09red/gga:422720%09red
Regulation of actin cytoskeleton	KEGG PATHWAY	gga04810	23	177	0.840047	1	ENSGALG00000025748|ENSGALG00000016937|ENSGALG00000007706|ENSGALG00000014463|Novel02884|ENSGALG00000008365|ENSGALG00000010875|ENSGALG00000015066|ENSGALG00000028376|ENSGALG00000015708|ENSGALG00000042153|ENSGALG00000012155|ENSGALG00000017179|ENSGALG00000012845|ENSGALG00000016866|ENSGALG00000006273|ENSGALG00000009495|Novel03034|ENSGALG00000020386|ENSGALG00000007511|ENSGALG00000031152|ENSGALG000000124…	http://www.genome.jp/kegg-bin/show_pathway?gga04810/gga:429363%09red/gga:396515%09red/gga:408035%09red/gga:420893%09red/gga:421761%09red/gga:395554%09red/gga:395470%09red/gga:396356%09red/gga:415591%09red/gga:396313%09red/gga:378917%09red/gga:418044%09red/gga:395394%09red/gga:396259%09red/gga:418978%09red/gga:772372%09red/gga:418824%09red/gga:428278%09red/gga:415560%09red/gga:396263%09red/gga:423…
Histidine metabolism	KEGG PATHWAY	gga00340	2	21	0.841442	1	ENSGALG00000043435|ENSGALG00000006306	http://www.genome.jp/kegg-bin/show_pathway?gga00340/gga:100359387%09red/gga:416035%09red
TGF-beta signaling pathway	KEGG PATHWAY	gga04350	8	69	0.842059	1	ENSGALG00000034505|ENSGALG00000040993|ENSGALG00000038984|ENSGALG00000026137|ENSGALG00000003114|ENSGALG00000040575|ENSGALG00000036346|ENSGALG00000038355	http://www.genome.jp/kegg-bin/show_pathway?gga04350/gga:428655%09red/gga:428413%09red/gga:771058%09red/gga:373912%09red/gga:395887%09red/gga:374249%09red/gga:395076%09red
Glycosphingolipid biosynthesis - globo series	KEGG PATHWAY	gga00603	1	12	0.851563	1	ENSGALG00000003340	http://www.genome.jp/kegg-bin/show_pathway?gga00603/gga:417163%09red
Folate biosynthesis	KEGG PATHWAY	gga00790	1	12	0.851563	1	ENSGALG00000026757	http://www.genome.jp/kegg-bin/show_pathway?gga00790/gga:427317%09red
Non-homologous end-joining	KEGG PATHWAY	gga03450	1	12	0.851563	1	ENSGALG00000033781	http://www.genome.jp/kegg-bin/show_pathway?gga03450/gga:769677%09red
RIG-I-like receptor signaling pathway	KEGG PATHWAY	gga04622	6	55	0.856384	1	ENSGALG00000014297|ENSGALG00000041192|ENSGALG00000011668|ENSGALG00000040023|ENSGALG00000023821|ENSGALG00000040428	http://www.genome.jp/kegg-bin/show_pathway?gga04622/gga:396330%09red/gga:422936%09red/gga:395872%09red/gga:417739%09red/gga:424185%09red/gga:100858653%09red
Ether lipid metabolism	KEGG PATHWAY	gga00565	4	39	0.856404	1	ENSGALG00000043591|ENSGALG00000043401|ENSGALG00000015219|ENSGALG00000011646	http://www.genome.jp/kegg-bin/show_pathway?gga00565/gga:423496%09red/gga:423229%09red/gga:100857837%09red/gga:428871%09red
Tryptophan metabolism	KEGG PATHWAY	gga00380	4	39	0.856404	1	ENSGALG00000020876|ENSGALG00000008185|ENSGALG00000001955|ENSGALG00000014155	http://www.genome.jp/kegg-bin/show_pathway?gga00380/gga:424072%09red/gga:426429%09red/gga:424071%09red/gga:396066%09red
Glycerophospholipid metabolism	KEGG PATHWAY	gga00564	10	86	0.860356	1	ENSGALG00000008795|ENSGALG00000043591|ENSGALG00000011227|ENSGALG00000015219|ENSGALG00000016456|ENSGALG00000011646|ENSGALG00000028928|ENSGALG00000043401|ENSGALG00000041787|ENSGALG00000034741	http://www.genome.jp/kegg-bin/show_pathway?gga00564/gga:100857837%09red/gga:423229%09red/gga:396136%09red/gga:423496%09red/gga:428743%09red/gga:423895%09red/gga:428871%09red/gga:422611%09red/gga:421945%09red/gga:768530%09red
Arachidonic acid metabolism	KEGG PATHWAY	gga00590	5	48	0.866555	1	ENSGALG00000005857|ENSGALG00000043591|ENSGALG00000030886|ENSGALG00000010633|ENSGALG00000043401	http://www.genome.jp/kegg-bin/show_pathway?gga00590/gga:374110%09red/gga:423769%09red/gga:423229%09red/gga:424643%09red/gga:428871%09red
Cytosolic DNA-sensing pathway	KEGG PATHWAY	gga04623	4	40	0.86851	1	ENSGALG00000014297|ENSGALG00000032717|ENSGALG00000040428|ENSGALG00000043603	http://www.genome.jp/kegg-bin/show_pathway?gga04623/gga:395551%09red/gga:422936%09red/gga:417465%09red/gga:396330%09red
Inositol phosphate metabolism	KEGG PATHWAY	gga00562	6	57	0.876536	1	ENSGALG00000014526|ENSGALG00000026687|ENSGALG00000004336|ENSGALG00000031678|ENSGALG00000042105|ENSGALG00000023266	http://www.genome.jp/kegg-bin/show_pathway?gga00562/gga:416996%09red/gga:424214%09red/gga:428692%09red/gga:423014%09red/gga:396435%09red
Salmonella infection	KEGG PATHWAY	gga05132	7	66	0.885997	1	ENSGALG00000041280|ENSGALG00000015066|ENSGALG00000009722|ENSGALG00000032717|ENSGALG00000040023|Novel00897|ENSGALG00000011668	http://www.genome.jp/kegg-bin/show_pathway?gga05132/gga:395807%09red/gga:395551%09red/gga:395872%09red/gga:396512%09red/gga:417739%09red/gga:420571%09red/gga:421761%09red
Fatty acid degradation	KEGG PATHWAY	gga00071	3	33	0.886248	1	ENSGALG00000010628|ENSGALG00000020160|ENSGALG00000031563	http://www.genome.jp/kegg-bin/show_pathway?gga00071/gga:416657%09red/gga:395979%09red/gga:422547%09red
Glycerolipid metabolism	KEGG PATHWAY	gga00561	5	50	0.886781	1	ENSGALG00000014569|ENSGALG00000008795|ENSGALG00000004230|ENSGALG00000016456|ENSGALG00000032736	http://www.genome.jp/kegg-bin/show_pathway?gga00561/gga:427495%09red/gga:431066%09red/gga:421945%09red/gga:416024%09red/gga:423895%09red
Phototransduction	KEGG PATHWAY	gga04744	2	24	0.887516	1	ENSGALG00000007495|ENSGALG00000008424	http://www.genome.jp/kegg-bin/show_pathway?gga04744/gga:416692%09red/gga:414892%09red
Glycosaminoglycan biosynthesis - keratan sulfate	KEGG PATHWAY	gga00533	1	14	0.889339	1	ENSGALG00000008440	http://www.genome.jp/kegg-bin/show_pathway?gga00533/gga:428866%09red
Fatty acid metabolism	KEGG PATHWAY	gga01212	4	42	0.890106	1	ENSGALG00000005043|ENSGALG00000036165|ENSGALG00000010628|ENSGALG00000007178	http://www.genome.jp/kegg-bin/show_pathway?gga01212/gga:430557%09red/gga:423122%09red/gga:422547%09red
mTOR signaling pathway	KEGG PATHWAY	gga04150	5	52	0.904316	1	ENSGALG00000002403|ENSGALG00000010290|ENSGALG00000039681|ENSGALG00000026971|ENSGALG00000010826	http://www.genome.jp/kegg-bin/show_pathway?gga04150/gga:374177%09red/gga:416800%09red/gga:419605%09red/gga:395909%09red/gga:429110%09red
Primary bile acid biosynthesis	KEGG PATHWAY	gga00120	1	15	0.904455	1	ENSGALG00000033511	http://www.genome.jp/kegg-bin/show_pathway?gga00120/gga:425055%09red
ErbB signaling pathway	KEGG PATHWAY	gga04012	8	77	0.90875	1	ENSGALG00000000949|ENSGALG00000005088|ENSGALG00000028318|ENSGALG00000003126|ENSGALG00000012155|ENSGALG00000028608|ENSGALG00000033510|ENSGALG00000015422	http://www.genome.jp/kegg-bin/show_pathway?gga04012/gga:423737%09red/gga:693245%09red/gga:395654%09red/gga:448833%09red/gga:373906%09red/gga:408035%09red/gga:395671%09red/gga:378914%09red
Mucin type O-Glycan biosynthesis	KEGG PATHWAY	gga00512	2	26	0.910971	1	ENSGALG00000010960|ENSGALG00000014944	http://www.genome.jp/kegg-bin/show_pathway?gga00512/gga:427207%09red/gga:424177%09red
N-Glycan biosynthesis	KEGG PATHWAY	gga00510	4	46	0.924157	1	ENSGALG00000007976|ENSGALG00000033790|ENSGALG00000005550|ENSGALG00000016803	http://www.genome.jp/kegg-bin/show_pathway?gga00510/gga:422339%09red/gga:415585%09red/gga:396169%09red/gga:403122%09red
Steroid biosynthesis	KEGG PATHWAY	gga00100	1	17	0.928777	1	ENSGALG00000003972	http://www.genome.jp/kegg-bin/show_pathway?gga00100/gga:416256%09red
Linoleic acid metabolism	KEGG PATHWAY	gga00591	2	28	0.929778	1	ENSGALG00000043591|ENSGALG00000043401	http://www.genome.jp/kegg-bin/show_pathway?gga00591/gga:423229%09red/gga:428871%09red
Peroxisome	KEGG PATHWAY	gga04146	7	74	0.938084	1	ENSGALG00000015057|ENSGALG00000035636|ENSGALG00000037443|ENSGALG00000011661|Novel00897|ENSGALG00000008701|ENSGALG00000010628	http://www.genome.jp/kegg-bin/show_pathway?gga04146/gga:374042%09red/gga:422547%09red/gga:417195%09red/gga:770953%09red/gga:396025%09red/gga:395807%09red/gga:426601%09red
Other glycan degradation	KEGG PATHWAY	gga00511	1	18	0.938508	1	ENSGALG00000037467	http://www.genome.jp/kegg-bin/show_pathway?gga00511/gga:768823%09red
Sphingolipid metabolism	KEGG PATHWAY	gga00600	4	49	0.943118	1	ENSGALG00000037467|ENSGALG00000015151|ENSGALG00000034950|ENSGALG00000013743	http://www.genome.jp/kegg-bin/show_pathway?gga00600/gga:421092%09red/gga:426249%09red/gga:768823%09red/gga:415619%09red
Glycosaminoglycan biosynthesis - chondroitin sulfate / dermatan sulfate	KEGG PATHWAY	gga00532	1	19	0.94691	1	ENSGALG00000010125	http://www.genome.jp/kegg-bin/show_pathway?gga00532/gga:422488%09red
NOD-like receptor signaling pathway	KEGG PATHWAY	gga04621	3	41	0.950585	1	ENSGALG00000040023|ENSGALG00000011668|ENSGALG00000043603	http://www.genome.jp/kegg-bin/show_pathway?gga04621/gga:395872%09red/gga:417739%09red/gga:417465%09red
Regulation of autophagy	KEGG PATHWAY	gga04140	2	31	0.951088	1	ENSGALG00000002403|ENSGALG00000010826	http://www.genome.jp/kegg-bin/show_pathway?gga04140/gga:416800%09red/gga:429110%09red
Biosynthesis of unsaturated fatty acids	KEGG PATHWAY	gga01040	1	20	0.954165	1	ENSGALG00000007178	http://www.genome.jp/kegg-bin/show_pathway?gga01040/gga:423122%09red
Metabolism of xenobiotics by cytochrome P450	KEGG PATHWAY	gga00980	2	32	0.956702	1	ENSGALG00000006344|ENSGALG00000020160	http://www.genome.jp/kegg-bin/show_pathway?gga00980/gga:396322%09red/gga:395979%09red
RNA degradation	KEGG PATHWAY	gga03018	5	63	0.964333	1	ENSGALG00000026858|ENSGALG00000011957|ENSGALG00000007364|ENSGALG00000031403|ENSGALG00000003800	http://www.genome.jp/kegg-bin/show_pathway?gga03018/gga:417992%09red/gga:419674%09red/gga:419932%09red/gga:396016%09red/gga:395225%09red
Phosphatidylinositol signaling system	KEGG PATHWAY	gga04070	6	75	0.972772	1	ENSGALG00000011227|ENSGALG00000008424|ENSGALG00000026687|ENSGALG00000004336|ENSGALG00000042105|ENSGALG00000023266	http://www.genome.jp/kegg-bin/show_pathway?gga04070/gga:416692%09red/gga:423014%09red/gga:416996%09red/gga:428692%09red/gga:422611%09red/gga:424214%09red
Porphyrin and chlorophyll metabolism	KEGG PATHWAY	gga00860	1	25	0.97802	1	ENSGALG00000001375	http://www.genome.jp/kegg-bin/show_pathway?gga00860/gga:417329%09red
Amino sugar and nucleotide sugar metabolism	KEGG PATHWAY	gga00520	2	44	0.990387	1	ENSGALG00000011016|ENSGALG00000008855	http://www.genome.jp/kegg-bin/show_pathway?gga00520/gga:424691%09red/gga:373900%09red
Hedgehog signaling pathway	KEGG PATHWAY	gga04340	2	45	0.991544	1	ENSGALG00000010133|ENSGALG00000000839	http://www.genome.jp/kegg-bin/show_pathway?gga04340/gga:374187%09red/gga:395562%09red
Ubiquitin mediated proteolysis	KEGG PATHWAY	gga04120	9	124	0.996069	1	ENSGALG00000030022|ENSGALG00000011562|ENSGALG00000009971|ENSGALG00000043488|ENSGALG00000041795|Novel00109|ENSGALG00000002781|ENSGALG00000033055|ENSGALG00000026380	http://www.genome.jp/kegg-bin/show_pathway?gga04120/gga:420212%09red/gga:424563%09red/gga:421202%09red/gga:427153%09red/gga:373983%09red/gga:415406%09red/gga:100859413%09red/gga:421577%09red
Apoptosis	KEGG PATHWAY	gga04210	3	69	0.99807	1	ENSGALG00000025881|ENSGALG00000041413|ENSGALG00000011020	http://www.genome.jp/kegg-bin/show_pathway?gga04210/gga:378890%09red/gga:420624%09red/gga:771315%09red
Lysine degradation	KEGG PATHWAY	gga00310	1	45	0.998842	1	ENSGALG00000014155	http://www.genome.jp/kegg-bin/show_pathway?gga00310/gga:426429%09red
Lysosome	KEGG PATHWAY	gga04142	4	107	0.999916	1	ENSGALG00000004252|ENSGALG00000008759|ENSGALG00000041787|ENSGALG00000005171	http://www.genome.jp/kegg-bin/show_pathway?gga04142/gga:424807%09red/gga:420160%09red/gga:424961%09red/gga:768530%09red
Aminoacyl-tRNA biosynthesis	KEGG PATHWAY	gga00970	1	64	0.99993	1	Novel01716	http://www.genome.jp/kegg-bin/show_pathway?gga00970/gga:418312%09red
mRNA surveillance pathway	KEGG PATHWAY	gga03015	1	69	0.999966	1	ENSGALG00000003800	http://www.genome.jp/kegg-bin/show_pathway?gga03015/gga:419674%09red
RNA transport	KEGG PATHWAY	gga03013	4	129	0.999995	1	ENSGALG00000031606|ENSGALG00000005843|ENSGALG00000041548|ENSGALG00000003800	http://www.genome.jp/kegg-bin/show_pathway?gga03013/gga:395232%09red/gga:419674%09red/gga:419244%09red/gga:772284%09red
Ribosome	KEGG PATHWAY	gga03010	2	120	1	1	ENSGALG00000005458|ENSGALG00000008597	http://www.genome.jp/kegg-bin/show_pathway?gga03010/gga:416542%09red/gga:421256%09red
Spliceosome	KEGG PATHWAY	gga03040	1	105	1	1	ENSGALG00000011715	http://www.genome.jp/kegg-bin/show_pathway?gga03040/gga:423504%09red
Protein processing in endoplasmic reticulum	KEGG PATHWAY	gga04141	3	146	1	1	ENSGALG00000011562|ENSGALG00000011715|ENSGALG00000027506	http://www.genome.jp/kegg-bin/show_pathway?gga04141/gga:427022%09red/gga:423504%09red/gga:421577%09red

## Sheet: E16 vs 1d
#Term	Database	ID	Input number	Background number	P-Value	Corrected P-Value	Input	Hyperlink
Cardiac muscle contraction	KEGG PATHWAY	gga04260	28	60	5.31884e-12	5.69116e-10	ENSGALG00000015358|ENSGALG00000035144|ENSGALG00000034088|Novel01712|ENSGALG00000039185|ENSGALG00000042581|ENSGALG00000000302|ENSGALG00000005789|ENSGALG00000032456|Novel02798|ENSGALG00000026091|ENSGALG00000030212|Novel02520|ENSGALG00000032079|ENSGALG00000008066|ENSGALG00000013022|ENSGALG00000032142|ENSGALG00000005400|ENSGALG00000007205|ENSGALG00000035334|ENSGALG00000029845|ENSGALG00000005332|ENSGA…	http://www.genome.jp/kegg-bin/show_pathway?gga04260/gga:396472%09red/gga:416978%09red/gga:396433%09red/gga:807639%09red/gga:807637%09red/gga:772260%09red/gga:420243%09red/gga:416013%09red/gga:100859614%09red/gga:395985%09red/gga:807635%09red/gga:770135%09red/gga:395534%09red/gga:396468%09red/gga:100858114%09red/gga:770937%09red/gga:775974%09red/gga:807641%09red/gga:421508%09red/gga:431629%09red/g…
Oxidative phosphorylation	KEGG PATHWAY	gga00190	34	115	7.58526e-10	4.05812e-08	ENSGALG00000035144|ENSGALG00000002033|ENSGALG00000037880|ENSGALG00000001330|ENSGALG00000009703|ENSGALG00000013191|ENSGALG00000042581|ENSGALG00000005789|ENSGALG00000013167|ENSGALG00000001452|ENSGALG00000032456|ENSGALG00000032142|ENSGALG00000036229|Novel02520|ENSGALG00000030436|ENSGALG00000032079|ENSGALG00000008066|ENSGALG00000028026|ENSGALG00000043768|Novel01712|ENSGALG00000042809|ENSGALG000000072…	http://www.genome.jp/kegg-bin/show_pathway?gga00190/gga:420976%09red/gga:374159%09red/gga:416978%09red/gga:419992%09red/gga:807639%09red/gga:807638%09red/gga:807636%09red/gga:395758%09red/gga:430210%09red/gga:807637%09red/gga:772260%09red/gga:807635%09red/gga:423415%09red/gga:416013%09red/gga:769492%09red/gga:770724%09red/gga:807643%09red/gga:100859320%09red/gga:420243%09red/gga:770135%09red/gga:…
Carbon metabolism	KEGG PATHWAY	gga01200	23	90	3.56619e-06	0.000127194	ENSGALG00000015961|ENSGALG00000033271|ENSGALG00000031403|ENSGALG00000002944|ENSGALG00000041352|ENSGALG00000011950|ENSGALG00000013167|ENSGALG00000016993|ENSGALG00000008858|ENSGALG00000012612|ENSGALG00000037401|ENSGALG00000001949|Novel02501|ENSGALG00000030466|ENSGALG00000002988|ENSGALG00000001992|ENSGALG00000007484|Novel02711|ENSGALG00000016430|ENSGALG00000032157|ENSGALG00000014155|ENSGALG000000338…	http://www.genome.jp/kegg-bin/show_pathway?gga01200/gga:374009%09red/gga:395492%09red/gga:395217%09red/gga:428994%09red/gga:396456%09red/gga:422932%09red/gga:374064%09red/gga:417517%09red/gga:418610%09red/gga:396016%09red/gga:421281%09red/gga:424381%09red/gga:426429%09red/gga:395758%09red/gga:415362%09red/gga:426573%09red/gga:418857%09red/gga:396261%09red/gga:415746%09red/gga:100858903%09red
Biosynthesis of amino acids	KEGG PATHWAY	gga01230	18	59	5.34802e-06	0.00014306	Novel02711|ENSGALG00000002944|ENSGALG00000041352|ENSGALG00000033271|ENSGALG00000001992|ENSGALG00000011950|ENSGALG00000007484|ENSGALG00000029719|ENSGALG00000031403|ENSGALG00000016196|ENSGALG00000019175|ENSGALG00000033888|ENSGALG00000037401|ENSGALG00000002479|Novel02501|ENSGALG00000030466|ENSGALG00000034655|ENSGALG00000002988	http://www.genome.jp/kegg-bin/show_pathway?gga01230/gga:423976%09red/gga:374009%09red/gga:395492%09red/gga:428994%09red/gga:396456%09red/gga:374064%09red/gga:396016%09red/gga:418544%09red/gga:424381%09red/gga:396261%09red/gga:415362%09red/gga:423628%09red/gga:418545%09red/gga:426573%09red/gga:415746%09red/gga:100858903%09red
Citrate cycle (TCA cycle)	KEGG PATHWAY	gga00020	12	28	1.34065e-05	0.000286899	ENSGALG00000015961|ENSGALG00000011950|ENSGALG00000013167|ENSGALG00000016993|ENSGALG00000032157|ENSGALG00000008858|ENSGALG00000014155|ENSGALG00000037401|ENSGALG00000033888|ENSGALG00000016430|ENSGALG00000030466|ENSGALG00000001949	http://www.genome.jp/kegg-bin/show_pathway?gga00020/gga:374009%09red/gga:100858903%09red/gga:422932%09red/gga:417517%09red/gga:418610%09red/gga:421281%09red/gga:426429%09red/gga:395758%09red/gga:415362%09red/gga:426573%09red/gga:418857%09red
Metabolic pathways	KEGG PATHWAY	gga01100	118	1049	3.3531e-05	0.000597969	ENSGALG00000034655|ENSGALG00000035144|ENSGALG00000015219|ENSGALG00000011950|ENSGALG00000041091|ENSGALG00000014869|ENSGALG00000001452|ENSGALG00000004491|ENSGALG00000037401|ENSGALG00000002479|ENSGALG00000010628|ENSGALG00000042446|ENSGALG00000016285|ENSGALG00000008066|ENSGALG00000031397|ENSGALG00000012612|ENSGALG00000007205|ENSGALG00000023435|ENSGALG00000040173|ENSGALG00000016524|ENSGALG00000027963|…	http://www.genome.jp/kegg-bin/show_pathway?gga01100/gga:396456%09red/gga:422893%09red/gga:416978%09red/gga:807646%09red/gga:430210%09red/gga:418857%09red/gga:395492%09red/gga:395719%09red/gga:807643%09red/gga:100859320%09red/gga:426992%09red/gga:426991%09red/gga:775974%09red/gga:431066%09red/gga:421995%09red/gga:395860%09red/gga:421248%09red/gga:395217%09red/gga:428659%09red/gga:807639%09red/gga:…
2-Oxocarboxylic acid metabolism	KEGG PATHWAY	gga01210	7	13	0.000305871	0.00467546	Novel02711|ENSGALG00000011950|ENSGALG00000007484|ENSGALG00000029719|ENSGALG00000037401|ENSGALG00000033888|ENSGALG00000030466	http://www.genome.jp/kegg-bin/show_pathway?gga01210/gga:374009%09red/gga:100858903%09red/gga:415362%09red/gga:396261%09red/gga:426573%09red/gga:415746%09red
ECM-receptor interaction	KEGG PATHWAY	gga04512	15	73	0.0012576	0.0168204	ENSGALG00000008439|ENSGALG00000033420|ENSGALG00000003923|ENSGALG00000042009|ENSGALG00000041555|ENSGALG00000029182|ENSGALG00000014804|ENSGALG00000005180|ENSGALG00000017272|ENSGALG00000009641|ENSGALG00000007917|ENSGALG00000011200|ENSGALG00000040822|ENSGALG00000033315|ENSGALG00000032023	http://www.genome.jp/kegg-bin/show_pathway?gga04512/gga:374046%09red/gga:396243%09red/gga:396548%09red/gga:396306%09red/gga:419031%09red/gga:396340%09red/gga:416163%09red/gga:395069%09red/gga:396076%09red/gga:414837%09red/gga:417730%09red
Propanoate metabolism	KEGG PATHWAY	gga00640	7	25	0.00628281	0.0746957	ENSGALG00000005043|ENSGALG00000038427|ENSGALG00000015961|ENSGALG00000016993|ENSGALG00000032157|Novel02978|ENSGALG00000036165	http://www.genome.jp/kegg-bin/show_pathway?gga00640/gga:430557%09red/gga:418857%09red/gga:422932%09red
Fatty acid biosynthesis	KEGG PATHWAY	gga00061	5	13	0.00706517	0.0755973	ENSGALG00000038427|Novel02978|ENSGALG00000005043|ENSGALG00000036165|ENSGALG00000010628	http://www.genome.jp/kegg-bin/show_pathway?gga00061/gga:430557%09red/gga:422547%09red
Pyruvate metabolism	KEGG PATHWAY	gga00620	8	34	0.00857232	0.0833853	ENSGALG00000005043|ENSGALG00000001992|ENSGALG00000038427|ENSGALG00000016430|ENSGALG00000008858|ENSGALG00000001949|Novel02978|ENSGALG00000036165	http://www.genome.jp/kegg-bin/show_pathway?gga00620/gga:430557%09red/gga:417517%09red/gga:418610%09red/gga:396456%09red/gga:421281%09red
DNA replication	KEGG PATHWAY	gga03030	7	30	0.0141182	0.125888	ENSGALG00000007665|ENSGALG00000039384|Novel03083|ENSGALG00000012546|ENSGALG00000004037|Novel02961|ENSGALG00000006037	http://www.genome.jp/kegg-bin/show_pathway?gga03030/gga:416027%09red/gga:423688%09red/gga:422043%09red/gga:418058%09red/gga:416997%09red/gga:430516%09red
Cell cycle	KEGG PATHWAY	gga04110	16	110	0.016726	0.133079	ENSGALG00000003085|ENSGALG00000040794|ENSGALG00000012546|ENSGALG00000009971|ENSGALG00000003045|ENSGALG00000036519|ENSGALG00000042418|ENSGALG00000036892|Novel02961|ENSGALG00000025810|ENSGALG00000006037|ENSGALG00000015874|ENSGALG00000010623|ENSGALG00000006110|ENSGALG00000004161|ENSGALG00000008233	http://www.genome.jp/kegg-bin/show_pathway?gga04110/gga:396252%09red/gga:421849%09red/gga:424563%09red/gga:420231%09red/gga:422043%09red/gga:418058%09red/gga:374260%09red/gga:378922%09red/gga:416027%09red/gga:100857489%09red/gga:424640%09red/gga:415400%09red/gga:396142%09red/gga:396167%09red/gga:421226%09red/gga:416575%09red
Adrenergic signaling in cardiomyocytes	KEGG PATHWAY	gga04261	17	121	0.0183817	0.133079	ENSGALG00000040035|ENSGALG00000015531|ENSGALG00000005332|ENSGALG00000015358|ENSGALG00000000302|ENSGALG00000034088|ENSGALG00000003911|ENSGALG00000037744|ENSGALG00000039185|ENSGALG00000000585|ENSGALG00000005400|ENSGALG00000013022|ENSGALG00000037138|Novel02798|ENSGALG00000030212|ENSGALG00000026091|ENSGALG00000029845	http://www.genome.jp/kegg-bin/show_pathway?gga04261/gga:421508%09red/gga:396468%09red/gga:422858%09red/gga:396472%09red/gga:100859614%09red/gga:100859571%09red/gga:415996%09red/gga:396433%09red/gga:395985%09red/gga:427623%09red/gga:395895%09red/gga:423090%09red/gga:395891%09red/gga:395534%09red
Alanine, aspartate and glutamate metabolism	KEGG PATHWAY	gga00250	7	32	0.0186559	0.133079	Novel02711|ENSGALG00000002944|ENSGALG00000016524|ENSGALG00000007484|ENSGALG00000029719|ENSGALG00000040184|ENSGALG00000032113	http://www.genome.jp/kegg-bin/show_pathway?gga00250/gga:418255%09red/gga:428994%09red/gga:422893%09red/gga:428659%09red/gga:396261%09red/gga:415746%09red
Calcium signaling pathway	KEGG PATHWAY	gga04020	21	162	0.0199914	0.133692	ENSGALG00000005215|ENSGALG00000034643|ENSGALG00000005332|ENSGALG00000034680|ENSGALG00000015203|ENSGALG00000006503|ENSGALG00000037744|ENSGALG00000039022|ENSGALG00000037557|ENSGALG00000006273|ENSGALG00000004801|ENSGALG00000040035|ENSGALG00000016518|Novel02797|ENSGALG00000013022|ENSGALG00000012845|Novel02798|ENSGALG00000010614|ENSGALG00000002485|ENSGALG00000041742|ENSGALG00000029845	http://www.genome.jp/kegg-bin/show_pathway?gga04020/gga:421508%09red/gga:416526%09red/gga:422546%09red/gga:396356%09red/gga:395891%09red/gga:416320%09red/gga:418612%09red/gga:723973%09red/gga:777528%09red/gga:395985%09red/gga:417543%09red/gga:396111%09red/gga:427623%09red/gga:422181%09red/gga:395895%09red/gga:420893%09red/gga:396528%09red
Cysteine and methionine metabolism	KEGG PATHWAY	gga00270	7	33	0.0212703	0.133878	ENSGALG00000001949|ENSGALG00000007484|ENSGALG00000041461|ENSGALG00000016196|ENSGALG00000008858|ENSGALG00000019175|ENSGALG00000002479	http://www.genome.jp/kegg-bin/show_pathway?gga00270/gga:417517%09red/gga:418544%09red/gga:419287%09red/gga:396261%09red/gga:421281%09red/gga:418545%09red/gga:423628%09red
p53 signaling pathway	KEGG PATHWAY	gga04115	10	61	0.0279226	0.165984	ENSGALG00000003085|ENSGALG00000016442|ENSGALG00000040794|ENSGALG00000012755|ENSGALG00000042418|ENSGALG00000011020|ENSGALG00000025810|ENSGALG00000033960|ENSGALG00000004161|ENSGALG00000004897	http://www.genome.jp/kegg-bin/show_pathway?gga04115/gga:396252%09red/gga:100859755%09red/gga:420624%09red/gga:420231%09red/gga:418090%09red/gga:421936%09red/gga:374260%09red/gga:425204%09red/gga:415400%09red/gga:396167%09red
Glycine, serine and threonine metabolism	KEGG PATHWAY	gga00260	7	36	0.0306125	0.172397	ENSGALG00000002988|ENSGALG00000004491|ENSGALG00000016196|ENSGALG00000002855|ENSGALG00000019175|ENSGALG00000005363|ENSGALG00000023435	http://www.genome.jp/kegg-bin/show_pathway?gga00260/gga:417146%09red/gga:415993%09red/gga:418544%09red/gga:395504%09red/gga:416370%09red/gga:418545%09red/gga:424381%09red
Fructose and mannose metabolism	KEGG PATHWAY	gga00051	6	32	0.0498872	0.257972	ENSGALG00000041352|ENSGALG00000033271|ENSGALG00000032385|ENSGALG00000012612|Novel02501|ENSGALG00000026776	http://www.genome.jp/kegg-bin/show_pathway?gga00051/gga:395217%09red/gga:374064%09red/gga:395492%09red/gga:415906%09red/gga:419040%09red
PPAR signaling pathway	KEGG PATHWAY	gga03320	9	59	0.05063	0.257972	ENSGALG00000007114|ENSGALG00000008439|ENSGALG00000041470|ENSGALG00000040553|ENSGALG00000016285|ENSGALG00000037050|ENSGALG00000002891|ENSGALG00000040822|ENSGALG00000010628	http://www.genome.jp/kegg-bin/show_pathway?gga03320/gga:419557%09red/gga:422547%09red/gga:424005%09red/gga:426008%09red/gga:396536%09red/gga:418589%09red/gga:374120%09red/gga:417730%09red
Fatty acid metabolism	KEGG PATHWAY	gga01212	7	42	0.0567292	0.268844	ENSGALG00000016555|ENSGALG00000038427|ENSGALG00000005043|ENSGALG00000002891|Novel02978|ENSGALG00000036165|ENSGALG00000010628	http://www.genome.jp/kegg-bin/show_pathway?gga01212/gga:421995%09red/gga:430557%09red/gga:424005%09red/gga:422547%09red
Pyrimidine metabolism	KEGG PATHWAY	gga00240	12	90	0.0577888	0.268844	ENSGALG00000005961|ENSGALG00000039384|ENSGALG00000006040|ENSGALG00000016442|ENSGALG00000016524|ENSGALG00000031397|ENSGALG00000010674|ENSGALG00000037671|ENSGALG00000041028|ENSGALG00000014897|ENSGALG00000007665|ENSGALG00000007191	http://www.genome.jp/kegg-bin/show_pathway?gga00240/gga:422556%09red/gga:428659%09red/gga:395080%09red/gga:395719%09red/gga:418114%09red/gga:421936%09red/gga:420266%09red/gga:416997%09red/gga:421060%09red/gga:770922%09red/gga:419255%09red
Notch signaling pathway	KEGG PATHWAY	gga04330	7	44	0.0677866	0.302215	Novel00762|Novel01598|Novel02114|Novel01736|ENSGALG00000001141|Novel01463|Novel00220	http://www.genome.jp/kegg-bin/show_pathway?gga04330/gga:419392%09red/gga:428441%09red
Nucleotide excision repair	KEGG PATHWAY	gga03420	6	37	0.0820182	0.351038	ENSGALG00000033055|ENSGALG00000039384|Novel03083|Novel01973|Novel00200|ENSGALG00000007665	http://www.genome.jp/kegg-bin/show_pathway?gga03420/gga:416997%09red/gga:430516%09red/gga:427153%09red
Oocyte meiosis	KEGG PATHWAY	gga04114	11	88	0.0926953	0.370579	ENSGALG00000006110|ENSGALG00000003085|Novel02824|ENSGALG00000040794|ENSGALG00000009971|ENSGALG00000008233|ENSGALG00000011281|ENSGALG00000002150|ENSGALG00000007768|ENSGALG00000012755|ENSGALG00000004161	http://www.genome.jp/kegg-bin/show_pathway?gga04114/gga:396252%09red/gga:424563%09red/gga:420231%09red/gga:418090%09red/gga:420650%09red/gga:428167%09red/gga:416575%09red/gga:415326%09red/gga:415400%09red/gga:421226%09red
Fanconi anemia pathway	KEGG PATHWAY	gga03460	7	48	0.0935107	0.370579	ENSGALG00000030313|ENSGALG00000016569|ENSGALG00000003660|ENSGALG00000002781|ENSGALG00000006658|ENSGALG00000000516|ENSGALG00000024481	http://www.genome.jp/kegg-bin/show_pathway?gga03460/gga:101750641%09red/gga:415854%09red/gga:418628%09red/gga:415491%09red/gga:373983%09red/gga:771417%09red/gga:396086%09red
Pentose phosphate pathway	KEGG PATHWAY	gga00030	4	21	0.0977574	0.373573	Novel02501|ENSGALG00000012612|ENSGALG00000041352|ENSGALG00000033271	http://www.genome.jp/kegg-bin/show_pathway?gga00030/gga:374064%09red/gga:395492%09red/gga:395217%09red
Glycolysis / Gluconeogenesis	KEGG PATHWAY	gga00010	7	50	0.108153	0.385747	ENSGALG00000041352|ENSGALG00000033271|ENSGALG00000001992|ENSGALG00000031403|ENSGALG00000016430|ENSGALG00000012612|Novel02501	http://www.genome.jp/kegg-bin/show_pathway?gga00010/gga:395492%09red/gga:395217%09red/gga:396456%09red/gga:374064%09red/gga:418610%09red/gga:396016%09red
Arginine and proline metabolism	KEGG PATHWAY	gga00330	7	50	0.108153	0.385747	ENSGALG00000042030|ENSGALG00000007484|ENSGALG00000015602|Novel02761|ENSGALG00000002944|ENSGALG00000023435|ENSGALG00000034655	http://www.genome.jp/kegg-bin/show_pathway?gga00330/gga:423976%09red/gga:428994%09red/gga:419057%09red/gga:396507%09red/gga:395504%09red/gga:396261%09red/gga:396508%09red
Butanoate metabolism	KEGG PATHWAY	gga00650	4	23	0.121562	0.419586	ENSGALG00000042446|Novel03258|ENSGALG00000006947|ENSGALG00000029827	http://www.genome.jp/kegg-bin/show_pathway?gga00650/gga:422715%09red/gga:426992%09red/gga:426991%09red/gga:424891%09red
Glyoxylate and dicarboxylate metabolism	KEGG PATHWAY	gga00630	4	25	0.147569	0.493435	ENSGALG00000001949|ENSGALG00000008858|ENSGALG00000030466|ENSGALG00000011950	http://www.genome.jp/kegg-bin/show_pathway?gga00630/gga:374009%09red/gga:417517%09red/gga:100858903%09red/gga:421281%09red
Starch and sucrose metabolism	KEGG PATHWAY	gga00500	5	35	0.152217	0.493552	Novel02864|ENSGALG00000008855|Novel02689|ENSGALG00000039623|ENSGALG00000038740	http://www.genome.jp/kegg-bin/show_pathway?gga00500/gga:414140%09red/gga:421248%09red/gga:378909%09red/gga:373900%09red
Drug metabolism - other enzymes	KEGG PATHWAY	gga00983	4	27	0.175497	0.552301	ENSGALG00000008701|ENSGALG00000041028|ENSGALG00000007191|ENSGALG00000006040	http://www.genome.jp/kegg-bin/show_pathway?gga00983/gga:396025%09red/gga:420266%09red/gga:395719%09red/gga:419255%09red
Synthesis and degradation of ketone bodies	KEGG PATHWAY	gga00072	2	9	0.181786	0.555746	ENSGALG00000006947|Novel03258	http://www.genome.jp/kegg-bin/show_pathway?gga00072/gga:422715%09red/gga:424891%09red
Base excision repair	KEGG PATHWAY	gga03410	4	28	0.190088	0.564985	ENSGALG00000039384|ENSGALG00000010719|ENSGALG00000007665|Novel03083	http://www.genome.jp/kegg-bin/show_pathway?gga03410/gga:416997%09red/gga:430516%09red/gga:428750%09red
Insulin signaling pathway	KEGG PATHWAY	gga04910	12	118	0.213862	0.618466	Novel02689|ENSGALG00000005043|ENSGALG00000038427|ENSGALG00000004801|ENSGALG00000039623|Novel02864|ENSGALG00000016518|ENSGALG00000002485|ENSGALG00000012612|Novel02978|ENSGALG00000036165|ENSGALG00000006670	http://www.genome.jp/kegg-bin/show_pathway?gga04910/gga:421248%09red/gga:417543%09red/gga:395217%09red/gga:422181%09red/gga:430557%09red/gga:418612%09red/gga:378909%09red/gga:425328%09red
Nicotinate and nicotinamide metabolism	KEGG PATHWAY	gga00760	3	25	0.320965	0.903769	ENSGALG00000031397|ENSGALG00000014869|ENSGALG00000026187	http://www.genome.jp/kegg-bin/show_pathway?gga00760/gga:427196%09red/gga:395080%09red/gga:424820%09red
Phenylalanine metabolism	KEGG PATHWAY	gga00360	2	15	0.343557	0.911691	ENSGALG00000007484|ENSGALG00000013094	http://www.genome.jp/kegg-bin/show_pathway?gga00360/gga:420947%09red/gga:396261%09red
Progesterone-mediated oocyte maturation	KEGG PATHWAY	gga04914	7	74	0.353986	0.911691	ENSGALG00000003085|ENSGALG00000012755|ENSGALG00000008233|ENSGALG00000002150|ENSGALG00000025810|ENSGALG00000006110|ENSGALG00000004161	http://www.genome.jp/kegg-bin/show_pathway?gga04914/gga:396252%09red/gga:418090%09red/gga:416575%09red/gga:415326%09red/gga:415400%09red/gga:396167%09red/gga:421226%09red
Phenylalanine, tyrosine and tryptophan biosynthesis	KEGG PATHWAY	gga00400	1	5	0.35786	0.911691	ENSGALG00000007484	http://www.genome.jp/kegg-bin/show_pathway?gga00400/gga:396261%09red
Caffeine metabolism	KEGG PATHWAY	gga00232	1	5	0.35786	0.911691	ENSGALG00000008701	http://www.genome.jp/kegg-bin/show_pathway?gga00232/gga:396025%09red
Nitrogen metabolism	KEGG PATHWAY	gga00910	2	17	0.396011	0.985423	ENSGALG00000002944|ENSGALG00000033428	http://www.genome.jp/kegg-bin/show_pathway?gga00910/gga:100858989%09red/gga:428994%09red
Dorso-ventral axis formation	KEGG PATHWAY	gga04320	2	19	0.446451	0.996722	ENSGALG00000031427|ENSGALG00000002150	http://www.genome.jp/kegg-bin/show_pathway?gga04320/gga:415326%09red/gga:775973%09red
Focal adhesion	KEGG PATHWAY	gga04510	15	184	0.447032	0.996722	ENSGALG00000009641|ENSGALG00000003923|ENSGALG00000012755|ENSGALG00000041555|ENSGALG00000029182|ENSGALG00000014804|ENSGALG00000006273|ENSGALG00000017272|ENSGALG00000007917|ENSGALG00000011200|ENSGALG00000012845|ENSGALG00000033420|ENSGALG00000033315|ENSGALG00000005180|ENSGALG00000032023	http://www.genome.jp/kegg-bin/show_pathway?gga04510/gga:374046%09red/gga:396243%09red/gga:396548%09red/gga:418090%09red/gga:396306%09red/gga:420893%09red/gga:396340%09red/gga:396356%09red/gga:395069%09red/gga:419031%09red/gga:396076%09red/gga:414837%09red
FoxO signaling pathway	KEGG PATHWAY	gga04068	10	121	0.456468	0.996722	ENSGALG00000025810|ENSGALG00000012755|ENSGALG00000006110|ENSGALG00000013371|ENSGALG00000010195|Novel02793|ENSGALG00000011661|ENSGALG00000041202|ENSGALG00000004161|ENSGALG00000010476	http://www.genome.jp/kegg-bin/show_pathway?gga04068/gga:422497%09red/gga:374042%09red/gga:423971%09red/gga:430495%09red/gga:418090%09red/gga:424586%09red/gga:416575%09red/gga:415400%09red/gga:396167%09red/gga:420343%09red
Galactose metabolism	KEGG PATHWAY	gga00052	3	32	0.458489	0.996722	ENSGALG00000012260|ENSGALG00000008855|ENSGALG00000033271	http://www.genome.jp/kegg-bin/show_pathway?gga00052/gga:374064%09red/gga:424294%09red/gga:373900%09red
Mismatch repair	KEGG PATHWAY	gga03430	2	20	0.470774	0.996722	ENSGALG00000010748|Novel03083	http://www.genome.jp/kegg-bin/show_pathway?gga03430/gga:421505%09red/gga:430516%09red
Fatty acid degradation	KEGG PATHWAY	gga00071	3	33	0.477285	0.996722	ENSGALG00000016555|ENSGALG00000010628|ENSGALG00000002891	http://www.genome.jp/kegg-bin/show_pathway?gga00071/gga:424005%09red/gga:421995%09red/gga:422547%09red
Histidine metabolism	KEGG PATHWAY	gga00340	2	21	0.494442	0.996722	ENSGALG00000006306|ENSGALG00000013094	http://www.genome.jp/kegg-bin/show_pathway?gga00340/gga:420947%09red/gga:416035%09red
Glycosphingolipid biosynthesis - lacto and neolacto series	KEGG PATHWAY	gga00601	2	21	0.494442	0.996722	ENSGALG00000013211|ENSGALG00000002477	http://www.genome.jp/kegg-bin/show_pathway?gga00601/gga:395860%09red/gga:769122%09red
Adipocytokine signaling pathway	KEGG PATHWAY	gga04920	5	64	0.549976	0.996722	ENSGALG00000029697|ENSGALG00000041470|ENSGALG00000008439|ENSGALG00000040822|ENSGALG00000010628	http://www.genome.jp/kegg-bin/show_pathway?gga04920/gga:396130%09red/gga:422547%09red/gga:374120%09red/gga:417730%09red
Sulfur metabolism	KEGG PATHWAY	gga00920	1	10	0.556155	0.996722	ENSGALG00000011020	http://www.genome.jp/kegg-bin/show_pathway?gga00920/gga:420624%09red
Homologous recombination	KEGG PATHWAY	gga03440	2	24	0.561262	0.996722	ENSGALG00000030313|ENSGALG00000043597	http://www.genome.jp/kegg-bin/show_pathway?gga03440/gga:396086%09red/gga:395449%09red
Tryptophan metabolism	KEGG PATHWAY	gga00380	3	39	0.582828	0.996722	ENSGALG00000001955|ENSGALG00000013094|ENSGALG00000014155	http://www.genome.jp/kegg-bin/show_pathway?gga00380/gga:420947%09red/gga:426429%09red/gga:396066%09red
Valine, leucine and isoleucine degradation	KEGG PATHWAY	gga00280	3	41	0.614864	0.996722	Novel02767|ENSGALG00000016555|ENSGALG00000036622	http://www.genome.jp/kegg-bin/show_pathway?gga00280/gga:427395%09red/gga:421995%09red/gga:419739%09red
Glycosphingolipid biosynthesis - globo series	KEGG PATHWAY	gga00603	1	12	0.617132	0.996722	ENSGALG00000013211	http://www.genome.jp/kegg-bin/show_pathway?gga00603/gga:395860%09red
Glycosphingolipid biosynthesis - ganglio series	KEGG PATHWAY	gga00604	1	13	0.644407	0.996722	ENSGALG00000013211	http://www.genome.jp/kegg-bin/show_pathway?gga00604/gga:395860%09red
MAPK signaling pathway	KEGG PATHWAY	gga04010	15	214	0.669163	0.996722	ENSGALG00000005215|ENSGALG00000012594|ENSGALG00000005332|ENSGALG00000001475|ENSGALG00000003911|ENSGALG00000037744|ENSGALG00000011419|ENSGALG00000028376|ENSGALG00000026091|ENSGALG00000005400|ENSGALG00000040360|ENSGALG00000013022|ENSGALG00000007706|Novel01775|ENSGALG00000037927	http://www.genome.jp/kegg-bin/show_pathway?gga04010/gga:416526%09red/gga:395394%09red/gga:374192%09red/gga:100859614%09red/gga:100859571%09red/gga:415996%09red/gga:425527%09red/gga:396313%09red/gga:395985%09red/gga:395642%09red/gga:395895%09red/gga:396057%09red/gga:395891%09red/gga:396157%09red
Pantothenate and CoA biosynthesis	KEGG PATHWAY	gga00770	1	14	0.669742	0.996722	ENSGALG00000041028	http://www.genome.jp/kegg-bin/show_pathway?gga00770/gga:420266%09red
Peroxisome	KEGG PATHWAY	gga04146	5	74	0.670947	0.996722	ENSGALG00000008701|ENSGALG00000006842|ENSGALG00000011661|ENSGALG00000010628|ENSGALG00000030164	http://www.genome.jp/kegg-bin/show_pathway?gga04146/gga:396025%09red/gga:422547%09red/gga:374042%09red/gga:100858352%09red/gga:419303%09red
Tyrosine metabolism	KEGG PATHWAY	gga00350	2	31	0.691642	0.996722	ENSGALG00000007484|ENSGALG00000013094	http://www.genome.jp/kegg-bin/show_pathway?gga00350/gga:420947%09red/gga:396261%09red
Primary bile acid biosynthesis	KEGG PATHWAY	gga00120	1	15	0.693274	0.996722	ENSGALG00000006842	http://www.genome.jp/kegg-bin/show_pathway?gga00120/gga:419303%09red
Purine metabolism	KEGG PATHWAY	gga00230	10	148	0.695524	0.996722	ENSGALG00000005961|ENSGALG00000039384|ENSGALG00000016442|ENSGALG00000031397|ENSGALG00000039022|ENSGALG00000037029|ENSGALG00000001992|ENSGALG00000008701|ENSGALG00000007665|ENSGALG00000041742	http://www.genome.jp/kegg-bin/show_pathway?gga00230/gga:395080%09red/gga:396456%09red/gga:769469%09red/gga:421936%09red/gga:396025%09red/gga:777528%09red/gga:416997%09red/gga:770922%09red
Ubiquitin mediated proteolysis	KEGG PATHWAY	gga04120	8	124	0.731012	0.996722	ENSGALG00000026380|ENSGALG00000009971|ENSGALG00000016739|ENSGALG00000043488|Novel01973|ENSGALG00000002781|Novel00200|ENSGALG00000033055	http://www.genome.jp/kegg-bin/show_pathway?gga04120/gga:424563%09red/gga:418682%09red/gga:427153%09red/gga:373983%09red/gga:415406%09red/gga:100859413%09red
One carbon pool by folate	KEGG PATHWAY	gga00670	1	17	0.735433	0.996722	ENSGALG00000014897	http://www.genome.jp/kegg-bin/show_pathway?gga00670/gga:421060%09red
Steroid biosynthesis	KEGG PATHWAY	gga00100	1	17	0.735433	0.996722	ENSGALG00000036915	http://www.genome.jp/kegg-bin/show_pathway?gga00100/gga:420335%09red
Glycerolipid metabolism	KEGG PATHWAY	gga00561	3	50	0.737768	0.996722	ENSGALG00000014569|ENSGALG00000016285|ENSGALG00000016456	http://www.genome.jp/kegg-bin/show_pathway?gga00561/gga:418589%09red/gga:431066%09red/gga:421945%09red
Phagosome	KEGG PATHWAY	gga04145	8	127	0.753511	0.996722	ENSGALG00000008439|ENSGALG00000012821|ENSGALG00000013056|ENSGALG00000040822|ENSGALG00000014804|ENSGALG00000011200|ENSGALG00000008444|ENSGALG00000002507	http://www.genome.jp/kegg-bin/show_pathway?gga04145/gga:420883%09red/gga:396306%09red/gga:416694%09red/gga:374267%09red/gga:425049%09red/gga:414837%09red/gga:417730%09red
Glutathione metabolism	KEGG PATHWAY	gga00480	2	36	0.76385	0.996722	ENSGALG00000016442|ENSGALG00000010633	http://www.genome.jp/kegg-bin/show_pathway?gga00480/gga:421936%09red/gga:424643%09red
Glycosaminoglycan biosynthesis - chondroitin sulfate / dermatan sulfate	KEGG PATHWAY	gga00532	1	19	0.771804	0.996722	ENSGALG00000010125	http://www.genome.jp/kegg-bin/show_pathway?gga00532/gga:422488%09red
Vascular smooth muscle contraction	KEGG PATHWAY	gga04270	6	100	0.774598	0.996722	ENSGALG00000005332|ENSGALG00000037744|ENSGALG00000006273|ENSGALG00000013022|ENSGALG00000012845|Novel01117	http://www.genome.jp/kegg-bin/show_pathway?gga04270/gga:420893%09red/gga:396356%09red/gga:395985%09red/gga:100857499%09red/gga:395895%09red/gga:395891%09red
ABC transporters	KEGG PATHWAY	gga02010	2	37	0.776398	0.996722	ENSGALG00000016896|ENSGALG00000008912	http://www.genome.jp/kegg-bin/show_pathway?gga02010/gga:418791%09red/gga:420534%09red
Neuroactive ligand-receptor interaction	KEGG PATHWAY	gga04080	17	261	0.777284	0.996722	ENSGALG00000037511|ENSGALG00000003005|ENSGALG00000005476|ENSGALG00000008733|ENSGALG00000038136|ENSGALG00000009395|ENSGALG00000034109|ENSGALG00000005223|ENSGALG00000013371|ENSGALG00000002707|ENSGALG00000042317|ENSGALG00000005258|ENSGALG00000014742|ENSGALG00000014206|ENSGALG00000040035|ENSGALG00000004418|ENSGALG00000031689	http://www.genome.jp/kegg-bin/show_pathway?gga04080/gga:395305%09red/gga:415617%09red/gga:771215%09red/gga:396138%09red/gga:430495%09red/gga:395613%09red/gga:395605%09red/gga:428967%09red/gga:431581%09red/gga:420401%09red/gga:428633%09red/gga:427623%09red/gga:420386%09red/gga:428108%09red/gga:422411%09red/gga:770511%09red/gga:427667%09red
Pentose and glucuronate interconversions	KEGG PATHWAY	gga00040	1	20	0.788072	0.996722	ENSGALG00000008855	http://www.genome.jp/kegg-bin/show_pathway?gga00040/gga:373900%09red
Fatty acid elongation	KEGG PATHWAY	gga00062	1	20	0.788072	0.996722	ENSGALG00000016555	http://www.genome.jp/kegg-bin/show_pathway?gga00062/gga:421995%09red
Ether lipid metabolism	KEGG PATHWAY	gga00565	2	39	0.799751	0.996722	ENSGALG00000010645|ENSGALG00000015219	http://www.genome.jp/kegg-bin/show_pathway?gga00565/gga:422551%09red/gga:100857837%09red
Phototransduction	KEGG PATHWAY	gga04744	1	24	0.842355	0.996722	ENSGALG00000001418	http://www.genome.jp/kegg-bin/show_pathway?gga04744/gga:419864%09red
Hedgehog signaling pathway	KEGG PATHWAY	gga04340	2	45	0.857319	0.996722	ENSGALG00000028069|ENSGALG00000000839	http://www.genome.jp/kegg-bin/show_pathway?gga04340/gga:395562%09red/gga:427856%09red
Gap junction	KEGG PATHWAY	gga04540	4	80	0.857541	0.996722	ENSGALG00000008444|ENSGALG00000013056|ENSGALG00000003085|ENSGALG00000012821	http://www.genome.jp/kegg-bin/show_pathway?gga04540/gga:396252%09red/gga:420883%09red/gga:425049%09red/gga:416694%09red
beta-Alanine metabolism	KEGG PATHWAY	gga00410	1	26	0.864042	0.996722	ENSGALG00000041028	http://www.genome.jp/kegg-bin/show_pathway?gga00410/gga:420266%09red
Wnt signaling pathway	KEGG PATHWAY	gga04310	6	119	0.888151	0.996722	ENSGALG00000003814|ENSGALG00000039209|ENSGALG00000028069|ENSGALG00000009241|ENSGALG00000000839|ENSGALG00000003473	http://www.genome.jp/kegg-bin/show_pathway?gga04310/gga:395546%09red/gga:374156%09red/gga:395237%09red/gga:417831%09red/gga:395562%09red/gga:427856%09red
mTOR signaling pathway	KEGG PATHWAY	gga04150	2	52	0.905151	0.996722	ENSGALG00000012755|ENSGALG00000039681	http://www.genome.jp/kegg-bin/show_pathway?gga04150/gga:374177%09red/gga:418090%09red
Intestinal immune network for IgA production	KEGG PATHWAY	gga04672	1	32	0.912802	0.996722	ENSGALG00000009870	http://www.genome.jp/kegg-bin/show_pathway?gga04672/gga:395258%09red
Metabolism of xenobiotics by cytochrome P450	KEGG PATHWAY	gga00980	1	32	0.912802	0.996722	ENSGALG00000010303	http://www.genome.jp/kegg-bin/show_pathway?gga00980/gga:421447%09red
Steroid hormone biosynthesis	KEGG PATHWAY	gga00140	1	35	0.930175	0.996722	ENSGALG00000039742	http://www.genome.jp/kegg-bin/show_pathway?gga00140/gga:429828%09red
GnRH signaling pathway	KEGG PATHWAY	gga04912	3	77	0.930752	0.996722	ENSGALG00000037744|ENSGALG00000005332|ENSGALG00000013022	http://www.genome.jp/kegg-bin/show_pathway?gga04912/gga:395895%09red/gga:395985%09red/gga:395891%09red
Cytokine-cytokine receptor interaction	KEGG PATHWAY	gga04060	8	165	0.932085	0.996722	ENSGALG00000009870|ENSGALG00000006346|ENSGALG00000004221|ENSGALG00000035950|ENSGALG00000021471|ENSGALG00000011734|ENSGALG00000026499|Novel00186	http://www.genome.jp/kegg-bin/show_pathway?gga04060/gga:776400%09red/gga:419067%09red/gga:419692%09red/gga:425805%09red/gga:395451%09red/gga:427620%09red/gga:395258%09red/gga:425564%09red
Glycerophospholipid metabolism	KEGG PATHWAY	gga00564	3	86	0.957411	0.996722	ENSGALG00000000557|ENSGALG00000016456|ENSGALG00000015219	http://www.genome.jp/kegg-bin/show_pathway?gga00564/gga:421945%09red/gga:426690%09red/gga:100857837%09red
Regulation of actin cytoskeleton	KEGG PATHWAY	gga04810	8	177	0.957444	0.996722	ENSGALG00000007706|Novel03034|ENSGALG00000028376|ENSGALG00000003818|ENSGALG00000031152|ENSGALG00000006273|ENSGALG00000012845|ENSGALG00000016937	http://www.genome.jp/kegg-bin/show_pathway?gga04810/gga:416246%09red/gga:395394%09red/gga:420893%09red/gga:396356%09red/gga:415591%09red/gga:396313%09red/gga:418824%09red
Adherens junction	KEGG PATHWAY	gga04520	2	68	0.964141	0.996722	Novel03034|ENSGALG00000031152	http://www.genome.jp/kegg-bin/show_pathway?gga04520/gga:415591%09red
Amino sugar and nucleotide sugar metabolism	KEGG PATHWAY	gga00520	1	44	0.964162	0.996722	ENSGALG00000008855	http://www.genome.jp/kegg-bin/show_pathway?gga00520/gga:373900%09red
Lysine degradation	KEGG PATHWAY	gga00310	1	45	0.966723	0.996722	ENSGALG00000014155	http://www.genome.jp/kegg-bin/show_pathway?gga00310/gga:426429%09red
Arachidonic acid metabolism	KEGG PATHWAY	gga00590	1	48	0.973361	0.996722	ENSGALG00000010633	http://www.genome.jp/kegg-bin/show_pathway?gga00590/gga:424643%09red
Sphingolipid metabolism	KEGG PATHWAY	gga00600	1	49	0.975265	0.996722	ENSGALG00000015151	http://www.genome.jp/kegg-bin/show_pathway?gga00600/gga:421092%09red
Endocytosis	KEGG PATHWAY	gga04144	8	192	0.977064	0.996722	ENSGALG00000006045|ENSGALG00000012975|ENSGALG00000030836|ENSGALG00000010293|ENSGALG00000043476|ENSGALG00000043488|ENSGALG00000040035|ENSGALG00000040351	http://www.genome.jp/kegg-bin/show_pathway?gga04144/gga:418146%09red/gga:424895%09red/gga:396449%09red/gga:427605%09red/gga:415406%09red/gga:427623%09red/gga:395201%09red/gga:396265%09red
Herpes simplex infection	KEGG PATHWAY	gga05168	5	143	0.983005	0.996722	ENSGALG00000009870|ENSGALG00000003085|ENSGALG00000009864|ENSGALG00000001565|ENSGALG00000011020	http://www.genome.jp/kegg-bin/show_pathway?gga05168/gga:396252%09red/gga:420624%09red/gga:417122%09red/gga:374055%09red/gga:395258%09red
RNA transport	KEGG PATHWAY	gga03013	4	129	0.987591	0.996722	ENSGALG00000034575|ENSGALG00000005843|ENSGALG00000003818|ENSGALG00000041548	http://www.genome.jp/kegg-bin/show_pathway?gga03013/gga:416246%09red/gga:395232%09red/gga:419244%09red/gga:423359%09red
Cell adhesion molecules (CAMs)	KEGG PATHWAY	gga04514	3	112	0.990344	0.996722	ENSGALG00000015463|ENSGALG00000015624|ENSGALG00000040938	http://www.genome.jp/kegg-bin/show_pathway?gga04514/gga:395565%09red/gga:768858%09red/gga:424980%09red
Melanogenesis	KEGG PATHWAY	gga04916	2	89	0.990564	0.996722	ENSGALG00000028069|ENSGALG00000000839	http://www.genome.jp/kegg-bin/show_pathway?gga04916/gga:395562%09red/gga:427856%09red
RNA degradation	KEGG PATHWAY	gga03018	1	63	0.991251	0.996722	ENSGALG00000031403	http://www.genome.jp/kegg-bin/show_pathway?gga03018/gga:396016%09red
Aminoacyl-tRNA biosynthesis	KEGG PATHWAY	gga00970	1	64	0.991877	0.996722	Novel01716	http://www.genome.jp/kegg-bin/show_pathway?gga00970/gga:418312%09red
Tight junction	KEGG PATHWAY	gga04530	3	118	0.993236	0.996722	ENSGALG00000015531|ENSGALG00000032404|ENSGALG00000015358	http://www.genome.jp/kegg-bin/show_pathway?gga04530/gga:417310%09red/gga:422858%09red/gga:395534%09red
Apoptosis	KEGG PATHWAY	gga04210	1	69	0.994398	0.996722	ENSGALG00000011020	http://www.genome.jp/kegg-bin/show_pathway?gga04210/gga:420624%09red
mRNA surveillance pathway	KEGG PATHWAY	gga03015	1	69	0.994398	0.996722	ENSGALG00000015531	http://www.genome.jp/kegg-bin/show_pathway?gga03015/gga:422858%09red
Jak-STAT signaling pathway	KEGG PATHWAY	gga04630	3	125	0.995559	0.996722	ENSGALG00000009870|ENSGALG00000004221|ENSGALG00000002260	http://www.genome.jp/kegg-bin/show_pathway?gga04630/gga:419692%09red/gga:395335%09red/gga:395258%09red
Influenza A	KEGG PATHWAY	gga05164	3	130	0.996722	0.996722	ENSGALG00000006503|ENSGALG00000003584|ENSGALG00000011020	http://www.genome.jp/kegg-bin/show_pathway?gga05164/gga:420624%09red/gga:416320%09red/gga:417420%09red

## Sheet: E16 vs 10w
#Term	Database	ID	Input number	Background number	P-Value	Corrected P-Value	Input	Hyperlink
ECM-receptor interaction	KEGG PATHWAY	gga04512	22	73	5.81281e-06	0.000656847	ENSGALG00000009641|ENSGALG00000029182|ENSGALG00000033420|Novel02884|ENSGALG00000008266|ENSGALG00000003283|ENSGALG00000042009|ENSGALG00000041555|ENSGALG00000014804|ENSGALG00000030250|ENSGALG00000043377|ENSGALG00000007917|ENSGALG00000033315|ENSGALG00000032023|ENSGALG00000008141|ENSGALG00000011200|Novel03046|ENSGALG00000019761|ENSGALG00000010928|ENSGALG00000017272|ENSGALG00000005180|ENSGALG000000307…	http://www.genome.jp/kegg-bin/show_pathway?gga04512/gga:374046%09red/gga:396243%09red/gga:396071%09red/gga:769665%09red/gga:396306%09red/gga:374058%09red/gga:420120%09red/gga:395069%09red/gga:419031%09red/gga:396340%09red/gga:416163%09red/gga:422348%09red/gga:415560%09red/gga:427508%09red/gga:396076%09red/gga:422350%09red/gga:414837%09red
Phagosome	KEGG PATHWAY	gga04145	28	127	5.00976e-05	0.00283051	ENSGALG00000016446|Novel02414|ENSGALG00000004252|ENSGALG00000008177|ENSGALG00000009722|ENSGALG00000008444|ENSGALG00000033932|ENSGALG00000000158|ENSGALG00000012119|ENSGALG00000003283|ENSGALG00000033800|ENSGALG00000029381|ENSGALG00000014804|Novel02628|ENSGALG00000011200|ENSGALG00000002507|ENSGALG00000035075|Novel03046|ENSGALG00000041380|ENSGALG00000038393|Novel00192|ENSGALG00000007511|ENSGALG000000…	http://www.genome.jp/kegg-bin/show_pathway?gga04145/gga:396306%09red/gga:374058%09red/gga:425049%09red/gga:417057%09red/gga:417050%09red/gga:417051%09red/gga:420160%09red/gga:425389%09red/gga:693256%09red/gga:100857553%09red/gga:396191%09red/gga:414837%09red/gga:374267%09red/gga:693260%09red/gga:427728%09red/gga:427721%09red/gga:427727%09red/gga:421939%09red/gga:416695%09red/gga:416694%09red/gga:…
Cell adhesion molecules (CAMs)	KEGG PATHWAY	gga04514	24	112	0.000244906	0.00922481	Novel02414|ENSGALG00000008656|ENSGALG00000040938|ENSGALG00000039609|ENSGALG00000006415|ENSGALG00000005257|ENSGALG00000033932|ENSGALG00000000158|ENSGALG00000010053|ENSGALG00000033800|ENSGALG00000038559|Novel03046|ENSGALG00000041380|ENSGALG00000038393|ENSGALG00000013748|ENSGALG00000007511|ENSGALG00000000141|ENSGALG00000014362|ENSGALG00000000162|ENSGALG00000043016|ENSGALG00000033718|ENSGALG000000021…	http://www.genome.jp/kegg-bin/show_pathway?gga04514/gga:693256%09red/gga:424105%09red/gga:772097%09red/gga:417057%09red/gga:417050%09red/gga:417051%09red/gga:425389%09red/gga:374058%09red/gga:403158%09red/gga:100857553%09red/gga:424980%09red/gga:693260%09red/gga:424568%09red/gga:424467%09red/gga:386580%09red/gga:396175%09red/gga:427944%09red/gga:101748655%09red/gga:772212%09red/gga:395485%09red/g…
Calcium signaling pathway	KEGG PATHWAY	gga04020	30	162	0.000406635	0.0114874	ENSGALG00000004801|ENSGALG00000008177|ENSGALG00000004096|ENSGALG00000040035|ENSGALG00000036638|ENSGALG00000034680|ENSGALG00000005524|ENSGALG00000013060|ENSGALG00000037744|ENSGALG00000030251|Novel00158|ENSGALG00000013022|ENSGALG00000012845|ENSGALG00000041742|ENSGALG00000034643|ENSGALG00000015203|ENSGALG00000004930|ENSGALG00000006273|ENSGALG00000016518|ENSGALG00000033510|ENSGALG00000003863|ENSGALG0…	http://www.genome.jp/kegg-bin/show_pathway?gga04020/gga:422546%09red/gga:420935%09red/gga:723973%09red/gga:428071%09red/gga:416526%09red/gga:396356%09red/gga:100858928%09red/gga:422827%09red/gga:420893%09red/gga:428209%09red/gga:777528%09red/gga:395985%09red/gga:771952%09red/gga:420328%09red/gga:395677%09red/gga:417543%09red/gga:693245%09red/gga:374001%09red/gga:396111%09red/gga:772372%09red/gga:…
Intestinal immune network for IgA production	KEGG PATHWAY	gga04672	11	32	0.00051124	0.011554	ENSGALG00000009870|Novel02414|ENSGALG00000000158|ENSGALG00000008656|ENSGALG00000000141|ENSGALG00000016852|ENSGALG00000000162|ENSGALG00000014362|ENSGALG00000038393|Novel02610|ENSGALG00000006415	http://www.genome.jp/kegg-bin/show_pathway?gga04672/gga:395485%09red/gga:417050%09red/gga:417051%09red/gga:693256%09red/gga:427944%09red/gga:424105%09red/gga:395258%09red/gga:374229%09red/gga:430189%09red
Cell cycle	KEGG PATHWAY	gga04110	22	110	0.000975177	0.0183658	ENSGALG00000003085|ENSGALG00000040794|Novel02961|ENSGALG00000025810|ENSGALG00000004161|ENSGALG00000011967|ENSGALG00000028318|ENSGALG00000006051|ENSGALG00000026137|ENSGALG00000036519|ENSGALG00000001506|ENSGALG00000015874|ENSGALG00000009971|ENSGALG00000008233|ENSGALG00000016676|ENSGALG00000006110|ENSGALG00000006037|ENSGALG00000036892|Novel02267|ENSGALG00000012546|ENSGALG00000001616|ENSGALG000000118…	http://www.genome.jp/kegg-bin/show_pathway?gga04110/gga:396252%09red/gga:421849%09red/gga:424563%09red/gga:420231%09red/gga:422043%09red/gga:395187%09red/gga:418058%09red/gga:416776%09red/gga:422675%09red/gga:396172%09red/gga:378922%09red/gga:416027%09red/gga:100857489%09red/gga:424507%09red/gga:415400%09red/gga:416158%09red/gga:378914%09red/gga:396167%09red/gga:395076%09red/gga:421226%09red/gga:…
Cardiac muscle contraction	KEGG PATHWAY	gga04260	14	60	0.00236687	0.038208	ENSGALG00000009844|ENSGALG00000005332|ENSGALG00000042581|ENSGALG00000000302|ENSGALG00000034088|ENSGALG00000003911|ENSGALG00000037744|ENSGALG00000036573|ENSGALG00000000585|ENSGALG00000040757|ENSGALG00000013022|ENSGALG00000030212|ENSGALG00000026091|ENSGALG00000015358	http://www.genome.jp/kegg-bin/show_pathway?gga04260/gga:396468%09red/gga:423298%09red/gga:396467%09red/gga:396472%09red/gga:100859614%09red/gga:416978%09red/gga:396433%09red/gga:395985%09red/gga:100859571%09red/gga:395895%09red/gga:395891%09red/gga:395534%09red
Biosynthesis of amino acids	KEGG PATHWAY	gga01230	13	59	0.0050736	0.0716646	ENSGALG00000031403|Novel02711|ENSGALG00000002944|ENSGALG00000041352|ENSGALG00000033271|ENSGALG00000001992|ENSGALG00000026077|ENSGALG00000029719|ENSGALG00000007936|ENSGALG00000002479|ENSGALG00000014442|ENSGALG00000002988|Novel02501	http://www.genome.jp/kegg-bin/show_pathway?gga01230/gga:395492%09red/gga:428994%09red/gga:396456%09red/gga:374064%09red/gga:374193%09red/gga:395833%09red/gga:396016%09red/gga:423628%09red/gga:424381%09red/gga:415746%09red
Cytokine-cytokine receptor interaction	KEGG PATHWAY	gga04060	26	165	0.00670319	0.0841623	ENSGALG00000012216|ENSGALG00000016852|ENSGALG00000032717|ENSGALG00000011222|Novel00186|ENSGALG00000006415|ENSGALG00000025881|ENSGALG00000013372|ENSGALG00000026663|ENSGALG00000026499|ENSGALG00000032260|ENSGALG00000007121|ENSGALG00000006318|Novel01276|ENSGALG00000038000|ENSGALG00000038069|ENSGALG00000016693|ENSGALG00000009870|ENSGALG00000004221|ENSGALG00000012472|ENSGALG00000001882|ENSGALG000000424…	http://www.genome.jp/kegg-bin/show_pathway?gga04060/gga:416586%09red/gga:415651%09red/gga:419424%09red/gga:395872%09red/gga:374229%09red/gga:101749221%09red/gga:395551%09red/gga:420719%09red/gga:420718%09red/gga:426054%09red/gga:419692%09red/gga:418666%09red/gga:378930%09red/gga:425564%09red/gga:424705%09red/gga:419771%09red/gga:417465%09red/gga:395294%09red/gga:396030%09red/gga:395258%09red/gga:…
Glycolysis / Gluconeogenesis	KEGG PATHWAY	gga00010	11	50	0.0096543	0.100111	ENSGALG00000011016|ENSGALG00000006300|ENSGALG00000041352|ENSGALG00000033271|ENSGALG00000001992|ENSGALG00000026077|ENSGALG00000007936|ENSGALG00000012612|ENSGALG00000014442|ENSGALG00000031403|Novel02501	http://www.genome.jp/kegg-bin/show_pathway?gga00010/gga:395492%09red/gga:395217%09red/gga:396456%09red/gga:374064%09red/gga:374193%09red/gga:395833%09red/gga:396016%09red/gga:424691%09red/gga:396221%09red
DNA replication	KEGG PATHWAY	gga03030	8	30	0.0103502	0.100111	ENSGALG00000007665|ENSGALG00000039384|Novel03083|ENSGALG00000012546|ENSGALG00000004037|Novel02961|ENSGALG00000016676|ENSGALG00000006037	http://www.genome.jp/kegg-bin/show_pathway?gga03030/gga:416027%09red/gga:423688%09red/gga:422043%09red/gga:418058%09red/gga:416997%09red/gga:430516%09red
Neuroactive ligand-receptor interaction	KEGG PATHWAY	gga04080	36	261	0.0106313	0.100111	ENSGALG00000038995|ENSGALG00000005476|ENSGALG00000008733|ENSGALG00000003005|ENSGALG00000002152|ENSGALG00000020331|ENSGALG00000015117|ENSGALG00000005258|ENSGALG00000004096|ENSGALG00000001698|ENSGALG00000004841|ENSGALG00000040035|ENSGALG00000037841|ENSGALG00000009405|ENSGALG00000001690|ENSGALG00000008365|ENSGALG00000036638|ENSGALG00000005524|ENSGALG00000001282|ENSGALG00000005223|ENSGALG00000002707|…	http://www.genome.jp/kegg-bin/show_pathway?gga04080/gga:420401%09red/gga:420979%09red/gga:431581%09red/gga:420386%09red/gga:416174%09red/gga:414890%09red/gga:414894%09red/gga:416112%09red/gga:430981%09red/gga:100858928%09red/gga:395613%09red/gga:428071%09red/gga:428209%09red/gga:771952%09red/gga:429337%09red/gga:378911%09red/gga:395677%09red/gga:396137%09red/gga:396338%09red/gga:374001%09red/gga:…
Pentose phosphate pathway	KEGG PATHWAY	gga00030	6	21	0.0195312	0.169771	ENSGALG00000011016|ENSGALG00000041352|ENSGALG00000033271|ENSGALG00000026077|ENSGALG00000012612|Novel02501	http://www.genome.jp/kegg-bin/show_pathway?gga00030/gga:374064%09red/gga:395492%09red/gga:395217%09red/gga:424691%09red
Herpes simplex infection	KEGG PATHWAY	gga05168	21	143	0.0259622	0.209552	ENSGALG00000009870|ENSGALG00000003085|Novel02414|ENSGALG00000041280|ENSGALG00000004594|ENSGALG00000014297|ENSGALG00000033800|ENSGALG00000035075|ENSGALG00000029381|ENSGALG00000000162|ENSGALG00000041380|ENSGALG00000000141|ENSGALG00000000158|ENSGALG00000038393|ENSGALG00000033718|ENSGALG00000013468|Novel02610|ENSGALG00000041192|ENSGALG00000043603|ENSGALG00000040907|ENSGALG00000033932	http://www.genome.jp/kegg-bin/show_pathway?gga05168/gga:396252%09red/gga:396330%09red/gga:417050%09red/gga:693260%09red/gga:693256%09red/gga:425389%09red/gga:417051%09red/gga:417057%09red/gga:417465%09red/gga:427728%09red/gga:100857553%09red/gga:414741%09red/gga:395258%09red/gga:422720%09red/gga:396512%09red/gga:430189%09red/gga:424185%09red/gga:427727%09red
Adrenergic signaling in cardiomyocytes	KEGG PATHWAY	gga04261	18	121	0.0338283	0.25484	ENSGALG00000009844|ENSGALG00000015531|ENSGALG00000005332|ENSGALG00000015358|ENSGALG00000000302|ENSGALG00000030251|ENSGALG00000034088|ENSGALG00000013060|ENSGALG00000037744|ENSGALG00000040035|ENSGALG00000036573|ENSGALG00000000585|ENSGALG00000040757|ENSGALG00000003911|ENSGALG00000013022|ENSGALG00000007082|ENSGALG00000026091|ENSGALG00000030212	http://www.genome.jp/kegg-bin/show_pathway?gga04261/gga:396468%09red/gga:422858%09red/gga:423298%09red/gga:396467%09red/gga:396472%09red/gga:100859614%09red/gga:420935%09red/gga:396433%09red/gga:395985%09red/gga:100859571%09red/gga:395895%09red/gga:420328%09red/gga:395891%09red/gga:378903%09red/gga:395534%09red/gga:427623%09red
Oocyte meiosis	KEGG PATHWAY	gga04114	14	88	0.0373444	0.263745	ENSGALG00000006110|ENSGALG00000003085|Novel02824|ENSGALG00000040794|ENSGALG00000013060|ENSGALG00000008233|ENSGALG00000011281|ENSGALG00000001506|ENSGALG00000030251|ENSGALG00000004161|ENSGALG00000007768|ENSGALG00000009971|ENSGALG00000011967|Novel02267	http://www.genome.jp/kegg-bin/show_pathway?gga04114/gga:396252%09red/gga:424563%09red/gga:420231%09red/gga:428167%09red/gga:395187%09red/gga:420650%09red/gga:420935%09red/gga:422675%09red/gga:420328%09red/gga:415400%09red/gga:416158%09red/gga:416575%09red/gga:421226%09red
Starch and sucrose metabolism	KEGG PATHWAY	gga00500	7	35	0.0517645	0.333974	ENSGALG00000011016|Novel02689|ENSGALG00000039623|Novel02864|ENSGALG00000038740|ENSGALG00000008855|ENSGALG00000017068	http://www.genome.jp/kegg-bin/show_pathway?gga00500/gga:418909%09red/gga:421248%09red/gga:424691%09red/gga:373900%09red/gga:414140%09red/gga:378909%09red
Focal adhesion	KEGG PATHWAY	gga04510	24	184	0.0531994	0.333974	ENSGALG00000009641|ENSGALG00000029182|ENSGALG00000000681|ENSGALG00000033420|Novel02884|ENSGALG00000008266|ENSGALG00000003283|ENSGALG00000041555|ENSGALG00000014804|ENSGALG00000019761|ENSGALG00000043377|ENSGALG00000007917|ENSGALG00000033315|ENSGALG00000032023|ENSGALG00000008141|ENSGALG00000011200|ENSGALG00000006273|ENSGALG00000012845|Novel03046|ENSGALG00000010928|ENSGALG00000012456|ENSGALG000000172…	http://www.genome.jp/kegg-bin/show_pathway?gga04510/gga:420120%09red/gga:374046%09red/gga:396243%09red/gga:396071%09red/gga:769665%09red/gga:396306%09red/gga:374058%09red/gga:396076%09red/gga:395069%09red/gga:420893%09red/gga:396340%09red/gga:396356%09red/gga:418044%09red/gga:422348%09red/gga:415560%09red/gga:419031%09red/gga:419083%09red/gga:422350%09red/gga:414837%09red
Notch signaling pathway	KEGG PATHWAY	gga04330	8	44	0.058555	0.348248	Novel00363|Novel00777|ENSGALG00000012442|Novel01736|ENSGALG00000001141|Novel01463|ENSGALG00000012075|Novel02114	http://www.genome.jp/kegg-bin/show_pathway?gga04330/gga:419392%09red/gga:428441%09red/gga:424267%09red/gga:418042%09red
Carbon metabolism	KEGG PATHWAY	gga01200	13	90	0.0759323	0.429017	ENSGALG00000031403|Novel02711|ENSGALG00000002944|ENSGALG00000041352|ENSGALG00000033271|ENSGALG00000001992|ENSGALG00000026077|ENSGALG00000029719|ENSGALG00000007936|ENSGALG00000012612|ENSGALG00000014442|ENSGALG00000002988|Novel02501	http://www.genome.jp/kegg-bin/show_pathway?gga01200/gga:395492%09red/gga:395217%09red/gga:428994%09red/gga:396456%09red/gga:374064%09red/gga:374193%09red/gga:395833%09red/gga:396016%09red/gga:424381%09red/gga:415746%09red
Fructose and mannose metabolism	KEGG PATHWAY	gga00051	6	32	0.0856076	0.44995	ENSGALG00000041352|ENSGALG00000033271|ENSGALG00000026077|ENSGALG00000032385|ENSGALG00000012612|Novel02501	http://www.genome.jp/kegg-bin/show_pathway?gga00051/gga:395217%09red/gga:374064%09red/gga:395492%09red/gga:415906%09red
Purine metabolism	KEGG PATHWAY	gga00230	19	148	0.0876008	0.44995	ENSGALG00000011016|ENSGALG00000005961|ENSGALG00000027630|ENSGALG00000039384|ENSGALG00000015141|ENSGALG00000016442|ENSGALG00000001992|ENSGALG00000013060|ENSGALG00000011094|ENSGALG00000039022|ENSGALG00000041161|ENSGALG00000037029|ENSGALG00000030251|ENSGALG00000000549|ENSGALG00000042801|ENSGALG00000008701|ENSGALG00000007665|ENSGALG00000041742|ENSGALG00000040923	http://www.genome.jp/kegg-bin/show_pathway?gga00230/gga:424700%09red/gga:424691%09red/gga:396456%09red/gga:430522%09red/gga:415859%09red/gga:769469%09red/gga:420935%09red/gga:396025%09red/gga:777528%09red/gga:416997%09red/gga:421936%09red/gga:770922%09red/gga:100859339%09red/gga:420328%09red/gga:427253%09red/gga:423871%09red
Glycine, serine and threonine metabolism	KEGG PATHWAY	gga00260	6	36	0.124225	0.58681	ENSGALG00000002988|ENSGALG00000004518|ENSGALG00000004491|ENSGALG00000002855|ENSGALG00000005363|ENSGALG00000023435	http://www.genome.jp/kegg-bin/show_pathway?gga00260/gga:417146%09red/gga:415993%09red/gga:395504%09red/gga:416370%09red/gga:416371%09red/gga:424381%09red
Pyrimidine metabolism	KEGG PATHWAY	gga00240	12	90	0.126998	0.58681	ENSGALG00000005961|ENSGALG00000039384|ENSGALG00000016442|ENSGALG00000041161|ENSGALG00000010674|ENSGALG00000028982|ENSGALG00000037671|ENSGALG00000041028|ENSGALG00000014897|ENSGALG00000042801|ENSGALG00000007665|ENSGALG00000007191	http://www.genome.jp/kegg-bin/show_pathway?gga00240/gga:421060%09red/gga:422556%09red/gga:418114%09red/gga:395719%09red/gga:421936%09red/gga:420266%09red/gga:416997%09red/gga:421921%09red/gga:770922%09red/gga:423871%09red
Vascular smooth muscle contraction	KEGG PATHWAY	gga04270	13	100	0.131125	0.58681	ENSGALG00000043591|ENSGALG00000030251|ENSGALG00000027630|ENSGALG00000005332|ENSGALG00000034970|ENSGALG00000013060|ENSGALG00000037744|ENSGALG00000006273|ENSGALG00000043401|ENSGALG00000030512|ENSGALG00000013022|ENSGALG00000012845|ENSGALG00000011889	http://www.genome.jp/kegg-bin/show_pathway?gga04270/gga:100858782%09red/gga:396356%09red/gga:423229%09red/gga:776459%09red/gga:420935%09red/gga:420893%09red/gga:423518%09red/gga:395895%09red/gga:395985%09red/gga:428871%09red/gga:100859339%09red/gga:395891%09red/gga:420328%09red
Nucleotide excision repair	KEGG PATHWAY	gga03420	6	37	0.135018	0.58681	ENSGALG00000039384|Novel03083|Novel00109|Novel01973|Novel00200|ENSGALG00000007665	http://www.genome.jp/kegg-bin/show_pathway?gga03420/gga:416997%09red/gga:430516%09red/gga:427153%09red
Progesterone-mediated oocyte maturation	KEGG PATHWAY	gga04914	10	74	0.145898	0.610612	ENSGALG00000003085|ENSGALG00000010175|ENSGALG00000013060|ENSGALG00000008233|ENSGALG00000006110|ENSGALG00000030251|ENSGALG00000025810|ENSGALG00000011881|ENSGALG00000004161|ENSGALG00000011967	http://www.genome.jp/kegg-bin/show_pathway?gga04914/gga:396252%09red/gga:420935%09red/gga:422675%09red/gga:396172%09red/gga:416575%09red/gga:420328%09red/gga:396188%09red/gga:415400%09red/gga:396167%09red/gga:421226%09red
Ether lipid metabolism	KEGG PATHWAY	gga00565	6	39	0.157863	0.63709	ENSGALG00000043591|ENSGALG00000015219|ENSGALG00000043401|ENSGALG00000030512|ENSGALG00000010645|ENSGALG00000011646	http://www.genome.jp/kegg-bin/show_pathway?gga00565/gga:100858782%09red/gga:422551%09red/gga:100857837%09red/gga:423229%09red/gga:423496%09red/gga:428871%09red
Jak-STAT signaling pathway	KEGG PATHWAY	gga04630	15	125	0.1691	0.658908	ENSGALG00000009870|ENSGALG00000006318|ENSGALG00000004221|ENSGALG00000025881|ENSGALG00000033087|ENSGALG00000012472|ENSGALG00000013372|Novel02610|ENSGALG00000037413|ENSGALG00000032260|ENSGALG00000011222|ENSGALG00000016693|Novel01276|ENSGALG00000033234|ENSGALG00000042471	http://www.genome.jp/kegg-bin/show_pathway?gga04630/gga:416586%09red/gga:420193%09red/gga:101749221%09red/gga:424705%09red/gga:419771%09red/gga:100859707%09red/gga:426054%09red/gga:395294%09red/gga:419692%09red/gga:418666%09red/gga:395258%09red/gga:768406%09red/gga:771315%09red/gga:395845%09red
Alanine, aspartate and glutamate metabolism	KEGG PATHWAY	gga00250	5	32	0.180917	0.674059	ENSGALG00000040436|ENSGALG00000029719|ENSGALG00000002944|Novel02711|ENSGALG00000032113	http://www.genome.jp/kegg-bin/show_pathway?gga00250/gga:422893%09red/gga:395395%09red/gga:428994%09red/gga:415746%09red
Homologous recombination	KEGG PATHWAY	gga03440	4	24	0.191441	0.674059	ENSGALG00000030313|ENSGALG00000010356|ENSGALG00000039171|ENSGALG00000043597	http://www.genome.jp/kegg-bin/show_pathway?gga03440/gga:396086%09red/gga:424611%09red/gga:418152%09red/gga:395449%09red
Cysteine and methionine metabolism	KEGG PATHWAY	gga00270	5	33	0.195357	0.674059	ENSGALG00000002479|ENSGALG00000006300|ENSGALG00000041461|ENSGALG00000004518|ENSGALG00000033677	http://www.genome.jp/kegg-bin/show_pathway?gga00270/gga:416371%09red/gga:419287%09red/gga:419146%09red/gga:423628%09red/gga:396221%09red
Influenza A	KEGG PATHWAY	gga05164	15	130	0.204477	0.674059	ENSGALG00000000158|Novel02414|ENSGALG00000014297|ENSGALG00000041192|ENSGALG00000000141|ENSGALG00000011715|ENSGALG00000000162|ENSGALG00000007171|ENSGALG00000016400|ENSGALG00000016142|ENSGALG00000038393|ENSGALG00000013468|ENSGALG00000003584|ENSGALG00000011668|ENSGALG00000043603	http://www.genome.jp/kegg-bin/show_pathway?gga05164/gga:396330%09red/gga:428650%09red/gga:424185%09red/gga:395313%09red/gga:417050%09red/gga:417051%09red/gga:693256%09red/gga:417420%09red/gga:417465%09red/gga:395872%09red/gga:416633%09red/gga:422720%09red/gga:430189%09red/gga:423504%09red
alpha-Linolenic acid metabolism	KEGG PATHWAY	gga00592	4	25	0.208779	0.674059	ENSGALG00000030512|ENSGALG00000043591|ENSGALG00000007178|ENSGALG00000043401	http://www.genome.jp/kegg-bin/show_pathway?gga00592/gga:100858782%09red/gga:428871%09red/gga:423122%09red/gga:423229%09red
Nicotinate and nicotinamide metabolism	KEGG PATHWAY	gga00760	4	25	0.208779	0.674059	ENSGALG00000042801|ENSGALG00000041161|ENSGALG00000026187|ENSGALG00000014508	http://www.genome.jp/kegg-bin/show_pathway?gga00760/gga:422827%09red/gga:424820%09red/gga:423871%09red
Nitrogen metabolism	KEGG PATHWAY	gga00910	3	17	0.22096	0.693569	ENSGALG00000005360|ENSGALG00000002944|ENSGALG00000033428	http://www.genome.jp/kegg-bin/show_pathway?gga00910/gga:417647%09red/gga:100858989%09red/gga:428994%09red
Base excision repair	KEGG PATHWAY	gga03410	4	28	0.263101	0.803526	ENSGALG00000007665|ENSGALG00000039384|ENSGALG00000010719|Novel03083	http://www.genome.jp/kegg-bin/show_pathway?gga03410/gga:416997%09red/gga:430516%09red/gga:428750%09red
Arginine and proline metabolism	KEGG PATHWAY	gga00330	6	50	0.306343	0.901708	ENSGALG00000042030|ENSGALG00000008177|ENSGALG00000015602|ENSGALG00000002944|ENSGALG00000023435|Novel02761	http://www.genome.jp/kegg-bin/show_pathway?gga00330/gga:428994%09red/gga:419057%09red/gga:396507%09red/gga:395504%09red/gga:427721%09red/gga:396508%09red
Histidine metabolism	KEGG PATHWAY	gga00340	3	21	0.311992	0.901708	ENSGALG00000012377|ENSGALG00000006306|ENSGALG00000013094	http://www.genome.jp/kegg-bin/show_pathway?gga00340/gga:420947%09red/gga:416035%09red/gga:424298%09red
p53 signaling pathway	KEGG PATHWAY	gga04115	7	61	0.319189	0.901708	ENSGALG00000003085|ENSGALG00000028318|ENSGALG00000016442|ENSGALG00000040794|ENSGALG00000025810|ENSGALG00000004161|ENSGALG00000004897	http://www.genome.jp/kegg-bin/show_pathway?gga04115/gga:396252%09red/gga:420231%09red/gga:421936%09red/gga:425204%09red/gga:415400%09red/gga:378914%09red/gga:396167%09red
Galactose metabolism	KEGG PATHWAY	gga00052	4	32	0.338761	0.933658	ENSGALG00000012260|ENSGALG00000008855|ENSGALG00000011016|ENSGALG00000033271	http://www.genome.jp/kegg-bin/show_pathway?gga00052/gga:374064%09red/gga:424294%09red/gga:424691%09red/gga:373900%09red
2-Oxocarboxylic acid metabolism	KEGG PATHWAY	gga01210	2	13	0.349912	0.94143	ENSGALG00000029719|Novel02711	http://www.genome.jp/kegg-bin/show_pathway?gga01210/gga:415746%09red
MAPK signaling pathway	KEGG PATHWAY	gga04010	21	214	0.365976	0.958101	ENSGALG00000005215|ENSGALG00000007706|ENSGALG00000006647|ENSGALG00000030706|ENSGALG00000041280|ENSGALG00000001475|ENSGALG00000043591|ENSGALG00000037744|ENSGALG00000011715|ENSGALG00000028376|ENSGALG00000036093|ENSGALG00000043401|ENSGALG00000000681|ENSGALG00000012456|ENSGALG00000040360|ENSGALG00000003911|ENSGALG00000026091|ENSGALG00000013022|ENSGALG00000005332|ENSGALG00000007562|ENSGALG00000037927	http://www.genome.jp/kegg-bin/show_pathway?gga04010/gga:423504%09red/gga:770435%09red/gga:418044%09red/gga:416526%09red/gga:423229%09red/gga:419083%09red/gga:395394%09red/gga:374192%09red/gga:100859614%09red/gga:100859571%09red/gga:428857%09red/gga:428871%09red/gga:396313%09red/gga:395985%09red/gga:396512%09red/gga:100858193%09red/gga:770905%09red/gga:395895%09red/gga:396057%09red/gga:395891%09red
Insulin signaling pathway	KEGG PATHWAY	gga04910	12	118	0.373066	0.958101	Novel02689|ENSGALG00000010053|ENSGALG00000011360|ENSGALG00000004801|ENSGALG00000039623|Novel02864|ENSGALG00000016518|ENSGALG00000004336|ENSGALG00000012612|ENSGALG00000006670|ENSGALG00000001678|ENSGALG00000002485	http://www.genome.jp/kegg-bin/show_pathway?gga04910/gga:421248%09red/gga:417543%09red/gga:395217%09red/gga:424568%09red/gga:422181%09red/gga:418612%09red/gga:428692%09red/gga:424208%09red/gga:378909%09red/gga:425328%09red/gga:427017%09red
Steroid hormone biosynthesis	KEGG PATHWAY	gga00140	4	35	0.396082	0.97054	ENSGALG00000039742|ENSGALG00000010625|ENSGALG00000005467|ENSGALG00000028326	http://www.genome.jp/kegg-bin/show_pathway?gga00140/gga:100857283%09red/gga:429828%09red/gga:415807%09red/gga:772291%09red
Caffeine metabolism	KEGG PATHWAY	gga00232	1	5	0.400383	0.97054	ENSGALG00000008701	http://www.genome.jp/kegg-bin/show_pathway?gga00232/gga:396025%09red
FoxO signaling pathway	KEGG PATHWAY	gga04068	12	121	0.403676	0.97054	ENSGALG00000011360|ENSGALG00000028318|ENSGALG00000025810|ENSGALG00000041202|ENSGALG00000026137|ENSGALG00000010195|ENSGALG00000013372|Novel02793|ENSGALG00000006110|ENSGALG00000004161|ENSGALG00000013971|ENSGALG00000001678	http://www.genome.jp/kegg-bin/show_pathway?gga04068/gga:422497%09red/gga:424586%09red/gga:426054%09red/gga:395133%09red/gga:416575%09red/gga:424208%09red/gga:415400%09red/gga:378914%09red/gga:427017%09red/gga:396167%09red/gga:395076%09red/gga:420343%09red
ABC transporters	KEGG PATHWAY	gga02010	4	37	0.433886	0.976571	ENSGALG00000008912|ENSGALG00000029381|ENSGALG00000016896|ENSGALG00000035075	http://www.genome.jp/kegg-bin/show_pathway?gga02010/gga:418791%09red/gga:420534%09red/gga:427728%09red/gga:427727%09red
Arachidonic acid metabolism	KEGG PATHWAY	gga00590	5	48	0.438078	0.976571	ENSGALG00000030512|ENSGALG00000043591|ENSGALG00000030886|ENSGALG00000010633|ENSGALG00000043401	http://www.genome.jp/kegg-bin/show_pathway?gga00590/gga:374110%09red/gga:428871%09red/gga:100858782%09red/gga:424643%09red/gga:423229%09red
Fanconi anemia pathway	KEGG PATHWAY	gga03460	5	48	0.438078	0.976571	ENSGALG00000002781|ENSGALG00000003660|ENSGALG00000030313|ENSGALG00000024481|ENSGALG00000016569	http://www.genome.jp/kegg-bin/show_pathway?gga03460/gga:771417%09red/gga:396086%09red/gga:101750641%09red/gga:418628%09red/gga:373983%09red
Drug metabolism - other enzymes	KEGG PATHWAY	gga00983	3	27	0.44858	0.976571	ENSGALG00000008701|ENSGALG00000041028|ENSGALG00000007191	http://www.genome.jp/kegg-bin/show_pathway?gga00983/gga:396025%09red/gga:420266%09red/gga:395719%09red
Taurine and hypotaurine metabolism	KEGG PATHWAY	gga00430	1	6	0.449396	0.976571	ENSGALG00000040436	http://www.genome.jp/kegg-bin/show_pathway?gga00430/gga:395395%09red
Linoleic acid metabolism	KEGG PATHWAY	gga00591	3	28	0.470428	0.999969	ENSGALG00000030512|ENSGALG00000043591|ENSGALG00000043401	http://www.genome.jp/kegg-bin/show_pathway?gga00591/gga:100858782%09red/gga:428871%09red/gga:423229%09red
Glycerophospholipid metabolism	KEGG PATHWAY	gga00564	8	86	0.506013	0.999969	ENSGALG00000043591|ENSGALG00000015219|ENSGALG00000016456|ENSGALG00000043401|ENSGALG00000030512|ENSGALG00000011646|ENSGALG00000000557|ENSGALG00000028928	http://www.genome.jp/kegg-bin/show_pathway?gga00564/gga:100858782%09red/gga:426690%09red/gga:100857837%09red/gga:423229%09red/gga:396136%09red/gga:423496%09red/gga:428871%09red/gga:421945%09red
Regulation of actin cytoskeleton	KEGG PATHWAY	gga04810	16	177	0.51391	0.999969	Novel02884|ENSGALG00000008365|Novel03034|ENSGALG00000006273|ENSGALG00000020386|ENSGALG00000007511|ENSGALG00000007706|ENSGALG00000028376|ENSGALG00000016937|ENSGALG00000000681|ENSGALG00000012456|ENSGALG00000031152|ENSGALG00000001446|Novel03046|ENSGALG00000012845|ENSGALG00000007562	http://www.genome.jp/kegg-bin/show_pathway?gga04810/gga:415560%09red/gga:374058%09red/gga:419083%09red/gga:395394%09red/gga:420893%09red/gga:396356%09red/gga:415591%09red/gga:772372%09red/gga:418044%09red/gga:396313%09red/gga:423195%09red/gga:418824%09red/gga:428857%09red/gga:395774%09red/gga:396181%09red
Retinol metabolism	KEGG PATHWAY	gga00830	3	31	0.533423	0.999969	ENSGALG00000005408|ENSGALG00000010873|ENSGALG00000015147	http://www.genome.jp/kegg-bin/show_pathway?gga00830/gga:395264%09red/gga:424169%09red/gga:395346%09red
GnRH signaling pathway	KEGG PATHWAY	gga04912	7	77	0.535655	0.999969	ENSGALG00000005332|ENSGALG00000043591|ENSGALG00000037744|ENSGALG00000013022|ENSGALG00000043401|ENSGALG00000030251|ENSGALG00000013060	http://www.genome.jp/kegg-bin/show_pathway?gga04912/gga:423229%09red/gga:420935%09red/gga:395985%09red/gga:428871%09red/gga:395895%09red/gga:395891%09red/gga:420328%09red
Pentose and glucuronate interconversions	KEGG PATHWAY	gga00040	2	20	0.546704	0.999969	ENSGALG00000008855|ENSGALG00000017068	http://www.genome.jp/kegg-bin/show_pathway?gga00040/gga:418909%09red/gga:373900%09red
Mismatch repair	KEGG PATHWAY	gga03430	2	20	0.546704	0.999969	ENSGALG00000010748|Novel03083	http://www.genome.jp/kegg-bin/show_pathway?gga03430/gga:421505%09red/gga:430516%09red
RIG-I-like receptor signaling pathway	KEGG PATHWAY	gga04622	5	55	0.549403	0.999969	ENSGALG00000014297|Novel01920|ENSGALG00000041192|ENSGALG00000011668|ENSGALG00000023821	http://www.genome.jp/kegg-bin/show_pathway?gga04622/gga:396330%09red/gga:424185%09red/gga:424081%09red/gga:100858653%09red/gga:395872%09red
Adherens junction	KEGG PATHWAY	gga04520	6	68	0.569268	0.999969	ENSGALG00000010053|Novel03034|ENSGALG00000008763|ENSGALG00000010049|ENSGALG00000031152|ENSGALG00000012456	http://www.genome.jp/kegg-bin/show_pathway?gga04520/gga:424568%09red/gga:424532%09red/gga:418044%09red/gga:415591%09red/gga:417853%09red
Synthesis and degradation of ketone bodies	KEGG PATHWAY	gga00072	1	9	0.573701	0.999969	Novel03258	http://www.genome.jp/kegg-bin/show_pathway?gga00072/gga:422715%09red
Pyruvate metabolism	KEGG PATHWAY	gga00620	3	34	0.59196	0.999969	ENSGALG00000005398|ENSGALG00000001992|ENSGALG00000006300	http://www.genome.jp/kegg-bin/show_pathway?gga00620/gga:416537%09red/gga:396221%09red/gga:396456%09red
Toll-like receptor signaling pathway	KEGG PATHWAY	gga04620	7	83	0.610328	0.999969	ENSGALG00000041280|ENSGALG00000014297|ENSGALG00000014362|ENSGALG00000032717|ENSGALG00000013468|ENSGALG00000011668|ENSGALG00000043603	http://www.genome.jp/kegg-bin/show_pathway?gga04620/gga:396330%09red/gga:395551%09red/gga:417465%09red/gga:395872%09red/gga:396512%09red/gga:427944%09red/gga:422720%09red
Butanoate metabolism	KEGG PATHWAY	gga00650	2	23	0.617408	0.999969	ENSGALG00000040436|Novel03258	http://www.genome.jp/kegg-bin/show_pathway?gga00650/gga:422715%09red/gga:395395%09red
Endocytosis	KEGG PATHWAY	gga04144	16	192	0.637425	0.999969	ENSGALG00000012975|ENSGALG00000033800|ENSGALG00000011715|ENSGALG00000043488|ENSGALG00000041380|ENSGALG00000042471|ENSGALG00000012454|ENSGALG00000033718|Novel02628|ENSGALG00000040035|ENSGALG00000011041|ENSGALG00000040351|ENSGALG00000012472|ENSGALG00000040907|ENSGALG00000033510|ENSGALG00000033932	http://www.genome.jp/kegg-bin/show_pathway?gga04144/gga:417057%09red/gga:418146%09red/gga:693260%09red/gga:693245%09red/gga:424698%09red/gga:100859707%09red/gga:424895%09red/gga:418043%09red/gga:415406%09red/gga:100857553%09red/gga:427623%09red/gga:395294%09red/gga:423504%09red/gga:396191%09red/gga:425389%09red
beta-Alanine metabolism	KEGG PATHWAY	gga00410	2	26	0.67932	0.999969	ENSGALG00000040436|ENSGALG00000041028	http://www.genome.jp/kegg-bin/show_pathway?gga00410/gga:420266%09red/gga:395395%09red
Cytosolic DNA-sensing pathway	KEGG PATHWAY	gga04623	3	40	0.693919	0.999969	ENSGALG00000014297|ENSGALG00000032717|ENSGALG00000043603	http://www.genome.jp/kegg-bin/show_pathway?gga04623/gga:396330%09red/gga:417465%09red/gga:395551%09red
NOD-like receptor signaling pathway	KEGG PATHWAY	gga04621	3	41	0.708896	0.999969	ENSGALG00000043603|ENSGALG00000011668|ENSGALG00000010175	http://www.genome.jp/kegg-bin/show_pathway?gga04621/gga:395872%09red/gga:417465%09red/gga:396188%09red
Gap junction	KEGG PATHWAY	gga04540	6	80	0.714563	0.999969	ENSGALG00000003085|ENSGALG00000013060|ENSGALG00000013056|ENSGALG00000030251|Novel00192|ENSGALG00000008444	http://www.genome.jp/kegg-bin/show_pathway?gga04540/gga:396252%09red/gga:416695%09red/gga:416694%09red/gga:420935%09red/gga:425049%09red/gga:420328%09red
Tight junction	KEGG PATHWAY	gga04530	9	118	0.719845	0.999969	ENSGALG00000000920|ENSGALG00000015358|ENSGALG00000037864|ENSGALG00000034970|ENSGALG00000029660|ENSGALG00000039682|ENSGALG00000015531|ENSGALG00000011889|ENSGALG00000029606	http://www.genome.jp/kegg-bin/show_pathway?gga04530/gga:422858%09red/gga:768487%09red/gga:417309%09red/gga:423518%09red/gga:427788%09red/gga:776459%09red/gga:425665%09red/gga:426867%09red/gga:395534%09red
Pantothenate and CoA biosynthesis	KEGG PATHWAY	gga00770	1	14	0.721753	0.999969	ENSGALG00000041028	http://www.genome.jp/kegg-bin/show_pathway?gga00770/gga:420266%09red
Phenylalanine metabolism	KEGG PATHWAY	gga00360	1	15	0.744516	0.999969	ENSGALG00000013094	http://www.genome.jp/kegg-bin/show_pathway?gga00360/gga:420947%09red
One carbon pool by folate	KEGG PATHWAY	gga00670	1	17	0.784615	0.999969	ENSGALG00000014897	http://www.genome.jp/kegg-bin/show_pathway?gga00670/gga:421060%09red
Other glycan degradation	KEGG PATHWAY	gga00511	1	18	0.802241	0.999969	ENSGALG00000037467	http://www.genome.jp/kegg-bin/show_pathway?gga00511/gga:768823%09red
Adipocytokine signaling pathway	KEGG PATHWAY	gga04920	4	64	0.817283	0.999969	ENSGALG00000034970|ENSGALG00000029697|ENSGALG00000001678|ENSGALG00000011360	http://www.genome.jp/kegg-bin/show_pathway?gga04920/gga:427017%09red/gga:396130%09red/gga:424208%09red/gga:776459%09red
Dorso-ventral axis formation	KEGG PATHWAY	gga04320	1	19	0.818426	0.999969	ENSGALG00000031427	http://www.genome.jp/kegg-bin/show_pathway?gga04320/gga:775973%09red
Glutathione metabolism	KEGG PATHWAY	gga00480	2	36	0.828704	0.999969	ENSGALG00000016442|ENSGALG00000010633	http://www.genome.jp/kegg-bin/show_pathway?gga00480/gga:421936%09red/gga:424643%09red
Biosynthesis of unsaturated fatty acids	KEGG PATHWAY	gga01040	1	20	0.833288	0.999969	ENSGALG00000007178	http://www.genome.jp/kegg-bin/show_pathway?gga01040/gga:423122%09red
Salmonella infection	KEGG PATHWAY	gga05132	4	66	0.834481	0.999969	ENSGALG00000032717|ENSGALG00000011668|ENSGALG00000041280|ENSGALG00000009722	http://www.genome.jp/kegg-bin/show_pathway?gga05132/gga:395551%09red/gga:420571%09red/gga:396512%09red/gga:395872%09red
Tryptophan metabolism	KEGG PATHWAY	gga00380	2	39	0.859367	0.999969	ENSGALG00000001955|ENSGALG00000013094	http://www.genome.jp/kegg-bin/show_pathway?gga00380/gga:420947%09red/gga:396066%09red
VEGF signaling pathway	KEGG PATHWAY	gga04370	3	56	0.871093	0.999969	ENSGALG00000043591|ENSGALG00000012456|ENSGALG00000043401	http://www.genome.jp/kegg-bin/show_pathway?gga04370/gga:418044%09red/gga:428871%09red/gga:423229%09red
Propanoate metabolism	KEGG PATHWAY	gga00640	1	25	0.891238	0.999969	ENSGALG00000006300	http://www.genome.jp/kegg-bin/show_pathway?gga00640/gga:396221%09red
Amino sugar and nucleotide sugar metabolism	KEGG PATHWAY	gga00520	2	44	0.899507	0.999969	ENSGALG00000011016|ENSGALG00000008855	http://www.genome.jp/kegg-bin/show_pathway?gga00520/gga:424691%09red/gga:373900%09red
Mucin type O-Glycan biosynthesis	KEGG PATHWAY	gga00512	1	26	0.900146	0.999969	ENSGALG00000014944	http://www.genome.jp/kegg-bin/show_pathway?gga00512/gga:427207%09red
ErbB signaling pathway	KEGG PATHWAY	gga04012	4	77	0.906523	0.999969	ENSGALG00000000681|ENSGALG00000033510|ENSGALG00000028318|ENSGALG00000015422	http://www.genome.jp/kegg-bin/show_pathway?gga04012/gga:693245%09red/gga:378914%09red/gga:419083%09red/gga:373906%09red
Ubiquitin mediated proteolysis	KEGG PATHWAY	gga04120	7	124	0.918753	0.999969	ENSGALG00000026380|ENSGALG00000009971|ENSGALG00000043488|Novel01973|Novel00109|ENSGALG00000002781|Novel00200	http://www.genome.jp/kegg-bin/show_pathway?gga04120/gga:415406%09red/gga:424563%09red/gga:100859413%09red/gga:373983%09red/gga:427153%09red
Other types of O-glycan biosynthesis	KEGG PATHWAY	gga00514	1	29	0.922729	0.999969	ENSGALG00000012442	http://www.genome.jp/kegg-bin/show_pathway?gga00514/gga:418042%09red
Glycerolipid metabolism	KEGG PATHWAY	gga00561	2	50	0.933545	0.999969	ENSGALG00000014569|ENSGALG00000016456	http://www.genome.jp/kegg-bin/show_pathway?gga00561/gga:431066%09red/gga:421945%09red
Regulation of autophagy	KEGG PATHWAY	gga04140	1	31	0.934873	0.999969	ENSGALG00000002403	http://www.genome.jp/kegg-bin/show_pathway?gga04140/gga:416800%09red
Tyrosine metabolism	KEGG PATHWAY	gga00350	1	31	0.934873	0.999969	ENSGALG00000013094	http://www.genome.jp/kegg-bin/show_pathway?gga00350/gga:420947%09red
mTOR signaling pathway	KEGG PATHWAY	gga04150	2	52	0.942228	0.999969	ENSGALG00000002403|ENSGALG00000039681	http://www.genome.jp/kegg-bin/show_pathway?gga04150/gga:374177%09red/gga:416800%09red
PPAR signaling pathway	KEGG PATHWAY	gga03320	2	59	0.964867	0.999969	ENSGALG00000000619|ENSGALG00000007178	http://www.genome.jp/kegg-bin/show_pathway?gga03320/gga:423122%09red/gga:769087%09red
RNA degradation	KEGG PATHWAY	gga03018	2	63	0.973679	0.999969	ENSGALG00000026858|ENSGALG00000031403	http://www.genome.jp/kegg-bin/show_pathway?gga03018/gga:419932%09red/gga:396016%09red
Fatty acid metabolism	KEGG PATHWAY	gga01212	1	42	0.974584	0.999969	ENSGALG00000007178	http://www.genome.jp/kegg-bin/show_pathway?gga01212/gga:423122%09red
Metabolic pathways	KEGG PATHWAY	gga01100	75	1049	0.979336	0.999969	ENSGALG00000005961|Novel03258|ENSGALG00000012612|ENSGALG00000016442|ENSGALG00000033271|ENSGALG00000043591|ENSGALG00000006306|ENSGALG00000002855|ENSGALG00000008177|ENSGALG00000016446|ENSGALG00000014569|ENSGALG00000042801|ENSGALG00000014897|ENSGALG00000038740|ENSGALG00000014442|ENSGALG00000008701|ENSGALG00000007665|ENSGALG00000007191|ENSGALG00000005467|ENSGALG00000010873|ENSGALG00000002207|ENSGALG0…	http://www.genome.jp/kegg-bin/show_pathway?gga01100/gga:395217%09red/gga:415859%09red/gga:427207%09red/gga:428994%09red/gga:396456%09red/gga:100857837%09red/gga:422893%09red/gga:428871%09red/gga:415807%09red/gga:424381%09red/gga:416978%09red/gga:396025%09red/gga:420266%09red/gga:378909%09red/gga:424169%09red/gga:770922%09red/gga:423229%09red/gga:419287%09red/gga:427721%09red/gga:415746%09red/gga:…
Apoptosis	KEGG PATHWAY	gga04210	2	69	0.983022	0.999969	Novel01920|ENSGALG00000025881	http://www.genome.jp/kegg-bin/show_pathway?gga04210/gga:771315%09red/gga:424081%09red
TGF-beta signaling pathway	KEGG PATHWAY	gga04350	2	69	0.983022	0.999969	ENSGALG00000026137|ENSGALG00000012216	http://www.genome.jp/kegg-bin/show_pathway?gga04350/gga:395076%09red/gga:396030%09red
Melanogenesis	KEGG PATHWAY	gga04916	3	89	0.983687	0.999969	ENSGALG00000030251|ENSGALG00000013060|ENSGALG00000039101	http://www.genome.jp/kegg-bin/show_pathway?gga04916/gga:420328%09red/gga:419147%09red/gga:420935%09red
Sphingolipid metabolism	KEGG PATHWAY	gga00600	1	49	0.986042	0.999969	ENSGALG00000037467	http://www.genome.jp/kegg-bin/show_pathway?gga00600/gga:768823%09red
Wnt signaling pathway	KEGG PATHWAY	gga04310	4	119	0.992292	0.999969	ENSGALG00000039209|ENSGALG00000003814|ENSGALG00000003473|ENSGALG00000012456	http://www.genome.jp/kegg-bin/show_pathway?gga04310/gga:418044%09red/gga:374156%09red/gga:417831%09red/gga:395237%09red
Inositol phosphate metabolism	KEGG PATHWAY	gga00562	1	57	0.992968	0.999969	ENSGALG00000004336	http://www.genome.jp/kegg-bin/show_pathway?gga00562/gga:428692%09red
Aminoacyl-tRNA biosynthesis	KEGG PATHWAY	gga00970	1	64	0.996142	0.999969	Novel01716	http://www.genome.jp/kegg-bin/show_pathway?gga00970/gga:418312%09red
Ribosome biogenesis in eukaryotes	KEGG PATHWAY	gga03008	1	68	0.997262	0.999969	ENSGALG00000023859	http://www.genome.jp/kegg-bin/show_pathway?gga03008/gga:430848%09red
Oxidative phosphorylation	KEGG PATHWAY	gga00190	3	115	0.99727	0.999969	ENSGALG00000002207|ENSGALG00000016446|ENSGALG00000042581	http://www.genome.jp/kegg-bin/show_pathway?gga00190/gga:424349%09red/gga:416978%09red/gga:421939%09red
mRNA surveillance pathway	KEGG PATHWAY	gga03015	1	69	0.997488	0.999969	ENSGALG00000015531	http://www.genome.jp/kegg-bin/show_pathway?gga03015/gga:422858%09red
Peroxisome	KEGG PATHWAY	gga04146	1	74	0.998364	0.999969	ENSGALG00000008701	http://www.genome.jp/kegg-bin/show_pathway?gga04146/gga:396025%09red
Phosphatidylinositol signaling system	KEGG PATHWAY	gga04070	1	75	0.998499	0.999969	ENSGALG00000004336	http://www.genome.jp/kegg-bin/show_pathway?gga04070/gga:428692%09red
Protein processing in endoplasmic reticulum	KEGG PATHWAY	gga04141	4	146	0.998698	0.999969	ENSGALG00000027506|ENSGALG00000011715|ENSGALG00000016199|ENSGALG00000010175	http://www.genome.jp/kegg-bin/show_pathway?gga04141/gga:427022%09red/gga:423504%09red/gga:396188%09red/gga:418546%09red
RNA transport	KEGG PATHWAY	gga03013	3	129	0.998996	0.999969	ENSGALG00000023859|ENSGALG00000005843|ENSGALG00000041548	http://www.genome.jp/kegg-bin/show_pathway?gga03013/gga:395232%09red/gga:419244%09red/gga:430848%09red
Lysosome	KEGG PATHWAY	gga04142	2	107	0.999051	0.999969	ENSGALG00000008759|ENSGALG00000004252	http://www.genome.jp/kegg-bin/show_pathway?gga04142/gga:420160%09red/gga:424961%09red
Spliceosome	KEGG PATHWAY	gga03040	1	105	0.999886	0.999969	ENSGALG00000011715	http://www.genome.jp/kegg-bin/show_pathway?gga03040/gga:423504%09red
Ribosome	KEGG PATHWAY	gga03010	1	120	0.999969	0.999969	ENSGALG00000005458	http://www.genome.jp/kegg-bin/show_pathway?gga03010/gga:416542%09red

## Sheet: 1d vs 10w
#Term	Database	ID	Input number	Background number	P-Value	Corrected P-Value	Input	Hyperlink
Cell adhesion molecules (CAMs)	KEGG PATHWAY	gga04514	23	112	6.47278e-09	6.27859e-07	Novel02414|ENSGALG00000008656|ENSGALG00000039609|ENSGALG00000015463|ENSGALG00000006415|ENSGALG00000005257|ENSGALG00000033932|ENSGALG00000000158|ENSGALG00000033800|ENSGALG00000038559|Novel03046|ENSGALG00000019114|ENSGALG00000041380|ENSGALG00000038393|ENSGALG00000007511|ENSGALG00000000141|ENSGALG00000014362|ENSGALG00000000162|ENSGALG00000043016|ENSGALG00000033718|ENSGALG00000002192|ENSGALG000000159…	http://www.genome.jp/kegg-bin/show_pathway?gga04514/gga:417057%09red/gga:395485%09red/gga:768858%09red/gga:417050%09red/gga:693260%09red/gga:374058%09red/gga:425389%09red/gga:417051%09red/gga:386580%09red/gga:424467%09red/gga:693256%09red/gga:403158%09red/gga:424105%09red/gga:100857553%09red/gga:396175%09red/gga:772212%09red/gga:418790%09red/gga:101748655%09red/gga:430189%09red/gga:427944%09red/g…
Phagosome	KEGG PATHWAY	gga04145	19	127	9.12266e-06	0.000442449	ENSGALG00000000158|ENSGALG00000012119|Novel02414|ENSGALG00000035075|ENSGALG00000033800|ENSGALG00000007511|ENSGALG00000029381|Novel03046|ENSGALG00000008177|ENSGALG00000041380|ENSGALG00000000141|ENSGALG00000038393|ENSGALG00000000162|ENSGALG00000009626|ENSGALG00000004252|ENSGALG00000033718|ENSGALG00000008439|ENSGALG00000040907|ENSGALG00000033932	http://www.genome.jp/kegg-bin/show_pathway?gga04145/gga:417057%09red/gga:693256%09red/gga:417050%09red/gga:693260%09red/gga:373987%09red/gga:395488%09red/gga:417051%09red/gga:420160%09red/gga:374058%09red/gga:427728%09red/gga:100857553%09red/gga:427721%09red/gga:430189%09red/gga:396181%09red/gga:427727%09red/gga:425389%09red/gga:417730%09red
Intestinal immune network for IgA production	KEGG PATHWAY	gga04672	9	32	3.60233e-05	0.00116475	ENSGALG00000000158|Novel02414|ENSGALG00000008656|ENSGALG00000000141|ENSGALG00000016852|ENSGALG00000000162|ENSGALG00000014362|ENSGALG00000038393|ENSGALG00000006415	http://www.genome.jp/kegg-bin/show_pathway?gga04672/gga:417050%09red/gga:417051%09red/gga:693256%09red/gga:395485%09red/gga:424105%09red/gga:427944%09red/gga:374229%09red/gga:430189%09red
Herpes simplex infection	KEGG PATHWAY	gga05168	18	143	0.00012025	0.00291606	ENSGALG00000004594|ENSGALG00000000141|Novel02414|ENSGALG00000041280|ENSGALG00000000158|ENSGALG00000033800|ENSGALG00000041380|ENSGALG00000035075|ENSGALG00000041192|ENSGALG00000000162|ENSGALG00000029381|ENSGALG00000038393|ENSGALG00000033718|ENSGALG00000013468|ENSGALG00000040907|ENSGALG00000033932|ENSGALG00000009864|ENSGALG00000043603	http://www.genome.jp/kegg-bin/show_pathway?gga05168/gga:417057%09red/gga:417050%09red/gga:427728%09red/gga:693260%09red/gga:693256%09red/gga:425389%09red/gga:417051%09red/gga:417465%09red/gga:396512%09red/gga:100857553%09red/gga:414741%09red/gga:422720%09red/gga:430189%09red/gga:424185%09red/gga:427727%09red/gga:374055%09red
Fatty acid metabolism	KEGG PATHWAY	gga01212	9	42	0.000216509	0.00363739	ENSGALG00000005043|ENSGALG00000007178|ENSGALG00000038427|ENSGALG00000031142|ENSGALG00000016555|ENSGALG00000002891|ENSGALG00000016536|ENSGALG00000036165|ENSGALG00000010628	http://www.genome.jp/kegg-bin/show_pathway?gga01212/gga:423122%09red/gga:426847%09red/gga:422547%09red/gga:424005%09red/gga:430557%09red/gga:421995%09red/gga:395929%09red
Cytokine-cytokine receptor interaction	KEGG PATHWAY	gga04060	19	165	0.000224993	0.00363739	ENSGALG00000007121|ENSGALG00000006415|ENSGALG00000006346|ENSGALG00000006318|ENSGALG00000025881|ENSGALG00000016852|ENSGALG00000011668|ENSGALG00000012472|ENSGALG00000032717|ENSGALG00000001882|ENSGALG00000026163|ENSGALG00000038000|ENSGALG00000042471|ENSGALG00000038069|ENSGALG00000037413|ENSGALG00000016693|ENSGALG00000013372|ENSGALG00000032260|ENSGALG00000043603	http://www.genome.jp/kegg-bin/show_pathway?gga04060/gga:416586%09red/gga:420193%09red/gga:420718%09red/gga:395485%09red/gga:419771%09red/gga:395551%09red/gga:428067%09red/gga:100859707%09red/gga:419424%09red/gga:417465%09red/gga:395294%09red/gga:395872%09red/gga:418666%09red/gga:420719%09red/gga:395451%09red/gga:426054%09red/gga:378930%09red/gga:374229%09red/gga:771315%09red
Fatty acid biosynthesis	KEGG PATHWAY	gga00061	4	13	0.00453043	0.0627788	ENSGALG00000038427|ENSGALG00000005043|ENSGALG00000036165|ENSGALG00000010628	http://www.genome.jp/kegg-bin/show_pathway?gga00061/gga:430557%09red/gga:422547%09red
Influenza A	KEGG PATHWAY	gga05164	12	130	0.0149895	0.181747	ENSGALG00000000158|Novel02414|ENSGALG00000000141|ENSGALG00000041192|ENSGALG00000000162|ENSGALG00000007171|ENSGALG00000016400|ENSGALG00000016142|ENSGALG00000038393|ENSGALG00000013468|ENSGALG00000011668|ENSGALG00000043603	http://www.genome.jp/kegg-bin/show_pathway?gga05164/gga:428650%09red/gga:395313%09red/gga:417050%09red/gga:417051%09red/gga:693256%09red/gga:417465%09red/gga:395872%09red/gga:416633%09red/gga:422720%09red/gga:430189%09red/gga:424185%09red
ECM-receptor interaction	KEGG PATHWAY	gga04512	8	73	0.0188361	0.189669	ENSGALG00000008439|ENSGALG00000008266|ENSGALG00000019761|ENSGALG00000008141|ENSGALG00000009626|Novel03046|ENSGALG00000030712|ENSGALG00000033420	http://www.genome.jp/kegg-bin/show_pathway?gga04512/gga:769665%09red/gga:373987%09red/gga:395069%09red/gga:396340%09red/gga:374058%09red/gga:422348%09red/gga:422350%09red/gga:417730%09red
Fatty acid degradation	KEGG PATHWAY	gga00071	5	33	0.0195536	0.189669	ENSGALG00000016536|ENSGALG00000016555|ENSGALG00000031142|ENSGALG00000010628|ENSGALG00000002891	http://www.genome.jp/kegg-bin/show_pathway?gga00071/gga:424005%09red/gga:421995%09red/gga:395929%09red/gga:426847%09red/gga:422547%09red
Glycine, serine and threonine metabolism	KEGG PATHWAY	gga00260	5	36	0.0264005	0.232804	ENSGALG00000019175|ENSGALG00000002988|ENSGALG00000023435|ENSGALG00000016196|ENSGALG00000004491	http://www.genome.jp/kegg-bin/show_pathway?gga00260/gga:424381%09red/gga:416370%09red/gga:418545%09red/gga:418544%09red/gga:395504%09red
Propanoate metabolism	KEGG PATHWAY	gga00640	4	25	0.0305901	0.24727	ENSGALG00000038427|ENSGALG00000016536|ENSGALG00000005043|ENSGALG00000036165	http://www.genome.jp/kegg-bin/show_pathway?gga00640/gga:430557%09red/gga:395929%09red
PPAR signaling pathway	KEGG PATHWAY	gga03320	6	59	0.0521249	0.375463	ENSGALG00000008439|ENSGALG00000007178|ENSGALG00000040553|ENSGALG00000037050|ENSGALG00000002891|ENSGALG00000010628	http://www.genome.jp/kegg-bin/show_pathway?gga03320/gga:419557%09red/gga:423122%09red/gga:422547%09red/gga:424005%09red/gga:426008%09red/gga:417730%09red
Jak-STAT signaling pathway	KEGG PATHWAY	gga04630	10	125	0.0541906	0.375463	ENSGALG00000006318|ENSGALG00000025881|ENSGALG00000033087|ENSGALG00000012472|ENSGALG00000037413|ENSGALG00000032260|ENSGALG00000013372|ENSGALG00000016693|ENSGALG00000033234|ENSGALG00000042471	http://www.genome.jp/kegg-bin/show_pathway?gga04630/gga:416586%09red/gga:420193%09red/gga:419771%09red/gga:100859707%09red/gga:426054%09red/gga:395294%09red/gga:418666%09red/gga:768406%09red/gga:771315%09red/gga:395845%09red
Fatty acid elongation	KEGG PATHWAY	gga00062	3	20	0.0680341	0.432185	ENSGALG00000016536|ENSGALG00000016555|ENSGALG00000031142	http://www.genome.jp/kegg-bin/show_pathway?gga00062/gga:421995%09red/gga:395929%09red/gga:426847%09red
Pyruvate metabolism	KEGG PATHWAY	gga00620	4	34	0.0712883	0.432185	ENSGALG00000036165|ENSGALG00000005043|ENSGALG00000015849|ENSGALG00000038427	http://www.genome.jp/kegg-bin/show_pathway?gga00620/gga:430557%09red/gga:374189%09red
alpha-Linolenic acid metabolism	KEGG PATHWAY	gga00592	3	25	0.108397	0.618501	ENSGALG00000043591|ENSGALG00000007178|ENSGALG00000043401	http://www.genome.jp/kegg-bin/show_pathway?gga00592/gga:423229%09red/gga:423122%09red/gga:428871%09red
Endocytosis	KEGG PATHWAY	gga04144	12	192	0.14194	0.764898	ENSGALG00000030836|ENSGALG00000033800|ENSGALG00000012454|ENSGALG00000041380|ENSGALG00000033510|ENSGALG00000033718|ENSGALG00000042471|ENSGALG00000011041|ENSGALG00000040351|ENSGALG00000012472|ENSGALG00000040907|ENSGALG00000033932	http://www.genome.jp/kegg-bin/show_pathway?gga04144/gga:417057%09red/gga:693260%09red/gga:693245%09red/gga:424698%09red/gga:100859707%09red/gga:427605%09red/gga:424895%09red/gga:100857553%09red/gga:395294%09red/gga:418043%09red/gga:425389%09red
Toll-like receptor signaling pathway	KEGG PATHWAY	gga04620	6	83	0.164348	0.804844	ENSGALG00000041280|ENSGALG00000014362|ENSGALG00000032717|ENSGALG00000013468|ENSGALG00000011668|ENSGALG00000043603	http://www.genome.jp/kegg-bin/show_pathway?gga04620/gga:395551%09red/gga:417465%09red/gga:395872%09red/gga:396512%09red/gga:427944%09red/gga:422720%09red
Retinol metabolism	KEGG PATHWAY	gga00830	3	31	0.165947	0.804844	ENSGALG00000005408|ENSGALG00000015147|ENSGALG00000034701	http://www.genome.jp/kegg-bin/show_pathway?gga00830/gga:395264%09red/gga:776432%09red/gga:395346%09red
ABC transporters	KEGG PATHWAY	gga02010	3	37	0.230297	0.998129	ENSGALG00000010891|ENSGALG00000029381|ENSGALG00000035075	http://www.genome.jp/kegg-bin/show_pathway?gga02010/gga:424170%09red/gga:427728%09red/gga:427727%09red
Biosynthesis of unsaturated fatty acids	KEGG PATHWAY	gga01040	2	20	0.231637	0.998129	ENSGALG00000016536|ENSGALG00000007178	http://www.genome.jp/kegg-bin/show_pathway?gga01040/gga:423122%09red/gga:395929%09red
Ether lipid metabolism	KEGG PATHWAY	gga00565	3	39	0.252703	0.998129	ENSGALG00000011646|ENSGALG00000043401|ENSGALG00000043591	http://www.genome.jp/kegg-bin/show_pathway?gga00565/gga:423229%09red/gga:423496%09red/gga:428871%09red
Neuroactive ligand-receptor interaction	KEGG PATHWAY	gga04080	14	261	0.253081	0.998129	ENSGALG00000004128|ENSGALG00000013548|ENSGALG00000038136|ENSGALG00000005524|ENSGALG00000001282|ENSGALG00000001462|ENSGALG00000020331|ENSGALG00000017003|ENSGALG00000001698|ENSGALG00000014206|ENSGALG00000004418|ENSGALG00000000783|ENSGALG00000001690|ENSGALG00000003863	http://www.genome.jp/kegg-bin/show_pathway?gga04080/gga:395305%09red/gga:415617%09red/gga:373956%09red/gga:770710%09red/gga:428149%09red/gga:428072%09red/gga:422148%09red/gga:428209%09red/gga:428691%09red/gga:771952%09red/gga:414890%09red/gga:770511%09red/gga:374214%09red/gga:395108%09red
Tight junction	KEGG PATHWAY	gga04530	7	118	0.262587	0.998129	ENSGALG00000037864|ENSGALG00000034970|ENSGALG00000039682|ENSGALG00000039977|ENSGALG00000032404|ENSGALG00000029606|ENSGALG00000019114	http://www.genome.jp/kegg-bin/show_pathway?gga04530/gga:417310%09red/gga:374069%09red/gga:417309%09red/gga:427788%09red/gga:776459%09red/gga:418790%09red/gga:426867%09red
Valine, leucine and isoleucine degradation	KEGG PATHWAY	gga00280	3	41	0.275403	0.998129	ENSGALG00000016536|ENSGALG00000016555|ENSGALG00000031142	http://www.genome.jp/kegg-bin/show_pathway?gga00280/gga:421995%09red/gga:395929%09red/gga:426847%09red
Focal adhesion	KEGG PATHWAY	gga04510	10	184	0.286382	0.998129	ENSGALG00000008141|ENSGALG00000008266|ENSGALG00000012456|ENSGALG00000012755|ENSGALG00000000681|ENSGALG00000019761|ENSGALG00000009626|Novel03046|ENSGALG00000030712|ENSGALG00000033420	http://www.genome.jp/kegg-bin/show_pathway?gga04510/gga:769665%09red/gga:418090%09red/gga:373987%09red/gga:395069%09red/gga:396340%09red/gga:374058%09red/gga:418044%09red/gga:422348%09red/gga:419083%09red/gga:422350%09red
Nicotinate and nicotinamide metabolism	KEGG PATHWAY	gga00760	2	25	0.309596	0.998129	ENSGALG00000042801|ENSGALG00000041161	http://www.genome.jp/kegg-bin/show_pathway?gga00760/gga:423871%09red
Adipocytokine signaling pathway	KEGG PATHWAY	gga04920	4	64	0.312197	0.998129	ENSGALG00000034970|ENSGALG00000008439|ENSGALG00000011360|ENSGALG00000010628	http://www.genome.jp/kegg-bin/show_pathway?gga04920/gga:422547%09red/gga:417730%09red/gga:424208%09red/gga:776459%09red
Ubiquinone and other terpenoid-quinone biosynthesis	KEGG PATHWAY	gga00130	1	9	0.345742	0.998129	ENSGALG00000004343	http://www.genome.jp/kegg-bin/show_pathway?gga00130/gga:416852%09red
Linoleic acid metabolism	KEGG PATHWAY	gga00591	2	28	0.355732	0.998129	ENSGALG00000043591|ENSGALG00000043401	http://www.genome.jp/kegg-bin/show_pathway?gga00591/gga:423229%09red/gga:428871%09red
Arachidonic acid metabolism	KEGG PATHWAY	gga00590	3	48	0.355778	0.998129	ENSGALG00000005857|ENSGALG00000043591|ENSGALG00000043401	http://www.genome.jp/kegg-bin/show_pathway?gga00590/gga:423769%09red/gga:423229%09red/gga:428871%09red
Glycosphingolipid biosynthesis - globo series	KEGG PATHWAY	gga00603	1	12	0.423981	0.998129	ENSGALG00000013211	http://www.genome.jp/kegg-bin/show_pathway?gga00603/gga:395860%09red
Cysteine and methionine metabolism	KEGG PATHWAY	gga00270	2	33	0.429889	0.998129	ENSGALG00000019175|ENSGALG00000016196	http://www.genome.jp/kegg-bin/show_pathway?gga00270/gga:418545%09red/gga:418544%09red
ErbB signaling pathway	KEGG PATHWAY	gga04012	4	77	0.435519	0.998129	ENSGALG00000000681|ENSGALG00000042812|ENSGALG00000033510|ENSGALG00000015422	http://www.genome.jp/kegg-bin/show_pathway?gga04012/gga:693245%09red/gga:428937%09red/gga:419083%09red/gga:373906%09red
Vascular smooth muscle contraction	KEGG PATHWAY	gga04270	5	100	0.442824	0.998129	ENSGALG00000034970|ENSGALG00000013060|Novel01117|ENSGALG00000043401|ENSGALG00000043591	http://www.genome.jp/kegg-bin/show_pathway?gga04270/gga:428871%09red/gga:423229%09red/gga:776459%09red/gga:420935%09red/gga:100857499%09red
VEGF signaling pathway	KEGG PATHWAY	gga04370	3	56	0.445984	0.998129	ENSGALG00000043591|ENSGALG00000012456|ENSGALG00000043401	http://www.genome.jp/kegg-bin/show_pathway?gga04370/gga:418044%09red/gga:423229%09red/gga:428871%09red
Glycosphingolipid biosynthesis - ganglio series	KEGG PATHWAY	gga00604	1	13	0.447928	0.998129	ENSGALG00000013211	http://www.genome.jp/kegg-bin/show_pathway?gga00604/gga:395860%09red
Steroid hormone biosynthesis	KEGG PATHWAY	gga00140	2	35	0.458286	0.998129	ENSGALG00000010625|ENSGALG00000005467	http://www.genome.jp/kegg-bin/show_pathway?gga00140/gga:415807%09red/gga:772291%09red
Biosynthesis of amino acids	KEGG PATHWAY	gga01230	3	59	0.478573	0.998129	ENSGALG00000019175|ENSGALG00000016196|ENSGALG00000002988	http://www.genome.jp/kegg-bin/show_pathway?gga01230/gga:418545%09red/gga:418544%09red/gga:424381%09red
Phenylalanine metabolism	KEGG PATHWAY	gga00360	1	15	0.492884	0.998129	ENSGALG00000004343	http://www.genome.jp/kegg-bin/show_pathway?gga00360/gga:416852%09red
p53 signaling pathway	KEGG PATHWAY	gga04115	3	61	0.499795	0.998129	ENSGALG00000012755|ENSGALG00000033960|ENSGALG00000009626	http://www.genome.jp/kegg-bin/show_pathway?gga04115/gga:373987%09red/gga:100859755%09red/gga:418090%09red
Glycerophospholipid metabolism	KEGG PATHWAY	gga00564	4	86	0.517396	0.998129	ENSGALG00000011646|ENSGALG00000043401|ENSGALG00000023517|ENSGALG00000043591	http://www.genome.jp/kegg-bin/show_pathway?gga00564/gga:423229%09red/gga:772114%09red/gga:423496%09red/gga:428871%09red
Cytosolic DNA-sensing pathway	KEGG PATHWAY	gga04623	2	40	0.52551	0.998129	ENSGALG00000032717|ENSGALG00000043603	http://www.genome.jp/kegg-bin/show_pathway?gga04623/gga:395551%09red/gga:417465%09red
Steroid biosynthesis	KEGG PATHWAY	gga00100	1	17	0.534187	0.998129	ENSGALG00000036915	http://www.genome.jp/kegg-bin/show_pathway?gga00100/gga:420335%09red
NOD-like receptor signaling pathway	KEGG PATHWAY	gga04621	2	41	0.538266	0.998129	ENSGALG00000011668|ENSGALG00000043603	http://www.genome.jp/kegg-bin/show_pathway?gga04621/gga:395872%09red/gga:417465%09red
Salmonella infection	KEGG PATHWAY	gga05132	3	66	0.550834	0.998129	ENSGALG00000032717|ENSGALG00000011668|ENSGALG00000041280	http://www.genome.jp/kegg-bin/show_pathway?gga05132/gga:395551%09red/gga:396512%09red/gga:395872%09red
Calcium signaling pathway	KEGG PATHWAY	gga04020	7	162	0.557268	0.998129	ENSGALG00000004128|ENSGALG00000005524|ENSGALG00000013060|ENSGALG00000008177|ENSGALG00000033510|ENSGALG00000000783|ENSGALG00000003863	http://www.genome.jp/kegg-bin/show_pathway?gga04020/gga:428149%09red/gga:693245%09red/gga:420935%09red/gga:428209%09red/gga:428691%09red/gga:771952%09red/gga:427721%09red
Dorso-ventral axis formation	KEGG PATHWAY	gga04320	1	19	0.572134	0.998129	ENSGALG00000002150	http://www.genome.jp/kegg-bin/show_pathway?gga04320/gga:415326%09red
Notch signaling pathway	KEGG PATHWAY	gga04330	2	44	0.575095	0.998129	ENSGALG00000012442|ENSGALG00000012075	http://www.genome.jp/kegg-bin/show_pathway?gga04330/gga:424267%09red/gga:418042%09red
Insulin signaling pathway	KEGG PATHWAY	gga04910	5	118	0.583255	0.998129	ENSGALG00000036165|ENSGALG00000004336|ENSGALG00000011360|ENSGALG00000038427|ENSGALG00000005043	http://www.genome.jp/kegg-bin/show_pathway?gga04910/gga:430557%09red/gga:428692%09red/gga:424208%09red
Pentose and glucuronate interconversions	KEGG PATHWAY	gga00040	1	20	0.589935	0.998129	ENSGALG00000017068	http://www.genome.jp/kegg-bin/show_pathway?gga00040/gga:418909%09red
Glycosphingolipid biosynthesis - lacto and neolacto series	KEGG PATHWAY	gga00601	1	21	0.606996	0.998129	ENSGALG00000013211	http://www.genome.jp/kegg-bin/show_pathway?gga00601/gga:395860%09red
Progesterone-mediated oocyte maturation	KEGG PATHWAY	gga04914	3	74	0.625733	0.998129	ENSGALG00000012755|ENSGALG00000002150|ENSGALG00000013060	http://www.genome.jp/kegg-bin/show_pathway?gga04914/gga:415326%09red/gga:420935%09red/gga:418090%09red
Sphingolipid metabolism	KEGG PATHWAY	gga00600	2	49	0.631615	0.998129	ENSGALG00000034950|ENSGALG00000010535	http://www.genome.jp/kegg-bin/show_pathway?gga00600/gga:422529%09red/gga:415619%09red
Butanoate metabolism	KEGG PATHWAY	gga00650	1	23	0.639025	0.998129	ENSGALG00000016536	http://www.genome.jp/kegg-bin/show_pathway?gga00650/gga:395929%09red
Arginine and proline metabolism	KEGG PATHWAY	gga00330	2	50	0.64219	0.998129	ENSGALG00000008177|ENSGALG00000023435	http://www.genome.jp/kegg-bin/show_pathway?gga00330/gga:427721%09red/gga:395504%09red
Regulation of actin cytoskeleton	KEGG PATHWAY	gga04810	7	177	0.647312	0.998129	ENSGALG00000010770|ENSGALG00000007511|ENSGALG00000003818|ENSGALG00000000681|ENSGALG00000012456|ENSGALG00000001446|Novel03046	http://www.genome.jp/kegg-bin/show_pathway?gga04810/gga:416246%09red/gga:374058%09red/gga:418044%09red/gga:395774%09red/gga:419083%09red/gga:420588%09red/gga:396181%09red
GnRH signaling pathway	KEGG PATHWAY	gga04912	3	77	0.651514	0.998129	ENSGALG00000013060|ENSGALG00000043401|ENSGALG00000043591	http://www.genome.jp/kegg-bin/show_pathway?gga04912/gga:423229%09red/gga:420935%09red/gga:428871%09red
beta-Alanine metabolism	KEGG PATHWAY	gga00410	1	26	0.68225	0.998129	ENSGALG00000016536	http://www.genome.jp/kegg-bin/show_pathway?gga00410/gga:395929%09red
Mucin type O-Glycan biosynthesis	KEGG PATHWAY	gga00512	1	26	0.68225	0.998129	ENSGALG00000014944	http://www.genome.jp/kegg-bin/show_pathway?gga00512/gga:427207%09red
RIG-I-like receptor signaling pathway	KEGG PATHWAY	gga04622	2	55	0.691496	0.998129	ENSGALG00000041192|ENSGALG00000011668	http://www.genome.jp/kegg-bin/show_pathway?gga04622/gga:395872%09red/gga:424185%09red
Other types of O-glycan biosynthesis	KEGG PATHWAY	gga00514	1	29	0.720311	0.998129	ENSGALG00000012442	http://www.genome.jp/kegg-bin/show_pathway?gga00514/gga:418042%09red
Oocyte meiosis	KEGG PATHWAY	gga04114	3	88	0.735037	0.998129	ENSGALG00000012755|ENSGALG00000002150|ENSGALG00000013060	http://www.genome.jp/kegg-bin/show_pathway?gga04114/gga:415326%09red/gga:420935%09red/gga:418090%09red
Tyrosine metabolism	KEGG PATHWAY	gga00350	1	31	0.743123	0.998129	ENSGALG00000004343	http://www.genome.jp/kegg-bin/show_pathway?gga00350/gga:416852%09red
Carbon metabolism	KEGG PATHWAY	gga01200	3	90	0.748396	0.998129	ENSGALG00000002988|ENSGALG00000016536|ENSGALG00000015849	http://www.genome.jp/kegg-bin/show_pathway?gga01200/gga:374189%09red/gga:395929%09red/gga:424381%09red
Pyrimidine metabolism	KEGG PATHWAY	gga00240	3	90	0.748396	0.998129	ENSGALG00000042801|ENSGALG00000041161|ENSGALG00000028982	http://www.genome.jp/kegg-bin/show_pathway?gga00240/gga:423871%09red/gga:421921%09red
FoxO signaling pathway	KEGG PATHWAY	gga04068	4	121	0.768429	0.998129	ENSGALG00000012755|ENSGALG00000026137|ENSGALG00000011360|ENSGALG00000013372	http://www.genome.jp/kegg-bin/show_pathway?gga04068/gga:395076%09red/gga:424208%09red/gga:426054%09red/gga:418090%09red
Starch and sucrose metabolism	KEGG PATHWAY	gga00500	1	35	0.783328	0.998129	ENSGALG00000017068	http://www.genome.jp/kegg-bin/show_pathway?gga00500/gga:418909%09red
TGF-beta signaling pathway	KEGG PATHWAY	gga04350	2	69	0.800339	0.998129	ENSGALG00000026137|ENSGALG00000009626	http://www.genome.jp/kegg-bin/show_pathway?gga04350/gga:373987%09red/gga:395076%09red
Nucleotide excision repair	KEGG PATHWAY	gga03420	1	37	0.80101	0.998129	Novel00109	http://www.genome.jp/kegg-bin/show_pathway?gga03420/gga:427153%09red
Tryptophan metabolism	KEGG PATHWAY	gga00380	1	39	0.817253	0.998129	ENSGALG00000016536	http://www.genome.jp/kegg-bin/show_pathway?gga00380/gga:395929%09red
MAPK signaling pathway	KEGG PATHWAY	gga04010	7	214	0.817566	0.998129	ENSGALG00000012594|ENSGALG00000041280|ENSGALG00000043591|ENSGALG00000036093|ENSGALG00000043401|ENSGALG00000000681|ENSGALG00000012456	http://www.genome.jp/kegg-bin/show_pathway?gga04010/gga:418044%09red/gga:423229%09red/gga:770905%09red/gga:396512%09red/gga:428871%09red/gga:419083%09red/gga:396157%09red
Hedgehog signaling pathway	KEGG PATHWAY	gga04340	1	45	0.858465	0.998129	ENSGALG00000000839	http://www.genome.jp/kegg-bin/show_pathway?gga04340/gga:395562%09red
Lysine degradation	KEGG PATHWAY	gga00310	1	45	0.858465	0.998129	ENSGALG00000016536	http://www.genome.jp/kegg-bin/show_pathway?gga00310/gga:395929%09red
Purine metabolism	KEGG PATHWAY	gga00230	4	148	0.881654	0.998129	ENSGALG00000042801|ENSGALG00000013060|ENSGALG00000041161|ENSGALG00000000549	http://www.genome.jp/kegg-bin/show_pathway?gga00230/gga:415859%09red/gga:423871%09red/gga:420935%09red
Glycerolipid metabolism	KEGG PATHWAY	gga00561	1	50	0.885627	0.998129	ENSGALG00000023517	http://www.genome.jp/kegg-bin/show_pathway?gga00561/gga:772114%09red
Wnt signaling pathway	KEGG PATHWAY	gga04310	3	119	0.887449	0.998129	ENSGALG00000012456|ENSGALG00000031997|ENSGALG00000000839	http://www.genome.jp/kegg-bin/show_pathway?gga04310/gga:418044%09red/gga:420732%09red/gga:395562%09red
mTOR signaling pathway	KEGG PATHWAY	gga04150	1	52	0.894975	0.998129	ENSGALG00000012755	http://www.genome.jp/kegg-bin/show_pathway?gga04150/gga:418090%09red
Melanogenesis	KEGG PATHWAY	gga04916	2	89	0.896853	0.998129	ENSGALG00000013060|ENSGALG00000000839	http://www.genome.jp/kegg-bin/show_pathway?gga04916/gga:420935%09red/gga:395562%09red
Inositol phosphate metabolism	KEGG PATHWAY	gga00562	1	57	0.915144	0.998129	ENSGALG00000004336	http://www.genome.jp/kegg-bin/show_pathway?gga00562/gga:428692%09red
Metabolic pathways	KEGG PATHWAY	gga01100	37	1049	0.920003	0.998129	ENSGALG00000034950|ENSGALG00000043591|ENSGALG00000008177|ENSGALG00000037880|ENSGALG00000042801|ENSGALG00000004491|ENSGALG00000036915|ENSGALG00000000549|ENSGALG00000004343|ENSGALG00000043401|ENSGALG00000023517|ENSGALG00000016555|ENSGALG00000015849|ENSGALG00000031142|ENSGALG00000028982|ENSGALG00000013211|ENSGALG00000038427|ENSGALG00000019175|ENSGALG00000014944|ENSGALG00000010628|ENSGALG00000041161|…	http://www.genome.jp/kegg-bin/show_pathway?gga01100/gga:374159%09red/gga:426847%09red/gga:422547%09red/gga:424005%09red/gga:423496%09red/gga:415807%09red/gga:416978%09red/gga:423229%09red/gga:422529%09red/gga:424381%09red/gga:418909%09red/gga:420335%09red/gga:395264%09red/gga:776432%09red/gga:395860%09red/gga:427207%09red/gga:421921%09red/gga:395346%09red/gga:423871%09red/gga:423769%09red/gga:415…
Cardiac muscle contraction	KEGG PATHWAY	gga04260	1	60	0.925339	0.998129	ENSGALG00000007205	http://www.genome.jp/kegg-bin/show_pathway?gga04260/gga:416978%09red
RNA degradation	KEGG PATHWAY	gga03018	1	63	0.934312	0.998129	ENSGALG00000026858	http://www.genome.jp/kegg-bin/show_pathway?gga03018/gga:419932%09red
Lysosome	KEGG PATHWAY	gga04142	2	107	0.944673	0.998129	ENSGALG00000008759|ENSGALG00000004252	http://www.genome.jp/kegg-bin/show_pathway?gga04142/gga:420160%09red/gga:424961%09red
Adherens junction	KEGG PATHWAY	gga04520	1	68	0.946939	0.998129	ENSGALG00000012456	http://www.genome.jp/kegg-bin/show_pathway?gga04520/gga:418044%09red
Apoptosis	KEGG PATHWAY	gga04210	1	69	0.949158	0.998129	ENSGALG00000025881	http://www.genome.jp/kegg-bin/show_pathway?gga04210/gga:771315%09red
Cell cycle	KEGG PATHWAY	gga04110	2	110	0.950233	0.998129	ENSGALG00000026137|ENSGALG00000010537	http://www.genome.jp/kegg-bin/show_pathway?gga04110/gga:429104%09red/gga:395076%09red
Oxidative phosphorylation	KEGG PATHWAY	gga00190	2	115	0.958335	0.998129	ENSGALG00000037880|ENSGALG00000007205	http://www.genome.jp/kegg-bin/show_pathway?gga00190/gga:374159%09red/gga:416978%09red
Peroxisome	KEGG PATHWAY	gga04146	1	74	0.958937	0.998129	ENSGALG00000010628	http://www.genome.jp/kegg-bin/show_pathway?gga04146/gga:422547%09red
Phosphatidylinositol signaling system	KEGG PATHWAY	gga04070	1	75	0.960655	0.998129	ENSGALG00000004336	http://www.genome.jp/kegg-bin/show_pathway?gga04070/gga:428692%09red
Adrenergic signaling in cardiomyocytes	KEGG PATHWAY	gga04261	2	121	0.966397	0.998129	ENSGALG00000007082|ENSGALG00000013060	http://www.genome.jp/kegg-bin/show_pathway?gga04261/gga:378903%09red/gga:420935%09red
Gap junction	KEGG PATHWAY	gga04540	1	80	0.968227	0.998129	ENSGALG00000013060	http://www.genome.jp/kegg-bin/show_pathway?gga04540/gga:420935%09red
RNA transport	KEGG PATHWAY	gga03013	2	129	0.974846	0.998129	ENSGALG00000034575|ENSGALG00000003818	http://www.genome.jp/kegg-bin/show_pathway?gga03013/gga:416246%09red/gga:423359%09red
Ribosome	KEGG PATHWAY	gga03010	1	120	0.994277	0.998129	ENSGALG00000005458	http://www.genome.jp/kegg-bin/show_pathway?gga03010/gga:416542%09red
Ubiquitin mediated proteolysis	KEGG PATHWAY	gga04120	1	124	0.99518	0.998129	Novel00109	http://www.genome.jp/kegg-bin/show_pathway?gga04120/gga:427153%09red
Protein processing in endoplasmic reticulum	KEGG PATHWAY	gga04141	1	146	0.998129	0.998129	ENSGALG00000027506	http://www.genome.jp/kegg-bin/show_pathway?gga04141/gga:427022%09red
