# Supplementary material for: Transcriptomic profile of leg muscle during early growth and development in Haiyang yellow chicken
Source: Copernicus journal article supplement (doi:10.5194/aab-64-405-2021), 2021-09-20
Supplement: Supplementary file [file aab-64-405-2021-supplement-title-page.pdf › aab-64-405-2021-supplement-title-page.pdf]

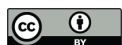

## *Supplement of*

# **Transcriptomic profile of leg muscle during early growth and development in Haiyang yellow chicken**

**Xuemei Yin et al.**

*Correspondence to:* Xuemei Yin (d160079@yzu.edu.cn) and Jinyu Wang (jywang@yzu.edu.cn)

- aab-64-405-2021-supplement-title-page.pdf
- Supplementary Files
  - Table S1.xlsx
  - Table S2.xlsx
  - Table S3.xlsx
  - Table S4.xls
  - Table S5.xls
  - Table S6.xls

The copyright of individual parts of the supplement might differ from the article licence.
